# Supplementary material for: Phosphoproteomics of ATR signaling in mouse testes
Source: eLife. 2022 Feb 8;11:e68648. doi: 10.7554/eLife.68648 (PMC8824463; doi:10.7554/eLife.68648)
Supplement: Supplementary file 1. — Complete list of phosphopeptides identified in each biological replicate for mice treated with ATRi for 4 hr and the Rad1 cKO conditions. Column header definitions can be found in sheet 1. See Materials and methods for details on data processing and filtering. Phosphosites removed by filtering can be found in the last tab. [file elife-68648-supp1.xlsx]

## Sheet: Description of columns
Column	Name	Description
A	ProtName_site	Name of protein and phosphorylated amino acid site
B	All_Parent_Proteins	List of all proteins from which the peptide could have been derived
C	UniProtID	UniProtID of identified protein
D	position	Position of phosphorylated residue within protein
E	BestProb	Phosphosite probability score
F	Sequence_window	Amino acid sequence surrounding phosphorylation site
G	P	Phosphorylated amino acid residue
H	P.1	Amino acid at the +1 site
I	P.2	Amino acid at the +2 site
J	P.3	Amino acid at the +3 site
K	Total_ExpObservations	Total number of experiments where this peptide was detected
L	AZ20_ExpObservations	Total number of ATRi (AZ20) experiments where the peptide was detected
M	RAD1_ExpObservations	Total number of RAD1 cKO experiments where the peptide was detected
N	AZ20_4hr_1_ratio	Ratio of 4 hour ATRi (AZ20)/vehicle from replicate 1
O	AZ20_4hr_2_ratio	Ratio of 4 hour ATRi (AZ20)/vehicle from replicate 2
P	AZ20_4hr_3_ratio	Ratio of 4 hour ATRi (AZ20)/vehicle from replicate 3
Q	AZ20_4hr_4_ratio	Ratio of 4 hour ATRi (AZ20)/vehicle from replicate 4
R	AZ20_4hr_5_ratio	Ratio of 4 hour ATRi (AZ20)/vehicle from replicate 5
S	RAD1_1_ratio	Ratio of Rad1 cKO/control from replicate 1
T	RAD1_2_ratio	Ratio of Rad1 cKO/control from replicate 2
U	RAD1_3_ratio	Ratio of Rad1 cKO/control from replicate 3
V	STY.Q.X	Phosphorylation at the S/T/Y-Q motif
W	AZ20_Ratio_Avg	Average ATRi (AZ20)/vehicle ratio from all replicates
X	AZ20_pval	AZ20 p-value
Y	RAD1_Ratio_Avg	Average Rad1 cKO/control ratio from all replicates
Z	RAD1_pval	Rad1 cKO p-value
AA	quadr	Quadrant location of phosphopeptides determined by 'Bowtie filtering', quadrants 1-4 (Q1, Q2, Q3, Q4), NR (between quadrants) or center (CENTER)
RemovedQuadrSites	This table contains phosphosites from quadrants that were removed with filtering (described in methods)

## Sheet: AZ20_4HR_QuadrFiltered
ProtName_site	All_Parent_Proteins	UniProtID	position	BestProb	Sequence_window		P.1	P.2	P.3	Total_ExpObservations	AZ20_ExpObservations	RAD1_ExpObservations	AZ20_4hr_1_ratio	AZ20_4hr_2_ratio	AZ20_4hr_3_ratio	AZ20_4hr_4_ratio	AZ20_4hr_5_ratio	RAD1_1_ratio	RAD1_2_ratio	RAD1_3_ratio	STY.Q.X	AZ20_Ratio_Avg	AZ20_pval	RAD1_Ratio_Avg	RAD1_pval	quadr
1433S_45	sp|O70456|1433S_MOUSE,sp|P61982|1433G_MOUSE,sp|P62259|1433E_MOUSE,sp|P63101|1433Z_MOUSE,sp|P68254|1433T_MOUSE,sp|P68510|1433F_MOUSE,sp|Q9CQV8|1433B_MOUSE	O70456	45	0.998	VEKGEELSCEERNLLSVAYKNVVGGQRAAWR	S	V	A	Y	7	4	3	0.361233	-0.71532	NA	0.00403802	-0.391557	0.121112	-0.327143	-0.041989	STYX	-0.185401	0.273935	-0.0826732	0.778003	CENTER
1433T_232	sp|P68254|1433T_MOUSE	P68254	232	0.997	IMQLLRDNLTLWTSDSAGEECDAAEGAEN__	S	A	G	E	4	2	2	0.375263	0.371607	NA	NA	NA	NA	-0.452045	1.08662	STYX	0.373435	0.050534	0.31729	0.675464	CENTER
1433Z_232	sp|P63101|1433Z_MOUSE	P63101	232	0.997	IMQLLRDNLTLWTSDTQGDEAEAGEGGEN__	T	Q	G	D	4	2	2	0.314206	-0.0792975	NA	NA	NA	NA	-0.439099	-0.413038	STYQ	0.117454	0.7555	-0.426069	0.203246	CENTER
2A5A_41	sp|Q6PD03|2A5A_MOUSE	Q6PD03	41	0.981	RKSVRKAQRQKRSQGSSQFRSQGSQAELHPL	S	S	Q	F	7	4	3	-0.274162	-0.0578941	0.16579	0.257366	NA	-1.42486	-0.885159	-1.27259	STYX	0.0227752	0.917507	-1.1942	0.00544064	NR
2A5A_41 42	sp|Q6PD03|2A5A_MOUSE	Q6PD03	41 42	0.893	RKSVRKAQRQKRSQGSSQFRSQGSQAELHPL KSVRKAQRQKRSQGSSQFRSQGSQAELHPLP	S	S	Q	F	8	5	3	-0.323991	-0.264083	0.561577	0.373427	0.284728	-1.19976	-1.12915	-0.937358	STYX	0.126332	0.627798	-1.08875	0.00614632	NR
2A5E_32	sp|Q61151|2A5E_MOUSE	Q61151	32	0.982	FSRKSVRKARQKRSQSSSQFRSQGKPIELTP	S	S	S	Q	4	2	2	NA	-0.0485095	NA	0.0131577	NA	-0.262171	NA	-0.635396	STYX	-0.0176759	0.59247	-0.448784	0.208351	CENTER
2A5E_32 33 34	sp|Q61151|2A5E_MOUSE	Q61151	32 33 34	0.899	FSRKSVRKARQKRSQSSSQFRSQGKPIELTP SRKSVRKARQKRSQSSSQFRSQGKPIELTPL RKSVRKARQKRSQSSSQFRSQGKPIELTPLP	S	S	S	Q	7	4	3	-0.0157479	NA	0.0510337	0.121203	0.271154	-0.0652594	-0.336172	-0.272139	STYX	0.106911	0.417135	-0.224524	0.400898	CENTER
2A5E_33	sp|Q61151|2A5E_MOUSE	Q61151	33	0.98	SRKSVRKARQKRSQSSSQFRSQGKPIELTPL	S	S	Q	F	7	4	3	0.247477	-0.239664	NA	0.264532	0.587439	-0.135818	-0.0392426	-0.138311	STYX	0.214946	0.224967	-0.104457	0.699833	CENTER
3BP1_576 577	sp|P55194|3BP1_MOUSE	P55194	576 577	0.898	PARPTMPPPQPSSTRSSPPAPSLPPGSVSPG ARPTMPPPQPSSTRSSPPAPSLPPGSVSPGT	S	S	P	P	5	2	3	0.00858005	0.086323	NA	NA	NA	-0.174598	-0.438182	-0.230361	STYX	0.0474515	0.867662	-0.281047	0.296397	CENTER
3BP1_632	sp|P55194|3BP1_MOUSE	P55194	632	0.998	VPPQPARRQSRRLPASPVISNMPAQVDQGVA	S	P	V	I	4	2	2	0.0215952	0.0958019	NA	NA	NA	-0.212991	NA	-0.318886	STYX	0.0586986	0.781021	-0.265939	0.410512	CENTER
3BP2_225	sp|Q06649|3BP2_MOUSE	Q06649	225	0.996	PVPRKPAFSDLPRAHSFTSKSPSPLLPPPPP	S	F	T	S	6	3	3	-0.601712	-0.560074	1.27163	NA	NA	0.0400756	-0.737398	-0.990643	STYX	0.0366157	0.32517	-0.562655	0.110847	CENTER
3BP2_277	sp|Q06649|3BP2_MOUSE	Q06649	277	0.996	RVEPGLRVPATPRRMSDPPMSNVPTVPNLRK	S	D	P	P	8	5	3	-0.296419	0.166865	0.025379	0.0991579	-0.194855	-0.498701	-0.801232	-0.213739	STYX	-0.0399744	0.468712	-0.504558	0.0958337	CENTER
3BP5_379	sp|Q9Z131|3BP5_MOUSE	Q9Z131	379	0.994	MFPILGPRSECSGASSPECEVERGDRAEGAE	S	P	E	C	6	4	2	-0.375518	0.177395	NA	0.129079	0.26107	-0.225628	-1.01144	NA	STYX	0.0480066	0.58061	-0.618536	0.147504	CENTER
3BP5L_13	sp|Q99LH9|3BP5L_MOUSE	Q99LH9	13	1	___MADLKKAAGGRETPQGELRSEVVEDEGP	T	P	Q	G	7	4	3	0.028666	-0.143661	0.0623049	NA	-0.272011	-0.407259	-0.442706	-0.716494	STYX	-0.0811753	0.214869	-0.522153	0.0730445	CENTER
3BP5L_342	sp|Q99LH9|3BP5L_MOUSE	Q99LH9	342	0.999	PDTDTLSLLSLRTVASDLQKCDSVEHLRGLS	S	D	L	Q	5	2	3	0.880007	-0.428258	NA	NA	NA	-0.0858678	-0.252118	0.0667408	STYX	0.225875	0.998889	-0.0904149	0.75138	CENTER
3BP5L_349	sp|Q99LH9|3BP5L_MOUSE	Q99LH9	349	1	LLSLRTVASDLQKCDSVEHLRGLSDHASLDG	S	V	E	H	7	4	3	0.6141	-0.396826	-0.0439423	-0.011333	NA	-0.346083	0.144971	0.0255532	STYX	0.0404995	0.629986	-0.0585195	0.853765	CENTER
3BP5L_361	sp|Q99LH9|3BP5L_MOUSE	Q99LH9	361	0.999	KCDSVEHLRGLSDHASLDGQELGAQSRGRRG	S	L	D	G	6	4	2	0.29775	-0.0962786	0.343049	NA	0.313022	NA	-0.169965	-0.733186	STYX	0.214386	0.143924	-0.451575	0.229196	CENTER
3BP5L_377	sp|Q99LH9|3BP5L_MOUSE	Q99LH9	377	1	LDGQELGAQSRGRRGSDIGVRGGRHQRSVSL	S	D	I	G	8	5	3	-0.143473	0.158742	-0.0937612	0.151784	0.223759	-0.936325	-1.00106	-0.605433	STYX	0.0594101	0.816031	-0.847606	0.0149683	NR
3MG_271 272 273	sp|Q04841|3MG_MOUSE	Q04841	271 272 273	0.895	LAQDDAVWLEHGPLESSSPAVVVAAARIGIG AQDDAVWLEHGPLESSSPAVVVAAARIGIGH QDDAVWLEHGPLESSSPAVVVAAARIGIGHA	S	S	S	P	5	3	2	1.45656	0.148455	0.267948	NA	NA	0.566726	-0.913933	NA	STYX	0.624322	0.0346538	-0.173603	0.769481	CENTER
3MG_273	sp|Q04841|3MG_MOUSE	Q04841	273	0.992	QDDAVWLEHGPLESSSPAVVVAAARIGIGHA	S	P	A	V	4	2	2	2.21081	1.10801	NA	NA	NA	NA	0.0992533	0.200091	STYX	1.65941	0.0160953	0.149672	0.610482	NR
41_543	sp|P48193|41_MOUSE	P48193	543	0.998	PAPHFERTASKRASRSLDGAAAAESTDRSPR	S	L	D	G	5	2	3	0.273239	-0.122837	NA	NA	NA	-0.529917	-0.223826	0.00979971	STYX	0.0752009	0.939626	-0.247981	0.380021	CENTER
41_97	sp|P48193|41_MOUSE	P48193	97	0.997	SRLLSSFLKRPKSQVSEEEGREVESEKEKGE	S	E	E	E	5	2	3	0.256716	4.10566	NA	NA	NA	-0.262409	0.00948783	-0.0519732	STYX	2.18119	0.0405657	-0.101631	0.714147	NR
4EBP1_33 34 35 36 43 44 45	sp|Q60876|4EBP1_MOUSE	Q60876	33 34 35 36 43 44 45	0.897	RRVALGDGVQLPPGDYSTTPGGTLFSTTPGG RVALGDGVQLPPGDYSTTPGGTLFSTTPGGT VALGDGVQLPPGDYSTTPGGTLFSTTPGGTR ALGDGVQLPPGDYSTTPGGTLFSTTPGGTRI LPPGDYSTTPGGTLFSTTPGGTRIIYDRKFL PPGDYSTTPGGTLFSTTPGGTRIIYDRKFLM PGDYSTTPGGTLFSTTPGGTRIIYDRKFLME	Y	S	T	T	5	2	3	-0.015162	0.244694	NA	NA	NA	0.00145742	-0.539403	-0.200822	STYX	0.114766	0.585244	-0.246256	0.38688	CENTER
4EBP1_43 44 45	sp|Q60876|4EBP1_MOUSE	Q60876	43 44 45	0.884	LPPGDYSTTPGGTLFSTTPGGTRIIYDRKFL PPGDYSTTPGGTLFSTTPGGTRIIYDRKFLM PGDYSTTPGGTLFSTTPGGTRIIYDRKFLME	S	T	T	P	7	4	3	0.489672	0.182913	6.6152	0.472961	NA	0.0528411	-0.258284	-0.103535	STYX	1.94019	0.00464674	-0.102993	0.714546	NR
4EBP1_45	sp|Q60876|4EBP1_MOUSE	Q60876	45	0.995	PGDYSTTPGGTLFSTTPGGTRIIYDRKFLME	T	P	G	G	5	2	3	0.315505	0.144138	NA	NA	NA	-0.224435	-0.0960325	0.0856409	STYX	0.229821	0.150828	-0.0782756	0.786526	CENTER
4EBP1_69	sp|Q60876|4EBP1_MOUSE	Q60876	69	0.998	DRKFLMECRNSPVAKTPPKDLPAIPGVTSPT	T	P	P	K	5	2	3	NA	-0.0778153	-0.126974	NA	NA	-0.358846	-0.685582	0.00247701	STYX	-0.102395	0.166395	-0.347317	0.241943	CENTER
4EBP2_44 45 46	sp|P70445|4EBP2_MOUSE	P70445	44 45 46	0.857	QLPQDYCTTPGGTLFSTTPGGTRIIYDRKFL LPQDYCTTPGGTLFSTTPGGTRIIYDRKFLL PQDYCTTPGGTLFSTTPGGTRIIYDRKFLLD	S	T	T	P	8	5	3	0.0603231	0.0514992	0.514559	0.0716721	0.0874871	0.347903	0.298357	-6.60839	STYX	0.157108	0.235112	-1.98738	0.848734	NR
4EBP2_46	sp|P70445|4EBP2_MOUSE	P70445	46	0.993	PQDYCTTPGGTLFSTTPGGTRIIYDRKFLLD	T	P	G	G	6	3	3	-0.0110841	-0.0780112	NA	NA	0.273316	0.0732169	-0.0723778	-0.305942	STYX	0.0614069	0.980639	-0.101701	0.720141	CENTER
4ET_344	sp|Q9EST3|4ET_MOUSE	Q9EST3	344	0.997	GSVSASRFSRWFSNPSRSGSRSSSLGSTPHE	S	R	S	G	5	2	3	NA	-0.576726	NA	NA	-0.196288	-0.263888	-0.0416206	0.420391	STYX	-0.386507	0.029813	0.0382939	0.903422	CENTER
4ET_352	sp|Q9EST3|4ET_MOUSE	Q9EST3	352	0.984	SRWFSNPSRSGSRSSSLGSTPHEELERLAGL	S	L	G	S	5	3	2	1.05654	0.647586	0.175393	NA	NA	NA	0.156173	0.0853744	STYX	0.626507	0.0163538	0.120774	0.671041	CENTER
4ET_563	sp|Q9EST3|4ET_MOUSE	Q9EST3	563	0.999	GSLEATASLLSQRAPSPPMSQVFRTQAASAD	S	P	P	M	8	5	3	0.406069	-0.164128	-0.157331	-0.0596204	-0.323578	-0.248765	-0.326169	0.0336236	STYX	-0.0597176	0.130149	-0.180437	0.50443	CENTER
4ET_586	sp|Q9EST3|4ET_MOUSE	Q9EST3	586	0.999	RTQAASADYLHPRIPSPIGFPSGPQQLLGDP	S	P	I	G	6	3	3	0.503655	0.130919	NA	NA	-0.215968	0.0885442	-0.197188	0.368632	STYX	0.139535	0.656093	0.0866625	0.740346	CENTER
4ET_76 77	sp|Q9EST3|4ET_MOUSE	Q9EST3	76 77	0.881	DPEKWHASLYPASGRSSPVESLKKESESDRP PEKWHASLYPASGRSSPVESLKKESESDRPS	S	S	P	V	5	2	3	NA	-0.0105508	-0.0318502	NA	NA	-0.0980286	0.141696	0.200676	STYX	-0.0212005	0.564369	0.0814479	0.721442	CENTER
4ET_77	sp|Q9EST3|4ET_MOUSE	Q9EST3	77	0.991	PEKWHASLYPASGRSSPVESLKKESESDRPS	S	P	V	E	6	3	3	1.06326	-0.0539568	-0.182357	NA	NA	-0.131312	0.162675	0.297962	STYX	0.275649	0.852612	0.109775	0.658607	CENTER
4ET_947 948 949	sp|Q9EST3|4ET_MOUSE	Q9EST3	947 948 949	0.894	MPHMHSQLEHRTSQRSSSPVGLAKWFGSDVL PHMHSQLEHRTSQRSSSPVGLAKWFGSDVLQ HMHSQLEHRTSQRSSSPVGLAKWFGSDVLQQ	S	S	S	P	8	5	3	0.698287	-0.430755	-0.242832	0.146085	-0.0207157	-0.0214774	0.0239215	-0.178215	STYX	0.0300138	0.60318	-0.0585902	0.841721	CENTER
4ET_949	sp|Q9EST3|4ET_MOUSE	Q9EST3	949	0.985	HMHSQLEHRTSQRSSSPVGLAKWFGSDVLQQ	S	P	V	G	8	5	3	0.475569	-0.392557	-0.199223	0.0950326	-0.244781	-0.0964351	0.0525116	-0.0163656	STYX	-0.0531917	0.258205	-0.0200964	0.964753	CENTER
5NT1B_109 110	sp|Q91YE9|5NT1B_MOUSE	Q91YE9	109 110	0.89	STTSRTSSASPSQHETSPPPQTSEKSSIQQT TTSRTSSASPSQHETSPPPQTSEKSSIQQTP	T	S	P	P	7	5	2	-1.24133	0.0220966	-0.0389899	-6.64	6.60726	0.464463	0.97052	NA	STYX	-0.258193	0.295497	0.717491	0.0894806	CENTER
5NT1B_183	sp|Q91YE9|5NT1B_MOUSE	Q91YE9	183	0.994	EPRDLQLRDYAYSCDSREGMPKTREYPRTPP	S	R	E	G	7	5	2	-0.118074	-0.638548	-0.521586	-0.698163	0.0555084	NA	0.682496	-0.0374883	STYX	-0.384172	0.00753614	0.322504	0.418003	CENTER
5NT1B_19	sp|Q91YE9|5NT1B_MOUSE	Q91YE9	19	0.992	TSLKHKKKNEPGMRYSKESLDAEKRKDSDKT	S	K	E	S	5	3	2	0.139343	-0.682901	-0.0936342	NA	NA	NA	1.07257	1.14593	STYX	-0.212397	0.264254	1.10925	0.0286845	NR
5NT1B_214	sp|Q91YE9|5NT1B_MOUSE	Q91YE9	214	0.998	TEWKPYAQRRLQYGTSVDMEPEYISDGPQQR	S	V	D	M	8	5	3	-0.0557434	-0.239823	0.239965	0.300182	0.0228197	0.0685301	-0.0296233	-0.21592	STYX	0.0534802	0.940108	-0.0590043	0.841617	CENTER
5NT1B_43	sp|Q91YE9|5NT1B_MOUSE	Q91YE9	43	0.999	RKDSDKTGARLSTQGSQELPLHNTDSRGYVV	S	Q	E	L	7	5	2	-0.275871	-0.157939	0.166378	-0.21328	0.960897	NA	-0.107734	-0.376774	STYQ	0.096037	0.45235	-0.242254	0.463506	CENTER
5NT1B_53	sp|Q91YE9|5NT1B_MOUSE	Q91YE9	53	0.997	LSTQGSQELPLHNTDSRGYVVRNQWSRTSRS	S	R	G	Y	7	5	2	-0.302	-0.237893	0.0286117	0.278209	0.32181	NA	0.391528	0.108479	STYX	0.0177475	0.817961	0.250003	0.44066	CENTER
5NT1B_65 66	sp|Q91YE9|5NT1B_MOUSE	Q91YE9	65 66	0.896	NTDSRGYVVRNQWSRTSRSPSTGAPSVDEPR TDSRGYVVRNQWSRTSRSPSTGAPSVDEPRS	T	S	R	S	8	5	3	-0.68668	-0.186511	0.0318251	-0.175754	0.198179	1.32479	0.288783	0.36351	STYX	-0.163788	0.130596	0.659028	0.0796981	CENTER
5NT1B_68	sp|Q91YE9|5NT1B_MOUSE	Q91YE9	68	0.996	SRGYVVRNQWSRTSRSPSTGAPSVDEPRSRN	S	P	S	T	8	5	3	-0.453027	-0.0281773	-0.21101	-0.230469	0.418447	0.822646	0.468839	0.495322	STYX	-0.100847	0.111614	0.595603	0.0583623	CENTER
5NT1B_70	sp|Q91YE9|5NT1B_MOUSE	Q91YE9	70	0.994	GYVVRNQWSRTSRSPSTGAPSVDEPRSRNTA	S	T	G	A	8	5	3	-0.234427	-0.536868	-0.129605	-0.246224	0.455555	-0.188352	-0.309701	-0.212902	STYX	-0.138314	0.0560992	-0.236985	0.36859	CENTER
5NT1B_70 71	sp|Q91YE9|5NT1B_MOUSE	Q91YE9	70 71	0.898	GYVVRNQWSRTSRSPSTGAPSVDEPRSRNTA YVVRNQWSRTSRSPSTGAPSVDEPRSRNTAI	S	T	G	A	7	5	2	-0.21381	-0.228931	-0.0369682	-0.149605	0.150514	-0.231085	NA	0.663975	STYX	-0.0957598	0.0850155	0.216445	0.628035	CENTER
6PGL_49	sp|Q9CQ60|6PGL_MOUSE	Q9CQ60	49	0.998	LEGDRGRFALGLSGGSLVSMLARDLPAAAAP	S	L	V	S	5	2	3	0.307652	-0.642186	NA	NA	NA	-0.117117	-0.830671	-0.456363	STYX	-0.167267	0.762855	-0.46805	0.129982	CENTER
A0A087WP11_99	tr|A0A087WP11|A0A087WP11_MOUSE,tr|J3QP08|J3QP08_MOUSE,sp|Q5M8Q2|H2AL1_MOUSE,tr|Q810S6|Q810S6_MOUSE,tr|Q9DAD9|Q9DAD9_MOUSE	A0A087WP11	99	0.995	QNNEQLRQLFKPGGTSVNEDDN_________	S	V	N	E	8	5	3	0.588325	0.350987	0.123057	0.0354513	-0.0864336	1.238	0.90992	1.12733	STYX	0.202277	0.227244	1.09175	0.00818025	NR
A0A087WP63_1683	tr|A0A087WP63|A0A087WP63_MOUSE,tr|A0A087WQ44|A0A087WQ44_MOUSE	A0A087WP63	1683	0.999	PKDEPETLTLRSGPPSPLPTATSFSGPRPRR	S	P	L	P	8	5	3	-0.0297151	0.181895	0.0234902	-0.000212422	0.000539372	-0.0333164	0.147451	-0.000438475	STYX	0.0351995	0.966008	0.0378988	0.855339	CENTER
A0A087WP63_255	tr|A0A087WP63|A0A087WP63_MOUSE,tr|A0A087WQ44|A0A087WQ44_MOUSE	A0A087WP63	255	0.997	KAGSSPCLGSSSAASSPPPPVSRLDDEDGDF	S	P	P	P	4	2	2	-0.472828	0.127066	NA	NA	NA	-0.0423038	NA	1.12931	STYX	-0.172881	0.470627	0.543502	0.29721	CENTER
A0A087WP63_2738	tr|A0A087WP63|A0A087WP63_MOUSE,tr|A0A087WQ44|A0A087WQ44_MOUSE	A0A087WP63	2738	1	PAVKRRRGRPPKKNRSPADAGRGVDEVPSSI	S	P	A	D	6	3	3	-2.00786	2.05666	NA	NA	0.218751	2.59914	2.61433	1.98745	STYX	0.0891821	0.549389	2.4003	0.00291781	NR
A0A087WP63_560	tr|A0A087WP63|A0A087WP63_MOUSE,tr|A0A087WQ44|A0A087WQ44_MOUSE	A0A087WP63	560	0.998	YLLARDDERSEVDGGSGPPTPGPTTTLGPKK	S	G	P	P	4	2	2	0.144911	0.376834	NA	NA	NA	0.042761	NA	0.0762357	STYX	0.260872	0.131761	0.0594983	0.823436	CENTER
A0A087WPY7_100	tr|A0A087WPY7|A0A087WPY7_MOUSE,tr|A0A087WR82|A0A087WR82_MOUSE,tr|B2RWR6|B2RWR6_MOUSE,tr|J3QK27|J3QK27_MOUSE,sp|O35698|RBY1A_MOUSE,sp|Q60990|RBY1B_MOUSE	A0A087WPY7	100	0.994	RRPSSLESGSKKRPPSFSRTRGASRILKCGR	S	F	S	R	7	4	3	-1.31972	0.19191	-0.00316502	-0.121113	NA	-0.360808	-0.302933	-1.26995	STYX	-0.313022	0.287933	-0.644565	0.0740126	CENTER
A0A087WPY7_137	tr|A0A087WPY7|A0A087WPY7_MOUSE,tr|A0A087WR82|A0A087WR82_MOUSE,tr|B2RWR6|B2RWR6_MOUSE,tr|J3QK27|J3QK27_MOUSE,sp|O35698|RBY1A_MOUSE,sp|Q60990|RBY1B_MOUSE	A0A087WPY7	137	0.997	RSGPSCEGNLGGDRYTPNFNVSSSGRHFAVK	T	P	N	F	8	5	3	-2.09085	0.132141	0.255846	0.0900291	0.124267	-0.24271	-0.252619	-0.190124	STYX	-0.297714	0.596555	-0.228484	0.38578	CENTER
A0A087WPY7_88	tr|A0A087WPY7|A0A087WPY7_MOUSE,tr|A0A087WR82|A0A087WR82_MOUSE,tr|B2RWR6|B2RWR6_MOUSE,tr|J3QK27|J3QK27_MOUSE,sp|O35698|RBY1A_MOUSE,sp|Q60990|RBY1B_MOUSE	A0A087WPY7	88	0.988	ILDGKRIKVKQARRPSSLESGSKKRPPSFSR	S	S	L	E	7	5	2	0.0545842	0.289929	0.344534	0.105679	0.150688	NA	-0.67419	-0.573979	STYX	0.189083	0.068797	-0.624084	0.0916019	CENTER
A0A087WPY7_88 89	tr|A0A087WPY7|A0A087WPY7_MOUSE,tr|A0A087WR82|A0A087WR82_MOUSE,tr|B2RWR6|B2RWR6_MOUSE,tr|J3QK27|J3QK27_MOUSE,sp|O35698|RBY1A_MOUSE,sp|Q60990|RBY1B_MOUSE	A0A087WPY7	88 89	0.899	ILDGKRIKVKQARRPSSLESGSKKRPPSFSR LDGKRIKVKQARRPSSLESGSKKRPPSFSRT	S	S	L	E	8	5	3	-0.985561	-0.0248813	0.241306	-0.12707	0.201617	-0.134451	-0.103732	-0.962904	STYX	-0.138918	0.600152	-0.400362	0.242428	CENTER
A0A087WPY7_88 89 92	tr|A0A087WPY7|A0A087WPY7_MOUSE,tr|A0A087WR82|A0A087WR82_MOUSE,tr|B2RWR6|B2RWR6_MOUSE,tr|J3QK27|J3QK27_MOUSE,sp|O35698|RBY1A_MOUSE,sp|Q60990|RBY1B_MOUSE	A0A087WPY7	88 89 92	0.899	ILDGKRIKVKQARRPSSLESGSKKRPPSFSR LDGKRIKVKQARRPSSLESGSKKRPPSFSRT KRIKVKQARRPSSLESGSKKRPPSFSRTRGA	S	S	L	E	4	2	2	-0.89195	1.37402	NA	NA	NA	NA	-0.4168	-0.553122	STYX	0.241033	0.987391	-0.484961	0.161387	CENTER
A0A087WPY7_89	tr|A0A087WPY7|A0A087WPY7_MOUSE,tr|A0A087WR82|A0A087WR82_MOUSE,tr|B2RWR6|B2RWR6_MOUSE,tr|J3QK27|J3QK27_MOUSE,sp|O35698|RBY1A_MOUSE,sp|Q60990|RBY1B_MOUSE	A0A087WPY7	89	0.992	LDGKRIKVKQARRPSSLESGSKKRPPSFSRT	S	L	E	S	6	3	3	-0.902237	-0.0342706	NA	-0.0734071	NA	0.132723	0.0109282	-0.743512	STYX	-0.336638	0.0791255	-0.199954	0.573724	CENTER
A0A087WQP8_54	tr|A0A087WQP8|A0A087WQP8_MOUSE,tr|A0A0G2JE01|A0A0G2JE01_MOUSE,tr|D3YYI9|D3YYI9_MOUSE,tr|E9Q4E0|E9Q4E0_MOUSE,tr|K7N5V5|K7N5V5_MOUSE,tr|K7N660|K7N660_MOUSE	A0A087WQP8	54	0.986	RRWTWRMCMAHGQTTSPVPVKSKKQFEKEEK	S	P	V	P	6	3	3	NA	-0.409622	-0.112693	NA	0.0123824	0.872062	1.08096	1.06875	STYX	-0.169977	0.101816	1.00725	0.0100625	NR
A0A087WR45_376	tr|A0A087WR45|A0A087WR45_MOUSE	A0A087WR45	376	0.973	QFPRETPDRTVPRARSPPFHSRGSRVVPSRV	S	P	P	F	7	4	3	-0.539986	NA	0.0976367	0.128909	-0.111321	0.359845	0.291353	0.276251	STYX	-0.10619	0.427109	0.30915	0.244048	CENTER
A0A087WRI3_173	tr|A0A087WRI3|A0A087WRI3_MOUSE	A0A087WRI3	173	0.968	KEPPPIPPNMTFGIRSRPSTPFFDLLQHRYQ	S	R	P	S	8	5	3	0.243216	0.0428748	0.391014	-0.384166	-0.187614	3.56317	0.980021	0.717749	STYX	0.021065	0.877571	1.75365	0.0100198	NR
A0A087WRI3_176 177	tr|A0A087WRI3|A0A087WRI3_MOUSE	A0A087WRI3	176 177	0.886	PPIPPNMTFGIRSRPSTPFFDLLQHRYQQLW PIPPNMTFGIRSRPSTPFFDLLQHRYQQLWV	S	T	P	F	8	5	3	0.0755023	-0.112843	0.397274	-0.0139202	-0.214954	0.398934	0.517828	0.649132	STYX	0.0262118	0.635089	0.521965	0.082258	CENTER
A0A087WRI3_177	tr|A0A087WRI3|A0A087WRI3_MOUSE	A0A087WRI3	177	0.995	PIPPNMTFGIRSRPSTPFFDLLQHRYQQLWV	T	P	F	F	8	5	3	0.35533	0.0330317	0.628796	-0.107689	-0.225888	0.996977	0.540882	0.988295	STYX	0.136716	0.822309	0.842051	0.0208289	NR
A0A087WRI3_26	tr|A0A087WRI3|A0A087WRI3_MOUSE	A0A087WRI3	26	0.997	LTAWKKKKQPVHRTVSQICPPPRRPLTVVDI	S	Q	I	C	8	5	3	0.124863	-0.217438	0.00141926	-0.0264412	-0.0424635	0.43675	-0.0256377	0.422995	STYQ	-0.0320121	0.362683	0.278036	0.321959	CENTER
A0A087WSD2_276	tr|A0A087WSD2|A0A087WSD2_MOUSE	A0A087WSD2	276	0.999	DKGTSFMYVPEEQEATPPLSPEQEIKLNALP	T	P	P	L	8	5	3	0.191896	-0.0994379	0.494965	-0.0372964	-0.0208068	0.621817	0.827173	1.04409	STYX	0.105864	0.80471	0.831027	0.0201305	NR
A0A087WSD2_473 474	tr|A0A087WSD2|A0A087WSD2_MOUSE	A0A087WSD2	473 474	0.879	TPYQDLPYQVLLIKDTSPQGTPYQYILTKEI PYQDLPYQVLLIKDTSPQGTPYQYILTKEIP	T	S	P	Q	6	4	2	0.138416	-0.335522	0.0830662	NA	0.0665381	NA	0.997878	-0.923555	STYX	-0.0118755	0.913648	0.0371616	0.997191	CENTER
A0A087WSD2_495	tr|A0A087WSD2|A0A087WSD2_MOUSE	A0A087WSD2	495	0.982	YQYILTKEIPFQETPSQGTLSQESPSQWTLS	S	Q	G	T	7	4	3	-0.118085	NA	0.726922	-0.170684	0.26534	1.16371	0.717308	0.856358	STYQ	0.175873	0.82285	0.912459	0.0149517	NR
A0A087WSD2_498	tr|A0A087WSD2|A0A087WSD2_MOUSE	A0A087WSD2	498	0.995	ILTKEIPFQETPSQGTLSQESPSQWTLSKGT	T	L	S	Q	8	5	3	-0.0873531	-0.247293	0.509233	0.349129	0.089597	1.3455	0.786222	0.992054	STYX	0.122663	0.68017	1.04126	0.01035	NR
A0A087WSD2_500	tr|A0A087WSD2|A0A087WSD2_MOUSE	A0A087WSD2	500	0.997	TKEIPFQETPSQGTLSQESPSQWTLSKGTPS	S	Q	E	S	7	5	2	0.113267	-0.613705	0.837763	-0.207923	0.11722	0.606069	0.705228	NA	STYQ	0.0493246	0.896876	0.655648	0.0935709	CENTER
A0A087WSD2_503	tr|A0A087WSD2|A0A087WSD2_MOUSE	A0A087WSD2	503	0.998	IPFQETPSQGTLSQESPSQWTLSKGTPSQGT	S	P	S	Q	8	5	3	-0.144013	-0.238573	0.72867	0.256209	-0.101912	0.878896	0.661864	1.01564	STYX	0.100076	0.701086	0.852133	0.0180844	NR
A0A087WSD2_518 519	tr|A0A087WSD2|A0A087WSD2_MOUSE	A0A087WSD2	518 519	0.894	SPSQWTLSKGTPSQGTSPKGTPSQVTPPQGT PSQWTLSKGTPSQGTSPKGTPSQVTPPQGTP	T	S	P	K	7	5	2	-1.21804	0.564774	0.743404	0.174292	-0.0333045	1.7214	1.20899	NA	STYX	0.0462249	0.40953	1.4652	0.0202638	NR
A0A087WSD2_519	tr|A0A087WSD2|A0A087WSD2_MOUSE	A0A087WSD2	519	0.997	PSQWTLSKGTPSQGTSPKGTPSQVTPPQGTP	S	P	K	G	5	2	3	-0.995201	1.46349	NA	NA	NA	1.65608	2.14018	1.22523	STYX	0.234145	0.989874	1.67383	0.00392815	NR
A0A087WSD2_704	tr|A0A087WSD2|A0A087WSD2_MOUSE	A0A087WSD2	704	0.999	PSQETVPQETPPQKLSFQDILTKDRSSQETA	S	F	Q	D	4	2	2	0.328114	-0.642706	NA	NA	NA	0.688465	0.792908	NA	STYX	-0.157296	0.779513	0.740687	0.0710108	CENTER
A0A087WSD2_867	tr|A0A087WSD2|A0A087WSD2_MOUSE	A0A087WSD2	867	0.989	YSVDLQVKSEKPRRYSEDLQSKTSRRKSIDQ	S	E	D	L	7	5	2	-0.0314518	-0.769822	0.154038	0.0035438	0.348947	NA	0.168366	0.900677	STYX	-0.0589489	0.899991	0.534521	0.196524	CENTER
A0A0A6YVU8_211	tr|A0A0A6YVU8|A0A0A6YVU8_MOUSE,sp|Q9JKV1|ADRM1_MOUSE	A0A0A6YVU8	211	0.996	GSSGPPASSSSSSSRSQSAAVTPSSSTSSAR	S	Q	S	A	4	2	2	-0.655456	NA	-0.166835	NA	NA	0.0272508	-0.0161424	NA	STYQ	-0.411146	0.0345765	0.0055542	0.967017	CENTER
A0A0A6YVU8_213	tr|A0A0A6YVU8|A0A0A6YVU8_MOUSE,sp|Q9JKV1|ADRM1_MOUSE	A0A0A6YVU8	213	0.993	SGPPASSSSSSSRSQSAAVTPSSSTSSARAT	S	A	A	V	5	2	3	NA	NA	-0.186248	NA	0.21372	0.0333269	0.281357	-0.0121596	STYX	0.0137357	0.824074	0.100841	0.683071	CENTER
A0A0A6YVU8_217	tr|A0A0A6YVU8|A0A0A6YVU8_MOUSE,sp|Q9JKV1|ADRM1_MOUSE	A0A0A6YVU8	217	0.998	ASSSSSSSRSQSAAVTPSSSTSSARATPAPS	T	P	S	S	8	5	3	-0.519505	0.180366	-0.204519	-0.17599	0.49904	0.408647	0.77533	0.231483	STYX	-0.0441217	0.379183	0.47182	0.120467	CENTER
A0A0A6YVU8_219 220 221 222 223 224	tr|A0A0A6YVU8|A0A0A6YVU8_MOUSE,sp|Q9JKV1|ADRM1_MOUSE	A0A0A6YVU8	219 220 221 222 223 224	0.888	SSSSSSRSQSAAVTPSSSTSSARATPAPSAP SSSSSRSQSAAVTPSSSTSSARATPAPSAPA SSSSRSQSAAVTPSSSTSSARATPAPSAPAA SSSRSQSAAVTPSSSTSSARATPAPSAPAAA SSRSQSAAVTPSSSTSSARATPAPSAPAAAS SRSQSAAVTPSSSTSSARATPAPSAPAAASA	S	S	S	T	8	5	3	-0.561807	-0.0100857	-0.247036	-0.375861	0.42378	0.211386	0.219634	0.119328	STYX	-0.154202	0.10153	0.183449	0.452752	CENTER
A0A0A6YW05_23	tr|A0A0A6YW05|A0A0A6YW05_MOUSE,sp|O08716|FABP9_MOUSE	A0A0A6YW05	23	0.984	LCTMIEPFLGTWKLISSENFENYVRELGVEC	S	S	E	N	6	4	2	NA	-0.495448	-0.438267	-0.204145	-0.164933	0.55819	-0.466812	NA	STYX	-0.325698	0.00265436	0.0456889	0.947706	CENTER
A0A0A6YW05_23 24	tr|A0A0A6YW05|A0A0A6YW05_MOUSE,sp|O08716|FABP9_MOUSE	A0A0A6YW05	23 24	0.889	LCTMIEPFLGTWKLISSENFENYVRELGVEC CTMIEPFLGTWKLISSENFENYVRELGVECE	S	S	E	N	8	5	3	0.178929	-0.508579	-0.119111	-0.218494	-0.320303	0.534785	0.782909	0.188353	STYX	-0.197511	0.0294466	0.502016	0.106313	CENTER
A0A0A6YW05_54	tr|A0A0A6YW05|A0A0A6YW05_MOUSE,sp|O08716|FABP9_MOUSE	A0A0A6YW05	54	0.984	EPRKVACLIKPSVSISFNGERMDIQAGSACR	S	F	N	G	4	2	2	0.230792	NA	0.531117	NA	NA	NA	0.579646	0.67669	STYX	0.380955	0.0625931	0.628167	0.103757	CENTER
A0A0A6YW67_57	tr|A0A0A6YW67|A0A0A6YW67_MOUSE,tr|D3YYZ2|D3YYZ2_MOUSE,sp|P0CG49|UBB_MOUSE,sp|P0CG49|UBB_MOUSE,sp|P0CG49|UBB_MOUSE,sp|P0CG49|UBB_MOUSE,sp|P0CG50|UBC_MOUSE,sp|P0CG50|UBC_MOUSE,sp|P0CG50|UBC_MOUSE,sp|P0CG50|UBC_MOUSE,sp|P0CG50|UBC_MOUSE,sp|P0CG50|UBC_MOUSE,sp|P0CG50|UBC_MOUSE,sp|P0CG50|UBC_MOUSE,sp|P0CG50|UBC_MOUSE,sp|P62983|RS27A_MOUSE,sp|P62984|RL40_MOUSE	A0A0A6YW67	57	0.992	RLIFAGKQLEDGRTLSDYNIQKESTLHLVLR	S	D	Y	N	7	4	3	0.0909727	-0.452065	-0.138376	NA	-0.230828	1.0183	0.577321	1.16863	STYX	-0.182574	0.0541767	0.921415	0.0162525	NR
A0A0A6YW72_17	tr|A0A0A6YW72|A0A0A6YW72_MOUSE	A0A0A6YW72	17	1	SPAGRRMGEGRQPAGSPRGRPRGAGAQSSLL	S	P	R	G	8	5	3	0.308874	0.354896	0.237399	0.456399	-0.188849	-1.10796	-1.59559	-0.986125	STYX	0.233744	0.0829915	-1.22989	0.00517562	NR
A0A0A6YY83_974	tr|A0A0A6YY83|A0A0A6YY83_MOUSE	A0A0A6YY83	974	0.989	PNGQRYDSVNEKLSDSPSMGRYRSVNGGPGS	S	P	S	M	5	2	3	0.511086	-0.692234	NA	NA	NA	0.16435	-0.0229902	-0.0322807	STYX	-0.090574	0.897516	0.0363597	0.860588	CENTER
A0A0G2JEB6_1404	tr|A0A0G2JEB6|A0A0G2JEB6_MOUSE	A0A0G2JEB6	1404	1	RRDSKSFASQKMKRGSLVPKFNDAEVICGNL	S	L	V	P	4	2	2	NA	-0.0694794	NA	-0.0733585	NA	0.979052	NA	1.26436	STYX	-0.0714189	0.26074	1.12171	0.0292016	NR
A0A0G2JFD5_54	tr|A0A0G2JFD5|A0A0G2JFD5_MOUSE,tr|A0A0G2JFY7|A0A0G2JFY7_MOUSE,tr|A0A0G2JGJ6|A0A0G2JGJ6_MOUSE,tr|G3UXD1|G3UXD1_MOUSE,tr|K7N6A0|K7N6A0_MOUSE,tr|K7N6S8|K7N6S8_MOUSE,tr|K7N6W5|K7N6W5_MOUSE,tr|L7N216|L7N216_MOUSE,tr|Q80ZT2|Q80ZT2_MOUSE,tr|Q8C5Y0|Q8C5Y0_MOUSE	A0A0G2JFD5	54	0.996	RRVTWRMWMALRQTSSPVPVISKKQFEKEEK	S	P	V	P	4	2	2	NA	-0.342408	-0.140695	NA	NA	NA	0.408213	0.65589	STYX	-0.241551	0.0489898	0.532051	0.151434	CENTER
A0A0G2JGR8_54	tr|A0A0G2JGR8|A0A0G2JGR8_MOUSE,tr|D3Z6R1|D3Z6R1_MOUSE	A0A0G2JGR8	54	0.996	RRWTWRMWMAHRQTTSPVPVTSKKQFEKEEK	S	P	V	P	7	4	3	-0.00296226	-0.490532	NA	0.00578606	0.0269671	0.545937	0.753653	1.25102	STYX	-0.115185	0.280797	0.850203	0.0228436	NR
A0A0R4J054_68	tr|A0A0R4J054|A0A0R4J054_MOUSE	A0A0R4J054	68	1	CEAVFGPSIMKNWHGSPRGHDALKRKPLMTG	S	P	R	G	8	5	3	0.0370986	-0.735327	0.0428055	0.139534	0.0434567	1.13127	0.344427	0.699275	STYX	-0.0944866	0.743747	0.72499	0.0414124	CENTER
A0A0R4J054_901 902	tr|A0A0R4J054|A0A0R4J054_MOUSE	A0A0R4J054	901 902	0.887	ATKLAQEVNNMKLTLTSPGKSSQ________ TKLAQEVNNMKLTLTSPGKSSQ_________	T	S	P	G	7	4	3	0.173209	-0.0951336	NA	-0.0543607	0.204293	0.84319	0.695736	1.14468	STYX	0.0570019	0.899427	0.894536	0.0160339	NR
A0A0U1RNF2_247	tr|A0A0U1RNF2|A0A0U1RNF2_MOUSE	A0A0U1RNF2	247	0.998	DDRFGQIMIENLRRRSCDLAGVETCKSLESQ	S	C	D	L	8	5	3	0.364005	0.306442	-0.12361	-0.0616948	0.109875	-0.750614	-0.676048	-0.931804	STYX	0.119003	0.541358	-0.786156	0.0177735	CENTER
A0A0U1RNP2_387 388	tr|A0A0U1RNP2|A0A0U1RNP2_MOUSE,sp|E9PYH6|SET1A_MOUSE	A0A0U1RNP2	387 388	0.89	PSEISEASEEKRPRPSTPAEEDEDDPEREKE SEISEASEEKRPRPSTPAEEDEDDPEREKEA	S	T	P	A	4	2	2	-0.342415	-0.422805	NA	NA	NA	-0.641729	-0.194382	NA	STYX	-0.38261	0.0214034	-0.418056	0.244379	CENTER
A0A0U1RNP2_567	tr|A0A0U1RNP2|A0A0U1RNP2_MOUSE,sp|E9PYH6|SET1A_MOUSE	A0A0U1RNP2	567	0.999	LPAPDEKPETDGLVDSPVMPLSEKETLPTQP	S	P	V	M	5	2	3	0.945442	0.372072	NA	NA	NA	-0.630482	-0.345472	0.265308	STYX	0.658757	0.03112	-0.236882	0.433435	CENTER
A0A0U1RNP2_616 617	tr|A0A0U1RNP2|A0A0U1RNP2_MOUSE,sp|E9PYH6|SET1A_MOUSE	A0A0U1RNP2	616 617	0.897	PAGPPDAAPRLDERPSSPIPLLPPPKKRRKT AGPPDAAPRLDERPSSPIPLLPPPKKRRKTV	S	S	P	I	8	5	3	0.222527	-0.257419	-0.201646	-0.0714289	-0.206645	-0.182122	-0.418073	-0.411625	STYX	-0.102922	0.0717183	-0.337273	0.213863	CENTER
A0A0U1RNP2_617	tr|A0A0U1RNP2|A0A0U1RNP2_MOUSE,sp|E9PYH6|SET1A_MOUSE	A0A0U1RNP2	617	0.99	AGPPDAAPRLDERPSSPIPLLPPPKKRRKTV	S	P	I	P	8	5	3	0.373155	0.0650314	-0.320582	-0.207088	-0.26174	-0.29958	-0.495718	-0.608596	STYX	-0.0702449	0.20396	-0.467964	0.101257	CENTER
A0A140LI88_63	tr|A0A140LI88|A0A140LI88_MOUSE	A0A140LI88	63	1	FCFHSGVDGMQKGIHSPEIQLGLKLRKDSQE	S	P	E	I	7	4	3	1.04378	-0.0458775	NA	-0.0860302	-0.0171736	0.359593	0.366684	0.047218	STYX	0.223675	0.922655	0.257832	0.335533	CENTER
A0A140LIQ5_96 97	tr|A0A140LIQ5|A0A140LIQ5_MOUSE	A0A140LIQ5	96 97	0.898	EDCEENLPENLKRFNSSPLALPRLTKRRRSS DCEENLPENLKRFNSSPLALPRLTKRRRSSS	S	S	P	L	8	5	3	1.52488	-0.511803	0.226756	-0.142516	-0.224984	0.11541	-0.0215835	0.158097	STYX	0.174467	0.493727	0.0839743	0.712452	CENTER
A0A140LIQ5_97	tr|A0A140LIQ5|A0A140LIQ5_MOUSE	A0A140LIQ5	97	0.995	DCEENLPENLKRFNSSPLALPRLTKRRRSSS	S	P	L	A	8	5	3	0.732309	-0.419009	0.0528601	-0.0273753	-0.170821	0.321188	-0.05838	0.228535	STYX	0.0335928	0.474451	0.163781	0.522178	CENTER
A0A140LIU8_203	tr|A0A140LIU8|A0A140LIU8_MOUSE	A0A140LIU8	203	0.999	SFLQEAGAAAAQARLSDEEGAEGEGGTGEAG	S	D	E	E	7	4	3	0.0870821	0.533309	NA	0.815471	0.0926991	0.056335	0.0639638	0.334596	STYX	0.38214	0.0426182	0.151632	0.545738	CENTER
A0A140LIX9_569	tr|A0A140LIX9|A0A140LIX9_MOUSE	A0A140LIX9	569	0.998	ALRWEEKKAQATSPGTPSQDERVLELKRKME	T	P	S	Q	7	5	2	-0.434918	-0.463365	0.956183	0.11248	-0.381036	0.878565	0.94167	NA	STYX	-0.0421311	0.222929	0.910118	0.0436623	NR
A0A140LIY9_1474	tr|A0A140LIY9|A0A140LIY9_MOUSE	A0A140LIY9	1474	0.984	GIFQPATLPRGFRQPTPTQPDFVTPSIDLRF	T	P	T	Q	6	4	2	NA	0.0808726	0.347839	0.00590419	-0.257506	-0.0856852	NA	0.645991	STYX	0.0442774	0.989052	0.280153	0.479944	CENTER
A0A140LIY9_507	tr|A0A140LIY9|A0A140LIY9_MOUSE	A0A140LIY9	507	0.991	DQRGLVTPGTDQRAFSPSLSDERTLVSLGLM	S	P	S	L	8	5	3	0.240253	-0.635761	0.0497261	0.0194711	-0.0921137	0.863827	0.475929	0.740771	STYX	-0.0836848	0.515485	0.693509	0.0364094	CENTER
A0A140LIY9_575	tr|A0A140LIY9|A0A140LIY9_MOUSE	A0A140LIY9	575	1	LDRRSSVPVGTERRASLQALAEKRSSVPIEV	S	L	Q	A	8	5	3	-0.521524	-0.441111	0.243603	-0.0525269	0.389197	0.602545	0.352995	0.474974	STYX	-0.0764724	0.51088	0.476838	0.103024	CENTER
A0A1B0GR13_610	tr|A0A1B0GR13|A0A1B0GR13_MOUSE	A0A1B0GR13	610	1	SRERLPFPPCEPFRASPKPVHVCKCKESPSP	S	P	K	P	6	3	3	-0.441593	-0.196745	0.356703	NA	NA	1.4137	1.37061	1.19533	STYX	-0.0938782	0.332689	1.32655	0.00483907	NR
A0A1B0GR91_118	tr|A0A1B0GR91|A0A1B0GR91_MOUSE	A0A1B0GR91	118	0.998	QHIANREAWGIHGHQSPPSCAAEPISIWGDS	S	P	P	S	6	3	3	0.19994	0.012182	0.188453	NA	NA	-0.0424479	-0.333694	0.22385	STYX	0.133525	0.305204	-0.0507639	0.869421	CENTER
A0A1B0GR91_192	tr|A0A1B0GR91|A0A1B0GR91_MOUSE	A0A1B0GR91	192	0.988	MSRVVTSDDIQCPSSSPESSDEFSETQMMRV	S	P	E	S	5	3	2	0.658086	0.363015	NA	0.513734	NA	NA	0.0935239	0.0283323	STYX	0.511612	0.00937299	0.0609281	0.820761	CENTER
A0A1B0GRJ3_146	tr|A0A1B0GRJ3|A0A1B0GRJ3_MOUSE	A0A1B0GRJ3	146	0.998	LMKSKADMQDRKAQKSPLSLWKAKSEPETSD	S	P	L	S	7	4	3	0.275731	-0.545486	NA	0.291539	-0.0406031	1.28171	0.796439	1.27928	STYX	-0.00470457	0.917231	1.11914	0.00847579	NR
A0A1B0GRY3_1304	tr|A0A1B0GRY3|A0A1B0GRY3_MOUSE	A0A1B0GRY3	1304	0.999	IVSGEEEAESDLNNASGDELNRCYSSESNQS	S	G	D	E	4	2	2	0.0719743	-0.279415	NA	NA	NA	NA	-0.29801	0.132987	STYX	-0.10372	0.389156	-0.0825118	0.820379	CENTER
A0A1B0GRY3_280	tr|A0A1B0GRY3|A0A1B0GRY3_MOUSE,tr|A5H0M4|A5H0M4_MOUSE	A0A1B0GRY3	280	0.998	ARSNSESKPPNCAGNSPAAIDKAFGNRGKRT	S	P	A	A	6	4	2	-0.690028	NA	-0.244817	-0.0103631	0.172159	NA	0.700523	0.295356	STYX	-0.193262	0.188752	0.49794	0.182387	CENTER
A0A1B0GS18_395	tr|A0A1B0GS18|A0A1B0GS18_MOUSE,sp|G3UW99|TEX54_MOUSE	A0A1B0GS18	395	0.991	RSNESLLITVLWRRLSMFSRRESSRSGKQDN	S	M	F	S	6	4	2	0.107452	-0.619796	NA	1.04987	-0.806562	0.912209	NA	1.14533	STYX	-0.0672602	0.546677	1.02877	0.0342834	NR
A0A1B0GSJ4_103	tr|A0A1B0GSJ4|A0A1B0GSJ4_MOUSE	A0A1B0GSJ4	103	0.999	CSPVTVKIAPPEGRGSPLASLEQGARIAEHP	S	P	L	A	8	5	3	0.790232	-0.00351322	0.0360821	0.0697579	-0.000475393	0.44344	0.456522	0.813605	STYX	0.178417	0.506563	0.571189	0.0672114	CENTER
A0A1B0GSX1_139	tr|A0A1B0GSX1|A0A1B0GSX1_MOUSE	A0A1B0GSX1	139	1	PTGAQQDGQQSCRVCSKPPILPGRGITNDCQ	S	K	P	P	7	5	2	0.277964	-0.582271	0.883613	-0.0703803	-0.2832	0.631208	0.71202	NA	STYX	0.045145	0.608968	0.671614	0.0880683	CENTER
A0A1B0GT05_9	tr|A0A1B0GT05|A0A1B0GT05_MOUSE,sp|O35153|BET1L_MOUSE	A0A1B0GT05	9	0.991	_______MADWTRAQSSGAVEDILDRENKRM	S	S	G	A	6	3	3	-0.11855	-0.0239519	0.187568	NA	NA	-0.166907	-0.321419	-0.593739	STYX	0.0150221	0.74166	-0.360688	0.200715	CENTER
A0A1B0GT05_9 10	tr|A0A1B0GT05|A0A1B0GT05_MOUSE,sp|O35153|BET1L_MOUSE	A0A1B0GT05	9 10	0.887	_______MADWTRAQSSGAVEDILDRENKRM ______MADWTRAQSSGAVEDILDRENKRMA	S	S	G	A	8	5	3	-0.132147	0.192789	0.0226187	0.109668	-0.047179	-0.0684505	-0.270586	0.244206	STYX	0.0291499	0.888442	-0.0316103	0.918158	CENTER
A0A1B0GT45_254	tr|A0A1B0GT45|A0A1B0GT45_MOUSE	A0A1B0GT45	254	0.981	FIPAFSEVSKPAKAPSPTSPCQPAPNPPYAP	S	P	T	S	5	3	2	0.126711	-0.145766	0.0750494	NA	NA	0.111892	0.0833494	NA	STYX	0.0186649	0.89887	0.0976205	0.725323	CENTER
A0A1B0GT45_317	tr|A0A1B0GT45|A0A1B0GT45_MOUSE	A0A1B0GT45	317	0.993	ARDLAHNPKQNSACTSPQTPPKSPTYAPFQS	S	P	Q	T	4	2	2	-0.324025	0.689527	NA	NA	NA	0.927482	0.395843	NA	STYX	0.182751	0.980729	0.661663	0.109297	CENTER
A0A1B0GT45_800	tr|A0A1B0GT45|A0A1B0GT45_MOUSE	A0A1B0GT45	800	0.998	CLQKNLDLSQDSGLRSPAAIQDAGVLRSHSA	S	P	A	A	7	4	3	NA	0.374825	0.403969	0.151828	0.111387	0.231374	0.304982	-0.141157	STYX	0.260502	0.0380704	0.131733	0.605916	CENTER
A0A1B0GT45_929	tr|A0A1B0GT45|A0A1B0GT45_MOUSE	A0A1B0GT45	929	0.989	EDSEVNKISGLTQESSTHKSLGLVQTSCLHK	S	T	H	K	4	2	2	-0.21092	-0.296276	NA	NA	NA	NA	0.280193	0.231251	STYX	-0.253598	0.0358715	0.255722	0.415091	CENTER
A0A1D5RLD8_182	tr|A0A1D5RLD8|A0A1D5RLD8_MOUSE,sp|P16858|G3P_MOUSE,tr|S4R1W1|S4R1W1_MOUSE,tr|V9GX06|V9GX06_MOUSE,tr|V9GXA7|V9GXA7_MOUSE	A0A1D5RLD8	182	0.997	GIVEGLMTTVHAITATQKTVDGPSGKLWRDG	T	Q	K	T	4	2	2	NA	0.0578823	NA	NA	-0.282422	NA	-0.813697	-0.179574	STYQ	-0.11227	0.350376	-0.496635	0.203246	CENTER
A0A1D5RLD8_208	tr|A0A1D5RLD8|A0A1D5RLD8_MOUSE,sp|P16858|G3P_MOUSE,tr|S4R1W1|S4R1W1_MOUSE	A0A1D5RLD8	208	0.971	LWRDGRGAAQNIIPASTGAAKAVGKVIPELN	S	T	G	A	5	3	2	NA	0.144696	NA	0.0304873	0.19828	NA	-0.657328	-1.05827	STYX	0.124488	0.320329	-0.857797	0.0463243	NR
A0A1D5RLD8_208 209	tr|A0A1D5RLD8|A0A1D5RLD8_MOUSE,sp|P16858|G3P_MOUSE,tr|S4R1W1|S4R1W1_MOUSE	A0A1D5RLD8	208 209	0.875	LWRDGRGAAQNIIPASTGAAKAVGKVIPELN WRDGRGAAQNIIPASTGAAKAVGKVIPELNG	S	T	G	A	8	5	3	0.0381049	0.108922	-0.166604	0.145658	0.187401	-0.505193	-0.37724	-0.688128	STYX	0.0626964	0.652165	-0.523521	0.0723412	CENTER
A0A1D5RLM8_2012	tr|A0A1D5RLM8|A0A1D5RLM8_MOUSE	A0A1D5RLM8	2012	0.986	IDLIDIKSILHLKSISGESINLKSISTDDIR	S	G	E	S	5	3	2	NA	NA	0.20271	0.0441964	-0.258017	NA	0.271178	0.442879	STYX	-0.00370376	0.816811	0.357029	0.288122	CENTER
A0A1D5RLM8_431	tr|A0A1D5RLM8|A0A1D5RLM8_MOUSE,tr|A0A1D5RLM8|A0A1D5RLM8_MOUSE,tr|A0A1D5RLM8|A0A1D5RLM8_MOUSE,tr|A0A1D5RLM8|A0A1D5RLM8_MOUSE,tr|A0A1D5RLM8|A0A1D5RLM8_MOUSE,tr|A0A1D5RLM8|A0A1D5RLM8_MOUSE,tr|A0A1D5RLM8|A0A1D5RLM8_MOUSE,tr|A0A1D5RLM8|A0A1D5RLM8_MOUSE	A0A1D5RLM8	431	0.997	SLSKLPDRRDSSLKKSPDRSDSSLKKSPDRR	S	P	D	R	4	2	2	-0.390483	0.24973	NA	NA	NA	NA	1.66059	1.53497	STYX	-0.0703769	0.729503	1.59778	0.0173717	NR
A0A1D5RLM8_5406	tr|A0A1D5RLM8|A0A1D5RLM8_MOUSE,sp|Q80X60|EFCB3_MOUSE	A0A1D5RLM8	5406	0.995	LKAPVFHKRDKDLRGSFSDHLKHKESKLSPA	S	F	S	D	5	2	3	0.411277	-0.584988	NA	NA	NA	0.582858	1.44381	1.2737	STYX	-0.0868555	0.854408	1.10012	0.0116758	NR
A0A1D5RLM8_5408	tr|A0A1D5RLM8|A0A1D5RLM8_MOUSE,sp|Q80X60|EFCB3_MOUSE	A0A1D5RLM8	5408	0.997	APVFHKRDKDLRGSFSDHLKHKESKLSPAQL	S	D	H	L	7	4	3	0.797699	-0.59641	0.316382	NA	-0.772424	1.10536	0.904678	1.20294	STYX	-0.0636883	0.811516	1.07099	0.00853268	NR
A0A1D5RM53_102	tr|A0A1D5RM53|A0A1D5RM53_MOUSE	A0A1D5RM53	102	1	RSDKNRTRTKAHLLPSPREKGPLPNSLTTGG	S	P	R	E	7	5	2	0.963199	-0.348517	0.185381	0.256708	-0.612761	-0.161638	NA	0.701811	STYX	0.088802	0.840565	0.270086	0.528214	CENTER
A0A1D5RM53_32	tr|A0A1D5RM53|A0A1D5RM53_MOUSE	A0A1D5RM53	32	0.999	SQAAASLGGGQKLSCSEEFLTRISTELTDEA	S	E	E	F	8	5	3	0.140699	-0.494792	-0.0395175	0.081122	-0.12758	1.27715	0.667884	1.51216	STYX	-0.0880135	0.314337	1.1524	0.00964283	NR
A0A1D5RM53_73	tr|A0A1D5RM53|A0A1D5RM53_MOUSE	A0A1D5RM53	73	0.997	LPNKEKNTKDQGTQISRHVFFTKTRGTDTRS	S	R	H	V	7	5	2	-0.546362	-0.0427932	-0.285281	0.0322614	0.186388	NA	1.10013	1.41027	STYX	-0.131157	0.201025	1.2552	0.0237492	NR
A0A1D5RMA1_196	tr|A0A1D5RMA1|A0A1D5RMA1_MOUSE	A0A1D5RMA1	196	0.999	GFVPYYRSPEERLRASPVVSSSVLGSSWE__	S	P	V	V	7	4	3	0.505127	-0.240833	NA	0.347817	-0.359195	0.261038	0.140644	0.275033	STYX	0.0632288	0.9142	0.225572	0.374242	CENTER
A0A1D5RMD1_1009	tr|A0A1D5RMD1|A0A1D5RMD1_MOUSE	A0A1D5RMD1	1009	1	ALSWGELGISLSRALSRGELRPELNKATQGK	S	R	G	E	8	5	3	-0.495825	-0.639753	0.876984	-0.0266011	-0.603702	1.10216	0.236416	0.254312	STYX	-0.17778	0.0830282	0.530963	0.125335	CENTER
A0A1D5RMD1_1349	tr|A0A1D5RMD1|A0A1D5RMD1_MOUSE	A0A1D5RMD1	1349	0.995	GQGISGQPVSRWASASQQNTLLSQQHRACTI	S	Q	Q	N	5	3	2	-0.241968	NA	0.0494196	NA	0.144438	NA	0.0599313	-0.281295	STYQ	-0.0160367	0.737823	-0.110682	0.748415	CENTER
A0A1D5RMD1_170	tr|A0A1D5RMD1|A0A1D5RMD1_MOUSE	A0A1D5RMD1	170	0.999	EDQPPVMVTKETQFPSFDNLVPSQATAGPCA	S	F	D	N	8	5	3	-0.0763662	0.244447	0.454681	0.700449	-0.0648222	0.227036	0.166389	0.407925	STYX	0.251678	0.234948	0.267116	0.307037	CENTER
A0A1D5RMD1_229	tr|A0A1D5RMD1|A0A1D5RMD1_MOUSE	A0A1D5RMD1	229	1	KTFRSSCLMRHLEGDSLKIRHVASKTIKVGA	S	L	K	I	7	4	3	NA	-0.589098	0.254916	0.193244	-0.301503	0.719736	1.66694	1.01608	STYX	-0.110611	0.569321	1.13425	0.0102626	NR
A0A1D5RMD1_317 318	tr|A0A1D5RMD1|A0A1D5RMD1_MOUSE	A0A1D5RMD1	317 318	0.898	ATMSTAPRSAPQARPTSPATVMKMQATTSPT TMSTAPRSAPQARPTSPATVMKMQATTSPTS	T	S	P	A	8	5	3	-0.309293	-0.339127	0.105925	-0.0838104	0.161457	1.32455	0.45667	0.0967751	STYX	-0.0929698	0.229484	0.625999	0.106952	CENTER
A0A1D5RMD1_318	tr|A0A1D5RMD1|A0A1D5RMD1_MOUSE	A0A1D5RMD1	318	0.992	TMSTAPRSAPQARPTSPATVMKMQATTSPTS	S	P	A	T	8	5	3	-0.367218	-0.135574	0.2017	-0.0791637	0.182878	1.04247	0.262035	0.2516	STYX	-0.0394756	0.441276	0.518701	0.1235	CENTER
A0A1D5RMD1_429 430	tr|A0A1D5RMD1|A0A1D5RMD1_MOUSE	A0A1D5RMD1	429 430	0.899	QAQTYTVSTSSKTSPSSPTVKPSPQTRLAAM AQTYTVSTSSKTSPSSPTVKPSPQTRLAAML	S	S	P	T	8	5	3	-0.517302	0.000665194	-0.192695	0.112989	0.138294	0.61302	0.880516	0.247011	STYX	-0.0916098	0.370766	0.580182	0.0736887	CENTER
A0A1D5RMD1_430	tr|A0A1D5RMD1|A0A1D5RMD1_MOUSE	A0A1D5RMD1	430	0.996	AQTYTVSTSSKTSPSSPTVKPSPQTRLAAML	S	P	T	V	7	4	3	-0.49169	0.0291603	-0.142677	-0.0428384	NA	1.15274	0.939266	0.114257	STYX	-0.162011	0.0845506	0.735422	0.0566064	CENTER
A0A1D5RMD1_489	tr|A0A1D5RMD1|A0A1D5RMD1_MOUSE	A0A1D5RMD1	489	0.998	PRCSPQSPVVAGNTPSQVHLNSTRTKVTVST	S	Q	V	H	8	5	3	-0.52827	0.0730829	0.67189	0.287086	0.310337	0.395245	0.302362	-0.0147453	STYQ	0.162825	0.21647	0.227621	0.396415	CENTER
A0A1D5RMD1_515	tr|A0A1D5RMD1|A0A1D5RMD1_MOUSE	A0A1D5RMD1	515	0.995	VTVSTKQATTVVKVNSQSYLGRCGSQGNLDT	S	Q	S	Y	8	5	3	-0.342218	-0.646279	0.683728	-0.144225	0.396639	0.788319	0.598725	0.189246	STYQ	-0.0104712	0.510348	0.52543	0.094825	CENTER
A0A1D5RMD1_524	tr|A0A1D5RMD1|A0A1D5RMD1_MOUSE	A0A1D5RMD1	524	0.999	TVVKVNSQSYLGRCGSQGNLDTIVPKPPATY	S	Q	G	N	8	5	3	-0.0264893	-0.00230895	0.285425	-0.278218	-0.240723	0.637229	1.16264	0.758711	STYQ	-0.0524629	0.26967	0.852861	0.0197819	NR
A0A1D5RMD1_622	tr|A0A1D5RMD1|A0A1D5RMD1_MOUSE	A0A1D5RMD1	622	0.98	PVTLTQAQLAVPLTKSSSQIQPPPCHARTQP	S	S	S	Q	4	2	2	-0.741045	1.30537	NA	NA	NA	0.467663	0.322196	NA	STYX	0.282165	0.988829	0.39493	0.246509	CENTER
A0A1D5RMD1_622 623 624	tr|A0A1D5RMD1|A0A1D5RMD1_MOUSE	A0A1D5RMD1	622 623 624	0.891	PVTLTQAQLAVPLTKSSSQIQPPPCHARTQP VTLTQAQLAVPLTKSSSQIQPPPCHARTQPT TLTQAQLAVPLTKSSSQIQPPPCHARTQPTS	S	S	S	Q	8	5	3	-0.638009	0.60726	0.0683802	-0.0336849	0.120427	0.486613	0.444151	-0.192996	STYX	0.0248747	0.904255	0.245923	0.406242	CENTER
A0A1D5RMD1_699	tr|A0A1D5RMD1|A0A1D5RMD1_MOUSE	A0A1D5RMD1	699	0.993	LTAQLQPACEQARSVSRDHLTRSCPASASLQ	S	R	D	H	8	5	3	-0.50635	-1.36262	1.58248	-0.481682	1.17682	1.3268	1.20399	0.453976	STYX	0.0817315	0.450421	0.994921	0.0170662	NR
A0A1D5RMD1_748 749 750	tr|A0A1D5RMD1|A0A1D5RMD1_MOUSE	A0A1D5RMD1	748 749 750	0.881	PTSAPQHHMASLLAKSSSQLHPPAEHAKTMN TSAPQHHMASLLAKSSSQLHPPAEHAKTMNT SAPQHHMASLLAKSSSQLHPPAEHAKTMNTK	S	S	S	Q	6	4	2	-0.494119	-0.206634	0.492805	NA	-0.224444	NA	0.507436	0.153774	STYX	-0.108098	0.133044	0.330605	0.33341	CENTER
A0A1D5RMD1_784	tr|A0A1D5RMD1|A0A1D5RMD1_MOUSE	A0A1D5RMD1	784	0.999	AACQVCPSTKLSKAPSLAQLITCLAKVPSQA	S	L	A	Q	5	2	3	0.262165	-0.359947	NA	NA	NA	0.558573	0.0875144	0.461572	STYX	-0.0488912	0.756994	0.36922	0.200762	CENTER
A0A1D5RMD1_797	tr|A0A1D5RMD1|A0A1D5RMD1_MOUSE	A0A1D5RMD1	797	0.999	APSLAQLITCLAKVPSQAQLATETAKCLLAA	S	Q	A	Q	8	5	3	-0.18235	-0.44311	0.825136	-0.0481168	-0.0219731	0.829489	0.707843	0.375953	STYQ	0.025917	0.287727	0.637762	0.0491939	CENTER
A0A1D5RMD1_824	tr|A0A1D5RMD1|A0A1D5RMD1_MOUSE	A0A1D5RMD1	824	0.996	LLAAHPTTDHRSKTQSQTFLSSSKASVQLWQ	S	Q	T	F	8	5	3	-0.426988	-0.729382	0.856569	-0.0687948	0.199347	0.645178	0.616981	0.128953	STYQ	-0.0338497	0.498512	0.463704	0.128463	CENTER
A0A1D5RMD1_910	tr|A0A1D5RMD1|A0A1D5RMD1_MOUSE	A0A1D5RMD1	910	0.998	PVCNAESWGDSGRAQTPPPSPVPNQAVPCHD	T	P	P	P	5	2	3	NA	0.201869	NA	NA	-0.24991	0.0904726	-0.227182	-0.374818	STYX	-0.0240203	0.72434	-0.170509	0.534332	CENTER
A0A1L1SR47_721	tr|A0A1L1SR47|A0A1L1SR47_MOUSE	A0A1L1SR47	721	0.999	GIPFRSTPSSKLPLGSGQLQSTKEASKDILQ	S	G	Q	L	4	2	2	NA	0.101524	0.670302	NA	NA	0.763256	0.440433	NA	STYX	0.385913	0.135065	0.601844	0.120333	CENTER
A0A1L1SU27_705 706	tr|A0A1L1SU27|A0A1L1SU27_MOUSE	A0A1L1SU27	705 706	0.894	RRAPAVPTVPPLRKAYSFDRNLGRHLQDVSS RAPAVPTVPPLRKAYSFDRNLGRHLQDVSSR	Y	S	F	D	7	5	2	1.77532	-0.231691	-0.216856	-0.15323	0.348347	1.13621	NA	-0.944502	STYX	0.304377	0.637084	0.0958564	0.97002	CENTER
A0A1L1SU27_706	tr|A0A1L1SU27|A0A1L1SU27_MOUSE	A0A1L1SU27	706	0.995	RAPAVPTVPPLRKAYSFDRNLGRHLQDVSSR	S	F	D	R	7	4	3	NA	-0.515984	-0.314306	-0.0296728	0.0355688	0.907959	0.72223	0.183909	STYX	-0.206099	0.0652815	0.604699	0.0710767	CENTER
A0A1L1SU27_744	tr|A0A1L1SU27|A0A1L1SU27_MOUSE	A0A1L1SU27	744	0.989	TDCHRPEARGGVRPRSSPPVPLSGSSDFRSP	S	S	P	P	8	5	3	0.169588	0.0109903	-0.0323983	0.0716066	-0.28632	0.75584	0.443951	0.524169	STYX	-0.0133066	0.647395	0.574654	0.06375	CENTER
A0A1L1SU27_744 745	tr|A0A1L1SU27|A0A1L1SU27_MOUSE	A0A1L1SU27	744 745	0.89	TDCHRPEARGGVRPRSSPPVPLSGSSDFRSP DCHRPEARGGVRPRSSPPVPLSGSSDFRSPN	S	S	P	P	8	5	3	0.40347	0.0904847	-0.0267705	0.166732	-0.097259	0.176951	0.13084	0.703296	STYX	0.107331	0.560447	0.337029	0.250494	CENTER
A0A1L1SU27_745	tr|A0A1L1SU27|A0A1L1SU27_MOUSE	A0A1L1SU27	745	0.985	DCHRPEARGGVRPRSSPPVPLSGSSDFRSPN	S	P	P	V	8	5	3	0.514325	0.136689	-0.141964	0.131994	-0.240345	0.140974	0.359614	0.382808	STYX	0.0801398	0.910493	0.294466	0.270424	CENTER
A0A1W2P6Q8_424	tr|A0A1W2P6Q8|A0A1W2P6Q8_MOUSE,tr|A0A1W2P7H4|A0A1W2P7H4_MOUSE,tr|A0A1W2P7S8|A0A1W2P7S8_MOUSE,tr|A0A1W2P7Z8|A0A1W2P7Z8_MOUSE,tr|A0A1W2P855|A0A1W2P855_MOUSE,sp|Q6A068|CDC5L_MOUSE	A0A1W2P6Q8	424	1	LSTPLRTPSNGAEGLTPRSGTTPKPVTNATP	T	P	R	S	8	5	3	0.599165	0.15335	-0.103956	-0.196322	-0.579484	0.0642722	0.0732212	0.000585751	STYX	-0.0254495	0.444292	0.0460264	0.825026	CENTER
A0A1W2P6Q8_429 430	tr|A0A1W2P6Q8|A0A1W2P6Q8_MOUSE,tr|A0A1W2P7H4|A0A1W2P7H4_MOUSE,tr|A0A1W2P7S8|A0A1W2P7S8_MOUSE,tr|A0A1W2P7Z8|A0A1W2P7Z8_MOUSE,tr|A0A1W2P855|A0A1W2P855_MOUSE,sp|Q6A068|CDC5L_MOUSE	A0A1W2P6Q8	429 430	0.899	RTPSNGAEGLTPRSGTTPKPVTNATPGRTPL TPSNGAEGLTPRSGTTPKPVTNATPGRTPLR	T	T	P	K	5	3	2	NA	0.00339978	-0.0445084	NA	-0.381921	0.12872	NA	-0.0201929	STYX	-0.14101	0.160798	0.0542636	0.839019	CENTER
A0A1W2P6Q8_430	tr|A0A1W2P6Q8|A0A1W2P6Q8_MOUSE,tr|A0A1W2P7H4|A0A1W2P7H4_MOUSE,tr|A0A1W2P7S8|A0A1W2P7S8_MOUSE,tr|A0A1W2P7Z8|A0A1W2P7Z8_MOUSE,tr|A0A1W2P855|A0A1W2P855_MOUSE,sp|Q6A068|CDC5L_MOUSE	A0A1W2P6Q8	430	0.986	TPSNGAEGLTPRSGTTPKPVTNATPGRTPLR	T	P	K	P	5	2	3	0.131972	-0.0797625	NA	NA	NA	0.0572274	-0.0124758	0.314451	STYX	0.0261049	0.904258	0.119734	0.634122	CENTER
A0A1W2P6U8_1122	tr|A0A1W2P6U8|A0A1W2P6U8_MOUSE	A0A1W2P6U8	1122	0.998	VDPEKAKPEPGLQSLSPKESVEGIQIPNVKS	S	P	K	E	7	4	3	0.0247816	-0.18942	0.689609	NA	-0.334629	1.46523	0.767313	0.705276	STYX	0.0475852	0.491837	0.979273	0.0149462	NR
A0A1W2P6U8_1404	tr|A0A1W2P6U8|A0A1W2P6U8_MOUSE	A0A1W2P6U8	1404	1	GPWLQDVKFLDEIPGTPPQGMKTPELNSGPH	T	P	P	Q	4	2	2	0.462007	-0.458479	NA	NA	NA	0.462658	NA	0.659151	STYX	0.00176395	0.900627	0.560905	0.133957	CENTER
A0A1W2P6U8_1621	tr|A0A1W2P6U8|A0A1W2P6U8_MOUSE	A0A1W2P6U8	1621	0.995	LTVEECLKRIKSTVVSPSNSLKRDIKSVKLI	S	P	S	N	7	5	2	-0.345975	-0.555908	0.170003	0.133298	0.151351	0.869462	NA	0.341002	STYX	-0.0894461	0.663026	0.605232	0.131844	CENTER
A0A1W2P6U8_2124	tr|A0A1W2P6U8|A0A1W2P6U8_MOUSE	A0A1W2P6U8	2124	0.998	QSSEAKSGILGQGSQSPEPQWQSAKCSDLIP	S	P	E	P	7	5	2	-0.0683239	0.0473051	0.217049	-0.0250151	0.0645932	NA	-0.0860888	0.383473	STYX	0.0471216	0.918873	0.148692	0.657129	CENTER
A0A1W2P6U8_2153	tr|A0A1W2P6U8|A0A1W2P6U8_MOUSE	A0A1W2P6U8	2153	0.973	IPETKSQNMKFKLSSSLPLKSKPFTDLIMET	S	L	P	L	4	2	2	0.288556	-0.880923	NA	NA	NA	NA	0.202579	1.00563	STYX	-0.296184	0.734309	0.604104	0.1641	CENTER
A0A1W2P6U8_3263	tr|A0A1W2P6U8|A0A1W2P6U8_MOUSE	A0A1W2P6U8	3263	0.999	LLAGPALTSVKFSNLSLKSQQQNTKSLILTS	S	L	K	S	6	3	3	NA	-1.09254	NA	0.179661	0.17776	1.2522	0.792392	1.68778	STYX	-0.245041	0.966991	1.24412	0.00755025	NR
A0A1W2P6U8_3579	tr|A0A1W2P6U8|A0A1W2P6U8_MOUSE	A0A1W2P6U8	3579	0.987	NSKNLASTLWLQKESSELSCKQTSQVEGNTD	S	E	L	S	4	2	2	-0.0278645	0.497668	NA	NA	NA	0.531863	NA	0.871865	STYX	0.234902	0.455257	0.701864	0.0865836	CENTER
A0A1W2P6U8_4154	tr|A0A1W2P6U8|A0A1W2P6U8_MOUSE	A0A1W2P6U8	4154	0.994	YSGTRLGVKKTSSKLSDILQKVTEHVSVSCS	S	D	I	L	5	3	2	NA	0.0544325	NA	-0.543013	-0.2454	NA	0.835445	0.755262	STYX	-0.24466	0.0853688	0.795353	0.0592976	CENTER
A0A1W2P6U8_4201	tr|A0A1W2P6U8|A0A1W2P6U8_MOUSE	A0A1W2P6U8	4201	0.992	LYTREDSVSRKQSKISPCGSPTRTFESQHSL	S	P	C	G	8	5	3	0.07232	-0.151724	0.328777	-0.437531	0.0836757	0.463631	0.558356	0.610638	STYX	-0.0208966	0.696639	0.544208	0.0712442	CENTER
A0A1W2P6U8_4771	tr|A0A1W2P6U8|A0A1W2P6U8_MOUSE,sp|Q8CAF4|NHSL1_MOUSE,sp|Q9D2D7|ZN687_MOUSE	A0A1W2P6U8	4771	0.996	PGSPSRRSPRSPSRRSPGSLSRRSPRRPSKR	S	P	G	S	7	5	2	-0.444166	-0.556974	0.680712	-0.176612	0.186439	1.11571	NA	0.830498	STYX	-0.0621202	0.341412	0.973104	0.0391274	NR
A0A1W2P6U8_4903	tr|A0A1W2P6U8|A0A1W2P6U8_MOUSE	A0A1W2P6U8	4903	0.984	SVKKSLHSFSERSQQSPSSLRCLSPSKRSHV	S	P	S	S	7	5	2	-0.284023	-0.455401	0.24449	-0.357823	0.387463	NA	0.155252	0.888525	STYX	-0.0930586	0.307366	0.521888	0.20564	CENTER
A0A1W2P6U8_4932	tr|A0A1W2P6U8|A0A1W2P6U8_MOUSE	A0A1W2P6U8	4932	0.992	HVSFMRRSLGSYSERSIPSVWKEHSCRLSQY	S	I	P	S	5	2	3	0.526801	-0.828699	NA	NA	NA	0.918632	0.493207	1.76458	STYX	-0.150949	0.900368	1.0588	0.0177992	NR
A0A1W2P6U8_4979	tr|A0A1W2P6U8|A0A1W2P6U8_MOUSE	A0A1W2P6U8	4979	0.999	SPAVPGLTAFTSSCQSLEKLTTY________	S	L	E	K	5	2	3	0.0954373	-0.0496456	NA	NA	NA	0.566342	0.463917	1.34139	STYX	0.0228959	0.906723	0.79055	0.0357571	CENTER
A0A1W2P6U8_597	tr|A0A1W2P6U8|A0A1W2P6U8_MOUSE	A0A1W2P6U8	597	1	QPPQIPSKVPDSSRMSPEPLENALKVNSVVQ	S	P	E	P	5	2	3	0.218787	-0.461644	NA	NA	NA	0.896429	0.886531	1.30443	STYX	-0.121429	0.660922	1.02913	0.0102113	NR
A0A1W2P884_158	tr|A0A1W2P884|A0A1W2P884_MOUSE	A0A1W2P884	158	0.989	SSLDMKDFRPLRKWSSLSKLTAPDTRNHSGI	S	L	S	K	4	2	2	NA	-0.477995	NA	NA	0.0549962	NA	1.21843	1.64653	STYX	-0.211499	0.294788	1.43248	0.0203169	NR
A0A1W2P884_351	tr|A0A1W2P884|A0A1W2P884_MOUSE	A0A1W2P884	351	0.995	ETPMQVLTGSSRQSYSPPGFQDFSKWESVLK	S	P	P	G	6	3	3	0.244639	0.0983992	-0.0299026	NA	NA	0.635294	0.748645	1.30387	STYX	0.104379	0.512317	0.895937	0.0186668	NR
A0A1W2P884_775	tr|A0A1W2P884|A0A1W2P884_MOUSE	A0A1W2P884	775	1	ETENDHSPETLTKKLSDVCQLRRDIDELRTT	S	D	V	C	7	5	2	0.08292	-0.352567	-0.0481086	0.0874261	-0.14101	NA	0.588953	1.40754	STYX	-0.0742677	0.243338	0.998244	0.0511162	NR
A0A1Y7VIU7_67	tr|A0A1Y7VIU7|A0A1Y7VIU7_MOUSE,sp|Q8BPI1|KTU_MOUSE	A0A1Y7VIU7	67	0.948	PGDRSLPYSAFPGGDTESLCGDPGVQTNEEQ	T	E	S	L	5	2	3	0.415908	-0.176197	NA	NA	NA	0.254698	-0.0190748	0.260948	STYX	0.119856	0.926735	0.165524	0.513695	CENTER
A0A1Y7VN40_1012	tr|A0A1Y7VN40|A0A1Y7VN40_MOUSE	A0A1Y7VN40	1012	1	HQEFRYRGNGDKQQPSPAAQRAYYPDQDRSK	S	P	A	A	4	2	2	-0.636215	0.262518	NA	NA	NA	1.1627	NA	0.313936	STYX	-0.186849	0.709536	0.738317	0.110792	CENTER
A0A1Y7VNZ0_32	tr|A0A1Y7VNZ0|A0A1Y7VNZ0_MOUSE	A0A1Y7VNZ0	32	0.999	NIWKSRRRRGRSRHQSPALGQCDSSERYATG	S	P	A	L	5	3	2	-1.18575	0.164643	NA	-0.0681779	NA	-0.00811362	NA	-0.623133	STYX	-0.363093	0.338696	-0.315623	0.397232	CENTER
A0A286YCV9_1380	tr|A0A286YCV9|A0A286YCV9_MOUSE	A0A286YCV9	1380	0.996	KEQLTGKGKLSRRSISSPSMNRLSGSRQELS	S	S	P	S	7	5	2	-0.361733	-0.311795	0.0706492	0.432526	0.401802	NA	-1.1795	-0.4799	STYX	0.0462899	0.998223	-0.8297	0.0644858	CENTER
A0A286YCV9_1380 1381	tr|A0A286YCV9|A0A286YCV9_MOUSE	A0A286YCV9	1380 1381	0.896	KEQLTGKGKLSRRSISSPSMNRLSGSRQELS EQLTGKGKLSRRSISSPSMNRLSGSRQELSP	S	S	P	S	8	5	3	-0.111114	-0.247898	-0.0756037	0.16459	0.174379	-0.603228	-0.783898	-0.51916	STYX	-0.0191294	0.468458	-0.635429	0.0379423	CENTER
A0A286YCV9_1390	tr|A0A286YCV9|A0A286YCV9_MOUSE	A0A286YCV9	1390	0.932	SRRSISSPSMNRLSGSRQELSPSHSLGSNKG	S	R	Q	E	4	2	2	-0.168527	-0.778824	NA	NA	NA	NA	-0.182682	-1.04129	STYX	-0.473676	0.0337584	-0.611986	0.164398	CENTER
A0A286YCV9_1395	tr|A0A286YCV9|A0A286YCV9_MOUSE	A0A286YCV9	1395	0.985	SSPSMNRLSGSRQELSPSHSLGSNKGRWESQ	S	P	S	H	5	2	3	0.586418	-0.120085	NA	NA	NA	-0.0377854	-0.389784	-0.082574	STYX	0.233166	0.730242	-0.170048	0.537768	CENTER
A0A286YCV9_1409	tr|A0A286YCV9|A0A286YCV9_MOUSE	A0A286YCV9	1409	0.999	LSPSHSLGSNKGRWESQQDVSQTLVSRGIAP	S	Q	Q	D	8	5	3	0.0959824	-0.103158	0.317987	0.0990825	-0.0187984	-0.36973	-0.870844	-0.639379	STYQ	0.0782193	0.700549	-0.626651	0.0450474	CENTER
A0A286YCV9_1512	tr|A0A286YCV9|A0A286YCV9_MOUSE	A0A286YCV9	1512	0.996	FSDTWATRTEEAQQGSPGPSGALESMVKMAA	S	P	G	P	5	3	2	0.191478	0.304444	0.401817	NA	NA	-0.30884	NA	-0.474454	STYX	0.299247	0.0351727	-0.391647	0.243319	CENTER
A0A286YCV9_1657 1658	tr|A0A286YCV9|A0A286YCV9_MOUSE	A0A286YCV9	1657 1658	0.899	VPRAPLLSEPASAVPTSPFRIRKVRTSELKS PRAPLLSEPASAVPTSPFRIRKVRTSELKSF	T	S	P	F	8	5	3	0.319255	0.0484653	-0.0315538	0.111826	-0.276056	-0.202467	-0.155808	0.108707	STYX	0.0343871	0.994009	-0.0831894	0.767668	CENTER
A0A286YCV9_1658	tr|A0A286YCV9|A0A286YCV9_MOUSE	A0A286YCV9	1658	0.983	PRAPLLSEPASAVPTSPFRIRKVRTSELKSF	S	P	F	R	6	3	3	0.340173	-0.121301	NA	NA	-0.0992513	-0.037708	-0.0105155	0.135422	STYX	0.0398738	0.670454	0.029066	0.885445	CENTER
A0A286YCV9_1667 1668	tr|A0A286YCV9|A0A286YCV9_MOUSE	A0A286YCV9	1667 1668	0.892	ASAVPTSPFRIRKVRTSELKSFTGMLGGASS SAVPTSPFRIRKVRTSELKSFTGMLGGASSG	T	S	E	L	4	2	2	NA	-0.0236617	1.01592	NA	NA	0.526444	NA	-1.04047	STYX	0.496129	0.378248	-0.257011	0.697867	CENTER
A0A286YCV9_1682	tr|A0A286YCV9|A0A286YCV9_MOUSE	A0A286YCV9	1682	0.998	TSELKSFTGMLGGASSGAEEDPLASEDPSNA	S	G	A	E	5	3	2	-0.182689	0.11905	0.283125	NA	NA	0.132175	NA	0.420026	STYX	0.073162	0.772677	0.276101	0.40117	CENTER
A0A286YCV9_1708 1709	tr|A0A286YCV9|A0A286YCV9_MOUSE	A0A286YCV9	1708 1709	0.899	DPSNARGQTLGRLEVTSDSEDASEVPEWLRE PSNARGQTLGRLEVTSDSEDASEVPEWLREG	T	S	D	S	5	2	3	NA	0.0128238	NA	0.484116	NA	-0.268771	-0.380838	0.0228247	STYX	0.24847	0.332266	-0.208928	0.441485	CENTER
A0A286YCV9_1709	tr|A0A286YCV9|A0A286YCV9_MOUSE	A0A286YCV9	1709	0.992	PSNARGQTLGRLEVTSDSEDASEVPEWLREG	S	D	S	E	5	2	3	0.412607	-0.0567053	NA	NA	NA	-0.119835	-0.429372	0.0523921	STYX	0.177951	0.595871	-0.165605	0.557713	CENTER
A0A286YCV9_1798	tr|A0A286YCV9|A0A286YCV9_MOUSE	A0A286YCV9	1798	0.991	RPSRVRRAVGTGRRRSSGLQPQGAPEVRRSA	S	S	G	L	8	5	3	-0.310589	0.0367406	0.0411136	0.119508	0.0177092	-0.678345	-0.684348	-1.11707	STYX	-0.0191036	0.682829	-0.826587	0.0168871	CENTER
A0A286YCV9_1798 1799	tr|A0A286YCV9|A0A286YCV9_MOUSE	A0A286YCV9	1798 1799	0.899	RPSRVRRAVGTGRRRSSGLQPQGAPEVRRSA PSRVRRAVGTGRRRSSGLQPQGAPEVRRSAT	S	S	G	L	8	5	3	-0.32817	-0.201897	0.166363	0.344865	0.098316	-0.417573	-0.277476	-0.523113	STYX	0.0158954	0.891225	-0.406054	0.142565	CENTER
A0A286YCV9_1818	tr|A0A286YCV9|A0A286YCV9_MOUSE	A0A286YCV9	1818	0.994	PQGAPEVRRSATISGSATNLASLTAALAKGD	S	A	T	N	4	2	2	-0.594473	-0.0956995	NA	NA	NA	-1.33465	NA	-2.37055	STYX	-0.345086	0.0607241	-1.8526	0.0161459	NR
A0A286YCV9_645	tr|A0A286YCV9|A0A286YCV9_MOUSE	A0A286YCV9	645	1	RLMYEHELEQLRRRLSPERQNCRGVDRLSFH	S	P	E	R	7	5	2	-0.307945	-0.524412	0.0138759	0.101254	0.572576	NA	-0.317998	0.327424	STYX	-0.0289301	0.557661	0.00471305	0.991311	CENTER
A0A286YDG0_12	tr|A0A286YDG0|A0A286YDG0_MOUSE,tr|D3YXI8|D3YXI8_MOUSE,tr|D3Z235|D3Z235_MOUSE,tr|D3Z236|D3Z236_MOUSE,tr|L7N292|L7N292_MOUSE,tr|L7N2D0|L7N2D0_MOUSE,tr|Q5EBJ2|Q5EBJ2_MOUSE,tr|Q9DAR5|Q9DAR5_MOUSE	A0A286YDG0	12	0.997	____MGSQAGSFRKASPQTPNIDENEKRIKR	S	P	Q	T	7	4	3	-0.613587	-0.006309	0.0612478	NA	-0.130703	0.854291	0.668435	0.329047	STYX	-0.172338	0.149467	0.617258	0.0569714	CENTER
A0A286YDG0_15	tr|A0A286YDG0|A0A286YDG0_MOUSE,tr|D3YXI8|D3YXI8_MOUSE,tr|D3Z235|D3Z235_MOUSE,tr|D3Z236|D3Z236_MOUSE,tr|L7N292|L7N292_MOUSE,tr|L7N2D0|L7N2D0_MOUSE,tr|Q5EBJ2|Q5EBJ2_MOUSE,tr|Q9DAR5|Q9DAR5_MOUSE	A0A286YDG0	15	0.999	_MGSQAGSFRKASPQTPNIDENEKRIKRLEK	T	P	N	I	7	4	3	-0.334613	0.32077	0.0189334	NA	0.183066	0.574996	0.957061	0.529031	STYX	0.0470391	0.790842	0.687029	0.0395424	CENTER
A0A286YE02_38	tr|A0A286YE02|A0A286YE02_MOUSE,sp|Q5BLK4|TUT7_MOUSE	A0A286YE02	38	0.997	PVRAAVDLGREKLLRTPTEKWKRQDDRDSRE	T	P	T	E	6	3	3	NA	-0.497406	NA	0.836978	-0.320761	0.496412	0.685162	0.491239	STYX	0.00627047	0.353755	0.557604	0.0674716	CENTER
A0A2I3BRL8_102	tr|A0A2I3BRL8|A0A2I3BRL8_MOUSE,sp|Q91VM5|RMXL1_MOUSE	A0A2I3BRL8	102	1	PSFESGRRGPPPPPRSRGPPRGLRGGSGGTR	S	R	G	P	8	5	3	-1.29554	-0.533157	-0.0288722	-0.00378064	-0.0680189	0.995543	0.822403	0.344169	STYX	-0.385874	0.0277239	0.720705	0.0384277	CENTER
A0A2I3BRL8_113	tr|A0A2I3BRL8|A0A2I3BRL8_MOUSE,sp|Q91VM5|RMXL1_MOUSE	A0A2I3BRL8	113	0.995	PPPRSRGPPRGLRGGSGGTRGPPSRGGYMDD	S	G	G	T	6	4	2	NA	-0.274853	0.190195	-0.0973983	-0.345104	NA	-0.756841	-1.09154	STYX	-0.13179	0.116213	-0.924192	0.0369845	NR
A0A2I3BRL8_121	tr|A0A2I3BRL8|A0A2I3BRL8_MOUSE,sp|Q91VM5|RMXL1_MOUSE	A0A2I3BRL8	121	0.998	PRGLRGGSGGTRGPPSRGGYMDDGGYSMNFN	S	R	G	G	4	2	2	-0.129054	-0.00648467	NA	NA	NA	NA	0.405965	0.344335	STYX	-0.0677695	0.316588	0.37515	0.264017	CENTER
A0A2I3BRL8_162 163	tr|A0A2I3BRL8|A0A2I3BRL8_MOUSE,sp|Q91VM5|RMXL1_MOUSE	A0A2I3BRL8	162 163	0.899	KRGPPPRSGGPPPKRSTPSGPVRSSSGMGGR RGPPPRSGGPPPKRSTPSGPVRSSSGMGGRT	S	T	P	S	8	5	3	0.0569921	-0.278066	-0.252845	-0.262483	0.439042	-0.198029	-0.0651045	-0.139739	STYX	-0.0594718	0.202819	-0.134291	0.615946	CENTER
A0A2I3BRL8_163	tr|A0A2I3BRL8|A0A2I3BRL8_MOUSE,sp|Q91VM5|RMXL1_MOUSE	A0A2I3BRL8	163	0.992	RGPPPRSGGPPPKRSTPSGPVRSSSGMGGRT	T	P	S	G	8	5	3	-0.170893	-0.353245	0.177816	-0.0664008	0.497634	0.0406772	0.102378	0.0106878	STYX	0.0169823	0.575469	0.0512476	0.813074	CENTER
A0A2I3BRL8_170 171 172	tr|A0A2I3BRL8|A0A2I3BRL8_MOUSE,sp|Q91VM5|RMXL1_MOUSE	A0A2I3BRL8	170 171 172	0.899	GGPPPKRSTPSGPVRSSSGMGGRTPVSRGRD GPPPKRSTPSGPVRSSSGMGGRTPVSRGRDS PPPKRSTPSGPVRSSSGMGGRTPVSRGRDSY	S	S	S	G	6	4	2	NA	-0.0617875	0.238768	-0.116296	0.452114	1.3188	NA	0.0214265	STYX	0.1282	0.687964	0.670114	0.231104	CENTER
A0A2I3BRL8_178	tr|A0A2I3BRL8|A0A2I3BRL8_MOUSE,sp|Q91VM5|RMXL1_MOUSE	A0A2I3BRL8	178	0.998	TPSGPVRSSSGMGGRTPVSRGRDSYGGPPRR	T	P	V	S	8	5	3	0.242105	-0.0923616	0.00108903	0.0142805	0.570249	-0.477121	-0.382222	-0.0765468	STYX	0.147072	0.531257	-0.311963	0.259084	CENTER
A0A2I3BRL8_205	tr|A0A2I3BRL8|A0A2I3BRL8_MOUSE,sp|Q91VM5|RMXL1_MOUSE,sp|Q9WV02|RBMX_MOUSE	A0A2I3BRL8	205	0.998	PPRREPLPSRRDVYLSPRDDGYSTKDNYSSR	S	P	R	D	8	5	3	0.705336	-0.30551	-0.136267	-0.432882	-0.131457	-0.186329	-0.0382154	-0.221269	STYX	-0.0601559	0.0814403	-0.148604	0.576003	CENTER
A0A2I3BRL8_323	tr|A0A2I3BRL8|A0A2I3BRL8_MOUSE,sp|Q91VM5|RMXL1_MOUSE,sp|Q9WV02|RBMX_MOUSE	A0A2I3BRL8	323	0.995	DDYSSSRDGYGGSRDSYSSSRSDLYSSGRDR	S	Y	S	S	6	3	3	-0.491659	-0.197026	-0.0761507	NA	NA	-0.0671674	0.15108	-0.269204	STYX	-0.254945	0.0249909	-0.0617637	0.837958	CENTER
A0A2I3BRL8_323 324 325 326 327	tr|A0A2I3BRL8|A0A2I3BRL8_MOUSE,sp|Q91VM5|RMXL1_MOUSE,sp|Q9ESC8|AFF4_MOUSE,sp|Q9WV02|RBMX_MOUSE	A0A2I3BRL8	323 324 325 326 327	0.87	DDYSSSRDGYGGSRDSYSSSRSDLYSSGRDR DYSSSRDGYGGSRDSYSSSRSDLYSSGRDRV YSSSRDGYGGSRDSYSSSRSDLYSSGRDRVG SSSRDGYGGSRDSYSSSRSDLYSSGRDRVGR SSRDGYGGSRDSYSSSRSDLYSSGRDRVGRQ	S	Y	S	S	5	3	2	-0.0498536	0.13002	-0.144327	NA	NA	0.0598157	NA	-0.598847	STYX	-0.021387	0.502894	-0.269515	0.478621	CENTER
A0A2I3BRL8_349	tr|A0A2I3BRL8|A0A2I3BRL8_MOUSE,sp|Q91VM5|RMXL1_MOUSE,sp|Q9WV02|RBMX_MOUSE	A0A2I3BRL8	349	1	SGRDRVGRQERGLPPSMERGYPPPRDSYSSS	S	M	E	R	8	5	3	0.0627192	-0.643184	-0.105848	0.109309	-0.105957	-0.178487	-0.190038	-0.0974334	STYX	-0.136592	0.189875	-0.155319	0.560952	CENTER
A0A2I3BRL8_88	tr|A0A2I3BRL8|A0A2I3BRL8_MOUSE,sp|Q91VM5|RMXL1_MOUSE,sp|Q9WV02|RBMX_MOUSE	A0A2I3BRL8	88	0.996	SLDGKAIKVEQATKPSFESGRRGPPPPPRSR	S	F	E	S	8	5	3	-0.0647329	0.213642	-0.071009	-0.195092	-0.000739868	-0.364541	-0.500125	-0.65866	STYX	-0.0235864	0.342149	-0.507775	0.0786698	CENTER
A0A2I3BRN2_122	tr|A0A2I3BRN2|A0A2I3BRN2_MOUSE	A0A2I3BRN2	122	0.997	CRLRAPSVAAVQRSHSDLVHSTQTRGHGGVQ	S	D	L	V	6	4	2	-0.26927	-0.531883	-0.00354187	NA	0.903822	NA	-0.2509	-0.118297	STYX	0.0247816	0.366715	-0.184598	0.571361	CENTER
A0A2R8VHF3_48	tr|A0A2R8VHF3|A0A2R8VHF3_MOUSE,sp|P05213|TBA1B_MOUSE,sp|P05214|TBA3_MOUSE,sp|P68369|TBA1A_MOUSE,sp|P68373|TBA1C_MOUSE	A0A2R8VHF3	48	0.996	DGQMPSDKTIGGGDDSFNTFFSETGAGKHVP	S	F	N	T	6	3	3	1.15934	0.438769	0.444242	NA	NA	-0.252143	-0.357038	-0.176867	STYX	0.680784	0.00758642	-0.262016	0.32412	CENTER
A0A2R8VHF7_150	tr|A0A2R8VHF7|A0A2R8VHF7_MOUSE	A0A2R8VHF7	150	0.998	SYRHVVRHWPLGASFSPGIVQRKTQVYTKSS	S	P	G	I	5	2	3	0.464923	-0.278524	NA	NA	NA	0.642475	-0.1719	0.423361	STYX	0.0931997	0.980598	0.297979	0.335533	CENTER
A0A2R8VJU7_332	tr|A0A2R8VJU7|A0A2R8VJU7_MOUSE	A0A2R8VJU7	332	1	HVLPRGPGWVNLAPVSPGQLMAPGPGKVRKR	S	P	G	Q	7	4	3	1.10153	0.0562816	0.290034	-0.397773	NA	0.725923	0.288811	0.611003	STYX	0.262519	0.45701	0.541912	0.0797671	CENTER
A0A2R8W6I7_198	tr|A0A2R8W6I7|A0A2R8W6I7_MOUSE,sp|P55194|3BP1_MOUSE	A0A2R8W6I7	198	0.999	TALAELRDNHSQADHSPLTTAAPFSRVYGVS	S	P	L	T	6	3	3	-0.0503757	0.580986	-0.0812588	NA	NA	-0.258101	0.0293588	-0.347403	STYX	0.149784	0.966458	-0.192049	0.477753	CENTER
A0A2R8W6I7_470 471	tr|A0A2R8W6I7|A0A2R8W6I7_MOUSE,sp|P55194|3BP1_MOUSE	A0A2R8W6I7	470 471	0.895	SMAVRERTEADLPKPTSPKVSRNPTETAASA MAVRERTEADLPKPTSPKVSRNPTETAASAE	T	S	P	K	6	4	2	NA	0.19558	-0.159819	-0.114931	-0.013255	-1.29604	NA	-1.66449	STYX	-0.0231061	0.397153	-1.48026	0.0169896	NR
A0A2R8W6I7_471	tr|A0A2R8W6I7|A0A2R8W6I7_MOUSE,sp|P55194|3BP1_MOUSE	A0A2R8W6I7	471	0.992	MAVRERTEADLPKPTSPKVSRNPTETAASAE	S	P	K	V	7	4	3	0.359332	0.311655	-0.279147	NA	-0.0931759	-1.18886	-1.19678	-1.23174	STYX	0.074666	0.927346	-1.20579	0.00456623	NR
A0A338P6K9_595	tr|A0A338P6K9|A0A338P6K9_MOUSE	A0A338P6K9	595	0.999	FASSTRGQTLQSSIPSPDPKSYAERKLDSSV	S	P	D	P	8	5	3	0.357311	0.0866445	-0.193587	-0.0393859	0.0136374	-0.12132	0.58423	-0.287283	STYX	0.044924	0.903763	0.0585425	0.901516	CENTER
A0A338P6R8_17	tr|A0A338P6R8|A0A338P6R8_MOUSE	A0A338P6R8	17	1	DSLAAPQDRLVEQLLSPRTQAQRRLKDIDKQ	S	P	R	T	4	2	2	0.88545	-0.692449	NA	NA	NA	NA	0.321349	1.16586	STYX	0.0965007	0.972109	0.743604	0.108214	CENTER
A0A338P6R8_336	tr|A0A338P6R8|A0A338P6R8_MOUSE,sp|Q9Z2Q6|SEPT5_MOUSE	A0A338P6R8	336	0.999	IQQMTSKLTQDSRMESPIPILPLPTPDAETE	S	P	I	P	8	5	3	0.0919313	0.0298674	0.311362	0.183448	0.249135	0.564773	0.592505	0.712831	STYX	0.173149	0.0901424	0.623369	0.0476573	CENTER
A0A3B2WD63_358	tr|A0A3B2WD63|A0A3B2WD63_MOUSE	A0A3B2WD63	358	0.999	STQAPTVSQVKAPFPSMDAGATSCLKIKRSG	S	M	D	A	5	3	2	NA	-0.298581	NA	-0.133392	-0.339092	NA	-0.245848	0.97889	STYX	-0.257022	0.0131108	0.366521	0.508383	CENTER
A16A1_538	sp|Q571I9|A16A1_MOUSE	Q571I9	538	0.996	SPAPPYGLFVGGRFQSPGTQSSRPIQDSSGK	S	P	G	T	5	2	3	NA	0.17506	NA	NA	-0.108783	0.0609692	0.196088	0.0458987	STYX	0.0331383	0.919842	0.100985	0.663646	CENTER
A16L1_287	sp|Q8C0J2|A16L1_MOUSE	Q8C0J2	287	0.997	AGGLLDSITNIFGRRSVSSIPVPQDIMDTHP	S	V	S	S	7	4	3	0.0106195	0.0375425	0.144348	NA	0.291667	-0.579091	-0.832541	-0.7947	STYX	0.121044	0.344588	-0.735444	0.0225334	CENTER
A16L2_308	sp|Q6KAU8|A16L2_MOUSE	Q6KAU8	308	1	DVVKGLLDFKKRRGHSVGGAPEQRYQSIPVC	S	V	G	G	7	4	3	NA	-0.514659	0.310091	0.239206	0.385428	-0.129377	-0.70983	-0.258311	STYX	0.105016	0.290409	-0.365839	0.21584	CENTER
A1L3P4_658	tr|A1L3P4|A1L3P4_MOUSE	A1L3P4	658	0.987	ESATASAPRRFMGNSSEDALDRELTFGDHEL	S	E	D	A	5	2	3	0.931305	0.540559	NA	NA	NA	-0.326103	-0.211082	0.179921	STYX	0.735932	0.0229896	-0.119088	0.669577	CENTER
A1L3P4_687	tr|A1L3P4|A1L3P4_MOUSE	A1L3P4	687	0.999	ELVIRGTRLVLPMDDSEPALNSLDDTRHSPA	S	E	P	A	8	5	3	0.562989	0.0584026	-0.0160758	0.91067	-0.225089	-0.420702	-0.219333	-0.168757	STYX	0.258179	0.464655	-0.269597	0.316244	CENTER
A1L3P4_700	tr|A1L3P4|A1L3P4_MOUSE	A1L3P4	700	0.998	DDSEPALNSLDDTRHSPA_____________	S	P	A	_	8	5	3	0.452425	0.0778244	0.355416	0.220942	-0.11894	-0.0177953	-0.448547	-0.0320454	STYX	0.197533	0.155759	-0.166129	0.555469	CENTER
A2A484_410	tr|A2A484|A2A484_MOUSE	A2A484	410	0.997	TDKQEKVKLNFDMTASPKILLSKPLLSGGAG	S	P	K	I	7	4	3	0.362166	-0.139141	NA	-0.0439828	-0.37669	-0.769225	-0.597823	-0.86787	STYX	-0.0494119	0.313059	-0.744972	0.0215028	CENTER
A2A484_429	tr|A2A484|A2A484_MOUSE	A2A484	429	0.996	LLSKPLLSGGAGRRISLSDMPRSPTSTNSSV	S	L	S	D	4	2	2	NA	-0.202094	NA	NA	-1.08958	-0.452045	NA	-0.315596	STYX	-0.645835	0.0277201	-0.38382	0.249122	CENTER
A2A484_553	tr|A2A484|A2A484_MOUSE	A2A484	553	0.999	LSESVQQQSAPVPLISPKRQIRSRFQLNLDK	S	P	K	R	8	5	3	0.056681	0.311462	-0.214041	-0.0926083	-0.350565	-0.595946	-0.552594	-0.908144	STYX	-0.0578142	0.268683	-0.685561	0.0308674	CENTER
A2A484_658	tr|A2A484|A2A484_MOUSE	A2A484	658	0.996	KPTNQVEVKEEAKSNSPVSEKPDPTPAKDKA	S	P	V	S	7	4	3	-0.245784	0.0703157	0.00949673	0.0710368	NA	-1.60744	-1.18317	-1.14225	STYX	-0.0237337	0.606083	-1.31095	0.00422293	NR
A2A484_674	tr|A2A484|A2A484_MOUSE	A2A484	674	1	PVSEKPDPTPAKDKASPEPEKDFVEKAKPSP	S	P	E	P	5	2	3	-0.155102	-0.0169783	NA	NA	NA	-1.67403	-1.58106	-1.3291	STYX	-0.08604	0.253112	-1.52806	0.00329882	NR
A2A484_763	tr|A2A484|A2A484_MOUSE	A2A484	763	0.999	AIGKPPPSSTSAGNQSPPETPVLTRSATQAP	S	P	P	E	8	5	3	-0.696679	0.0554693	0.0239676	-0.0766746	-0.106154	-0.45575	-0.78591	-0.606255	STYX	-0.160014	0.127385	-0.615972	0.0431217	CENTER
A2A4P4_219	tr|A2A4P4|A2A4P4_MOUSE,sp|Q3THG9|AASD1_MOUSE	A2A4P4	219	0.998	TRRGAQADHFTESPLSPGSQVQVRVDWERRF	S	P	G	S	7	5	2	0.235147	0.10885	0.0549738	-0.140464	0.198574	NA	0.09096	-0.096378	STYX	0.0914163	0.465541	-0.002709	0.980206	CENTER
A2A4P4_540	tr|A2A4P4|A2A4P4_MOUSE,sp|Q3THG9|AASD1_MOUSE	A2A4P4	540	0.999	RAEAQALLQDYVSTQSAEE____________	S	A	E	E	4	2	2	0.735561	0.0403485	NA	NA	NA	NA	-0.42413	0.326064	STYX	0.387955	0.226041	-0.0490331	0.894925	CENTER
A2A5N3_341 342	tr|A2A5N3|A2A5N3_MOUSE,sp|P29341|PABP1_MOUSE,tr|Q62029|Q62029_MOUSE,tr|Q6PHQ9|Q6PHQ9_MOUSE,tr|Q9D4E6|Q9D4E6_MOUSE	A2A5N3	341 342	0.883	MTESSHSKGFGFVCFSSPEEATKAVTEMNGR TESSHSKGFGFVCFSSPEEATKAVTEMNGRI	S	S	P	E	4	2	2	NA	-0.282539	NA	NA	0.00785475	0.64581	NA	0.978017	STYX	-0.137342	0.225664	0.811914	0.0611983	CENTER
A2A5N3_342	tr|A2A5N3|A2A5N3_MOUSE,sp|P29341|PABP1_MOUSE,tr|Q62029|Q62029_MOUSE,tr|Q6PHQ9|Q6PHQ9_MOUSE,tr|Q9D4E6|Q9D4E6_MOUSE	A2A5N3	342	0.995	TESSHSKGFGFVCFSSPEEATKAVTEMNGRI	S	P	E	E	7	4	3	0.38023	-0.158992	0.139016	-0.114847	NA	1.11791	1.15137	0.858865	STYX	0.0613518	0.917507	1.04271	0.00927852	NR
A2A654_1302	tr|A2A654|A2A654_MOUSE	A2A654	1302	0.999	KPDPKDQVLDDVSIQSPGPNCQRQNSVESDL	S	P	G	P	6	3	3	-0.242619	0.177385	0.104686	NA	NA	-0.453638	-0.365077	-0.262937	STYX	0.0131506	0.973174	-0.36055	0.183015	CENTER
A2A654_1388	tr|A2A654|A2A654_MOUSE	A2A654	1388	1	VVSSSKSTLPASVPKSPRDRDARAFSKAVDF	S	P	R	D	8	5	3	0.478289	-0.0393068	-0.174889	-0.184491	-0.186144	0.0364261	-0.122457	-0.110515	STYX	-0.0213083	0.174869	-0.065515	0.82076	CENTER
A2A654_1674	tr|A2A654|A2A654_MOUSE	A2A654	1674	1	EDMETESPEVKRVIPSPVRTGEGSNLSKGFM	S	P	V	R	8	5	3	1.31052	-0.416794	-0.121952	-0.15109	-0.310297	0.415013	0.387538	0.0480655	STYX	0.0620781	0.0856738	0.283539	0.299563	CENTER
A2A654_228	tr|A2A654|A2A654_MOUSE	A2A654	228	1	SSTPGRRKPRVHRPRSPILEEKDIPPLEFPK	S	P	I	L	8	5	3	0.761088	-0.133651	0.00719578	-0.144523	-0.576443	0.0197509	0.374315	0.184556	STYX	-0.0172666	0.247081	0.192874	0.455331	CENTER
A2A654_2468	tr|A2A654|A2A654_MOUSE	A2A654	2468	0.998	QPQSSVQGQSPVRVQSPPLTRIRPSTPSQVT	S	P	P	L	8	5	3	0.295929	-0.269828	-0.0839681	0.145609	-0.23703	-0.250485	0.0619762	-0.141121	STYX	-0.0298578	0.405776	-0.109877	0.69163	CENTER
A2A6P4_62	tr|A2A6P4|A2A6P4_MOUSE	A2A6P4	62	0.997	TAPTVRCRRGAAPRRSPSPAAMSERLRPRKR	S	P	S	P	8	5	3	-0.239975	0.025755	0.0445835	-0.0380228	0.142467	0.0945419	-0.136839	0.205896	STYX	-0.0130384	0.592754	0.054533	0.804578	CENTER
A2A6P4_64	tr|A2A6P4|A2A6P4_MOUSE	A2A6P4	64	0.994	PTVRCRRGAAPRRSPSPAAMSERLRPRKRRR	S	P	A	A	8	5	3	-0.331187	0.023124	0.238912	-0.0312066	0.00587741	0.265626	-0.0835602	-0.255515	STYX	-0.018896	0.585826	-0.024483	0.938452	CENTER
A2A6P4_82	tr|A2A6P4|A2A6P4_MOUSE	A2A6P4	82	0.999	AMSERLRPRKRRRNGSDDDNHPPPQTKRSSR	S	D	D	D	8	5	3	-0.915813	1.21662	-0.0109551	0.0313111	0.437799	-0.623742	-0.769111	-0.129586	STYX	0.151792	0.616747	-0.50748	0.101313	CENTER
A2A716_292	tr|A2A716|A2A716_MOUSE	A2A716	292	0.997	ATHRKAPGTQMLTAGSASALPGVGPREKVSS	S	A	S	A	7	5	2	-0.135957	-0.0892143	0.085245	0.168774	-0.0138331	-0.646521	NA	-0.504767	STYX	0.00300295	0.604119	-0.575644	0.1116	CENTER
A2A716_347	tr|A2A716|A2A716_MOUSE	A2A716	347	0.999	LHRLLQSLESLHRIPSAPVIPTHQTSVTTER	S	A	P	V	4	2	2	-0.203439	0.0531738	NA	NA	NA	-0.355768	NA	-0.711022	STYX	-0.0751324	0.389066	-0.533395	0.142623	CENTER
A2A716_393	tr|A2A716|A2A716_MOUSE	A2A716	393	0.999	FAKDDTIGRVGRLHGSVPNLSRYLESRDTSG	S	V	P	N	8	5	3	0.0208971	-0.316454	-0.1566	0.175751	-0.0921821	0.643156	-0.507123	-0.376468	STYX	-0.0737176	0.187785	-0.0801453	0.700526	CENTER
A2A7B5_638	tr|A2A7B5|A2A7B5_MOUSE	A2A7B5	638	0.998	SPSSTNCESKKRRTASPPVLPKIKAETDSDS	S	P	P	V	8	5	3	0.261978	-0.377385	-0.176535	-0.152805	-0.0250473	-0.0302774	-0.105404	-0.208916	STYX	-0.0939589	0.124872	-0.114866	0.671039	CENTER
A2A7B5_733 734 735	tr|A2A7B5|A2A7B5_MOUSE	A2A7B5	733 734 735	0.888	PASMLAVTSSRFKRRTSSPPSSPQHSPALRD ASMLAVTSSRFKRRTSSPPSSPQHSPALRDF SMLAVTSSRFKRRTSSPPSSPQHSPALRDFG	T	S	S	P	8	5	3	-0.369125	-0.403686	0.0524902	-0.204892	0.159303	0.0946422	0.344679	0.149718	STYX	-0.153182	0.100411	0.196346	0.437134	CENTER
A2A7B5_733 734 735 738 739	tr|A2A7B5|A2A7B5_MOUSE	A2A7B5	733 734 735 738 739	0.892	PASMLAVTSSRFKRRTSSPPSSPQHSPALRD ASMLAVTSSRFKRRTSSPPSSPQHSPALRDF SMLAVTSSRFKRRTSSPPSSPQHSPALRDFG AVTSSRFKRRTSSPPSSPQHSPALRDFGKQS VTSSRFKRRTSSPPSSPQHSPALRDFGKQSD	T	S	S	P	7	5	2	-0.709804	-0.03292	0.112158	-0.0566353	0.29159	-0.0891426	0.0461547	NA	STYX	-0.0791224	0.624276	-0.0214939	0.968975	CENTER
A2A7B5_735	tr|A2A7B5|A2A7B5_MOUSE	A2A7B5	735	0.99	SMLAVTSSRFKRRTSSPPSSPQHSPALRDFG	S	P	P	S	4	2	2	-0.344438	-0.115889	NA	NA	NA	NA	0.898044	-0.0191952	STYX	-0.230163	0.0595851	0.439424	0.325855	CENTER
A2A7B5_792	tr|A2A7B5|A2A7B5_MOUSE	A2A7B5	792	0.997	SPAWSLSGRDERETGSPPCFDEYKISKEWAA	S	P	P	C	8	5	3	0.19322	0.0251073	0.225054	-0.580924	-0.535775	-0.0814371	-0.148679	-0.0931499	STYX	-0.134664	0.531937	-0.107755	0.695381	CENTER
A2A7F4_1265 1266	tr|A2A7F4|A2A7F4_MOUSE	A2A7F4	1265 1266	0.899	LESSCEETESKISGISSPIGSHREEGEEKEG ESSCEETESKISGISSPIGSHREEGEEKEGR	S	S	P	I	4	2	2	NA	0.176196	-0.0197401	NA	NA	-0.366408	NA	-0.430484	STYX	0.0782278	0.728765	-0.398446	0.230276	CENTER
A2A7F4_631	tr|A2A7F4|A2A7F4_MOUSE	A2A7F4	631	0.996	KKLLLKSAQRGIYPKSPTGSLEQNPEQARGE	S	P	T	G	6	3	3	0.473816	0.0486351	0.0200389	NA	NA	-0.0532913	-0.531162	-0.802252	STYX	0.18083	0.366883	-0.462235	0.138567	CENTER
A2A9H6_3616	tr|A2A9H6|A2A9H6_MOUSE	A2A9H6	3616	1	ILKLDKKCGHDLRANTQDKLWEVKKRSSVKS	T	Q	D	K	5	3	2	NA	-0.285781	NA	-0.149585	-0.00493118	0.888978	NA	0.785839	STYQ	-0.146766	0.0796522	0.837408	0.0529568	NR
A2A9H6_3631 3632	tr|A2A9H6|A2A9H6_MOUSE	A2A9H6	3631 3632	0.899	TQDKLWEVKKRSSVKSSAESSEVAETPR___ QDKLWEVKKRSSVKSSAESSEVAETPR____	S	S	A	E	6	4	2	NA	-0.278389	0.140085	-0.20615	0.2322	NA	0.715411	0.732979	STYX	-0.0280637	0.577837	0.724195	0.0741121	CENTER
A2A9H6_3632	tr|A2A9H6|A2A9H6_MOUSE	A2A9H6	3632	0.991	QDKLWEVKKRSSVKSSAESSEVAETPR____	S	A	E	S	6	4	2	-0.222552	-0.144012	0.433559	NA	0.348508	NA	0.559662	0.736503	STYX	0.103876	0.931671	0.648083	0.0983421	CENTER
A2A9H6_3635	tr|A2A9H6|A2A9H6_MOUSE	A2A9H6	3635	0.991	LWEVKKRSSVKSSAESSEVAETPR_______	S	S	E	V	7	4	3	-0.121367	-0.152862	NA	-0.326698	0.12626	1.09697	1.06594	0.814455	STYX	-0.118667	0.102995	0.992455	0.010735	NR
A2A9H6_3636	tr|A2A9H6|A2A9H6_MOUSE	A2A9H6	3636	0.996	WEVKKRSSVKSSAESSEVAETPR________	S	E	V	A	7	4	3	-0.177754	0.0273921	NA	0.2503	0.575581	1.22798	0.892203	1.04759	STYX	0.16888	0.491691	1.05593	0.00900723	NR
A2AB62_12	tr|A2AB62|A2AB62_MOUSE	A2AB62	12	0.989	____MEGSRGQKTKRSPSTLRRPPQKPRNIL	S	P	S	T	8	5	3	-0.75251	-0.0984015	1.69484	0.285142	-0.0347749	1.94551	1.41627	1.11232	STYX	0.218859	0.909097	1.49137	0.00458346	NR
A2AB62_355	tr|A2AB62|A2AB62_MOUSE	A2AB62	355	0.996	TSQPLEQMRPSKLASSPPTLVQKHPSSPSPA	S	P	P	T	8	5	3	0.643768	-0.18023	0.167561	-0.20358	-0.585704	1.148	1.49179	1.30951	STYX	-0.0316371	0.379576	1.31643	0.00506325	NR
A2AB62_94	tr|A2AB62|A2AB62_MOUSE	A2AB62	94	0.987	ANQPYWSGPDDRSQSSADDSLLPLTPRQLAA	S	A	D	D	4	2	2	0.232537	0.286455	NA	NA	NA	NA	0.264062	0.375601	STYX	0.259496	0.0992789	0.319832	0.328118	CENTER
A2ADI4_730	tr|A2ADI4|A2ADI4_MOUSE,sp|Q3V0Y1|P4R3C_MOUSE	A2ADI4	730	0.998	EGQKIKSSEAFERCPSHGDASATRMSRSHCS	S	H	G	D	8	5	3	-0.701879	-0.356202	-0.203831	-0.0451708	0.880691	1.6231	0.534988	0.199901	STYX	-0.0852782	0.102333	0.785996	0.065687	CENTER
A2ADM8_455	tr|A2ADM8|A2ADM8_MOUSE,sp|Q5HZG4|TAF3_MOUSE	A2ADM8	455	1	FDIRALEPSRRRAALSPARSTFTPLEKARPL	S	P	A	R	7	4	3	NA	-0.597629	-0.321318	0.0997878	-0.406795	0.556118	0.564676	0.307913	STYX	-0.306489	0.0267036	0.476236	0.106111	CENTER
A2ADW8_19	tr|A2ADW8|A2ADW8_MOUSE,tr|A2AJU2|A2AJU2_MOUSE,tr|A2BI02|A2BI02_MOUSE,tr|A2BI72|A2BI72_MOUSE,tr|B1AV09|B1AV09_MOUSE,tr|B1AVZ5|B1AVZ5_MOUSE,tr|B1B0X0|B1B0X0_MOUSE,tr|B1B0X6|B1B0X6_MOUSE,tr|E9QA14|E9QA14_MOUSE,tr|Q62012|Q62012_MOUSE	A2ADW8	19	0.999	REDEIRQLRYLEAANSEEEYNEENDIQSESS	S	E	E	E	8	5	3	0.218102	0.0985634	-0.0867299	0.133825	-0.0696606	-0.0640772	-0.28728	-0.278741	STYX	0.0588199	0.810245	-0.210032	0.431319	CENTER
A2ADW8_384	tr|A2ADW8|A2ADW8_MOUSE,tr|A2AJU2|A2AJU2_MOUSE,tr|A2BI02|A2BI02_MOUSE,tr|A2BI72|A2BI72_MOUSE,tr|B1AV09|B1AV09_MOUSE,tr|B1B0X0|B1B0X0_MOUSE,tr|B1B0X6|B1B0X6_MOUSE,tr|E9QA14|E9QA14_MOUSE,tr|Q62012|Q62012_MOUSE	A2ADW8	384	0.999	ERYHGPRGRNGPRDASPPGSEPEIDRSSAIR	S	P	P	G	8	5	3	0.477334	-0.0115196	0.0403279	-0.181244	0.120664	-0.103992	-0.193294	-0.636363	STYX	0.0891127	0.806955	-0.311216	0.284741	CENTER
A2ADW8_443	tr|A2ADW8|A2ADW8_MOUSE,tr|A2AJU2|A2AJU2_MOUSE,tr|A2BI02|A2BI02_MOUSE,tr|A2BI72|A2BI72_MOUSE,tr|B1AV09|B1AV09_MOUSE,tr|B1AVZ5|B1AVZ5_MOUSE,tr|B1AZM2|B1AZM2_MOUSE,tr|B1B0X0|B1B0X0_MOUSE,tr|B1B0X6|B1B0X6_MOUSE,tr|E9QA14|E9QA14_MOUSE,tr|Q62012|Q62012_MOUSE	A2ADW8	443	0.999	SAEESDESFDRLTCRSMLDTLY_________	S	M	L	D	5	2	3	0.576932	-1.00603	NA	NA	NA	-0.00761901	-0.261173	0.331673	STYX	-0.214549	0.913475	0.0209602	0.932284	CENTER
A2AF73_227	tr|A2AF73|A2AF73_MOUSE	A2AF73	227	0.994	NKELDKLEDTVGKRSSLVMKEEDRQHWDDVK	S	L	V	M	5	2	3	0.695419	-0.802468	NA	NA	NA	0.700859	1.34058	1.38667	STYX	-0.0535248	0.944187	1.1427	0.00909568	NR
A2AF73_338	tr|A2AF73|A2AF73_MOUSE	A2AF73	338	0.99	SKRPSETASSIQKQPSFTEPKMSQEHLERKT	S	F	T	E	6	3	3	NA	-0.282524	0.0674277	NA	-0.195964	0.242506	0.223925	1.34307	STYX	-0.13702	0.129373	0.603166	0.119131	CENTER
A2AF73_345	tr|A2AF73|A2AF73_MOUSE	A2AF73	345	1	ASSIQKQPSFTEPKMSQEHLERKTSISSMRT	S	Q	E	H	7	4	3	0.67803	-0.372387	0.299287	-0.0802346	NA	1.21238	1.34336	1.64914	STYQ	0.131174	0.841912	1.40162	0.00456814	NR
A2AF73_353 354	tr|A2AF73|A2AF73_MOUSE	A2AF73	353 354	0.853	SFTEPKMSQEHLERKTSISSMRTSISERLMQ FTEPKMSQEHLERKTSISSMRTSISERLMQE	T	S	I	S	6	4	2	NA	-0.782958	0.012565	-0.00751201	0.0522065	1.32389	NA	0.86975	STYX	-0.181425	0.321972	1.09682	0.032569	NR
A2AF73_354	tr|A2AF73|A2AF73_MOUSE	A2AF73	354	0.98	FTEPKMSQEHLERKTSISSMRTSISERLMQE	S	I	S	S	8	5	3	-0.133979	-0.525193	-0.0790512	-0.106812	0.564384	1.737	1.42459	1.49079	STYX	-0.0561304	0.160829	1.55079	0.00375333	NR
A2AF73_400	tr|A2AF73|A2AF73_MOUSE	A2AF73	400	0.998	DEDQSSLYKLLETRFSPIARRRSSLAEDQAF	S	P	I	A	8	5	3	0.291416	-0.781962	0.0369292	-0.11797	-0.172857	1.4932	1.16713	0.81333	STYX	-0.148889	0.212493	1.15789	0.00800738	NR
A2AF73_407 408	tr|A2AF73|A2AF73_MOUSE	A2AF73	407 408	0.851	YKLLETRFSPIARRRSSLAEDQAFQEVLEPK KLLETRFSPIARRRSSLAEDQAFQEVLEPKY	S	S	L	A	8	5	3	-0.0377282	-0.203386	0.173989	0.425909	-0.244349	0.746855	0.375324	0.393723	STYX	0.022887	0.631329	0.505301	0.0940871	CENTER
A2AF73_497	tr|A2AF73|A2AF73_MOUSE	A2AF73	497	0.99	FTDQKPMEDNLHSILTSPSTRRTSVSDQRMF	T	S	P	S	7	5	2	0.281534	0.0272464	0.302722	0.364373	0.213483	NA	0.604278	0.707169	STYX	0.237872	0.0294466	0.655724	0.0935389	CENTER
A2AF73_497 498	tr|A2AF73|A2AF73_MOUSE	A2AF73	497 498	0.897	FTDQKPMEDNLHSILTSPSTRRTSVSDQRMF TDQKPMEDNLHSILTSPSTRRTSVSDQRMFY	T	S	P	S	8	5	3	-0.090069	0.229022	0.206303	-0.334251	0.0572071	0.0362794	0.143544	0.735748	STYX	0.0136424	0.9243	0.30519	0.318898	CENTER
A2AF73_498	tr|A2AF73|A2AF73_MOUSE	A2AF73	498	0.974	TDQKPMEDNLHSILTSPSTRRTSVSDQRMFY	S	P	S	T	5	3	2	0.0142644	0.443797	NA	NA	-0.131939	NA	0.163888	0.495452	STYX	0.108707	0.90554	0.32967	0.331694	CENTER
A2AF73_504 505	tr|A2AF73|A2AF73_MOUSE	A2AF73	504 505	0.862	EDNLHSILTSPSTRRTSVSDQRMFYEPIQIK DNLHSILTSPSTRRTSVSDQRMFYEPIQIKS	T	S	V	S	5	2	3	-1.13227	0.536294	NA	NA	NA	3.05489	1.59081	1.10826	STYX	-0.297985	0.900627	1.91799	0.00420338	NR
A2AF73_520	tr|A2AF73|A2AF73_MOUSE	A2AF73	520	1	SVSDQRMFYEPIQIKSAPPIIKKTSFAEEKS	S	A	P	P	8	5	3	0.290331	-0.647209	-0.156297	-0.17998	-0.275005	0.537008	0.589883	1.14878	STYX	-0.193632	0.0416371	0.758557	0.0324799	CENTER
A2AHM1_40	tr|A2AHM1|A2AHM1_MOUSE	A2AHM1	40	0.999	LQGAQPTGKEEGKAASPALDQGDGPSSSDRG	S	P	A	L	6	3	3	-0.602475	0.0920194	-0.0739252	NA	NA	0.314154	0.437348	0.0492233	STYX	-0.194793	0.232553	0.266908	0.324185	CENTER
A2AK42_60 61 62	tr|A2AK42|A2AK42_MOUSE,tr|A2AK44|A2AK44_MOUSE,sp|Q8C5N3|CWC22_MOUSE	A2AK42	60 61 62	0.881	YSDYSRSDYERSRRGYSYDDSMESRSRDREK SDYSRSDYERSRRGYSYDDSMESRSRDREKR DYSRSDYERSRRGYSYDDSMESRSRDREKRR	Y	S	Y	D	8	5	3	0.146023	-0.142455	-0.0704091	-0.0577573	0.56638	-0.300871	-0.854995	-0.538998	STYX	0.0883564	0.871206	-0.564955	0.0668922	CENTER
A2AMD0_171	tr|A2AMD0|A2AMD0_MOUSE,sp|Q05CL8|LARP7_MOUSE	A2AMD0	171	1	ASSLPEARAGKRERCSAEDEDCLPPRPKAKK	S	A	E	D	8	5	3	0.268646	0.239541	-0.0254739	-0.041725	0.251056	0.0723265	0.114193	0.159692	STYX	0.138409	0.271833	0.115404	0.618959	CENTER
A2AMW4_72	tr|A2AMW4|A2AMW4_MOUSE	A2AMW4	72	0.999	NSEEGCAASRASSPHSPPGAGSSCTAMISSP	S	P	P	G	5	3	2	-0.842845	0.155501	NA	NA	0.112549	NA	0.287462	0.0488956	STYX	-0.191599	0.837018	0.168179	0.586821	CENTER
A2ANY6_2908	tr|A2ANY6|A2ANY6_MOUSE	A2ANY6	2908	0.999	LSRGFLEKAHDASSPSQPDLSSLVHLTRRVQ	S	Q	P	D	5	3	2	0.345412	0.118138	0.209492	NA	NA	NA	-0.231445	0.0359424	STYQ	0.224347	0.087528	-0.0977512	0.773113	CENTER
A2ANY6_4827	tr|A2ANY6|A2ANY6_MOUSE	A2ANY6	4827	1	GNLNKNKKHQDEKEDSEPEDVEQGQEKINEQ	S	E	P	E	8	5	3	-0.449374	2.51907	0.173235	-0.228308	-0.243243	-0.0934758	0.18495	0.475549	STYX	0.354276	0.375211	0.189008	0.488767	CENTER
A2ANY6_5235 5236 5237	tr|A2ANY6|A2ANY6_MOUSE	A2ANY6	5235 5236 5237	0.899	VDMQTLKTKEDQDPRTTTPHQETENERPERS DMQTLKTKEDQDPRTTTPHQETENERPERSR MQTLKTKEDQDPRTTTPHQETENERPERSRD	T	T	T	P	6	4	2	-0.708347	NA	-0.31488	-0.234021	-0.0930527	0.0705079	0.437529	NA	STYX	-0.337575	0.00452213	0.254018	0.446897	CENTER
A2APA5_143	tr|A2APA5|A2APA5_MOUSE	A2APA5	143	0.996	SKVRNLKVSMATNSNSRQQVPESPTNLYNNV	S	R	Q	Q	5	2	3	0.257391	-0.194293	NA	NA	NA	1.32545	1.4244	1.50878	STYX	0.031549	0.885736	1.41955	0.00421581	NR
A2APZ1_63	tr|A2APZ1|A2APZ1_MOUSE	A2APZ1	63	0.998	GAWRRDRKSQRLPCGSPESPNARRDRGTARA	S	P	E	S	8	5	3	-0.169769	0.161702	0.0605591	-0.0280635	0.199483	0.0185947	0.251987	-0.341583	STYX	0.0447825	0.900646	-0.0236669	0.946858	CENTER
A2APZ1_66	tr|A2APZ1|A2APZ1_MOUSE	A2APZ1	66	0.998	RRDRKSQRLPCGSPESPNARRDRGTARALLL	S	P	N	A	8	5	3	0.193657	0.436051	-0.108865	-0.193144	0.0438662	0.405211	0.393032	0.791655	STYX	0.0743132	0.95033	0.529966	0.0842814	CENTER
A2ATK9_357 358	tr|A2ATK9|A2ATK9_MOUSE	A2ATK9	357 358	0.888	LQLPPALESSKRDQATSMSHINLLFSRRASD QLPPALESSKRDQATSMSHINLLFSRRASDY	T	S	M	S	7	5	2	0.0961529	-0.410507	0.148874	0.0411152	-0.426283	-0.800468	NA	-1.03165	STYX	-0.11013	0.375322	-0.916058	0.0363805	NR
A2ATK9_460	tr|A2ATK9|A2ATK9_MOUSE	A2ATK9	460	1	DNLTPSGTLGKDYHKSVEIFPLKARKSMEKE	S	V	E	I	5	2	3	0.617579	-0.680107	NA	NA	NA	-0.831373	-0.480791	-0.52992	STYX	-0.0312639	0.9309	-0.614028	0.0448188	CENTER
A2ATK9_824	tr|A2ATK9|A2ATK9_MOUSE	A2ATK9	824	0.998	EDSALRCLLEGSGRRSGGQLPSLQEETTKRT	S	G	G	Q	7	5	2	-0.00534276	0.160276	-0.0619953	0.0735986	-0.202024	-0.655334	-0.536656	NA	STYX	-0.00709737	0.573916	-0.595995	0.102407	CENTER
A2ATK9_839 840	tr|A2ATK9|A2ATK9_MOUSE	A2ATK9	839 840	0.873	SGGQLPSLQEETTKRTSDVPLEPLASPNQRR GGQLPSLQEETTKRTSDVPLEPLASPNQRRS	T	S	D	V	4	2	2	0.317467	0.80116	NA	NA	NA	-0.00347972	NA	-0.650695	STYX	0.559313	0.0377629	-0.327087	0.388255	CENTER
A2ATK9_840	tr|A2ATK9|A2ATK9_MOUSE	A2ATK9	840	0.975	GGQLPSLQEETTKRTSDVPLEPLASPNQRRS	S	D	V	P	4	2	2	0.0216412	0.0752221	NA	NA	NA	-0.155487	NA	-0.540738	STYX	0.0484316	0.851583	-0.348112	0.317063	CENTER
A2AUY4_1200	tr|A2AUY4|A2AUY4_MOUSE	A2AUY4	1200	0.997	ASGGIDLGEEQHPLGTPTPGRKRRRKGGDSD	T	P	T	P	8	5	3	0.000480101	0.283243	0.0569108	-0.0545516	0.0506825	-0.0722461	0.199538	-0.431804	STYX	0.0673531	0.75781	-0.101504	0.736412	CENTER
A2BH01_24	tr|A2BH01|A2BH01_MOUSE	A2BH01	24	0.997	KSKSVKRPQDSSDTQSDDVIQRRVPRTPAEQ	S	D	D	V	5	3	2	-0.208283	0.257759	NA	NA	0.11432	0.246888	0.484032	NA	STYX	0.0545986	0.845697	0.36546	0.283539	CENTER
A2RT18_110	tr|A2RT18|A2RT18_MOUSE	A2RT18	110	0.998	SQFPKDSWSASRTINSDSESPVMSSDSMKYM	S	D	S	E	8	5	3	0.190973	0.213638	0.0793049	0.0574566	0.113535	0.249434	0.399691	0.132893	STYX	0.130982	0.161541	0.260673	0.32098	CENTER
A2RT18_114	tr|A2RT18|A2RT18_MOUSE	A2RT18	114	0.998	KDSWSASRTINSDSESPVMSSDSMKYMKKAE	S	P	V	M	4	2	2	NA	NA	-0.452577	NA	-0.089719	NA	0.400443	0.0602619	STYX	-0.271148	0.0678438	0.230352	0.481778	CENTER
A2RT18_133 134	tr|A2RT18|A2RT18_MOUSE	A2RT18	133 134	0.871	SSDSMKYMKKAETCKSTCNLERLKAAHKSES SDSMKYMKKAETCKSTCNLERLKAAHKSESL	S	T	C	N	7	5	2	-0.363788	-0.578963	-0.132585	0.938938	0.184854	0.80151	NA	1.18207	STYX	0.0096913	0.403966	0.99179	0.0390496	NR
A2RT18_148	tr|A2RT18|A2RT18_MOUSE	A2RT18	148	0.996	STCNLERLKAAHKSESLQDWLDAKRKQLDSD	S	L	Q	D	5	2	3	-0.100904	0.146034	NA	NA	NA	0.553206	0.725593	1.25492	STYX	0.0225653	0.868306	0.844573	0.0234261	NR
A2RT18_255	tr|A2RT18|A2RT18_MOUSE	A2RT18	255	1	EGFQMDEEREGCLVESDFRDSEREAHLLEAH	S	D	F	R	5	2	3	0.939374	-0.1664	NA	NA	NA	-0.551711	0.0884731	0.180098	STYX	0.386487	0.785173	-0.09438	0.801683	CENTER
A2RT18_359	tr|A2RT18|A2RT18_MOUSE	A2RT18	359	0.998	QEKLKKKHSYSFSPDSPTFTDEKHHRKASLK	S	P	T	F	5	2	3	0.501832	-0.0788659	NA	NA	NA	0.472245	1.17651	1.54307	STYX	0.211483	0.63304	1.06394	0.0152863	NR
A2RT18_399	tr|A2RT18|A2RT18_MOUSE	A2RT18	399	0.998	EYRYPHSCESLKYQISPIPLSSETCTSNVSS	S	P	I	P	6	3	3	0.0100275	-0.133391	0.0445191	NA	NA	0.355078	0.596958	0.732268	STYX	-0.0262815	0.490363	0.561435	0.0697685	CENTER
A2RT18_423	tr|A2RT18|A2RT18_MOUSE	A2RT18	423	0.988	CTSNVSSFVDSPTSKSPKSVTRKKSRRSITY	S	P	K	S	7	5	2	0.369072	0.630667	-0.60864	0.318925	-0.201161	0.495067	NA	0.0495805	STYX	0.101773	0.599936	0.272324	0.431686	CENTER
A2RT18_437 438 439	tr|A2RT18|A2RT18_MOUSE	A2RT18	437 438 439	0.898	KSPKSVTRKKSRRSITYSPEQGSQKCTRCFM SPKSVTRKKSRRSITYSPEQGSQKCTRCFME PKSVTRKKSRRSITYSPEQGSQKCTRCFMEI	T	Y	S	P	6	4	2	NA	-0.141029	-0.282851	-0.448732	0.18853	NA	0.393391	-0.25157	STYX	-0.171021	0.0849688	0.0709106	0.848887	CENTER
A2RT18_439	tr|A2RT18|A2RT18_MOUSE	A2RT18	439	0.997	PKSVTRKKSRRSITYSPEQGSQKCTRCFMEI	S	P	E	Q	8	5	3	0.219502	-0.165418	-0.361132	-0.552835	0.147444	0.267633	0.45336	-0.121557	STYX	-0.142488	0.214169	0.199812	0.468598	CENTER
A2RTS7_399 400	tr|A2RTS7|A2RTS7_MOUSE	A2RTS7	399 400	0.872	PGTLEKTLGRPKGGPSSPEVLPTAQEPLKGT GTLEKTLGRPKGGPSSPEVLPTAQEPLKGTN	S	S	P	E	6	3	3	0.734655	-0.142695	-0.0377545	NA	NA	0.570266	0.477181	0.616881	STYX	0.184735	0.954737	0.554776	0.0671514	CENTER
A6H6J9_177 178	tr|A6H6J9|A6H6J9_MOUSE	A6H6J9	177 178	0.887	QSAPSKMQSLTIRSNSSGGTGGGDLQPSLRG SAPSKMQSLTIRSNSSGGTGGGDLQPSLRGL	S	S	G	G	6	4	2	NA	0.36291	-0.0935858	0.174232	0.355475	-0.538722	0.0260054	NA	STYX	0.199758	0.18252	-0.256358	0.480046	CENTER
A6H6J9_178	tr|A6H6J9|A6H6J9_MOUSE	A6H6J9	178	0.976	SAPSKMQSLTIRSNSSGGTGGGDLQPSLRGL	S	G	G	T	6	4	2	-0.0252668	0.115338	NA	0.0823642	0.115234	0.101005	NA	-0.803181	STYX	0.0719175	0.579738	-0.351088	0.417814	CENTER
A6H6J9_356	tr|A6H6J9|A6H6J9_MOUSE	A6H6J9	356	0.988	MTQFDKRGPVAKSGSSPPKQTPAESQCKIVV	S	P	P	K	7	4	3	-0.756942	0.663957	0.0831989	-0.133119	NA	-0.166546	1.01985	0.498089	STYX	-0.0357264	0.66712	0.450465	0.221043	CENTER
A6X8I0_102	tr|A6X8I0|A6X8I0_MOUSE,tr|B1AZA0|B1AZA0_MOUSE,tr|B1B0R1|B1B0R1_MOUSE,tr|L7MUF1|L7MUF1_MOUSE,tr|Q497S0|Q497S0_MOUSE,tr|Q4KL04|Q4KL04_MOUSE,tr|Q4KL05|Q4KL05_MOUSE,tr|Q5M8P2|Q5M8P2_MOUSE,tr|Q62478|Q62478_MOUSE	A6X8I0	102	0.999	ENWNLLSGDQQVRNASELDLMEVQNPVTHDD	S	E	L	D	7	4	3	-0.291437	0.0345198	0.172828	0.513455	NA	0.0125749	0.249878	0.724041	STYX	0.107341	0.654618	0.328831	0.280429	CENTER
A6X8J1_51	tr|A6X8J1|A6X8J1_MOUSE,tr|Q9D515|Q9D515_MOUSE	A6X8J1	51	0.991	EENVSFSEEWQRFASSVETPIENRNLLSGEQ	S	V	E	T	7	5	2	-0.387156	-0.457639	0.139234	0.168028	0.191052	0.00682129	NA	0.16778	STYX	-0.0692961	0.727201	0.0873007	0.756869	CENTER
A6X8Z9_211	tr|A6X8Z9|A6X8Z9_MOUSE	A6X8Z9	211	0.999	QAGYRSYYKTLAHIESRTLTDTNDYRETGQR	S	R	T	L	5	3	2	0.147402	-0.465427	NA	NA	-1.22267	0.534863	NA	0.67691	STYX	-0.513565	0.127826	0.605887	0.113231	CENTER
A6X8Z9_235	tr|A6X8Z9|A6X8Z9_MOUSE	A6X8Z9	235	0.999	YRETGQRLQPCTFEDSEAELPSKVSTTEETE	S	E	A	E	4	2	2	0.273849	-0.233107	NA	NA	NA	NA	0.534838	0.719148	STYX	0.0203708	0.860065	0.626993	0.105684	CENTER
A6X8Z9_286	tr|A6X8Z9|A6X8Z9_MOUSE	A6X8Z9	286	0.993	HEKLPSITTKVYYSSSPEKIQTTEYTSDTTP	S	P	E	K	5	2	3	0.428332	0.0611085	NA	NA	NA	1.09332	1.52572	1.09909	STYX	0.24472	0.231296	1.23938	0.00601753	NR
A6ZI46_101	tr|A6ZI46|A6ZI46_MOUSE,tr|A6ZI47|A6ZI47_MOUSE,sp|P05064|ALDOA_MOUSE	A6ZI46	101	0.996	LAADESIGSMGNRLQSIGTENTEENRRFFRQ	S	I	G	T	8	5	3	-0.643022	0.180936	-0.208261	0.0282891	0.26854	-0.668068	-0.739313	-0.807744	STYX	-0.0747034	0.648288	-0.738375	0.021186	CENTER
A6ZI47_36	tr|A6ZI47|A6ZI47_MOUSE,sp|P05064|ALDOA_MOUSE	A6ZI47	36	0.989	RRIVAPGKGILAADESTGSIAKRLQSIGTEN	S	T	G	S	8	5	3	0.221075	-0.146658	0.0169879	-0.0753632	-0.418472	-1.20652	-0.735045	-0.913361	STYX	-0.0804862	0.221595	-0.951641	0.010082	NR
A6ZI47_36 37	tr|A6ZI47|A6ZI47_MOUSE,sp|P05064|ALDOA_MOUSE	A6ZI47	36 37	0.897	RRIVAPGKGILAADESTGSIAKRLQSIGTEN RIVAPGKGILAADESTGSIAKRLQSIGTENT	S	T	G	S	8	5	3	0.0984008	-0.0829643	-0.0881392	-0.0126842	-0.26714	-0.816138	-0.918508	-0.896752	STYX	-0.0705053	0.159965	-0.877133	0.0114863	NR
A6ZI47_39	tr|A6ZI47|A6ZI47_MOUSE,sp|P05064|ALDOA_MOUSE	A6ZI47	39	0.998	VAPGKGILAADESTGSIAKRLQSIGTENTEE	S	I	A	K	8	5	3	0.28605	0.0704406	-0.452652	0.00719677	0.00519911	-0.832708	-0.630455	-0.658049	STYX	-0.0167532	0.819249	-0.707071	0.0255146	CENTER
A7L3B_87	sp|Q3UD01|A7L3B_MOUSE	Q3UD01	87	0.988	LPLCSLPGDPGDGPQTELQRSPPEFQ_____	T	E	L	Q	5	3	2	0.159317	NA	0.45914	0.388577	NA	0.558359	NA	-0.0221626	STYX	0.335678	0.03235	0.268098	0.468514	CENTER
A7L3B_92	sp|Q3UD01|A7L3B_MOUSE	Q3UD01	92	0.999	LPGDPGDGPQTELQRSPPEFQ__________	S	P	P	E	8	5	3	0.455434	0.0949755	0.573692	0.559414	0.127452	0.0451141	-0.191179	0.682228	STYX	0.362193	0.0104636	0.178721	0.596517	CENTER
A7UAK5_490	tr|A7UAK5|A7UAK5_MOUSE	A7UAK5	490	0.999	KQDAKKGPNPLMRRNSVTPLASPEPTKKPRI	S	V	T	P	8	5	3	-0.558242	-0.163622	-0.120491	-0.0470831	-0.049437	-1.04153	-1.13278	-0.676297	STYX	-0.187775	0.0179793	-0.9502	0.0103579	NR
A7UAK5_496	tr|A7UAK5|A7UAK5_MOUSE	A7UAK5	496	0.999	GPNPLMRRNSVTPLASPEPTKKPRINSFEER	S	P	E	P	6	4	2	NA	0.0134074	-0.264834	-0.170911	0.404208	NA	-0.57962	-0.166186	STYX	-0.00453229	0.451702	-0.372903	0.290283	CENTER
A8DUK4_50 51	tr|A8DUK4|A8DUK4_MOUSE,sp|P02088|HBB1_MOUSE	A8DUK4	50 51	0.873	VYPWTQRYFDSFGDLSSASAIMGNAKVKAHG YPWTQRYFDSFGDLSSASAIMGNAKVKAHGK	S	S	A	S	6	3	3	0.25208	0.312103	NA	NA	-0.60433	0.165616	-0.0124276	-0.0035779	STYX	-0.013382	0.669285	0.04987	0.819097	CENTER
A8DUK4_53	tr|A8DUK4|A8DUK4_MOUSE,sp|P02088|HBB1_MOUSE	A8DUK4	53	0.998	WTQRYFDSFGDLSSASAIMGNAKVKAHGKKV	S	A	I	M	7	4	3	0.191357	-0.286029	-0.062009	NA	-0.475717	0.193741	-0.0239118	-0.0869223	STYX	-0.1581	0.134817	0.0276356	0.888508	CENTER
AAAT_518	sp|P51912|AAAT_MOUSE	P51912	518	0.999	MPSSEPELIQVKNEVSLNPLPLATEEGNPLL	S	L	N	P	5	2	3	0.174139	-0.223989	NA	NA	NA	-0.79121	-1.05842	-0.0492859	STYX	-0.0249251	0.69206	-0.632973	0.07745	CENTER
AAK1_20 21	sp|Q3UHJ0|AAK1_MOUSE	Q3UHJ0	20 21	0.884	FDSRREQGSSGLGSGSSGGGGSSSGLGSGYI DSRREQGSSGLGSGSSGGGGSSSGLGSGYIG	S	S	G	G	5	3	2	-1.09152	-0.392514	-0.0527699	NA	NA	-0.271658	-0.17317	NA	STYX	-0.512268	0.0204335	-0.222414	0.492968	CENTER
AAK1_21	sp|Q3UHJ0|AAK1_MOUSE	Q3UHJ0	21	0.998	DSRREQGSSGLGSGSSGGGGSSSGLGSGYIG	S	G	G	G	4	2	2	-0.995785	NA	0.147846	NA	NA	0.0747204	-0.134435	NA	STYX	-0.42397	0.496384	-0.0298572	0.945751	CENTER
AAK1_389	sp|Q3UHJ0|AAK1_MOUSE	Q3UHJ0	389	0.999	QTQPNPGILPIQPALTPRKRATVQPLPQAAG	T	P	R	K	7	4	3	NA	-0.129186	0.0923245	0.165517	-0.198875	0.267521	-0.0529137	0.420766	STYX	-0.0175547	0.541144	0.211791	0.432259	CENTER
AAK1_603 604	sp|Q3UHJ0|AAK1_MOUSE	Q3UHJ0	603 604	0.895	PGQIQAPVRQQPKVQTTPPPTIQGQKVGSLT GQIQAPVRQQPKVQTTPPPTIQGQKVGSLTP	T	T	P	P	8	5	3	-0.105514	-0.106641	-0.341957	-0.118612	-0.0549943	-0.244686	-0.277302	-0.433556	STYX	-0.145544	0.0162191	-0.318515	0.236235	CENTER
AAK1_604	sp|Q3UHJ0|AAK1_MOUSE	Q3UHJ0	604	0.994	GQIQAPVRQQPKVQTTPPPTIQGQKVGSLTP	T	P	P	P	8	5	3	0.022598	-0.0345477	-0.279853	-0.18047	0.0535732	-0.148087	-0.163324	-0.24448	STYX	-0.0837399	0.145496	-0.185297	0.485499	CENTER
AAK1_616 621 622	sp|Q3UHJ0|AAK1_MOUSE	Q3UHJ0	616 621 622	0.854	VQTTPPPTIQGQKVGSLTPPSSPKTQRAGHR PPTIQGQKVGSLTPPSSPKTQRAGHRRILSD PTIQGQKVGSLTPPSSPKTQRAGHRRILSDV	S	L	T	P	8	5	3	-0.0235673	0.129097	-0.00702587	-0.104852	0.082454	-0.0242105	-0.0550058	-0.468314	STYX	0.0152211	0.763253	-0.18251	0.519053	CENTER
AAK1_618	sp|Q3UHJ0|AAK1_MOUSE	Q3UHJ0	618	0.998	TTPPPTIQGQKVGSLTPPSSPKTQRAGHRRI	T	P	P	S	8	5	3	0.523524	0.0444468	-0.486781	-0.111809	-0.396941	0.039345	0.133312	-0.0371252	STYX	-0.085512	0.225971	0.0451771	0.831486	CENTER
AAK1_618 621 622	sp|Q3UHJ0|AAK1_MOUSE	Q3UHJ0	618 621 622	0.899	TTPPPTIQGQKVGSLTPPSSPKTQRAGHRRI PPTIQGQKVGSLTPPSSPKTQRAGHRRILSD PTIQGQKVGSLTPPSSPKTQRAGHRRILSDV	T	P	P	S	8	5	3	0.0387951	0.0793208	-0.209907	-0.0985045	0.0863822	-0.166384	-0.304371	-0.134047	STYX	-0.0207827	0.491702	-0.2016	0.448978	CENTER
AAK1_621 622	sp|Q3UHJ0|AAK1_MOUSE	Q3UHJ0	621 622	0.892	PPTIQGQKVGSLTPPSSPKTQRAGHRRILSD PTIQGQKVGSLTPPSSPKTQRAGHRRILSDV	S	S	P	K	7	4	3	NA	0.0314197	-0.0134392	0.347275	-0.0839423	-0.219306	0.374486	0.31076	STYX	0.0703284	0.948714	0.155313	0.570359	CENTER
AAK1_635	sp|Q3UHJ0|AAK1_MOUSE	Q3UHJ0	635	0.998	PSSPKTQRAGHRRILSDVTHSAVFGVPASKS	S	D	V	T	7	4	3	0.168516	-0.0822985	NA	0.674719	0.0243824	-1.04864	-1.24546	-1.13399	STYX	0.19633	0.437015	-1.1427	0.00523372	NR
AAK1_638	sp|Q3UHJ0|AAK1_MOUSE	Q3UHJ0	638	0.977	PKTQRAGHRRILSDVTHSAVFGVPASKSTQL	T	H	S	A	5	2	3	-0.125875	0.0718225	NA	NA	NA	-0.634409	-0.883622	-0.536654	STYX	-0.0270264	0.570471	-0.684895	0.0304034	CENTER
AAK1_650 651	sp|Q3UHJ0|AAK1_MOUSE	Q3UHJ0	650 651	0.891	SDVTHSAVFGVPASKSTQLLQAAAAEASLNK DVTHSAVFGVPASKSTQLLQAAAAEASLNKS	S	T	Q	L	5	3	2	-0.0311948	0.030406	-0.116094	NA	NA	-0.153574	-0.458405	NA	STYX	-0.0389609	0.370302	-0.30599	0.363108	CENTER
AAK1_668	sp|Q3UHJ0|AAK1_MOUSE	Q3UHJ0	668	0.996	LLQAAAAEASLNKSKSATTTPSGSPRTSQQN	S	A	T	T	7	4	3	-0.921142	-0.264424	0.0279231	0.0133345	NA	0.440216	0.575723	0.406893	STYX	-0.286077	0.0910686	0.474277	0.103676	CENTER
AAK1_670 671 672	sp|Q3UHJ0|AAK1_MOUSE	Q3UHJ0	670 671 672	0.88	QAAAAEASLNKSKSATTTPSGSPRTSQQNVS AAAAEASLNKSKSATTTPSGSPRTSQQNVSN AAAEASLNKSKSATTTPSGSPRTSQQNVSNA	T	T	T	P	7	5	2	-1.21495	0.976746	0.0980596	0.573889	0.365521	-0.17584	NA	-0.156577	STYX	0.159854	0.132664	-0.166208	0.609908	CENTER
AAK1_670 671 672 676	sp|Q3UHJ0|AAK1_MOUSE	Q3UHJ0	670 671 672 676	0.896	QAAAAEASLNKSKSATTTPSGSPRTSQQNVS AAAAEASLNKSKSATTTPSGSPRTSQQNVSN AAAEASLNKSKSATTTPSGSPRTSQQNVSNA ASLNKSKSATTTPSGSPRTSQQNVSNASEGS	T	T	T	P	4	2	2	-0.760327	1.36855	NA	NA	NA	-0.0981387	-0.525872	NA	STYX	0.304112	0.990919	-0.312005	0.373129	CENTER
AAK1_672	sp|Q3UHJ0|AAK1_MOUSE	Q3UHJ0	672	0.991	AAAEASLNKSKSATTTPSGSPRTSQQNVSNA	T	P	S	G	4	2	2	-0.28754	-0.556068	NA	NA	NA	0.0716237	NA	-0.239485	STYX	-0.421804	0.0222224	-0.0839304	0.812239	CENTER
AAK1_676	sp|Q3UHJ0|AAK1_MOUSE	Q3UHJ0	676	0.998	ASLNKSKSATTTPSGSPRTSQQNVSNASEGS	S	P	R	T	8	5	3	-0.0504411	-0.0566874	0.09632	-0.0129779	0.617412	-0.297133	-0.245588	-0.281739	STYX	0.118725	0.861918	-0.27482	0.298443	CENTER
AAKB1_108	sp|Q9R078|AAKB1_MOUSE	Q9R078	108	1	LSGSFNNWSKLPLTRSQNNFVAILDLPEGEH	S	Q	N	N	6	3	3	0.411657	-0.434131	-0.00745593	NA	NA	0.1505	-0.227378	-0.0360318	STYQ	-0.00997678	0.766238	-0.0376367	0.907871	CENTER
AAKB2_181 182 183	sp|Q6PAM0|AAKB2_MOUSE	Q6PAM0	181 182 183	0.889	KLDSMESSETSCRDLSSSPPGPYGQEMYVFR LDSMESSETSCRDLSSSPPGPYGQEMYVFRS DSMESSETSCRDLSSSPPGPYGQEMYVFRSE	S	S	S	P	8	5	3	0.391533	-0.279359	-0.0192662	0.0406476	-0.265714	0.286529	0.680154	0.389243	STYX	-0.0264317	0.385842	0.451975	0.124546	CENTER
AAKB2_183	sp|Q6PAM0|AAKB2_MOUSE	Q6PAM0	183	0.997	DSMESSETSCRDLSSSPPGPYGQEMYVFRSE	S	P	P	G	7	4	3	0.452074	-0.237496	-0.192213	0.0201506	NA	0.398022	0.643487	0.692973	STYX	0.0106288	0.475787	0.578161	0.0625352	CENTER
AAKG2_109 110	sp|Q91WG5|AAKG2_MOUSE	Q91WG5	109 110	0.882	RPKTSPGSPKTVFPFSYQESPPRSPRRMSFS PKTSPGSPKTVFPFSYQESPPRSPRRMSFSG	S	Y	Q	E	7	5	2	0.14291	-0.1767	-0.0820749	0.0075256	-0.113812	NA	-0.054809	0.0357787	STYX	-0.0444301	0.231013	-0.00951511	0.996276	CENTER
AAKG2_109 110 117	sp|Q91WG5|AAKG2_MOUSE	Q91WG5	109 110 117	0.88	RPKTSPGSPKTVFPFSYQESPPRSPRRMSFS PKTSPGSPKTVFPFSYQESPPRSPRRMSFSG PKTVFPFSYQESPPRSPRRMSFSGIFRSSSK	S	Y	Q	E	7	5	2	0.204541	0.0692528	0.254722	0.358131	0.389362	NA	0.0288762	-0.0483371	STYX	0.255202	0.0195881	-0.00973046	0.995884	CENTER
AAKG2_113	sp|Q91WG5|AAKG2_MOUSE	Q91WG5	113	0.999	SPGSPKTVFPFSYQESPPRSPRRMSFSGIFR	S	P	P	R	8	5	3	0.408649	-0.0394368	-0.168737	0.152948	-0.0810604	0.448447	0.332189	0.470437	STYX	0.0544725	0.83078	0.417024	0.137963	CENTER
AAKG2_117	sp|Q91WG5|AAKG2_MOUSE	Q91WG5	117	0.997	PKTVFPFSYQESPPRSPRRMSFSGIFRSSSK	S	P	R	R	6	4	2	NA	0.231022	-0.0137276	0.221318	-0.131576	0.0342079	NA	0.322124	STYX	0.0767589	0.740042	0.178166	0.572921	CENTER
AAKG2_122	sp|Q91WG5|AAKG2_MOUSE	Q91WG5	122	0.995	PFSYQESPPRSPRRMSFSGIFRSSSKESSPN	S	F	S	G	6	4	2	0.519581	-0.64305	NA	0.124423	-0.650975	0.630536	NA	0.262967	STYX	-0.162505	0.535258	0.446751	0.216214	CENTER
AAKG2_134 135	sp|Q91WG5|AAKG2_MOUSE	Q91WG5	134 135	0.898	RRMSFSGIFRSSSKESSPNSNPSTSPGGIRF RMSFSGIFRSSSKESSPNSNPSTSPGGIRFF	S	S	P	N	6	3	3	NA	NA	0.04611	0.0414537	0.295311	-0.0355218	-0.257382	0.286749	STYX	0.127625	0.396713	-0.00205179	0.99792	CENTER
AAKG2_135	sp|Q91WG5|AAKG2_MOUSE	Q91WG5	135	0.983	RMSFSGIFRSSSKESSPNSNPSTSPGGIRFF	S	P	N	S	6	3	3	NA	NA	-0.0127421	-0.0064599	0.345441	0.0898494	0.322584	0.0235643	STYX	0.108746	0.679345	0.145333	0.562936	CENTER
AAKG2_141 142 143	sp|Q91WG5|AAKG2_MOUSE	Q91WG5	141 142 143	0.896	IFRSSSKESSPNSNPSTSPGGIRFFSRSRKT FRSSSKESSPNSNPSTSPGGIRFFSRSRKTS RSSSKESSPNSNPSTSPGGIRFFSRSRKTSS	S	T	S	P	7	5	2	-0.79257	0.743825	-0.0771004	0.128675	0.606736	0.410866	NA	0.123769	STYX	0.121913	0.553216	0.267317	0.413873	CENTER
AAKG2_143	sp|Q91WG5|AAKG2_MOUSE	Q91WG5	143	0.994	RSSSKESSPNSNPSTSPGGIRFFSRSRKTSS	S	P	G	G	8	5	3	-0.489556	0.837057	-0.0718066	-0.0028291	0.160856	0.372374	0.503392	-0.181361	STYX	0.0867444	0.905896	0.231469	0.426715	CENTER
AAKG2_194 195 196	sp|Q91WG5|AAKG2_MOUSE	Q91WG5	194 195 196	0.899	SYKQEPERPESRIYASSSPPDTGQRFCLAFQ YKQEPERPESRIYASSSPPDTGQRFCLAFQS KQEPERPESRIYASSSPPDTGQRFCLAFQSP	S	S	S	P	8	5	3	0.0292661	0.537559	0.000361374	0.0878048	-0.0364934	-0.326721	0.181189	0.134951	STYX	0.1237	0.592897	-0.00352727	0.973814	CENTER
AAKG2_196	sp|Q91WG5|AAKG2_MOUSE	Q91WG5	196	0.996	KQEPERPESRIYASSSPPDTGQRFCLAFQSP	S	P	P	D	8	5	3	0.192548	0.0235506	0.0890804	-0.0266955	1.0618	0.442457	0.605625	1.1118	STYX	0.268056	0.254301	0.71996	0.0391085	CENTER
AAKG2_71	sp|Q91WG5|AAKG2_MOUSE	Q91WG5	71	0.997	EKHSSRKVDSPFSSGSPSRGLFSRGPQPRPS	S	P	S	R	8	5	3	0.452713	0.295105	0.0443312	0.150058	0.0240138	0.487139	0.858348	0.73852	STYX	0.193244	0.111591	0.694669	0.036005	CENTER
AAKG2_86 87	sp|Q91WG5|AAKG2_MOUSE	Q91WG5	86 87	0.89	SPSRGLFSRGPQPRPSSPVSAPVRPKTSPGS PSRGLFSRGPQPRPSSPVSAPVRPKTSPGSP	S	S	P	V	8	5	3	-0.277912	-0.0815101	-0.0377778	-0.0117916	-0.415048	0.866903	0.762034	0.349251	STYX	-0.164808	0.0282708	0.659396	0.0469413	CENTER
AAMDC_46	sp|Q8R0P4|AAMDC_MOUSE	Q8R0P4	46	0.999	GGSRAWDWRETGTEHSPGVQPADVKEVAEKG	S	P	G	V	7	4	3	0.0320385	0.160845	0.0637581	0.0095077	NA	0.536198	0.572366	0.207194	STYX	0.0665373	0.643871	0.438586	0.134031	CENTER
AAPK1_183	sp|Q5EG47|AAPK1_MOUSE,sp|Q8BRK8|AAPK2_MOUSE	Q5EG47	183	0.991	DFGLSNMMSDGEFLRTSCGSPNYAAPEVISG	T	S	C	G	5	2	3	-0.105751	0.340422	NA	NA	NA	-0.188549	-0.337073	-0.402412	STYX	0.117335	0.82178	-0.309345	0.248296	CENTER
AAPK1_183 184	sp|Q5EG47|AAPK1_MOUSE,sp|Q8BRK8|AAPK2_MOUSE	Q5EG47	183 184	0.897	DFGLSNMMSDGEFLRTSCGSPNYAAPEVISG FGLSNMMSDGEFLRTSCGSPNYAAPEVISGR	T	S	C	G	4	2	2	0.146858	0.210501	NA	NA	NA	NA	-0.884139	-0.166241	STYX	0.178679	0.209538	-0.52519	0.19607	CENTER
AAPK1_187	sp|Q5EG47|AAPK1_MOUSE,sp|Q8BRK8|AAPK2_MOUSE	Q5EG47	187	0.952	SNMMSDGEFLRTSCGSPNYAAPEVISGRLYA	S	P	N	Y	5	2	3	NA	0.190226	0.284301	NA	NA	0.00225405	-0.788175	-0.366101	STYX	0.237264	0.123773	-0.384007	0.214109	CENTER
AAPK1_486	sp|Q5EG47|AAPK1_MOUSE	Q5EG47	486	0.996	LLDFRSIDDEITEAKSGTATPQRSGSISNYR	S	G	T	A	7	5	2	-0.095905	1.74994	-0.13113	-0.0319139	-0.0212031	NA	0.798798	-1.03308	STYX	0.293957	0.566461	-0.117141	0.871529	CENTER
AAPK1_496	sp|Q5EG47|AAPK1_MOUSE	Q5EG47	496	0.996	ITEAKSGTATPQRSGSISNYRSCQRSDSDAE	S	I	S	N	8	5	3	0.0582583	0.0576657	-0.112403	-0.299869	0.288876	-1.14145	-1.20512	-1.17481	STYX	-0.00149442	0.677137	-1.17379	0.00483102	NR
AAPK2_377	sp|Q8BRK8|AAPK2_MOUSE	Q8BRK8	377	1	GLKPHPERMPPLIADSPKARCPLDALNTTKP	S	P	K	A	4	2	2	NA	-0.516134	NA	NA	-0.134936	-0.279892	NA	-0.244348	STYX	-0.325535	0.0448543	-0.26212	0.418003	CENTER
AAPK2_491	sp|Q8BRK8|AAPK2_MOUSE	Q8BRK8	491	0.995	VVEQRSGSSTPQRSCSAAGLHRARSSFDSST	S	A	A	G	8	5	3	0.103446	-0.365298	0.225379	0.434784	0.140366	-0.170952	0.0066791	0.239042	STYX	0.107735	0.334884	0.024923	0.906812	CENTER
AARD_55 56	sp|Q811W1|AARD_MOUSE	Q811W1	55 56	0.895	GTWRIGIEVPEHVRASSPVLEHLRRQLERAF TWRIGIEVPEHVRASSPVLEHLRRQLERAFQ	S	S	P	V	6	4	2	-0.0648507	-0.809998	-0.00192373	NA	-0.337749	-0.811879	NA	-0.532079	STYX	-0.30363	0.0310868	-0.671979	0.0803632	CENTER
AARD_56	sp|Q811W1|AARD_MOUSE	Q811W1	56	0.987	TWRIGIEVPEHVRASSPVLEHLRRQLERAFQ	S	P	V	L	5	2	3	0.538385	-0.00255793	NA	NA	NA	-1.20025	-0.554211	-0.496367	STYX	0.267913	0.362417	-0.750275	0.0303932	CENTER
AB17A_302	sp|Q99JW1|AB17A_MOUSE	Q99JW1	302	0.999	IELYSQYLERLRRFISQELPSQRA_______	S	Q	E	L	7	5	2	0.255503	-0.261064	-0.0858524	0.173282	-0.243318	NA	0.282192	0.165383	STYQ	-0.03229	0.413363	0.223788	0.469218	CENTER
AB1IP_507	sp|Q8R5A3|AB1IP_MOUSE	Q8R5A3	507	0.998	QIETTKDEKQGLGNHSPGATRENHRPKSSLP	S	P	G	A	8	5	3	-0.354622	-0.0629739	-0.00523845	-0.0693228	-0.523054	-0.589099	-0.357088	-0.29627	STYX	-0.203042	0.0227133	-0.414152	0.138425	CENTER
AB1IP_537	sp|Q8R5A3|AB1IP_MOUSE	Q8R5A3	537	0.999	PPPPPPVRRSSDTCGSPALPSKVKGPGTCTF	S	P	A	L	7	4	3	-0.3525	0.486188	0.266439	NA	-0.0216394	-0.334476	0.0646386	0.583824	STYX	0.0946219	0.733668	0.104662	0.752496	CENTER
ABCAH_1697	sp|E9PX95|ABCAH_MOUSE	E9PX95	1697	0.995	SSTKEQIQQEQAVLASPSPPSNSRPISSPPS	S	P	S	P	5	3	2	-0.71525	NA	0.428047	NA	-0.353071	0.279113	0.0918494	NA	STYX	-0.213425	0.280966	0.185481	0.547233	CENTER
ABCF1_107	sp|Q6P542|ABCF1_MOUSE	Q6P542	107	0.999	ERVLMERLKQLSVPASDEEDEVPAPIPRGRK	S	D	E	E	8	5	3	0.190074	0.172876	0.137782	0.175976	-0.00907006	-0.0614256	-0.0828501	-0.139583	STYX	0.133528	0.164665	-0.0946196	0.732182	CENTER
ABCF1_138	sp|Q6P542|ABCF1_MOUSE	Q6P542	138	1	KAKGGNVFEALIQDDSEEEEEEEENRVLKPA	S	E	E	E	4	2	2	0.0982959	0.158998	NA	NA	NA	NA	-0.428306	0.250304	STYX	0.128647	0.359318	-0.0890007	0.812112	CENTER
ABCF1_194	sp|Q6P542|ABCF1_MOUSE	Q6P542	194	0.999	EKSKGKAKSKPAAADSEGEEEEEDTAKEKEP	S	E	G	E	8	5	3	-0.253052	2.21115	0.00701189	0.000661907	-0.187654	-0.216366	0.00477042	-0.235083	STYX	0.355623	0.492028	-0.148893	0.577921	CENTER
ABCF1_21 22	sp|Q6P542|ABCF1_MOUSE	Q6P542	21 22	0.89	KQQPPEPEWIGDGEGTSPADKVVKKGKKDKK QQPPEPEWIGDGEGTSPADKVVKKGKKDKKT	T	S	P	A	7	5	2	0.197253	0.449547	0.38267	0.315786	0.209092	-0.08058	-0.414191	NA	STYX	0.31087	0.00593786	-0.247386	0.462508	CENTER
ABCF3_543	sp|Q8K268|ABCF3_MOUSE	Q8K268	543	1	GAGKSTMLKLLMGDLSPVRGIRHAHRNLKIG	S	P	V	R	7	4	3	1.00525	-0.622107	NA	0.244814	-0.364723	0.173143	0.195192	0.0623327	STYX	0.0658078	0.795751	0.143556	0.546984	CENTER
ABHD2_415	sp|Q9QXM0|ABHD2_MOUSE	Q9QXM0	415	0.986	YANAICQWERNKSQCSDTEQMEAELE_____	S	D	T	E	8	5	3	0.0475525	-0.108795	0.238602	0.371727	0.20882	0.0254592	-0.125552	-0.508582	STYX	0.151581	0.241668	-0.202892	0.480244	CENTER
ABI1_183	sp|Q8CBW3|ABI1_MOUSE	Q8CBW3	183	0.999	TGTLSRTNPPTQKPPSPPVSGRGTLGRNTPY	S	P	P	V	8	5	3	-0.739526	0.317298	-0.168224	-0.198013	0.103894	-0.933827	-1.08937	-1.09634	STYX	-0.136914	0.250694	-1.03985	0.00680079	NR
ABI1_215 216	sp|Q8CBW3|ABI1_MOUSE	Q8CBW3	215 216	0.885	TLEPVKPPTVPNDYMTSPARLGSQHSPGRTA LEPVKPPTVPNDYMTSPARLGSQHSPGRTAS	T	S	P	A	4	2	2	-0.273868	NA	0.329931	NA	NA	-0.640933	NA	-1.15213	STYX	0.0280314	0.882503	-0.896531	0.0447844	NR
ABI1_222	sp|Q8CBW3|ABI1_MOUSE	Q8CBW3	222	0.993	PTVPNDYMTSPARLGSQHSPGRTASLNQRPR	S	Q	H	S	7	5	2	-0.3799	-0.623212	0.219954	0.0657034	-0.206669	-0.85668	NA	-0.569151	STYQ	-0.184825	0.127256	-0.712915	0.0691866	CENTER
ABI1_225	sp|Q8CBW3|ABI1_MOUSE	Q8CBW3	225	0.999	PNDYMTSPARLGSQHSPGRTASLNQRPRTHS	S	P	G	R	6	3	3	-0.657545	-0.523703	NA	NA	0.789071	0.0699968	0.178387	-0.456115	STYX	-0.130726	0.312706	-0.0692438	0.846011	CENTER
ABI1_265	sp|Q8CBW3|ABI1_MOUSE	Q8CBW3	265	0.992	ENSGSSSIGIPIAVPTPSPPTAGPAAPGAAP	T	P	S	P	5	2	3	-0.633194	0.378651	NA	NA	NA	0.0278219	0.21128	0.0634056	STYX	-0.127272	0.824966	0.100836	0.66695	CENTER
ABI1_285 286 287 288 289 290 291 303	sp|Q8CBW3|ABI1_MOUSE	Q8CBW3	285 286 287 288 289 290 291 303	0.88	TAGPAAPGAAPGSQYGTMTRQISRHNSTTSS AGPAAPGAAPGSQYGTMTRQISRHNSTTSST GPAAPGAAPGSQYGTMTRQISRHNSTTSSTS PAAPGAAPGSQYGTMTRQISRHNSTTSSTSS AAPGAAPGSQYGTMTRQISRHNSTTSSTSSG APGAAPGSQYGTMTRQISRHNSTTSSTSSGG PGAAPGSQYGTMTRQISRHNSTTSSTSSGGY TRQISRHNSTTSSTSSGGYRRTPSVAAQFSA	G	T	M	T	5	2	3	-1.25367	-0.156256	NA	NA	NA	-0.0589046	0.542304	-0.282794	STYX	-0.704961	0.0356552	0.0668683	0.861009	CENTER
ABI2_177	sp|P62484|ABI2_MOUSE	P62484	177	0.999	MGGLPRTTPPTQKPPSPPMSGKGTLGRHSPY	S	P	P	M	8	5	3	-0.606873	0.169435	-0.0965346	-0.186834	-0.0505433	-0.636358	-0.76101	-0.69918	STYX	-0.15427	0.0908721	-0.698849	0.02578	CENTER
ABI2_190	sp|P62484|ABI2_MOUSE	P62484	190	0.984	PPSPPMSGKGTLGRHSPYRTLEPVRPPVVPN	S	P	Y	R	6	3	3	-0.573385	-1.40196	0.796349	NA	NA	-0.196179	0.00873661	-0.525424	STYX	-0.392998	0.304763	-0.237622	0.401198	CENTER
ABI2_218	sp|P62484|ABI2_MOUSE	P62484	218	0.886	VPNDYVPSPTRNMAPSQQSPVRTASVNQRNR	S	Q	Q	S	7	5	2	-0.207345	0.0934504	0.118958	-0.0960634	0.157008	-0.343894	NA	0.00213771	STYQ	0.0132015	0.824083	-0.170878	0.609105	CENTER
ABI2_221	sp|P62484|ABI2_MOUSE	P62484	221	0.998	DYVPSPTRNMAPSQQSPVRTASVNQRNRTYS	S	P	V	R	8	5	3	-0.244162	0.107501	-0.00361352	-0.019076	0.214793	-0.323563	-0.197923	-0.283842	STYX	0.0110887	0.803108	-0.268443	0.310149	CENTER
ABI2_227	sp|P62484|ABI2_MOUSE	P62484	227	0.994	TRNMAPSQQSPVRTASVNQRNRTYSSSGSSG	S	V	N	Q	4	2	2	-1.5338	0.498065	NA	NA	NA	0.0878423	NA	-0.258381	STYX	-0.517868	0.883279	-0.0852694	0.812112	CENTER
ABI2_301	sp|P62484|ABI2_MOUSE	P62484	301	0.997	MNRPASRHTPPTIGGSLPYRRPPSITSQTSL	S	L	P	Y	5	2	3	-0.119342	-0.273032	NA	NA	NA	-0.547871	-0.634393	-0.160099	STYX	-0.196187	0.0660145	-0.447454	0.127025	CENTER
ABL1_547	sp|P00520|ABL1_MOUSE	P00520	547	0.999	TRTCRRAAEQKDAPDTPELLHTKGLGESDAL	T	P	E	L	6	3	3	0.622943	-0.110666	NA	0.275993	NA	0.109047	0.543061	1.06614	STYX	0.262757	0.307924	0.572749	0.101341	CENTER
ABL1_569	sp|P00520|ABL1_MOUSE	P00520	569	0.999	KGLGESDALDSEPAVSPLLPRKERGPPDGSL	S	P	L	L	8	5	3	0.13531	-0.181473	0.0480199	0.202708	-0.147595	-0.536136	-0.47309	-0.287004	STYX	0.011394	0.747667	-0.432077	0.122623	CENTER
ABL1_656	sp|P00520|ABL1_MOUSE	P00520	656	0.983	LCNGPPALTSDAAEPTKSPKASNGAGVPNGA	T	K	S	P	6	4	2	NA	0.328887	0.113919	0.205448	-0.0977319	-0.0880222	NA	-0.356974	STYX	0.137631	0.336784	-0.222498	0.501999	CENTER
ABL1_658	sp|P00520|ABL1_MOUSE	P00520	658	0.995	NGPPALTSDAAEPTKSPKASNGAGVPNGAFR	S	P	K	A	7	5	2	0.0699522	0.13948	-0.246718	0.123332	-0.231729	-0.0802106	-0.0377351	NA	STYX	-0.0291368	0.56506	-0.0589728	0.86908	CENTER
ABL2_621	sp|Q4JIM5|ABL2_MOUSE	Q4JIM5	621	0.999	SAPAGFIRSTQASSGSPALPRKQRDKSPSSL	S	P	A	L	8	5	3	-0.0819037	-0.018732	0.219696	0.106354	0.278422	-0.0915103	0.272021	-0.22959	STYX	0.100767	0.488316	-0.0163597	0.960383	CENTER
ABL2_632	sp|Q4JIM5|ABL2_MOUSE	Q4JIM5	632	0.996	ASSGSPALPRKQRDKSPSSLLEDAKETCFTR	S	P	S	S	8	5	3	0.596378	0.207286	0.0519778	0.19419	-0.0942442	-0.61255	-0.382773	-0.540789	STYX	0.191118	0.21551	-0.512037	0.0754513	CENTER
ABL2_72	sp|Q4JIM5|ABL2_MOUSE	Q4JIM5	72	0.986	SCVEDGFEGDKTGGSSPEVLHRPFGCDAESQ	S	P	E	V	4	2	2	0.157738	0.338299	NA	NA	NA	-0.146399	NA	0.114049	STYX	0.248019	0.131593	-0.016175	0.981643	CENTER
ABL2_785 786 787 788	sp|Q4JIM5|ABL2_MOUSE	Q4JIM5	785 786 787 788	0.887	PTASDDTSKPFPRSNSTSSMSSGLPEQDRMA TASDDTSKPFPRSNSTSSMSSGLPEQDRMAM ASDDTSKPFPRSNSTSSMSSGLPEQDRMAMT SDDTSKPFPRSNSTSSMSSGLPEQDRMAMTL	S	T	S	S	7	5	2	-0.212498	0.192386	-0.136589	0.668492	0.0533756	-0.160299	-0.737119	NA	STYX	0.113033	0.942662	-0.448709	0.235019	CENTER
ABL2_819 820 821 822	sp|Q4JIM5|ABL2_MOUSE	Q4JIM5	819 820 821 822	0.899	PRNCQRSKLQLERTVSTSSQPEENVDRANDM RNCQRSKLQLERTVSTSSQPEENVDRANDML NCQRSKLQLERTVSTSSQPEENVDRANDMLP CQRSKLQLERTVSTSSQPEENVDRANDMLPK	S	T	S	S	6	4	2	-0.510393	0.259601	NA	0.0208554	0.099029	-0.345721	NA	-1.06926	STYX	-0.0327268	0.959875	-0.70749	0.0990775	CENTER
ABL2_936	sp|Q4JIM5|ABL2_MOUSE	Q4JIM5	936	0.997	AVLPTTHNHKVPVLISPTLKHTPADVQLIGT	S	P	T	L	5	2	3	1.28464	-0.63668	NA	NA	NA	0.237621	0.00868731	0.155353	STYX	0.323979	0.992748	0.133887	0.582315	CENTER
ABLM1_216	sp|Q8K4G5|ABLM1_MOUSE	Q8K4G5	216	0.974	GRDCLCQLCAQPMSSSPKEASCSSNCAGCGR	S	P	K	E	5	2	3	0.0150121	0.302017	NA	NA	NA	-0.323526	-0.822325	-0.493292	STYX	0.158514	0.41772	-0.546381	0.0709303	CENTER
ABLM1_470	sp|Q8K4G5|ABLM1_MOUSE	Q8K4G5	470	0.999	TSGYEDKQERQSLGESPRTLSPTPSAEGYQD	S	P	R	T	7	5	2	-0.0126425	0.0883396	0.0906674	0.481851	-0.206881	0.142169	NA	-0.0294582	STYX	0.0882668	0.779094	0.0563556	0.834286	CENTER
ABLM1_475	sp|Q8K4G5|ABLM1_MOUSE	Q8K4G5	475	0.991	DKQERQSLGESPRTLSPTPSAEGYQDVRDRM	S	P	T	P	8	5	3	-0.177509	0.0240457	-0.0336332	-0.226363	0.0978403	-0.681879	-0.79528	-0.908475	STYX	-0.0631237	0.203812	-0.795211	0.0168013	CENTER
ABLM1_479	sp|Q8K4G5|ABLM1_MOUSE	Q8K4G5	479	0.998	RQSLGESPRTLSPTPSAEGYQDVRDRMIHRS	S	A	E	G	5	3	2	0.486797	0.0404845	0.0108088	NA	NA	NA	-0.537603	-0.266886	STYX	0.179364	0.406393	-0.402245	0.241801	CENTER
ABLM1_494 495 496	sp|Q8K4G5|ABLM1_MOUSE	Q8K4G5	494 495 496	0.896	SAEGYQDVRDRMIHRSTSQGSINSPVYSRHS AEGYQDVRDRMIHRSTSQGSINSPVYSRHSY EGYQDVRDRMIHRSTSQGSINSPVYSRHSYT	S	T	S	Q	8	5	3	0.00324409	0.14691	-0.225061	-0.285968	0.23158	-0.0983036	-0.510441	-0.625777	STYX	-0.0258588	0.546927	-0.411507	0.160598	CENTER
ABLM1_496	sp|Q8K4G5|ABLM1_MOUSE	Q8K4G5	496	0.997	EGYQDVRDRMIHRSTSQGSINSPVYSRHSYT	S	Q	G	S	8	5	3	-0.0648564	0.0331759	-0.166157	-0.407458	0.254791	-0.630013	-0.852289	-0.614852	STYQ	-0.0701011	0.264759	-0.699051	0.0271617	CENTER
ABLM1_670	sp|Q8K4G5|ABLM1_MOUSE	Q8K4G5	670	0.994	GPPSLAAVGTDPRRRSSGREEDEEELLRRRQ	S	S	G	R	5	2	3	0.184108	-0.146036	NA	NA	NA	-0.903297	-0.680768	-0.653178	STYX	0.019036	0.838891	-0.745748	0.0216322	CENTER
ABLM1_670 671	sp|Q8K4G5|ABLM1_MOUSE	Q8K4G5	670 671	0.895	GPPSLAAVGTDPRRRSSGREEDEEELLRRRQ PPSLAAVGTDPRRRSSGREEDEEELLRRRQL	S	S	G	R	8	5	3	-0.129211	-0.311627	-0.0313635	-0.106157	0.0777894	-0.756271	-0.392265	-0.598024	STYX	-0.100114	0.0854288	-0.582187	0.0529799	CENTER
ABRX2_280	sp|Q3TCJ1|ABRX2_MOUSE	Q3TCJ1	280	0.994	LLSRQMPSESLEPAFSPRMSYSGFSAEGRST	S	P	R	M	8	5	3	0.139844	-0.13946	-0.0118382	0.0356565	-0.137867	0.179695	0.000728983	0.473641	STYX	-0.0227329	0.392859	0.218022	0.418362	CENTER
ABTB2_364 365	sp|Q7TQI7|ABTB2_MOUSE	Q7TQI7	364 365	0.866	RAMHHMQGRHPLCPGTSPARQARQPPQPITW AMHHMQGRHPLCPGTSPARQARQPPQPITWS	T	S	P	A	7	4	3	-0.0427619	-0.0631146	0.228953	NA	-0.0335806	-0.161819	3.89e-05	-0.797479	STYX	0.0223739	0.713362	-0.319753	0.319808	CENTER
ACACA_76 77	sp|Q5SWU9|ACACA_MOUSE	Q5SWU9	76 77	0.885	LGISGLQDGLAFHMRSSMSGLHLVKQGRDRK GISGLQDGLAFHMRSSMSGLHLVKQGRDRKK	S	S	M	S	7	4	3	0.0780222	0.172511	NA	-0.00498133	0.220751	0.474026	-0.107012	-0.527853	STYX	0.116576	0.315063	-0.0536133	0.846325	CENTER
ACACA_79	sp|Q5SWU9|ACACA_MOUSE	Q5SWU9	79	0.999	SGLQDGLAFHMRSSMSGLHLVKQGRDRKKID	S	G	L	H	8	5	3	0.374354	-0.423912	-0.0209825	-0.163348	0.306748	-0.345012	-0.664258	-0.612766	STYX	0.0145717	0.764833	-0.540679	0.0666736	CENTER
ACACB_1332	sp|E9Q4Z2|ACACB_MOUSE	E9Q4Z2	1332	0.994	LPSSHPNRMAVPISVSNPDLLRHSTELFMDS	S	N	P	D	7	4	3	1.13217	-0.076393	NA	-0.295599	-0.397476	-0.236406	-0.842491	0.0788263	STYX	0.0906749	0.243213	-0.333357	0.313283	CENTER
ACACB_136	sp|E9Q4Z2|ACACB_MOUSE	E9Q4Z2	136	0.993	NGLSFPARPPSQRTVSPSREDRKQAHIKRQL	S	P	S	R	7	4	3	-0.172038	1.08695	1.87434	0.262275	NA	0.47573	0.360113	-0.244558	STYX	0.76288	0.101367	0.197095	0.495423	CENTER
ACAD9_478	sp|Q8JZN5|ACAD9_MOUSE	Q8JZN5	478	1	NVTTVMETIGRKLRDSLGRTVDLGLTGDLGV	S	L	G	R	7	4	3	0.281098	-0.505955	-0.271176	0.229142	NA	-0.131153	-0.359169	-0.312093	STYX	-0.0667227	0.656123	-0.267472	0.316309	CENTER
ACADL_54 55	sp|P51174|ACADL_MOUSE	P51174	54 55	0.899	PSAKKLTDVGIRRIFSSEHDIFRESVRKFFQ SAKKLTDVGIRRIFSSEHDIFRESVRKFFQE	S	S	E	H	6	3	3	0.714182	-0.539555	NA	-0.229314	NA	-0.919245	-0.0942925	-0.216174	STYX	-0.018229	0.381183	-0.409904	0.212241	CENTER
ACADL_55	sp|P51174|ACADL_MOUSE	P51174	55	0.986	SAKKLTDVGIRRIFSSEHDIFRESVRKFFQE	S	E	H	D	5	2	3	0.54083	-0.208821	NA	NA	NA	-0.9576	-0.809628	-0.582003	STYX	0.166005	0.921662	-0.783077	0.0190732	CENTER
ACAP2_378 379	sp|Q6ZQK5|ACAP2_MOUSE	Q6ZQK5	378 379	0.887	AYREKGDESEKLDKKSSPSTGSLDSGNESKE YREKGDESEKLDKKSSPSTGSLDSGNESKEK	S	S	P	S	7	4	3	NA	0.448523	-0.216264	-0.227738	-0.0269376	-0.194372	0.400002	-0.395834	STYX	-0.00560431	0.355332	-0.0634011	0.800339	CENTER
ACAP2_379	sp|Q6ZQK5|ACAP2_MOUSE	Q6ZQK5	379	0.99	YREKGDESEKLDKKSSPSTGSLDSGNESKEK	S	P	S	T	6	3	3	0.0650339	0.277583	0.146377	NA	NA	-0.400153	-0.102628	-0.363034	STYX	0.162998	0.197441	-0.288605	0.286612	CENTER
ACAP2_384	sp|Q6ZQK5|ACAP2_MOUSE	Q6ZQK5	384	0.996	DESEKLDKKSSPSTGSLDSGNESKEKLLKGE	S	L	D	S	7	4	3	0.0597627	0.20702	0.0493944	NA	0.406028	-0.547894	-0.478508	-0.822486	STYX	0.180551	0.159213	-0.616296	0.0437603	CENTER
ACAP2_387	sp|Q6ZQK5|ACAP2_MOUSE	Q6ZQK5	387	0.963	EKLDKKSSPSTGSLDSGNESKEKLLKGESAL	S	G	N	E	4	2	2	NA	NA	0.114774	-0.173043	NA	-0.0508696	-0.233998	NA	STYX	-0.0291343	0.610138	-0.142434	0.665914	CENTER
ACATN_16	sp|Q99J27|ACATN_MOUSE	Q99J27	16	0.997	MSPTISHKDSSRQRRSGMFSHALDMKSGPLP	S	G	M	F	8	5	3	0.507712	-0.28596	-0.115629	0.122902	-0.484819	-0.477604	-0.58374	-0.834358	STYX	-0.0511588	0.342728	-0.631901	0.040266	CENTER
ACBD5_395	sp|Q5XG73|ACBD5_MOUSE	Q5XG73	395	1	FSSVRRGRGNRIPHLSEGPKGRQVGSGGDGE	S	E	G	P	6	3	3	0.8815	-0.235678	0.066251	NA	NA	-0.492139	-0.582784	-0.401515	STYX	0.237358	0.7856	-0.492146	0.0835627	CENTER
ACBD5_418	sp|Q5XG73|ACBD5_MOUSE	Q5XG73	418	0.998	VGSGGDGERWGSDRGSRGSLNEQIALVLIRL	S	R	G	S	5	2	3	0.295031	0.318802	NA	NA	NA	-0.941506	-0.619439	0.0416857	STYX	0.306916	0.0718341	-0.50642	0.136936	CENTER
ACBG1_42	sp|Q99PU5|ACBG1_MOUSE	Q99PU5	42	0.987	QGASLGTSQDNSQTSSLIDGQTLSKESPSHG	S	L	I	D	4	2	2	-0.719272	0.545749	NA	NA	NA	-0.562609	-0.797315	NA	STYX	-0.0867616	0.909968	-0.679962	0.076476	CENTER
ACBG1_55	sp|Q99PU5|ACBG1_MOUSE	Q99PU5	55	0.986	TSSLIDGQTLSKESPSHGLELSAPEKARAAS	S	H	G	L	5	2	3	0.179001	-0.000585805	NA	NA	NA	-0.569194	-0.305852	-0.171448	STYX	0.0892075	0.642983	-0.348832	0.211996	CENTER
ACBG1_70	sp|Q99PU5|ACBG1_MOUSE	Q99PU5	70	1	SHGLELSAPEKARAASLDGAEEALWTTRADG	S	L	D	G	8	5	3	0.214108	0.0307152	0.160118	0.349883	0.111431	-0.581808	-0.729531	-0.44971	STYX	0.173251	0.0925263	-0.587017	0.0493174	CENTER
ACBG1_703	sp|Q99PU5|ACBG1_MOUSE	Q99PU5	703	1	ISGGELGPTMKLKRLTVLEKYKDIIDSFYQE	T	V	L	E	7	4	3	-0.0551414	-0.298054	NA	0.352	-0.777148	-0.570058	-0.88005	-0.7263	STYX	-0.194586	0.194702	-0.725469	0.0238382	CENTER
ACBG2_575	sp|Q2XU92|ACBG2_MOUSE	Q2XU92	575	0.999	KCETDRKSGEPLNKLSVEAKSFCQMLGSQAT	S	V	E	A	8	5	3	-0.21613	-0.14315	0.223295	-0.333068	-0.0565941	-0.285889	-0.64651	-1.23605	STYX	-0.10513	0.0866785	-0.722817	0.0435373	CENTER
ACD_24 25	sp|Q5EE38|ACD_MOUSE	Q5EE38	24 25	0.896	LQPWIRELILGSETLSSPRTGQLLKVLQDSE QPWIRELILGSETLSSPRTGQLLKVLQDSET	S	S	P	R	7	4	3	NA	-0.0435797	0.0131504	0.00131582	-0.185246	0.455116	0.249773	1.18546	STYX	-0.0535898	0.25298	0.630117	0.0768682	CENTER
ACD_25	sp|Q5EE38|ACD_MOUSE	Q5EE38	25	0.993	QPWIRELILGSETLSSPRTGQLLKVLQDSET	S	P	R	T	8	5	3	0.772743	-0.150808	0.55239	-0.00933776	-0.276645	0.383408	0.0335629	0.449328	STYX	0.177669	0.951649	0.288766	0.296521	CENTER
ACD_298	sp|Q5EE38|ACD_MOUSE	Q5EE38	298	0.997	PPAVGSTSPRAQAPTSPPCNSTPSSLLLNCS	S	P	P	C	4	2	2	-0.137975	-0.164276	NA	NA	NA	NA	-0.166096	0.102605	STYX	-0.151126	0.0838214	-0.0317454	0.941971	CENTER
ACE_1305	sp|P09470|ACE_MOUSE	P09470	1305	1	NHHSLRRPHRGPQFGSEVELRHS________	S	E	V	E	8	5	3	0.0274439	-0.376893	0.205122	0.194748	-0.357662	-0.160163	-0.196933	0.0982281	STYX	-0.0614484	0.561215	-0.086289	0.758798	CENTER
ACINU_1003	sp|Q9JIX8|ACINU_MOUSE	Q9JIX8	1003	1	VSITIDDPVRTAQVPSPPRGKISNIVHISNL	S	P	P	R	8	5	3	0.055239	-0.129487	-0.273772	-0.163189	-0.323355	0.0877134	0.0772493	-0.628337	STYX	-0.166913	0.0176006	-0.154458	0.655031	CENTER
ACINU_1328 1329	sp|Q9JIX8|ACINU_MOUSE	Q9JIX8	1328 1329	0.889	RDRRDTKRHSRSRSRSTPVRDRGGRR_____ DRRDTKRHSRSRSRSTPVRDRGGRR______	S	T	P	V	4	2	2	-1.18373	0.988647	NA	NA	NA	2.67008	NA	2.188	STYX	-0.0975411	0.97015	2.42904	0.0150579	NR
ACINU_1329	sp|Q9JIX8|ACINU_MOUSE	Q9JIX8	1329	0.993	DRRDTKRHSRSRSRSTPVRDRGGRR______	T	P	V	R	6	3	3	-1.76615	0.249736	2.56909	NA	NA	2.68049	2.1397	2.0084	STYX	0.350894	0.509995	2.2762	0.00297557	NR
ACINU_216	sp|Q9JIX8|ACINU_MOUSE	Q9JIX8	216	1	HSPRKSSSFSEEKGESDDEKPRKGERRSSRV	S	D	D	E	8	5	3	-0.117991	0.11676	-0.127263	-0.268179	0.0794372	0.249737	0.361075	0.0519828	STYX	-0.0634471	0.2191	0.220932	0.396192	CENTER
ACINU_389	sp|Q9JIX8|ACINU_MOUSE	Q9JIX8	389	0.983	ENEVKSSQSLEEKSQSPSPPPLPEDLEKAPV	S	P	S	P	6	3	3	0.808266	0.176666	-0.0671717	NA	NA	0.312464	0.39091	0.609066	STYX	0.30592	0.306783	0.43748	0.129643	CENTER
ACINU_391	sp|Q9JIX8|ACINU_MOUSE	Q9JIX8	391	0.998	EVKSSQSLEEKSQSPSPPPLPEDLEKAPVVL	S	P	P	P	6	3	3	0.653463	0.180187	0.106613	NA	NA	0.174931	0.356167	0.574648	STYX	0.313421	0.0794458	0.368582	0.191738	CENTER
ACINU_413	sp|Q9JIX8|ACINU_MOUSE	Q9JIX8	413	0.999	DLEKAPVVLQPEQIVSEEETPPPLLTKEASS	S	E	E	E	5	2	3	0.851	-0.243144	NA	NA	NA	0.334711	0.259056	1.05094	STYX	0.303928	0.897905	0.548237	0.103505	CENTER
ACINU_417	sp|Q9JIX8|ACINU_MOUSE	Q9JIX8	417	0.999	APVVLQPEQIVSEEETPPPLLTKEASSPPTH	T	P	P	P	5	2	3	-0.169168	0.148281	NA	NA	NA	0.359936	0.0762746	0.599755	STYX	-0.0104436	0.708804	0.345322	0.230103	CENTER
ACINU_427 428	sp|Q9JIX8|ACINU_MOUSE	Q9JIX8	427 428	0.88	VSEEETPPPLLTKEASSPPTHIQLQEEMEPV SEEETPPPLLTKEASSPPTHIQLQEEMEPVE	S	S	P	P	7	4	3	-0.0490674	0.110204	NA	0.147956	0.363798	0.259131	0.07711	0.3995	STYX	0.143223	0.304637	0.245247	0.352438	CENTER
ACINU_431	sp|Q9JIX8|ACINU_MOUSE	Q9JIX8	431	0.957	ETPPPLLTKEASSPPTHIQLQEEMEPVEGPA	T	H	I	Q	5	2	3	0.0450152	-0.230561	NA	NA	NA	0.0196985	-0.0117834	0.159141	STYX	-0.0927729	0.34441	0.0556854	0.801269	CENTER
ACINU_454	sp|Q9JIX8|ACINU_MOUSE	Q9JIX8	454	0.999	MEPVEGPAPPVLIQLSPPNTDAGAREPLASP	S	P	P	N	5	2	3	0.0991246	0.0481472	NA	NA	NA	0.159593	0.0739119	0.0902339	STYX	0.0736359	0.656064	0.107913	0.64071	CENTER
ACINU_479	sp|Q9JIX8|ACINU_MOUSE	Q9JIX8	479	0.998	EPLASPHPAQLLRSLSPLSGTTDTKAESPAG	S	P	L	S	8	5	3	0.479934	-0.169459	-0.185876	-0.125634	-0.0326026	0.398966	0.415149	0.394	STYX	-0.00672755	0.220072	0.402705	0.147957	CENTER
ACINU_491	sp|Q9JIX8|ACINU_MOUSE	Q9JIX8	491	1	RSLSPLSGTTDTKAESPAGRVSDESVLPLAQ	S	P	A	G	8	5	3	0.119252	0.0389658	-0.154821	-0.149887	-0.112962	1.25871	0.708476	-0.804662	STYX	-0.0518902	0.205735	0.387508	0.400523	CENTER
ACINU_497	sp|Q9JIX8|ACINU_MOUSE	Q9JIX8	497	0.989	SGTTDTKAESPAGRVSDESVLPLAQKSSLPE	S	D	E	S	7	5	2	0.574352	0.230905	-0.20103	0.201708	0.578757	0.106298	NA	0.867368	STYX	0.276938	0.0874815	0.486833	0.240748	CENTER
ACINU_657	sp|Q9JIX8|ACINU_MOUSE	Q9JIX8	657	0.997	RSRSRSASSSSRKSLSPGVSRDSNTSYTETK	S	P	G	V	8	5	3	0.655604	-0.301553	-0.246837	-0.214012	-0.0179943	0.742835	0.492173	0.513778	STYX	-0.0249585	0.147454	0.582929	0.0602179	CENTER
ACINU_666 667 668 669	sp|Q9JIX8|ACINU_MOUSE	Q9JIX8	666 667 668 669	0.862	SSRKSLSPGVSRDSNTSYTETKDPSCGQEAA SRKSLSPGVSRDSNTSYTETKDPSCGQEAAA RKSLSPGVSRDSNTSYTETKDPSCGQEAAAP KSLSPGVSRDSNTSYTETKDPSCGQEAAAPS	T	S	Y	T	4	2	2	0.98239	0.289236	NA	NA	NA	NA	0.400568	0.339388	STYX	0.635813	0.0395495	0.369978	0.26895	CENTER
ACINU_710	sp|Q9JIX8|ACINU_MOUSE	Q9JIX8	710	1	EKAPTFSASVRGRHLSHPEPEQQHVIQRLQP	S	H	P	E	8	5	3	-0.432267	0.00807596	-0.21659	-0.0336477	0.23085	-0.0981372	-0.148356	-0.147173	STYX	-0.0887157	0.230892	-0.131222	0.625953	CENTER
ACINU_729	sp|Q9JIX8|ACINU_MOUSE	Q9JIX8	729	1	PEQQHVIQRLQPEQGSPKKCEAEEAEPPAAT	S	P	K	K	8	5	3	0.419554	0.0942512	0.0493592	-0.0978629	-0.120972	0.279308	0.290957	0.322789	STYX	0.0688658	0.998884	0.297684	0.257957	CENTER
ACINU_838	sp|Q9JIX8|ACINU_MOUSE	Q9JIX8	838	0.997	KISVVSATKGVQAGNSDTEGGQPGRKRRWGA	S	D	T	E	8	5	3	-0.472896	-0.385099	-0.112224	-0.0433782	0.186835	-0.0142516	0.122354	-0.0382702	STYX	-0.165352	0.0740339	0.0232775	0.90141	CENTER
ACL6A_233	sp|Q9Z2N8|ACL6A_MOUSE	Q9Z2N8	233	1	IPPYMIASKEAVREGSPANWKRKEKLPQVTR	S	P	A	N	8	5	3	0.320099	-0.129539	-0.177065	-0.135573	0.00115208	0.850659	0.897688	0.643435	STYX	-0.0241852	0.257812	0.797261	0.0219008	CENTER
ACL7A_23	sp|Q9QY84|ACL7A_MOUSE	Q9QY84	23	0.998	APQTANIGDGPAKKASDQASMQTQVLQTASL	S	D	Q	A	4	2	2	-0.172224	0.17453	NA	NA	NA	0.567147	NA	0.629393	STYX	0.00115255	0.769105	0.59827	0.114843	CENTER
ACL7B_8	sp|Q9QY83|ACL7B_MOUSE	Q9QY83	8	0.997	________MATKNSPSPKPMGTAQGDPGEAG	S	P	K	P	8	5	3	-0.639371	0.09779	-0.10577	-0.130347	0.0353953	0.749789	0.797173	0.583129	STYX	-0.148461	0.137014	0.71003	0.0316436	CENTER
ACLY_455	sp|Q91V92|ACLY_MOUSE	Q91V92	455	0.996	NASGSTSTPAPSRTASFSESRADEVAPAKKA	S	F	S	E	8	5	3	-0.272159	0.32631	0.298515	0.310277	0.211832	-1.13891	-0.97036	-2.32302	STYX	0.174955	0.134004	-1.47743	0.00491618	NR
ACLY_653	sp|Q91V92|ACLY_MOUSE	Q91V92	653	0.998	ASKLYRPGSVAYVSRSGGMSNELNNIISRTT	S	G	G	M	5	3	2	NA	NA	-0.154822	0.271526	-0.0367748	0.101239	NA	-0.0438074	STYX	0.0266428	0.743681	0.028716	0.904518	CENTER
ACO10_244 245 246 247	sp|Q32MW3|ACO10_MOUSE,sp|Q9R0X4|ACOT9_MOUSE	Q32MW3	244 245 246 247	0.885	LFTQGELNKSRRIAFSTSSLLKVAPSSEERN FTQGELNKSRRIAFSTSSLLKVAPSSEERNI TQGELNKSRRIAFSTSSLLKVAPSSEERNII QGELNKSRRIAFSTSSLLKVAPSSEERNIIH	S	T	S	S	6	3	3	0.448818	-0.558664	NA	0.0682681	NA	0.50436	0.213297	0.116431	STYX	-0.0138592	0.96763	0.278029	0.305078	CENTER
ACON_559	sp|Q99KI0|ACON_MOUSE	Q99KI0	559	0.996	YQHPPKDSSGQRVDVSPTSQRLQLLEPFDKW	S	P	T	S	7	5	2	-0.0500365	0.462679	-0.0481487	-0.161097	-0.377183	0.456214	NA	0.375938	STYX	-0.0347572	0.236216	0.416076	0.225978	CENTER
ACOT1_416	sp|O55137|ACOT1_MOUSE	O55137	416	0.999	QTFFHKQLGSECLHVSPKI____________	S	P	K	I	8	5	3	0.293871	0.301819	-0.0328089	0.349283	-0.33695	-0.895535	-0.903078	-1.09612	STYX	0.115043	0.429996	-0.964909	0.00859328	NR
ACOT1_56	sp|O55137|ACOT1_MOUSE,sp|Q32Q92|ACOT6_MOUSE,sp|Q6Q2Z6|ACOT5_MOUSE,sp|Q8BWN8|ACOT4_MOUSE,sp|Q9QYR7|ACOT3_MOUSE	O55137	56	1	EKGALFRAHARYRADSHGELDLARTPALGGS	S	H	G	E	8	5	3	-0.0852826	-0.550132	0.0738135	-0.0527959	-0.359798	-0.436038	-0.646511	-0.599168	STYX	-0.194839	0.0429619	-0.560573	0.0562778	CENTER
ACOT8_316	sp|P58137|ACOT8_MOUSE	P58137	316	0.952	VTCAQEGVIRLKPQVSESKL___________	S	E	S	K	7	4	3	0.591453	-0.281834	NA	-0.0415033	-0.140733	0.633386	0.477026	0.617835	STYX	0.0318459	0.393869	0.576082	0.0599446	CENTER
ACOX1_26	sp|Q9R0H0|ACOX1_MOUSE	Q9R0H0	26	0.998	AATFNPELITHILDGSPENTRRRREIENLIL	S	P	E	N	5	2	3	0.292509	0.490963	NA	NA	NA	-0.0689065	-0.230297	0.0807303	STYX	0.391736	0.050805	-0.0728243	0.801476	CENTER
ACPM_69	sp|Q9CR21|ACPM_MOUSE	Q9CR21	69	0.999	LAQVPGTVTHLCRQYSDAPPLTLDGIKDRVL	S	D	A	P	4	2	2	NA	NA	0.0769667	NA	-0.281741	-0.348768	0.0661011	NA	STYX	-0.102387	0.402366	-0.141333	0.68254	CENTER
ACSA_263	sp|Q9QXG4|ACSA_MOUSE	Q9QXG4	263	0.992	IVVKHLGRAELGMNDSPSQSPPVKRPCPDVQ	S	P	S	Q	6	3	3	0.0267406	NA	0.0817834	NA	-0.345209	0.254637	0.727147	0.651919	STYX	-0.0788949	0.469993	0.544568	0.0814364	CENTER
ACSA_265	sp|Q9QXG4|ACSA_MOUSE	Q9QXG4	265	0.989	VKHLGRAELGMNDSPSQSPPVKRPCPDVQIC	S	Q	S	P	7	4	3	-0.609456	0.229319	0.0161248	NA	0.481036	0.171806	0.554052	0.478329	STYQ	0.029256	0.696421	0.401396	0.161637	CENTER
ACSA_267	sp|Q9QXG4|ACSA_MOUSE	Q9QXG4	267	0.998	HLGRAELGMNDSPSQSPPVKRPCPDVQICWN	S	P	P	V	8	5	3	0.606182	0.368877	0.0626149	0.0726243	-0.224246	0.244454	0.468811	0.22183	STYX	0.17721	0.351919	0.311698	0.246819	CENTER
ACSA_30	sp|Q9QXG4|ACSA_MOUSE	Q9QXG4	30	1	RAREETGAEGRVRGWSPPPEVRRSAHVPSLQ	S	P	P	P	8	5	3	0.220293	-0.276889	-0.141109	0.0259041	0.0436328	0.521464	0.0134809	0.234888	STYX	-0.0256336	0.478749	0.256611	0.357166	CENTER
ACSL1_672	sp|P41216|ACSL1_MOUSE,sp|Q8JZR0|ACSL5_MOUSE,sp|Q91WC3|ACSL6_MOUSE,sp|Q9JHW4|SELB_MOUSE	P41216	672	0.994	IAVHPELFSIDNGLLTPTLKAKRPELRNYFR	T	P	T	L	7	4	3	0.675593	-0.682504	NA	-0.017619	-0.140642	1.29848	0.626889	1.36302	STYX	-0.0412928	0.407038	1.09613	0.0108592	NR
ACTB_323	sp|P60710|ACTB_MOUSE,sp|P62737|ACTA_MOUSE,sp|P63260|ACTG_MOUSE,sp|P63268|ACTH_MOUSE,sp|P68033|ACTC_MOUSE,sp|P68134|ACTS_MOUSE	P60710	323	0.991	GIADRMQKEITALAPSTMKIKIIAPPERKYS	S	T	M	K	8	5	3	0.517513	-0.33866	-0.0240845	-0.0317193	-1.13042	-0.088972	-0.325708	0.00952405	STYX	-0.201474	0.22498	-0.135052	0.623397	CENTER
ACTL9_12	sp|Q8CG27|ACTL9_MOUSE	Q8CG27	12	0.997	____MDVNGHPKFQPSPETDGPLPLTSSTLM	S	P	E	T	8	5	3	0.0970273	-0.285178	0.0279668	0.288879	0.098304	0.859673	0.275169	0.960568	STYX	0.0453997	0.774808	0.69847	0.0458406	CENTER
ACTL9_22 23 24 25	sp|Q8CG27|ACTL9_MOUSE	Q8CG27	22 23 24 25	0.898	PKFQPSPETDGPLPLTSSTLMVSKSLQQDSL KFQPSPETDGPLPLTSSTLMVSKSLQQDSLS FQPSPETDGPLPLTSSTLMVSKSLQQDSLSM QPSPETDGPLPLTSSTLMVSKSLQQDSLSMV	T	S	S	T	6	4	2	NA	-0.190268	-0.254157	0.33963	-0.0810478	0.238586	NA	0.574195	STYX	-0.0464606	0.23335	0.406391	0.251146	CENTER
ACTT3_60	sp|Q8BXF8|ACTT3_MOUSE	Q8BXF8	60	0.999	SRQELCVGDQAQERRSFLSISYPVERGLISS	S	F	L	S	5	3	2	NA	-0.608293	NA	-0.527937	-0.033276	NA	0.0976191	0.023035	STYX	-0.389835	0.0245531	0.0603271	0.823564	CENTER
ADA17_794	sp|Q9Z0F8|ADA17_MOUSE	Q9Z0F8	794	0.995	GFEKDPFPNSSTAAKSFEDLTDHPVTRSEKA	S	F	E	D	6	3	3	0.26117	-0.196323	0.193747	NA	NA	-0.697289	-0.473261	-0.838907	STYX	0.0861979	0.661997	-0.669819	0.0328831	CENTER
ADA1B_464	sp|P97717|ADA1B_MOUSE	P97717	464	0.996	LLSLPEPPGRRGRLDSGPLFTFKLLGEPESP	S	G	P	L	4	2	2	0.590308	-0.505028	NA	NA	NA	-0.854892	-0.530787	NA	STYX	0.0426402	0.939886	-0.692839	0.0761501	CENTER
ADA22_855	sp|Q9R1V6|ADA22_MOUSE	Q9R1V6	855	0.99	NKKKIRGKRFRPRSNSTETLSPAKSPSSSTG	S	T	E	T	4	2	2	NA	-0.303347	NA	-0.249081	NA	NA	0.506414	0.76238	STYX	-0.276214	0.0314673	0.634397	0.104875	CENTER
ADA29_754	sp|Q811Q4|ADA29_MOUSE	Q811Q4	754	0.992	PSPSLPQLRMPSRSASPTSSIKSTN______	S	P	T	S	7	4	3	NA	0.0747725	-0.0937338	-0.13983	-0.0510749	1.56088	1.5084	1.25666	STYX	-0.0524665	0.224392	1.44198	0.0042016	NR
ADAD1_230	sp|Q5SUE7|ADAD1_MOUSE	Q5SUE7	230	0.999	LEPAGPPPIPAEPVVTPEAAYVSKVQYEGRQ	T	P	E	A	6	3	3	NA	-0.307608	0.298824	NA	-0.0806064	0.298777	0.544165	0.896304	STYX	-0.0297968	0.503235	0.579748	0.0719811	CENTER
ADAM2_729	sp|Q60718|ADAM2_MOUSE	Q60718	729	0.999	MKWRMDDFSSEEQFESESESKD_________	S	E	S	E	8	5	3	0.119826	-0.2314	0.264548	0.554223	-0.166075	0.72822	0.805042	1.28893	STYX	0.108225	0.783388	0.940729	0.0148306	NR
ADAM9_825	sp|Q61072|ADAM9_MOUSE	Q61072	825	0.986	AQFPSRPPPPQPKISSQGNLIPARPAPAPPL	S	Q	G	N	5	3	2	0.184024	0.132293	NA	0.1059	NA	-0.548737	NA	-0.522916	STYQ	0.140739	0.218681	-0.535827	0.129385	CENTER
ADAS_52	sp|Q8C0I1|ADAS_MOUSE	Q8C0I1	52	0.999	QEAPSTNECKARRAASAAGASPAATPAAPES	S	A	A	G	8	5	3	-0.474841	0.257887	-0.0509496	0.109015	-0.0565912	-0.0568894	-0.113461	-0.36489	STYX	-0.0430961	0.56429	-0.178414	0.51094	CENTER
ADAS_57	sp|Q8C0I1|ADAS_MOUSE	Q8C0I1	57	0.999	TNECKARRAASAAGASPAATPAAPESGTIPK	S	P	A	A	8	5	3	-0.330275	0.0816771	-0.124827	-0.199305	-0.126115	-0.39924	-0.178055	-0.492111	STYX	-0.139769	0.0312037	-0.356469	0.195819	CENTER
ADAT1_191	sp|Q9JHI2|ADAT1_MOUSE	Q9JHI2	191	1	NLEDSKDKRNCEDPASPVAKKMRLGTPARSL	S	P	V	A	8	5	3	0.550459	0.282477	-0.18561	-0.0501513	0.254625	-0.230816	0.0934787	-0.339368	STYX	0.17036	0.380532	-0.158902	0.560412	CENTER
ADCY2_1084	sp|Q80TL1|ADCY2_MOUSE	Q80TL1	1084	0.974	DLKTYFVNTEMSRSLSQSNLAS_________	S	Q	S	N	7	4	3	0.24282	NA	0.0833429	0.0729194	-0.0405416	0.046073	-0.234529	0.132757	STYQ	0.0896352	0.52381	-0.0185663	0.972321	CENTER
ADCY2_471	sp|Q80TL1|ADCY2_MOUSE	Q80TL1	471	1	LVKTYFVINPKGERRSPQHLFRPRHTLDGAK	S	P	Q	H	5	2	3	0.417722	NA	0.0819043	NA	NA	0.369075	0.327537	0.376121	STYX	0.249813	0.197433	0.357578	0.187675	CENTER
ADCY5_156	sp|P84309|ADCY5_MOUSE	P84309	156	1	AAAAAAAGGTEVRPRSVELGLEERRGKGRAA	S	V	E	L	8	5	3	0.239214	-0.278664	0.255298	0.0178602	-0.228067	-0.408174	-0.457679	-0.0737925	STYX	0.00112835	0.721223	-0.313215	0.256777	CENTER
ADCY5_62	sp|P84309|ADCY5_MOUSE	P84309	62	0.998	GGSTRGSTKRSGGAVTPQQQQRLASRWRGGD	T	P	Q	Q	5	3	2	-0.266028	0.600619	NA	NA	0.0171627	-0.626967	-0.681349	NA	STYX	0.117251	0.983519	-0.654158	0.0812738	CENTER
ADCY6_53	sp|Q01341|ADCY6_MOUSE	Q01341	53	0.997	CAPRYMSCLKNAEPPSPTPAAHTRCPWQDEA	S	P	T	P	7	4	3	NA	0.0817881	0.251229	0.213483	0.14799	-0.134519	-0.28753	-0.407398	STYX	0.173623	0.0969086	-0.276482	0.304259	CENTER
ADCY9_1311	sp|P51830|ADCY9_MOUSE	P51830	1311	1	DDSTQAKEARLSSKRSWREPVKAEERFPFGK	S	W	R	E	4	2	2	1.12621	-0.141104	NA	NA	NA	1.19865	NA	-0.235109	STYX	0.492555	0.724709	0.481771	0.44915	CENTER
ADCY9_613	sp|P51830|ADCY9_MOUSE	P51830	613	0.996	RESSGPRGQGTASPGSVSDLAQTVKTFDNLK	S	V	S	D	8	5	3	-0.0382546	-0.199742	0.267027	0.219945	-0.151807	-0.911651	-1.4383	-1.54574	STYX	0.0194338	0.684502	-1.29856	0.00485521	NR
ADDA_11 12	sp|Q9QYC0|ADDA_MOUSE	Q9QYC0	11 12	0.891	_____MNGDTRAAVVTSPPPTTAPHKERYFD ____MNGDTRAAVVTSPPPTTAPHKERYFDR	T	S	P	P	8	5	3	0.167114	0.10357	-0.188857	0.00357404	0.111204	0.0565984	-0.999194	-0.56067	STYX	0.0393212	0.872103	-0.501089	0.148858	CENTER
ADDA_12	sp|Q9QYC0|ADDA_MOUSE	Q9QYC0	12	0.994	____MNGDTRAAVVTSPPPTTAPHKERYFDR	S	P	P	P	7	5	2	-0.220712	0.183164	-0.0492538	-0.0623024	0.270018	-0.558527	NA	-0.506003	STYX	0.0241828	0.763095	-0.532265	0.1313	CENTER
ADDA_353	sp|Q9QYC0|ADDA_MOUSE	Q9QYC0	353	0.921	PDNLVLLDPGKYKAKSRSPGTPAGEGSGSPP	S	R	S	P	6	3	3	-0.605849	0.43795	0.12928	NA	NA	-0.523947	-0.207555	0.131554	STYX	-0.0128732	0.803544	-0.199983	0.491794	CENTER
ADDA_355	sp|Q9QYC0|ADDA_MOUSE	Q9QYC0	355	0.989	NLVLLDPGKYKAKSRSPGTPAGEGSGSPPKW	S	P	G	T	6	3	3	-0.410161	0.246371	-0.126173	NA	NA	-0.479857	-0.576583	-0.143168	STYX	-0.0966545	0.347544	-0.399869	0.160798	CENTER
ADDA_358	sp|Q9QYC0|ADDA_MOUSE	Q9QYC0	358	0.998	LLDPGKYKAKSRSPGTPAGEGSGSPPKWQIG	T	P	A	G	6	3	3	-0.11957	0.290012	0.0666618	NA	NA	-0.690274	-0.401602	-0.32854	STYX	0.0790344	0.799823	-0.473472	0.100812	CENTER
ADDA_427	sp|Q9QYC0|ADDA_MOUSE	Q9QYC0	427	0.994	VPASVTGHSFASDGDSGTCSPLRHSFQKQQR	S	G	T	C	4	2	2	0.171685	-0.245384	NA	NA	NA	NA	-0.154701	-0.755662	STYX	-0.0368494	0.668774	-0.455181	0.23219	CENTER
ADDA_431	sp|Q9QYC0|ADDA_MOUSE	Q9QYC0	431	0.996	VTGHSFASDGDSGTCSPLRHSFQKQQREKTR	S	P	L	R	5	2	3	0.142589	-0.539464	NA	NA	NA	-0.56625	-0.0827022	-0.200872	STYX	-0.198437	0.498979	-0.283275	0.31799	CENTER
ADDA_464 465	sp|Q9QYC0|ADDA_MOUSE	Q9QYC0	464 465	0.898	HSGRGDDASEEGQNGSSPKSKTKWTKEDGHR SGRGDDASEEGQNGSSPKSKTKWTKEDGHRT	S	S	P	K	8	5	3	-0.610332	0.343313	0.088403	-0.0287808	0.185882	-1.18421	-0.940828	-0.420018	STYX	-0.00430307	0.818203	-0.848353	0.0203465	NR
ADDA_465	sp|Q9QYC0|ADDA_MOUSE	Q9QYC0	465	0.993	SGRGDDASEEGQNGSSPKSKTKWTKEDGHRT	S	P	K	S	8	5	3	-0.602122	0.583472	0.00913798	0.121966	0.153932	-0.609653	-1.19984	-0.419214	STYX	0.0532771	0.618498	-0.742902	0.0328831	CENTER
ADDA_480 481 482 483	sp|Q9QYC0|ADDA_MOUSE	Q9QYC0	480 481 482 483	0.871	SPKSKTKWTKEDGHRTSTSAVPNLFVPLNTN PKSKTKWTKEDGHRTSTSAVPNLFVPLNTNP KSKTKWTKEDGHRTSTSAVPNLFVPLNTNPK SKTKWTKEDGHRTSTSAVPNLFVPLNTNPKE	T	S	T	S	6	3	3	0.133364	-0.268964	0.237065	NA	NA	-0.32128	-1.01588	-0.146807	STYX	0.0338216	0.873633	-0.494654	0.137254	CENTER
ADDA_610	sp|Q9QYC0|ADDA_MOUSE	Q9QYC0	610	0.999	EQKEKSPPDQSAVPNTPPSTPVKLEEDLPQE	T	P	P	S	7	4	3	-0.544289	0.135822	0.348448	0.13613	NA	-0.361748	-0.579074	-0.267502	STYX	0.0190276	0.600433	-0.402774	0.148858	CENTER
ADDG_42	sp|Q9QYB5|ADDG_MOUSE	Q9QYB5	42	1	RINESDPEYLRERNMSPDLRQDFNMMEQRKR	S	P	D	L	7	5	2	1.01015	-0.315892	0.0422547	0.278765	-0.216119	0.38851	NA	-0.431432	STYX	0.159832	0.997067	-0.0214608	0.946403	CENTER
ADDG_460 461	sp|Q9QYB5|ADDG_MOUSE	Q9QYB5	460 461	0.899	TYMKVNVPEESRNGETSPRTKITWMKAEDSS YMKVNVPEESRNGETSPRTKITWMKAEDSSK	T	S	P	R	5	3	2	NA	NA	-0.329856	-0.0722956	0.388442	0.925401	NA	0.560163	STYX	-0.00457005	0.569542	0.742782	0.0770491	CENTER
ADDG_677	sp|Q9QYB5|ADDG_MOUSE	Q9QYB5	677	0.998	IKSPERTEEVLSPDGSPSKSPSKKKKKFRTP	S	P	S	K	6	3	3	-0.0378806	0.26755	NA	NA	-0.135079	-1.03838	-0.718464	-0.56166	STYX	0.0315301	0.7737	-0.772833	0.0211261	CENTER
ADDG_679	sp|Q9QYB5|ADDG_MOUSE	Q9QYB5	679	0.981	SPERTEEVLSPDGSPSKSPSKKKKKFRTPSF	S	K	S	P	6	3	3	-0.329778	0.0705689	0.0336008	NA	NA	-0.915041	-1.04617	-0.835495	STYX	-0.0752029	0.467942	-0.932235	0.00958683	NR
ADDG_681	sp|Q9QYB5|ADDG_MOUSE	Q9QYB5	681	0.997	ERTEEVLSPDGSPSKSPSKKKKKFRTPSFLK	S	P	S	K	8	5	3	-0.279409	0.0697216	0.121548	-0.042349	-0.567962	-1.01641	-1.07601	-0.806632	STYX	-0.13969	0.19823	-0.966352	0.00869173	NR
ADDG_691	sp|Q9QYB5|ADDG_MOUSE,sp|Q9QYB8|ADDB_MOUSE,sp|Q9QYC0|ADDA_MOUSE	Q9QYB5	691	0.99	GSPSKSPSKKKKKFRTPSFLKKNKKKEKVEA	T	P	S	F	7	4	3	NA	-0.375087	0.288343	0.484132	-0.130051	-1.34884	-1.99354	-1.98151	STYX	0.0668344	0.996813	-1.77463	0.00306884	NR
ADDG_693	sp|Q9QYB5|ADDG_MOUSE,sp|Q9QYB8|ADDB_MOUSE,sp|Q9QYC0|ADDA_MOUSE	Q9QYB5	693	0.996	PSKSPSKKKKKFRTPSFLKKNKKKEKVEA__	S	F	L	K	8	5	3	-0.05217	-0.522427	0.244683	0.553705	-0.374308	-1.62238	-1.75195	-1.83678	STYX	-0.0301032	0.568777	-1.73704	0.00293823	NR
ADGB_1193	sp|G3UZ78|ADGB_MOUSE	G3UZ78	1193	0.998	ALSSQSSKQVLLSHPSPKKDPEVLTKKKSGQ	S	P	K	K	7	5	2	0.717988	-0.148907	-0.0735492	0.0260022	-0.191054	0.950039	NA	1.00035	STYX	0.0660959	0.42217	0.975195	0.0373869	NR
ADGB_1297	sp|G3UZ78|ADGB_MOUSE	G3UZ78	1297	0.998	KMDIKEKHEEPAPMGSPDSHAVSEGQKSVGV	S	P	D	S	8	5	3	-0.668711	0.370836	0.119464	-0.114763	0.0790973	0.738196	1.08391	0.176729	STYX	-0.0428155	0.85468	0.66628	0.0615996	CENTER
ADGB_1431	sp|G3UZ78|ADGB_MOUSE	G3UZ78	1431	0.998	FIKKPVTTDTTTSAPSPETLSVSQSQTKSSE	S	P	E	T	6	4	2	-0.636564	-0.110593	0.638706	NA	-0.256669	NA	0.540523	0.453909	STYX	-0.0912799	0.186619	0.497216	0.167299	CENTER
ADGB_1509	sp|G3UZ78|ADGB_MOUSE	G3UZ78	1509	0.986	KEEPPQKEIPVVRQRSPTILETSPQQIRKAL	S	P	T	I	8	5	3	-0.0664832	0.140353	-0.107015	-0.225608	-0.0484323	0.105626	-0.242887	-0.349895	STYX	-0.0614371	0.163316	-0.162386	0.554036	CENTER
ADGB_1509 1515 1516	sp|G3UZ78|ADGB_MOUSE	G3UZ78	1509 1515 1516	0.896	KEEPPQKEIPVVRQRSPTILETSPQQIRKAL KEIPVVRQRSPTILETSPQQIRKALEFLDFS EIPVVRQRSPTILETSPQQIRKALEFLDFSH	S	P	T	I	8	5	3	-0.679003	-0.0868209	0.00216834	0.0211088	0.190823	0.165006	0.187384	-0.186526	STYX	-0.110345	0.381658	0.0552881	0.801166	CENTER
ADGB_1515 1516	sp|G3UZ78|ADGB_MOUSE	G3UZ78	1515 1516	0.899	KEIPVVRQRSPTILETSPQQIRKALEFLDFS EIPVVRQRSPTILETSPQQIRKALEFLDFSH	T	S	P	Q	7	5	2	0.104093	-0.0741615	-0.24686	-0.0764821	-0.0238865	0.154239	NA	-0.534724	STYX	-0.0634593	0.175001	-0.190242	0.623395	CENTER
ADGB_1516	sp|G3UZ78|ADGB_MOUSE	G3UZ78	1516	0.996	EIPVVRQRSPTILETSPQQIRKALEFLDFSH	S	P	Q	Q	8	5	3	0.172918	0.0311391	-0.277519	-0.15419	0.0342457	0.0371416	1.25716	-0.168201	STYX	-0.0386812	0.409001	0.375367	0.437528	CENTER
ADIG_63	sp|Q8R400|ADIG_MOUSE	Q8R400	63	0.998	DSDLCFNWEPWSKRPSECGCEETFPGEEDGL	S	E	C	G	5	2	3	0.230741	NA	NA	NA	-0.0921661	0.12665	-0.53697	0.482247	STYX	0.0692874	0.910228	0.0239755	0.907235	CENTER
ADIP_168	sp|Q8VC66|ADIP_MOUSE	Q8VC66	168	1	IGLQERDRQLQCKNRSLHQLLKNEKDEVQKL	S	L	H	Q	5	3	2	0.630057	-0.134653	-0.168979	NA	NA	NA	0.800288	1.32527	STYX	0.108809	0.623302	1.06278	0.0360018	NR
ADIP_29	sp|Q8VC66|ADIP_MOUSE	Q8VC66	29	0.996	TENKNLSQYTSETKMSPSSLYSQQVLCSSVP	S	P	S	S	6	3	3	0.497489	0.0883484	0.071405	NA	NA	0.469442	0.565858	1.13313	STYX	0.219081	0.194023	0.72281	0.0391975	CENTER
ADIP_293	sp|Q8VC66|ADIP_MOUSE	Q8VC66	293	0.999	KKVLQQMKKEMISLLSPQKKKPRERAEDGTG	S	P	Q	K	8	5	3	1.2792	-0.0463206	-0.162492	0.0880249	-0.839028	0.690918	0.388589	0.868654	STYX	0.0638777	0.508686	0.649387	0.0477023	CENTER
ADIP_313	sp|Q8VC66|ADIP_MOUSE	Q8VC66	313	0.999	KPRERAEDGTGTVAISDIEDDSGELSRDSVW	S	D	I	E	8	5	3	0.157638	-0.121713	0.238482	0.511469	-0.0979284	0.0545359	-0.220534	0.279107	STYX	0.13759	0.534591	0.0377029	0.871948	CENTER
ADIP_342	sp|Q8VC66|ADIP_MOUSE	Q8VC66	342	0.995	VWGLSCDTVREQLTNSIRKQWRILKSHVEKL	S	I	R	K	5	3	2	1.14498	-0.0944124	-0.307338	NA	NA	-0.307405	NA	-0.073754	STYX	0.247742	0.635171	-0.190579	0.563484	CENTER
ADIP_537	sp|Q8VC66|ADIP_MOUSE	Q8VC66	537	0.994	SVANGVPACTSKLTKSLPASPSTSDFRQTHS	S	L	P	A	8	5	3	0.107723	-0.194661	0.045859	-0.0727538	-0.142362	0.0611781	0.170023	0.706777	STYX	-0.0512389	0.226488	0.312659	0.292947	CENTER
ADIP_541	sp|Q8VC66|ADIP_MOUSE	Q8VC66	541	0.998	GVPACTSKLTKSLPASPSTSDFRQTHSCVSE	S	P	S	T	8	5	3	0.314696	-0.0120594	-0.125336	-0.093952	-0.219162	0.565892	0.93148	0.73455	STYX	-0.0271628	0.258903	0.743974	0.0287335	CENTER
ADIP_543	sp|Q8VC66|ADIP_MOUSE	Q8VC66	543	0.99	PACTSKLTKSLPASPSTSDFRQTHSCVSEHS	S	T	S	D	8	5	3	0.234098	-0.210462	-0.197811	-0.0398886	-0.252692	-0.110477	0.35486	0.173711	STYX	-0.0933512	0.0946126	0.139365	0.587553	CENTER
ADIP_588 591 592	sp|Q8VC66|ADIP_MOUSE	Q8VC66	588 591 592	0.882	SEVARESTDQKWSVQSRPSSREGCYSGCSSA ARESTDQKWSVQSRPSSREGCYSGCSSAFRS RESTDQKWSVQSRPSSREGCYSGCSSAFRSA	S	R	P	S	5	2	3	-1.06222	0.13465	NA	NA	NA	0.347781	0.466555	0.250158	STYX	-0.463783	0.465906	0.354831	0.19462	CENTER
ADIP_591 592	sp|Q8VC66|ADIP_MOUSE	Q8VC66	591 592	0.876	ARESTDQKWSVQSRPSSREGCYSGCSSAFRS RESTDQKWSVQSRPSSREGCYSGCSSAFRSA	S	S	R	E	7	5	2	-0.462545	-0.143414	-0.0232418	-0.207	-0.00015226	0.429343	NA	0.471469	STYX	-0.167271	0.0274975	0.450406	0.196978	CENTER
ADIP_592	sp|Q8VC66|ADIP_MOUSE	Q8VC66	592	0.997	RESTDQKWSVQSRPSSREGCYSGCSSAFRSA	S	R	E	G	5	2	3	-0.0473255	0.0631242	NA	NA	NA	0.397173	0.629043	0.736803	STYX	0.00789931	0.799561	0.587673	0.0597993	CENTER
ADNP_708	sp|Q9Z103|ADNP_MOUSE	Q9Z103	708	1	QNGQDKTNAPSRLNQSPGLAPVKRTYEQMEF	S	P	G	L	7	5	2	0.491271	-0.205709	-0.195457	-0.162669	-0.451705	NA	-0.270514	0.129063	STYX	-0.104854	0.0608282	-0.0707253	0.847732	CENTER
ADNP_904	sp|Q9Z103|ADNP_MOUSE	Q9Z103	904	1	GSPFDPVFEVEPKIPSDNLEEPVPKVIPEGA	S	D	N	L	8	5	3	1.36457	-0.24129	-0.171519	-0.16009	-0.15974	0.357036	0.393752	0.302386	STYX	0.126387	0.108593	0.351058	0.195081	CENTER
ADNP_98	sp|Q9Z103|ADNP_MOUSE	Q9Z103	98	1	SKFFSAYKSHFRNVHSEDFENRILLNCPYCT	S	E	D	F	7	5	2	1.39142	0.0500151	-0.0208156	-0.0837387	-0.212666	NA	1.00975	0.368362	STYX	0.224843	0.703698	0.689056	0.107927	CENTER
ADT4_20	sp|Q3V132|ADT4_MOUSE	Q3V132	20	0.992	SSKKQSSKKALFDPVSFSKDLLAGGVAAAVS	S	F	S	K	4	2	2	0.351199	-0.588209	NA	NA	NA	1.20066	1.02671	NA	STYX	-0.118505	0.805894	1.11368	0.0289601	NR
ADX_65	sp|P46656|ADX_MOUSE	P46656	65	0.991	EAGPGRPLSVSARARSSSEDKITVHFKNRDG	S	S	S	E	7	4	3	-0.172488	NA	-0.1076	0.204825	0.162609	-1.10752	-0.887885	-1.50121	STYX	0.0218365	0.805954	-1.16554	0.00588637	NR
ADX_65 66 67	sp|P46656|ADX_MOUSE	P46656	65 66 67	0.897	EAGPGRPLSVSARARSSSEDKITVHFKNRDG AGPGRPLSVSARARSSSEDKITVHFKNRDGE GPGRPLSVSARARSSSEDKITVHFKNRDGET	S	S	S	E	8	5	3	-0.249506	0.231028	-0.169043	0.0581067	-0.103478	-0.578708	-1.02805	-1.13606	STYX	-0.0465784	0.270885	-0.914274	0.0128283	NR
ADX_67	sp|P46656|ADX_MOUSE	P46656	67	0.983	GPGRPLSVSARARSSSEDKITVHFKNRDGET	S	E	D	K	5	2	3	-0.316325	0.335232	NA	NA	NA	-0.548901	-1.3951	-1.4648	STYX	0.0094535	0.857493	-1.13627	0.00985451	NR
AEBP2_199	sp|Q9Z248|AEBP2_MOUSE	Q9Z248	199	0.996	TGGGGSSATSGGRRGSLEMSSDGEPLSRMDS	S	L	E	M	5	3	2	-0.0646174	0.199547	NA	0.205672	NA	NA	-0.72969	-0.926671	STYX	0.113534	0.476676	-0.828181	0.0460199	CENTER
AF10_252	sp|O54826|AF10_MOUSE	O54826	252	0.998	EKDKHKQKHKKQPEPSPALVPSLTVTTEKTY	S	P	A	L	6	3	3	NA	0.161544	0.0387119	-0.0171563	NA	0.641799	0.43124	0.889349	STYX	0.0610332	0.765728	0.654129	0.0453777	CENTER
AF10_346	sp|O54826|AF10_MOUSE	O54826	346	0.994	KPGAGRNPGTAVSASSPFPQGSFSGTPGSVK	S	P	F	P	4	2	2	NA	-0.0454401	0.755015	NA	NA	0.569017	0.01871	NA	STYX	0.354788	0.462408	0.293863	0.422914	CENTER
AF10_370	sp|O54826|AF10_MOUSE	O54826	370	0.999	GTPGSVKSSSGSSVQSPQDFLSFTDSDLRSD	S	P	Q	D	8	5	3	-0.00406517	0.134796	-0.0918019	0.431005	-0.133219	0.363441	0.520497	0.701775	STYX	0.0673429	0.930389	0.528571	0.0813429	CENTER
AF10_436	sp|O54826|AF10_MOUSE	O54826	436	0.999	PVTSTVISQPKSFDNSPGELGSSSLPTAGYK	S	P	G	E	8	5	3	0.578466	-0.052222	-0.108868	-0.143111	0.204188	0.909232	0.775652	0.744086	STYX	0.0956904	0.890816	0.809657	0.0201735	CENTER
AF10_536	sp|O54826|AF10_MOUSE	O54826	536	0.998	TLLRNGSLQSLSVGSSPVGSEISMQYRHDGA	S	P	V	G	5	2	3	0.189341	0.0851791	NA	NA	NA	-0.00500897	-0.0352837	0.558544	STYX	0.13726	0.342825	0.17275	0.56411	CENTER
AF10_691	sp|O54826|AF10_MOUSE	O54826	691	0.998	LGGRGSSPRGSLSPRSPVSNLQLRYDQPSNS	S	P	V	S	8	5	3	0.256645	-0.179665	-0.21092	-0.150219	-0.0968564	0.387945	0.293881	0.67118	STYX	-0.076203	0.0930494	0.451002	0.124514	CENTER
AF1L2_484	sp|Q5DTU0|AF1L2_MOUSE	Q5DTU0	484	0.952	VSAAKTSLLLMQRKFSEPNTYIDGLPSRDCQ	S	E	P	N	5	2	3	0.727233	0.160027	NA	NA	NA	-0.873134	-0.904856	-0.309117	STYX	0.44363	0.0837335	-0.695702	0.0370719	CENTER
AF9_484	sp|A2AM29|AF9_MOUSE	A2AM29	484	0.999	PPLLKTNNNQILEVKSPIKQSKSDKQIKNGE	S	P	I	K	6	3	3	NA	NA	-0.00903387	0.128361	-0.155119	-0.672558	-0.697154	-1.53268	STYX	-0.0119303	0.608347	-0.967465	0.0142224	NR
AFAD_1081 1082 1083	sp|Q9QZQ1|AFAD_MOUSE	Q9QZQ1	1081 1082 1083	0.897	LVGLSQERAAELMTRTSSVVTLEVAKQGAIY VGLSQERAAELMTRTSSVVTLEVAKQGAIYH GLSQERAAELMTRTSSVVTLEVAKQGAIYHG	T	S	S	V	5	3	2	NA	NA	-0.184972	-0.0989359	-0.128105	-0.0659365	NA	-0.044242	STYX	-0.137338	0.0471045	-0.0550893	0.878628	CENTER
AFAD_1083	sp|Q9QZQ1|AFAD_MOUSE	Q9QZQ1	1083	0.994	GLSQERAAELMTRTSSVVTLEVAKQGAIYHG	S	V	V	T	7	4	3	0.65796	-0.0983483	NA	-0.051642	0.140104	-0.0647387	-0.274415	0.100136	STYX	0.162018	0.724098	-0.0796727	0.782312	CENTER
AFAD_1107	sp|Q9QZQ1|AFAD_MOUSE	Q9QZQ1	1107	1	QGAIYHGLATLLNQPSPMMQRISDRRGSGKP	S	P	M	M	7	4	3	0.339013	NA	0.0703233	0.301537	0.242767	0.125964	-0.22436	-0.0855004	STYX	0.23841	0.0445349	-0.0612987	0.837227	CENTER
AFAD_1143	sp|Q9QZQ1|AFAD_MOUSE	Q9QZQ1	1143	0.997	GFELYNNSAQNGSPESPQMPWTEYSEPKKLP	S	P	Q	M	5	2	3	0.110824	-0.0166991	NA	NA	NA	0.0636714	-0.137872	-0.498097	STYX	0.0470622	0.89635	-0.190766	0.50948	CENTER
AFAD_1172 1173	sp|Q9QZQ1|AFAD_MOUSE	Q9QZQ1	1172 1173	0.899	LPGDDRLMKNRADHRSSPNVANQPPSPGGKG PGDDRLMKNRADHRSSPNVANQPPSPGGKGP	S	S	P	N	5	3	2	-0.49882	0.0596006	-0.425368	NA	NA	-0.353748	-0.173058	NA	STYX	-0.288196	0.072959	-0.263403	0.419416	CENTER
AFAD_1182	sp|Q9QZQ1|AFAD_MOUSE	Q9QZQ1	1182	1	RADHRSSPNVANQPPSPGGKGPYTSGTAAKI	S	P	G	G	8	5	3	-0.425051	0.278174	-0.302041	-0.423806	0.270193	0.0317983	0.0917296	-0.0311985	STYX	-0.120506	0.273962	0.0307765	0.87553	CENTER
AFAD_1201 1202	sp|Q9QZQ1|AFAD_MOUSE	Q9QZQ1	1201 1202	0.89	KGPYTSGTAAKITSVSTGNLCTEEQSPPPRP GPYTSGTAAKITSVSTGNLCTEEQSPPPRPE	S	T	G	N	8	5	3	-0.372281	-0.0409912	-0.285611	0.514111	-0.167547	-0.210391	-0.30019	-0.22283	STYX	-0.0704639	0.120158	-0.24447	0.352854	CENTER
AFAD_1202	sp|Q9QZQ1|AFAD_MOUSE	Q9QZQ1	1202	0.985	GPYTSGTAAKITSVSTGNLCTEEQSPPPRPE	T	G	N	L	4	2	2	-0.22666	-0.430267	NA	NA	NA	-0.407897	-0.42097	NA	STYX	-0.328464	0.0283048	-0.414433	0.215788	CENTER
AFAD_1232	sp|Q9QZQ1|AFAD_MOUSE	Q9QZQ1	1232	0.998	EAYPIPTQTYTREYFTFPASKSQDRMAPPQS	T	F	P	A	7	4	3	0.320593	-0.896313	NA	0.139382	0.0917244	-0.357409	-1.49115	-1.49225	STYX	-0.0861533	0.712239	-1.1136	0.0160809	NR
AFAD_1238	sp|Q9QZQ1|AFAD_MOUSE	Q9QZQ1	1238	0.996	TQTYTREYFTFPASKSQDRMAPPQSQWPNYE	S	Q	D	R	6	4	2	0.239855	-0.0380936	0.101035	NA	-0.0788055	NA	-0.666475	-0.945552	STYQ	0.0559978	0.908048	-0.806014	0.0512529	CENTER
AFAD_1275	sp|Q9QZQ1|AFAD_MOUSE	Q9QZQ1	1275	1	TESNHSSIAIQRVTRSQEELREEKVYQLERH	S	Q	E	E	8	5	3	0.304282	-0.206162	0.00637099	-0.0644713	-0.152493	-0.304997	-0.265092	-0.887492	STYQ	-0.0224947	0.305065	-0.48586	0.117493	CENTER
AFAD_1330	sp|Q9QZQ1|AFAD_MOUSE	Q9QZQ1	1330	0.998	STSSQEHLNHSSKSVTPASTLTKSGPGRWKT	T	P	A	S	8	5	3	-0.0411413	-0.82257	-0.0695614	0.306266	-0.250912	-1.0582	-1.31334	-1.6241	STYX	-0.175584	0.143389	-1.33188	0.00423898	NR
AFAD_1719	sp|Q9QZQ1|AFAD_MOUSE	Q9QZQ1	1719	0.997	PPPQRNASYLKTQVLSPDSLFTAKFVAYDEE	S	P	D	S	7	4	3	1.00815	-0.223308	NA	0.0656463	0.0189749	0.472951	0.692472	0.615553	STYX	0.217367	0.837748	0.593659	0.055865	CENTER
AFAD_1770	sp|Q9QZQ1|AFAD_MOUSE	Q9QZQ1	1770	0.999	GAYDAPREAREKLTRSQDADLPGSSGAPENL	S	Q	D	A	8	5	3	0.246363	0.202824	0.083613	0.156236	-0.00576595	-0.463675	-0.478039	-0.811364	STYQ	0.136654	0.174738	-0.584359	0.0528651	CENTER
AFAD_216	sp|Q9QZQ1|AFAD_MOUSE	Q9QZQ1	216	0.997	EVYKDMPETSFTRTISNPEVVMKRRRQQKLE	S	N	P	E	8	5	3	0.0803719	-0.786512	-0.0269979	0.521131	-0.20542	-0.761597	-0.73736	-0.385824	STYX	-0.0834854	0.457538	-0.62826	0.0421919	CENTER
AFAD_246	sp|Q9QZQ1|AFAD_MOUSE	Q9QZQ1	246	0.992	EKRMQEFRSSDGRPDSGGTLRIYADSLKPNI	S	G	G	T	8	5	3	-0.233218	0.67858	0.0649562	0.0448519	0.236927	-0.121142	0.472861	-0.439816	STYX	0.158419	0.463391	-0.0293654	0.891995	CENTER
AFAD_249	sp|Q9QZQ1|AFAD_MOUSE	Q9QZQ1	249	0.994	MQEFRSSDGRPDSGGTLRIYADSLKPNIPYK	T	L	R	I	5	3	2	NA	-0.084419	NA	0.0820921	0.00776342	-0.756228	NA	-0.398747	STYX	0.00181217	0.694393	-0.577487	0.119436	CENTER
AFAD_512	sp|Q9QZQ1|AFAD_MOUSE	Q9QZQ1	512	1	FKFVDPIQDHVLSKRSVDGGLMVKGPRHKPG	S	V	D	G	5	3	2	NA	-0.381129	NA	0.0649111	-0.805125	-0.0551698	NA	-0.441732	STYX	-0.373781	0.0751662	-0.248451	0.463106	CENTER
AFAD_566	sp|Q9QZQ1|AFAD_MOUSE	Q9QZQ1	566	0.969	STTRLDSDRVSSASSTAERGMVKPMIRLDQE	T	A	E	R	5	2	3	-0.9093	0.995539	NA	NA	NA	-0.305901	0.14125	-0.43592	STYX	0.0431195	0.972762	-0.20019	0.47436	CENTER
AFAP1_549	sp|Q80YS6|AFAP1_MOUSE	Q80YS6	549	0.998	QQKKVETAGGVKRTASNAEQYKYGKNRVEAD	S	N	A	E	8	5	3	-0.0474851	-0.479566	-0.235216	-0.225192	0.25749	-0.432183	-0.570448	-0.153526	STYX	-0.145994	0.0719471	-0.385386	0.171721	CENTER
AFAP1_669	sp|Q80YS6|AFAP1_MOUSE	Q80YS6	669	0.999	LGLAIEPRSGTSSPQSPVFRHRTLENSPISS	S	P	V	F	8	5	3	0.0624159	0.22401	-0.278905	-0.120257	0.142057	-0.42808	-0.0192335	-0.195348	STYX	0.00586435	0.799585	-0.214221	0.432808	CENTER
AFAP1_708 709	sp|Q80YS6|AFAP1_MOUSE	Q80YS6	708 709	0.887	PLPVNSAAVLKKSQPSSGSSPCRGHVLQKAK LPVNSAAVLKKSQPSSGSSPCRGHVLQKAKE	S	S	G	S	6	3	3	-1.40287	1.19399	NA	-0.170462	NA	1.28598	0.660152	0.643505	STYX	-0.126449	0.441881	0.863213	0.0217087	NR
AFAP1_712	sp|Q80YS6|AFAP1_MOUSE	Q80YS6	712	0.998	NSAAVLKKSQPSSGSSPCRGHVLQKAKEWEL	S	P	C	R	7	5	2	-0.763951	0.0385718	-0.0308813	-0.687402	1.06744	0.846941	1.6361	NA	STYX	-0.0752443	0.333225	1.24152	0.0301352	NR
AFF4_1055	sp|Q9ESC8|AFF4_MOUSE	Q9ESC8	1055	0.999	SPGLGSKAVGMPSPVSPKLSPGNSGSYSSGG	S	P	K	L	8	5	3	0.57119	-0.450317	-0.231742	0.0939353	-0.141574	0.0438165	-0.199849	0.273751	STYX	-0.0317014	0.30663	0.0392396	0.868369	CENTER
AFF4_669	sp|Q9ESC8|AFF4_MOUSE	Q9ESC8	669	0.995	LPPSSQTPKYPESNRTPVKPSSVEEEDSFFR	T	P	V	K	5	2	3	NA	-0.132655	0.0401403	NA	NA	-0.181848	-0.833148	-0.307539	STYX	-0.0462573	0.452888	-0.440845	0.150104	CENTER
AFF4_689	sp|Q9ESC8|AFF4_MOUSE	Q9ESC8	689	1	SSVEEEDSFFRQRMFSPMEEKELLSPLSEPD	S	P	M	E	5	2	3	1.73783	-0.595759	NA	NA	NA	-0.373323	-0.255172	-0.249689	STYX	0.571035	0.991572	-0.292728	0.270192	CENTER
AFF4_698	sp|Q9ESC8|AFF4_MOUSE	Q9ESC8	698	0.995	FRQRMFSPMEEKELLSPLSEPDDRYPLIVKI	S	P	L	S	4	2	2	0.411218	-0.548483	NA	NA	NA	-0.283708	NA	-0.474142	STYX	-0.0686326	0.857879	-0.378925	0.258249	CENTER
AFF4_701	sp|Q9ESC8|AFF4_MOUSE	Q9ESC8	701	0.999	RMFSPMEEKELLSPLSEPDDRYPLIVKIDLN	S	E	P	D	5	2	3	0.496724	-0.447678	NA	NA	NA	-0.0863513	-0.767241	-0.450495	STYX	0.0245227	0.918022	-0.434696	0.151969	CENTER
AFF4_809	sp|Q9ESC8|AFF4_MOUSE	Q9ESC8	809	0.999	ESSKQSSTKEKDLLPSPAGPILSKDSKTEHG	S	P	A	G	7	4	3	0.526047	-0.345526	-0.11438	-0.163286	NA	-0.174472	-0.344949	-0.389268	STYX	-0.0242861	0.232443	-0.302896	0.258632	CENTER
AFF4_831	sp|Q9ESC8|AFF4_MOUSE	Q9ESC8	831	0.995	SKDSKTEHGSRKRTVSQSSSLKSSGTSSKEN	S	Q	S	S	7	5	2	-0.459579	-0.0443156	0.0173896	0.803955	-0.0103872	-1.02065	NA	-0.995763	STYQ	0.0614126	0.645833	-1.00821	0.0284703	NR
AFG2H_18	sp|Q3UMC0|AFG2H_MOUSE	Q3UMC0	18	0.997	SKKNRKRQKEGAEGASPSLSAAPSRSGTSTP	S	P	S	L	8	5	3	-0.331393	0.0279722	0.527246	0.524774	0.690645	-0.440871	-0.331469	-0.664351	STYX	0.287849	0.167356	-0.478897	0.0947985	CENTER
AFG2H_244	sp|Q3UMC0|AFG2H_MOUSE	Q3UMC0	244	0.998	DLSFQLSQLDLKEPQSPSSQSTPCKPTNDRT	S	P	S	S	4	2	2	-0.370242	NA	-0.324253	NA	NA	-0.541657	-0.256611	NA	STYX	-0.347247	0.0235472	-0.399134	0.246309	CENTER
AFG2H_273	sp|Q3UMC0|AFG2H_MOUSE	Q3UMC0	273	0.994	RTVNKAGEVLLDVTQSPRDGSGLGLEESTGL	S	P	R	D	8	5	3	0.38547	-0.251292	0.120674	-0.0998354	-0.130235	-0.0431566	-0.0924514	0.201163	STYX	0.00495635	0.479135	0.0218518	0.907024	CENTER
AFG2H_65	sp|Q3UMC0|AFG2H_MOUSE	Q3UMC0	65	0.979	FLEKVDGKVPKTFQNSLVHLGLNTMKSANIC	S	L	V	H	4	2	2	1.02815	NA	NA	NA	-0.154091	NA	0.162232	-0.169438	STYX	0.437029	0.757617	-0.00360315	0.986346	CENTER
AFTIN_151	sp|Q80WT5|AFTIN_MOUSE	Q80WT5	151	0.997	KVVVQGPSTGQLRSFSPGDFRTDKNIVHQTK	S	P	G	D	8	5	3	0.213036	-0.406845	-0.0200065	-0.0291579	-0.232584	0.434461	0.0866701	0.486834	STYX	-0.0951115	0.188132	0.335988	0.230519	CENTER
AFTIN_395	sp|Q80WT5|AFTIN_MOUSE	Q80WT5	395	0.998	IGSSKEENRKLTNPKSPDPDPTGQNALDDSA	S	P	D	P	7	5	2	0.152492	0.0766133	-0.00703129	-0.157684	0.00364818	-0.0258327	NA	0.568791	STYX	0.0136077	0.778141	0.271479	0.465906	CENTER
AFTIN_679 680	sp|Q80WT5|AFTIN_MOUSE	Q80WT5	679 680	0.89	VEEEVSSLKHLLETHSSPAKTREALADRGEL EEEVSSLKHLLETHSSPAKTREALADRGELR	S	S	P	A	7	4	3	NA	0.18182	-0.110165	-0.0671086	-0.102938	0.627362	1.423	0.883173	STYX	-0.024598	0.347135	0.977845	0.0147814	NR
AFTIN_680	sp|Q80WT5|AFTIN_MOUSE	Q80WT5	680	0.992	EEEVSSLKHLLETHSSPAKTREALADRGELR	S	P	A	K	5	2	3	0.195796	-0.298436	NA	NA	NA	0.68452	0.648592	0.925728	STYX	-0.05132	0.676901	0.752947	0.0269302	CENTER
AGAP1_521	sp|Q8BXK8|AGAP1_MOUSE	Q8BXK8	521	1	PSISSSTSPKLDPPPSPHANRKKHRRKKSTS	S	P	H	A	8	5	3	-0.0723808	-0.0882785	-0.0065702	0.0376177	0.343228	-0.340856	-0.141323	-0.34698	STYX	0.0427232	0.788485	-0.276386	0.298878	CENTER
AGAP1_836	sp|Q8BXK8|AGAP1_MOUSE	Q8BXK8	836	0.998	LLQYGCPDERFVLMATPNLSRKSNSRNNSSG	T	P	N	L	5	2	3	0.359962	-0.641553	NA	NA	NA	-0.347264	-0.603366	0.184996	STYX	-0.140795	0.810207	-0.255211	0.393073	CENTER
AGAP3_477 478	sp|Q8VHH5|AGAP3_MOUSE	Q8VHH5	477 478	0.894	PGKRLPRATPTTAPGTSPRANGLAMERSNTQ GKRLPRATPTTAPGTSPRANGLAMERSNTQL	T	S	P	R	7	5	2	-0.294948	0.619756	0.688164	0.863	0.499487	-0.0761258	NA	-0.354823	STYX	0.475092	0.0308324	-0.215474	0.51576	CENTER
AGAP3_478	sp|Q8VHH5|AGAP3_MOUSE	Q8VHH5	478	0.994	GKRLPRATPTTAPGTSPRANGLAMERSNTQL	S	P	R	A	5	2	3	-0.127012	0.226101	NA	NA	NA	-0.615093	-0.678779	-0.803037	STYX	0.0495445	0.976288	-0.69897	0.0264449	CENTER
AGAP3_573	sp|Q8VHH5|AGAP3_MOUSE	Q8VHH5	573	0.998	PAESLSSSPKLEPPPSPHSNRKKHRGKKSTG	S	P	H	S	8	5	3	0.0625854	0.149022	-0.0360339	-0.0524754	-0.184655	-0.667618	-0.389655	-0.388323	STYX	-0.0123114	0.499958	-0.481865	0.0932496	CENTER
AGFG1_177	sp|Q8K2K6|AGFG1_MOUSE	Q8K2K6	177	0.99	SLLGESAPALHLNKGTPSQSPVVGRSQGQQQ	T	P	S	Q	5	3	2	NA	-0.21297	0.115336	NA	-0.218629	0.369099	0.295283	NA	STYX	-0.105421	0.190603	0.332191	0.312333	CENTER
AGFG1_179	sp|Q8K2K6|AGFG1_MOUSE	Q8K2K6	179	0.987	LGESAPALHLNKGTPSQSPVVGRSQGQQQEK	S	Q	S	P	6	4	2	NA	-0.687224	0.220215	0.166352	0.101975	-0.00337621	NA	-0.0569974	STYQ	-0.0496709	0.726965	-0.0301868	0.942362	CENTER
AGFG1_181	sp|Q8K2K6|AGFG1_MOUSE	Q8K2K6	181	0.999	ESAPALHLNKGTPSQSPVVGRSQGQQQEKKQ	S	P	V	V	8	5	3	0.0780577	-0.193646	-0.0895604	0.069375	0.121011	0.494737	0.211994	0.448367	STYX	-0.00295261	0.650971	0.385032	0.169676	CENTER
AGM1_498	sp|Q9CYR6|AGM1_MOUSE	Q9CYR6	498	0.974	DLVKKYTLARAFVRPSGTEDIVRVYAEANSQ	S	G	T	E	7	4	3	0.716398	-0.00644562	NA	-0.115414	-0.211177	-0.645054	-0.836059	-0.435737	STYX	0.0958404	0.568928	-0.63895	0.039376	CENTER
AGM1_64	sp|Q9CYR6|AGM1_MOUSE	Q9CYR6	64	0.998	RSKQTRSTIGVMVTASHNPEEDNGVKLVDPL	S	H	N	P	6	3	3	-0.483603	0.245839	0.110005	NA	NA	-0.314653	-1.20443	-0.156065	STYX	-0.0425864	0.996319	-0.558381	0.124973	CENTER
AGO2_388	sp|Q8CJG0|AGO2_MOUSE	Q8CJG0	388	0.993	APDRQEEISKLMRSASFNTDPYVREFGIMVK	S	F	N	T	7	4	3	0.408453	-0.404517	0.0573723	NA	-0.0257216	-0.835134	-1.35174	-0.818001	STYX	0.00889664	0.824833	-1.00163	0.00909212	NR
AGRA2_1104	sp|Q91ZV8|AGRA2_MOUSE	Q91ZV8	1104	0.999	SHVPARALPTATEDGSPVLGEGPASLKSSPS	S	P	V	L	7	4	3	NA	0.0552654	0.360913	0.00231741	-0.0516513	-0.596195	-0.700143	-0.603537	STYX	0.0917111	0.729139	-0.633292	0.0366612	CENTER
AGRL2_1458	sp|Q8JZZ7|AGRL2_MOUSE	Q8JZZ7	1458	0.998	AGRHLHMCYQISRGNSDGYIIPINKEGCIPE	S	D	G	Y	5	2	3	0.362368	-0.250123	NA	NA	NA	-1.27959	-2.03353	-2.02421	STYX	0.0561227	0.934285	-1.77911	0.003147	NR
AGTRA_356	sp|P29754|AGTRA_MOUSE	P29754	356	0.999	PSDNMSSAAKKPASCSEVE____________	S	E	V	E	4	2	2	0.339446	NA	NA	0.0463199	NA	NA	0.15792	0.0218375	STYX	0.192883	0.304015	0.0898786	0.750029	CENTER
AHDC1_1060	sp|Q6PAL7|AHDC1_MOUSE	Q6PAL7	1060	0.997	SAPTPLRCDSRASTVSPGGYMVPKGTTASAA	S	P	G	G	8	5	3	0.562456	-0.641578	-0.280529	-0.361395	-0.100166	-0.0923634	-0.133117	-0.138245	STYX	-0.164243	0.0560459	-0.121242	0.655417	CENTER
AHDC1_1088	sp|Q6PAL7|AHDC1_MOUSE	Q6PAL7	1088	0.999	SAASVASSSSSSFQPSPENCRQFVGASQWPF	S	P	E	N	6	4	2	-0.747625	NA	-0.120286	-0.116802	0.107856	0.287552	0.347543	NA	STYX	-0.219214	0.0965132	0.317548	0.329415	CENTER
AHDC1_1180	sp|Q6PAL7|AHDC1_MOUSE	Q6PAL7	1180	0.999	QFSQPVGGGGFRRANSEASSSEGQSSLSSLE	S	E	A	S	5	3	2	NA	0.0390105	0.298144	NA	-0.019045	0.314901	NA	-1.0062	STYX	0.106036	0.588014	-0.345649	0.541578	CENTER
AHDC1_1391 1392	sp|Q6PAL7|AHDC1_MOUSE	Q6PAL7	1391 1392	0.898	LAHPPTVFDAGLQKAYSPTCSPTLGFKEELR AHPPTVFDAGLQKAYSPTCSPTLGFKEELRP	Y	S	P	T	6	3	3	NA	-0.599957	0.160104	NA	-0.439216	0.205265	0.415743	0.975113	STYX	-0.293023	0.142201	0.53204	0.104873	CENTER
AHDC1_1396	sp|Q6PAL7|AHDC1_MOUSE	Q6PAL7	1396	0.998	TVFDAGLQKAYSPTCSPTLGFKEELRPPPSK	S	P	T	L	5	2	3	0.622863	-0.327285	NA	NA	NA	0.132677	-0.184369	0.500849	STYX	0.147789	0.998497	0.149719	0.600418	CENTER
AHDC1_1467	sp|Q6PAL7|AHDC1_MOUSE	Q6PAL7	1467	0.998	CKGTAYWYPPGSAARSPPYEGKVGSGLLADF	S	P	P	Y	6	3	3	0.523943	-0.321708	-0.227086	NA	NA	-0.146851	-0.370712	-0.252801	STYX	-0.00828367	0.390633	-0.256788	0.334058	CENTER
AHDC1_1498	sp|Q6PAL7|AHDC1_MOUSE	Q6PAL7	1498	0.999	LGRTEAVCLSAPHLASPPATPKADKEPLEMA	S	P	P	A	8	5	3	0.329446	-0.0553233	0.070188	0.0568791	-0.391918	-0.470214	-0.441738	-0.883267	STYX	0.00185439	0.824889	-0.598406	0.0517775	CENTER
AHDC1_1540	sp|Q6PAL7|AHDC1_MOUSE	Q6PAL7	1540	0.997	ATAGYGCPLLSDLTLSPVPRDSLLPLQDTAY	S	P	V	P	5	2	3	0.733665	-0.26002	NA	NA	NA	0.0239608	-0.355916	0.175334	STYX	0.236822	0.928687	-0.0522072	0.874897	CENTER
AHDC1_892	sp|Q6PAL7|AHDC1_MOUSE	Q6PAL7	892	0.999	AQRGLATFPSRGAKASPVAVGSSGAGADPSF	S	P	V	A	8	5	3	0.369379	0.186057	0.105596	0.0860804	-0.147181	-0.0879361	-0.109437	-0.239207	STYX	0.119986	0.365091	-0.145527	0.59078	CENTER
AHI1_181	sp|Q8K3E5|AHI1_MOUSE	Q8K3E5	181	1	EDTNGDGVHEITSRDSPVHPKCLLDDDLVMG	S	P	V	H	7	4	3	NA	1.3036	-0.0632931	-0.304824	0.287983	1.26953	0.966258	2.3868	STYX	0.305867	0.751789	1.54086	0.00563869	NR
AHI1_855 856	sp|Q8K3E5|AHI1_MOUSE	Q8K3E5	855 856	0.871	VIRSCAAKVNKNLSMTSPPPGPAKKPRVKQS IRSCAAKVNKNLSMTSPPPGPAKKPRVKQSF	T	S	P	P	7	4	3	0.0420846	0.111968	-0.0674593	NA	-0.0883214	0.339685	0.533455	0.629616	STYX	-0.000432058	0.611594	0.500919	0.0920302	CENTER
AHI1_856	sp|Q8K3E5|AHI1_MOUSE	Q8K3E5	856	0.99	IRSCAAKVNKNLSMTSPPPGPAKKPRVKQSF	S	P	P	P	5	2	3	0.429818	-0.101935	NA	NA	NA	0.535588	0.15996	0.198609	STYX	0.163941	0.741351	0.298052	0.276457	CENTER
AHI1_974	sp|Q8K3E5|AHI1_MOUSE	Q8K3E5	974	0.999	SETLYRDSPPKVKERSPPLTPKEKTKPEKPL	S	P	P	L	8	5	3	0.467614	-0.105963	-0.158688	-0.132662	-0.0306101	0.807691	0.765625	0.685353	STYX	0.00793822	0.283103	0.75289	0.025647	CENTER
AIDA_161	sp|Q8C4Q6|AIDA_MOUSE	Q8C4Q6	161	0.999	SFSARVPGTLLPRLPSEPGMTLLTIRIEKIG	S	E	P	G	5	2	3	0.709811	-0.370001	NA	NA	NA	0.741756	-0.118319	0.182975	STYX	0.169905	0.998759	0.268804	0.396936	CENTER
AIFM1_267	sp|Q9Z0X1|AIFM1_MOUSE	Q9Z0X1	267	0.993	FEKCLIATGGTPRSLSAIDRAGAEVKSRTTL	S	A	I	D	7	5	2	0.125224	-0.530294	0.46974	-0.0131738	-0.0743345	-0.46929	0.0241485	NA	STYX	-0.00456771	0.752694	-0.222571	0.526288	CENTER
AIMP2_34 35 36	sp|Q8R010|AIMP2_MOUSE	Q8R010	34 35 36	0.885	ELPTCMYRLPNVHSKTTSPATDAGHVQETSE LPTCMYRLPNVHSKTTSPATDAGHVQETSEP PTCMYRLPNVHSKTTSPATDAGHVQETSEPS	T	T	S	P	7	5	2	-0.332061	0.10561	0.160393	0.294651	-0.151182	0.23565	NA	-0.257463	STYX	0.0154822	0.921915	-0.0109067	0.986738	CENTER
AIMP2_36	sp|Q8R010|AIMP2_MOUSE	Q8R010	36	0.987	PTCMYRLPNVHSKTTSPATDAGHVQETSEPS	S	P	A	T	8	5	3	-0.560785	0.160831	0.018413	0.593494	-0.179657	0.209013	0.0327771	-0.170377	STYX	0.00645909	0.748138	0.0238043	0.900987	CENTER
AJUBA_129	sp|Q91XC0|AJUBA_MOUSE	Q91XC0	129	0.999	SSPPDFRLETTAPALSPRSSFASSSASDASK	S	P	R	S	6	3	3	0.537262	-0.804669	NA	NA	-0.0599148	-0.408704	-0.397213	-0.738135	STYX	-0.109107	0.609657	-0.514684	0.0788063	CENTER
AJUBA_146 147	sp|Q91XC0|AJUBA_MOUSE	Q91XC0	146 147	0.878	RSSFASSSASDASKPSSPRGSLLLDGAGASG SSFASSSASDASKPSSPRGSLLLDGAGASGA	S	S	P	R	8	5	3	-0.504154	-0.0115225	0.168665	-0.103521	0.321236	-0.610655	-0.994705	-0.694435	STYX	-0.0258592	0.704928	-0.766599	0.0208585	CENTER
AJUBA_147	sp|Q91XC0|AJUBA_MOUSE	Q91XC0	147	0.997	SSFASSSASDASKPSSPRGSLLLDGAGASGA	S	P	R	G	8	5	3	-0.95932	0.0658394	0.273614	0.213382	0.694262	-0.937584	-1.18519	-1.08118	STYX	0.0575554	0.28236	-1.06798	0.00643738	NR
AJUBA_239	sp|Q91XC0|AJUBA_MOUSE	Q91XC0	239	0.979	CAHRSVGFGCQESRHSYPPALGSPGALTGAV	S	Y	P	P	4	2	2	0.246515	-0.0428043	NA	NA	NA	NA	-0.182594	-0.196421	STYX	0.101855	0.691093	-0.189508	0.557307	CENTER
AJUBA_272	sp|Q91XC0|AJUBA_MOUSE	Q91XC0	272	0.996	TAGPLERRGAQPGRHSVTGYGDCAAGARYQD	S	V	T	G	8	5	3	-0.755123	-0.424775	-0.105949	0.0825277	0.477603	-0.42762	-0.0868736	-0.719947	STYX	-0.145143	0.266048	-0.41148	0.167115	CENTER
AK17B_704	sp|A2A3V1|AK17B_MOUSE	A2A3V1	704	0.998	KIHSHGVKDSQHIRKSPVSSSLRSVDVGLPL	S	P	V	S	8	5	3	0.230816	-0.221737	0.0257399	-0.157723	-0.490765	-0.952829	-0.947947	-0.733842	STYX	-0.122734	0.13869	-0.878206	0.0119267	NR
AK1A1_210 211	sp|Q9JII6|AK1A1_MOUSE	Q9JII6	210 211	0.896	ELIAHCHARGLEVTAYSPLGSSDRAWRHPDE LIAHCHARGLEVTAYSPLGSSDRAWRHPDEP	Y	S	P	L	4	2	2	NA	-0.0390123	NA	NA	0.0649144	-0.107961	NA	-0.446167	STYX	0.0129511	0.84158	-0.277064	0.411444	CENTER
AKA10_187	sp|O88845|AKA10_MOUSE	O88845	187	0.997	HSLNTVKQSSLAEPVSPSKRHETPASSVTEA	S	P	S	K	7	4	3	0.670775	0.189715	-0.188706	NA	-0.294534	0.279308	0.21082	0.173374	STYX	0.0943123	0.861976	0.221167	0.377848	CENTER
AKA10_255	sp|O88845|AKA10_MOUSE	O88845	255	0.973	QEGHSARSLHREVARTGSHQIPTDSQDSSSR	T	G	S	H	4	2	2	NA	NA	-0.0610206	NA	0.406406	-0.353816	0.140782	NA	STYX	0.172693	0.61508	-0.106517	0.765228	CENTER
AKA10_280 281	sp|O88845|AKA10_MOUSE	O88845	280 281	0.893	QDSSSRLAVGSRNSCSSPLRELSEKLMKSIE DSSSRLAVGSRNSCSSPLRELSEKLMKSIEQ	S	S	P	L	7	5	2	-0.176453	0.130819	-0.187893	-0.0693219	-0.150913	0.612804	NA	0.875339	STYX	-0.0907523	0.0737997	0.744071	0.0729265	CENTER
AKA10_52	sp|O88845|AKA10_MOUSE	O88845	52	0.999	KTLDVKSTKASVAVHSPQKSTKNHALLEAAG	S	P	Q	K	8	5	3	1.02246	-0.215026	0.370597	-0.0646521	0.329456	0.645107	0.175084	-0.00411007	STYX	0.288566	0.327003	0.272027	0.355145	CENTER
AKA12_1190	sp|Q9WTQ5|AKA12_MOUSE	Q9WTQ5	1190	0.984	QVTEEEAAAAQTEGPSTPSSFPAQEEHREKP	S	T	P	S	4	2	2	-1.4843	NA	NA	0.168798	NA	0.00027405	-0.348945	NA	STYX	-0.657752	0.539412	-0.174336	0.602244	CENTER
AKA12_1285	sp|Q9WTQ5|AKA12_MOUSE	Q9WTQ5	1285	0.998	RDSEVMEVARCQETESNEEQSISPEKREMGT	S	N	E	E	8	5	3	-0.818888	-0.111972	0.0108051	-0.0662975	0.0242318	-0.195045	-0.0453317	-0.163228	STYX	-0.192424	0.0958452	-0.134535	0.616793	CENTER
AKA12_1290	sp|Q9WTQ5|AKA12_MOUSE	Q9WTQ5	1290	0.998	MEVARCQETESNEEQSISPEKREMGTDVEKE	S	I	S	P	6	4	2	NA	0.0521392	-0.109384	-0.0785124	-0.0223084	0.145671	NA	-0.0481523	STYX	-0.0395165	0.28967	0.0487595	0.852096	CENTER
AKA12_1292	sp|Q9WTQ5|AKA12_MOUSE	Q9WTQ5	1292	0.999	VARCQETESNEEQSISPEKREMGTDVEKEET	S	P	E	K	8	5	3	-0.617642	-0.140686	-0.161099	-0.101109	0.0210391	0.551825	0.455369	0.409118	STYX	-0.199899	0.0198114	0.472104	0.10396	CENTER
AKA12_1355	sp|Q9WTQ5|AKA12_MOUSE	Q9WTQ5	1355	0.982	MPHSERGKALGSLEGSPSLPDQDKADCIEVQ	S	P	S	L	5	2	3	0.288296	-0.015051	NA	NA	NA	-0.135111	-0.0470563	0.539771	STYX	0.136623	0.533583	0.119201	0.704593	CENTER
AKA12_1645	sp|Q9WTQ5|AKA12_MOUSE	Q9WTQ5	1645	0.998	LAKAEADASGNLTKESPDTNGPKLTEEGDAL	S	P	D	T	7	4	3	-0.430131	-0.028785	0.211417	NA	-0.294603	-0.806039	-1.17173	-1.43465	STYX	-0.135526	0.185002	-1.13747	0.00645304	NR
AKA12_194	sp|Q9WTQ5|AKA12_MOUSE	Q9WTQ5	194	0.999	QLLTVKKDEGEGAEASVGAGDHQEPGVETVG	S	V	G	A	4	2	2	-1.15506	0.107461	NA	NA	NA	-0.324211	NA	-0.100854	STYX	-0.523798	0.40163	-0.212533	0.519788	CENTER
AKA12_234	sp|Q9WTQ5|AKA12_MOUSE	Q9WTQ5	234	0.993	KQSTEKQEGTLKQAQSSTEIPLQAESGQGTE	S	S	T	E	6	3	3	-0.669412	0.0541673	0.0384931	NA	NA	-0.48306	-0.571886	-0.125447	STYX	-0.192251	0.400748	-0.393465	0.16802	CENTER
AKA12_234 235 236	sp|Q9WTQ5|AKA12_MOUSE	Q9WTQ5	234 235 236	0.898	KQSTEKQEGTLKQAQSSTEIPLQAESGQGTE QSTEKQEGTLKQAQSSTEIPLQAESGQGTEE STEKQEGTLKQAQSSTEIPLQAESGQGTEEE	S	S	T	E	8	5	3	-0.508179	0.256665	0.133769	0.284992	-0.0756319	-0.224217	-0.371883	-0.0105097	STYX	0.0183229	0.796147	-0.202203	0.450261	CENTER
AKA12_270	sp|Q9WTQ5|AKA12_MOUSE	Q9WTQ5	270	0.996	DGEENREKEPTKPLESPTSPVSNETTSSFKK	S	P	T	S	5	2	3	0.0241691	-0.158642	NA	NA	NA	-0.800944	-0.500126	-0.331306	STYX	-0.0672365	0.355383	-0.544125	0.0706384	CENTER
AKA12_282	sp|Q9WTQ5|AKA12_MOUSE	Q9WTQ5	282	0.992	PLESPTSPVSNETTSSFKKFFTHGWAGWRKK	S	F	K	K	4	2	2	0.0400158	-0.0877195	NA	NA	NA	-0.286289	NA	-0.306064	STYX	-0.0238518	0.560612	-0.296176	0.361727	CENTER
AKA12_350	sp|Q9WTQ5|AKA12_MOUSE	Q9WTQ5	350	0.996	AEEQEPAEGTDQARLSADYEKVELPLEDQVG	S	A	D	Y	5	2	3	1.13695	-0.200372	NA	NA	NA	-0.432451	0.493842	1.13512	STYX	0.46829	0.83288	0.398838	0.348643	CENTER
AKA12_488 489	sp|Q9WTQ5|AKA12_MOUSE	Q9WTQ5	488 489	0.894	LPKHPEGIVSEVEMLSSQERIKVQGSPLKKL PKHPEGIVSEVEMLSSQERIKVQGSPLKKLF	S	S	Q	E	5	3	2	0.210963	0.0598254	0.165805	NA	NA	-0.353222	NA	-0.320604	STYX	0.145531	0.226027	-0.336913	0.301557	CENTER
AKA12_489	sp|Q9WTQ5|AKA12_MOUSE	Q9WTQ5	489	0.993	PKHPEGIVSEVEMLSSQERIKVQGSPLKKLF	S	Q	E	R	4	2	2	-0.0740399	-0.123105	NA	NA	NA	NA	-0.47246	-0.194926	STYQ	-0.0985724	0.17613	-0.333693	0.320321	CENTER
AKA12_498	sp|Q9WTQ5|AKA12_MOUSE	Q9WTQ5	498	1	EVEMLSSQERIKVQGSPLKKLFSSSGLKKLS	S	P	L	K	8	5	3	-0.257418	-0.529513	0.139538	0.568849	-0.0503328	0.490995	0.183283	-0.321393	STYX	-0.0257754	0.490724	0.117628	0.681795	CENTER
AKA12_505	sp|Q9WTQ5|AKA12_MOUSE	Q9WTQ5	505	0.993	QERIKVQGSPLKKLFSSSGLKKLSGKKQKGK	S	S	S	G	7	4	3	-0.163577	-0.684717	NA	0.516594	-0.0923412	-0.6767	-0.89199	-1.14007	STYX	-0.10601	0.23385	-0.902919	0.012022	NR
AKA12_505 506 507	sp|Q9WTQ5|AKA12_MOUSE	Q9WTQ5	505 506 507	0.897	QERIKVQGSPLKKLFSSSGLKKLSGKKQKGK ERIKVQGSPLKKLFSSSGLKKLSGKKQKGKR RIKVQGSPLKKLFSSSGLKKLSGKKQKGKRG	S	S	S	G	7	4	3	0.259074	-0.657287	NA	0.395593	-0.155357	-0.536969	-0.915134	-0.867229	STYX	-0.0394941	0.855429	-0.773111	0.0204626	CENTER
AKA12_506	sp|Q9WTQ5|AKA12_MOUSE	Q9WTQ5	506	0.959	ERIKVQGSPLKKLFSSSGLKKLSGKKQKGKR	S	S	G	L	4	2	2	NA	-0.650481	NA	0.625045	NA	-0.596132	-0.753001	NA	STYX	-0.0127177	0.933504	-0.674567	0.0757983	CENTER
AKA12_507	sp|Q9WTQ5|AKA12_MOUSE	Q9WTQ5	507	0.994	RIKVQGSPLKKLFSSSGLKKLSGKKQKGKRG	S	G	L	K	5	2	3	0.608145	-0.944645	NA	NA	NA	-0.16379	-0.706373	-0.0881472	STYX	-0.16825	0.922313	-0.319437	0.290866	CENTER
AKA12_583 584	sp|Q9WTQ5|AKA12_MOUSE	Q9WTQ5	583 584	0.897	GPSEAPQEAEAEEGATSDGEKKREGITPWAS PSEAPQEAEAEEGATSDGEKKREGITPWASF	T	S	D	G	7	5	2	-0.551709	0.724776	0.190887	-0.253017	-0.0310039	-0.0665743	-0.41704	NA	STYX	0.0159864	0.623763	-0.241807	0.472846	CENTER
AKA12_584	sp|Q9WTQ5|AKA12_MOUSE	Q9WTQ5	584	0.996	PSEAPQEAEAEEGATSDGEKKREGITPWASF	S	D	G	E	5	3	2	-0.379844	0.923567	NA	-0.18398	NA	0.0219493	-0.172255	NA	STYX	0.119914	0.453557	-0.0751529	0.828921	CENTER
AKA12_594	sp|Q9WTQ5|AKA12_MOUSE	Q9WTQ5	594	0.999	EEGATSDGEKKREGITPWASFKKMVTPKKRV	T	P	W	A	7	4	3	-0.0305803	-0.79052	NA	-0.0485835	-0.474817	0.215645	0.592796	0.00536876	STYX	-0.336125	0.0246049	0.27127	0.343374	CENTER
AKA12_598	sp|Q9WTQ5|AKA12_MOUSE	Q9WTQ5	598	0.999	TSDGEKKREGITPWASFKKMVTPKKRVRRPS	S	F	K	K	8	5	3	-0.189567	-0.478807	-0.214971	0.156145	-0.0662079	-0.346202	-1.25395	-0.377312	STYX	-0.158682	0.0484575	-0.659155	0.0636926	CENTER
AKA12_613	sp|Q9WTQ5|AKA12_MOUSE	Q9WTQ5	613	0.997	SFKKMVTPKKRVRRPSESDKEEELDKVKSAT	S	E	S	D	8	5	3	0.144514	0.482968	0.108024	-0.216923	0.0609827	-0.694953	-0.262372	-0.581253	STYX	0.115913	0.473684	-0.512859	0.0838256	CENTER
AKA12_630 631 632	sp|Q9WTQ5|AKA12_MOUSE	Q9WTQ5	630 631 632	0.895	SDKEEELDKVKSATLSSTESTASGMQDEVRA DKEEELDKVKSATLSSTESTASGMQDEVRAV KEEELDKVKSATLSSTESTASGMQDEVRAVG	S	S	T	E	8	5	3	-0.413038	0.330277	-0.0475555	-0.182174	-0.0929857	0.0233641	0.0293163	-0.135377	STYX	-0.0810953	0.150546	-0.0275656	0.937707	CENTER
AKA12_630 631 632 637	sp|Q9WTQ5|AKA12_MOUSE	Q9WTQ5	630 631 632 637	0.899	SDKEEELDKVKSATLSSTESTASGMQDEVRA DKEEELDKVKSATLSSTESTASGMQDEVRAV KEEELDKVKSATLSSTESTASGMQDEVRAVG DKVKSATLSSTESTASGMQDEVRAVGEEQRS	S	S	T	E	5	3	2	-0.600777	0.116547	NA	0.153067	NA	0.0112189	-0.122534	NA	STYX	-0.110387	0.849991	-0.0556573	0.876174	CENTER
AKA12_631	sp|Q9WTQ5|AKA12_MOUSE	Q9WTQ5	631	0.994	DKEEELDKVKSATLSSTESTASGMQDEVRAV	S	T	E	S	7	5	2	-0.448784	1.13739	0.111783	-0.0316761	0.192223	NA	-0.0914418	0.0908138	STYX	0.192188	0.642565	-0.00031397	0.97446	CENTER
AKA12_634	sp|Q9WTQ5|AKA12_MOUSE	Q9WTQ5	634	0.993	EELDKVKSATLSSTESTASGMQDEVRAVGEE	S	T	A	S	5	2	3	NA	0.0146224	NA	NA	-0.0428209	-0.641745	-0.49299	-0.604347	STYX	-0.0140993	0.622006	-0.579694	0.0499699	CENTER
AKA12_634 635	sp|Q9WTQ5|AKA12_MOUSE	Q9WTQ5	634 635	0.899	EELDKVKSATLSSTESTASGMQDEVRAVGEE ELDKVKSATLSSTESTASGMQDEVRAVGEEQ	S	T	A	S	8	5	3	-0.578695	0.174642	0.138774	0.131375	-0.142204	-0.374964	-0.0579795	-0.0249021	STYX	-0.0552217	0.783388	-0.152615	0.578286	CENTER
AKA12_635	sp|Q9WTQ5|AKA12_MOUSE	Q9WTQ5	635	0.995	ELDKVKSATLSSTESTASGMQDEVRAVGEEQ	T	A	S	G	5	3	2	-0.202549	-0.157868	-0.0327896	NA	NA	-0.16291	NA	-0.334104	STYX	-0.131069	0.069132	-0.248507	0.447582	CENTER
AKA12_637	sp|Q9WTQ5|AKA12_MOUSE	Q9WTQ5	637	1	DKVKSATLSSTESTASGMQDEVRAVGEEQRS	S	G	M	Q	8	5	3	-0.197022	0.377068	-0.0602155	-0.0162516	-0.00920484	-0.247488	-0.246074	-0.431767	STYX	0.0188747	0.53691	-0.308443	0.250384	CENTER
AKA12_652	sp|Q9WTQ5|AKA12_MOUSE	Q9WTQ5	652	1	SGMQDEVRAVGEEQRSEEPKRRVDTSVSWEA	S	E	E	P	8	5	3	-0.223171	0.659596	0.0986176	0.0195328	-0.0249771	-0.277386	-0.169507	-0.151732	STYX	0.10592	0.955114	-0.199542	0.452349	CENTER
AKA12_682	sp|Q9WTQ5|AKA12_MOUSE	Q9WTQ5	682	0.974	ALICVGSSKKRARKASSSDDEGGPRTLGGDG	S	S	S	D	5	2	3	-2.38933	2.90473	NA	NA	NA	1.61286	1.0986	-0.390987	STYX	0.257701	0.996929	0.773492	0.166499	CENTER
AKA12_767	sp|Q9WTQ5|AKA12_MOUSE	Q9WTQ5	767	0.999	PRKKSKSKLEERAEDSGAEQLASEIEPSREE	S	G	A	E	6	3	3	0.0744112	-0.0678858	NA	NA	-0.240084	0.146254	0.23443	0.552294	STYX	-0.077853	0.27089	0.310993	0.26078	CENTER
AKA12_783	sp|Q9WTQ5|AKA12_MOUSE	Q9WTQ5	783	0.998	GAEQLASEIEPSREESWVSIKKFIPGRRKKR	S	W	V	S	5	2	3	-0.206811	0.020595	NA	NA	NA	0.237975	-0.379905	-0.134878	STYX	-0.093108	0.294637	-0.0922692	0.743782	CENTER
AKA12_811	sp|Q9WTQ5|AKA12_MOUSE	Q9WTQ5	811	0.999	KKRADGKQEQAAVEDSGPGEINEDDPDVPAV	S	G	P	G	4	2	2	-0.0816737	0.163083	NA	NA	NA	NA	-0.0600266	1.19122	STYX	0.0407048	0.981905	0.565599	0.301021	CENTER
AKA12_861	sp|Q9WTQ5|AKA12_MOUSE	Q9WTQ5	861	0.997	QENVELPQLKGAVYVSEELSKTLVHTVSVAV	S	E	E	L	4	2	2	0.303615	-0.178325	NA	NA	NA	NA	0.623651	0.219559	STYX	0.062645	0.973023	0.421605	0.240683	CENTER
AKA12_890	sp|Q9WTQ5|AKA12_MOUSE	Q9WTQ5	890	0.998	AVIDGTRAVTSAEERSPSWISASMTEPLEHA	S	P	S	W	7	4	3	-0.0542275	-0.0353885	0.226527	NA	0.0993617	0.0499734	-0.28853	-0.374129	STYX	0.0590681	0.850343	-0.204229	0.454443	CENTER
AKA12_892	sp|Q9WTQ5|AKA12_MOUSE	Q9WTQ5	892	0.997	IDGTRAVTSAEERSPSWISASMTEPLEHAEG	S	W	I	S	5	2	3	-0.00606785	0.0591793	NA	NA	NA	-0.0745066	-0.694881	-0.273258	STYX	0.0265557	0.96545	-0.347548	0.240655	CENTER
AKA12_899	sp|Q9WTQ5|AKA12_MOUSE	Q9WTQ5	899	0.99	TSAEERSPSWISASMTEPLEHAEGVATPPVG	T	E	P	L	5	2	3	0.234271	0.155964	NA	NA	NA	-0.218377	-0.27599	-0.493073	STYX	0.195117	0.17945	-0.329146	0.227363	CENTER
AKA12_910	sp|Q9WTQ5|AKA12_MOUSE	Q9WTQ5	910	0.999	SASMTEPLEHAEGVATPPVGEVTEKDITAEA	T	P	P	V	5	2	3	0.151399	0.145168	NA	NA	NA	0.401351	0.212021	0.20211	STYX	0.148283	0.282804	0.271827	0.29776	CENTER
AKAP1_101	sp|O08715|AKAP1_MOUSE	O08715	101	0.997	TEPLALPRTRQVRRRSESSGNLPSVADTRSQ	S	E	S	S	8	5	3	-0.779202	0.485817	0.135132	0.347015	0.233693	-0.58005	-0.385583	-0.210901	STYX	0.084491	0.190331	-0.392178	0.161637	CENTER
AKAP1_103	sp|O08715|AKAP1_MOUSE	O08715	103	0.996	PLALPRTRQVRRRSESSGNLPSVADTRSQPG	S	S	G	N	8	5	3	-0.292874	0.143984	0.156142	-0.0754892	0.501901	0.227178	0.358112	-0.0451851	STYX	0.0867329	0.756707	0.180035	0.488767	CENTER
AKAP1_103 104	sp|O08715|AKAP1_MOUSE	O08715	103 104	0.897	PLALPRTRQVRRRSESSGNLPSVADTRSQPG LALPRTRQVRRRSESSGNLPSVADTRSQPGP	S	S	G	N	8	5	3	-0.42139	0.189908	-0.0528692	-0.0637497	0.344806	-0.151355	0.271262	-0.0248311	STYX	-0.000658978	0.730703	0.0316919	0.892312	CENTER
AKAP1_138	sp|O08715|AKAP1_MOUSE	O08715	138	1	EIAKVELSLMGDKAKSIPLGCPLLPKDASFP	S	I	P	L	6	3	3	-0.117953	-0.574894	NA	NA	-0.658463	0.215545	0.225694	0.601002	STYX	-0.450437	0.00977086	0.347414	0.215939	CENTER
AKAP1_380	sp|O08715|AKAP1_MOUSE	O08715	380	0.998	TSDPASTRTGATASPSAEALPPKTYVSCLSS	S	A	E	A	8	5	3	-0.18033	-0.453784	0.255736	0.0276461	-0.206353	0.2145	-0.0798924	0.281322	STYX	-0.111417	0.146243	0.138643	0.578835	CENTER
AKAP1_55	sp|O08715|AKAP1_MOUSE	O08715	55	1	VETLKVGPAIKDRRLSEEACPGVLSVAPTVT	S	E	E	A	8	5	3	-0.137221	0.0897056	0.189079	0.354638	0.0642487	-0.363715	-0.400951	-0.31732	STYX	0.11209	0.415495	-0.360662	0.179177	CENTER
AKAP2_740	sp|O54931|AKAP2_MOUSE	O54931	740	0.996	MVGPFKLRSRKQRTLSMIEEEIRAAQEREEE	S	M	I	E	8	5	3	-0.108016	-0.949636	0.261831	0.359117	-0.353182	-0.805222	-1.61838	-0.851538	STYX	-0.157977	0.417218	-1.09171	0.00859328	NR
AKAP2_768	sp|O54931|AKAP2_MOUSE	O54931	768	0.996	EEELKRQRQVRQSTPSPRAKNAPSLPSRTTC	S	P	R	A	7	4	3	-0.46331	0.843381	0.0821	NA	0.1691	-0.997711	-0.750165	-1.60893	STYX	0.157818	0.539918	-1.11893	0.00793161	NR
AKAP3_177	sp|O88987|AKAP3_MOUSE	O88987	177	0.999	MGDEPTPHKSLSTVASELVNETVTACSKNIS	S	E	L	V	5	2	3	0.455808	-0.0368764	NA	NA	NA	1.48807	1.05302	1.1647	STYX	0.209466	0.500436	1.23526	0.00601263	NR
AKAP3_192 193	sp|O88987|AKAP3_MOUSE	O88987	192 193	0.893	SELVNETVTACSKNISSDKAPGSGDRASGSS ELVNETVTACSKNISSDKAPGSGDRASGSSQ	S	S	D	K	7	4	3	-0.281065	NA	1.29418	-0.274165	-0.0360733	0.989783	1.12475	0.249605	STYX	0.17572	0.345002	0.788045	0.0377693	CENTER
AKAP3_199	sp|O88987|AKAP3_MOUSE	O88987	199	0.999	VTACSKNISSDKAPGSGDRASGSSQAPGLRY	S	G	D	R	8	5	3	-0.483203	-0.232019	0.754717	-0.337211	0.0231868	2.03568	1.87664	1.39478	STYX	-0.0549057	0.159105	1.76903	0.00348111	NR
AKAP3_204	sp|O88987|AKAP3_MOUSE	O88987	204	0.998	KNISSDKAPGSGDRASGSSQAPGLRYTSTLK	S	G	S	S	8	5	3	-0.579211	0.0660243	0.668427	-0.333393	0.180631	1.13375	1.50968	0.618339	STYX	0.000495758	0.823115	1.08726	0.0115829	NR
AKAP3_206	sp|O88987|AKAP3_MOUSE	O88987	206	0.982	ISSDKAPGSGDRASGSSQAPGLRYTSTLKIK	S	S	Q	A	6	4	2	-0.0652324	-0.385497	NA	-0.102005	-0.1608	NA	1.7578	1.1448	STYX	-0.178383	0.0205277	1.4513	0.0211546	NR
AKAP3_206 207	sp|O88987|AKAP3_MOUSE	O88987	206 207	0.894	ISSDKAPGSGDRASGSSQAPGLRYTSTLKIK SSDKAPGSGDRASGSSQAPGLRYTSTLKIKE	S	S	Q	A	8	5	3	-0.00840632	-0.13655	1.08869	-0.445619	-0.415807	0.16079	0.268855	0.666823	STYX	0.0164613	0.166212	0.365489	0.206612	CENTER
AKAP3_260	sp|O88987|AKAP3_MOUSE	O88987	260	1	VFESRNAGDAKEGGRSLPGDQKLFRTSPDNR	S	L	P	G	7	5	2	-0.21119	-0.0732411	0.414993	0.00960725	-0.189343	0.980819	NA	1.32888	STYX	-0.00983475	0.303262	1.15485	0.0281048	NR
AKAP3_407	sp|O88987|AKAP3_MOUSE	O88987	407	0.996	FPENIRRARDKSESYSLISTKSRAGDPKLSN	S	L	I	S	5	3	2	NA	-0.443585	NA	-0.2512	0.138543	NA	0.0911374	1.14843	STYX	-0.185414	0.159208	0.619784	0.203595	CENTER
AKAP3_421	sp|O88987|AKAP3_MOUSE	O88987	421	1	YSLISTKSRAGDPKLSNLNFAMKSESKLKEN	S	N	L	N	8	5	3	0.0594036	-0.430892	0.995449	-0.126259	-0.3384	1.71519	0.837534	1.40921	STYX	0.0318604	0.268952	1.32064	0.00642436	NR
AKAP3_429	sp|O88987|AKAP3_MOUSE	O88987	429	0.995	RAGDPKLSNLNFAMKSESKLKENLFSTCKLE	S	E	S	K	6	3	3	0.141716	0.247954	NA	NA	-0.630576	0.650728	0.309458	1.28345	STYX	-0.0803021	0.923784	0.74788	0.0453345	CENTER
AKAP3_472	sp|O88987|AKAP3_MOUSE	O88987	472	1	IIKEGLHMWHKSQQKSPGLERAAKLGNAPQE	S	P	G	L	8	5	3	-0.265629	-0.0443341	0.312605	-0.033354	0.178876	2.05905	0.935892	0.789789	STYX	0.0296328	0.851187	1.26158	0.00963909	NR
AKAP3_576	sp|O88987|AKAP3_MOUSE	O88987	576	1	PPPPSPVVQDECKLKSPPHKICDQEQTEKKD	S	P	P	H	6	3	3	-0.710163	-0.133887	1.25622	NA	NA	2.70373	2.98421	2.41492	STYX	0.137391	0.499661	2.70095	0.00283493	NR
AKAP3_644	sp|O88987|AKAP3_MOUSE	O88987	644	1	IHPCERPKTPCERPITPPAPKFCEDEEATGG	T	P	P	A	8	5	3	0.12168	0.228404	0.0663485	-0.485054	-0.487328	1.67634	1.34282	1.23591	STYX	-0.11119	0.539508	1.41836	0.00449222	NR
AKAP3_67	sp|O88987|AKAP3_MOUSE	O88987	67	0.988	STAGFQDSRFKPGESSFVEEVAYPVDQRKGF	S	F	V	E	8	5	3	0.028926	0.184326	0.979899	-0.220505	-0.090686	1.77167	0.421582	1.06439	STYX	0.176392	0.920188	1.08588	0.0182614	NR
AKAP3_701	sp|O88987|AKAP3_MOUSE	O88987	701	0.997	DSVMKLCLIIAKSCDSPLSELGEEKCGDASR	S	P	L	S	8	5	3	0.45257	-0.164289	1.06073	-0.298198	-0.234211	1.07503	1.15703	1.77594	STYX	0.163321	0.613543	1.336	0.00560179	NR
AKAP3_756	sp|O88987|AKAP3_MOUSE	O88987	756	1	LQNAYLTIHNELRGLSGQPPEGCEIPKVIVS	S	G	Q	P	8	5	3	0.228765	-0.246607	0.929657	0.131838	-0.372363	1.31701	0.794203	1.33963	STYX	0.134258	0.882309	1.15028	0.00803597	NR
AKAP3_771	sp|O88987|AKAP3_MOUSE	O88987	771	0.999	SGQPPEGCEIPKVIVSNHNLADTVQNKQLQA	S	N	H	N	8	5	3	-0.101816	-0.172762	1.13635	0.0679902	-0.717166	1.51193	0.848382	1.0742	STYX	0.0425187	0.364269	1.14484	0.00818025	NR
AKAP3_818	sp|O88987|AKAP3_MOUSE	O88987	818	0.991	FAGDDEGIQEKLLQLSATAVEKGRSVGEVLQ	S	A	T	A	5	3	2	0.632073	NA	NA	0.267606	-0.313275	NA	0.50428	0.589394	STYX	0.195468	0.483827	0.546837	0.138783	CENTER
AKAP3_94	sp|O88987|AKAP3_MOUSE	O88987	94	0.999	RKGFCVDYYNTTNKGSPGRLHFEMSHKENPS	S	P	G	R	5	2	3	0.0439742	0.19712	NA	NA	NA	0.994512	0.797801	1.52688	STYX	0.120547	0.445724	1.1064	0.00948674	NR
AKAP4_130	sp|Q60662|AKAP4_MOUSE	Q60662	130	0.998	LNDLQKYALGFQHALSPSASSCKHKVGDLEG	S	P	S	A	8	5	3	0.235401	-1.13098	0.413342	-0.238409	-0.256478	1.02564	1.01725	0.958484	STYX	-0.195426	0.337955	1.00046	0.0100237	NR
AKAP4_132	sp|Q60662|AKAP4_MOUSE	Q60662	132	0.995	DLQKYALGFQHALSPSASSCKHKVGDLEGDY	S	A	S	S	8	5	3	0.152081	-1.23364	0.534055	0.0293296	-0.183628	0.723655	0.0891622	0.93135	STYX	-0.14036	0.739599	0.581389	0.0902634	CENTER
AKAP4_134	sp|Q60662|AKAP4_MOUSE	Q60662	134	0.993	QKYALGFQHALSPSASSCKHKVGDLEGDYSK	S	S	C	K	7	4	3	-0.0806155	-0.953294	0.841755	NA	-0.23148	1.26099	1.41646	0.968892	STYX	-0.105909	0.234214	1.21545	0.00632104	NR
AKAP4_134 135	sp|Q60662|AKAP4_MOUSE	Q60662	134 135	0.891	QKYALGFQHALSPSASSCKHKVGDLEGDYSK KYALGFQHALSPSASSCKHKVGDLEGDYSKI	S	S	C	K	6	3	3	-0.176876	-0.203529	0.678802	NA	NA	1.01828	1.27831	0.918862	STYX	0.0994658	0.527319	1.07182	0.00867809	NR
AKAP4_182	sp|Q60662|AKAP4_MOUSE	Q60662	182	1	YLNKGPQNLRLEMAASKNTNNNQSPSNPATK	S	K	N	T	4	2	2	0.601992	-0.668812	NA	NA	NA	1.34859	NA	1.2647	STYX	-0.0334101	0.927776	1.30665	0.021786	NR
AKAP4_190	sp|Q60662|AKAP4_MOUSE	Q60662	190	0.998	LRLEMAASKNTNNNQSPSNPATKSPSNQRSV	S	P	S	N	8	5	3	-0.801721	-0.308355	0.28217	-0.0837919	0.0906464	1.36926	1.1217	1.71332	STYX	-0.16421	0.264227	1.40142	0.00479093	NR
AKAP4_204	sp|Q60662|AKAP4_MOUSE	Q60662	204	0.99	QSPSNPATKSPSNQRSVATPEGECSMDDLSF	S	V	A	T	5	3	2	0.0733128	-0.221838	NA	0.0664706	NA	0.163389	NA	-0.696993	STYX	-0.0273517	0.628133	-0.266802	0.527679	CENTER
AKAP4_207	sp|Q60662|AKAP4_MOUSE	Q60662	207	0.999	SNPATKSPSNQRSVATPEGECSMDDLSFYVN	T	P	E	G	8	5	3	0.0503698	-0.0790094	0.424823	0.150004	-0.095571	0.679404	0.391134	0.400652	STYX	0.0901233	0.796387	0.490397	0.0983931	CENTER
AKAP4_213	sp|Q60662|AKAP4_MOUSE	Q60662	213	0.999	SPSNQRSVATPEGECSMDDLSFYVNRLSSLV	S	M	D	D	8	5	3	0.177897	-0.339234	0.235706	0.0706815	-0.180312	0.0666368	-0.216974	0.0832562	STYX	-0.00705237	0.781479	-0.0223603	0.961449	CENTER
AKAP4_225 226	sp|Q60662|AKAP4_MOUSE	Q60662	225 226	0.898	GECSMDDLSFYVNRLSSLVIQMARKEIKDKL ECSMDDLSFYVNRLSSLVIQMARKEIKDKLE	S	S	L	V	8	5	3	-0.191514	-0.685744	0.662588	0.119204	-0.414066	1.13527	0.713381	0.968054	STYX	-0.101906	0.26343	0.938901	0.0135195	NR
AKAP4_271	sp|Q60662|AKAP4_MOUSE	Q60662	271	1	DKGKTSPRSAVSKIASEMAHEAVELTSSEMR	S	E	M	A	8	5	3	0.307122	-0.422179	0.475253	0.18767	-0.723376	0.862549	0.205525	0.72737	STYX	-0.0351022	0.875856	0.598481	0.0699955	CENTER
AKAP4_29 30	sp|Q60662|AKAP4_MOUSE	Q60662	29 30	0.866	IDWLHSRRGVCKVDLYSPKGQQDQDRKVICF DWLHSRRGVCKVDLYSPKGQQDQDRKVICFV	Y	S	P	K	6	4	2	NA	-0.597707	0.321705	-0.0160535	-0.195077	NA	1.17765	1.33823	STYX	-0.121783	0.285367	1.25794	0.0231378	NR
AKAP4_30	sp|Q60662|AKAP4_MOUSE	Q60662	30	0.989	DWLHSRRGVCKVDLYSPKGQQDQDRKVICFV	S	P	K	G	8	5	3	0.334762	-0.741123	0.153428	-0.145128	-0.242396	1.60183	1.68059	2.04597	STYX	-0.128091	0.307611	1.77613	0.00332739	NR
AKAP4_341	sp|Q60662|AKAP4_MOUSE	Q60662	341	0.999	DSISKGLMVYANQVASDMMVSVMKTLKVHSC	S	D	M	M	7	4	3	0.595013	-0.702926	NA	-0.430518	-0.432111	0.70176	0.0378496	0.970334	STYX	-0.242636	0.0846341	0.569981	0.104416	CENTER
AKAP4_442	sp|Q60662|AKAP4_MOUSE	Q60662	442	0.996	KRLVSALLGEKKETKSQSLAYATLKAGTNDP	S	Q	S	L	8	5	3	0.230695	-0.914369	0.916378	-0.305299	-0.218231	1.12397	1.00915	1.29552	STYQ	-0.0581652	0.38256	1.14288	0.00707682	NR
AKAP4_444	sp|Q60662|AKAP4_MOUSE	Q60662	444	0.997	LVSALLGEKKETKSQSLAYATLKAGTNDPKC	S	L	A	Y	8	5	3	-0.0466765	-1.36413	1.04661	-0.382566	-0.125022	2.01361	1.22111	1.83728	STYX	-0.174358	0.128944	1.69067	0.0038784	NR
AKAP4_463	sp|Q60662|AKAP4_MOUSE	Q60662	463	0.999	ATLKAGTNDPKCKNQSLEFSAMKAEMKGKDK	S	L	E	F	8	5	3	0.0790724	-0.961503	1.86779	-0.0358188	-0.138401	1.21075	0.826483	1.39715	STYX	0.162228	0.550101	1.14479	0.00787833	NR
AKAP4_489	sp|Q60662|AKAP4_MOUSE	Q60662	489	0.994	KGKDKCKSKADPCCKSLTSAERVSEHILKES	S	L	T	S	8	5	3	-0.717785	-1.02811	2.03564	-0.18197	-0.181659	1.04426	1.09729	1.12743	STYX	-0.0147776	0.0504971	1.08966	0.00776655	NR
AKAP4_497	sp|Q60662|AKAP4_MOUSE	Q60662	497	1	KADPCCKSLTSAERVSEHILKESLTMWNNQK	S	E	H	I	8	5	3	0.257011	-0.919988	0.831524	-0.143906	-0.376671	1.3673	0.84127	0.994103	STYX	-0.070406	0.440601	1.06756	0.00939125	NR
AKAP4_536	sp|Q60662|AKAP4_MOUSE	Q60662	536	0.979	NKVCCTSKDEKREKISPSTDSLAKDLIVSAL	S	P	S	T	6	3	3	-0.0641393	-0.441976	1.27007	NA	NA	2.10557	1.70221	1.95551	STYX	0.254651	0.680129	1.9211	0.00317437	NR
AKAP4_538 539	sp|Q60662|AKAP4_MOUSE	Q60662	538 539	0.899	VCCTSKDEKREKISPSTDSLAKDLIVSALML CCTSKDEKREKISPSTDSLAKDLIVSALMLI	S	T	D	S	8	5	3	0.10892	-0.76772	1.40624	0.466467	-0.696466	1.0395	0.923437	1.50115	STYX	0.103488	0.88787	1.1547	0.007702	NR
AKAP4_539	sp|Q60662|AKAP4_MOUSE	Q60662	539	0.985	CCTSKDEKREKISPSTDSLAKDLIVSALMLI	T	D	S	L	6	3	3	NA	-1.33994	0.707568	0.296257	NA	1.03932	1.36299	0.759674	STYX	-0.112037	0.507166	1.054	0.0102191	NR
AKAP4_541	sp|Q60662|AKAP4_MOUSE	Q60662	541	0.998	TSKDEKREKISPSTDSLAKDLIVSALMLIQY	S	L	A	K	7	4	3	-0.0410784	-0.776738	1.25338	NA	-0.506212	1.14625	0.759081	1.0044	STYX	-0.0176619	0.257186	0.969911	0.0119402	NR
AKAP4_575 576	sp|Q60662|AKAP4_MOUSE	Q60662	575 576	0.887	QQAKGKDPCEEECPGSSMGYMSQSAQYEKCG QAKGKDPCEEECPGSSMGYMSQSAQYEKCGG	S	S	M	G	7	5	2	-0.563549	-0.181008	0.694118	0.697267	0.0703808	0.629607	NA	0.756023	STYX	0.143442	0.817559	0.692815	0.0827715	CENTER
AKAP4_583	sp|Q60662|AKAP4_MOUSE	Q60662	583	0.998	CEEECPGSSMGYMSQSAQYEKCGGGQSSKSL	S	A	Q	Y	6	4	2	-0.805694	0.0181315	0.974694	NA	0.0793142	NA	0.849642	0.889397	STYX	0.0666113	0.911536	0.869519	0.0482977	NR
AKAP4_63	sp|Q60662|AKAP4_MOUSE	Q60662	63	0.956	STLNVEDKDSKGAAGSRSEGELNLETLEEKE	S	R	S	E	7	4	3	NA	-0.464038	0.469844	-0.233734	-0.55996	0.201909	0.868932	1.00855	STYX	-0.196972	0.0963972	0.693132	0.0522459	CENTER
AKAP4_65	sp|Q60662|AKAP4_MOUSE	Q60662	65	0.999	LNVEDKDSKGAAGSRSEGELNLETLEEKEII	S	E	G	E	8	5	3	-0.0909282	-0.441741	1.00824	-0.308825	-0.550551	1.50046	0.641706	1.19542	STYX	-0.0767616	0.0621949	1.11253	0.0106406	NR
AKAP4_732	sp|Q60662|AKAP4_MOUSE	Q60662	732	0.995	GAALAELEEQAALVGSGSRCGRDAMMSQNYS	S	G	S	R	8	5	3	0.097014	-0.333831	0.871223	0.449003	-0.435318	0.240807	-0.423226	0.173038	STYX	0.129618	0.873653	-0.00312717	0.968163	CENTER
AKAP4_734	sp|Q60662|AKAP4_MOUSE	Q60662	734	0.99	ALAELEEQAALVGSGSRCGRDAMMSQNYSET	S	R	C	G	6	3	3	0.190088	0.237456	NA	NA	0.013454	0.325672	0.791502	0.455865	STYX	0.146999	0.267183	0.524346	0.0879004	CENTER
AKAP4_743	sp|Q60662|AKAP4_MOUSE	Q60662	743	0.993	ALVGSGSRCGRDAMMSQNYSETPGPEVIVNN	S	Q	N	Y	8	5	3	-0.773474	-0.273966	0.540588	0.634452	-0.287484	0.416424	0.527105	0.241922	STYQ	-0.0319767	0.464149	0.39515	0.161718	CENTER
AKAP4_749	sp|Q60662|AKAP4_MOUSE	Q60662	749	0.978	SRCGRDAMMSQNYSETPGPEVIVNNQCSTTN	T	P	G	P	5	2	3	-0.335324	-0.245385	NA	NA	NA	0.324729	-0.148338	0.147172	STYX	-0.290354	0.030011	0.107854	0.668506	CENTER
AKAP4_761	sp|Q60662|AKAP4_MOUSE	Q60662	761	0.997	YSETPGPEVIVNNQCSTTNLQKQLQAVLQWI	S	T	T	N	8	5	3	-0.425307	-0.256811	1.42925	0.454854	-0.377758	0.959084	0.572983	0.175242	STYX	0.164845	0.475924	0.569103	0.0874042	CENTER
AKAP4_761 762 763	sp|Q60662|AKAP4_MOUSE	Q60662	761 762 763	0.899	YSETPGPEVIVNNQCSTTNLQKQLQAVLQWI SETPGPEVIVNNQCSTTNLQKQLQAVLQWIA ETPGPEVIVNNQCSTTNLQKQLQAVLQWIAA	S	T	T	N	8	5	3	-0.776045	-0.342456	4.00218	0.567475	-0.138259	0.375711	-0.0578632	0.0889119	STYX	0.662579	0.593829	0.135587	0.600883	CENTER
AKAP4_811 812	sp|Q60662|AKAP4_MOUSE	Q60662	811 812	0.897	LEKLPEVSAKAAEKGYSVGDLLQEVMKFAKE EKLPEVSAKAAEKGYSVGDLLQEVMKFAKER	Y	S	V	G	8	5	3	0.12352	-0.617843	1.04666	0.0863404	-0.674679	1.15067	0.245544	0.482409	STYX	-0.00720047	0.756629	0.626207	0.0753416	CENTER
AKAP4_812	sp|Q60662|AKAP4_MOUSE	Q60662	812	0.996	EKLPEVSAKAAEKGYSVGDLLQEVMKFAKER	S	V	G	D	7	4	3	0.052906	-1.20869	2.06116	NA	-0.344823	1.41423	0.912078	0.805417	STYX	0.140138	0.473497	1.04391	0.0106406	NR
AKAP4_96	sp|Q60662|AKAP4_MOUSE	Q60662	96	0.998	VIKDTEKQDQSKTEGSVCLFKQAPSDPISVL	S	V	C	L	8	5	3	-0.00473687	-0.868419	1.26495	0.178525	-0.540694	1.28923	0.763492	0.441269	STYX	0.00592521	0.623836	0.831329	0.0276866	CENTER
AKAP8_336	sp|Q9DBR0|AKAP8_MOUSE	Q9DBR0	336	0.995	DGDLSENDDGAGDLRSGDEEFRGEDDLCDSR	S	G	D	E	5	2	3	0.00347879	0.29679	NA	NA	NA	-0.205226	-0.0170139	0.27564	STYX	0.150134	0.460913	0.0178	0.938452	CENTER
AKAP8_72	sp|Q9DBR0|AKAP8_MOUSE	Q9DBR0	72	0.999	SWEATKTNDGGLAAGSPAMHVASFAPEPCTD	S	P	A	M	6	3	3	0.532278	0.388547	0.635038	NA	NA	-0.0319509	-0.0787193	-0.232683	STYX	0.518621	0.00878429	-0.114451	0.674845	CENTER
AKIB1_738	sp|Q6ZPS6|AKIB1_MOUSE	Q6ZPS6	738	1	QEFLASVARGVAPADSPDAPRRSFAGGTWDW	S	P	D	A	8	5	3	0.130014	-0.100117	0.0203974	-0.0924766	0.177895	-0.548806	-0.288558	-0.425804	STYX	0.0271426	0.846643	-0.421056	0.131002	CENTER
AKIB1_827	sp|Q6ZPS6|AKIB1_MOUSE	Q6ZPS6	827	0.987	SASMSVLHSSSLRDYSPASRSANQDSLQALS	S	P	A	S	5	2	3	0.257115	-0.879478	NA	NA	NA	-0.588719	-0.279052	-0.590982	STYX	-0.311181	0.695566	-0.486251	0.0930411	CENTER
AKIR1_22	sp|Q99LF1|AKIR1_MOUSE	Q99LF1	22	0.998	LKRPMEFEAALLSPGSPKRRRCAPLPGPTPG	S	P	K	R	8	5	3	0.934505	0.126652	-0.0919635	0.152026	-0.341716	-0.0044677	-0.409054	0.0119466	STYX	0.155901	0.800866	-0.133858	0.637365	CENTER
AKIR2_18	sp|B1AXD8|AKIR2_MOUSE,sp|Q7TQH0|ATX2L_MOUSE	B1AXD8	18	0.999	CGATLKRTLDFDPLLSPASPKRRRCAPLSAP	S	P	A	S	8	5	3	0.166646	-0.30185	-0.166412	0.10876	-0.12941	0.441968	0.0698754	0.948125	STYX	-0.0644533	0.249287	0.486656	0.143222	CENTER
AKIR2_21	sp|B1AXD8|AKIR2_MOUSE	B1AXD8	21	0.999	TLKRTLDFDPLLSPASPKRRRCAPLSAPASA	S	P	K	R	8	5	3	1.31469	-0.0532922	-0.208727	0.0706559	-0.190556	0.622131	0.553647	0.618452	STYX	0.186554	0.521724	0.598077	0.0533583	CENTER
AKIR2_55	sp|B1AXD8|AKIR2_MOUSE	B1AXD8	55	0.999	PAAATAAAAASAAAASPQKYLRMEPSPFGDV	S	P	Q	K	8	5	3	0.512169	0.0581403	0.150965	0.406883	0.138049	0.145764	0.0319815	0.156083	STYX	0.253241	0.0372034	0.111276	0.632694	CENTER
AKNA_1274	sp|Q80VW7|AKNA_MOUSE	Q80VW7	1274	0.994	SSSGPSEKNTPKKPSTPILKRKNRQTGSPVR	T	P	I	L	5	3	2	NA	-0.391533	NA	0.224075	-0.185211	NA	0.269706	0.369245	STYX	-0.117556	0.270366	0.319476	0.328118	CENTER
AKP13_1342	sp|E9Q394|AKP13_MOUSE	E9Q394	1342	0.999	ISAASEEEAVGNGAATPKMKQGPGTQAINRE	T	P	K	M	5	3	2	NA	-0.202061	NA	0.25546	-0.067797	-0.362564	-1.15822	NA	STYX	-0.00479915	0.564381	-0.760392	0.0888336	CENTER
AKP13_1532	sp|E9Q394|AKP13_MOUSE	E9Q394	1532	1	FLRSSMRSLSPFRRHSWGPGKNAASDAEMNQ	S	W	G	P	8	5	3	0.014348	-0.25243	0.308027	0.0361785	0.248839	-0.830119	-0.346119	-0.419249	STYX	0.0709924	0.70124	-0.531829	0.0775174	CENTER
AKP13_1569	sp|E9Q394|AKP13_MOUSE	E9Q394	1569	0.999	LGHVVRRPPIHRRSFSLEGLTGGGVGNKPSS	S	L	E	G	5	2	3	0.00976084	0.354094	NA	NA	NA	-0.385822	-0.83366	-0.464644	STYX	0.181927	0.399428	-0.561375	0.0633683	CENTER
AKP13_1613	sp|E9Q394|AKP13_MOUSE	E9Q394	1613	0.998	NPFGGEEQRNSLMSLSEEHLEPDQRQHHRMF	S	E	E	H	8	5	3	0.16137	0.136187	0.177193	-0.0350898	-0.0980168	-0.832306	-0.707781	-0.730364	STYX	0.0683287	0.679487	-0.756817	0.0192173	CENTER
AKP13_1839	sp|E9Q394|AKP13_MOUSE	E9Q394	1839	0.999	VIMRNKSSQPKERPRSAVLLADEATAAPMFT	S	A	V	L	8	5	3	0.377842	-0.249195	0.26856	0.145156	-0.0302191	0.0291229	-0.343276	-0.399538	STYX	0.102429	0.541015	-0.237897	0.384098	CENTER
AKP13_2462	sp|E9Q394|AKP13_MOUSE	E9Q394	2462	0.997	EKEEGDDGQDLRRTESDSGLKKGGNGNLVFM	S	D	S	G	5	2	3	-0.216177	1.55391	NA	NA	NA	0.0216361	0.45293	-0.805221	STYX	0.668867	0.842348	-0.110218	0.80986	CENTER
AKP13_2527	sp|E9Q394|AKP13_MOUSE	E9Q394	2527	0.953	DQKLVLTEKVLTRSASRPSSLIEQEKQRSLE	S	R	P	S	6	4	2	-0.342802	-0.555906	0.415039	0.158106	NA	NA	-1.26705	-1.2187	STYX	-0.0813908	0.601803	-1.24288	0.0197487	NR
AKP13_2684	sp|E9Q394|AKP13_MOUSE	E9Q394	2684	0.99	DEFSSPSAPSVTKSGSLDSELSVSPKRNSIS	S	L	D	S	7	4	3	NA	-0.53598	0.252457	0.109456	-0.11546	-0.419197	-1.01318	-0.844873	STYX	-0.0723816	0.600755	-0.759084	0.0253828	CENTER
AKP13_2692	sp|E9Q394|AKP13_MOUSE	E9Q394	2692	0.999	PSVTKSGSLDSELSVSPKRNSISRTQKDKGP	S	P	K	R	8	5	3	-0.031436	0.287002	0.0920145	0.0420978	0.0956073	-0.865812	-1.02983	-1.04879	STYX	0.0970571	0.433514	-0.981477	0.00805507	NR
AKP13_809	sp|E9Q394|AKP13_MOUSE	E9Q394	809	0.998	DALSLVPSQKEKGTATPQLHRTTACRDGPDG	T	P	Q	L	8	5	3	-0.274029	-0.393513	0.123206	0.0545722	-0.129241	-0.343885	-0.257587	-0.21477	STYX	-0.123801	0.120851	-0.272081	0.303881	CENTER
AKT1_124	sp|P31750|AKT1_MOUSE	P31750	124	0.994	GLKRQEEETMDFRSGSPSDNSGAEEMEVSLA	S	P	S	D	8	5	3	-0.124563	0.583526	-0.0485918	-0.0107346	0.0455008	-0.384112	-0.451515	-0.545237	STYX	0.0890276	0.871124	-0.460288	0.0997619	CENTER
AKT1_126	sp|P31750|AKT1_MOUSE	P31750	126	0.864	KRQEEETMDFRSGSPSDNSGAEEMEVSLAKP	S	D	N	S	4	2	2	-0.0210297	NA	0.169749	NA	NA	-0.28513	NA	-0.887611	STYX	0.0743596	0.746554	-0.58637	0.138783	CENTER
AKT1_129	sp|P31750|AKT1_MOUSE	P31750	129	0.999	EEETMDFRSGSPSDNSGAEEMEVSLAKPKHR	S	G	A	E	8	5	3	0.111268	0.569403	-0.0393095	0.000100171	-0.270811	-0.39025	-0.497956	-0.500836	STYX	0.0741301	0.935577	-0.463014	0.098094	CENTER
AKT2_126	sp|Q60823|AKT2_MOUSE	Q60823	126	0.997	KQRGPGEDAMDYKCGSPSDSSTSEMMEVAVN	S	P	S	D	8	5	3	-0.561016	0.596767	0.323134	0.581994	0.16667	-0.452805	-0.579737	-0.76931	STYX	0.22151	0.107051	-0.600617	0.0465572	CENTER
AKT2_451	sp|Q60823|AKT2_MOUSE	Q60823	451	0.996	TRYFDDEFTAQSITITPPDRYDSLDPLELDQ	T	P	P	D	5	3	2	0.564585	0.199733	NA	-0.695579	NA	NA	-0.760043	0.0154588	STYX	0.0229129	0.631362	-0.372292	0.355639	CENTER
AKTIP_29 30	sp|Q64362|AKTIP_MOUSE	Q64362	29 30	0.89	KRAEGEEKTLAGDVKTSPPRSAPKKQLPSIP RAEGEEKTLAGDVKTSPPRSAPKKQLPSIPK	T	S	P	P	7	5	2	0.20149	-0.0656238	-0.193456	-0.285109	-0.322398	0.254412	NA	-0.255883	STYX	-0.133019	0.0571738	-0.0007354	0.992356	CENTER
AKTIP_30	sp|Q64362|AKTIP_MOUSE	Q64362	30	0.986	RAEGEEKTLAGDVKTSPPRSAPKKQLPSIPK	S	P	P	R	7	4	3	0.192014	-0.213868	-0.25464	NA	-0.412903	0.291521	-0.114107	-0.478454	STYX	-0.172349	0.0710386	-0.100347	0.736512	CENTER
AKTS1_203 204	sp|Q9D1F4|AKTS1_MOUSE	Q9D1F4	203 204	0.895	SVPVWAFKEKRTEARSSDEENGPPSSPDLDR VPVWAFKEKRTEARSSDEENGPPSSPDLDRI	S	S	D	E	5	3	2	NA	NA	0.0126156	0.0927501	0.0900311	-0.106849	-0.130963	NA	STYX	0.0651323	0.667728	-0.118906	0.721027	CENTER
AKTS1_212 213	sp|Q9D1F4|AKTS1_MOUSE	Q9D1F4	212 213	0.898	KRTEARSSDEENGPPSSPDLDRIAASMRALV RTEARSSDEENGPPSSPDLDRIAASMRALVL	S	S	P	D	8	5	3	-0.467821	-0.492392	0.098212	0.434545	-0.0245154	-0.560861	-0.165968	-0.419043	STYX	-0.0903943	0.411061	-0.381957	0.174251	CENTER
AKTS1_213	sp|Q9D1F4|AKTS1_MOUSE	Q9D1F4	213	0.993	RTEARSSDEENGPPSSPDLDRIAASMRALVL	S	P	D	L	6	3	3	-0.320908	-0.0906375	NA	-0.0402519	NA	-0.345275	-0.483226	-0.368536	STYX	-0.150599	0.0776073	-0.399012	0.142857	CENTER
AKTS1_247 248	sp|Q9D1F4|AKTS1_MOUSE	Q9D1F4	247 248	0.898	EDTQVFGDLPRPRLNTSDFQKLKRKY_____ DTQVFGDLPRPRLNTSDFQKLKRKY______	T	S	D	F	8	5	3	-0.86095	-0.716964	0.580574	0.922124	0.51874	-1.38422	-2.22327	-1.06928	STYX	0.0887049	0.549687	-1.55892	0.00391316	NR
AL1A2_351	sp|Q62148|AL1A2_MOUSE	Q62148	351	0.998	FVKRSVERAKRRIVGSPFDPTTEQGPQIDKK	S	P	F	D	8	5	3	0.367258	0.0543569	-0.0286464	-0.0906242	-0.00314065	0.579541	0.617988	0.684053	STYX	0.0598407	0.966751	0.627194	0.0464249	CENTER
AL2CL_636	sp|Q60I26|AL2CL_MOUSE	Q60I26	636	1	ALLGFHTQSSRELRKSQECLCCERSHPEDCV	S	Q	E	C	7	5	2	-0.0370323	-0.193744	-0.229782	-0.0606461	0.270406	-0.628293	NA	-1.12584	STYQ	-0.0501598	0.199461	-0.877067	0.0471017	NR
AL2SB_85	sp|Q8BVM7|AL2SB_MOUSE	Q8BVM7	85	0.998	GNTESSKAPSEVIQVSPGYTLIRNREQISVT	S	P	G	Y	5	3	2	0.32164	-0.499581	NA	NA	0.390496	0.0738129	-0.0463641	NA	STYX	0.0708519	0.551978	0.0137244	0.941059	CENTER
AL3A2_293	sp|P47740|AL3A2_MOUSE,sp|Q6PCN7|HLTF_MOUSE,sp|Q8BP92|RCN2_MOUSE	P47740	293	1	DYERIINLRHFKRLQSLLKGQKIAFGGEMDE	S	L	L	K	6	4	2	0.0165633	0.138362	NA	-0.305518	-0.675381	NA	-1.30714	-1.03069	STYX	-0.206493	0.18252	-1.16891	0.0224434	NR
AL4A1_43	sp|Q8CHT0|AL4A1_MOUSE	Q8CHT0	43	0.996	SLKVTNEPILAFSQGSPERDALQKALKDLKG	S	P	E	R	7	4	3	NA	0.145065	-0.117723	-0.0506214	-0.310345	-0.347854	-0.221583	-0.44293	STYX	-0.0834062	0.205888	-0.337456	0.209656	CENTER
AL7A1_520	sp|Q9DBF1|AL7A1_MOUSE	Q9DBF1	520	0.995	GRESGSDAWKQYMRRSTCTINYSTSLPLAQG	S	T	C	T	4	2	2	NA	-0.0948501	-0.385333	NA	NA	-0.239382	NA	-0.557136	STYX	-0.240092	0.0683386	-0.398259	0.249661	CENTER
ALAT2_26	sp|Q8BGT5|ALAT2_MOUSE	Q8BGT5	26	0.999	GSCPRASGPWGRSHSSAAAEASAALKVRPER	S	A	A	A	7	4	3	0.260932	-0.0612853	-0.126168	NA	0.0121268	-0.761021	-1.00142	-0.789287	STYX	0.0214014	0.686857	-0.850576	0.013264	NR
ALDOC_39	sp|P05063|ALDOC_MOUSE	P05063	39	0.999	VTPGKGILAADESVGSMAKRLSQIGVENTEE	S	M	A	K	4	2	2	NA	-0.181113	NA	-0.0629147	NA	NA	-0.551168	-0.524394	STYX	-0.122014	0.144777	-0.537781	0.12819	CENTER
ALKB1_378	sp|P0CB42|ALKB1_MOUSE	P0CB42	378	1	RDIAADGLCHLHDPNSPVKRKRLNPNS____	S	P	V	K	6	4	2	NA	0.239378	-0.0392902	-0.0933689	-0.0142767	0.241821	NA	0.107116	STYX	0.0231105	0.717944	0.174468	0.564258	CENTER
ALKB3_28	sp|Q8K1E6|ALKB3_MOUSE	Q8K1E6	28	0.999	GWATPTKSQSATQPASPARSRLSQTAGPAWR	S	P	A	R	8	5	3	-0.360443	-0.205605	0.0527616	0.433032	0.224445	0.339007	0.494216	0.0433932	STYX	0.0288382	0.88967	0.292205	0.291905	CENTER
ALKB5_362	sp|Q3TSG4|ALKB5_MOUSE	Q3TSG4	362	0.994	ENRRSVLLPTHRRRGSFSSENYWRKSYESSE	S	F	S	S	7	4	3	-0.0629365	-0.198844	-0.0439649	NA	-0.186014	-0.138708	-0.463081	-0.0328249	STYX	-0.12294	0.0430579	-0.211538	0.44586	CENTER
ALKB5_384	sp|Q3TSG4|ALKB5_MOUSE	Q3TSG4	384	0.994	WRKSYESSEDCPEAASSPTRKVKMRRH____	S	S	P	T	5	2	3	NA	NA	-0.600157	-0.321549	NA	0.00762942	0.466528	-0.116216	STYX	-0.460853	0.0203966	0.119314	0.674943	CENTER
ALKB5_384 385	sp|Q3TSG4|ALKB5_MOUSE	Q3TSG4	384 385	0.897	WRKSYESSEDCPEAASSPTRKVKMRRH____ RKSYESSEDCPEAASSPTRKVKMRRH_____	S	S	P	T	8	5	3	-0.00337559	0.0178714	-0.256263	-0.197462	0.515899	0.0890763	0.365997	-0.133575	STYX	0.0153337	0.445094	0.107166	0.679247	CENTER
ALKB5_385	sp|Q3TSG4|ALKB5_MOUSE	Q3TSG4	385	0.994	RKSYESSEDCPEAASSPTRKVKMRRH_____	S	P	T	R	8	5	3	0.16455	-0.088688	-0.159559	-0.331848	0.332815	0.0617979	0.41818	-0.120747	STYX	-0.0165461	0.473684	0.119744	0.656963	CENTER
ALMS1_117 118	sp|Q8K4E0|ALMS1_MOUSE	Q8K4E0	117 118	0.882	PTPPPPPPPLSPRLRYTPVEHLGKTEVVPLT TPPPPPPPLSPRLRYTPVEHLGKTEVVPLTC	Y	T	P	V	4	2	2	NA	-0.403346	NA	-0.264649	NA	-0.261745	NA	0.319878	STYX	-0.333998	0.0258096	0.0290665	0.928557	CENTER
ALMS1_118	sp|Q8K4E0|ALMS1_MOUSE	Q8K4E0	118	0.992	TPPPPPPPLSPRLRYTPVEHLGKTEVVPLTC	T	P	V	E	5	2	3	0.373038	-0.429986	NA	NA	NA	-0.446739	-0.250811	0.130951	STYX	-0.0284742	0.84645	-0.188866	0.502383	CENTER
ALS2_1329	sp|Q920R0|ALS2_MOUSE	Q920R0	1329	0.997	NIAVALTTNRRQHKDSPEILSRSQTQTLESL	S	P	E	I	8	5	3	0.153729	0.182547	-0.222056	0.15736	0.021772	0.0295128	-0.0927874	-0.20739	STYX	0.0586703	0.655977	-0.0902215	0.744491	CENTER
ALS2_458 459 460	sp|Q920R0|ALS2_MOUSE	Q920R0	458 459 460	0.899	LREEQVKQESLQGKKSSSLMDIREEELEGGS REEQVKQESLQGKKSSSLMDIREEELEGGSR EEQVKQESLQGKKSSSLMDIREEELEGGSRR	S	S	S	L	7	5	2	0.477557	-0.0621809	0.154605	0.140423	-0.0934133	-0.283403	NA	0.0612923	STYX	0.123398	0.5461	-0.111055	0.747918	CENTER
ALS2_460	sp|Q920R0|ALS2_MOUSE	Q920R0	460	0.993	EEQVKQESLQGKKSSSLMDIREEELEGGSRR	S	L	M	D	6	3	3	0.51971	-0.0257956	NA	NA	0.534176	-0.434319	-0.313344	0.188965	STYX	0.342697	0.128463	-0.186233	0.508108	CENTER
ALS2_477	sp|Q920R0|ALS2_MOUSE	Q920R0	477	0.999	MDIREEELEGGSRRLSLPGLLSQVSPRLLRK	S	L	P	G	5	2	3	0.335876	-0.00490337	NA	NA	NA	0.126046	0.0129289	-0.117845	STYX	0.165486	0.460117	0.00704352	0.949732	CENTER
ALS2_486	sp|Q920R0|ALS2_MOUSE	Q920R0	486	0.999	GGSRRLSLPGLLSQVSPRLLRKAARVKTRTV	S	P	R	L	8	5	3	0.402398	-0.3678	-0.268397	-0.0585201	-0.300086	0.391173	0.0243042	-0.11717	STYX	-0.118481	0.07605	0.0994356	0.710658	CENTER
ALS2_504	sp|Q920R0|ALS2_MOUSE	Q920R0	504	0.996	LLRKAARVKTRTVVLTPTYSGEADALLPSLR	T	P	T	Y	5	2	3	0.366627	-0.29616	NA	NA	NA	0.272288	0.184797	0.869335	STYX	0.0352333	0.899201	0.44214	0.158535	CENTER
AMACR_323	sp|O09174|AMACR_MOUSE	O09174	323	0.999	NRERASFITDGEQLPSPRPAPLLSRTPAVPS	S	P	R	P	7	5	2	0.511965	0.0827476	-0.0505375	0.0114854	-0.168031	NA	-0.658617	-0.69457	STYX	0.077526	0.943239	-0.676594	0.0740591	CENTER
AMD_925	sp|P97467|AMD_MOUSE	P97467	925	0.993	SSSGRVLGRLRGKGSSGLNLGNFFASRKGYS	S	G	L	N	6	3	3	0.363253	0.0193913	-0.234589	NA	NA	-0.94136	-0.697269	-0.604119	STYX	0.049352	0.917946	-0.747583	0.022219	CENTER
AMER1_871 872	sp|Q7TS75|AMER1_MOUSE	Q7TS75	871 872	0.897	NSYHSRFYQGLPWGVSSLPRYLGLPGVHPRP SYHSRFYQGLPWGVSSLPRYLGLPGVHPRPP	S	S	L	P	5	2	3	0.264955	-0.338361	NA	NA	NA	-0.175684	-1.00851	-0.23179	STYX	-0.0367029	0.771735	-0.471994	0.158693	CENTER
AMER2_227	sp|Q8CCJ4|AMER2_MOUSE	Q8CCJ4	227	0.994	AAGPGNLVLPGSLTASLECVKEEPPRAARRP	S	L	E	C	5	3	2	-0.174051	0.270755	0.232413	NA	NA	NA	0.228643	0.611673	STYX	0.109705	0.565375	0.420158	0.240617	CENTER
AMERL_74	sp|Q8JZZ6|AMERL_MOUSE	Q8JZZ6	74	0.997	SGRENVSDLTLGPGNSPITRMNTASGALSPL	S	P	I	T	7	4	3	-0.155617	-0.0210053	0.118549	-0.0440848	NA	-0.32919	-0.26615	0.143303	STYX	-0.0255397	0.41468	-0.150679	0.586264	CENTER
AMHR2_185	sp|Q8K592|AMHR2_MOUSE	Q8K592	185	0.997	RKACRVQGGSDPEPGSGGDCSEELPELAELR	S	G	G	D	7	4	3	0.187708	0.161804	3.52171	0.651275	NA	0.361942	-0.286079	-0.170294	STYX	1.13062	0.0109454	-0.031477	0.895802	NR
AMOL1_253	sp|Q9D4H4|AMOL1_MOUSE	Q9D4H4	253	1	QKSRTEGRPTVNRANSGQAHKDEALKELKQG	S	G	Q	A	5	3	2	-0.756241	-0.616238	NA	0.00621277	NA	0.663605	0.00802545	NA	STYX	-0.455422	0.0373886	0.335815	0.38529	CENTER
AMOL1_281	sp|Q9D4H4|AMOL1_MOUSE	Q9D4H4	281	1	KQGHVRSLSERIMQLSLERNGAKQHLPSSGN	S	L	E	R	4	2	2	1.42313	-1.13963	NA	NA	NA	-0.113649	NA	0.418282	STYX	0.141749	0.98713	0.152317	0.660566	CENTER
AMOL1_804	sp|Q9D4H4|AMOL1_MOUSE	Q9D4H4	804	0.998	KDAGKTDSASLRPARSVPSIAAATGTHSRQT	S	V	P	S	6	3	3	0.145025	-0.159968	-0.164062	NA	NA	0.215242	-0.156002	0.0655271	STYX	-0.0596683	0.301873	0.0415889	0.844964	CENTER
AMOL1_820	sp|Q9D4H4|AMOL1_MOUSE	Q9D4H4	820	0.995	VPSIAAATGTHSRQTSLTSSQLTEEKKEEKT	S	L	T	S	6	3	3	0.0326053	-0.356891	-0.256009	NA	NA	-0.0340891	0.172641	0.757871	STYX	-0.193431	0.0741424	0.298808	0.341199	CENTER
AMOL1_840	sp|Q9D4H4|AMOL1_MOUSE	Q9D4H4	840	1	QLTEEKKEEKTTWKGSIGFLLGKEHQGQASA	S	I	G	F	5	2	3	0.285481	-1.44076	NA	NA	NA	-0.214666	-0.762401	0.425123	STYX	-0.57764	0.727412	-0.183981	0.578652	CENTER
AMOL1_918	sp|Q9D4H4|AMOL1_MOUSE	Q9D4H4	918	0.998	ASLPSRGRLSTAPSNSPILKHPAAKGAVEKQ	S	P	I	L	5	3	2	0.409824	-0.635393	-0.172174	NA	NA	0.715761	0.32867	NA	STYX	-0.132581	0.366458	0.522215	0.164547	CENTER
AMOT_311	sp|Q8VHG2|AMOT_MOUSE	Q8VHG2	311	0.99	DISSLSLSARNSQPHSPTSSLTAGASSLPLL	S	P	T	S	4	2	2	-0.261393	0.487909	NA	NA	NA	NA	-0.22235	0.0564294	STYX	0.113258	0.995231	-0.0829604	0.810969	CENTER
AMOT_693	sp|Q8VHG2|AMOT_MOUSE	Q8VHG2	693	0.998	AATVAAQRDTTVISHSPNTSYDTALEARIQK	S	P	N	T	6	4	2	-0.147486	0.158453	-0.071911	NA	0.0459013	NA	-0.365994	-0.798589	STYX	-0.00376051	0.589684	-0.582292	0.122578	CENTER
AMPD2_12	sp|Q9DBT5|AMPD2_MOUSE	Q9DBT5	12	0.999	____MASEARSGLGASPLQSARSLPGNAPCL	S	P	L	Q	8	5	3	0.443542	-0.352569	-0.0497245	0.0516199	0.0444321	-0.0533842	0.483068	-0.145757	STYX	0.0274599	0.825615	0.0946422	0.75473	CENTER
AMPD2_87	sp|Q9DBT5|AMPD2_MOUSE	Q9DBT5	87	1	IEQLEERRQRLERQISQDVKLEPDILLRAKQ	S	Q	D	V	8	5	3	0.195685	-0.407171	0.0131702	0.171494	-0.0165782	-0.751284	-0.730109	-0.952609	STYQ	-0.00868004	0.887542	-0.811334	0.0155987	CENTER
AMRA1_1204 1205 1206	sp|A2AH22|AMRA1_MOUSE	A2AH22	1204 1205 1206	0.87	IHRSSQTGTESGAARTSSPQPSTSRGLPSEP HRSSQTGTESGAARTSSPQPSTSRGLPSEPG RSSQTGTESGAARTSSPQPSTSRGLPSEPGQ	T	S	S	P	6	4	2	NA	0.934311	0.0531766	0.741579	3.6154	0.295548	NA	-0.00245417	STYX	1.33612	0.00923737	0.146547	0.640169	NR
AMRA1_1206	sp|A2AH22|AMRA1_MOUSE	A2AH22	1206	0.992	RSSQTGTESGAARTSSPQPSTSRGLPSEPGQ	S	P	Q	P	5	2	3	-0.396703	0.923865	NA	NA	NA	0.489809	0.679947	-0.202252	STYX	0.263581	0.984387	0.322501	0.316244	CENTER
AMRP_53	sp|P55302|AMRP_MOUSE	P55302	53	1	YSREKNEPEMAAKRESGEEFRMEKLNQLWEK	S	G	E	E	5	2	3	0.453723	0.121948	NA	NA	NA	-0.594293	-0.773003	-0.191379	STYX	0.287835	0.136526	-0.519558	0.0886241	CENTER
AN13D_552	sp|Q6PD24|AN13D_MOUSE	Q6PD24	552	0.998	LQESLQLSTESRGPESPQKTPPSPAPPSFEE	S	P	Q	K	5	2	3	NA	0.254885	0.0248064	NA	NA	0.0565472	0.0825201	-0.0160932	STYX	0.139846	0.429101	0.0409914	0.841617	CENTER
AN32A_15	sp|O35381|AN32A_MOUSE,sp|Q64G17|AN32C_MOUSE	O35381	15	0.988	_MEMDKRIYLELRNRTPSDVKELVLDNCKSI	T	P	S	D	8	5	3	-1.63095	1.33863	-0.224733	0.124067	0.700077	0.542169	-0.0531546	-1.35289	STYX	0.061418	0.72759	-0.287959	0.66948	CENTER
AN32B_129	sp|Q9EST5|AN32B_MOUSE	Q9EST5	129	0.992	CLKSLDLFGCEVTNRSDYRETVFRLLPQLSY	S	D	Y	R	4	2	2	0.452832	0.175513	NA	NA	NA	NA	-0.405967	-0.300081	STYX	0.314172	0.0942778	-0.353024	0.284938	CENTER
AN32B_15	sp|Q9EST5|AN32B_MOUSE	Q9EST5	15	1	_MDMKRRIHLELRNRTPAAVRELVLDNCKAM	T	P	A	A	6	3	3	-0.736241	-0.327992	0.421139	NA	NA	0.607496	0.5563	0.161912	STYX	-0.214364	0.285344	0.441903	0.136866	CENTER
ANC2_485	sp|Q8BZQ7|ANC2_MOUSE	Q8BZQ7	485	0.936	ELSKTDPACLETGQDSEDDSGEPEDWVPDPV	S	E	D	D	4	2	2	0.220322	0.591808	NA	NA	NA	NA	-0.499404	0.746578	STYX	0.406065	0.0630097	0.123587	0.848759	CENTER
ANCHR_202	sp|Q9DAZ9|ANCHR_MOUSE	Q9DAZ9	202	0.998	AEVAIDENCQPRASASLQNDLNKGAARSQRT	S	L	Q	N	7	5	2	0.40156	-0.179615	-0.192214	0.0436941	0.148349	NA	-0.00424466	-0.260281	STYX	0.0443548	0.861592	-0.132263	0.692664	CENTER
ANCHR_280	sp|Q9DAZ9|ANCHR_MOUSE	Q9DAZ9	280	0.999	QDPSRVTLQDYHLPDSDEDEETAIQRVMQQL	S	D	E	D	5	3	2	0.286461	-0.243623	0.225346	NA	NA	NA	-0.115243	0.226307	STYX	0.0893945	0.629462	0.0555319	0.843886	CENTER
ANCHR_69	sp|Q9DAZ9|ANCHR_MOUSE	Q9DAZ9	69	0.999	HTILTRGSSDNASKWSPPQNYKKRVAALEAK	S	P	P	Q	8	5	3	-0.19171	-0.0585346	-0.173891	-0.268952	0.23181	-0.145197	0.00167459	0.844664	STYX	-0.0922555	0.0902801	0.233714	0.531609	CENTER
ANDR_630	sp|P19091|ANDR_MOUSE	P19091	630	0.998	GNLKLQEEGENSNAGSPTEDPSQKMTVSHIE	S	P	T	E	7	5	2	-0.690212	0.193087	-0.0793748	0.369429	-0.151917	-0.423666	-1.22812	NA	STYX	-0.0717977	0.515351	-0.825896	0.0728481	CENTER
ANDR_75	sp|P19091|ANDR_MOUSE	P19091	75	0.999	TSPRRRRRQQHTEDGSPQAHIRGPTGYLALE	S	P	Q	A	8	5	3	-0.338754	0.155873	-0.291595	-0.237244	0.17354	-0.897552	-0.7136	-0.420808	STYX	-0.107636	0.190331	-0.67732	0.0340058	CENTER
ANFY1_861	sp|Q810B6|ANFY1_MOUSE	Q810B6	861	1	TYKNNKAAEAILKRESGAAEQVDNKGRNFLH	S	G	A	A	4	2	2	NA	1.0849	-0.293286	NA	NA	-0.501229	-0.111679	NA	STYX	0.395808	0.924654	-0.306454	0.374625	CENTER
ANGE1_36 37 38	sp|Q8VCU0|ANGE1_MOUSE	Q8VCU0	36 37 38	0.895	SDAFFTCRKNALLAKSSSPQVEGNFAMAPRG DAFFTCRKNALLAKSSSPQVEGNFAMAPRGP AFFTCRKNALLAKSSSPQVEGNFAMAPRGPD	S	S	S	P	7	5	2	-0.508842	0.225645	0.0347659	-0.141706	-0.165587	0.125282	NA	0.729021	STYX	-0.111145	0.174541	0.427151	0.264017	CENTER
ANGE1_38	sp|Q8VCU0|ANGE1_MOUSE	Q8VCU0	38	0.993	AFFTCRKNALLAKSSSPQVEGNFAMAPRGPD	S	P	Q	V	7	4	3	-0.525816	-0.172067	0.10351	-0.0347709	NA	0.197045	0.332357	0.331025	STYX	-0.157286	0.135755	0.286809	0.273107	CENTER
ANGE2_115	sp|Q8K1C0|ANGE2_MOUSE	Q8K1C0	115	0.994	LSNASLIHLSRHVMTSDRDEPLSKRRKHQGT	S	D	R	D	7	4	3	NA	0.697811	-0.277075	-0.0140312	-0.0439921	0.336728	0.804164	0.489017	STYX	0.0906782	0.674633	0.543303	0.0797441	CENTER
ANGT_49	sp|P11859|ANGT_MOUSE	P11859	49	0.942	LLYHNKSTCAQLENPSVETLPESTFEPVPIQ	S	V	E	T	5	3	2	0.402812	NA	0.218662	0.0963069	NA	-0.164641	NA	-0.506101	STYX	0.23926	0.0893525	-0.335371	0.328037	CENTER
ANK1_1376	sp|Q02357|ANK1_MOUSE	Q02357	1376	0.997	PCTKGSGAEDRRRTLTPLTLRYSILSESRLG	T	P	L	T	5	3	2	NA	-0.901419	NA	0.538699	-1.0354	0.16857	NA	0.750543	STYX	-0.466039	0.274279	0.459556	0.229894	CENTER
ANK1_1759	sp|Q02357|ANK1_MOUSE	Q02357	1759	0.998	VSTREHVQRGPPETGSPKAGKEPSLWAPESA	S	P	K	A	7	5	2	0.391369	0.791869	-0.14529	-0.183476	0.267752	0.506501	NA	0.0929963	STYX	0.224445	0.445033	0.299749	0.38511	CENTER
ANK1_777	sp|Q02357|ANK1_MOUSE	Q02357	777	0.985	NGTTPLAIAKRLGYISVTDVLKVVTDETSVV	S	V	T	D	4	2	2	0.246218	-0.570891	NA	NA	NA	NA	-0.121606	0.353316	STYX	-0.162336	0.691697	0.115855	0.727289	CENTER
ANK1_862	sp|Q02357|ANK1_MOUSE	Q02357	862	0.997	DQVVESPAIPRIPCVTPETVVIRSEDQEQAS	T	P	E	T	7	4	3	0.723917	-0.466354	NA	-0.00439922	-0.302559	0.0540179	-0.0589205	-0.107662	STYX	-0.0123488	0.348741	-0.0375216	0.909249	CENTER
ANK1_957	sp|Q02357|ANK1_MOUSE	Q02357	957	0.999	PTRITCRLVKPQKLNTPPPLAEEEGLASRII	T	P	P	P	5	3	2	NA	-0.283996	0.027792	NA	-0.406048	-0.303526	NA	-0.0405385	STYX	-0.220751	0.0645964	-0.172032	0.602358	CENTER
ANK3_1405 1406	sp|G5E8K5|ANK3_MOUSE	G5E8K5	1405 1406	0.898	SFKENRLPFSIKIRDTSQEPCGRLSFLKEPK FKENRLPFSIKIRDTSQEPCGRLSFLKEPKT	T	S	Q	E	7	4	3	-0.450515	2.29387	-0.362565	NA	0.236535	-0.58495	-0.60288	-0.28351	STYX	0.429331	0.820058	-0.490447	0.0907472	CENTER
ANK3_1406	sp|G5E8K5|ANK3_MOUSE	G5E8K5	1406	0.989	FKENRLPFSIKIRDTSQEPCGRLSFLKEPKT	S	Q	E	P	8	5	3	-0.564773	-0.520395	-0.080045	0.330629	0.0595603	-1.36102	-0.527385	-0.228908	STYQ	-0.155005	0.228762	-0.705769	0.0613582	CENTER
ANKAR_1381	sp|A2RT91|ANKAR_MOUSE	A2RT91	1381	0.996	KEHRQKTRPKIQPRDSLTLLPPVTNVKELFR	S	L	T	L	7	4	3	0.391994	-0.356828	NA	-0.141815	-0.399342	0.792503	1.13402	1.14306	STYX	-0.126498	0.129494	1.0232	0.0101406	NR
ANKE1_726	sp|Q9D2J7|ANKE1_MOUSE	Q9D2J7	726	0.999	FTKKVDITFIPKRIWSPEATTAELIRKRELR	S	P	E	A	7	4	3	0.244423	-0.428435	NA	0.224566	-0.149537	0.677958	0.729453	0.694127	STYX	-0.027246	0.735151	0.700513	0.0322314	CENTER
ANKL2_535	sp|Q6P1H6|ANKL2_MOUSE	Q6P1H6	535	0.996	PRDPVMTLRAFVGPLSPSKAEDFRKLWKTPP	S	P	S	K	6	4	2	NA	-0.00376526	-0.193364	0.220376	-0.172409	NA	0.56136	0.626954	STYX	-0.0372909	0.348146	0.594157	0.116625	CENTER
ANKL2_895	sp|Q6P1H6|ANKL2_MOUSE	Q6P1H6	895	0.999	STVMCYSPSDRQSWPSPALKGKFTTELVDLD	S	P	A	L	7	4	3	0.439881	-0.387622	-0.030981	-0.0422372	NA	0.370317	0.292596	0.13294	STYX	-0.00523972	0.541834	0.265284	0.310979	CENTER
ANKS3_225	sp|Q9CZK6|ANKS3_MOUSE	Q9CZK6	225	0.998	RQFGHMKIVALMETHSPVLPKSLYRSPEKYE	S	P	V	L	5	2	3	0.374025	-0.326063	NA	NA	NA	-0.940786	-0.801404	-0.704469	STYX	0.023981	0.887805	-0.815553	0.0154447	CENTER
ANKZ1_86	sp|Q80UU1|ANKZ1_MOUSE	Q80UU1	86	0.996	RTSCPGENTSSGGKVSPYSLEISEKLFCSAC	S	P	Y	S	7	4	3	-0.0975915	0.0682876	0.233752	NA	-0.0807462	-0.251628	-0.381284	-1.30781	STYX	0.0309255	0.82808	-0.646905	0.0798591	CENTER
ANLN_180	sp|Q8K298|ANLN_MOUSE	Q8K298	180	0.997	ESSYFAPVPTEDKAASPSKPPISNASATPVG	S	P	S	K	8	5	3	0.825624	0.185075	-0.0662175	-0.284108	-0.163901	0.456825	0.624424	-0.0617359	STYX	0.0992944	0.6568	0.339838	0.26078	CENTER
ANLN_182	sp|Q8K298|ANLN_MOUSE	Q8K298	182	0.987	SYFAPVPTEDKAASPSKPPISNASATPVGRR	S	K	P	P	8	5	3	0.808213	0.0386111	-0.132764	0.0226799	-0.10448	0.508245	0.311487	-0.0201428	STYX	0.126452	0.825131	0.26653	0.343442	CENTER
ANLN_293	sp|Q8K298|ANLN_MOUSE	Q8K298	293	0.997	GPLLSASVSSSVKASSPVTAATFITENREAQ	S	P	V	T	8	5	3	0.915987	0.117268	-0.126237	-0.113458	-0.0521571	0.162415	-0.216351	-0.194375	STYX	0.148281	0.802948	-0.0827702	0.766953	CENTER
ANLN_318	sp|Q8K298|ANLN_MOUSE	Q8K298	318	0.998	ENREAQNPELLHKTASPLKTEARKPCEKPTL	S	P	L	K	8	5	3	2.57213	-0.0943077	-0.221035	-0.107438	-0.052158	1.04793	0.581632	0.220073	STYX	0.419439	0.298375	0.616544	0.0718121	CENTER
ANLN_359	sp|Q8K298|ANLN_MOUSE	Q8K298	359	1	NREVCLQSQSKDKLATPGGRGIKPFLERFGE	T	P	G	G	6	4	2	0.147859	-0.658159	0.201864	NA	-0.690146	1.60844	NA	2.09904	STYX	-0.249646	0.403509	1.85374	0.0163204	NR
ANLN_513	sp|Q8K298|ANLN_MOUSE	Q8K298	513	0.997	STEPAGSTESEMTKSSPLKITLFLEEEKSLK	S	P	L	K	7	4	3	2.51846	0.16821	-0.0256374	NA	-0.627835	0.57379	0.62314	0.578749	STYX	0.508298	0.82799	0.591893	0.0552675	CENTER
ANLN_637	sp|Q8K298|ANLN_MOUSE	Q8K298	637	0.998	SSPPSELRDSNLSAASPKPGKFQRTRVPRAE	S	P	K	P	7	4	3	NA	-0.0872647	0.0413804	0.164354	-0.00608605	0.199184	0.722559	0.293702	STYX	0.0280959	0.897411	0.405148	0.170009	CENTER
ANLN_96	sp|Q8K298|ANLN_MOUSE	Q8K298	96	0.999	PDLENTEPIDVAKPCSPMPAPRQAKPPAPAA	S	P	M	P	8	5	3	1.0697	0.24911	0.251263	0.563737	0.0160113	0.379914	0.212577	0.193145	STYX	0.429964	0.0153402	0.261879	0.312386	CENTER
ANMY1_346	sp|Q8C0W1|ANMY1_MOUSE	Q8C0W1	346	0.999	KSFHPNIAERTLLQESPKSLVTPKISFLLAD	S	P	K	S	7	4	3	0.682816	-0.55293	NA	-0.147167	-0.523282	0.324401	0.341454	1.398	STYX	-0.135141	0.136669	0.687951	0.074381	CENTER
ANPRA_525	sp|P18293|ANPRA_MOUSE	P18293	525	0.995	DLQPSSLERHLRSAGSRLTLSGRGSNYGSLL	S	R	L	T	7	5	2	0.27712	-0.0912455	-0.316067	-0.174506	-0.462043	NA	0.0837133	-0.286016	STYX	-0.153348	0.0568227	-0.101152	0.774241	CENTER
ANPRC_25 26 31	sp|P70180|ANPRC_MOUSE	P70180	25 26 31	0.856	SACVLLARVLLAGGASSGAGDTRPGSRRRAR ACVLLARVLLAGGASSGAGDTRPGSRRRARE ARVLLAGGASSGAGDTRPGSRRRAREALAAQ	S	S	G	A	6	4	2	6.64	-0.218347	0.0256234	NA	0.264521	0.026182	NA	0.57753	STYX	1.67795	0.467942	0.301856	0.409675	NR
ANPRC_528	sp|P70180|ANPRC_MOUSE	P70180	528	1	QEESNIGKHRELREDSIRSHFSVA_______	S	I	R	S	4	2	2	0.469794	-0.416479	NA	NA	NA	0.0960714	NA	0.198186	STYX	0.0266573	0.914124	0.147129	0.615886	CENTER
ANR11_1070	sp|E9Q4F7|ANR11_MOUSE	E9Q4F7	1070	1	GKEKHKDIHSKDRKASFDQLREKKEKVFSSI	S	F	D	Q	5	2	3	NA	-0.106757	-0.4503	NA	NA	-0.457266	-0.188871	-1.37272	STYX	-0.278529	0.0580724	-0.672952	0.0784654	CENTER
ANR11_1676	sp|E9Q4F7|ANR11_MOUSE	E9Q4F7	1676	1	KDWLSGQPLKEVLPASPRTEQSRPTGVPTPT	S	P	R	T	5	3	2	0.696739	-0.481465	-0.0054853	NA	NA	NA	-0.267732	0.250144	STYX	0.0699294	0.845278	-0.0087939	0.98909	CENTER
ANR11_1777	sp|E9Q4F7|ANR11_MOUSE	E9Q4F7	1777	0.995	QTPTRPISTNLYRSISVDIRRTPEEEFSAGD	S	V	D	I	5	3	2	0.529058	-0.262193	NA	0.568053	NA	-0.276144	NA	-0.431234	STYX	0.278306	0.355841	-0.353689	0.285824	CENTER
ANR11_1808	sp|E9Q4F7|ANR11_MOUSE	E9Q4F7	1808	0.999	KLFRQQSVPAPSSFDSPVQHLLEEKAPLPPV	S	P	V	Q	5	2	3	0.4328	0.322656	NA	NA	NA	-0.344373	-0.242301	-0.318099	STYX	0.377728	0.050805	-0.301591	0.255489	CENTER
ANR11_2354	sp|E9Q4F7|ANR11_MOUSE	E9Q4F7	2354	1	KDPMPTPASRAKGRASEEEDAQAQHPRKRRF	S	E	E	E	5	3	2	NA	-0.172314	-0.509703	NA	0.437806	-3.76857	NA	-0.0985391	STYX	-0.0814037	0.382493	-1.93355	0.17157	NR
ANR11_276	sp|E9Q4F7|ANR11_MOUSE	E9Q4F7	276	0.959	QQSNRKGETPLKVANSPTMVNLLLGKGTYTS	S	P	T	M	5	2	3	0.830624	-0.203944	NA	NA	NA	-0.0899209	-0.176993	-0.0459376	STYX	0.31334	0.856722	-0.104284	0.705784	CENTER
ANR17_15	sp|Q99NH0|ANR17_MOUSE	Q99NH0	15	0.999	_MEKATVPAAAEGEGSPPAAAAVAAPPAAAA	S	P	P	A	8	5	3	-0.426831	-0.0208728	0.0485744	0.270139	0.0464605	-0.0527506	-0.324831	-0.160605	STYX	-0.016506	0.793431	-0.179396	0.506053	CENTER
ANR17_2041	sp|Q99NH0|ANR17_MOUSE	Q99NH0	2041	0.998	PMPTAKEHYPVSSPSSPSPPAQPGGVSRNSP	S	P	S	P	5	3	2	-0.370281	0.444844	0.144811	NA	NA	NA	0.0145487	-0.0400569	STYX	0.0731245	0.730773	-0.0127541	0.984779	CENTER
ANR17_2401	sp|Q99NH0|ANR17_MOUSE	Q99NH0	2401	0.999	NESPAQSVSSGVRAPSPAPSSVPLGSEKPSS	S	P	A	P	8	5	3	-0.303311	0.151836	0.0942737	0.16231	0.000609637	-0.116124	-0.192735	-0.114004	STYX	0.0211436	0.903845	-0.140955	0.598837	CENTER
ANR17_41 42	sp|Q99NH0|ANR17_MOUSE	Q99NH0	41 42	0.88	PAAAAAEVGGGARPASSPRGMVRVCDLLLKK AAAAAEVGGGARPASSPRGMVRVCDLLLKKK	S	S	P	R	7	4	3	-0.488235	NA	0.10685	-0.0101678	0.0457851	-0.109808	-0.426088	-0.310432	STYX	-0.0864419	0.503952	-0.28211	0.29776	CENTER
ANR27_634	sp|Q3UMR0|ANR27_MOUSE	Q3UMR0	634	0.998	LSSDRRPRPSEVPAQSPTRSVDSISQGSSTS	S	P	T	R	5	3	2	-0.476308	0.606244	-0.181134	NA	NA	0.803809	NA	0.379117	STYX	-0.0170661	0.41178	0.591463	0.13084	CENTER
ANR27_961	sp|Q3UMR0|ANR27_MOUSE	Q3UMR0	961	1	RFQERTSRETMGRDRSVPDLAGRSLQEPEKQ	S	V	P	D	7	5	2	0.139307	-0.205811	0.040538	0.21358	-0.0560336	-0.257101	NA	0.147058	STYX	0.0263162	0.909507	-0.0550216	0.886382	CENTER
ANR28_1011	sp|Q505D1|ANR28_MOUSE	Q505D1	1011	0.996	TFNAINRYTNTSKTVSFEALPIMRNEASSYC	S	F	E	A	7	4	3	0.352199	-0.989379	NA	0.244913	-0.204485	-0.139777	-0.501969	-0.364802	STYX	-0.149188	0.751789	-0.335516	0.223017	CENTER
ANR42_507	sp|Q3V096|ANR42_MOUSE	Q3V096	507	1	SCESSKEKRRVKKKVSPGGVFVRSYQRIRTS	S	P	G	G	8	5	3	0.319059	-0.339296	-0.252571	-0.0329725	-0.114104	1.38251	0.898773	1.16828	STYX	-0.0839768	0.134326	1.14985	0.00740414	NR
ANR45_233	sp|Q810N6|ANR45_MOUSE	Q810N6	233	1	ISEIFEQKQQLEDIVSPILAKMSTPRHFAAS	S	P	I	L	5	2	3	0.435422	-0.111029	NA	NA	NA	0.841256	0.701552	1.09208	STYX	0.162196	0.762106	0.878295	0.0164436	NR
ANR55_474	sp|Q8BLD6|ANR55_MOUSE	Q8BLD6	474	0.994	NAGPQHTAQRSQKSRSEQDLLNNRTGCPVSL	S	E	Q	D	7	5	2	-0.104371	-0.0896578	0.0366278	-0.302526	0.0166845	NA	0.420727	0.436023	STYX	-0.0886485	0.114439	0.428375	0.215182	CENTER
ANS1A_638	sp|P59672|ANS1A_MOUSE	P59672	638	0.988	APPTSKPKAELKLSRSLSKSDSDLLTCSPTE	S	L	S	K	5	3	2	NA	NA	-0.0334882	0.190693	0.0604311	NA	-0.353762	-0.697078	STYX	0.0725454	0.697853	-0.52542	0.146454	CENTER
ANS1A_640	sp|P59672|ANS1A_MOUSE	P59672	640	0.989	PTSKPKAELKLSRSLSKSDSDLLTCSPTEDA	S	K	S	D	8	5	3	0.110568	0.450202	0.112879	-0.124328	-0.103634	-0.553372	-0.590191	-1.29799	STYX	0.0891375	0.824889	-0.813851	0.0238382	CENTER
ANS1A_642	sp|P59672|ANS1A_MOUSE	P59672	642	0.994	SKPKAELKLSRSLSKSDSDLLTCSPTEDATM	S	D	S	D	8	5	3	0.0291789	0.282517	0.164185	-0.0402747	-0.219052	-0.405079	-0.214776	-0.449316	STYX	0.043311	0.975173	-0.35639	0.189789	CENTER
ANS1A_663	sp|P59672|ANS1A_MOUSE	P59672	663	0.997	TCSPTEDATMGSRSESLSNCSIGKKRLEKSP	S	L	S	N	8	5	3	-0.0104302	-0.0973461	-0.0845267	-0.18075	-0.0826855	-0.581275	-0.588638	-0.944162	STYX	-0.0911477	0.0511846	-0.704692	0.028568	CENTER
ANS1A_665	sp|P59672|ANS1A_MOUSE	P59672	665	0.967	SPTEDATMGSRSESLSNCSIGKKRLEKSPSF	S	N	C	S	8	5	3	0.0990715	-0.0391995	-0.138271	-0.16822	0.104968	-0.404498	-0.327124	-0.819678	STYX	-0.0283303	0.372984	-0.5171	0.0850051	CENTER
ANS1A_679	sp|P59672|ANS1A_MOUSE	P59672	679	0.996	LSNCSIGKKRLEKSPSFASEWDEIEKIMSSI	S	F	A	S	8	5	3	0.358093	0.246221	0.205469	-0.033698	-0.71265	-0.38307	-0.889031	-0.462958	STYX	0.0126868	0.567864	-0.578353	0.0603092	CENTER
ANS1A_692 693	sp|P59672|ANS1A_MOUSE	P59672	692 693	0.899	SPSFASEWDEIEKIMSSIGEGIDFSQEQQKI PSFASEWDEIEKIMSSIGEGIDFSQEQQKIS	S	S	I	G	6	3	3	0.339124	0.33994	0.587454	NA	NA	-0.263284	-0.968527	-0.696672	STYX	0.422173	0.0146887	-0.642827	0.0506454	CENTER
ANS1A_693	sp|P59672|ANS1A_MOUSE	P59672	693	0.99	PSFASEWDEIEKIMSSIGEGIDFSQEQQKIS	S	I	G	E	6	3	3	0.135198	0.147985	0.279071	NA	NA	-0.635874	-1.01669	-0.703534	STYX	0.187418	0.123272	-0.785365	0.0190801	CENTER
ANS1A_903	sp|P59672|ANS1A_MOUSE	P59672	903	0.999	DLLLPSADTSRRRHDSLPDPGTASRADRFRV	S	L	P	D	8	5	3	-0.76063	0.0415851	0.226348	0.0798596	0.212487	-0.429225	-0.373751	-0.428557	STYX	-0.0400701	0.702391	-0.410511	0.132235	CENTER
ANX11_451	sp|P97384|ANX11_MOUSE	P97384	451	0.996	ERLNKAMRGAGTKDRTLIRIMVSRSELDLLD	T	L	I	R	8	5	3	0.45102	0.24142	-0.143198	0.126504	-0.337404	-0.451565	-0.911503	-0.107014	STYX	0.0676685	0.836519	-0.490027	0.125665	CENTER
AP1S1_147	sp|P61967|AP1S1_MOUSE	P61967	147	1	LKAIEQADLLQEEDESPRSVLEEMGLA____	S	P	R	S	4	2	2	0.580647	-0.346989	NA	NA	NA	NA	-0.125174	-0.372342	STYX	0.116829	0.979815	-0.248758	0.44866	CENTER
AP2A1_635 636 637	sp|P17426|AP2A1_MOUSE	P17426	635 636 637	0.894	KGPGAASALDDSRRDTSSNDINGGVEPTPST GPGAASALDDSRRDTSSNDINGGVEPTPSTV PGAASALDDSRRDTSSNDINGGVEPTPSTVS	T	S	S	N	5	2	3	-0.0372931	0.375162	NA	NA	NA	0.0493063	-0.139724	-0.00853565	STYX	0.168935	0.547996	-0.0329846	0.92113	CENTER
AP2A1_655	sp|P17426|AP2A1_MOUSE	P17426	655	0.999	INGGVEPTPSTVSTPSPSADLLGLRAAPPPA	S	P	S	A	8	5	3	-0.0801565	0.272781	0.417594	0.449835	-0.242649	-0.0193537	-0.29024	-0.0588154	STYX	0.163481	0.420436	-0.122803	0.653776	CENTER
AP3B1_276	sp|Q9Z1T1|AP3B1_MOUSE	Q9Z1T1	276	0.998	REDGGLEDNEKNFYESEEEEEEKEKSSRKKS	S	E	E	E	6	3	3	0.492464	-0.470465	0.018035	NA	NA	-0.578054	-0.308149	0.4129	STYX	0.0133448	0.883967	-0.157768	0.582223	CENTER
AP3B1_662	sp|Q9Z1T1|AP3B1_MOUSE	Q9Z1T1	662	1	PSVRNVEVIESAKEWTPLGKTKKEKPMKKFY	T	P	L	G	5	2	3	1.51181	-0.709138	NA	NA	NA	-0.0604605	-0.450024	0.593698	STYX	0.401335	0.996407	0.0277381	0.977333	CENTER
AP3D1_754 755	sp|O54774|AP3D1_MOUSE	O54774	754 755	0.884	KDKKRKKKEKGKRRHSSLPTESDEDIAPAQR DKKRKKKEKGKRRHSSLPTESDEDIAPAQRV	S	S	L	P	5	2	3	0.11794	1.67011	NA	NA	NA	-0.223576	-0.0975753	0.456793	STYX	0.894026	0.102338	0.045214	0.895802	NR
AP3D1_760	sp|O54774|AP3D1_MOUSE	O54774	760	0.999	KKEKGKRRHSSLPTESDEDIAPAQRVDIITE	S	D	E	D	5	2	3	0.00640007	-0.0180257	NA	NA	NA	-0.10798	0.111625	0.116895	STYX	-0.00581283	0.685909	0.04018	0.842349	CENTER
AP3D1_784	sp|O54774|AP3D1_MOUSE	O54774	784	0.999	RVDIITEEMPENALPSDEDDKDPNDPYRALD	S	D	E	D	5	2	3	0.62744	0.273663	NA	NA	NA	0.0886916	-0.109373	0.259346	STYX	0.450552	0.048112	0.0795548	0.738227	CENTER
AP3D1_825	sp|O54774|AP3D1_MOUSE	O54774	825	1	EKLPVQKHRNAEAVKSPEKEGVLGVEKKSKK	S	P	E	K	7	4	3	NA	0.334892	-0.0443291	-0.173427	0.303185	0.614689	0.799213	0.591807	STYX	0.10508	0.725835	0.66857	0.0386284	CENTER
AP3D1_9	sp|O54774|AP3D1_MOUSE	O54774	9	1	_______MALKMVKGSIDRMFDKNLQDLVRG	S	I	D	R	7	4	3	0.615782	-0.689391	0.378925	0.356243	NA	-0.439123	-0.742303	-1.6589	STYX	0.16539	0.188947	-0.946776	0.0216857	NR
AP3S1_191	sp|Q9DCR2|AP3S1_MOUSE	Q9DCR2	191	1	NINIGDISIKVPNLPSFK_____________	S	F	K	_	4	2	2	0.916121	-0.573168	NA	NA	NA	NA	0.0204105	0.323187	STYX	0.171477	0.982819	0.171799	0.587385	CENTER
AP4AT_305	sp|Q3U3N6|AP4AT_MOUSE	Q3U3N6	305	1	GTSREPGDLAERAEATPPNDCQQELNLVRTV	T	P	P	N	8	5	3	-0.0699843	0.27255	0.202603	-0.16601	-0.0514804	-0.629508	-0.480564	-0.785088	STYX	0.0375357	0.816513	-0.63172	0.0392995	CENTER
AP4AT_400	sp|Q3U3N6|AP4AT_MOUSE	Q3U3N6	400	0.999	VLLLCRQQLQELGAGSPGPVTNKATKILRHF	S	P	G	P	8	5	3	0.362806	0.0882287	-0.157459	0.0324568	0.0612862	-0.247172	-0.152032	-0.264268	STYX	0.0774637	0.723628	-0.221157	0.403828	CENTER
AP4E1_961 962	sp|Q80V94|AP4E1_MOUSE	Q80V94	961 962	0.883	IFPVENFKIIEQPECSSPVIETERTKSFQYS FPVENFKIIEQPECSSPVIETERTKSFQYSV	S	S	P	V	6	3	3	NA	NA	-0.0274512	-0.187332	-0.0180453	-0.244539	-0.597944	-0.330004	STYX	-0.0776096	0.205509	-0.390829	0.163933	CENTER
AP4E1_962	sp|Q80V94|AP4E1_MOUSE	Q80V94	962	0.981	FPVENFKIIEQPECSSPVIETERTKSFQYSV	S	P	V	I	5	2	3	0.209805	0.0015183	NA	NA	NA	-0.196698	-0.525486	-0.382253	STYX	0.105661	0.575599	-0.368146	0.182401	CENTER
APBA1_309	sp|B2RUJ5|APBA1_MOUSE	B2RUJ5	309	0.999	AEDMPEAEQDLERAPTPGGGHPDSPGLPAPA	T	P	G	G	5	3	2	-0.613634	NA	0.111114	0.145301	NA	0.414506	0.590508	NA	STYX	-0.119073	0.81785	0.502507	0.165644	CENTER
APBA1_317	sp|B2RUJ5|APBA1_MOUSE	B2RUJ5	317	0.999	QDLERAPTPGGGHPDSPGLPAPAGQQQRVVG	S	P	G	L	8	5	3	-0.099016	0.477425	0.0158256	0.0477834	0.173807	0.340434	0.472287	0.0507053	STYX	0.123165	0.520984	0.287809	0.293377	CENTER
APBA1_333	sp|B2RUJ5|APBA1_MOUSE	B2RUJ5	333	0.999	PGLPAPAGQQQRVVGTPGGSEVGQRYSKEKR	T	P	G	G	7	5	2	0.467027	-0.194607	-0.303194	0.0935778	0.644548	NA	-0.137218	0.136753	STYX	0.141471	0.783069	-0.00023225	0.978378	CENTER
APBA1_573	sp|B2RUJ5|APBA1_MOUSE	B2RUJ5	573	0.998	NIVVLMARRRMPRSNSQENVEASHPSQDGKR	S	Q	E	N	8	5	3	0.514078	-0.373227	0.10815	-0.735817	1.27239	0.951224	1.14437	1.48769	STYQ	0.157115	0.849077	1.19443	0.00681998	NR
APC_1040	sp|Q61315|APC_MOUSE	Q61315	1040	0.998	YSLKYSDEQLNSGRQSPSQNERWARPKHVIE	S	P	S	Q	7	4	3	-0.708287	NA	0.00200287	-0.110968	0.210612	-0.336055	-0.761906	-0.242018	STYX	-0.15166	0.330301	-0.44666	0.130491	CENTER
APC_1437	sp|Q61315|APC_MOUSE	Q61315	1437	0.999	LPDSPGQTMPPSRSKTPPPPPQTVQAKREVP	T	P	P	P	8	5	3	-0.513268	0.74205	-0.0739128	0.0113201	0.227457	-0.632805	-0.943584	-1.19541	STYX	0.0787292	0.97633	-0.923932	0.0121134	NR
APC_2260	sp|Q61315|APC_MOUSE	Q61315	2260	0.996	PVSKKGPPLKTPASKSPSEGPGATTSPRGTK	S	P	S	E	6	3	3	-0.189031	0.168482	0.1333	NA	NA	-0.901322	-1.48419	-0.270158	STYX	0.037584	0.914232	-0.885225	0.0296735	NR
APC_2270	sp|Q61315|APC_MOUSE	Q61315	2270	0.99	TPASKSPSEGPGATTSPRGTKPAGKSELSPI	S	P	R	G	5	2	3	-0.0640917	-0.226682	NA	NA	NA	-0.92677	-0.846295	-0.991984	STYX	-0.145387	0.121945	-0.921683	0.00985832	NR
APC_2283	sp|Q61315|APC_MOUSE	Q61315	2283	0.994	TTSPRGTKPAGKSELSPITRQTSQISGSNKG	S	P	I	T	5	3	2	NA	-0.608346	0.212811	NA	-0.350034	NA	-0.922733	-0.6319	STYX	-0.248523	0.188123	-0.777317	0.056698	CENTER
APC_2449	sp|Q61315|APC_MOUSE	Q61315	2449	0.996	RPALVRQSTFIKEAPSPTLRRKLEESASFES	S	P	T	L	8	5	3	-0.211581	-0.460282	-0.209003	0.163011	-0.0695688	-0.220253	-0.190969	-0.246249	STYX	-0.157485	0.04675	-0.219157	0.403527	CENTER
APC_2674	sp|Q61315|APC_MOUSE	Q61315	2674	0.998	VRIEDCPINNPRSGRSPTGNTPPVIDSVSEK	S	P	T	G	5	3	2	NA	0.245103	0.184839	NA	-0.293992	-0.536915	NA	-0.480697	STYX	0.0453165	0.7692	-0.508806	0.145048	CENTER
APC_2713	sp|Q61315|APC_MOUSE	Q61315	2713	0.998	KDSKDTHGKQSVGSGSPVQTVGLETRLNSFV	S	P	V	Q	7	4	3	-0.15518	0.215304	-0.016399	NA	-0.0228305	-0.20162	-0.820292	-0.613728	STYX	0.0052237	0.620393	-0.545213	0.0787835	CENTER
APC1_343	sp|P53995|APC1_MOUSE	P53995	343	0.994	QSRSTSSPSLHSRSPSISNMAALSRAHSPAL	S	I	S	N	6	4	2	NA	-0.735353	-0.0536999	0.173725	-0.0791128	-0.493969	NA	-0.555504	STYX	-0.17361	0.240929	-0.524737	0.135322	CENTER
APC1_688	sp|P53995|APC1_MOUSE	P53995	688	0.999	DRLAWTRSFDFEGSLSPVIAPKKARPSDTGS	S	P	V	I	6	3	3	0.754318	-0.175133	NA	0.0509438	NA	0.0567068	-0.210708	0.192282	STYX	0.210043	0.776978	0.01276	0.934623	CENTER
APEH_187	sp|Q8R146|APEH_MOUSE	Q8R146	187	0.997	KAESFFQTKALDVSASDEEMARPKKPDQAIK	S	D	E	E	8	5	3	0.150028	0.0638082	-0.0967154	-0.329056	-0.131257	0.0175003	0.181034	0.171055	STYX	-0.0686384	0.234133	0.123196	0.602	CENTER
APLF_149	sp|Q9D842|APLF_MOUSE	Q9D842	149	0.999	VNLPDKTTGASQLQGSPEITKTKCPTIDPMS	S	P	E	I	8	5	3	0.414556	0.214546	0.253858	-0.344854	-0.285328	-0.167155	0.264634	0.00536283	STYX	0.0505556	0.825937	0.0342805	0.881013	CENTER
APMAP_2	sp|Q9D7N9|APMAP_MOUSE	Q9D7N9	2	1	______________MSEADGLRQRRPLRPQV	S	E	A	D	4	2	2	1.21819	-0.479993	NA	NA	NA	-0.563227	NA	-0.658594	STYX	0.369097	0.992487	-0.61091	0.0958348	CENTER
APTX_150	sp|Q7TQC5|APTX_MOUSE	Q7TQC5	150	0.994	GTGLAPGSSPSQCSVSPKKDKNGATKKESLG	S	P	K	K	7	5	2	-0.506398	-0.00713454	0.191442	0.448288	-0.279448	0.250362	0.525064	NA	STYX	-0.03065	0.630004	0.387713	0.263527	CENTER
AR13B_328	sp|Q640N2|AR13B_MOUSE	Q640N2	328	0.999	RVVDSYREALSQQLDSEDEQDQRGSESGENS	S	E	D	E	5	2	3	-0.150973	-0.103419	NA	NA	NA	0.340292	0.276927	0.733797	STYX	-0.127196	0.116054	0.450339	0.130186	CENTER
AR2BP_151 152 153 154	sp|Q9D385|AR2BP_MOUSE	Q9D385	151 152 153 154	0.899	GLDLSSGLVVTSLCKSSSTPASQNNLRH___ LDLSSGLVVTSLCKSSSTPASQNNLRH____ DLSSGLVVTSLCKSSSTPASQNNLRH_____ LSSGLVVTSLCKSSSTPASQNNLRH______	S	S	S	T	6	4	2	NA	0.334603	0.112838	-0.00466264	0.62449	0.639342	NA	0.316016	STYX	0.266817	0.109562	0.477679	0.1898	CENTER
AR2BP_154	sp|Q9D385|AR2BP_MOUSE	Q9D385	154	0.994	LSSGLVVTSLCKSSSTPASQNNLRH______	T	P	A	S	6	4	2	-0.290983	0.0207753	0.0414524	-0.0418278	NA	NA	0.319101	0.138103	STYX	-0.0676457	0.294603	0.228602	0.467009	CENTER
AR6P4_140	sp|Q9JM93|AR6P4_MOUSE	Q9JM93	140	0.999	QAEALPGPSLDQWHRSAGEDNDGPVLTDEQK	S	A	G	E	6	3	3	0.35131	-0.0264096	NA	0.151532	NA	-0.20149	-0.0542186	0.0426861	STYX	0.158811	0.333524	-0.0710076	0.802613	CENTER
AR6P4_50	sp|Q9JM93|AR6P4_MOUSE	Q9JM93	50	0.99	SRNCSASRSQGHKAGSASGVEERSKHKAQRT	S	A	S	G	7	4	3	0.194031	0.979174	0.174437	NA	0.0671101	-0.188615	0.244377	-0.00758742	STYX	0.353688	0.0579893	0.0160582	0.939196	CENTER
AR6P6_80	sp|Q8BH07|AR6P6_MOUSE	Q8BH07	80	1	SETKRAPLLPRVGDGSPVLPDKRNGIFPATA	S	P	V	L	8	5	3	0.887417	0.0218277	0.27026	-0.161833	0.0589021	0.215592	0.365799	0.288458	STYX	0.215315	0.435341	0.28995	0.269727	CENTER
ARAF_214	sp|P04627|ARAF_MOUSE,sp|Q99N57|RAF1_MOUSE	P04627	214	0.989	FPAPANPPLQRIRSTSTPNVHMVSTTAPMDS	S	T	P	N	5	2	3	0.0689671	0.241071	NA	NA	NA	-1.08743	-0.475855	0.474582	STYX	0.155019	0.318173	-0.362903	0.348712	CENTER
ARAF_215	sp|P04627|ARAF_MOUSE	P04627	215	0.996	PAPANPPLQRIRSTSTPNVHMVSTTAPMDSS	T	P	N	V	4	2	2	0.0763274	0.0896063	NA	NA	NA	NA	-0.471341	0.0966217	STYX	0.0829669	0.583781	-0.18736	0.605899	CENTER
ARAF_255	sp|P04627|ARAF_MOUSE	P04627	255	0.997	STDAAGRGGDGAPRGSPSPASVSSGRKSPHS	S	P	S	P	6	3	3	-0.434325	0.0214762	0.906976	NA	NA	-0.573792	-0.67906	-0.366093	STYX	0.164709	0.969016	-0.539648	0.0661788	CENTER
ARAF_267	sp|P04627|ARAF_MOUSE	P04627	267	0.994	PRGSPSPASVSSGRKSPHSKLPSEQRERKSL	S	P	H	S	7	4	3	-0.161466	-0.0536848	-0.0102323	NA	-0.245459	0.407572	-0.928139	-0.511368	STYX	-0.11771	0.0627547	-0.343978	0.329661	CENTER
ARAF_580	sp|P04627|ARAF_MOUSE,sp|Q99N57|RAF1_MOUSE	P04627	580	0.997	IELLQRSLPKIERSASEPSLHRTQADELPAC	S	E	P	S	8	5	3	0.393344	-0.409601	0.56828	-0.586258	0.839171	-0.1461	-0.101552	-0.311242	STYX	0.160987	0.566461	-0.186298	0.487257	CENTER
ARBK1_670	sp|Q99MK8|ARBK1_MOUSE	Q99MK8	670	0.981	QQLVQRVPKMKNKPRSPVVELSKVPLIQRGS	S	P	V	V	6	3	3	0.582199	0.221381	-0.280301	NA	NA	-0.230052	-0.401094	0.0599129	STYX	0.174426	0.526533	-0.190411	0.490784	CENTER
ARFG1_135	sp|Q9EPJ9|ARFG1_MOUSE	Q9EPJ9	135	0.999	EGKEWSLESSPAQNWTPPQPKTLQFTAHRAS	T	P	P	Q	5	2	3	0.520543	0.580933	NA	NA	NA	0.251791	-0.445794	0.288514	STYX	0.550738	0.0281517	0.0315039	0.875846	CENTER
ARFG1_342	sp|Q9EPJ9|ARFG1_MOUSE	Q9EPJ9	342	0.996	SFWETFGSAEPPKAKSPSSDSWTCADASTGR	S	P	S	S	6	4	2	-0.757133	0.0138786	-0.173905	NA	0.117485	0.0540444	NA	0.0916863	STYX	-0.199919	0.202874	0.0728654	0.788448	CENTER
ARFG1_347	sp|Q9EPJ9|ARFG1_MOUSE	Q9EPJ9	347	0.995	FGSAEPPKAKSPSSDSWTCADASTGRRSSDS	S	W	T	C	7	5	2	-0.333293	0.103074	-0.230623	-0.102504	0.254673	-0.174533	NA	-0.619954	STYX	-0.0617345	0.290364	-0.397244	0.267181	CENTER
ARFG1_359	sp|Q9EPJ9|ARFG1_MOUSE	Q9EPJ9	359	0.995	SSDSWTCADASTGRRSSDSWDVWGSGSASNN	S	S	D	S	5	2	3	-0.193222	0.489546	NA	NA	NA	-0.995157	-1.0637	-0.315397	STYX	0.148162	0.916203	-0.79142	0.0280191	CENTER
ARFG1_360	sp|Q9EPJ9|ARFG1_MOUSE	Q9EPJ9	360	0.984	SDSWTCADASTGRRSSDSWDVWGSGSASNNK	S	D	S	W	5	2	3	-0.0530369	0.301852	NA	NA	NA	-0.646091	-1.59539	-0.442735	STYX	0.124408	0.667343	-0.89474	0.0257623	NR
ARFG2_145	sp|Q99K28|ARFG2_MOUSE	Q99K28	145	0.998	GTDLWIDSMNSAPSHSPEKKDSDFFTEHTQA	S	P	E	K	5	3	2	0.49901	NA	0.470133	NA	0.795008	NA	0.226242	0.0344986	STYX	0.58805	0.0071138	0.13037	0.660804	CENTER
ARFG2_239	sp|Q99K28|ARFG2_MOUSE	Q99K28	239	0.997	LGAKKGLGAQKVSNQSFTEIERQAQVAEKLR	S	F	T	E	6	3	3	NA	-0.399076	0.192853	NA	-0.397897	-0.487351	-0.613298	-0.232309	STYX	-0.201374	0.179653	-0.444319	0.120116	CENTER
ARFG2_339	sp|Q99K28|ARFG2_MOUSE	Q99K28	339	0.999	QMIEQETPLSAKSSRSQLDLFDDVGTFASGP	S	Q	L	D	7	4	3	-0.154718	0.072402	0.0627921	NA	-0.699672	-0.720234	-0.886185	-0.336853	STYQ	-0.179799	0.23335	-0.647758	0.0421919	CENTER
ARFG2_431 432	sp|Q99K28|ARFG2_MOUSE	Q99K28	431 432	0.898	ESSEARQKFAGAKAISSDMFFGREVDSEYEA SSEARQKFAGAKAISSDMFFGREVDSEYEAR	S	S	D	M	8	5	3	0.442504	-1.13378	0.173737	0.396686	-0.401887	-0.387485	-1.06236	-0.534063	STYX	-0.104549	0.857118	-0.661302	0.0448473	CENTER
ARFG2_432	sp|Q99K28|ARFG2_MOUSE	Q99K28	432	0.986	SSEARQKFAGAKAISSDMFFGREVDSEYEAR	S	D	M	F	4	2	2	0.690185	-0.530084	NA	NA	NA	-0.0105484	NA	-0.358529	STYX	0.0800505	0.959838	-0.184539	0.578171	CENTER
ARFG3_240 241	sp|Q9D8S3|ARFG3_MOUSE	Q9D8S3	240 241	0.898	LGAKKGSLGAQKLTNTSFTEIEKQAQAVDKR GAKKGSLGAQKLTNTSFTEIEKQAQAVDKRK	T	S	F	T	6	4	2	0.711522	NA	-0.0491631	-0.239649	-0.632924	0.14609	0.0860174	NA	STYX	-0.0525534	0.277045	0.116054	0.68206	CENTER
ARFG3_241	sp|Q9D8S3|ARFG3_MOUSE	Q9D8S3	241	0.995	GAKKGSLGAQKLTNTSFTEIEKQAQAVDKRK	S	F	T	E	5	2	3	1.20605	-0.633532	NA	NA	NA	0.0316813	-0.234219	-0.188769	STYX	0.286258	0.990658	-0.130435	0.629082	CENTER
ARFG3_331	sp|Q9D8S3|ARFG3_MOUSE	Q9D8S3	331	0.998	ISHSVTSDMQTIEQESPTLAKPRRKYQEDPE	S	P	T	L	8	5	3	-0.148352	0.224332	0.503297	-0.304172	0.536918	0.350399	0.0961664	0.696649	STYX	0.162405	0.543211	0.381072	0.199354	CENTER
ARFG3_372 373 374	sp|Q9D8S3|ARFG3_MOUSE	Q9D8S3	372 373 374	0.867	SEQSSRYFDDPMELRSSSFSSWDDGADSYWK EQSSRYFDDPMELRSSSFSSWDDGADSYWKK QSSRYFDDPMELRSSSFSSWDDGADSYWKKD	S	S	S	F	4	2	2	0.420892	-0.0148663	NA	NA	NA	-0.138148	-0.289462	NA	STYX	0.203013	0.44066	-0.213805	0.512275	CENTER
ARGL1_74 75	sp|Q3UL36|ARGL1_MOUSE	Q3UL36	74 75	0.898	RSTNAAASRRERERASSPPDRIDIFGRTVSK STNAAASRRERERASSPPDRIDIFGRTVSKR	S	S	P	P	8	5	3	0.206189	0.263391	-0.136321	-0.0309296	-0.0208632	0.349017	-0.00551789	-0.051005	STYX	0.0562934	0.953464	0.0974982	0.706977	CENTER
ARGL1_75	sp|Q3UL36|ARGL1_MOUSE	Q3UL36	75	1	STNAAASRRERERASSPPDRIDIFGRTVSKR	S	P	P	D	8	5	3	0.221391	0.328485	-0.0689282	-0.121526	-0.0994359	0.70607	0.00222822	-0.0681458	STYX	0.0519971	0.830053	0.213384	0.51335	CENTER
ARH_198	sp|Q8C142|ARH_MOUSE	Q8C142	198	0.996	KANQEGGDVPGTRRDSTPSLKTLVATGNLLD	S	T	P	S	8	5	3	0.108506	-0.223475	-0.0404213	0.091083	-0.152976	-1.01553	-1.17737	-0.385143	STYX	-0.0434568	0.314886	-0.859348	0.0207626	NR
ARH_198 199	sp|Q8C142|ARH_MOUSE	Q8C142	198 199	0.893	KANQEGGDVPGTRRDSTPSLKTLVATGNLLD ANQEGGDVPGTRRDSTPSLKTLVATGNLLDL	S	T	P	S	8	5	3	-0.0595519	-0.204738	-0.0687605	-0.0266597	0.058763	-0.832323	-0.775872	-0.406102	STYX	-0.0601894	0.163347	-0.671432	0.0346423	CENTER
ARH40_1080	sp|Q3UPH7|ARH40_MOUSE	Q3UPH7	1080	0.99	DGPWGIGTPRMERKRSISAQQRLVSELIACE	S	I	S	A	7	4	3	-2.08147	-0.248241	1.44059	0.840419	NA	-1.69708	-1.57465	-0.792572	STYX	-0.0121747	0.94346	-1.35477	0.0054856	NR
ARH40_959	sp|Q3UPH7|ARH40_MOUSE	Q3UPH7	959	1	QELERRIQQQLGEEASPRSHRRRRADSASSA	S	P	R	S	8	5	3	-0.0540124	0.123102	-0.176287	0.0639122	0.0696439	-0.459302	-0.705617	-1.16737	STYX	0.00527172	0.722076	-0.77743	0.0251558	CENTER
ARHG2_163	sp|Q60875|ARHG2_MOUSE	Q60875	163	0.999	KSVSTTNIAGHFNDESPLGLRQILSQSTDSL	S	P	L	G	7	5	2	0.502433	0.370284	0.529304	0.462907	0.0883871	NA	0.115618	0.857824	STYX	0.390663	0.0044829	0.486721	0.235924	CENTER
ARHG2_174	sp|Q60875|ARHG2_MOUSE	Q60875	174	0.989	FNDESPLGLRQILSQSTDSLNMRNRTLSVES	S	T	D	S	7	5	2	0.472474	-0.149477	0.277957	0.545304	-0.112571	0.170041	NA	0.215504	STYX	0.206737	0.370655	0.192772	0.519151	CENTER
ARHG2_646	sp|Q60875|ARHG2_MOUSE	Q60875	646	0.992	GMPPPALPRGLFRLESFESLRGERLLKDALR	S	F	E	S	5	2	3	NA	-0.651532	NA	-0.236504	NA	-1.10902	-1.02375	0.233954	STYX	-0.444018	0.0250567	-0.63294	0.129711	CENTER
ARHG2_885	sp|Q60875|ARHG2_MOUSE	Q60875	885	0.999	AEAPWARRPLDPRRRSLPAGDALYLSFNPPQ	S	L	P	A	5	2	3	0.320324	-0.0405442	NA	NA	NA	-0.0760043	-0.384972	-0.19627	STYX	0.13989	0.600306	-0.219082	0.417133	CENTER
ARHG2_931	sp|Q60875|ARHG2_MOUSE	Q60875	931	1	SLHRPFDDREAQELGSPEDRLQDSSDPDTGS	S	P	E	D	5	2	3	0.30763	0.868663	NA	NA	NA	-0.219829	0.424011	0.74783	STYX	0.588147	0.0380203	0.317337	0.333724	CENTER
ARHG2_955	sp|Q60875|ARHG2_MOUSE	Q60875	955	0.997	SDPDTGSEEEVSSRLSPPHSPRDFTRMQDIP	S	P	P	H	8	5	3	-0.481321	0.103062	-0.166035	0.0462179	-0.0806821	0.27999	0.799783	0.648783	STYX	-0.115752	0.155759	0.576186	0.0705136	CENTER
ARHG2_959	sp|Q60875|ARHG2_MOUSE	Q60875	959	0.994	TGSEEEVSSRLSPPHSPRDFTRMQDIPEETE	S	P	R	D	6	4	2	0.0514187	NA	0.181577	0.0771363	-0.318369	0.464481	NA	-0.0116453	STYX	-0.00205928	0.939682	0.226418	0.514069	CENTER
ARHG5_1109 1110	sp|E9Q7D5|ARHG5_MOUSE	E9Q7D5	1109 1110	0.875	QSQQRLDSLAEPHGLSSPRHRRKALVSSDSY SQQRLDSLAEPHGLSSPRHRRKALVSSDSYL	S	S	P	R	6	3	3	0.600915	-0.0837527	NA	NA	-0.189178	-0.476241	-0.363944	0.00607796	STYX	0.109328	0.70499	-0.278036	0.315921	CENTER
ARHG5_593	sp|E9Q7D5|ARHG5_MOUSE	E9Q7D5	593	0.998	PLSSYTGVTQHLRSNSFPGSHRTEQTPDSLG	S	F	P	G	7	4	3	0.131567	-0.347341	0.0853191	NA	-0.299155	-0.134328	0.295459	-0.215366	STYX	-0.107402	0.298138	-0.0180784	0.946325	CENTER
ARHG6_224	sp|Q8K4I3|ARHG6_MOUSE	Q8K4I3	224	0.999	PSNYVREIKPSERPLSPKAIKGFDTAPLTKN	S	P	K	A	8	5	3	0.24495	-0.104811	-0.229157	-0.0626569	-0.0605365	-0.569694	-0.594395	-0.635642	STYX	-0.0424422	0.215049	-0.59991	0.0439283	CENTER
ARHG6_639	sp|Q8K4I3|ARHG6_MOUSE	Q8K4I3	639	0.998	TMKKFLHKRKTERKASEEEYVIRKSTAALEE	S	E	E	E	8	5	3	0.30363	-0.70589	-0.313809	-0.210605	0.367897	0.132365	0.0350911	0.353818	STYX	-0.111755	0.35882	0.173758	0.4961	CENTER
ARHG6_648	sp|Q8K4I3|ARHG6_MOUSE,sp|Q9ES28|ARHG7_MOUSE	Q8K4I3	648	0.977	KTERKASEEEYVIRKSTAALEEDAQILKVIE	S	T	A	A	5	2	3	-0.0516232	-0.0477296	NA	NA	NA	-0.79795	-0.927781	-0.124403	STYX	-0.0496764	0.371637	-0.616711	0.0685004	CENTER
ARHG6_679	sp|Q8K4I3|ARHG6_MOUSE	Q8K4I3	679	1	AYCTSASFQQGTRKDSVPQVLLPEEEKLIIE	S	V	P	Q	8	5	3	0.461893	0.237259	0.047789	0.13039	-0.236823	-0.127978	-0.25844	0.571088	STYX	0.128102	0.384199	0.0615563	0.889776	CENTER
ARHG6_763 764 765	sp|Q8K4I3|ARHG6_MOUSE	Q8K4I3	763 764 765	0.898	VRKLLKQTDECIRSESSSKTSILQ_______ RKLLKQTDECIRSESSSKTSILQ________ KLLKQTDECIRSESSSKTSILQ_________	S	S	S	K	7	5	2	-0.146373	-0.171508	-0.139901	0.0641085	0.363423	0.448594	NA	0.526737	STYX	-0.00605014	0.357195	0.487666	0.172959	CENTER
ARHG6_765	sp|Q8K4I3|ARHG6_MOUSE	Q8K4I3	765	0.993	KLLKQTDECIRSESSSKTSILQ_________	S	K	T	S	8	5	3	-0.145257	-0.544445	-0.315288	-0.0238153	0.371156	0.918874	0.306834	0.834174	STYX	-0.13153	0.115872	0.686627	0.0448616	CENTER
ARHG7_155	sp|Q9ES28|ARHG7_MOUSE	Q9ES28	155	0.992	SSHSRTSKLLQSQYRSLDMTDNTNSQLVVRA	S	L	D	M	6	4	2	0.142867	-0.00872799	0.321536	-0.00414956	NA	NA	-0.417352	0.0950971	STYX	0.112881	0.464895	-0.161127	0.650394	CENTER
ARHG7_228	sp|Q9ES28|ARHG7_MOUSE	Q9ES28	228	0.999	PSNYVREIKPSEKPVSPKSGTLKSPPKGFDT	S	P	K	S	8	5	3	0.58629	0.114013	-0.300152	0.00703895	0.181917	0.303497	0.445629	0.216204	STYX	0.117822	0.555992	0.321777	0.232187	CENTER
ARHG7_497	sp|Q9ES28|ARHG7_MOUSE	Q9ES28	497	0.999	LFPNLLLMLSASPRMSGFIYQGKLPTTGMTI	S	G	F	I	7	4	3	0.936999	-0.0203458	NA	-0.0192155	-0.751733	-0.206902	-0.351054	0.560465	STYX	0.0364262	0.675479	0.0008363	0.92899	CENTER
ARHG7_655	sp|Q9ES28|ARHG7_MOUSE	Q9ES28	655	0.998	LRPSAALCYKEDLSKSPKTMKKLLPKRKPER	S	P	K	T	7	4	3	-0.00426776	2.47439	0.323987	NA	-0.454926	0.307082	0.189432	0.526629	STYX	0.584796	0.585298	0.341048	0.216784	CENTER
ARHG7_673	sp|Q9ES28|ARHG7_MOUSE	Q9ES28	673	1	TMKKLLPKRKPERKPSDEEFAVRKSTAALEE	S	D	E	E	8	5	3	0.16145	-0.176795	-0.154158	-0.14443	-0.357143	0.392122	0.444319	0.592306	STYX	-0.134215	0.0423267	0.476249	0.102433	CENTER
ARHG7_776	sp|Q9ES28|ARHG7_MOUSE	Q9ES28	776	1	AHSYRMGSASRSRKESAPQVLLPEEEKIIVE	S	A	P	Q	5	2	3	NA	0.0241508	0.129043	NA	NA	-0.542082	-0.629514	-0.177772	STYX	0.0765971	0.665438	-0.449789	0.123598	CENTER
ARHG8_508	sp|Q9Z206|ARHG8_MOUSE	Q9Z206	508	0.999	FNCIRAAIAPFQRAASPLELQGLPDLHEECE	S	P	L	E	8	5	3	0.32669	0.228595	0.184283	0.453961	-0.0978676	0.00236178	-0.095567	0.0787326	STYX	0.219132	0.0868692	-0.00482418	0.986505	CENTER
ARHGA_1291	sp|Q8C033|ARHGA_MOUSE	Q8C033	1291	0.998	SVDSSLCDLLRDPSASPRSRPQGSRRARASS	S	P	R	S	8	5	3	0.13298	0.229789	0.271421	-0.00922961	-0.0525752	1.2705	1.14409	1.06512	STYX	0.114477	0.368555	1.1599	0.00667047	NR
ARHGA_284	sp|Q8C033|ARHGA_MOUSE	Q8C033	284	0.995	GIPRSFLRSSHKKQLSHDLTRFKAHCEEKMR	S	H	D	L	6	3	3	NA	-0.160164	-0.227268	0.645228	NA	-0.631974	-1.43407	-1.12305	STYX	0.0859322	0.52183	-1.06303	0.00936934	NR
ARHGA_34	sp|Q8C033|ARHGA_MOUSE	Q8C033	34	0.999	DTSNNEEEGELFDFDSGDEVPEADRQVPSAD	S	G	D	E	4	2	2	0.186652	0.257263	NA	NA	NA	NA	-0.215242	0.274644	STYX	0.221958	0.138347	0.0297009	0.924264	CENTER
ARHGA_355	sp|Q8C033|ARHGA_MOUSE	Q8C033	355	0.999	TKAAVKRGGSFIRTRSLVSQDHRCYFEEEQN	S	L	V	S	8	5	3	-0.289666	-0.40059	0.208662	-0.103721	0.394109	-0.124028	-0.475304	-0.499776	STYX	-0.0382412	0.432117	-0.366369	0.191147	CENTER
ARHGC_1327	sp|Q8R4H2|ARHGC_MOUSE	Q8R4H2	1327	0.998	QMSFKTGTGDIATCDSPRTSTESCAAQDSVI	S	P	R	T	5	2	3	0.173271	0.244609	NA	NA	NA	-0.224621	-0.290507	-0.543109	STYX	0.20894	0.155682	-0.352746	0.201894	CENTER
ARHGC_309	sp|Q8R4H2|ARHGC_MOUSE	Q8R4H2	309	0.999	WSSGDASRPSSDSADSPKSSLRERSYLEEAP	S	P	K	S	7	5	2	-0.447446	0.530145	0.216226	0.354845	0.275336	-0.459638	-1.44729	NA	STYX	0.185821	0.118756	-0.953463	0.0610625	NR
ARHGC_341	sp|Q8R4H2|ARHGC_MOUSE	Q8R4H2	341	0.994	RSEGVQDAEPQSLVGSPSTRGAPHIIGAEDD	S	P	S	T	7	4	3	NA	0.111272	0.275915	-0.0597397	0.15749	-0.053371	0.0369478	-0.199628	STYX	0.121234	0.351667	-0.0720172	0.799409	CENTER
ARHGC_736	sp|Q8R4H2|ARHGC_MOUSE	Q8R4H2	736	1	VQEEECEVERVAEHGTPKPFRKFDSIAFGES	T	P	K	P	7	4	3	-0.180325	-0.0762794	-0.111925	0.248888	NA	-1.21024	-1.21821	-1.23977	STYX	-0.0299104	0.305019	-1.22274	0.00442487	NR
ARHGH_170	sp|Q80U35|ARHGH_MOUSE	Q80U35	170	1	RVSWEPPTRDPRQPPTPPPRTCFPLAGLRSA	T	P	P	P	8	5	3	0.232504	0.501963	-0.062112	0.300661	0.203034	-0.00111485	-0.330259	-0.621565	STYX	0.23521	0.0637793	-0.317646	0.27516	CENTER
ARHGH_414	sp|Q80U35|ARHGH_MOUSE	Q80U35	414	0.984	WSSRSSVGWGVYRSPSFGTGDGLLLRPQTRS	S	F	G	T	7	4	3	-0.027215	-0.121046	0.0684473	NA	-0.468257	-1.02421	-0.692949	-0.61792	STYX	-0.137018	0.1431	-0.778358	0.0199733	CENTER
ARHGH_516	sp|Q80U35|ARHGH_MOUSE	Q80U35	516	0.997	SAGSPMEQSESTLSQSPTSPTTRPTLKDLTA	S	P	T	S	4	2	2	-0.398033	0.0360997	NA	NA	NA	0.175104	NA	0.218546	STYX	-0.180967	0.260879	0.196825	0.511748	CENTER
ARI1A_1185	sp|A2BH40|ARI1A_MOUSE	A2BH40	1185	0.995	PHSQIPPLPGMSRSNSVGIQDAFPDGSDPTF	S	V	G	I	7	5	2	-0.407877	0.155188	-0.0439413	0.197361	0.165951	-0.832751	NA	-0.799393	STYX	0.0133363	0.864116	-0.816072	0.0461451	CENTER
ARI1A_1600 1601	sp|A2BH40|ARI1A_MOUSE	A2BH40	1600 1601	0.879	QVSSPAPLPRPMENRTSPSKSPFLHSGMKMQ VSSPAPLPRPMENRTSPSKSPFLHSGMKMQK	T	S	P	S	5	3	2	0.281902	-0.124891	0.247843	NA	NA	-0.068509	NA	-0.599784	STYX	0.134951	0.469336	-0.334147	0.357689	CENTER
ARI1A_1600 1601 1605	sp|A2BH40|ARI1A_MOUSE	A2BH40	1600 1601 1605	0.895	QVSSPAPLPRPMENRTSPSKSPFLHSGMKMQ VSSPAPLPRPMENRTSPSKSPFLHSGMKMQK APLPRPMENRTSPSKSPFLHSGMKMQKAGPP	T	S	P	S	6	3	3	0.363965	-0.00345978	0.0951797	NA	NA	0.370631	0.348456	0.719209	STYX	0.151895	0.365465	0.479432	0.107389	CENTER
ARI1A_1601	sp|A2BH40|ARI1A_MOUSE	A2BH40	1601	0.986	VSSPAPLPRPMENRTSPSKSPFLHSGMKMQK	S	P	S	K	5	2	3	0.0448943	-0.101817	NA	NA	NA	-0.0600875	-0.263466	-0.403156	STYX	-0.0284612	0.536601	-0.242236	0.371803	CENTER
ARI1A_1869	sp|A2BH40|ARI1A_MOUSE	A2BH40	1869	0.855	QTHFESKIELLPSRPYVPCPTPPRKHLTTVE	Y	V	P	C	5	2	3	0.200829	-0.0129382	NA	NA	NA	0.315571	-0.22958	-0.357903	STYX	0.0939455	0.649451	-0.0906373	0.731578	CENTER
ARI1A_1942	sp|A2BH40|ARI1A_MOUSE	A2BH40	1942	0.999	SAEATKESSKFPFGISPAQSHRNIKILEDEP	S	P	A	Q	4	2	2	0.188041	0.312772	NA	NA	NA	NA	-0.250162	-0.385886	STYX	0.250406	0.11594	-0.318024	0.332102	CENTER
ARI1A_301 302	sp|A2BH40|ARI1A_MOUSE	A2BH40	301 302	0.865	GTPQPTATPTLNQLLTSPSSARGYQGYPGGD TPQPTATPTLNQLLTSPSSARGYQGYPGGDY	T	S	P	S	6	4	2	NA	0.173211	-0.0752244	-3.23111	-0.0748362	-0.0892725	-0.224359	NA	STYX	-0.80199	0.212056	-0.156816	0.632458	CENTER
ARI1A_302	sp|A2BH40|ARI1A_MOUSE	A2BH40	302	0.994	TPQPTATPTLNQLLTSPSSARGYQGYPGGDY	S	P	S	S	7	4	3	0.149405	0.230408	NA	0.35888	-0.156733	-0.044534	-0.477188	0.00273808	STYX	0.14549	0.324411	-0.172995	0.54734	CENTER
ARI1A_365	sp|A2BH40|ARI1A_MOUSE	A2BH40	365	0.998	AVSGGAQQRSHHAPMSPGSSGGGGQPLARTP	S	P	G	S	5	3	2	-0.57317	-0.516539	NA	NA	0.634553	NA	-0.241001	-0.250193	STYX	-0.151719	0.301686	-0.245597	0.447288	CENTER
ARI1A_382 383 384	sp|A2BH40|ARI1A_MOUSE	A2BH40	382 383 384	0.892	GSSGGGGQPLARTPQSSSPMDQMGKMRPQPY SSGGGGQPLARTPQSSSPMDQMGKMRPQPYG SGGGGQPLARTPQSSSPMDQMGKMRPQPYGG	S	S	S	P	7	4	3	1.02317	NA	-0.181803	-0.0458658	0.0804425	-0.0453633	-0.00593126	0.267861	STYX	0.218986	0.953602	0.0721887	0.767157	CENTER
ARI1A_384	sp|A2BH40|ARI1A_MOUSE	A2BH40	384	0.995	SGGGGQPLARTPQSSSPMDQMGKMRPQPYGG	S	P	M	D	7	4	3	0.500083	0.13463	-0.0249948	-0.091903	NA	-0.266536	-0.109585	-0.229472	STYX	0.129454	0.67421	-0.201864	0.447937	CENTER
ARI1A_697	sp|A2BH40|ARI1A_MOUSE	A2BH40	697	0.992	FSPHTSPHLPGIRGPSPSPVGSPASVAQSRS	S	P	S	P	8	5	3	-0.502142	-0.0734903	0.106971	0.00852614	-0.0727072	-0.0409719	-0.342954	-0.235314	STYX	-0.106568	0.190156	-0.206413	0.440216	CENTER
ARI1A_699	sp|A2BH40|ARI1A_MOUSE	A2BH40	699	0.999	PHTSPHLPGIRGPSPSPVGSPASVAQSRSGP	S	P	V	G	5	3	2	-0.158744	-0.378548	-0.0797247	NA	NA	NA	-0.136876	-0.119464	STYX	-0.205672	0.0311382	-0.12817	0.697504	CENTER
ARI1A_703	sp|A2BH40|ARI1A_MOUSE	A2BH40	703	0.998	PHLPGIRGPSPSPVGSPASVAQSRSGPLSPA	S	P	A	S	6	4	2	-0.129245	-0.214781	-0.0278196	NA	0.0980472	NA	-0.0794959	-0.370254	STYX	-0.0684497	0.205266	-0.224875	0.497421	CENTER
ARI1A_770	sp|A2BH40|ARI1A_MOUSE	A2BH40	770	0.966	QRNPQMPQYTSPQPGSALSPRQPSGGQMHSG	S	A	L	S	7	5	2	-0.438776	0.150758	0.00951185	0.510185	-0.227023	NA	-0.113164	0.218942	STYX	0.00093119	0.664304	0.0528889	0.849015	CENTER
ARI1A_773	sp|A2BH40|ARI1A_MOUSE	A2BH40	773	0.994	PQMPQYTSPQPGSALSPRQPSGGQMHSGVGS	S	P	R	Q	8	5	3	-0.034684	0.0365703	-0.0679135	0.0939777	-0.152111	-0.196413	-0.173353	-0.46746	STYX	-0.0248321	0.369604	-0.279075	0.304889	CENTER
ARI1B_1563	sp|E9Q4N7|ARI1B_MOUSE	E9Q4N7	1563	0.997	APSPASFQRSLESRMSPSKSPFLPTMKMQKV	S	P	S	K	8	5	3	0.277349	-0.0667003	-0.391052	-0.198806	-0.349748	-0.687801	-0.818023	-1.13031	STYX	-0.145791	0.0621803	-0.87871	0.013003	NR
ARI1B_1565	sp|E9Q4N7|ARI1B_MOUSE	E9Q4N7	1565	0.985	SPASFQRSLESRMSPSKSPFLPTMKMQKVMP	S	K	S	P	4	2	2	NA	NA	NA	-0.0162869	-0.252109	NA	-0.616569	-0.833834	STYX	-0.134198	0.189192	-0.725202	0.0645805	CENTER
ARI1B_1567	sp|E9Q4N7|ARI1B_MOUSE	E9Q4N7	1567	0.989	ASFQRSLESRMSPSKSPFLPTMKMQKVMPTV	S	P	F	L	6	4	2	0.37709	-0.2743	NA	0.159036	-0.329616	-1.03544	NA	-0.991284	STYX	-0.0169474	0.649777	-1.01336	0.0281752	NR
ARI1B_454	sp|E9Q4N7|ARI1B_MOUSE	E9Q4N7	454	0.999	SPAWAAAQQRSHPAMSPGTPGPTMGRSQGSP	S	P	G	T	8	5	3	-0.521539	0.571697	0.140809	0.165574	0.20493	-0.145362	-0.265635	-0.0669942	STYX	0.112294	0.273962	-0.15933	0.553409	CENTER
ARI3A_339	sp|Q62431|ARI3A_MOUSE	Q62431	339	0.99	MKYLYPYECERRGLSSPNELQAAIDSNRREG	S	P	N	E	7	4	3	-0.0576907	-0.0682214	-0.158173	-0.225362	NA	0.675533	-0.362623	0.802859	STYX	-0.127362	0.0372607	0.371923	0.308622	CENTER
ARI3A_78	sp|Q62431|ARI3A_MOUSE	Q62431	78	0.997	LAAMRAAAAGLGHPSSPGGSEDGPPISGDED	S	P	G	G	4	2	2	-0.805162	-0.147281	NA	NA	NA	NA	0.34131	-0.0119671	STYX	-0.476222	0.0382793	0.164672	0.608188	CENTER
ARI3B_385 386	sp|Q9Z1N7|ARI3B_MOUSE	Q9Z1N7	385 386	0.898	RFSILGLGSSSGTSASSPRIPPASTLRKGDG FSILGLGSSSGTSASSPRIPPASTLRKGDGV	S	S	P	R	6	3	3	0.16311	0.0422977	-0.341686	NA	NA	0.262061	-0.0591729	0.90318	STYX	-0.0454262	0.699833	0.368689	0.274514	CENTER
ARI4A_867	sp|F8VPQ2|ARI4A_MOUSE	F8VPQ2	867	1	YEKEKKLKRKILGQQSPEKKLRLDNGMEMTT	S	P	E	K	8	5	3	0.483266	-0.158341	-0.287337	-0.213635	-0.0729729	-0.643328	-0.846221	-1.12637	STYX	-0.049804	0.115968	-0.871973	0.0137846	NR
ARI4B_675	sp|A2CG63|ARI4B_MOUSE	A2CG63	675	0.999	CKLRRLSKSPFQSNPSPEMVSKLDLADAKNS	S	P	E	M	8	5	3	0.548079	-0.119139	-0.0293053	-0.130732	-0.0938545	-0.348177	-0.301254	-0.150567	STYX	0.0350097	0.353368	-0.266666	0.316309	CENTER
ARI4B_778	sp|A2CG63|ARI4B_MOUSE	A2CG63	778	0.996	NKVHTDLVIAKTVSKSPERLRKDMEAISEDT	S	P	E	R	7	5	2	-1.87865	1.82157	-0.0755004	0.0581281	0.173475	NA	2.69483	0.58342	STYX	0.0198044	0.909097	1.63913	0.0460735	NR
ARI4B_837	sp|A2CG63|ARI4B_MOUSE	A2CG63	837	0.903	KRGKRRYCSADECLQTGSPGKKEDRTKSKEP	T	G	S	P	5	3	2	NA	NA	-0.246834	-0.133747	0.0467564	NA	0.266665	-0.446291	STYX	-0.111275	0.149386	-0.0898128	0.810588	CENTER
ARI4B_839	sp|A2CG63|ARI4B_MOUSE	A2CG63	839	0.998	GKRRYCSADECLQTGSPGKKEDRTKSKEPLC	S	P	G	K	8	5	3	0.176395	0.130323	-0.112453	-0.577542	0.0873854	-0.143922	-0.0814361	-0.366339	STYX	-0.0591784	0.73195	-0.197232	0.46475	CENTER
ARI5B_1032	sp|Q8BM75|ARI5B_MOUSE	Q8BM75	1032	1	EDLDLVIAGKKARAVSPLDPAKEASGKEKAS	S	P	L	D	8	5	3	0.374156	-0.339534	-0.302675	-0.332235	-0.260235	-0.579812	-0.892773	-0.718882	STYX	-0.172105	0.0296168	-0.730489	0.023418	CENTER
ARI5B_264	sp|Q8BM75|ARI5B_MOUSE	Q8BM75	264	0.997	KGRPRKKKTCPQRRDSFSGSKDPNNNCDGKV	S	F	S	G	6	4	2	-0.857199	0.81706	-0.0193192	NA	-0.10965	-0.754104	NA	-0.554446	STYX	-0.0422771	0.456239	-0.654275	0.0826845	CENTER
ARID2_631	sp|E9Q7E2|ARID2_MOUSE	E9Q7E2	631	0.997	PISTPVVRVDAVADLSPTPSPAGIPHGPQAA	S	P	T	P	8	5	3	0.0324267	0.0629637	0.0786371	0.110833	0.124267	0.0412619	0.104145	-0.116199	STYX	0.0818254	0.415614	0.00973572	0.939834	CENTER
ARIP4_1168	sp|Q99NG0|ARIP4_MOUSE	Q99NG0	1168	0.997	SSPKAPDPEGLARPVSPDSPEIISELQQYAD	S	P	D	S	4	2	2	0.665159	0.207057	NA	NA	NA	NA	-0.383391	0.267535	STYX	0.436108	0.0644622	-0.0579281	0.874884	CENTER
ARK72_40	sp|Q8CG76|ARK72_MOUSE	Q8CG76	40	0.999	GRPLAMSRPPPPRAASGAPLRPATVLGTMEM	S	G	A	P	8	5	3	0.228961	-0.294309	-0.108494	-0.0367271	-0.17373	-0.077642	-0.728957	-0.499276	STYX	-0.0768598	0.137781	-0.435292	0.148783	CENTER
ARL3_46	sp|Q9WUL7|ARL3_MOUSE	Q9WUL7	46	0.997	TTLLKQLASEDISHITPTQGFNIKSVQSQGF	T	P	T	Q	8	5	3	0.280917	0.270989	-0.0243308	-0.095693	-0.377106	0.843584	0.494916	0.761355	STYX	0.0109554	0.793511	0.699951	0.0348951	CENTER
ARL3_48	sp|Q9WUL7|ARL3_MOUSE	Q9WUL7	48	0.995	LLKQLASEDISHITPTQGFNIKSVQSQGFKL	T	Q	G	F	5	3	2	NA	0.24288	-0.0788843	NA	-0.287271	NA	0.5363	0.639062	STYQ	-0.0410918	0.465976	0.587681	0.120021	CENTER
ARL3_5	sp|Q9WUL7|ARL3_MOUSE	Q9WUL7	5	1	___________MGLLSILRKLKSAPDQEVRI	S	I	L	R	4	2	2	0.538111	-1.18015	NA	NA	NA	NA	0.542504	0.953996	STYX	-0.321022	0.900497	0.74825	0.0775706	CENTER
ARM10_43	sp|Q9D0L7|ARM10_MOUSE	Q9D0L7	43	0.999	TRGPRRGGRRLRPSRSAEDLTDGSYDDILNA	S	A	E	D	8	5	3	0.480733	0.456101	0.479528	-0.0613417	-0.167904	-0.197082	-0.331707	0.0894563	STYX	0.237423	0.266092	-0.146444	0.594016	CENTER
ARM12_47	sp|Q80X86|ARM12_MOUSE	Q80X86	47	0.991	YKAVRTGLKCHPPLCSNSPICIARLAIERER	S	N	S	P	5	3	2	NA	0.166916	0.40199	0.179166	NA	-0.0978824	-0.509379	NA	STYX	0.249357	0.0668325	-0.303631	0.383768	CENTER
ARMC2_148	sp|Q3URY6|ARMC2_MOUSE	Q3URY6	148	0.991	RFYRAASQGMLLPDRSPPAAHSKTVDESSKP	S	P	P	A	7	4	3	0.288229	0.0699975	-0.101411	-0.184847	NA	-0.129852	0.20622	-0.128987	STYX	0.0179918	0.693256	-0.0175396	0.967417	CENTER
ARMC3_281	sp|A2AU72|ARMC3_MOUSE	A2AU72	281	0.999	TMVLMQQTGSLKKVLSFAESSTIPDIQKNAA	S	F	A	E	6	3	3	0.161215	-0.206608	NA	-0.138034	NA	0.725879	1.12532	1.07439	STYX	-0.0611424	0.31181	0.975199	0.0120448	NR
ARMC3_611	sp|A2AU72|ARMC3_MOUSE	A2AU72	611	0.995	NDQRAILLVNNKSDTSPPPSMEDKSSDVGYG	S	P	P	P	6	4	2	0.0629718	-0.0682596	0.0584669	NA	-0.179756	0.019767	NA	0.532219	STYX	-0.0316443	0.416205	0.275993	0.440854	CENTER
ARMC3_649	sp|A2AU72|ARMC3_MOUSE	A2AU72	649	0.998	SLRRGSKEKANAIFGSPTEEKSEPASVRNTI	S	P	T	E	8	5	3	0.523661	0.0950913	0.322469	-0.0463376	0.111031	0.468497	0.77071	0.441645	STYX	0.201183	0.145525	0.560284	0.0692549	CENTER
ARMC4_353	sp|B2RY50|ARMC4_MOUSE	B2RY50	353	0.998	AGSEKSKIEKISFGKSPMTKRLEPSLNWRVT	S	P	M	T	8	5	3	-0.121531	-0.57257	-0.33646	0.475865	-0.144469	1.17046	1.04147	1.27853	STYX	-0.139833	0.0681995	1.16349	0.00664897	NR
ARMT1_41	sp|A6H630|ARMT1_MOUSE	A6H630	41	1	PQILTKVIDTLHRHKSEFFEKHGEEGIEAEK	S	E	F	F	6	3	3	0.188634	NA	-0.0889666	NA	-0.770011	1.18339	1.21598	1.18945	STYX	-0.223448	0.330458	1.19627	0.00603965	NR
ARMX2_104	sp|Q6A058|ARMX2_MOUSE	Q6A058	104	0.999	NLATTVAEEVAPAAPSPKVQNGAESKVQELN	S	P	K	V	8	5	3	-0.2745	0.256808	-0.0224672	0.369373	0.241834	-1.04357	-0.940063	-0.945859	STYX	0.11421	0.441215	-0.976499	0.00818348	NR
ARP10_414	sp|Q9QZB7|ARP10_MOUSE	Q9QZB7	414	0.975	FDVGKAQPPLMKRAFSTEK____________	S	T	E	K	7	4	3	0.20487	-0.669542	-0.129041	0.25746	NA	-0.494428	-0.574765	-0.500203	STYX	-0.0840633	0.736897	-0.523132	0.0683179	CENTER
ARP10_414 415	sp|Q9QZB7|ARP10_MOUSE	Q9QZB7	414 415	0.897	FDVGKAQPPLMKRAFSTEK____________ DVGKAQPPLMKRAFSTEK_____________	S	T	E	K	8	5	3	0.206983	-0.636755	-0.0333242	0.117828	0.219367	-0.210878	-0.850533	-0.634962	STYX	-0.0251802	0.842104	-0.565458	0.0721292	CENTER
ARP19_62	sp|P56212|ARP19_MOUSE,sp|P60840|ENSA_MOUSE	P56212	62	0.995	DFLRKRLQKGQKYFDSGDYNMAKAKMKNKQL	S	G	D	Y	5	3	2	0.28214	-0.439954	NA	NA	0.204801	NA	-0.318242	-0.402266	STYX	0.0156625	0.745705	-0.360254	0.274377	CENTER
ARP2_117	sp|P61161|ARP2_MOUSE	P61161	117	0.998	TRNCKILLTEPPMNPTKNREKIVEVMFETYQ	T	K	N	R	4	2	2	NA	0.0908215	0.0382904	NA	NA	NA	-0.520031	-0.112146	STYX	0.064556	0.720905	-0.316089	0.363713	CENTER
ARP5L_64	sp|Q9D898|ARP5L_MOUSE	Q9D898	64	0.998	RQGDMLRAFHAALRNSPINTKNQAVKERAQG	S	P	I	N	8	5	3	0.0429141	0.129532	-0.157189	0.133154	-0.469461	0.480727	0.370868	0.0383933	STYX	-0.0642101	0.511546	0.296663	0.285706	CENTER
ARP8_132	sp|Q8R2S9|ARP8_MOUSE	Q8R2S9	132	0.998	IWSKKMSNGTRRIPVSPEQTRSYNKQMRPAI	S	P	E	Q	8	5	3	0.40781	-0.319225	-0.0107244	-0.0475318	0.40296	-0.0544281	0.0312329	-0.059544	STYX	0.0866578	0.875367	-0.0275797	0.937707	CENTER
ARPC5_77	sp|Q9CPW4|ARPC5_MOUSE	Q9CPW4	77	1	PPINTKSQAVKDRAGSIVLKVLISFKANDIE	S	I	V	L	6	3	3	0.768101	-0.232449	NA	0.216822	NA	-0.297664	-0.406089	-0.365482	STYX	0.250824	0.478334	-0.356411	0.18478	CENTER
ARRB1_412	sp|Q8BWG8|ARRB1_MOUSE	Q8BWG8	412	0.997	KGMKDDKDEEDDGTGSPHLNNR_________	S	P	H	L	8	5	3	-0.786102	0.216262	-0.00996086	0.224983	0.146834	-0.403139	-0.50615	0.0165804	STYX	-0.0415967	0.70793	-0.29757	0.291783	CENTER
ARVC_205	sp|P98203|ARVC_MOUSE	P98203	205	0.994	GFPDGPESRDIPSYGSLSRGLGVRPPRTGLL	S	L	S	R	6	4	2	0.217711	-0.357388	NA	-0.237614	0.183878	-0.0679606	NA	-0.546378	STYX	-0.0483533	0.578154	-0.30717	0.386456	CENTER
ARVC_345	sp|P98203|ARVC_MOUSE	P98203	345	0.996	PERGSLGSLDRVVRRSPSVDSTRKEPRWRDP	S	P	S	V	7	5	2	-0.350051	-0.0486984	0.152285	-0.121638	-0.206458	0.11386	NA	-0.953412	STYX	-0.114912	0.0775347	-0.419776	0.38529	CENTER
ARVC_643	sp|P98203|ARVC_MOUSE	P98203	643	1	FHQGKKDAEMDRNFDTLDLPKRTEAAKGFEL	T	L	D	L	5	2	3	1.07395	-0.297172	NA	NA	NA	-0.661983	-0.617746	0.0190566	STYX	0.388388	0.928817	-0.420224	0.170884	CENTER
ASAP1_1045	sp|Q9QWY8|ASAP1_MOUSE	Q9QWY8	1045	0.999	QPPSEVTQRSHTGDLSPNVQSRDAIQKQASE	S	P	N	V	8	5	3	-0.43463	-0.433038	-0.266761	-0.0321104	0.482742	0.898095	0.776479	0.293264	STYX	-0.13676	0.0876159	0.655946	0.0512487	CENTER
ASAP1_1059	sp|Q9QWY8|ASAP1_MOUSE	Q9QWY8	1059	0.997	LSPNVQSRDAIQKQASEDSNDLTPTLPETPV	S	E	D	S	8	5	3	0.13841	0.0790369	0.354652	0.271734	-0.279696	0.263302	-0.870872	-0.269494	STYX	0.112827	0.346163	-0.292355	0.400448	CENTER
ASAP1_1072	sp|Q9QWY8|ASAP1_MOUSE	Q9QWY8	1072	0.999	QASEDSNDLTPTLPETPVPLPRKINTGKNKV	T	P	V	P	8	5	3	0.664251	-0.0930284	0.261648	0.324923	-0.151724	0.452025	0.00741328	0.491281	STYX	0.201214	0.389598	0.316906	0.267471	CENTER
ASAP1_732	sp|Q9QWY8|ASAP1_MOUSE	Q9QWY8	732	0.999	HVEYEWNLRQDEMDESDDDLDDKPSPIKKER	S	D	D	D	5	2	3	-0.179935	-0.211724	NA	NA	NA	0.126388	0.683319	1.05306	STYX	-0.195829	0.0526263	0.620922	0.0784654	CENTER
ASAP1_854	sp|Q9QWY8|ASAP1_MOUSE	Q9QWY8	854	0.994	KKRPPPPPPGHKRTLSDPPSPLPHGPPNKGA	S	D	P	P	5	2	3	0.19003	-0.0558881	NA	NA	NA	-0.0302886	0.0766638	-0.395264	STYX	0.0670708	0.85338	-0.116296	0.68828	CENTER
ASAP1_858	sp|Q9QWY8|ASAP1_MOUSE	Q9QWY8	858	0.999	PPPPPGHKRTLSDPPSPLPHGPPNKGAIPWG	S	P	L	P	8	5	3	0.0275902	-0.0251933	-0.0321749	0.0224269	-0.124746	0.465928	0.143928	0.689847	STYX	-0.0264194	0.339943	0.433234	0.147247	CENTER
ASAP3_867	sp|Q5U464|ASAP3_MOUSE	Q5U464	867	0.992	ESTRSYRRGGRSLEDSPSARQPLCSRRHIPV	S	P	S	A	7	5	2	-0.12788	-0.10262	0.0277457	0.108242	-0.0830127	0.575057	NA	0.650549	STYX	-0.0355047	0.26958	0.612803	0.109842	CENTER
ASB3_35	sp|Q9WV72|ASB3_MOUSE	Q9WV72	35	1	EGNVKILRKLLKKGRSVDVADNRGWMPIHEA	S	V	D	V	7	4	3	-0.240302	-0.000910504	-0.14822	0.0758785	NA	0.614877	0.351085	0.589551	STYX	-0.0783884	0.19546	0.518504	0.0838735	CENTER
ASCC1_63	sp|Q9D8Z1|ASCC1_MOUSE	Q9D8Z1	63	0.996	AYEVAQTPHGFRATVSAPSLLYKHIVGKRGD	S	A	P	S	7	4	3	0.514943	-0.842973	NA	-0.472121	-0.033139	-0.114626	-0.118495	-0.138008	STYX	-0.208323	0.236958	-0.12371	0.648094	CENTER
ASGL1_183	sp|Q8C0M9|ASGL1_MOUSE	Q8C0M9	183	1	EKLEKGAQNADCPKNSGTVGAVALDCRGNLA	S	G	T	V	7	4	3	-1.60472	1.94186	0.0702176	NA	0.403978	1.99729	1.62722	1.04102	STYX	0.202833	0.390026	1.55517	0.00461425	NR
ASH1L_1678	sp|Q99MY8|ASH1L_MOUSE	Q99MY8	1678	0.992	ASDKPSQRSSESTNCSPTRKRSSSESTSSTV	S	P	T	R	5	2	3	-0.683782	6.64	NA	NA	NA	-0.331293	-0.388648	-0.892921	STYX	2.97811	0.986869	-0.53762	0.0812495	NR
ASH2L_618	sp|Q91X20|ASH2L_MOUSE	Q91X20	618	1	ADVLYHVETEVDGRRSPPWEP__________	S	P	P	W	6	3	3	0.900571	-0.0793526	-0.0476198	NA	NA	-0.186511	-0.321529	0.638385	STYX	0.257866	0.907553	0.0434481	0.972854	CENTER
ASHWN_150	sp|Q922M7|ASHWN_MOUSE	Q922M7	150	0.999	TSDAFWKSPNSSSRISPLVLFSNLPVNHKME	S	P	L	V	4	2	2	0.872402	-0.0928257	NA	NA	NA	0.231898	0.118075	NA	STYX	0.389788	0.609908	0.174986	0.558408	CENTER
ASHWN_189	sp|Q922M7|ASHWN_MOUSE	Q922M7	189	0.997	NHDLMNRKSPSGPVKSPPLSPVGTTPVKLKR	S	P	P	L	7	4	3	NA	0.116832	-0.197187	-0.237906	-0.216648	0.21043	-0.132152	-0.083703	STYX	-0.133728	0.0660967	-0.00180846	0.981599	CENTER
ASHWN_193	sp|Q922M7|ASHWN_MOUSE	Q922M7	193	0.998	MNRKSPSGPVKSPPLSPVGTTPVKLKRAAPK	S	P	V	G	5	3	2	0.412752	0.0358453	-0.209617	NA	NA	NA	-0.507969	-0.104639	STYX	0.0796602	0.966245	-0.306304	0.377805	CENTER
ASHWN_230	sp|Q922M7|ASHWN_MOUSE	Q922M7	230	1	NHLKPPEVKRKIQHVTWP_____________	T	W	P	_	6	3	3	1.14467	-0.858831	NA	0.424337	NA	0.249538	0.154923	0.610288	STYX	0.236723	0.413305	0.33825	0.232187	CENTER
ASPC1_165	sp|Q8VBT9|ASPC1_MOUSE	Q8VBT9	165	0.985	ALQNTTLQSLGLTGGSATIRFVIKQCDTAGK	S	A	T	I	7	5	2	0.336169	-0.464061	0.252139	0.243292	-0.0623	NA	-0.158113	0.265747	STYX	0.0610478	0.591179	0.0538168	0.858136	CENTER
ASPC1_193	sp|Q8VBT9|ASPC1_MOUSE	Q8VBT9	193	0.999	AGKQESIAVRSKAPGSPVSSLSADQASSSTL	S	P	V	S	8	5	3	0.0496415	0.185623	0.142981	0.123966	0.0179494	0.205006	0.114796	0.325414	STYX	0.104032	0.293827	0.215072	0.394482	CENTER
ASPC1_278 279	sp|Q8VBT9|ASPC1_MOUSE	Q8VBT9	278 279	0.894	GGQRLGGPSASLRPLTSPSANSSKSFSGPGG GQRLGGPSASLRPLTSPSANSSKSFSGPGGP	T	S	P	S	8	5	3	-0.137729	0.420586	-0.224773	-0.24314	-0.0438144	0.622826	0.36602	0.559785	STYX	-0.045774	0.14993	0.51621	0.0848599	CENTER
ASPC1_279	sp|Q8VBT9|ASPC1_MOUSE	Q8VBT9	279	0.995	GQRLGGPSASLRPLTSPSANSSKSFSGPGGP	S	P	S	A	8	5	3	-0.284193	0.177151	-0.387024	-0.285523	-0.0201805	0.659645	0.700235	0.757633	STYX	-0.159954	0.0594585	0.705838	0.0315589	CENTER
ASPC1_281	sp|Q8VBT9|ASPC1_MOUSE	Q8VBT9	281	0.956	RLGGPSASLRPLTSPSANSSKSFSGPGGPSK	S	A	N	S	4	2	2	NA	0.118265	-0.436891	NA	NA	0.182323	NA	0.658255	STYX	-0.159313	0.454368	0.420289	0.250808	CENTER
ASPC1_496	sp|Q8VBT9|ASPC1_MOUSE	Q8VBT9	496	0.995	TADVLVARCMSRASGSPPLLPAPDPVSLESE	S	P	P	L	8	5	3	-0.0327973	0.266153	0.128431	0.130458	-0.0159598	0.628397	0.384988	0.377443	STYX	0.095257	0.459359	0.463609	0.111687	CENTER
ASPC1_535	sp|Q8VBT9|ASPC1_MOUSE	Q8VBT9	535	1	GPPEPIQGTAQPVKRSLGKVPKWLKLPASKR	S	L	G	K	5	3	2	NA	-0.349649	NA	0.24914	0.0808717	NA	-0.811206	-0.991562	STYX	-0.00654581	0.958785	-0.901384	0.037342	NR
ASPP1_679	sp|Q62415|ASPP1_MOUSE	Q62415	679	0.999	LPRPLSPTKLTPIVHSPLRYQSDADLEALRR	S	P	L	R	5	2	3	0.718824	-0.412958	NA	NA	NA	0.808079	0.0539477	0.10774	STYX	0.152933	0.987261	0.323256	0.309576	CENTER
ASPP2_479	sp|Q8CG79|ASPP2_MOUSE	Q8CG79	479	0.976	QCAAPPSFGTLRKNQSSEDILRDAQAVNKNV	S	S	E	D	6	3	3	0.33336	-0.166985	0.0348043	NA	NA	-1.10174	-0.329616	-1.20081	STYX	0.0670598	0.966671	-0.87739	0.0226126	NR
ASPP2_479 480	sp|Q8CG79|ASPP2_MOUSE	Q8CG79	479 480	0.858	QCAAPPSFGTLRKNQSSEDILRDAQAVNKNV CAAPPSFGTLRKNQSSEDILRDAQAVNKNVA	S	S	E	D	7	4	3	NA	-0.311313	-0.458083	0.661029	-0.119516	-0.971391	-0.63274	-0.446378	STYX	-0.0569707	0.175553	-0.683503	0.0342774	CENTER
ASPP2_735 736	sp|Q8CG79|ASPP2_MOUSE	Q8CG79	735 736	0.885	LRKKLSNAPRPLKKRSSITEPEGPNGPNIQK RKKLSNAPRPLKKRSSITEPEGPNGPNIQKL	S	S	I	T	4	2	2	NA	0.00925911	NA	NA	-0.0511951	-0.640195	NA	-0.804742	STYX	-0.020968	0.566141	-0.722469	0.0643677	CENTER
ASTRA_11 12	sp|Q8VEF1|ASTRA_MOUSE	Q8VEF1	11 12	0.872	_____MFDTTPHSGRSSPSSSPSLRKRLQLL ____MFDTTPHSGRSSPSSSPSLRKRLQLLP	S	S	P	S	4	2	2	0.0494872	NA	0.860903	NA	NA	-0.246374	NA	-0.548013	STYX	0.455195	0.202027	-0.397194	0.24892	CENTER
ASTRA_12	sp|Q8VEF1|ASTRA_MOUSE	Q8VEF1	12	0.988	____MFDTTPHSGRSSPSSSPSLRKRLQLLP	S	P	S	S	5	2	3	-0.369474	0.144216	NA	NA	NA	-0.321301	-0.528138	-0.222986	STYX	-0.112629	0.534552	-0.357475	0.193518	CENTER
ASTRA_16	sp|Q8VEF1|ASTRA_MOUSE	Q8VEF1	16	0.991	MFDTTPHSGRSSPSSSPSLRKRLQLLPPIRP	S	P	S	L	4	2	2	0.0338884	0.676094	NA	NA	NA	-0.530319	NA	-0.796964	STYX	0.354991	0.245442	-0.663642	0.0825397	CENTER
ASTRA_269	sp|Q8VEF1|ASTRA_MOUSE	Q8VEF1	269	0.998	SDISPSGAADHSQEPSPVGSRRGRVTPNLSR	S	P	V	G	7	5	2	-0.0252918	0.171285	0.319901	0.497281	0.081095	NA	-0.515911	-0.43176	STYX	0.208854	0.105393	-0.473835	0.168258	CENTER
ASTRA_279	sp|Q8VEF1|ASTRA_MOUSE	Q8VEF1	279	0.997	HSQEPSPVGSRRGRVTPNLSRASSDADHGAE	T	P	N	L	8	5	3	-0.773678	-0.398594	0.112138	0.102056	0.11018	-0.510705	-0.56556	-0.296571	STYX	-0.169579	0.43711	-0.457612	0.106226	CENTER
ASTRB_21	sp|Q80TI0|ASTRB_MOUSE	Q80TI0	21	0.998	LSCTASNSNRSTPACSPILRKRSRSPTPQNQ	S	P	I	L	8	5	3	-0.36195	-0.289398	0.0304496	0.263643	-0.165953	-0.374287	-0.714387	-0.949527	STYX	-0.104641	0.14564	-0.6794	0.0363378	CENTER
ASTRB_274	sp|Q80TI0|ASTRB_MOUSE	Q80TI0	274	0.999	NDSSSKSSIETKPDASPQLPKKSITNSTLTS	S	P	Q	L	8	5	3	0.639111	0.0121945	-0.0801238	-0.223196	-0.0804017	-0.568554	-0.461628	-0.61757	STYX	0.0535166	0.448869	-0.549251	0.0590053	CENTER
ASTRB_30	sp|Q80TI0|ASTRB_MOUSE	Q80TI0	30	0.994	RSTPACSPILRKRSRSPTPQNQDGDTMVEKG	S	P	T	P	6	3	3	-0.618282	0.127132	0.279375	NA	NA	-1.03974	-1.99894	-0.543827	STYX	-0.0705916	0.921555	-1.19417	0.0114907	NR
ASTRB_550	sp|Q80TI0|ASTRB_MOUSE	Q80TI0	550	0.999	LTKTESTYLAEIHRQSPKEKASKSSAVRRRK	S	P	K	E	8	5	3	0.588931	0.320098	0.901266	0.415561	-0.523449	-0.116295	-0.389462	-0.338888	STYX	0.340481	0.0550939	-0.281548	0.295471	CENTER
ASTRB_56	sp|Q80TI0|ASTRB_MOUSE	Q80TI0	56	0.984	MVEKGSDHSSDKSPSTPEQGVQRSCSSQSGR	T	P	E	Q	4	2	2	0.158056	0.0943048	NA	NA	NA	-0.599682	0.49459	NA	STYX	0.12618	0.370061	-0.052546	0.894407	CENTER
ASTRC_251	sp|Q8CI52|ASTRC_MOUSE	Q8CI52	251	0.996	FSKAVSFTQESVSRASETEPLDGNSPKRGLG	S	E	T	E	7	5	2	0.252945	-0.311789	0.236017	0.504961	0.0562626	NA	0.944344	1.18949	STYX	0.147679	0.280049	1.06691	0.0319747	NR
ASTRC_260	sp|Q8CI52|ASTRC_MOUSE	Q8CI52	260	0.999	ESVSRASETEPLDGNSPKRGLGKEDSQSERN	S	P	K	R	8	5	3	1.18415	0.176724	0.1216	-0.141205	-0.463414	0.460962	0.590944	0.834574	STYX	0.175571	0.878877	0.628826	0.0492093	CENTER
ASTRC_279	sp|Q8CI52|ASTRC_MOUSE	Q8CI52	279	0.998	GLGKEDSQSERNVRKSPSLASEKRISRAPSK	S	P	S	L	8	5	3	0.429339	-0.110882	0.042328	0.0504049	0.0333026	0.993889	1.03924	0.994845	STYX	0.0888986	0.75411	1.00932	0.00974438	NR
ASXL2_1094 1095	sp|Q8BZ32|ASXL2_MOUSE	Q8BZ32	1094 1095	0.891	IKRTHSVNPDDRFCLSSPTEALRMGHADYKN KRTHSVNPDDRFCLSSPTEALRMGHADYKNT	S	S	P	T	4	2	2	NA	-0.309277	NA	-0.00380298	NA	-0.253007	NA	-0.0903779	STYX	-0.15654	0.194996	-0.171692	0.60213	CENTER
ASXL2_1254	sp|Q8BZ32|ASXL2_MOUSE	Q8BZ32	1254	0.989	QPLLLPPLQTPKLYGSPTQIGPSYRGMINVS	S	P	T	Q	7	4	3	0.591353	-0.501483	-0.859189	NA	-0.266381	-0.180401	-0.246639	-0.511893	STYX	-0.258925	0.095404	-0.312978	0.255489	CENTER
ASXL2_373	sp|Q8BZ32|ASXL2_MOUSE	Q8BZ32	373	0.998	KTPAEQPKSILPSEASPVRIVPVVPQSECKE	S	P	V	R	5	3	2	0.754493	-0.253552	-0.032137	NA	NA	-0.0146309	NA	-0.308666	STYX	0.156268	0.83754	-0.161648	0.626294	CENTER
ASXL2_653	sp|Q8BZ32|ASXL2_MOUSE	Q8BZ32	653	1	SVGGTIPGPGPGGGQSPREGGERKIAGGGSA	S	P	R	E	6	3	3	0.129862	0.248003	NA	-0.260981	NA	0.0694646	-0.284936	-0.246541	STYX	0.0389614	0.860273	-0.154004	0.571722	CENTER
AT10A_470	sp|O54827|AT10A_MOUSE	O54827	470	0.999	HDANAQRLARYQEADSEEEEVVSKVGTISHR	S	E	E	E	4	2	2	0.0571038	-0.2769	NA	NA	NA	NA	0.25423	1.09926	STYX	-0.109898	0.351814	0.676745	0.134681	CENTER
AT11C_1105	sp|Q9QZW0|AT11C_MOUSE	Q9QZW0	1105	0.991	VRRRSARRNLSCRRASDSLSARPSVRPLLLR	S	D	S	L	6	3	3	0.330121	0.478384	NA	-0.346138	NA	-0.468503	-0.850283	0.276522	STYX	0.154122	0.48341	-0.347421	0.299376	CENTER
AT11C_1123	sp|Q9QZW0|AT11C_MOUSE	Q9QZW0	1123	0.991	LSARPSVRPLLLRTFSDESNIL_________	S	D	E	S	7	4	3	0.251083	-0.616722	NA	0.0955738	-0.343038	-0.0172424	-0.324625	0.3342	STYX	-0.153276	0.398639	-0.00255594	0.997066	CENTER
AT131_22	sp|Q9EPE9|AT131_MOUSE	Q9EPE9	22	0.995	AVPCGARPGGARDNGSPQPGSRLRPGLAAGP	S	P	Q	P	6	4	2	-1.09796	1.42928	NA	0.092973	0.27785	0.249413	NA	0.286969	STYX	0.175536	0.410651	0.268191	0.398146	CENTER
AT131_896	sp|Q9EPE9|AT131_MOUSE	Q9EPE9	896	0.999	NAPERVVERRRRPRDSPVLSNSGPRVSRSTK	S	P	V	L	8	5	3	-0.516849	-0.111784	0.200253	-0.191336	0.0530963	-0.141977	-0.484677	-0.220716	STYX	-0.113324	0.190471	-0.282457	0.301498	CENTER
AT1A2_10	sp|Q6PIE5|AT1A2_MOUSE	Q6PIE5	10	0.994	______MGRGAGREYSPAATTAENGGGKKKQ	S	P	A	A	4	2	2	NA	0.711529	NA	NA	0.0960173	NA	-0.59169	-0.702781	STYX	0.403773	0.139659	-0.647236	0.0836457	CENTER
AT2A2_441	sp|O55143|AT2A2_MOUSE,sp|Q64518|AT2A3_MOUSE	O55143	441	0.997	DYNEAKGVYEKVGEATETALTCLVEKMNVFD	T	E	T	A	5	2	3	0.239531	-0.285161	NA	NA	NA	0.128157	-0.0912982	0.335133	STYX	-0.0228149	0.765603	0.123997	0.622263	CENTER
AT2A2_663	sp|O55143|AT2A2_MOUSE	O55143	663	0.997	TSKAFTGREFDELSPSAQRDACLNARCFARV	S	A	Q	R	8	5	3	0.177908	-0.0924815	0.104468	-0.0654806	-0.0688905	-0.576191	-0.423131	-0.247223	STYX	0.0111047	0.638563	-0.415515	0.138461	CENTER
AT2B1_1139 1140	sp|G5E829|AT2B1_MOUSE	G5E829	1139 1140	0.897	FRSSLYEGLEKPESRSSIHNFMTHPEFRIED RSSLYEGLEKPESRSSIHNFMTHPEFRIEDS	S	S	I	H	7	4	3	0.10051	0.0128544	-0.0940785	NA	-0.15391	-0.351939	-0.282981	-0.254184	STYX	-0.033656	0.363221	-0.296368	0.263625	CENTER
AT2B1_1155	sp|G5E829|AT2B1_MOUSE	G5E829	1155	0.996	SIHNFMTHPEFRIEDSEPHIPLIDDTDAEDD	S	E	P	H	7	4	3	0.0279574	0.161762	0.451853	0.266935	NA	-0.253321	-0.958658	-0.78561	STYX	0.227127	0.0819943	-0.665863	0.0461758	CENTER
AT2B1_1177 1178	sp|G5E829|AT2B1_MOUSE	G5E829	1177 1178	0.89	IDDTDAEDDAPTKRNSSPPPSPNKNNNAVDS DDTDAEDDAPTKRNSSPPPSPNKNNNAVDSG	S	S	P	P	6	4	2	-0.295437	0.725952	NA	-0.152347	0.0779369	-0.299475	-0.215093	NA	STYX	0.0890262	0.690182	-0.257284	0.426334	CENTER
AT2B1_1178	sp|G5E829|AT2B1_MOUSE	G5E829	1178	0.993	DDTDAEDDAPTKRNSSPPPSPNKNNNAVDSG	S	P	P	P	5	2	3	-0.174528	0.538287	NA	NA	NA	-0.572977	-0.486229	-0.421769	STYX	0.18188	0.864313	-0.493658	0.0817877	CENTER
AT2B1_1211	sp|G5E829|AT2B1_MOUSE,sp|Q9R0K7|AT2B2_MOUSE	G5E829	1211	0.999	LTIEMNKSATSSSPGSPLHSLETSL______	S	P	L	H	8	5	3	0.495146	-0.174012	0.28154	-0.187001	-0.0939249	0.0615365	-0.219602	-0.193157	STYX	0.0643497	0.703237	-0.117074	0.666463	CENTER
AT2B4_1173	sp|Q6Q477|AT2B4_MOUSE	Q6Q477	1173	0.999	SKAGTSVLLLDGEAASHDNINNNAVDCHQVQ	S	H	D	N	6	4	2	NA	-0.10256	0.336831	0.237385	-0.00482338	-0.694953	NA	-0.0405618	STYX	0.116708	0.561333	-0.367758	0.334885	CENTER
AT2B4_329	sp|Q6Q477|AT2B4_MOUSE	Q6Q477	329	0.999	AKTQDGVALEIQPLNSQEGLDSEDKEKKIAR	S	Q	E	G	8	5	3	0.333442	0.282036	0.529121	0.272087	-0.0321804	0.454605	0.571837	0.176171	STYQ	0.276901	0.0322071	0.400871	0.16232	CENTER
AT8A1_9	sp|P70704|AT8A1_MOUSE	P70704	9	0.995	_______MPTMRRTVSEIRSRAEGYEKTDDV	S	E	I	R	4	2	2	NA	-0.621287	NA	0.510308	NA	NA	-0.28094	0.224397	STYX	-0.0554897	0.901275	-0.0282717	0.946663	CENTER
AT8B2_1187	sp|P98199|AT8B2_MOUSE	P98199	1187	0.999	ALSSFSTRSSSSWIESLRRKKSDSANSPSGG	S	L	R	R	4	2	2	NA	-0.250157	-0.00971499	NA	NA	-0.439213	NA	-0.365854	STYX	-0.129936	0.204178	-0.402533	0.225476	CENTER
AT8B3_1145	sp|Q6UQ17|AT8B3_MOUSE	Q6UQ17	1145	1	RTVLKQRPKGEEEAPSEEVAVEPAMRHLRRG	S	E	E	V	7	5	2	-0.118851	0.032536	0.584393	0.128446	-0.0553288	NA	0.139546	-0.340289	STYX	0.114239	0.826018	-0.100372	0.777755	CENTER
AT8B3_1324	sp|Q6UQ17|AT8B3_MOUSE	Q6UQ17	1324	0.993	SSFWKSPLWRDSASSSPSQLEVPRKQS____	S	P	S	Q	8	5	3	-0.132236	-0.701131	0.135085	0.080606	0.0769005	0.473508	0.667162	0.569716	STYX	-0.108155	0.52011	0.570129	0.0627993	CENTER
AT8B3_138	sp|Q6UQ17|AT8B3_MOUSE	Q6UQ17	138	1	DKIINNRPCQILRGKSFLWKKWKNLCVGDVV	S	F	L	W	4	2	2	0.623532	-0.406002	NA	NA	NA	1.05653	0.650499	NA	STYX	0.108765	0.967278	0.853516	0.0564645	NR
AT8B3_800	sp|Q6UQ17|AT8B3_MOUSE	Q6UQ17	800	0.998	SQMWRNAGPSLGTSHSADSKIRESPEVQRER	S	A	D	S	5	3	2	-0.349864	0.062878	NA	NA	0.460231	NA	0.775873	-0.0157146	STYX	0.0577485	0.940047	0.380079	0.360779	CENTER
ATAD1_322	sp|Q9D5T0|ATAD1_MOUSE	Q9D5T0	322	0.998	ALLCVREYVNSTSEESHDEDEIRPVQQQDLH	S	H	D	E	6	4	2	-0.546891	0.443327	-0.0301989	NA	0.502346	NA	0.10377	-0.113677	STYX	0.0921459	0.681838	-0.00495335	0.987783	CENTER
ATAD3_320	sp|Q925I1|ATAD3_MOUSE	Q925I1	320	0.993	RLVSRPQDALEGVILSPSLEARVRDIAIATR	S	P	S	L	4	2	2	NA	0.0585625	NA	0.124671	NA	NA	-0.387443	-0.12181	STYX	0.0916169	0.544076	-0.254627	0.442895	CENTER
ATAT_261	sp|Q8K341|ATAT_MOUSE	Q8K341	261	1	AVEPPWPLNRAPRRATPPAHPPPRSSSLGNS	T	P	P	A	6	4	2	-0.676913	-0.254562	0.0101911	NA	0.0455548	-0.122498	0.459782	NA	STYX	-0.218932	0.10509	0.168642	0.638647	CENTER
ATAT_270 271 272 276	sp|Q8K341|ATAT_MOUSE	Q8K341	270 271 272 276	0.899	RAPRRATPPAHPPPRSSSLGNSPDRGPLRPF APRRATPPAHPPPRSSSLGNSPDRGPLRPFV PRRATPPAHPPPRSSSLGNSPDRGPLRPFVP TPPAHPPPRSSSLGNSPDRGPLRPFVPEQEL	S	S	S	L	4	2	2	-0.103567	-0.0328793	NA	NA	NA	NA	-0.312129	-1.44845	STYX	-0.0682234	0.288568	-0.880288	0.0937633	NR
ATAT_276	sp|Q8K341|ATAT_MOUSE	Q8K341	276	0.998	TPPAHPPPRSSSLGNSPDRGPLRPFVPEQEL	S	P	D	R	8	5	3	0.157954	0.165778	0.0259978	0.119802	-0.153732	0.0149847	0.0625838	0.0174021	STYX	0.06316	0.656575	0.0316569	0.873949	CENTER
ATAT_315	sp|Q8K341|ATAT_MOUSE	Q8K341	315	0.999	PHPTARLLLATDPGGSPAQRRRTRGTPWGLV	S	P	A	Q	8	5	3	0.120679	-0.298465	-0.0566963	0.143702	-0.224533	-0.163401	-0.625814	-0.314384	STYX	-0.0630627	0.297702	-0.367866	0.197814	CENTER
ATE1_166	sp|Q9Z2A5|ATE1_MOUSE	Q9Z2A5	166	0.997	ESEEKEKEKSIKKEGSKEFIHPQSIEEKLGS	S	K	E	F	6	3	3	0.0423695	0.0370421	-0.0221894	NA	NA	0.14066	-0.207696	-0.251138	STYX	0.0190741	0.880696	-0.106058	0.700229	CENTER
ATE1_174	sp|Q9Z2A5|ATE1_MOUSE	Q9Z2A5	174	1	KSIKKEGSKEFIHPQSIEEKLGSGEPSHPIK	S	I	E	E	4	2	2	0.72362	-0.106167	NA	NA	NA	NA	-0.156417	-0.0650842	STYX	0.308726	0.664011	-0.11075	0.73999	CENTER
ATF2_53	sp|P16951|ATF2_MOUSE	P16951	53	0.996	GPARNDSVIVADQTPTPTRFLKNCEEVGLFN	T	P	T	R	7	5	2	-0.146536	0.302723	0.217695	-0.0822573	-0.343846	NA	-0.522678	-0.352912	STYX	-0.0104443	0.541701	-0.437795	0.199319	CENTER
ATF2_94	sp|P16951|ATF2_MOUSE	P16951	94	0.998	KKASEDDIKKMPLDLSPLATPIIRSKIEEPS	S	P	L	A	7	4	3	0.273255	-0.446471	NA	0.0371554	-1.09751	-0.17764	-0.389105	-0.231519	STYX	-0.308393	0.288617	-0.266088	0.319743	CENTER
ATG12_66	sp|Q9CQY1|ATG12_MOUSE	Q9CQY1	66	1	DTKKKIDILLKAVGDTPIMKTKKWAVERTRT	T	P	I	M	5	3	2	0.990159	-0.556212	NA	0.184846	NA	0.0635107	NA	0.0426374	STYX	0.206264	0.603304	0.0530741	0.838251	CENTER
ATG13_258	sp|Q91YI1|ATG13_MOUSE	Q91YI1	258	0.997	SVEDSQEVCTTSFSTSPPSQLSSSRLSYQPA	S	P	P	S	5	3	2	-0.120975	-0.0713268	NA	0.803716	NA	NA	-0.129327	-0.0810916	STYX	0.203805	0.890198	-0.10521	0.755624	CENTER
ATG2A_1243	sp|Q6P4T0|ATG2A_MOUSE	Q6P4T0	1243	0.995	RPPSPTEIAGQKLSESPASLPSCLPVETALI	S	P	A	S	5	2	3	0.15784	0.499995	NA	NA	NA	-0.0486817	-0.541765	-0.0854603	STYX	0.328918	0.0995815	-0.225302	0.437055	CENTER
ATG2B_1765	sp|Q80XK6|ATG2B_MOUSE	Q80XK6	1765	1	LPRHLSTSKEPNLVVSFPGPKQASPNHRANS	S	F	P	G	5	3	2	NA	NA	-0.0814042	0.0531497	-0.570015	NA	-0.195879	-0.0359405	STYX	-0.199423	0.168805	-0.11591	0.724709	CENTER
ATG2B_240	sp|Q80XK6|ATG2B_MOUSE	Q80XK6	240	0.987	GVSLFWDEFSASAKSSPVCSTAPVETEPKLS	S	P	V	C	4	2	2	NA	0.137245	NA	-0.142196	NA	-0.159881	0.260271	NA	STYX	-0.00247565	0.731104	0.0501951	0.865343	CENTER
ATG2B_255	sp|Q80XK6|ATG2B_MOUSE	Q80XK6	255	0.994	SPVCSTAPVETEPKLSPSWNPKIVYEPHPQL	S	P	S	W	7	5	2	0.597853	0.425059	0.18002	0.244062	0.450982	0.0228115	0.0930253	NA	STYX	0.379595	0.00345407	0.0579184	0.828283	CENTER
ATG4D_467 468	sp|Q8BGV9|ATG4D_MOUSE	Q8BGV9	467 468	0.874	LRLPCTGRLLKAKRPSSEDFVFL________ RLPCTGRLLKAKRPSSEDFVFL_________	S	S	E	D	5	2	3	NA	NA	NA	0.239726	0.185011	-0.143656	0.0135852	-0.201815	STYX	0.212368	0.149297	-0.110629	0.681599	CENTER
ATIF1_27	sp|O35143|ATIF1_MOUSE	O35143	27	0.996	FGVWGMKVLQTRGFVSDSSDSMDTGAGSIRE	S	D	S	S	7	5	2	-0.0859752	0.177505	0.311672	-0.402388	0.0621028	-0.501615	NA	-0.597994	STYX	0.0125833	0.959074	-0.549805	0.122856	CENTER
ATIF1_29	sp|O35143|ATIF1_MOUSE	O35143	29	0.995	VWGMKVLQTRGFVSDSSDSMDTGAGSIREAG	S	S	D	S	5	3	2	NA	-0.282553	NA	0.128856	-0.230711	NA	0.0119949	-0.501358	STYX	-0.128136	0.179523	-0.244681	0.489772	CENTER
ATIF1_32	sp|O35143|ATIF1_MOUSE	O35143	32	0.999	MKVLQTRGFVSDSSDSMDTGAGSIREAGGAF	S	M	D	T	8	5	3	0.211562	-0.323358	-0.0376861	-0.476296	-0.277073	-0.290244	-0.449997	-0.139878	STYX	-0.18057	0.0547665	-0.293373	0.279418	CENTER
ATLA1_10	sp|Q8BH66|ATLA1_MOUSE	Q8BH66	10	0.998	______MAKSRRDRNSWGGFSEKSSDWSSEE	S	W	G	G	7	5	2	0.722092	-0.022607	0.0695247	0.080562	-0.289037	NA	-0.35208	-0.255617	STYX	0.112107	0.880756	-0.303848	0.350714	CENTER
ATLA1_22	sp|Q8BH66|ATLA1_MOUSE	Q8BH66	22	0.99	DRNSWGGFSEKSSDWSSEEEEPVRKAGPVQV	S	S	E	E	8	5	3	0.264745	-0.514425	0.152418	-0.164999	-0.156772	0.457954	0.478309	0.592209	STYX	-0.0838068	0.315384	0.50949	0.0847874	CENTER
ATM_1897	sp|Q62388|ATM_MOUSE	Q62388	1897	0.997	HSSQASRSATPANSDSESENFLRCCLDKKSQ	S	E	S	E	7	5	2	0.383395	0.258163	-0.0677619	-0.0171822	0.139876	NA	-0.0792657	0.298405	STYX	0.139298	0.338791	0.10957	0.725323	CENTER
ATM_1987	sp|Q62388|ATM_MOUSE	Q62388	1987	0.999	STDEQEKRSPTFEEGSQGTTISSLSEKSKEE	S	Q	G	T	8	5	3	0.810322	0.452209	-0.0515478	-0.0491708	-0.347001	0.17959	-0.198204	0.0561529	STYQ	0.162962	0.910575	0.0125129	0.931965	CENTER
ATMIN_94	sp|Q6P9S1|ATMIN_MOUSE	Q6P9S1	94	1	NILCTVRGCGKILPNSPALNMHLVKSHRLQD	S	P	A	L	7	4	3	0.511434	-0.489133	NA	0.066254	-0.496997	0.278715	0.324169	1.09367	STYX	-0.102111	0.437289	0.565518	0.0984748	CENTER
ATN1_34	sp|O35126|ATN1_MOUSE	O35126	34	0.998	EAPGPREELRSRGRASPGGVSTSSSDGKAEK	S	P	G	G	8	5	3	-0.928225	0.225506	-0.270359	-0.432012	0.157185	-0.0991814	-0.576186	0.157514	STYX	-0.249581	0.177351	-0.172618	0.582131	CENTER
ATN1_617	sp|O35126|ATN1_MOUSE	O35126	617	0.997	VIATVASSPAGYKTASPPGPPQYSKRAPSPG	S	P	P	G	6	3	3	0.0530696	-0.138165	-0.261774	NA	NA	-0.0391422	-0.510173	-0.266881	STYX	-0.115623	0.148934	-0.272065	0.32986	CENTER
ATN1_630	sp|O35126|ATN1_MOUSE	O35126	630	0.998	TASPPGPPQYSKRAPSPGSYKTATPPGYKPG	S	P	G	S	8	5	3	0.246571	-0.371529	-0.295583	-0.388856	0.107402	-0.202579	-0.543616	-0.63605	STYX	-0.140399	0.161448	-0.460749	0.113536	CENTER
ATPA_76	sp|Q03265|ATPA_MOUSE	Q03265	76	1	GADTSVDLEETGRVLSIGDGIARVHGLRNVQ	S	I	G	D	4	2	2	1.53945	-0.511411	NA	NA	NA	NA	-0.488752	-0.370401	STYX	0.514021	0.986477	-0.429577	0.202723	CENTER
ATR_431	sp|Q9JKK8|ATR_MOUSE	Q9JKK8	431	0.999	CQAQQENLSGNNDEVSPKRRKLSSSLSSYKK	S	P	K	R	8	5	3	0.308762	0.253151	-0.0135579	0.106756	0.0957359	0.429632	0.485147	0.145734	STYX	0.150169	0.167102	0.353504	0.203981	CENTER
ATR_440	sp|Q9JKK8|ATR_MOUSE	Q9JKK8	440	0.982	GNNDEVSPKRRKLSSSLSSYKKPSRQPEEII	S	L	S	S	5	2	3	0.879973	0.0154237	NA	NA	NA	0.327201	0.448779	0.867778	STYX	0.447698	0.275818	0.547919	0.0823287	CENTER
ATRIP_14	sp|Q8BMG1|ATRIP_MOUSE	Q8BMG1	14	0.995	__MAGTPAPNSHRKQSGGLEPFPGLSRSIEN	S	G	G	L	7	5	2	0.776068	0.238343	0.316706	0.390053	0.261585	-0.129808	NA	-0.0559802	STYX	0.396551	0.00303552	-0.0928939	0.783914	CENTER
ATRIP_224	sp|Q8BMG1|ATRIP_MOUSE	Q8BMG1	224	0.999	NGRTNKPAAPSVSHVSPRKGSSVVLKSEACS	S	P	R	K	8	5	3	0.902012	0.0824646	0.321755	-0.858767	1.24094	0.676584	0.850876	0.335502	STYX	0.337681	0.137562	0.620988	0.0556938	CENTER
ATRIP_97	sp|Q8BMG1|ATRIP_MOUSE	Q8BMG1	97	1	LSSAHKVRRLDGLPNSPIRKSREDIPVKDNF	S	P	I	R	8	5	3	1.18021	-0.221941	-0.157681	-0.0632307	0.0658	0.535137	0.420789	0.447836	STYX	0.160632	0.510282	0.467921	0.105706	CENTER
ATRX_1172	sp|Q61687|ATRX_MOUSE	Q61687	1172	0.999	KTGNTKEKKRNSLRATPKRKQVDITSSSSDI	T	P	K	R	6	4	2	NA	-0.12699	0.220701	0.535084	0.0413137	NA	-0.537847	-0.829244	STYX	0.167527	0.431774	-0.683545	0.0771861	CENTER
ATRX_1290	sp|Q61687|ATRX_MOUSE	Q61687	1290	0.999	PDGGGKKRIGKQSEESPADDGELRREQLAVN	S	P	A	D	7	4	3	-0.110235	0.425344	-0.0796569	-0.255598	NA	-0.744526	-1.00255	-0.982441	STYX	-0.00503658	0.336318	-0.909838	0.0106774	NR
ATRX_1512	sp|Q61687|ATRX_MOUSE	Q61687	1512	0.998	REREKLREVIEIEDASPTKCPITTKLVLDEN	S	P	T	K	5	3	2	NA	0.0987587	0.131026	-0.461128	NA	NA	-0.474704	-0.848068	STYX	-0.0771144	0.768893	-0.661386	0.0872477	CENTER
ATRX_590	sp|Q61687|ATRX_MOUSE	Q61687	590	0.998	RKELFVKLTPVSLSNSPIKGVDCQEVSQEKN	S	P	I	K	5	2	3	NA	0.0747845	0.169311	NA	NA	-0.904618	-0.646096	0.203628	STYX	0.122048	0.398329	-0.449029	0.19884	CENTER
ATRX_626	sp|Q61687|ATRX_MOUSE	Q61687	626	0.999	GVARSSEKCRPREEISDHENNVTILLEDSDL	S	D	H	E	4	2	2	0.250113	0.00632726	NA	NA	NA	NA	-0.895698	-0.361176	STYX	0.12822	0.497836	-0.628437	0.110353	CENTER
ATRX_650	sp|Q61687|ATRX_MOUSE	Q61687	650	0.991	LLEDSDLRRSPRVKTTPLRRQTESNPAMSNS	T	P	L	R	5	2	3	0.207638	-0.0834575	NA	NA	NA	-0.664532	-1.21175	-1.91582	STYX	0.0620903	0.925825	-1.26404	0.00773268	NR
ATRX_92	sp|Q61687|ATRX_MOUSE	Q61687	92	0.997	SRSKRKPSIVTKYVESDDEKPTDENVNEKAA	S	D	D	E	8	5	3	-0.403579	-0.0763726	0.516618	-0.585279	-0.315404	-1.16683	-1.87759	-1.40464	STYX	-0.172803	0.0594864	-1.48302	0.00365218	NR
ATS8_634	sp|P57110|ATS8_MOUSE,sp|P59384|ATS15_MOUSE	P57110	634	0.951	LDGNFLQWVPKYSGVSPRDRCKLFCRARGRS	S	P	R	D	6	4	2	-0.644551	NA	0.00152879	0.141633	-0.945272	0.704318	0.463107	NA	STYX	-0.361665	0.143924	0.583712	0.124093	CENTER
ATX1_382	sp|P54254|ATX1_MOUSE	P54254	382	0.99	PSADLEAQQTTHREASPSTLNDKSGLHLGKP	S	P	S	T	6	3	3	-0.145941	0.0641885	0.0415681	NA	NA	-0.708936	-0.719682	-0.9889	STYX	-0.0133947	0.62094	-0.805839	0.0164316	CENTER
ATX1_751	sp|P54254|ATX1_MOUSE	P54254	751	0.996	KIEPSKPTATRKRRWSAPETRKLEKSEDEPP	S	A	P	E	8	5	3	0.0253568	0.274192	-0.259746	-0.1262	0.109824	-0.154553	-0.203863	0.042697	STYX	0.00468539	0.688081	-0.105239	0.700625	CENTER
ATX1L_328	sp|P0C7T6|ATX1L_MOUSE	P0C7T6	328	0.998	SQTPRVEVAAPAHRGTPDTDLEVQRVVGALA	T	P	D	T	8	5	3	-0.250912	0.105555	-0.182494	-0.159763	0.100398	-0.472942	-0.370474	-0.715994	STYX	-0.0774432	0.171861	-0.519803	0.0745767	CENTER
ATX2_435	sp|O70305|ATX2_MOUSE	O70305	435	1	SAQYKARVALENDDRSEEEKYTAVQRNCSDR	S	E	E	E	8	5	3	0.193048	0.182392	-0.0785569	-0.0676019	-0.0115555	-0.669451	-0.720862	-0.993354	STYX	0.043545	0.97476	-0.794556	0.0176901	CENTER
ATX2_585 586	sp|O70305|ATX2_MOUSE	O70305	585 586	0.858	AHGSPAPVSTMPKRMSSEGPPRMSPKAQRHP HGSPAPVSTMPKRMSSEGPPRMSPKAQRHPR	S	S	E	G	4	2	2	NA	-0.459867	0.00296147	NA	NA	-0.831119	NA	0.603102	STYX	-0.228453	0.18287	-0.114009	0.830836	CENTER
ATX2_593	sp|O70305|ATX2_MOUSE	O70305	593	0.999	STMPKRMSSEGPPRMSPKAQRHPRNHRVSAG	S	P	K	A	8	5	3	0.0280274	0.186872	-0.156738	-0.032384	0.178308	-0.254738	-0.383829	-0.553339	STYX	0.0408169	0.978229	-0.397302	0.15239	CENTER
ATX2_636	sp|O70305|ATX2_MOUSE	O70305	636	0.985	HNPPSEAAAPPVARTSPAGGTWSSVVSGVPR	S	P	A	G	7	4	3	-0.0860063	-0.169087	0.00650457	0.16507	NA	-0.0706234	-0.446361	-0.0741746	STYX	-0.0208796	0.444773	-0.197053	0.479164	CENTER
ATX2_653	sp|O70305|ATX2_MOUSE	O70305	653	0.999	AGGTWSSVVSGVPRLSPKTHRPRSPRQSSIG	S	P	K	T	8	5	3	0.287222	0.411408	-0.0395814	-0.223411	-0.00380865	-0.155768	-0.859139	-0.518715	STYX	0.086366	0.851837	-0.511207	0.102236	CENTER
ATX2_702	sp|O70305|ATX2_MOUSE	O70305	702	0.989	EAVSMPVPAASPTPASPASNRALTPSIEAKD	S	P	A	S	4	2	2	-0.547899	-0.161938	NA	NA	NA	NA	-0.0724506	0.212733	STYX	-0.354918	0.0365123	0.0701411	0.804119	CENTER
ATX2_710	sp|O70305|ATX2_MOUSE	O70305	710	0.994	AASPTPASPASNRALTPSIEAKDSRLQDQRQ	T	P	S	I	8	5	3	0.0866542	-0.729471	-0.285948	0.389598	-0.204767	-0.670657	-1.85462	-1.13706	STYX	-0.148787	0.206032	-1.22078	0.00802643	NR
ATX2_727	sp|O70305|ATX2_MOUSE	O70305	727	0.998	SIEAKDSRLQDQRQNSPAGSKENVKASETSP	S	P	A	G	8	5	3	-0.877238	2.10879	0.241449	0.18694	0.292856	0.814131	-0.0602326	-1.22243	STYX	0.390558	0.140215	-0.156178	0.812037	CENTER
ATX2_740 741	sp|O70305|ATX2_MOUSE	O70305	740 741	0.899	QNSPAGSKENVKASETSPSFSKADNKGMSPV NSPAGSKENVKASETSPSFSKADNKGMSPVV	T	S	P	S	7	4	3	NA	0.054498	0.0100079	-0.19579	-0.321656	-0.134756	0.0469871	-1.83036	STYX	-0.113235	0.143195	-0.639375	0.276457	CENTER
ATX2_741	sp|O70305|ATX2_MOUSE	O70305	741	0.995	NSPAGSKENVKASETSPSFSKADNKGMSPVV	S	P	S	F	7	4	3	0.493923	0.0123264	-0.108068	-0.302898	NA	-0.242056	-0.161308	-0.206966	STYX	0.0238208	0.546523	-0.203443	0.441405	CENTER
ATX2_753	sp|O70305|ATX2_MOUSE	O70305	753	0.999	SETSPSFSKADNKGMSPVVSEHRKQIDDLKK	S	P	V	V	4	2	2	-0.024754	-0.446832	NA	NA	NA	NA	0.627934	-0.0319517	STYX	-0.235793	0.137434	0.297991	0.43727	CENTER
ATX2_783	sp|O70305|ATX2_MOUSE	O70305	783	0.998	KFKNDFRLQPSSTSESMDQLLSKNREGEKSR	S	M	D	Q	7	5	2	0.210436	-0.180291	0.0474296	0.224033	-0.0710921	-0.227752	NA	-0.154806	STYX	0.0461032	0.962623	-0.191279	0.554012	CENTER
ATX2_832	sp|O70305|ATX2_MOUSE	O70305	832	0.986	SSSSSNCTSGSSKTNSPSISPSMLSNAEHKR	S	P	S	I	5	3	2	NA	0.315615	0.256792	NA	0.00302119	NA	-0.0707682	-0.371398	STYX	0.191809	0.19605	-0.221083	0.504715	CENTER
ATX2_836	sp|O70305|ATX2_MOUSE	O70305	836	0.998	SNCTSGSSKTNSPSISPSMLSNAEHKRGPEV	S	P	S	M	8	5	3	0.197298	0.294849	-0.0536657	0.124677	-0.13608	-0.434258	-0.125234	-0.426905	STYX	0.0854155	0.643158	-0.328799	0.229532	CENTER
ATX2_860	sp|O70305|ATX2_MOUSE	O70305	860	0.994	HKRGPEVTSQGVQTSSPACKQEKDDREEKKD	S	P	A	C	5	2	3	-0.544648	0.394628	NA	NA	NA	-0.281625	-0.286247	0.114353	STYX	-0.0750103	0.844911	-0.151173	0.582406	CENTER
ATX2L_109	sp|Q7TQH0|ATX2L_MOUSE	Q7TQH0	109	0.999	IGSVRGQTTGKGPPQSPVFEGVYNNSRMLHF	S	P	V	F	8	5	3	-0.29714	0.0283385	-0.164402	-0.13341	0.193773	-0.175501	-0.60164	-0.430331	STYX	-0.0745683	0.17576	-0.402491	0.156845	CENTER
ATX2L_27	sp|Q7TQH0|ATX2L_MOUSE	Q7TQH0	27	0.998	QPQQPPPTQQAVARRSPGGTSPPNGGLPGPL	S	P	G	G	8	5	3	-0.527758	0.0321356	0.383179	0.626066	-0.0158222	-0.125997	-0.133491	-0.0418657	STYX	0.09956	0.67169	-0.100451	0.71315	CENTER
ATX2L_303 304	sp|Q7TQH0|ATX2L_MOUSE	Q7TQH0	303 304	0.898	RQRELRAAQLAREIESSPQYRLRIAMENDDG QRELRAAQLAREIESSPQYRLRIAMENDDGR	S	S	P	Q	6	4	2	NA	0.114046	-0.0929777	-0.0240556	0.207706	0.00956877	NA	0.312586	STYX	0.0511797	0.913557	0.161077	0.613009	CENTER
ATX2L_304	sp|Q7TQH0|ATX2L_MOUSE	Q7TQH0	304	0.976	QRELRAAQLAREIESSPQYRLRIAMENDDGR	S	P	Q	Y	5	2	3	0.511783	-0.0362828	NA	NA	NA	0.555109	0.499769	0.424649	STYX	0.23775	0.479537	0.493176	0.0927551	CENTER
ATX2L_31 32	sp|Q7TQH0|ATX2L_MOUSE	Q7TQH0	31 32	0.892	PPPTQQAVARRSPGGTSPPNGGLPGPLTATA PPTQQAVARRSPGGTSPPNGGLPGPLTATAA	T	S	P	P	6	3	3	0.30565	0.450562	NA	-6.64	NA	-0.114564	-0.0517695	-0.0854992	STYX	-1.96126	0.555201	-0.0839442	0.766136	NR
ATX2L_32	sp|Q7TQH0|ATX2L_MOUSE	Q7TQH0	32	0.997	PPTQQAVARRSPGGTSPPNGGLPGPLTATAA	S	P	P	N	6	3	3	-0.0824967	0.0415058	NA	0.670767	NA	0.0204366	0.0421246	-0.0156405	STYX	0.209925	0.629747	0.0156403	0.925802	CENTER
ATX2L_337	sp|Q7TQH0|ATX2L_MOUSE	Q7TQH0	337	0.998	EEKHSAVQRQGSGRESPSLVSREGKYIPLPQ	S	P	S	L	8	5	3	-0.369925	-0.214087	-0.101466	0.0422609	0.534879	0.655253	0.386101	0.107049	STYX	-0.0216676	0.286133	0.382801	0.191829	CENTER
ATX2L_389	sp|Q7TQH0|ATX2L_MOUSE	Q7TQH0	389	0.996	LSSLPPRGPHHLDNSSPGPGSEARGINGGPS	S	P	G	P	5	2	3	-0.318765	1.07138	NA	NA	NA	0.372841	0.537738	0.493869	STYX	0.376308	0.943014	0.468149	0.106487	CENTER
ATX2L_407	sp|Q7TQH0|ATX2L_MOUSE	Q7TQH0	407	0.999	PGSEARGINGGPSRMSPKAQRPLRGAKTLSS	S	P	K	A	7	5	2	0.0257683	-0.286732	-0.306699	0.00127926	0.159656	1.04094	NA	0.384078	STYX	-0.0813456	0.254516	0.712509	0.101686	CENTER
ATX2L_421 422	sp|Q7TQH0|ATX2L_MOUSE	Q7TQH0	421 422	0.897	MSPKAQRPLRGAKTLSSPSNRPSGEASVPPT SPKAQRPLRGAKTLSSPSNRPSGEASVPPTS	S	S	P	S	6	4	2	NA	0.403083	0.0891941	0.213963	-0.168425	0.308452	0.13008	NA	STYX	0.134454	0.423478	0.219266	0.482595	CENTER
ATX2L_422	sp|Q7TQH0|ATX2L_MOUSE	Q7TQH0	422	0.987	SPKAQRPLRGAKTLSSPSNRPSGEASVPPTS	S	P	S	N	4	2	2	0.552659	0.39101	NA	NA	NA	NA	-0.116004	0.594468	STYX	0.471834	0.0361179	0.239232	0.539845	CENTER
ATX2L_424	sp|Q7TQH0|ATX2L_MOUSE	Q7TQH0	424	0.968	KAQRPLRGAKTLSSPSNRPSGEASVPPTSAA	S	N	R	P	7	5	2	0.27322	0.213819	-0.0352091	0.609671	-3.73409	0.137376	NA	0.218434	STYX	-0.534517	0.482873	0.177905	0.551602	CENTER
ATX2L_453	sp|Q7TQH0|ATX2L_MOUSE	Q7TQH0	453	0.999	AALPFLPVGRMYPPRSPKSAAPAPVSASCPE	S	P	K	S	8	5	3	0.387194	-0.42322	-0.484647	-0.232325	0.157692	0.625148	0.371805	0.301405	STYX	-0.119061	0.249841	0.432786	0.13358	CENTER
ATX2L_499	sp|Q7TQH0|ATX2L_MOUSE	Q7TQH0	499	0.999	TSSVVDPGAGSISPASPKLSLTPTDVKELPT	S	P	K	L	8	5	3	-0.199574	0.171711	0.0826504	-0.454653	-0.0451102	0.791991	0.153634	0.235585	STYX	-0.0889951	0.285899	0.393737	0.19545	CENTER
ATX2L_505	sp|Q7TQH0|ATX2L_MOUSE	Q7TQH0	505	0.996	PGAGSISPASPKLSLTPTDVKELPTKEPSRN	T	P	T	D	8	5	3	0.925279	-0.221167	-0.111097	-0.156595	-0.440532	-0.378794	-0.44385	-0.154262	STYX	-0.00082242	0.0966948	-0.325635	0.230259	CENTER
ATX2L_562	sp|Q7TQH0|ATX2L_MOUSE	Q7TQH0	562	0.996	ELRKFGAQFKLQPSSSPETGLDPFPSRILKE	S	P	E	T	8	5	3	0.321685	0.0417542	-0.0628172	-0.0418742	-0.0606139	-0.0383026	0.0736356	0.128054	STYX	0.0396268	0.780763	0.0544624	0.801889	CENTER
ATX2L_597	sp|Q7TQH0|ATX2L_MOUSE	Q7TQH0	597	0.999	KEKEVDGLLTSDPMGSPVSSKTESILDKEDK	S	P	V	S	8	5	3	0.566859	0.397883	0.123661	-0.0433285	-0.423219	-0.0460881	-0.0865333	0.152133	STYX	0.124371	0.536774	0.0065038	0.950371	CENTER
ATX2L_681 682 683 684	sp|Q7TQH0|ATX2L_MOUSE	Q7TQH0	681 682 683 684	0.892	AKEFNPTKPLLSVNKSTSTPTSPGPRTHSTP KEFNPTKPLLSVNKSTSTPTSPGPRTHSTPS EFNPTKPLLSVNKSTSTPTSPGPRTHSTPSI FNPTKPLLSVNKSTSTPTSPGPRTHSTPSIP	S	T	S	T	8	5	3	-0.643801	-0.167035	-0.138199	0.288593	-0.003763	0.608808	0.400466	0.472421	STYX	-0.132841	0.154106	0.493898	0.0931974	CENTER
ATX2L_681 682 683 684 686 687	sp|Q7TQH0|ATX2L_MOUSE	Q7TQH0	681 682 683 684 686 687	0.896	AKEFNPTKPLLSVNKSTSTPTSPGPRTHSTP KEFNPTKPLLSVNKSTSTPTSPGPRTHSTPS EFNPTKPLLSVNKSTSTPTSPGPRTHSTPSI FNPTKPLLSVNKSTSTPTSPGPRTHSTPSIP PTKPLLSVNKSTSTPTSPGPRTHSTPSIPVL TKPLLSVNKSTSTPTSPGPRTHSTPSIPVLT	S	T	S	T	7	5	2	-0.728498	0.0579023	0.0401499	0.840579	0.144005	0.499523	0.492025	NA	STYX	0.0708277	0.662424	0.495774	0.166947	CENTER
ATX2L_683	sp|Q7TQH0|ATX2L_MOUSE	Q7TQH0	683	0.988	EFNPTKPLLSVNKSTSTPTSPGPRTHSTPSI	S	T	P	T	8	5	3	-0.13515	-0.103115	-0.636436	-0.063938	0.0294057	0.809002	0.763193	0.186375	STYX	-0.181847	0.0395855	0.58619	0.0743376	CENTER
ATX2L_686	sp|Q7TQH0|ATX2L_MOUSE	Q7TQH0	686	0.976	PTKPLLSVNKSTSTPTSPGPRTHSTPSIPVL	T	S	P	G	4	2	2	NA	-0.270467	NA	0.493257	NA	0.592734	NA	-0.0956278	STYX	0.111395	0.999412	0.248553	0.517984	CENTER
ATX2L_686 687	sp|Q7TQH0|ATX2L_MOUSE	Q7TQH0	686 687	0.899	PTKPLLSVNKSTSTPTSPGPRTHSTPSIPVL TKPLLSVNKSTSTPTSPGPRTHSTPSIPVLT	T	S	P	G	8	5	3	0.0846435	0.117303	-0.0778203	0.156454	0.17613	0.611717	0.879939	0.501919	STYX	0.091342	0.409765	0.664525	0.0418948	CENTER
ATX2L_687	sp|Q7TQH0|ATX2L_MOUSE	Q7TQH0	687	0.995	TKPLLSVNKSTSTPTSPGPRTHSTPSIPVLT	S	P	G	P	8	5	3	0.133909	-0.182074	-0.0804892	-0.0743929	0.359318	0.409155	0.804947	0.46896	STYX	0.031254	0.670633	0.561021	0.0710976	CENTER
ATX2L_766	sp|Q7TQH0|ATX2L_MOUSE	Q7TQH0	766	0.999	KGSLPPQRSDQHQPASAPPMMQAAAAAAGPP	S	A	P	P	5	3	2	-0.887501	0.00821182	NA	NA	0.674142	0.0482612	0.255442	NA	STYX	-0.0683823	0.870579	0.151851	0.617039	CENTER
ATX3_260 261	sp|Q9CVD2|ATX3_MOUSE	Q9CVD2	260 261	0.898	EEADLRRAIQLSMQGSSRSMCENSPQTSSPD EADLRRAIQLSMQGSSRSMCENSPQTSSPDL	S	S	R	S	8	5	3	-0.305813	-0.15584	0.099902	0.110022	-0.317007	0.433584	0.476468	-0.137759	STYX	-0.113747	0.135462	0.257431	0.373524	CENTER
ATX3_268	sp|Q9CVD2|ATX3_MOUSE	Q9CVD2	268	0.998	IQLSMQGSSRSMCENSPQTSSPDLSSEELRR	S	P	Q	T	8	5	3	-0.521444	0.0725888	-0.0413816	0.266755	0.0773276	0.265719	0.560711	0.0351364	STYX	-0.0292309	0.862243	0.287189	0.310468	CENTER
ATX3_271 272 273	sp|Q9CVD2|ATX3_MOUSE	Q9CVD2	271 272 273	0.895	SMQGSSRSMCENSPQTSSPDLSSEELRRRRE MQGSSRSMCENSPQTSSPDLSSEELRRRREA QGSSRSMCENSPQTSSPDLSSEELRRRREAY	T	S	S	P	8	5	3	-0.520943	0.131341	-0.0389262	0.148851	0.147796	0.278776	0.335151	0.102127	STYX	-0.0263764	0.988391	0.238685	0.357027	CENTER
ATX3_272	sp|Q9CVD2|ATX3_MOUSE	Q9CVD2	272	0.965	MQGSSRSMCENSPQTSSPDLSSEELRRRREA	S	S	P	D	5	3	2	-0.840214	0.162866	-0.0521979	NA	NA	NA	1.25351	-0.0640924	STYX	-0.243182	0.374386	0.594709	0.296755	CENTER
ATX3_273	sp|Q9CVD2|ATX3_MOUSE	Q9CVD2	273	0.998	QGSSRSMCENSPQTSSPDLSSEELRRRREAY	S	P	D	L	8	5	3	-0.433648	0.0915331	0.0917984	0.140692	0.109534	0.558431	0.447271	0.306049	STYX	-1.81e-05	0.823276	0.437251	0.128228	CENTER
AUTS2_1235	sp|A0A087WPF7|AUTS2_MOUSE	A0A087WPF7	1235	0.997	SAPPPLISTLGGRPGSPRRTTPLSAEIRERP	S	P	R	R	6	3	3	0.132708	0.0758835	0.585842	NA	NA	-0.184473	0.307894	0.0248542	STYX	0.264811	0.1341	0.0494252	0.842558	CENTER
AUTS2_941	sp|A0A087WPF7|AUTS2_MOUSE	A0A087WPF7	941	0.996	GRAAGEEPKQLSRVPSPYVRTPGVDSTRPNS	S	P	Y	V	8	5	3	0.616352	-0.684226	-0.160011	0.0193213	0.0259407	0.108795	-0.108232	0.252767	STYX	-0.0365246	0.500683	0.084443	0.722444	CENTER
AUTS2_956	sp|A0A087WPF7|AUTS2_MOUSE	A0A087WPF7	956	0.991	SPYVRTPGVDSTRPNSTSSREAEPRKGEPAY	S	T	S	S	4	2	2	-0.754837	NA	NA	0.0645169	NA	-0.101519	NA	-0.318645	STYX	-0.34516	0.304247	-0.210082	0.52298	CENTER
AVL9_368	sp|Q80U56|AVL9_MOUSE	Q80U56	368	0.997	SDQTHLFQKDSLPSDSPPITVQPQANNRQVV	S	P	P	I	7	5	2	-0.45742	0.389527	0.0506065	0.278002	0.106036	0.00916197	NA	-0.0240187	STYX	0.0733503	0.460805	-0.00742836	0.998497	CENTER
AXIN1_217	sp|O35625|AXIN1_MOUSE	O35625	217	0.986	LKSDIYLEYTRTGSESPKVCSDQSSGSGTGK	S	P	K	V	6	4	2	-0.72016	NA	-0.192111	-0.391694	0.085294	0.851254	-0.1378	NA	STYX	-0.304668	0.0312954	0.356727	0.443188	CENTER
AXIN1_485	sp|O35625|AXIN1_MOUSE	O35625	485	0.999	LDEHVQRVMRTPGCQSPGPGHRSPDSGHVAK	S	P	G	P	8	5	3	-0.51519	-0.033412	-0.0388037	-0.218518	-0.210447	0.0313667	0.525274	-0.0610091	STYX	-0.203274	0.0125818	0.165211	0.569179	CENTER
AXIN1_77	sp|O35625|AXIN1_MOUSE	O35625	77	0.997	RRSDLDLGYEPEGSASPTPPYLRWAESLHSL	S	P	T	P	7	4	3	0.533695	0.229921	0.0775928	NA	-0.397261	0.18889	0.560879	0.483005	STYX	0.110987	0.500632	0.410925	0.153427	CENTER
AZI2_313 314	sp|Q9QYP6|AZI2_MOUSE	Q9QYP6	313 314	0.891	HPSLSPNGKAPCYAPSSPLPGDRKVFSDKAV PSLSPNGKAPCYAPSSPLPGDRKVFSDKAVL	S	S	P	L	5	3	2	-0.0150227	0.127353	0.102312	NA	NA	-0.195632	NA	-0.262666	STYX	0.0715477	0.643583	-0.229149	0.47852	CENTER
AZI2_82 83 84	sp|Q9QYP6|AZI2_MOUSE	Q9QYP6	82 83 84	0.861	RALEERLVGARADEETSSVGREQVNKAYHAY ALEERLVGARADEETSSVGREQVNKAYHAYR LEERLVGARADEETSSVGREQVNKAYHAYRE	T	S	S	V	5	3	2	0.214017	0.69561	NA	0.0590822	NA	-0.386494	NA	0.888272	STYX	0.322903	0.0970124	0.250889	0.67738	CENTER
B0QZP0_133	tr|B0QZP0|B0QZP0_MOUSE,sp|Q5SV06|SPT22_MOUSE	B0QZP0	133	0.996	TSLRTWDFRPQHKTVSPAANSEFSSCPVNLG	S	P	A	A	6	4	2	NA	-0.196106	-0.111126	0.211271	0.0702346	0.0774808	NA	-0.372473	STYX	-0.00643162	0.586812	-0.147496	0.669728	CENTER
B1AR10_441	tr|B1AR10|B1AR10_MOUSE	B1AR10	441	0.998	RFTTTASSSSRARAPSPGDYKSPHITGAGAS	S	P	G	D	5	2	3	0.364658	-0.314568	NA	NA	NA	-0.352872	-0.711218	-0.715277	STYX	0.0250448	0.885994	-0.593122	0.0511371	CENTER
B1AR17_1651	tr|B1AR17|B1AR17_MOUSE	B1AR17	1651	0.995	EKNSKVGEKMEAEVDSPSPAPSLGERLEHRK	S	P	S	P	7	5	2	0.209258	-0.0643161	0.218989	-0.308094	-0.191111	NA	-0.242386	-0.433502	STYX	-0.0270547	0.474259	-0.337944	0.308039	CENTER
B1AR17_764 765	tr|B1AR17|B1AR17_MOUSE	B1AR17	764 765	0.89	KYKKKKKELQGDGPPSSPTNDPTVKYETQPR YKKKKKELQGDGPPSSPTNDPTVKYETQPRF	S	S	P	T	6	3	3	NA	NA	-0.227396	-0.290829	0.158723	-0.567802	-0.738289	0.0668132	STYX	-0.119834	0.20888	-0.413092	0.188078	CENTER
B1AR17_765	tr|B1AR17|B1AR17_MOUSE	B1AR17	765	0.952	YKKKKKELQGDGPPSSPTNDPTVKYETQPRF	S	P	T	N	5	2	3	NA	0.231119	NA	-0.232833	NA	-0.0917786	-0.442873	-0.446339	STYX	-0.00085695	0.7964	-0.326997	0.236024	CENTER
B1ART2_1725	tr|B1ART2|B1ART2_MOUSE	B1ART2	1725	0.993	SCPSVSSVEYPDMPRSLPSHMEEAPNVFQLY	S	L	P	S	4	2	2	0.272538	0.177762	NA	NA	NA	-0.0710935	NA	-0.144065	STYX	0.22515	0.138042	-0.107579	0.746926	CENTER
B1ART2_2455	tr|B1ART2|B1ART2_MOUSE	B1ART2	2455	0.992	VVPKTVKSGVVTKRSSLPVSNERHLEVKVNV	S	L	P	V	4	2	2	NA	0.0331893	NA	0.108569	NA	NA	0.00130075	0.130131	STYX	0.0708792	0.690369	0.0657157	0.808557	CENTER
B1ART2_2671	tr|B1ART2|B1ART2_MOUSE	B1ART2	2671	1	RKALLVCQGQLKKAASWLFKNAEPLKSLSLV	S	W	L	F	4	2	2	1.04496	-0.620561	NA	NA	NA	-0.144825	-0.470905	NA	STYX	0.2122	0.984909	-0.307865	0.362762	CENTER
B1ASB6_39	tr|B1ASB6|B1ASB6_MOUSE	B1ASB6	39	1	PTLSKEGLSAKGPPPSPVLPPFRRKCRKCGI	S	P	V	L	7	4	3	0.383693	-0.270219	0.0316024	NA	-0.379758	-0.0872534	-0.573407	-0.117302	STYX	-0.0586705	0.385445	-0.259321	0.369445	CENTER
B1ASB6_81	tr|B1ASB6|B1ASB6_MOUSE	B1ASB6	81	1	LRFGQRPDGDPPECASPEAFAGPPRLLSSKD	S	P	E	A	7	5	2	0.12486	-0.0600913	-0.0131568	0.446407	-0.264177	0.100143	NA	0.409312	STYX	0.0467684	0.840889	0.254727	0.438915	CENTER
B1AV60_289	tr|B1AV60|B1AV60_MOUSE	B1AV60	289	0.994	AKDRHFLTFNSTRSPSPTECCHMAPWSRKSH	S	P	T	E	5	2	3	-0.305774	0.0662114	NA	NA	NA	-0.457757	-0.664075	-1.16369	STYX	-0.119781	0.362503	-0.76184	0.0273202	CENTER
B1AV60_412	tr|B1AV60|B1AV60_MOUSE	B1AV60	412	0.997	KTISGIPRRVQQEIDSDESPVARERNVIVHT	S	D	E	S	4	2	2	-0.0794213	NA	NA	-0.178824	NA	NA	-0.349886	0.384645	STYX	-0.129123	0.12538	0.0173793	0.973807	CENTER
B1AVB3_34	tr|B1AVB3|B1AVB3_MOUSE	B1AVB3	34	0.994	TGSISAPSEYFRQSKTPPTNEFKIGMKLEAR	T	P	P	T	8	5	3	0.304177	-0.114808	-0.0131337	-0.128425	0.0375433	0.340612	0.391808	0.207388	STYX	0.0170707	0.594402	0.313269	0.238944	CENTER
B1AVB3_619	tr|B1AVB3|B1AVB3_MOUSE	B1AVB3	619	0.997	MPALFSALSVSSTERTPPSSSEQPKSSTSGK	T	P	P	S	6	4	2	0.473193	-0.0195164	NA	-2.87077	-0.164043	NA	0.0286914	0.404184	STYX	-0.645285	0.342935	0.216438	0.514703	CENTER
B1AVB3_653	tr|B1AVB3|B1AVB3_MOUSE	B1AVB3	653	0.987	TSRGAQTSRKSPRKTSVVQPVPKTSKKAGKS	S	V	V	Q	5	3	2	NA	-0.451005	0.227697	0.328202	NA	NA	-0.672038	-0.849765	STYX	0.0349646	0.674943	-0.760902	0.0566767	CENTER
B1AVB3_674 675 676	tr|B1AVB3|B1AVB3_MOUSE	B1AVB3	674 675 676	0.887	PKTSKKAGKSKSTGNTSSPKKGITIKIVLPK KTSKKAGKSKSTGNTSSPKKGITIKIVLPKK TSKKAGKSKSTGNTSSPKKGITIKIVLPKKK	T	S	S	P	6	4	2	NA	0.0987347	0.00882277	0.0980218	0.109888	NA	1.11576	0.513996	STYX	0.0788669	0.501295	0.81488	0.0715244	CENTER
B1AVP0_237	tr|B1AVP0|B1AVP0_MOUSE	B1AVP0	237	0.998	GSSHPKKATGSKASASPSTSSTSSRPRAPKE	S	P	S	T	7	5	2	-0.923132	-0.245726	0.342116	-0.115267	0.170383	-0.769636	-1.16125	NA	STYX	-0.154325	0.357465	-0.965445	0.0345485	NR
B1AVP0_25	tr|B1AVP0|B1AVP0_MOUSE	B1AVP0	25	0.998	KASIANSDGPPAGSQTPPFKRKGKLSTIGKI	T	P	P	F	5	2	3	0.306503	0.245436	NA	NA	NA	-0.646101	-0.504342	-0.477544	STYX	0.27597	0.088435	-0.542662	0.0621221	CENTER
B1AVP0_520	tr|B1AVP0|B1AVP0_MOUSE	B1AVP0	520	0.998	QELRQQIGTKLVRRLSQRPTTEELEQRNILK	S	Q	R	P	8	5	3	-0.576007	-0.218593	-0.1168	0.122274	0.0201728	-1.45548	-0.375609	-0.877481	STYQ	-0.153791	0.102812	-0.902855	0.0220788	NR
B1AVP0_558	tr|B1AVP0|B1AVP0_MOUSE	B1AVP0	558	0.998	QEAKMELKRRLSRKLSLRPTVAELQARRILR	S	L	R	P	7	4	3	-0.570178	-0.285842	0.220773	0.291604	NA	-1.64559	-1.62386	-1.65478	STYX	-0.0859108	0.640885	-1.64141	0.00303834	NR
B1AVZ5_384	tr|B1AVZ5|B1AVZ5_MOUSE,tr|B1AZM2|B1AZM2_MOUSE	B1AVZ5	384	0.996	ERYHGPRGRNGPRDASPPGSEPEIVRSSAIR	S	P	P	G	7	5	2	0.604816	-0.00499347	-0.0350882	-0.0988726	-0.11905	NA	-0.663378	-0.394249	STYX	0.0693625	0.570886	-0.528813	0.140495	CENTER
B1AW18_300	tr|B1AW18|B1AW18_MOUSE	B1AW18	300	0.999	MPLSKQESSFVIKLQTPPDFYRANKYRKYES	T	P	P	D	6	4	2	1.02165	-0.437397	NA	-0.175838	-0.914916	NA	0.719708	0.838272	STYX	-0.126626	0.131378	0.77899	0.0626162	CENTER
B1AW18_315	tr|B1AW18|B1AW18_MOUSE	B1AW18	315	0.988	TPPDFYRANKYRKYESPVHLGTEETDPNELE	S	P	V	H	7	5	2	0.0283683	-0.466326	0.138921	0.0936508	-0.225019	0.288536	NA	0.980727	STYX	-0.0860811	0.381264	0.634631	0.135151	CENTER
B1AW18_95	tr|B1AW18|B1AW18_MOUSE	B1AW18	95	0.988	SVESPLFPTISHRVCSPTANKNQQKPADDSG	S	P	T	A	5	2	3	-0.329827	0.515316	NA	NA	NA	1.54868	1.30566	1.44966	STYX	0.0927444	0.967147	1.43467	0.00418921	NR
B1AXN3_929	tr|B1AXN3|B1AXN3_MOUSE	B1AXN3	929	1	GKEKWKRTAKEIAPNSPRKGDTIFISGQVEN	S	P	R	K	8	5	3	0.100051	-0.22772	0.461946	-0.0540188	-0.403077	1.78175	1.39691	1.03503	STYX	-0.0245638	0.428243	1.40457	0.00506535	NR
B1AXP3_166	tr|B1AXP3|B1AXP3_MOUSE	B1AXP3	166	0.991	PRRELLRPPHKYRPESSKFENRTTHQDDYTM	S	S	K	F	8	5	3	-0.00264267	-0.482057	0.768172	-0.414426	-0.267374	1.63054	1.60856	0.919538	STYX	-0.0796653	0.122121	1.38621	0.00551048	NR
B1AXP3_166 167	tr|B1AXP3|B1AXP3_MOUSE	B1AXP3	166 167	0.896	PRRELLRPPHKYRPESSKFENRTTHQDDYTM RRELLRPPHKYRPESSKFENRTTHQDDYTMK	S	S	K	F	5	3	2	NA	0.0243549	0.966182	NA	-0.138929	1.77871	1.5009	NA	STYX	0.283869	0.797138	1.63981	0.017264	NR
B1AXP3_319	tr|B1AXP3|B1AXP3_MOUSE	B1AXP3	319	0.998	DLLTTVQTHYKYLKGSPAITCRPVPSIKKSK	S	P	A	I	7	4	3	0.468595	-0.42155	0.177004	NA	-0.11935	0.497051	0.688011	0.666544	STYX	0.0261745	0.86325	0.617202	0.0498138	CENTER
B1AXP3_449	tr|B1AXP3|B1AXP3_MOUSE	B1AXP3	449	0.994	FEEVDSMGHKIYRSISQTGSRQNSSISICDT	S	Q	T	G	8	5	3	0.0187432	-0.552433	1.25241	0.174579	-0.0972343	1.28993	0.852336	0.64778	STYQ	0.159214	0.937554	0.930016	0.0160163	NR
B1AXP3_453	tr|B1AXP3|B1AXP3_MOUSE	B1AXP3	453	0.996	DSMGHKIYRSISQTGSRQNSSISICDTEKPG	S	R	Q	N	4	2	2	-0.184686	0.173774	NA	NA	NA	NA	1.25769	1.64774	STYX	-0.00545605	0.74457	1.45272	0.0197659	NR
B1AXP3_64	tr|B1AXP3|B1AXP3_MOUSE	B1AXP3	64	0.999	LPRNSFKPEWCYRKPSAPMEGLTTCRRDFGL	S	A	P	M	8	5	3	0.207122	-0.174981	0.629848	-0.108746	-0.178904	0.819486	0.870776	0.677801	STYX	0.0748679	0.636936	0.789354	0.0220478	CENTER
B1AXU1_61	tr|B1AXU1|B1AXU1_MOUSE,tr|L7MTX3|L7MTX3_MOUSE	B1AXU1	61	1	FNQATVKKPLPPRAQTPLVKVKKEIKPQRLC	T	P	L	V	7	5	2	0.533538	-0.438018	0.247471	0.491829	-0.796529	0.460834	NA	1.78437	STYX	0.00765812	0.713252	1.1226	0.0632421	NR
B1AY64_112	tr|B1AY64|B1AY64_MOUSE	B1AY64	112	0.995	KGEQSLRRRIRRRIKSATELRLMRSQLELIE	S	A	T	E	8	5	3	0.613789	-0.186248	-0.248561	0.13647	-0.571601	1.90155	1.4102	1.07394	STYX	-0.0512302	0.316084	1.4619	0.00476702	NR
B1AZA0_22	tr|B1AZA0|B1AZA0_MOUSE,tr|B1B0R1|B1B0R1_MOUSE,tr|L7MUF1|L7MUF1_MOUSE,tr|Q4KL05|Q4KL05_MOUSE,tr|Q5M8P2|Q5M8P2_MOUSE,tr|Q62478|Q62478_MOUSE	B1AZA0	22	0.998	WVIPKDGYLLLLDYDSDEEEEQAHSEVKRPA	S	D	E	E	4	2	2	0.227114	-0.55432	NA	NA	NA	NA	0.882972	1.52799	STYX	-0.163603	0.6652	1.20548	0.0292623	NR
B1B0V2_223 224	tr|B1B0V2|B1B0V2_MOUSE	B1B0V2	223 224	0.883	EALRCAESSRAESDQSSPAGRELRQQASPRA ALRCAESSRAESDQSSPAGRELRQQASPRAP	S	S	P	A	6	4	2	-0.825951	1.29738	NA	-0.0512405	0.331294	1.19442	NA	0.354148	STYX	0.18787	0.747223	0.774286	0.0983754	CENTER
B1B0V2_256	tr|B1B0V2|B1B0V2_MOUSE	B1B0V2	256	0.997	DDDDGDGGPDPRGSGTPEGWVLRSGVVPFGR	T	P	E	G	6	3	3	0.34615	NA	NA	0.0276328	-0.0150901	-0.454228	-0.944048	-0.385945	STYX	0.119564	0.577921	-0.59474	0.0585403	CENTER
B1B0V2_306	tr|B1B0V2|B1B0V2_MOUSE	B1B0V2	306	0.999	GWNLRPRPRSSASAVSPEARPKAQSAGRNLR	S	P	E	A	8	5	3	-0.0314115	-0.147861	-0.197025	-0.0480541	0.061701	0.0640967	-0.197932	-0.372642	STYX	-0.0725301	0.121796	-0.168826	0.538209	CENTER
B1B0V2_332	tr|B1B0V2|B1B0V2_MOUSE	B1B0V2	332	0.999	GRNLRPRPRSSASVVSPEARPKAQSAGRNLR	S	P	E	A	8	5	3	-0.11048	-0.2259	-0.0912014	-0.0745537	-0.012712	-0.141883	-0.00350938	-0.668123	STYX	-0.102969	0.0416268	-0.271172	0.370587	CENTER
B1B0V2_358	tr|B1B0V2|B1B0V2_MOUSE	B1B0V2	358	0.997	GRNLRPRPRSSASVVSPEARPEAQSAGRNLR	S	P	E	A	8	5	3	-0.115934	0.531722	-0.00827802	-0.137458	0.0772226	-0.39916	-0.162695	-0.267258	STYX	0.0694548	0.775442	-0.276371	0.304385	CENTER
B1B0V2_438	tr|B1B0V2|B1B0V2_MOUSE	B1B0V2	438	0.998	KIKMRLDLQVDREPESEAEQEEQELESEPGP	S	E	A	E	4	2	2	-0.424876	0.00890825	NA	NA	NA	-0.252422	-0.186131	NA	STYX	-0.207984	0.197319	-0.219276	0.497836	CENTER
B1B0V2_479	tr|B1B0V2|B1B0V2_MOUSE	B1B0V2	479	0.999	SRFAVPGRSSLAAEDSPPRRPVRMRASSPSP	S	P	P	R	8	5	3	-0.239039	0.285492	-0.0447525	-0.0417463	0.0504024	0.0921811	-0.0034946	-0.571848	STYX	0.00207134	0.582482	-0.161054	0.610313	CENTER
B1B0V2_490 491	tr|B1B0V2|B1B0V2_MOUSE	B1B0V2	490 491	0.864	AAEDSPPRRPVRMRASSPSPPGRLYPLPKHY AEDSPPRRPVRMRASSPSPPGRLYPLPKHYF	S	S	P	S	4	2	2	-0.0160074	0.580874	NA	NA	NA	0.0954414	NA	0.18278	STYX	0.282433	0.394408	0.139111	0.631875	CENTER
B2KF05_19	tr|B2KF05|B2KF05_MOUSE	B2KF05	19	0.995	PRRKSRQNAEGRRSPSPYSLKCSPTRETLTY	S	P	Y	S	4	2	2	NA	NA	NA	-0.168079	-0.0551604	NA	0.0532928	0.856688	STYX	-0.11162	0.165045	0.45499	0.279078	CENTER
B2KF05_712	tr|B2KF05|B2KF05_MOUSE	B2KF05	712	0.999	ENIGYDPERGTHLPESPRLEDFYRFSWEDVD	S	P	R	L	5	2	3	0.106963	-0.228923	NA	NA	NA	0.707919	0.729571	0.514927	STYX	-0.0609799	0.518621	0.650806	0.0423956	CENTER
B2KF50_929	tr|B2KF50|B2KF50_MOUSE	B2KF50	929	0.999	SDQGAVSPEKVLRDGSGENLAASQERLPSDG	S	G	E	N	7	4	3	0.18013	0.510915	0.251802	0.245526	NA	-0.526218	-0.255988	0.216609	STYX	0.297093	0.0183902	-0.188532	0.520528	CENTER
B2KF50_942	tr|B2KF50|B2KF50_MOUSE	B2KF50	942	1	DGSGENLAASQERLPSDGELPDPGPCAQQPV	S	D	G	E	4	2	2	NA	0.181722	NA	0.0558096	NA	-0.801645	NA	-0.167259	STYX	0.118766	0.433126	-0.484452	0.21367	CENTER
B2L13_387	sp|P59017|B2L13_MOUSE	P59017	387	0.994	GAAQLSEERAGSRKKSHTGEAAAVRGAKSGL	S	H	T	G	7	4	3	-0.0134628	0.186438	0.645636	NA	0.291368	-0.81473	0.274958	-0.555846	STYX	0.277495	0.08668	-0.365206	0.271705	CENTER
B2L13_389	sp|P59017|B2L13_MOUSE	P59017	389	0.998	AQLSEERAGSRKKSHTGEAAAVRGAKSGLPA	T	G	E	A	6	3	3	-4.79098	-0.0269993	2.64068	NA	NA	0.775018	0.0158785	-0.802011	STYX	-0.725764	0.789818	-0.00370483	0.985652	CENTER
B2L14_107 108	sp|Q9CPT0|B2L14_MOUSE	Q9CPT0	107 108	0.896	WRTLFRVAEKEEGLPSSPKEIRAQGPQGPFP RTLFRVAEKEEGLPSSPKEIRAQGPQGPFPV	S	S	P	K	7	5	2	-0.286878	-0.667531	-0.36714	-0.0158705	0.238929	1.39809	NA	1.05657	STYX	-0.219698	0.0657003	1.22733	0.0250248	NR
B2L14_108	sp|Q9CPT0|B2L14_MOUSE	Q9CPT0	108	0.984	RTLFRVAEKEEGLPSSPKEIRAQGPQGPFPV	S	P	K	E	6	3	3	-0.221721	-0.42156	NA	-0.0760366	NA	1.33971	1.59039	1.10216	STYX	-0.239773	0.0237718	1.34409	0.00500894	NR
B2L14_76	sp|Q9CPT0|B2L14_MOUSE	Q9CPT0	76	0.966	WSTDSWTQVSLPCRGSPSSEKNISLGKKKSS	S	P	S	S	4	2	2	0.0385011	0.234853	NA	NA	NA	NA	0.197567	0.983808	STYX	0.136677	0.408838	0.590687	0.169323	CENTER
B2RPU8_45	tr|B2RPU8|B2RPU8_MOUSE,sp|Q9D1L0|CHCH2_MOUSE	B2RPU8	45	0.999	PAAQPPAAAAPSAVGSPAAAPRQPGLMAQMA	S	P	A	A	8	5	3	-0.623553	0.396277	0.0376445	-0.0422696	0.157332	0.0274981	-0.108313	-0.464797	STYX	-0.0149138	0.995662	-0.181871	0.520875	CENTER
B2RQG2_1112	tr|B2RQG2|B2RQG2_MOUSE	B2RQG2	1112	1	CKICIGRMAPPIDDLSPKTVKVVVGGARKHS	S	P	K	T	7	4	3	0.914957	-0.229288	NA	-0.0281165	-0.240753	0.181563	0.067374	-0.0119155	STYX	0.1042	0.389707	0.0790071	0.728362	CENTER
B2RQG2_1163	tr|B2RQG2|B2RQG2_MOUSE	B2RQG2	1163	0.992	DLFEEEKQESPKSTFSPTPRPEMPGTVEVES	S	P	T	P	5	2	3	0.704532	0.365131	NA	NA	NA	0.169231	-0.772674	0.111759	STYX	0.534832	0.0344087	-0.163895	0.694393	CENTER
B2RQG2_122	tr|B2RQG2|B2RQG2_MOUSE	B2RQG2	122	0.983	LILPNRSLRDRVEDNSVRSPRKSPRLMAQEQ	S	V	R	S	6	3	3	NA	0.0839157	NA	0.286537	0.0939576	0.557675	0.51683	0.111799	STYX	0.154803	0.228188	0.395435	0.176209	CENTER
B2RQG2_125	tr|B2RQG2|B2RQG2_MOUSE	B2RQG2	125	0.998	PNRSLRDRVEDNSVRSPRKSPRLMAQEQVRS	S	P	R	K	8	5	3	0.795014	-0.106657	-0.0504921	0.108554	0.200823	0.350244	0.578522	0.16677	STYX	0.189448	0.497658	0.365179	0.19568	CENTER
B2RQG2_1592	tr|B2RQG2|B2RQG2_MOUSE	B2RQG2	1592	0.996	QDQENSLQDNRTSSDSPCWPGTGKGGMDGDG	S	P	C	W	4	2	2	0.302426	0.142052	NA	NA	NA	-0.532421	NA	-0.282192	STYX	0.222239	0.157598	-0.407307	0.233666	CENTER
B2RQG2_249	tr|B2RQG2|B2RQG2_MOUSE	B2RQG2	249	0.999	DPKHACNNQGEVNVPSPELDCPLLSETSASV	S	P	E	L	6	3	3	0.185609	0.298921	NA	NA	-0.639807	-0.179347	-0.395253	-0.488293	STYX	-0.0517592	0.781286	-0.354297	0.197767	CENTER
B2RQG2_282	tr|B2RQG2|B2RQG2_MOUSE	B2RQG2	282	0.993	KNIEALMECKAKTNSSPLFKFPVREDEQSDL	S	P	L	F	5	2	3	1.3056	-0.387756	NA	NA	NA	0.122284	-0.0020062	0.472528	STYX	0.458922	0.966103	0.197602	0.465077	CENTER
B2RT41_1049	tr|B2RT41|B2RT41_MOUSE	B2RT41	1049	0.998	VDDEVLSGASRERRRSFLESNSFTKPNLKHT	S	F	L	E	7	4	3	0.151501	0.197093	-0.203241	0.196173	NA	-1.00496	-0.864112	-1.03169	STYX	0.0853817	0.509734	-0.966919	0.00844914	NR
B2RT41_198	tr|B2RT41|B2RT41_MOUSE	B2RT41	198	1	GAGSGFGSSQSWREPSPPRKSSKSFGRSPSR	S	P	P	R	5	2	3	0.362451	0.0259002	NA	NA	NA	-0.108915	0.217841	0.316215	STYX	0.194176	0.345833	0.141714	0.578103	CENTER
B2RT41_210	tr|B2RT41|B2RT41_MOUSE	B2RT41	210	0.997	REPSPPRKSSKSFGRSPSRKQNHSSKSENCA	S	P	S	R	8	5	3	0.522559	-0.217511	0.0276914	0.114849	-0.0856563	0.0538778	-0.201782	-0.0943959	STYX	0.0723865	0.920928	-0.0807665	0.775236	CENTER
B2RT41_356	tr|B2RT41|B2RT41_MOUSE	B2RT41	356	0.997	SQGLEDKEQNLTRRLSASDIVSEKKLGEEEE	S	A	S	D	8	5	3	0.411444	-0.198969	-0.220618	-0.249816	-0.174476	-0.79163	-0.396186	-1.16181	STYX	-0.0864871	0.0623111	-0.78321	0.0261646	CENTER
B2RT41_506 507	tr|B2RT41|B2RT41_MOUSE	B2RT41	506 507	0.893	RFMKLVGGKRRARSKSSDPDLRRSLEKQSDS FMKLVGGKRRARSKSSDPDLRRSLEKQSDSA	S	S	D	P	7	5	2	-0.149066	0.0723514	-0.0506352	0.294737	0.510676	NA	-0.450581	-0.11355	STYX	0.135613	0.580211	-0.282066	0.403655	CENTER
B2RT41_507	tr|B2RT41|B2RT41_MOUSE	B2RT41	507	0.982	FMKLVGGKRRARSKSSDPDLRRSLEKQSDSA	S	D	P	D	4	2	2	-0.106466	-0.166484	NA	NA	NA	NA	0.272993	-0.501156	STYX	-0.136474	0.104489	-0.114081	0.770733	CENTER
B2RT41_658	tr|B2RT41|B2RT41_MOUSE	B2RT41	658	0.999	RAFKPEETSSNSDPPSPPVLNNSQPLSRSNL	S	P	P	V	8	5	3	-0.469758	0.130129	-0.0720758	0.0330193	0.000870858	-0.0413201	-0.150787	-0.215318	STYX	-0.075563	0.368225	-0.135809	0.6105	CENTER
B2RT41_769	tr|B2RT41|B2RT41_MOUSE	B2RT41	769	1	PKVPPKSEKENDPLRTPEALPEEKKMEYRLL	T	P	E	A	4	2	2	0.945302	0.0655996	NA	NA	NA	NA	-0.715674	-0.275625	STYX	0.505451	0.171364	-0.49565	0.176392	CENTER
B2RT41_804 805 806 807 808	tr|B2RT41|B2RT41_MOUSE	B2RT41	804 805 806 807 808	0.893	ANREKQRLIKSDQLKTSSSSPANSDVEMDGI NREKQRLIKSDQLKTSSSSPANSDVEMDGIG REKQRLIKSDQLKTSSSSPANSDVEMDGIGR EKQRLIKSDQLKTSSSSPANSDVEMDGIGRI KQRLIKSDQLKTSSSSPANSDVEMDGIGRIA	T	S	S	S	7	4	3	-0.50766	0.273802	-0.241254	NA	-0.000865995	0.292955	0.341117	-0.156285	STYX	-0.118995	0.273833	0.159263	0.546895	CENTER
B2RT41_952	tr|B2RT41|B2RT41_MOUSE	B2RT41	952	0.999	EQDRLGPNKMMRLDNSPISSPRKHSAELIAM	S	P	I	S	8	5	3	0.672497	-0.230798	-0.175562	-0.124162	-0.0240172	0.140015	0.155922	-0.0534974	STYX	0.0235913	0.229846	0.0808134	0.721643	CENTER
B2RXA7_419	tr|B2RXA7|B2RXA7_MOUSE	B2RXA7	419	1	MYSIRDTHETAAVYRSPPEGFDPERFGVESG	S	P	P	E	6	3	3	NA	-0.466865	-0.0834649	-0.0617927	NA	-0.0200872	0.192075	0.282858	STYX	-0.204041	0.0586831	0.151615	0.54485	CENTER
B2RXB0_221	tr|B2RXB0|B2RXB0_MOUSE	B2RXB0	221	0.997	NSEAIMLLAAERNSSSLLELSNRHQTSRDRH	S	L	L	E	6	3	3	0.05345	-0.13769	-0.216705	NA	NA	0.244401	0.313293	1.22141	STYX	-0.100315	0.163165	0.593034	0.102911	CENTER
B2RXC2_179	tr|B2RXC2|B2RXC2_MOUSE	B2RXC2	179	0.996	SAIQAPRSPRLGRARSPSPCPFRSSSQPPER	S	P	S	P	7	4	3	-0.124661	-0.0512369	0.042221	-0.0461478	NA	-0.32466	-0.494638	-0.537009	STYX	-0.0449561	0.259283	-0.452102	0.107476	CENTER
B2RXC2_181	tr|B2RXC2|B2RXC2_MOUSE	B2RXC2	181	0.982	IQAPRSPRLGRARSPSPCPFRSSSQPPERVL	S	P	C	P	6	4	2	0.20614	0.155451	-0.218366	0.0600178	NA	NA	-0.0392758	-0.705147	STYX	0.0508106	0.764211	-0.372211	0.331939	CENTER
B2RXC2_200	tr|B2RXC2|B2RXC2_MOUSE	B2RXC2	200	0.997	FRSSSQPPERVLAPCSPSEERRTKSWGEQCT	S	P	S	E	8	5	3	0.0194945	-0.338724	0.102822	0.125557	-0.0937854	-0.214809	-1.10139	-0.51061	STYX	-0.0369271	0.511546	-0.608938	0.0730231	CENTER
B2RXC2_209	tr|B2RXC2|B2RXC2_MOUSE	B2RXC2	209	0.997	RVLAPCSPSEERRTKSWGEQCTETPDTNSGR	S	W	G	E	5	3	2	-0.798238	0.319748	-0.0138722	NA	NA	-0.0341748	-0.349022	NA	STYX	-0.164121	0.658027	-0.191598	0.561936	CENTER
B2RXC2_247	tr|B2RXC2|B2RXC2_MOUSE	B2RXC2	247	0.992	PSKDKEGVAPLLGPASPTRLGTQSPSTSVRM	S	P	T	R	6	3	3	0.283968	-0.279662	0.35733	NA	NA	-0.28948	-1.05336	-0.35119	STYX	0.120545	0.539888	-0.564676	0.0870088	CENTER
B2RXC2_274	tr|B2RXC2|B2RXC2_MOUSE	B2RXC2	274	0.988	SVRMERGTPASPRCGSPTPMETDKRVAPSLE	S	P	T	P	8	5	3	-0.707936	-0.355314	0.32543	0.190082	0.534895	-1.32669	-1.04557	-1.82315	STYX	-0.00256842	0.832961	-1.39847	0.00416628	NR
B2RXM2_323	tr|B2RXM2|B2RXM2_MOUSE,sp|Q8BG05|ROA3_MOUSE	B2RXM2	323	1	YSGQQQSNYGPMKGGSFGGRSSGSPYGGGYG	S	F	G	G	5	2	3	NA	0.0114108	0.480926	NA	NA	-0.340687	-0.0819189	0.955739	STYX	0.246168	0.338096	0.177711	0.750163	CENTER
B2RXM2_328 329	tr|B2RXM2|B2RXM2_MOUSE,sp|Q8BG05|ROA3_MOUSE	B2RXM2	328 329	0.875	QSNYGPMKGGSFGGRSSGSPYGGGYGSGGGS SNYGPMKGGSFGGRSSGSPYGGGYGSGGGSG	S	S	G	S	6	4	2	0.0245278	NA	-0.303246	-0.301679	0.297404	0.0084543	NA	-0.114812	STYX	-0.0707484	0.340994	-0.0531787	0.883796	CENTER
B2RXM2_331	tr|B2RXM2|B2RXM2_MOUSE,sp|Q8BG05|ROA3_MOUSE	B2RXM2	331	0.996	YGPMKGGSFGGRSSGSPYGGGYGSGGGSGGY	S	P	Y	G	8	5	3	-0.089915	-0.0886961	-0.17793	-1.68039	0.465086	0.160406	0.153189	-0.142618	STYX	-0.314368	0.130833	0.0569925	0.794765	CENTER
B2RXM2_333	tr|B2RXM2|B2RXM2_MOUSE,sp|Q8BG05|ROA3_MOUSE	B2RXM2	333	0.996	PMKGGSFGGRSSGSPYGGGYGSGGGSGGYGS	Y	G	G	G	8	5	3	-0.503567	0.320925	-0.00671386	-0.632028	0.015393	0.0733732	0.0229914	-0.178432	STYX	-0.161198	0.265069	-0.0273558	0.941537	CENTER
B2RXM2_339	tr|B2RXM2|B2RXM2_MOUSE,sp|Q8BG05|ROA3_MOUSE	B2RXM2	339	0.999	FGGRSSGSPYGGGYGSGGGSGGYGSRRF___	S	G	G	G	7	4	3	-0.152611	0.481173	-0.106778	NA	0.287201	-0.0309318	0.659669	-0.2503	STYX	0.127246	0.803893	0.126146	0.7349	CENTER
B2RXM2_343	tr|B2RXM2|B2RXM2_MOUSE,sp|Q8BG05|ROA3_MOUSE	B2RXM2	343	0.997	SSGSPYGGGYGSGGGSGGYGSRRF_______	S	G	G	Y	7	4	3	0.167511	-0.526741	-0.685941	NA	0.090787	0.235142	0.255251	-0.471576	STYX	-0.238596	0.293378	0.0062723	0.936324	CENTER
B2RXQ2_1236	tr|B2RXQ2|B2RXQ2_MOUSE	B2RXQ2	1236	0.996	AETLPANFRVTSSMSSPSMQPKKVQMDGSVS	S	P	S	M	7	4	3	NA	-0.17345	0.0305121	0.430246	-0.127764	-0.089833	-0.301543	-0.083202	STYX	0.039886	0.62974	-0.158193	0.561583	CENTER
B2RXQ2_238 239	tr|B2RXQ2|B2RXQ2_MOUSE	B2RXQ2	238 239	0.887	GNHEQESAPSTNGKRSSDGSLSHEDLAKVLE NHEQESAPSTNGKRSSDGSLSHEDLAKVLEL	S	S	D	G	8	5	3	0.320151	0.014538	0.228411	-0.797039	-0.148354	-0.669285	-0.258367	-0.579482	STYX	-0.0764585	0.763016	-0.502378	0.0884489	CENTER
B2RXQ2_238 239 242	tr|B2RXQ2|B2RXQ2_MOUSE	B2RXQ2	238 239 242	0.89	GNHEQESAPSTNGKRSSDGSLSHEDLAKVLE NHEQESAPSTNGKRSSDGSLSHEDLAKVLEL QESAPSTNGKRSSDGSLSHEDLAKVLELQEV	S	S	D	G	5	2	3	0.0777255	0.19622	NA	NA	NA	-1.09324	-0.357306	-0.531297	STYX	0.136973	0.350123	-0.660615	0.0474924	CENTER
B2RXQ2_239	tr|B2RXQ2|B2RXQ2_MOUSE	B2RXQ2	239	0.985	NHEQESAPSTNGKRSSDGSLSHEDLAKVLEL	S	D	G	S	5	2	3	0.440529	-0.0710236	NA	NA	NA	-0.523085	-0.127074	-0.472651	STYX	0.184753	0.632574	-0.37427	0.183764	CENTER
B2RXQ2_690	tr|B2RXQ2|B2RXQ2_MOUSE	B2RXQ2	690	0.991	ENTEQRAEEIESRVGSGSLDNLGRFRSMSSI	S	G	S	L	7	4	3	NA	-0.199128	0.193034	0.26944	-0.158712	-1.12561	-0.963362	-0.0917874	STYX	0.0261586	0.808016	-0.72692	0.0555741	CENTER
B2RXQ2_692	tr|B2RXQ2|B2RXQ2_MOUSE	B2RXQ2	692	0.997	TEQRAEEIESRVGSGSLDNLGRFRSMSSIPP	S	L	D	N	8	5	3	0.26457	-0.706075	-0.02968	0.448245	0.399211	-1.19788	-0.952915	-1.0471	STYX	0.0752543	0.397002	-1.06597	0.00641916	NR
B2RXQ2_711 712	tr|B2RXQ2|B2RXQ2_MOUSE	B2RXQ2	711 712	0.855	LGRFRSMSSIPPYPASSLAGSSPPGSGRSTP GRFRSMSSIPPYPASSLAGSSPPGSGRSTPR	S	S	L	A	7	4	3	0.139988	0.144653	NA	-0.0826384	0.24951	-0.296359	-0.139685	0.0231406	STYX	0.112878	0.385065	-0.137634	0.612657	CENTER
B2RXQ2_716	tr|B2RXQ2|B2RXQ2_MOUSE	B2RXQ2	716	0.985	SMSSIPPYPASSLAGSSPPGSGRSTPRRVPH	S	S	P	P	8	5	3	-0.0168215	0.0782473	0.148774	0.0741836	0.0681454	-0.0827116	-0.057322	-0.138076	STYX	0.0705057	0.541495	-0.0927033	0.738731	CENTER
B2RXQ2_716 717	tr|B2RXQ2|B2RXQ2_MOUSE	B2RXQ2	716 717	0.899	SMSSIPPYPASSLAGSSPPGSGRSTPRRVPH MSSIPPYPASSLAGSSPPGSGRSTPRRVPHS	S	S	P	P	8	5	3	0.166632	0.155829	0.128396	0.294006	0.0480056	-0.116708	-0.183606	-0.270902	STYX	0.158574	0.0982014	-0.190405	0.474112	CENTER
B2RXQ2_732	tr|B2RXQ2|B2RXQ2_MOUSE	B2RXQ2	732	1	SPPGSGRSTPRRVPHSPAREVDRLGVMTLPS	S	P	A	R	8	5	3	-0.868338	-0.632405	0.300482	-0.48665	-0.131018	1.01318	-0.0608384	-0.34154	STYX	-0.363586	0.0262631	0.203601	0.715245	CENTER
B2RXQ2_77	tr|B2RXQ2|B2RXQ2_MOUSE	B2RXQ2	77	1	ALTQGKLHEVGHERDSLQRQLNTALPQEFAA	S	L	Q	R	8	5	3	-0.298332	0.180328	0.396363	-0.346074	0.0241029	-0.392432	-0.762743	-0.416303	STYX	-0.00872224	0.69098	-0.523826	0.0756933	CENTER
B2RXQ2_774 775 778 779	tr|B2RXQ2|B2RXQ2_MOUSE	B2RXQ2	774 775 778 779	0.875	SREEVRDDKTTIKCETSPPSSPRPLRLDRMH REEVRDDKTTIKCETSPPSSPRPLRLDRMHK VRDDKTTIKCETSPPSSPRPLRLDRMHKGAP RDDKTTIKCETSPPSSPRPLRLDRMHKGAPH	T	S	P	P	4	2	2	-0.522046	0.225635	NA	NA	NA	-0.177728	-0.141127	NA	STYX	-0.148205	0.665795	-0.159427	0.625249	CENTER
B2RXQ2_775	tr|B2RXQ2|B2RXQ2_MOUSE,tr|B8QI36|B8QI36_MOUSE	B2RXQ2	775	0.992	REEVRDDKTTIKCETSPPSSPRPLRLDRMHK	S	P	P	S	5	2	3	-0.127837	-0.0136494	NA	NA	NA	-0.642195	-0.00485435	-0.455446	STYX	-0.0707435	0.298883	-0.367498	0.211752	CENTER
B2RXQ2_797	tr|B2RXQ2|B2RXQ2_MOUSE	B2RXQ2	797	0.998	PLRLDRMHKGAPHTVSHEDIRDLRNSTGSQD	S	H	E	D	8	5	3	-0.240437	-0.319844	0.115159	0.263626	-0.0548917	-0.669473	-0.89035	-0.889869	STYX	-0.0472776	0.381095	-0.816564	0.0153823	CENTER
B2RY53_141 142	tr|B2RY53|B2RY53_MOUSE,sp|Q9CPR4|RL17_MOUSE	B2RY53	141 142	0.89	RRRTYRAHGPINPYMSSPCHIEMILTEKEQI RRTYRAHGPINPYMSSPCHIEMILTEKEQIV	S	S	P	C	5	2	3	0.66934	-0.0858308	NA	NA	NA	0.312302	0.190727	1.03001	STYX	0.291754	0.611515	0.511012	0.128195	CENTER
B3A2_112	sp|P13808|B3A2_MOUSE	P13808	112	0.998	TPQGPGRKPRRRPGASPTGETPTIEEGEEDE	S	P	T	G	4	2	2	0.638761	0.130946	NA	NA	NA	0.0908686	-0.173494	NA	STYX	0.384853	0.109008	-0.0413127	0.918152	CENTER
B3A2_144	sp|P13808|B3A2_MOUSE	P13808	144	0.998	EASEAEGFRAPPQQPSPATTPSAVQFFLQED	S	P	A	T	5	2	3	0.218479	0.182622	NA	NA	NA	-0.572763	-0.095245	0.40564	STYX	0.200551	0.165544	-0.087456	0.780157	CENTER
B3A2_169 170	sp|P13808|B3A2_MOUSE	P13808	169 170	0.88	FFLQEDEGAERKPERTSPSPPTQTPHQEAAP FLQEDEGAERKPERTSPSPPTQTPHQEAAPR	T	S	P	S	5	3	2	-1.17277	NA	-0.0427933	NA	0.365615	-0.327894	-0.44227	NA	STYX	-0.283316	0.592443	-0.385082	0.246175	CENTER
B3A2_172	sp|P13808|B3A2_MOUSE	P13808	172	0.994	QEDEGAERKPERTSPSPPTQTPHQEAAPRAS	S	P	P	T	7	5	2	-0.846311	0.460859	-0.0732541	-0.091089	0.182111	0.0108856	0.3476	NA	STYX	-0.0735369	0.638859	0.179243	0.578619	CENTER
B4GT2_258	sp|Q9Z2Y2|B4GT2_MOUSE	Q9Z2Y2	258	0.999	FRLPYASYFGGVSGLSKAQFLRINGFPNEYW	S	K	A	Q	6	3	3	NA	-0.36232	0.467293	NA	-0.158236	-1.12426	-1.10789	-0.766447	STYX	-0.0177546	0.426482	-0.999532	0.00832028	NR
B7XG49_233	tr|B7XG49|B7XG49_MOUSE	B7XG49	233	0.999	KRKSGHRKKRDLYKVSVKSLPATTDVSAISS	S	V	K	S	7	4	3	0.537007	-0.148515	NA	-0.240989	-0.191606	1.41875	0.391518	0.713922	STYX	-0.0110256	0.211336	0.841398	0.0314322	NR
B7XG49_324	tr|B7XG49|B7XG49_MOUSE	B7XG49	324	0.991	INKATVEEAALGARGSKSHLTIASTGKMSPK	S	K	S	H	7	5	2	-0.195735	-0.839032	0.760953	-0.249281	0.696977	NA	0.977439	0.607168	STYX	0.0347766	0.555228	0.792304	0.0659181	CENTER
B7XG49_350	tr|B7XG49|B7XG49_MOUSE	B7XG49	350	1	KMSPKSMKIALAGMASKSLEYIPSSPASLSR	S	K	S	L	4	2	2	0.563993	-0.625703	NA	NA	NA	0.152879	NA	0.421531	STYX	-0.0308547	0.920362	0.287205	0.380735	CENTER
B7XG49_352	tr|B7XG49|B7XG49_MOUSE	B7XG49	352	0.993	SPKSMKIALAGMASKSLEYIPSSPASLSRKE	S	L	E	Y	6	4	2	-0.017194	-1.01662	0.545437	NA	-0.101087	NA	0.877744	0.323976	STYX	-0.147365	0.443945	0.60086	0.136224	CENTER
B7XG49_358 359	tr|B7XG49|B7XG49_MOUSE	B7XG49	358 359	0.899	IALAGMASKSLEYIPSSPASLSRKEIMTVTN ALAGMASKSLEYIPSSPASLSRKEIMTVTNS	S	S	P	A	8	5	3	0.422296	0.0368635	0.239153	-0.236795	-0.159884	0.315676	0.20224	0.549914	STYX	0.0603268	0.962788	0.355943	0.201564	CENTER
B7XG49_359	tr|B7XG49|B7XG49_MOUSE	B7XG49	359	0.994	ALAGMASKSLEYIPSSPASLSRKEIMTVTNS	S	P	A	S	8	5	3	0.222403	-0.0976747	0.405272	-0.226259	-0.243988	1.02273	1.35897	0.126155	STYX	0.0119505	0.535	0.835953	0.0461612	CENTER
B7XG49_374	tr|B7XG49|B7XG49_MOUSE	B7XG49	374	0.995	SPASLSRKEIMTVTNSRIETTGKSVGETAND	S	R	I	E	7	5	2	-0.441694	-0.436386	-0.00513453	-0.145092	-0.331377	NA	0.154178	1.01513	STYX	-0.271937	0.00425949	0.584653	0.185358	CENTER
B7ZNL9_252	tr|B7ZNL9|B7ZNL9_MOUSE	B7ZNL9	252	1	RSRDGPSRSGEGRSRSREELVKSVEEGPAAK	S	R	E	E	6	4	2	NA	-0.231799	-0.0370516	-0.0425639	0.0560768	-0.335677	NA	-0.273984	STYX	-0.0638345	0.237877	-0.304831	0.348352	CENTER
B9EJU1_189	tr|B9EJU1|B9EJU1_MOUSE	B9EJU1	189	0.979	KVQEQGDQKAPDAVPSRPTTPLRAVRPEAVV	S	R	P	T	8	5	3	0.118266	-0.477266	0.060224	0.317341	0.157831	-0.0055961	-0.0846905	0.191705	STYX	0.0352793	0.573211	0.0338062	0.869948	CENTER
B9EJU1_189 192 193	tr|B9EJU1|B9EJU1_MOUSE	B9EJU1	189 192 193	0.895	KVQEQGDQKAPDAVPSRPTTPLRAVRPEAVV EQGDQKAPDAVPSRPTTPLRAVRPEAVVEPI QGDQKAPDAVPSRPTTPLRAVRPEAVVEPIP	S	R	P	T	8	5	3	-0.409349	-0.0992028	-0.0752105	0.135917	-0.0180565	0.13446	0.0631336	-0.0293802	STYX	-0.0931803	0.161231	0.0560712	0.795487	CENTER
B9EJU1_192	tr|B9EJU1|B9EJU1_MOUSE	B9EJU1	192	0.963	EQGDQKAPDAVPSRPTTPLRAVRPEAVVEPI	T	T	P	L	5	2	3	-0.961225	-0.315875	NA	NA	NA	0.729998	0.709776	-0.332001	STYX	-0.63855	0.0198438	0.369258	0.299563	CENTER
B9EJU1_192 193	tr|B9EJU1|B9EJU1_MOUSE	B9EJU1	192 193	0.899	EQGDQKAPDAVPSRPTTPLRAVRPEAVVEPI QGDQKAPDAVPSRPTTPLRAVRPEAVVEPIP	T	T	P	L	8	5	3	-0.364341	-0.319394	-0.0727364	-0.210167	-0.083466	0.355992	0.287376	0.167967	STYX	-0.210021	0.00489996	0.270445	0.299501	CENTER
B9EJU1_193	tr|B9EJU1|B9EJU1_MOUSE	B9EJU1	193	0.991	QGDQKAPDAVPSRPTTPLRAVRPEAVVEPIP	T	P	L	R	5	2	3	-0.728874	-0.0250691	NA	NA	NA	0.433132	0.180858	0.1401	STYX	-0.376971	0.128272	0.251363	0.337482	CENTER
B9EKF4_91	tr|B9EKF4|B9EKF4_MOUSE	B9EKF4	91	0.997	VFPSCILPPKEVPPLSPTASRQGVLPQTDST	S	P	T	A	5	2	3	0.488788	-0.214702	NA	NA	NA	-0.0733396	-0.666496	-0.200638	STYX	0.137043	0.94888	-0.313491	0.288005	CENTER
BABA1_33	sp|Q3UI43|BABA1_MOUSE	Q3UI43	33	1	EEGEETISEPRPHTRSNPEGAEDRALGAQAS	S	N	P	E	5	2	3	0.134779	0.937562	NA	NA	NA	0.338132	0.934506	0.551315	STYX	0.536171	0.0955087	0.607985	0.0624411	CENTER
BACD1_145	sp|Q8BGV7|BACD1_MOUSE	Q8BGV7	145	0.999	IEDCQLALQQKREKLSPLCLIPTVTSPREEQ	S	P	L	C	7	4	3	0.347259	-0.0318688	NA	0.086523	-0.519921	0.57516	-0.00972687	0.425073	STYX	-0.0295018	0.831149	0.330169	0.260894	CENTER
BACH1_448	sp|P97302|BACH1_MOUSE	P97302	448	0.997	QRRSECPWLGIRISESPEPGQRTFTTLSSVN	S	P	E	P	7	4	3	0.0785646	NA	0.791335	0.078684	0.0276794	-0.992988	-0.453946	0.115655	STYX	0.244066	0.240048	-0.44376	0.204887	CENTER
BACH2_314	sp|P97303|BACH2_MOUSE	P97303	314	0.986	IKDRPGDVEMDRKQPSPAPTPSTPTGAACLD	S	P	A	P	8	5	3	-0.748168	0.535997	-0.0967723	0.0823776	0.137044	0.319432	-0.140566	0.846191	STYX	-0.0179043	0.986243	0.341686	0.307353	CENTER
BAD_111 112 113	sp|Q61337|BAD_MOUSE	Q61337	111 112 113	0.897	SHHGGAGAMETRSRHSSYPAGTEEDEGMEEE HHGGAGAMETRSRHSSYPAGTEEDEGMEEEL HGGAGAMETRSRHSSYPAGTEEDEGMEEELS	S	S	Y	P	6	4	2	0.187564	0.254927	0.201301	NA	-0.0972151	0.180229	NA	0.125698	STYX	0.136644	0.289828	0.152963	0.597461	CENTER
BAD_112	sp|Q61337|BAD_MOUSE	Q61337	112	0.994	HHGGAGAMETRSRHSSYPAGTEEDEGMEEEL	S	Y	P	A	4	2	2	0.478659	0.438782	NA	NA	NA	NA	-0.729506	-0.211476	STYX	0.45872	0.035526	-0.470491	0.205113	CENTER
BAD_136	sp|Q61337|BAD_MOUSE	Q61337	136	1	EGMEEELSPFRGRSRSAPPNLWAAQRYGREL	S	A	P	P	8	5	3	0.0586452	-0.142624	-0.137607	-0.052012	-0.00247049	0.180743	0.251706	0.468353	STYX	-0.0552137	0.17287	0.300267	0.262029	CENTER
BAD_155	sp|Q61337|BAD_MOUSE	Q61337	155	0.999	NLWAAQRYGRELRRMSDEFEGSFKGLPRPKS	S	D	E	F	8	5	3	0.329197	0.106413	-0.165741	-0.104089	-0.372213	0.0564163	0.0994447	0.316756	STYX	-0.0412866	0.357628	0.157539	0.529243	CENTER
BAD_170	sp|Q61337|BAD_MOUSE	Q61337	170	0.998	SDEFEGSFKGLPRPKSAGTATQMRQSAGWTR	S	A	G	T	8	5	3	0.0816848	-0.215888	-0.0253626	-0.0185922	-0.0878393	0.932799	1.03958	0.679676	STYX	-0.0531995	0.213978	0.884018	0.0161163	NR
BAG1_161	sp|Q60739|BAG1_MOUSE	Q60739	161	0.997	TEEMETPRLSVIVTHSNERYDLLVTPQQGNS	S	N	E	R	4	2	2	0.227098	-0.320226	NA	NA	NA	NA	0.470363	0.786758	STYX	-0.0465639	0.725077	0.62856	0.108791	CENTER
BAG2_18 19 20	sp|Q91YN9|BAG2_MOUSE	Q91YN9	18 19 20	0.893	QAKISAKAHEGRFCRSSSMADRSSRLLESLD AKISAKAHEGRFCRSSSMADRSSRLLESLDQ KISAKAHEGRFCRSSSMADRSSRLLESLDQL	S	S	S	M	4	2	2	-0.911427	NA	NA	0.720256	NA	0.427154	NA	-0.261055	STYX	-0.0955858	0.946794	0.0830498	0.827134	CENTER
BAG2_20	sp|Q91YN9|BAG2_MOUSE	Q91YN9	20	0.983	KISAKAHEGRFCRSSSMADRSSRLLESLDQL	S	M	A	D	5	2	3	-1.27712	1.02519	NA	NA	NA	0.609354	0.508457	-0.531534	STYX	-0.125966	0.970934	0.195426	0.541215	CENTER
BAG3_274	sp|Q9JLV1|BAG3_MOUSE	Q9JLV1	274	0.998	DDWEPRPLRAASPFRSPVRGASSREGSPARS	S	P	V	R	8	5	3	0.256356	-0.359972	-0.053127	-0.322734	0.0215625	-0.417573	-1.00352	-0.99775	STYX	-0.0915829	0.216432	-0.806283	0.0219162	CENTER
BAG3_360	sp|Q9JLV1|BAG3_MOUSE	Q9JLV1	360	0.997	QVIRREADSKPVSQKSPPPAEKVEVKVSSAP	S	P	P	P	8	5	3	-0.27109	-0.0651196	-0.183394	-0.298626	-0.05367	0.272488	0.307172	0.388289	STYX	-0.17438	0.0092246	0.32265	0.227826	CENTER
BAG3_382	sp|Q9JLV1|BAG3_MOUSE	Q9JLV1	382	0.98	VEVKVSSAPIPCPSPSPAPSAVPSPPKNVAA	S	P	A	P	7	5	2	0.0910031	-0.124629	0.0636727	0.20635	0.21383	-0.0937477	NA	-0.102163	STYX	0.0900452	0.46814	-0.0979554	0.77537	CENTER
BAG3_386	sp|Q9JLV1|BAG3_MOUSE	Q9JLV1	386	0.902	VSSAPIPCPSPSPAPSAVPSPPKNVAAEQKA	S	A	V	P	5	2	3	0.0863986	-0.378525	NA	NA	NA	-0.250168	-0.395834	-0.340816	STYX	-0.146063	0.389336	-0.328939	0.218681	CENTER
BAG3_390	sp|Q9JLV1|BAG3_MOUSE	Q9JLV1	390	0.996	PIPCPSPSPAPSAVPSPPKNVAAEQKAAPSP	S	P	P	K	8	5	3	-0.362356	0.217048	-0.103608	0.0731529	0.153441	-0.695606	-0.515615	-0.535065	STYX	-0.00446434	0.836114	-0.582095	0.0498606	CENTER
BAG3_404	sp|Q9JLV1|BAG3_MOUSE	Q9JLV1	404	1	PSPPKNVAAEQKAAPSPAPAEPAAPKSGEAE	S	P	A	P	8	5	3	-0.170816	-0.386476	-0.187796	0.27043	0.199648	-0.052952	0.444249	0.132966	STYX	-0.0550019	0.348608	0.174754	0.515852	CENTER
BAG3_560	sp|Q9JLV1|BAG3_MOUSE	Q9JLV1	560	0.999	KDPQTESQQLEAKAATPPNPSNPADSAGNLV	T	P	P	N	8	5	3	0.0700003	0.0171855	0.0553288	0.227499	-0.134626	-0.112105	-0.222324	-0.196944	STYX	0.0470775	0.885334	-0.177124	0.503065	CENTER
BAG4_179	sp|Q8CI61|BAG4_MOUSE	Q8CI61	179	0.998	NYSTEVPNTYRSPGNSPTPMSRWMYSQQDCP	S	P	T	P	6	3	3	-0.308112	0.30769	-0.0190783	NA	NA	-0.311913	-0.231993	-0.00709044	STYX	-0.00650003	0.695875	-0.183665	0.492805	CENTER
BAG6_1102 1103	sp|Q9Z1R2|BAG6_MOUSE	Q9Z1R2	1102 1103	0.899	EAVSRAAKAAGARPLTSPESLSRDLEAPEVQ AVSRAAKAAGARPLTSPESLSRDLEAPEVQE	T	S	P	E	8	5	3	-0.175963	-0.264765	-0.266192	-0.174534	-0.0465969	0.83024	0.607899	0.540571	STYX	-0.18561	0.00526023	0.65957	0.0414258	CENTER
BAG6_1103	sp|Q9Z1R2|BAG6_MOUSE	Q9Z1R2	1103	0.995	AVSRAAKAAGARPLTSPESLSRDLEAPEVQE	S	P	E	S	8	5	3	-0.171246	-0.431143	-0.327324	-0.284493	-0.0555451	0.815872	0.648593	0.754005	STYX	-0.25395	0.00252826	0.73949	0.0272921	CENTER
BAG6_1138 1139	sp|Q9Z1R2|BAG6_MOUSE	Q9Z1R2	1138 1139	0.897	QLRSDIQKRLQEDPNYSPQRFPNAHRAFADD LRSDIQKRLQEDPNYSPQRFPNAHRAFADDP	Y	S	P	Q	8	5	3	-0.205109	-0.0753157	-0.0584195	-0.0126064	0.0602182	-0.0251883	-0.0901266	-0.353562	STYX	-0.0582465	0.175694	-0.156292	0.568272	CENTER
BAG6_1139	sp|Q9Z1R2|BAG6_MOUSE	Q9Z1R2	1139	0.996	LRSDIQKRLQEDPNYSPQRFPNAHRAFADDP	S	P	Q	R	7	4	3	-0.018728	-0.11669	-0.262202	NA	0.149014	-0.00516637	-0.11037	-0.365416	STYX	-0.0621514	0.272111	-0.160318	0.556725	CENTER
BAG6_509	sp|Q9Z1R2|BAG6_MOUSE	Q9Z1R2	509	1	PGFPTAPTRVVIARPTPPQARPSHPGGPPVS	T	P	P	Q	6	4	2	0.180207	-0.310406	-0.151903	NA	-0.60818	0.605604	0.340815	NA	STYX	-0.222571	0.0724077	0.47321	0.187981	CENTER
BAG6_985	sp|Q9Z1R2|BAG6_MOUSE	Q9Z1R2	985	0.973	QTLPEEPMEVQGAERTSPEPQRENASPAPGT	T	S	P	E	4	2	2	-0.66456	0.0873305	NA	NA	NA	NA	0.158135	0.195679	STYX	-0.288615	0.361468	0.176907	0.550508	CENTER
BAG6_985 986	sp|Q9Z1R2|BAG6_MOUSE	Q9Z1R2	985 986	0.898	QTLPEEPMEVQGAERTSPEPQRENASPAPGT TLPEEPMEVQGAERTSPEPQRENASPAPGTT	T	S	P	E	8	5	3	-0.646454	0.16734	0.147213	0.243045	-0.0622406	0.218059	0.190384	0.248163	STYX	-0.0302194	0.894336	0.218868	0.381401	CENTER
BAG6_986	sp|Q9Z1R2|BAG6_MOUSE	Q9Z1R2	986	0.99	TLPEEPMEVQGAERTSPEPQRENASPAPGTT	S	P	E	P	5	2	3	-0.503511	0.137471	NA	NA	NA	0.345468	0.2582	1.47749	STYX	-0.18302	0.490596	0.693721	0.0845944	CENTER
BAG6_995	sp|Q9Z1R2|BAG6_MOUSE	Q9Z1R2	995	0.999	QGAERTSPEPQRENASPAPGTTAEEAMSRGP	S	P	A	P	8	5	3	-0.230812	0.042911	-0.0722353	-0.414961	-0.11399	0.000362453	0.136264	0.0727636	STYX	-0.157817	0.0299598	0.0697968	0.754629	CENTER
BAHD1_101	sp|Q497V6|BAHD1_MOUSE	Q497V6	101	0.997	ADEADELPPDLPKPPSPTSSSEDAGLVQPRK	S	P	T	S	8	5	3	-0.00412901	0.327345	0.174862	0.421199	-0.0275306	-0.416636	-0.554862	-0.726455	STYX	0.178349	0.193292	-0.565984	0.0562606	CENTER
BAHD1_182	sp|Q497V6|BAHD1_MOUSE	Q497V6	182	1	KRPRLGDLGEGSRDLSPELAPDEGARRDGDP	S	P	E	L	8	5	3	0.288518	-0.411356	0.155242	0.0228725	-0.26978	-1.25885	0.0418494	0.0533335	STYX	-0.0429007	0.594044	-0.38789	0.421599	CENTER
BAIP2_326	sp|Q8BKX1|BAIP2_MOUSE	Q8BKX1	326	0.998	YNPWADRKAAQPKSLSPPQSQSKLSDSYSNT	S	P	P	Q	8	5	3	0.324147	-0.0836612	-0.110435	-0.171011	0.0418914	0.463243	0.462166	0.252981	STYX	0.000186118	0.4196	0.392796	0.160001	CENTER
BAIP2_367	sp|Q8BKX1|BAIP2_MOUSE	Q8BKX1	367	0.989	NSYATTENKTLPRSSSMAAGLERNGRMRVKA	S	M	A	A	7	4	3	0.197531	-0.426146	-0.0246668	0.501022	NA	-0.392559	-0.721739	-0.475659	STYX	0.0619351	0.840734	-0.529986	0.0703267	CENTER
BAIP2_453 454 455 456	sp|Q8BKX1|BAIP2_MOUSE	Q8BKX1	453 454 455 456	0.899	SDGSDRLHMSLQQGKSSSTGNLLDKDDLALP DGSDRLHMSLQQGKSSSTGNLLDKDDLALPP GSDRLHMSLQQGKSSSTGNLLDKDDLALPPP SDRLHMSLQQGKSSSTGNLLDKDDLALPPPD	S	S	S	T	8	5	3	-0.207059	-0.00303552	0.313527	0.675092	0.458736	-0.0832993	-0.64689	-0.549785	STYX	0.247452	0.22344	-0.426658	0.151015	CENTER
BAIP2_455	sp|Q8BKX1|BAIP2_MOUSE	Q8BKX1	455	0.975	GSDRLHMSLQQGKSSSTGNLLDKDDLALPPP	S	T	G	N	4	2	2	0.0260885	0.207099	NA	NA	NA	NA	-0.796294	-0.716989	STYX	0.116594	0.49142	-0.756642	0.0558738	CENTER
BAIP3_215	sp|Q80TT2|BAIP3_MOUSE,sp|Q8K3A9|MEPCE_MOUSE	Q80TT2	215	0.974	QKEQRFGFRKGSKRSSPLPAKCIQVTEVKNS	S	P	L	P	5	2	3	0.449578	-0.212758	NA	NA	NA	-0.864913	-0.297843	-0.017071	STYX	0.11841	0.967017	-0.393276	0.220337	CENTER
BAKOR_11	sp|Q8CDJ3|BAKOR_MOUSE	Q8CDJ3	11	0.998	_____MASPSGKGSWTPEAPGFGPRALARDL	T	P	E	A	8	5	3	0.361368	-0.213374	-0.0781484	-0.0737449	-0.291832	-0.469305	-0.542843	-0.280131	STYX	-0.0591464	0.146099	-0.43076	0.123859	CENTER
BANP_108	sp|Q8VBU8|BANP_MOUSE	Q8VBU8	108	0.999	TNKQHSPIQVPMVAGSPLGATQTCNKVRCVV	S	P	L	G	5	2	3	0.148072	0.313962	NA	NA	NA	-0.567461	-0.390138	-0.0241097	STYX	0.231017	0.147733	-0.327236	0.250439	CENTER
BAP18_96	sp|Q9DCT6|BAP18_MOUSE	Q9DCT6	96	0.999	KRKVYEDSGIPLPAESPKKGPKKMTSGVLSP	S	P	K	K	8	5	3	0.802628	0.213314	-0.0721783	-0.0260541	-0.0612328	-0.197718	-0.454074	-0.102882	STYX	0.171295	0.752065	-0.251558	0.357306	CENTER
BARD1_10	sp|O70445|BARD1_MOUSE	O70445	10	0.997	______MPRRPPRVCSGNQPAPVPAMEPATD	S	G	N	Q	5	3	2	NA	0.286615	0.135824	NA	0.269522	0.365285	NA	-0.543489	STYX	0.230654	0.0707009	-0.0891018	0.825859	CENTER
BARD1_397	sp|O70445|BARD1_MOUSE	O70445	397	0.989	PPPLLNNSTHRQMMSSPSTVKLSSGMPARKR	S	P	S	T	5	3	2	NA	-0.0740127	0.335459	0.0221092	NA	NA	0.328647	0.0683803	STYX	0.0945186	0.800236	0.198513	0.528643	CENTER
BASP1_131 132	sp|Q91XV3|BASP1_MOUSE	Q91XV3	131 132	0.874	AAGGEAPKAGEASAESTGAADGAAPEEGEAK AGGEAPKAGEASAESTGAADGAAPEEGEAKK	S	T	G	A	8	5	3	-0.428987	0.934578	0.486594	0.16481	-0.396671	0.0169814	-0.615894	-0.422988	STYX	0.152065	0.746177	-0.340634	0.242967	CENTER
BASP1_173	sp|Q91XV3|BASP1_MOUSE	Q91XV3	173	0.976	AKSDAAPAASDSKPSSAEPAPSSKETPAASE	S	A	E	P	5	2	3	-0.825477	0.749148	NA	NA	NA	-0.277997	-0.587548	-0.636248	STYX	-0.0381645	0.953575	-0.500598	0.0870828	CENTER
BASP1_217 218	sp|Q91XV3|BASP1_MOUSE	Q91XV3	217 218	0.85	PAAAEPQAEAPAAAASSEQSVAVKE______ AAAEPQAEAPAAAASSEQSVAVKE_______	S	S	E	Q	4	2	2	NA	-0.0722984	NA	NA	-0.0632343	0.473887	NA	0.182112	STYX	-0.0677663	0.27654	0.327999	0.327713	CENTER
BAZ1A_1320	sp|O88379|BAZ1A_MOUSE	O88379	1320	0.998	KNTAKSASKNLRKTRSAPPTETRSLRVGSRS	S	A	P	P	7	5	2	1.01256	0.6893	0.18168	0.0705378	0.231146	0.625473	NA	0.635857	STYX	0.437046	0.0123595	0.630665	0.101413	CENTER
BAZ1A_1366	sp|O88379|BAZ1A_MOUSE	O88379	1366	0.998	LSPHSKRRGRKGADHTPEHSPSFTNFRVSTS	T	P	E	H	8	5	3	0.274553	0.569526	0.278542	-0.439152	0.104942	0.62542	0.446829	0.400625	STYX	0.157682	0.201573	0.490958	0.0951691	CENTER
BAZ1A_1370	sp|O88379|BAZ1A_MOUSE	O88379	1370	0.997	SKRRGRKGADHTPEHSPSFTNFRVSTSRSSR	S	P	S	F	7	5	2	-0.0440018	0.655268	0.226784	-0.135909	-0.0170851	NA	0.207911	0.114729	STYX	0.137011	0.801266	0.16132	0.584118	CENTER
BAZ1A_1401	sp|O88379|BAZ1A_MOUSE	O88379	1401	0.991	QLIPLNTAESLSLQHSESKRRGRKRQSTESS	S	E	S	K	4	2	2	1.85009	0.354488	NA	NA	NA	NA	0.237995	0.0963469	STYX	1.10229	0.0298871	0.167171	0.580076	NR
BAZ1A_1412 1413	sp|O88379|BAZ1A_MOUSE	O88379	1412 1413	0.898	SLQHSESKRRGRKRQSTESSPVPLNRRSSGR LQHSESKRRGRKRQSTESSPVPLNRRSSGRQ	S	T	E	S	7	5	2	0.792488	0.402671	0.121593	-0.173813	0.134497	NA	0.578339	0.252819	STYX	0.255487	0.168538	0.415579	0.240551	CENTER
BAZ1A_1412 1413 1415 1416	sp|O88379|BAZ1A_MOUSE	O88379	1412 1413 1415 1416	0.877	SLQHSESKRRGRKRQSTESSPVPLNRRSSGR LQHSESKRRGRKRQSTESSPVPLNRRSSGRQ HSESKRRGRKRQSTESSPVPLNRRSSGRQGG SESKRRGRKRQSTESSPVPLNRRSSGRQGGV	S	T	E	S	7	5	2	0.19231	0.19285	0.013587	-0.0270836	0.239898	0.408604	0.996537	NA	STYX	0.122312	0.275373	0.70257	0.0995479	CENTER
BAZ1A_1415 1416	sp|O88379|BAZ1A_MOUSE	O88379	1415 1416	0.898	HSESKRRGRKRQSTESSPVPLNRRSSGRQGG SESKRRGRKRQSTESSPVPLNRRSSGRQGGV	S	S	P	V	7	4	3	0.0153896	NA	0.023612	-0.283484	0.173093	0.351532	1.00754	-0.0973794	STYX	-0.0178472	0.677088	0.420565	0.237985	CENTER
BAZ1A_1416	sp|O88379|BAZ1A_MOUSE	O88379	1416	0.995	SESKRRGRKRQSTESSPVPLNRRSSGRQGGV	S	P	V	P	8	5	3	-0.181042	0.227604	-0.0614946	-0.312763	0.180961	0.0925721	0.442202	0.307207	STYX	-0.0293469	0.465541	0.28066	0.29745	CENTER
BAZ1A_1537	sp|O88379|BAZ1A_MOUSE	O88379	1537	0.979	QAFFHIQAQKLGLHVSPSTVDQVSTPLAAKK	S	P	S	T	6	4	2	NA	0.0614505	0.466317	0.0671054	-0.406893	0.337453	0.413211	NA	STYX	0.0469948	0.853521	0.375332	0.264507	CENTER
BAZ1A_284	sp|O88379|BAZ1A_MOUSE	O88379	284	0.997	FSPANRRRGRPPKRISFGQEDSIASKQTAAR	S	F	G	Q	6	4	2	NA	0.104467	0.519844	0.282247	0.165374	0.188842	NA	0.191139	STYX	0.267983	0.0392909	0.189991	0.524686	CENTER
BAZ1A_732	sp|O88379|BAZ1A_MOUSE	O88379	732	0.999	ENKNIEQKDLDPDVVTEDEDDPGSHKRSRRG	T	E	D	E	8	5	3	0.27413	-0.308254	0.550502	0.408441	-0.0854185	0.0467839	0.169214	-0.0301658	STYX	0.16788	0.435767	0.0619439	0.779541	CENTER
BAZ1A_962	sp|O88379|BAZ1A_MOUSE	O88379	962	0.99	DKPQADSKPVSSRGRSSGACDISQMSAERQL	S	S	G	A	5	3	2	NA	0.675483	-0.0637489	NA	0.223672	0.345711	NA	0.011434	STYX	0.278469	0.26334	0.178573	0.579515	CENTER
BAZ1A_962 963	sp|O88379|BAZ1A_MOUSE	O88379	962 963	0.892	DKPQADSKPVSSRGRSSGACDISQMSAERQL KPQADSKPVSSRGRSSGACDISQMSAERQLE	S	S	G	A	7	5	2	0.96346	0.432519	0.200936	0.109861	0.156313	0.229958	1.13391	NA	STYX	0.372618	0.0145996	0.681934	0.139615	CENTER
BAZ1A_963	sp|O88379|BAZ1A_MOUSE	O88379	963	0.988	KPQADSKPVSSRGRSSGACDISQMSAERQLE	S	G	A	C	8	5	3	0.176319	0.418079	0.0689522	-0.130031	0.0393993	0.542593	1.26527	-0.205121	STYX	0.114544	0.483843	0.534247	0.204887	CENTER
BAZ1B_1338	sp|Q9Z277|BAZ1B_MOUSE	Q9Z277	1338	1	VDDLVLQTKRISRRQSLELQKCEDILHKLVK	S	L	E	L	7	4	3	1.14096	-0.164247	0.624415	0.121256	NA	-0.699496	-0.548873	-0.501614	STYX	0.430596	0.190707	-0.583328	0.0494566	CENTER
BAZ1B_1464	sp|Q9Z277|BAZ1B_MOUSE	Q9Z277	1464	0.998	KRRKFPDRLADDEGDSDSESVGQSRGRRQKK	S	D	S	E	7	4	3	0.32158	0.879809	0.222552	0.452016	NA	-0.0762449	-0.271558	-0.130389	STYX	0.46899	0.00594545	-0.159398	0.554125	CENTER
BAZ1B_189	sp|Q9Z277|BAZ1B_MOUSE	Q9Z277	189	1	QKKETVVKEDEGRRESINDRARRSPRKLPTS	S	I	N	D	4	2	2	0.460461	2.11624	NA	NA	NA	-0.0121162	NA	-0.248405	STYX	1.28835	0.0232968	-0.130261	0.694235	NR
BAZ1B_361	sp|Q9Z277|BAZ1B_MOUSE	Q9Z277	361	0.997	LNGPPLKVKNSKNSKSPEEHLEGVMKIMSPN	S	P	E	E	7	5	2	0.429821	0.206293	0.862662	-0.348002	0.174864	-0.0507169	-0.427643	NA	STYX	0.265128	0.129467	-0.23918	0.480555	CENTER
BAZ2A_1042	sp|Q91YE5|BAZ2A_MOUSE	Q91YE5	1042	0.998	DGLGRRRSSRIMEETSGIEEEEEEENTTAVH	S	G	I	E	8	5	3	0.0561215	0.000551486	0.212305	0.19005	-0.196841	-0.0204962	0.190781	0.221326	STYX	0.0524374	0.801586	0.130537	0.58995	CENTER
BAZ2A_1172 1173 1174	sp|Q91YE5|BAZ2A_MOUSE	Q91YE5	1172 1173 1174	0.89	SARASVKRELTGSNASTSPARSRGRPRKPKP ARASVKRELTGSNASTSPARSRGRPRKPKPG RASVKRELTGSNASTSPARSRGRPRKPKPGS	S	T	S	P	8	5	3	0.0680817	0.019159	0.252559	-0.0342948	0.260419	0.545585	0.268455	0.301487	STYX	0.113185	0.368169	0.371843	0.183367	CENTER
BAZ2A_1174	sp|Q91YE5|BAZ2A_MOUSE	Q91YE5	1174	0.993	RASVKRELTGSNASTSPARSRGRPRKPKPGS	S	P	A	R	8	5	3	0.981749	-0.0440234	0.041865	-0.11612	0.171994	0.452992	0.624569	0.447875	STYX	0.207093	0.658223	0.508478	0.0860022	CENTER
BAZ2A_134 135	sp|Q91YE5|BAZ2A_MOUSE	Q91YE5	134 135	0.898	GQYPLNGILGGNRQPSSPSHNTNLRAGSQEF QYPLNGILGGNRQPSSPSHNTNLRAGSQEFW	S	S	P	S	6	3	3	0.377832	-0.630685	NA	NA	0.4778	1.35581	0.640818	0.13107	STYX	0.0749824	0.491962	0.709232	0.0707842	CENTER
BAZ2A_135	sp|Q91YE5|BAZ2A_MOUSE	Q91YE5	135	0.99	QYPLNGILGGNRQPSSPSHNTNLRAGSQEFW	S	P	S	H	5	2	3	0.670958	-0.444405	NA	NA	NA	1.00385	1.04129	0.415449	STYX	0.113276	0.970803	0.820198	0.0259494	CENTER
BAZ2A_1383	sp|Q91YE5|BAZ2A_MOUSE	Q91YE5	1383	0.998	GTPKRLSGDSEEMSQSPTGLGQPKRRGRPPS	S	P	T	G	8	5	3	0.399684	0.272817	0.0591825	-0.137184	0.00685333	0.310228	0.317319	0.0999264	STYX	0.120271	0.502067	0.242491	0.350779	CENTER
BAZ2A_1734	sp|Q91YE5|BAZ2A_MOUSE	Q91YE5	1734	0.985	TQRPGFPKRGQKRKSSFPLTFPEGDSRRRML	S	F	P	L	8	5	3	0.909428	0.210683	0.120834	0.0276139	-0.0895467	-0.229042	-0.0763561	0.10062	STYX	0.235802	0.289798	-0.0682595	0.81515	CENTER
BAZ2A_1755	sp|Q91YE5|BAZ2A_MOUSE	Q91YE5	1755	0.997	PEGDSRRRMLSRSRDSPAVPRYPEDGLSPPK	S	P	A	V	8	5	3	0.326794	-0.378449	0.387785	-0.0353029	0.337047	0.822135	1.61338	1.42023	STYX	0.127575	0.398679	1.28525	0.00661417	NR
BAZ2A_1767	sp|Q91YE5|BAZ2A_MOUSE	Q91YE5	1767	0.999	SRDSPAVPRYPEDGLSPPKRRRHSMRSHHSD	S	P	P	K	8	5	3	2.16481	-0.223559	-0.0281255	-0.278623	-0.0820829	0.578016	0.471532	0.118214	STYX	0.310484	0.248352	0.389254	0.17896	CENTER
BAZ2A_695	sp|Q91YE5|BAZ2A_MOUSE	Q91YE5	695	0.998	TDNRLPKKLETQEILSEDDKAKMTKNKKKMR	S	E	D	D	6	4	2	NA	0.129746	0.262985	-0.259446	0.0246416	NA	-0.517139	-0.980831	STYX	0.0394816	0.880394	-0.748985	0.0686867	CENTER
BAZ2A_718	sp|Q91YE5|BAZ2A_MOUSE	Q91YE5	718	0.989	TKNKKKMRQKVQRGESQTPVQGQARNKRKQD	S	Q	T	P	5	2	3	-0.233135	-0.55743	NA	NA	NA	-0.307726	-0.256628	-0.103737	STYQ	-0.395282	0.0258751	-0.222697	0.404205	CENTER
BAZ2A_720	sp|Q91YE5|BAZ2A_MOUSE	Q91YE5	720	0.999	NKKKMRQKVQRGESQTPVQGQARNKRKQDTK	T	P	V	Q	6	4	2	0.240333	0.785054	NA	0.180533	0.208649	0.133269	0.825507	NA	STYX	0.353642	0.0193702	0.479388	0.231935	CENTER
BBOF1_519	sp|Q3V079|BBOF1_MOUSE	Q3V079	519	0.999	FITQQAPVSDSNRMVSPDVIPQGLQDSDIA_	S	P	D	V	8	5	3	0.426867	-0.00447	0.246901	0.125464	-0.274986	0.390355	0.160956	0.891479	STYX	0.103955	0.519707	0.48093	0.130525	CENTER
BBX_242	sp|Q8VBW5|BBX_MOUSE	Q8VBW5	242	0.999	TCRPDISESPELRQKSPLFQFAEISSRTSHP	S	P	L	F	8	5	3	-0.468027	0.0600128	0.022628	0.265067	0.161602	-0.25102	-1.08073	-0.763366	STYX	0.00825639	0.821907	-0.698373	0.043246	CENTER
BBX_576	sp|Q8VBW5|BBX_MOUSE	Q8VBW5	576	0.966	SVPGEVPEGIKAEPLTPTEDALPPSLPGQAK	T	P	T	E	5	2	3	-0.377577	-0.112577	NA	NA	NA	-0.277998	-0.399362	-0.174559	STYX	-0.245077	0.0589234	-0.283973	0.289646	CENTER
BBX_700 701	sp|Q8VBW5|BBX_MOUSE	Q8VBW5	700 701	0.888	KLDEEFEKKFNSLPQYSPITFDRKCVSTPRK LDEEFEKKFNSLPQYSPITFDRKCVSTPRKK	Y	S	P	I	8	5	3	-0.176189	-0.308999	-0.0954434	-0.283735	-0.175775	0.449158	0.53699	0.357325	STYX	-0.208029	0.00284216	0.447824	0.118941	CENTER
BBX_701	sp|Q8VBW5|BBX_MOUSE	Q8VBW5	701	0.994	LDEEFEKKFNSLPQYSPITFDRKCVSTPRKK	S	P	I	T	5	2	3	0.138368	-0.22728	NA	NA	NA	0.577927	0.62474	0.786036	STYX	-0.0444563	0.603271	0.662901	0.0396066	CENTER
BBX_811	sp|Q8VBW5|BBX_MOUSE	Q8VBW5	811	0.999	KTKITHLVRTADGRVSPAGGTLDDKPKEQLQ	S	P	A	G	8	5	3	-0.463557	-0.194019	-0.152465	-0.0804114	0.0918746	-0.186118	-0.0926944	-0.406979	STYX	-0.159715	0.0364185	-0.228597	0.39955	CENTER
BCAR1_432	sp|Q61140|BCAR1_MOUSE	Q61140	432	0.998	PPPAEREAPTDGKRLSASSTGSTRSSQSASS	S	A	S	S	8	5	3	-0.160559	-0.32935	0.07362	0.0962105	0.0885988	-0.681182	-1.57326	-1.43349	STYX	-0.0462959	0.464528	-1.22931	0.00708818	NR
BCAR3_284	sp|Q9QZK2|BCAR3_MOUSE	Q9QZK2	284	0.997	EGSLAEGRPDVVKRLSLTTGSSIQAREHSLP	S	L	T	T	5	3	2	0.280008	-0.568311	NA	0.194349	NA	NA	-1.14843	-0.909646	STYX	-0.0313181	0.779233	-1.02904	0.0282694	NR
BCAR3_365	sp|Q9QZK2|BCAR3_MOUSE	Q9QZK2	365	0.985	MDTSPCPSSPVFRTGSEPTLSPALVRRFSSD	S	E	P	T	7	4	3	NA	-0.293104	-0.0627177	0.0936641	0.0184158	-0.0535193	-0.570289	-0.649101	STYX	-0.0609355	0.33725	-0.424303	0.155985	CENTER
BCAR3_370	sp|Q9QZK2|BCAR3_MOUSE	Q9QZK2	370	0.999	CPSSPVFRTGSEPTLSPALVRRFSSDARTGE	S	P	A	L	8	5	3	0.212537	-0.173221	0.266043	0.0917488	-0.339276	-0.809013	-0.812698	-0.544835	STYX	0.0115665	0.915996	-0.722182	0.024485	CENTER
BCAR3_378 379	sp|Q9QZK2|BCAR3_MOUSE	Q9QZK2	378 379	0.899	TGSEPTLSPALVRRFSSDARTGEALRGSDSQ GSEPTLSPALVRRFSSDARTGEALRGSDSQL	S	S	D	A	6	3	3	NA	-0.809416	0.22842	NA	-0.27197	-0.260682	-0.947454	-0.922721	STYX	-0.284322	0.213764	-0.710286	0.0394784	CENTER
BCAS3_456	sp|Q8CCN5|BCAS3_MOUSE	Q8CCN5	456	1	PCVRTHMSPRVVNRMSRFQKSAGLEEIEQEL	S	R	F	Q	6	4	2	0.1107	-0.165995	0.133788	NA	0.0795875	NA	-1.29373	-1.41448	STYX	0.0395203	0.869444	-1.3541	0.017856	NR
BCAS3_480 486 487 488	sp|Q8CCN5|BCAS3_MOUSE	Q8CCN5	480 486 487 488	0.887	EEIEQELTSKQGGRCSPVPGLSSSPSGSPLH LTSKQGGRCSPVPGLSSSPSGSPLHGKLTSQ TSKQGGRCSPVPGLSSSPSGSPLHGKLTSQD SKQGGRCSPVPGLSSSPSGSPLHGKLTSQDS	S	P	V	P	4	2	2	-1.00982	NA	NA	NA	0.067539	NA	-0.190026	-0.219257	STYX	-0.471139	0.30983	-0.204641	0.523406	CENTER
BCAS3_488	sp|Q8CCN5|BCAS3_MOUSE	Q8CCN5	488	0.995	SKQGGRCSPVPGLSSSPSGSPLHGKLTSQDS	S	P	S	G	4	2	2	0.151456	0.00323413	NA	NA	NA	NA	0.0163622	-0.0428829	STYX	0.0773451	0.691576	-0.0132604	0.984517	CENTER
BCAS3_503 504	sp|Q8CCN5|BCAS3_MOUSE	Q8CCN5	503 504	0.875	SPSGSPLHGKLTSQDSYNNFTNNNPGNPRLS PSGSPLHGKLTSQDSYNNFTNNNPGNPRLSP	S	Y	N	N	8	5	3	-0.605253	0.0988784	0.128669	0.295268	-0.0571631	-0.183245	-0.620237	-0.359781	STYX	-0.0279203	0.99748	-0.387755	0.171596	CENTER
BCAS3_565	sp|Q8CCN5|BCAS3_MOUSE	Q8CCN5	565	0.981	FGAGCFSIKAPCKVKSPPQISPSKSMGGEFC	S	P	P	Q	5	3	2	NA	NA	-0.0819514	-0.0341987	0.0572342	NA	0.0788162	0.219549	STYX	-0.0196387	0.499746	0.149182	0.615195	CENTER
BCAS3_570	sp|Q8CCN5|BCAS3_MOUSE	Q8CCN5	570	0.998	FSIKAPCKVKSPPQISPSKSMGGEFCVAAVF	S	P	S	K	7	4	3	0.511802	-0.130186	-0.227649	NA	-0.192226	0.214775	0.161094	-0.0531139	STYX	-0.0095649	0.227722	0.107585	0.649441	CENTER
BCAS3_823	sp|Q8CCN5|BCAS3_MOUSE	Q8CCN5	823	0.996	AVSDRRGVSTVTDAASGTFDRSVTLLEVCGS	S	G	T	F	7	4	3	0.0188334	-0.282456	-0.194039	0.716182	NA	-0.886696	-1.35435	-0.797747	STYX	0.0646301	0.492713	-1.01293	0.00877052	NR
BCAS3_869	sp|Q8CCN5|BCAS3_MOUSE	Q8CCN5	869	0.997	SEEGLRERLADAMAESPSRDVVGSGTELQRE	S	P	S	R	8	5	3	0.0698712	0.208924	0.371346	0.526591	0.163742	-0.28212	-0.4662	0.179522	STYX	0.268095	0.0234322	-0.189599	0.506481	CENTER
BCAS3_886	sp|Q8CCN5|BCAS3_MOUSE	Q8CCN5	886	0.999	SRDVVGSGTELQREGSIETLSNSSGSTSGSI	S	I	E	T	6	3	3	0.16582	0.166137	0.361551	NA	NA	-0.272132	-0.368676	-0.394178	STYX	0.231169	0.0773827	-0.344995	0.198093	CENTER
BCKD_31	sp|O55028|BCKD_MOUSE	O55028	31	0.995	SLWPLLGSSLSLRARSTSATDTHHVELARER	S	T	S	A	8	5	3	-0.26429	0.222111	0.139823	-0.365209	0.486032	-0.816175	-0.602223	-0.299746	STYX	0.0436935	0.941591	-0.572715	0.0621408	CENTER
BCKD_31 32 33	sp|O55028|BCKD_MOUSE	O55028	31 32 33	0.899	SLWPLLGSSLSLRARSTSATDTHHVELARER LWPLLGSSLSLRARSTSATDTHHVELARERS WPLLGSSLSLRARSTSATDTHHVELARERSK	S	T	S	A	8	5	3	-0.343004	0.294259	-0.162476	-0.173456	0.204593	-0.375822	-0.425063	-0.120076	STYX	-0.0360169	0.389769	-0.306987	0.257451	CENTER
BCL6_458	sp|P41183|BCL6_MOUSE	P41183	458	0.998	QASRLNNLVNRSLAGSPRSSSESHSPLYMHP	S	P	R	S	6	4	2	0.228737	0.117695	-0.120895	NA	0.107137	NA	-0.25788	-0.078234	STYX	0.0831686	0.572704	-0.168057	0.610711	CENTER
BCL9_153 154 155	sp|Q9D219|BCL9_MOUSE	Q9D219	153 154 155	0.877	HTPHSMTPSTATAPRSSTPSHGQTPAPEPIS TPHSMTPSTATAPRSSTPSHGQTPAPEPISA PHSMTPSTATAPRSSTPSHGQTPAPEPISAQ	S	S	T	P	5	2	3	-0.48945	0.311076	NA	NA	NA	-0.635843	-0.469131	-0.315039	STYX	-0.0891874	0.781902	-0.473338	0.0981755	CENTER
BCL9_155	sp|Q9D219|BCL9_MOUSE	Q9D219	155	0.967	PHSMTPSTATAPRSSTPSHGQTPAPEPISAQ	T	P	S	H	5	2	3	-0.693576	0.0771277	NA	NA	NA	-0.445671	-0.860621	-0.521869	STYX	-0.308224	0.336612	-0.609387	0.0475073	CENTER
BCL9_291	sp|Q9D219|BCL9_MOUSE	Q9D219	291	0.979	RESPGVENKLIPPVGSPGSSTPLPPDGTGPN	S	P	G	S	8	5	3	-0.372239	0.196625	0.141561	0.459095	-0.197512	-0.189486	-0.176548	-0.0770993	STYX	0.0455063	0.934177	-0.147711	0.580482	CENTER
BCL9_315	sp|Q9D219|BCL9_MOUSE	Q9D219	315	0.998	PDGTGPNSTPNNRAVTPVSQGSNSSSADPKA	T	P	V	S	6	3	3	-0.243038	0.564253	-0.0928955	NA	NA	-0.689278	-0.958493	-0.606994	STYX	0.0761066	0.624911	-0.751588	0.0219626	CENTER
BCL9_686	sp|Q9D219|BCL9_MOUSE	Q9D219	686	0.996	GSNPIFPRIPVEGPLSPSRGDFPKGMPPQIG	S	P	S	R	8	5	3	0.515495	-0.163159	0.00703994	-0.0196784	-0.467653	-0.653309	-0.658655	-0.918272	STYX	-0.0255909	0.37354	-0.743412	0.0221956	CENTER
BCL9L_1007	sp|Q67FY2|BCL9L_MOUSE	Q67FY2	1007	0.999	LKSPSMAVPSPGWVASPKTAMPSPGVSQNKQ	S	P	K	T	5	3	2	NA	0.159612	-0.198328	NA	-0.198912	NA	-0.289946	-0.588205	STYX	-0.0792091	0.260667	-0.439076	0.208648	CENTER
BCL9L_1014	sp|Q67FY2|BCL9L_MOUSE	Q67FY2	1014	0.998	VPSPGWVASPKTAMPSPGVSQNKQPPLSINS	S	P	G	V	5	2	3	-0.343591	0.00355995	NA	NA	NA	-0.824267	-1.01477	-0.436193	STYX	-0.170015	0.200008	-0.758412	0.0246128	CENTER
BCL9L_116	sp|Q67FY2|BCL9L_MOUSE	Q67FY2	116	0.996	VSPFSSLKGKVKRERSVSVDSGEQREAGTPS	S	V	S	V	7	4	3	-0.296976	0.0125364	NA	0.179006	-0.0290812	-0.151364	-1.00245	-0.474775	STYX	-0.0336287	0.526452	-0.542862	0.099432	CENTER
BCL9L_118	sp|Q67FY2|BCL9L_MOUSE	Q67FY2	118	0.997	PFSSLKGKVKRERSVSVDSGEQREAGTPSLD	S	V	D	S	8	5	3	0.0756886	-0.150267	-0.131794	0.338287	0.00373038	-0.233158	-0.715595	-0.729679	STYX	0.0271291	0.684502	-0.559477	0.0690503	CENTER
BCL9L_21	sp|Q67FY2|BCL9L_MOUSE	Q67FY2	21	0.998	NKTRLPHPRRREAPGSPPLSPRGHCPPAPAK	S	P	P	L	8	5	3	0.338751	-0.153373	-0.184816	-0.001896	0.0570272	-0.398201	-0.791694	-0.774352	STYX	0.0111386	0.562961	-0.654749	0.0373886	CENTER
BCL9L_747	sp|Q67FY2|BCL9L_MOUSE	Q67FY2	747	0.999	GTPMGIEFGGGRGLLSPPMGQSGLREVDPPM	S	P	P	M	7	4	3	0.863264	-0.488781	NA	0.181747	-0.390841	-0.480611	-0.63452	-0.316148	STYX	0.0413472	0.709393	-0.477093	0.0960204	CENTER
BCLA3_139	sp|A2AG58|BCLA3_MOUSE	A2AG58	139	0.994	EHERDCYIPTVQGRYTPDDHRGRGRGSGRGE	T	P	D	D	5	2	3	-0.232363	-0.623013	NA	NA	NA	-0.226309	0.239424	-0.337543	STYX	-0.427688	0.0255385	-0.108143	0.691137	CENTER
BCLA3_205	sp|A2AG58|BCLA3_MOUSE	A2AG58	205	0.999	DELRHQRVQEESYPQSPRRGSEDFGTRNPFQ	S	P	R	R	8	5	3	0.123929	-0.136722	-0.131377	-0.152852	0.0728164	-0.314786	-0.397172	-0.88996	STYX	-0.0448412	0.248352	-0.533973	0.0833242	CENTER
BCLA3_409 410	sp|A2AG58|BCLA3_MOUSE	A2AG58	409 410	0.898	EDCRKENASFSKQFDTSPKPEEKCYSLIKKK DCRKENASFSKQFDTSPKPEEKCYSLIKKKP	T	S	P	K	8	5	3	0.00842493	-0.0152243	-0.116299	-0.368775	-0.232337	-0.622389	-0.906158	-1.32074	STYX	-0.144842	0.0366692	-0.949763	0.0122146	NR
BCLA3_530	sp|A2AG58|BCLA3_MOUSE	A2AG58	530	0.995	IKNRQDADFNQTKSNSDPEFHRRIDMSLDDF	S	D	P	E	4	2	2	-0.92423	0.0273432	NA	NA	NA	-0.0172123	NA	-0.292294	STYX	-0.448444	0.217799	-0.154753	0.640638	CENTER
BCLA3_592	sp|A2AG58|BCLA3_MOUSE	A2AG58	592	0.993	KERLQNEDENIFHMASPTERNHQSPSFSKVK	S	P	T	E	8	5	3	0.159539	0.334083	0.0966797	-0.0474593	-0.0142088	-0.534048	-0.690639	-0.313995	STYX	0.105727	0.462633	-0.512894	0.0800203	CENTER
BCLF1_153	sp|Q8K019|BCLF1_MOUSE	Q8K019	153	0.997	SPRSSSSRSSSPYSKSPVSKRRGSQEKQTKK	S	P	V	S	5	3	2	-0.127265	NA	NA	-0.81053	-0.0852323	NA	-0.356766	-0.466523	STYX	-0.341009	0.0315378	-0.411645	0.21927	CENTER
BCLF1_177	sp|Q8K019|BCLF1_MOUSE	Q8K019	177	1	QEKQTKKAEGEPQEESPLKSKSQEEPKDTFE	S	P	L	K	8	5	3	0.311436	0.378678	-0.353262	-0.562215	-0.17878	-0.572268	-0.189486	-0.441679	STYX	-0.0808285	0.383464	-0.401144	0.153158	CENTER
BCLF1_196	sp|Q8K019|BCLF1_MOUSE	Q8K019	196	0.998	SKSQEEPKDTFEHDPSESIDEFNKSATSGDI	S	E	S	I	5	2	3	0.587525	0.511801	NA	NA	NA	-0.370441	-0.541057	0.1928	STYX	0.549663	0.0283874	-0.239566	0.411247	CENTER
BCLF1_198	sp|Q8K019|BCLF1_MOUSE	Q8K019	198	0.999	SQEEPKDTFEHDPSESIDEFNKSATSGDIWP	S	I	D	E	6	3	3	0.0547939	0.148145	NA	0.0899956	NA	-0.396202	-0.419554	-0.764506	STYX	0.0976449	0.42423	-0.526754	0.0746638	CENTER
BCLF1_216	sp|Q8K019|BCLF1_MOUSE	Q8K019	216	0.997	EFNKSATSGDIWPGLSAYDNSPRSPHSPSPI	S	A	Y	D	6	3	3	0.470548	0.128316	0.0986493	NA	NA	-0.122244	-0.192785	0.300848	STYX	0.232504	0.126992	-0.00472677	0.987679	CENTER
BCLF1_221	sp|Q8K019|BCLF1_MOUSE	Q8K019	221	0.998	ATSGDIWPGLSAYDNSPRSPHSPSPIATPPS	S	P	R	S	8	5	3	0.298078	0.0299727	0.38685	-0.114716	-0.272057	0.0272798	-0.0619613	0.15171	STYX	0.0656254	0.970053	0.0390095	0.851459	CENTER
BCLF1_267	sp|Q8K019|BCLF1_MOUSE	Q8K019	267	1	SAKNTPSQHSHSIQHSPERSGSGSVGNGSSR	S	P	E	R	6	3	3	0.148869	-0.872828	NA	NA	0.288511	1.16009	0.962366	0.192255	STYX	-0.145149	0.869948	0.771571	0.0440124	CENTER
BCLF1_283 284 289	sp|Q8K019|BCLF1_MOUSE	Q8K019	283 284 289	0.886	PERSGSGSVGNGSSRYSPSQNSPIHHIPSRR ERSGSGSVGNGSSRYSPSQNSPIHHIPSRRS GSVGNGSSRYSPSQNSPIHHIPSRRSPAKTI	Y	S	P	S	5	2	3	-0.535794	0.440554	NA	NA	NA	-0.35899	0.195989	-0.38335	STYX	-0.0476201	0.876562	-0.182117	0.512317	CENTER
BCLF1_289	sp|Q8K019|BCLF1_MOUSE	Q8K019	289	0.999	GSVGNGSSRYSPSQNSPIHHIPSRRSPAKTI	S	P	I	H	5	2	3	-0.212008	0.244474	NA	NA	NA	0.0751814	-0.12008	-0.105897	STYX	0.0162329	0.839019	-0.050265	0.870263	CENTER
BCLF1_305	sp|Q8K019|BCLF1_MOUSE	Q8K019	305	0.997	PIHHIPSRRSPAKTITPQNAPREESRGRSSF	T	P	Q	N	8	5	3	0.503775	-0.00216803	-0.131479	-0.368576	-0.0923452	0.404363	0.184991	-0.293206	STYX	-0.0181587	0.278944	0.0987161	0.711555	CENTER
BCLF1_314	sp|Q8K019|BCLF1_MOUSE	Q8K019	314	0.999	SPAKTITPQNAPREESRGRSSFYPEGDQETA	S	R	G	R	8	5	3	-0.421068	0.156196	-0.109826	-0.29736	-0.0912642	0.0243593	0.254877	-0.878112	STYX	-0.152664	0.0511846	-0.199625	0.638033	CENTER
BCLF1_318	sp|Q8K019|BCLF1_MOUSE	Q8K019	318	0.993	TITPQNAPREESRGRSSFYPEGDQETAKTGK	S	S	F	Y	8	5	3	0.291463	0.302729	-0.11517	-0.484077	-0.224525	-0.526148	-0.649233	0.109085	STYX	-0.0459163	0.457225	-0.355432	0.245024	CENTER
BCLF1_318 319	sp|Q8K019|BCLF1_MOUSE	Q8K019	318 319	0.887	TITPQNAPREESRGRSSFYPEGDQETAKTGK ITPQNAPREESRGRSSFYPEGDQETAKTGKF	S	S	F	Y	7	5	2	0.435907	-0.0650279	-0.145836	-0.833137	-0.170106	-0.625206	NA	0.268682	STYX	-0.15564	0.117513	-0.178262	0.67355	CENTER
BCLF1_319	sp|Q8K019|BCLF1_MOUSE	Q8K019	319	0.99	ITPQNAPREESRGRSSFYPEGDQETAKTGKF	S	F	Y	P	7	4	3	0.496074	0.114965	NA	-0.467446	-0.186433	-0.295405	-0.436754	0.25903	STYX	-0.0107099	0.645532	-0.15771	0.571086	CENTER
BCLF1_339	sp|Q8K019|BCLF1_MOUSE	Q8K019	339	0.996	GDQETAKTGKFLKRFTDEESRVFLLDRGNIR	T	D	E	E	7	4	3	0.429073	-0.0748089	0.203496	NA	-0.163686	0.122939	0.304154	0.138254	STYX	0.0985186	0.857701	0.188449	0.4501	CENTER
BCLF1_395	sp|Q8K019|BCLF1_MOUSE	Q8K019	395	0.999	DYFSDKESAKQKFHDSEGDDTEETEDYRQFR	S	E	G	D	8	5	3	-0.0864599	-0.225955	0.139681	0.102055	-0.0777816	-0.317657	-0.0837801	-0.0891381	STYX	-0.029692	0.381714	-0.163525	0.547072	CENTER
BCLF1_400	sp|Q8K019|BCLF1_MOUSE	Q8K019	400	0.999	KESAKQKFHDSEGDDTEETEDYRQFRKSVLA	T	E	E	T	4	2	2	0.0678693	0.136322	NA	NA	NA	NA	0.13712	-0.115037	STYX	0.102095	0.486484	0.0110414	0.948228	CENTER
BCLF1_412	sp|Q8K019|BCLF1_MOUSE	Q8K019	412	1	GDDTEETEDYRQFRKSVLADQGKSFATSSHR	S	V	L	A	8	5	3	0.456248	-0.115435	-0.0843363	-0.361516	-0.856145	-0.0736753	-0.0572873	0.197433	STYX	-0.192237	0.0899656	0.0221569	0.90607	CENTER
BCLF1_448	sp|Q8K019|BCLF1_MOUSE	Q8K019	448	1	GPKYKSKVSLKGNRESDGFREEKNYKLKETA	S	D	G	F	8	5	3	0.623878	1.45745	0.15845	-0.59439	-0.633778	-0.10786	0.00313533	0.0140387	STYX	0.202323	0.754975	-0.0302287	0.929415	CENTER
BCLF1_494	sp|Q8K019|BCLF1_MOUSE	Q8K019	494	1	EDKGSDRITVKKEVQSPEQVKSEKLKELFDY	S	P	E	Q	8	5	3	0.298014	0.115498	-0.104261	-0.357418	-0.285923	-0.350899	-0.0276495	-0.38401	STYX	-0.0668182	0.300788	-0.254186	0.346995	CENTER
BCLF1_509 510	sp|Q8K019|BCLF1_MOUSE	Q8K019	509 510	0.899	SPEQVKSEKLKELFDYSPPLHKSLDAREKSI PEQVKSEKLKELFDYSPPLHKSLDAREKSIF	Y	S	P	P	8	5	3	0.514456	-0.0502819	-0.0437801	-0.385135	-0.251534	-0.15123	-0.147063	-0.287639	STYX	-0.0432549	0.209433	-0.195311	0.461734	CENTER
BCLF1_510	sp|Q8K019|BCLF1_MOUSE	Q8K019	510	0.996	PEQVKSEKLKELFDYSPPLHKSLDAREKSIF	S	P	P	L	7	4	3	0.652698	-0.0530131	NA	-0.59549	-0.319193	-0.0454498	-0.228388	-0.427417	STYX	-0.0787495	0.242979	-0.233752	0.390411	CENTER
BCLF1_529	sp|Q8K019|BCLF1_MOUSE	Q8K019	529	1	HKSLDAREKSIFREESPLRIKMIASDSHRPE	S	P	L	R	8	5	3	0.362805	0.0163263	-0.164478	-0.166304	-0.116707	-0.268917	-0.386538	-0.410274	STYX	-0.0136714	0.290412	-0.355243	0.188078	CENTER
BCLF1_646	sp|Q8K019|BCLF1_MOUSE	Q8K019	646	1	TSYQKATEEHSTRQKSPEIHRRIDISPSALR	S	P	E	I	8	5	3	-0.48412	-0.0566041	0.783503	0.112229	0.454387	0.552513	0.316834	-0.375911	STYX	0.161879	0.554117	0.164479	0.590134	CENTER
BCLF1_656	sp|Q8K019|BCLF1_MOUSE	Q8K019	656	0.997	STRQKSPEIHRRIDISPSALRKHTRLAGEER	S	P	S	A	8	5	3	0.362437	-0.114169	-0.130808	-0.0936756	-0.0757526	-0.182397	-0.172106	-0.196896	STYX	-0.0103934	0.247208	-0.1838	0.48667	CENTER
BCLF1_688	sp|Q8K019|BCLF1_MOUSE	Q8K019	688	1	FKEEIQKGDKKLRCDSADLRHDIDRRRKERS	S	A	D	L	8	5	3	0.13362	0.418247	-0.221435	0.150227	0.0314933	-0.0127991	0.241564	0.172086	STYX	0.102431	0.510415	0.133617	0.584518	CENTER
BCLF1_759	sp|Q8K019|BCLF1_MOUSE	Q8K019	759	0.991	ERDHSRSSSSSASPSSPSSREEKESKKEREE	S	P	S	S	4	2	2	-0.443306	NA	-0.177152	NA	NA	0.267631	-0.332979	NA	STYX	-0.310229	0.0353115	-0.032674	0.93116	CENTER
BCOR_423	sp|Q8CGN4|BCOR_MOUSE	Q8CGN4	423	1	GHTRKTTVQDRKDGGSPPLLEKQTVTKDVTD	S	P	P	L	6	3	3	0.375511	-0.0258743	NA	-0.024738	NA	-0.535305	-0.584613	-0.843565	STYX	0.1083	0.771347	-0.654494	0.0352424	CENTER
BCORL_1474	sp|A2AQH4|BCORL_MOUSE	A2AQH4	1474	0.997	TPSKYRSAGPEEASESPTARQIPPEARRLIV	S	P	T	A	7	4	3	-0.0327168	0.281431	0.0114671	NA	0.389096	-0.0551981	-0.314908	-0.730911	STYX	0.162319	0.322878	-0.367006	0.220639	CENTER
BCR_356	sp|Q6PAJ1|BCR_MOUSE	Q6PAJ1	356	0.99	TSSEEDFSSGQSSRVSPSPTTYRMFRDKSRS	S	P	S	P	5	2	3	NA	-0.40225	-0.110468	NA	NA	-0.565179	-0.736627	-0.0121888	STYX	-0.256359	0.0585294	-0.437998	0.154896	CENTER
BCR_697	sp|Q6PAJ1|BCR_MOUSE	Q6PAJ1	697	0.994	NFLSSINEEITPRRQSMTVKKGEHRQLLKDS	S	M	T	V	8	5	3	0.0602774	-0.647401	0.932508	0.802388	0.449541	0.0505409	-1.2267	-0.512602	STYX	0.319463	0.138056	-0.562922	0.142274	CENTER
BD1L1_1071	sp|E9Q6J5|BD1L1_MOUSE	E9Q6J5	1071	0.996	TEKKLSRRLCENRRGSTSQEMAKEDKLVANM	S	T	S	Q	5	2	3	-0.42556	0.65297	NA	NA	NA	-0.37089	-0.337742	-0.333546	STYX	0.113705	0.969889	-0.347393	0.192604	CENTER
BD1L1_1071 1072 1073	sp|E9Q6J5|BD1L1_MOUSE	E9Q6J5	1071 1072 1073	0.896	TEKKLSRRLCENRRGSTSQEMAKEDKLVANM EKKLSRRLCENRRGSTSQEMAKEDKLVANMS KKLSRRLCENRRGSTSQEMAKEDKLVANMSG	S	T	S	Q	6	3	3	-0.568215	0.609495	0.129767	NA	NA	-0.357357	-0.171054	-0.5711	STYX	0.0570158	0.748743	-0.366504	0.190015	CENTER
BD1L1_1470	sp|E9Q6J5|BD1L1_MOUSE	E9Q6J5	1470	1	RKTENSEVDTSARRDSAPVPQQRHGKMERGA	S	A	P	V	4	2	2	NA	0.238855	-0.134123	NA	NA	-1.40415	-0.281853	NA	STYX	0.052366	0.979945	-0.843001	0.103653	NR
BD1L1_1678 1679	sp|E9Q6J5|BD1L1_MOUSE	E9Q6J5	1678 1679	0.866	GAVTSAGTEIRAGSLSSEDVDGSQENRIQVG AVTSAGTEIRAGSLSSEDVDGSQENRIQVGP	S	S	E	D	6	3	3	-0.0786651	0.520437	NA	NA	0.0654436	-0.29516	-0.376522	-0.39843	STYX	0.169072	0.580848	-0.356704	0.184249	CENTER
BD1L1_1685	sp|E9Q6J5|BD1L1_MOUSE	E9Q6J5	1685	0.998	TEIRAGSLSSEDVDGSQENRIQVGPKKETEG	S	Q	E	N	5	3	2	1.16462	1.4649	1.04049	NA	NA	NA	0.214635	-0.105043	STYQ	1.22333	0.00346768	0.0547962	0.842476	NR
BD1L1_1794	sp|E9Q6J5|BD1L1_MOUSE	E9Q6J5	1794	0.996	NCTGSEDNREGCAISSETEESAESAMDSTEA	S	E	T	E	4	2	2	0.393188	0.0606409	NA	NA	NA	NA	-0.112318	-0.154787	STYX	0.226915	0.244711	-0.133552	0.685909	CENTER
BD1L1_2001	sp|E9Q6J5|BD1L1_MOUSE	E9Q6J5	2001	1	VLVSGEVPECEVGHMSPRKNEECDGLMASTA	S	P	R	K	8	5	3	0.302884	0.111478	0.108953	0.00889853	-0.166461	-0.107578	-0.220867	-0.0912125	STYX	0.0731504	0.680626	-0.139886	0.60377	CENTER
BD1L1_240	sp|E9Q6J5|BD1L1_MOUSE	E9Q6J5	240	0.997	AKVSERTSRKLSSQPSTDVSTDKERGSEDAT	S	T	D	V	7	4	3	-0.157612	-0.0359422	-0.0462328	-0.06908	NA	-0.241236	-0.794025	-0.840142	STYX	-0.0772166	0.114076	-0.625134	0.0532759	CENTER
BD1L1_2554	sp|E9Q6J5|BD1L1_MOUSE	E9Q6J5	2554	0.999	LPTKSDHSGTWTSEGSPEKMGHVAGARQSFH	S	P	E	K	4	2	2	0.602601	0.213374	NA	NA	NA	NA	-0.187482	0.338859	STYX	0.407988	0.064889	0.0756885	0.821907	CENTER
BD1L1_2841	sp|E9Q6J5|BD1L1_MOUSE	E9Q6J5	2841	0.997	EDSKTETDITTVEQSSPSGKLKVSQADESNK	S	P	S	G	6	3	3	0.481843	-0.0972516	0.257974	NA	NA	0.441346	0.630225	0.0377551	STYX	0.214189	0.322809	0.369775	0.212339	CENTER
BD1L1_2888	sp|E9Q6J5|BD1L1_MOUSE	E9Q6J5	2888	0.997	EKTASMRLRGRKPKRSLTSSDDAESSEPERK	S	L	T	S	6	3	3	-0.0674503	0.467655	0.0315572	NA	NA	-0.343041	0.340666	-0.166151	STYX	0.143921	0.669675	-0.0561756	0.831591	CENTER
BD1L1_2890	sp|E9Q6J5|BD1L1_MOUSE	E9Q6J5	2890	0.992	TASMRLRGRKPKRSLTSSDDAESSEPERKRQ	T	S	S	D	4	2	2	0.326142	0.562435	NA	NA	NA	0.278867	NA	-0.539252	STYX	0.444288	0.0427147	-0.130192	0.745314	CENTER
BD1L1_2898	sp|E9Q6J5|BD1L1_MOUSE	E9Q6J5	2898	0.993	RKPKRSLTSSDDAESSEPERKRQKSVSETSE	S	E	P	E	7	4	3	-0.0285871	0.179726	-0.115955	NA	0.534551	0.0596784	-0.435988	-0.674023	STYX	0.142434	0.647612	-0.350111	0.244915	CENTER
BD1L1_2968	sp|E9Q6J5|BD1L1_MOUSE	E9Q6J5	2968	0.996	PSTRATSKLGIPETISPRNRQKLAKEKLSTS	S	P	R	N	6	4	2	1.37796	-0.658452	NA	-0.208685	-0.443474	0.517444	NA	0.341435	STYX	0.0168376	0.123459	0.429439	0.218411	CENTER
BD1L1_2989	sp|E9Q6J5|BD1L1_MOUSE	E9Q6J5	2989	0.993	KLAKEKLSTSEKVSKSPPLGRSKAQLSPSVK	S	P	P	L	8	5	3	0.403446	-0.167984	-0.340347	-0.120065	-0.444766	-0.434032	-0.667227	-0.812518	STYX	-0.133943	0.0601754	-0.637926	0.039274	CENTER
BD1L1_3000	sp|E9Q6J5|BD1L1_MOUSE	E9Q6J5	3000	0.996	KVSKSPPLGRSKAQLSPSVKRKREVSPPGAR	S	P	S	V	8	5	3	0.725711	-0.353782	-0.366675	-0.168474	-0.0266629	-0.185076	-0.124131	-0.647989	STYX	-0.0379766	0.134974	-0.319065	0.273517	CENTER
BD1L1_3010	sp|E9Q6J5|BD1L1_MOUSE	E9Q6J5	3010	1	SKAQLSPSVKRKREVSPPGARTRGQQKVDEN	S	P	P	G	8	5	3	0.00277189	-0.390826	-0.248078	-0.07244	-0.082319	-0.262963	-0.258737	-0.449919	STYX	-0.158178	0.0252725	-0.323873	0.230727	CENTER
BD1L1_480	sp|E9Q6J5|BD1L1_MOUSE	E9Q6J5	480	0.976	RHAYVHKPYLYSKYYSDSDDELTVEQRRQSI	S	D	S	D	4	2	2	1.10107	-0.127022	NA	NA	NA	NA	-0.171043	-0.105137	STYX	0.487023	0.69061	-0.13809	0.675823	CENTER
BD1L1_655 656 657	sp|E9Q6J5|BD1L1_MOUSE	E9Q6J5	655 656 657	0.876	ENKTESKVEREYKRRTSTPVILEGAQEETDT NKTESKVEREYKRRTSTPVILEGAQEETDTR KTESKVEREYKRRTSTPVILEGAQEETDTRD	T	S	T	P	6	4	2	NA	0.63734	0.061089	0.0620374	-0.133009	0.295875	NA	-0.205287	STYX	0.156864	0.641797	0.0452941	0.890652	CENTER
BEST1_509	sp|O88870|BEST1_MOUSE	O88870	509	0.998	HMKKKTVEFNLNIPESPTEHLQQRRLDQMST	S	P	T	E	7	4	3	0.186847	NA	0.185955	0.100413	-0.143169	-0.0222929	0.312425	0.217171	STYX	0.0825115	0.561177	0.169101	0.507166	CENTER
BI2L1_261	sp|Q9DBJ3|BI2L1_MOUSE	Q9DBJ3	261	0.999	IKTPISTPVSGTPQPSPMIERSKMIGKDYDT	S	P	M	I	6	3	3	-0.251398	0.191007	0.211583	NA	NA	-0.235984	-0.664758	-0.315753	STYX	0.0503972	0.779746	-0.405498	0.157433	CENTER
BI2L1_281	sp|Q9DBJ3|BI2L1_MOUSE	Q9DBJ3	281	0.997	RSKMIGKDYDTLSKYSPKMPPAPSVKAYTSP	S	P	K	M	8	5	3	-0.216672	0.0371739	0.0753613	-0.180407	-0.0616485	-0.961071	-0.988704	-1.26206	STYX	-0.0692385	0.168282	-1.07061	0.00655299	NR
BI2L1_413	sp|Q9DBJ3|BI2L1_MOUSE	Q9DBJ3	413	0.997	TKLLEENEAMSVPTPSPAPVRSISTVDLTEK	S	P	A	P	8	5	3	0.728999	-0.0274002	0.0941915	0.290137	-0.158071	-0.112141	-0.429542	0.0734626	STYX	0.185571	0.470048	-0.156073	0.583875	CENTER
BI2L1_421	sp|Q9DBJ3|BI2L1_MOUSE	Q9DBJ3	421	0.988	AMSVPTPSPAPVRSISTVDLTEKSSVVIPPP	S	T	V	D	6	4	2	0.0394486	-0.173768	NA	0.446242	-0.436668	NA	-1.27101	-1.28527	STYX	-0.0311863	0.479736	-1.27814	0.019035	NR
BI2L1_421 422	sp|Q9DBJ3|BI2L1_MOUSE	Q9DBJ3	421 422	0.89	AMSVPTPSPAPVRSISTVDLTEKSSVVIPPP MSVPTPSPAPVRSISTVDLTEKSSVVIPPPD	S	T	V	D	8	5	3	0.145122	-0.316597	-0.21072	0.245727	-0.359851	-1.09101	-1.70133	-1.21677	STYX	-0.0992637	0.222693	-1.33637	0.00426766	NR
BICC1_768	sp|Q99MQ1|BICC1_MOUSE	Q99MQ1	768	0.998	VRTPTNTWSGLGFSKSMPAETIKELRRANHV	S	M	P	A	5	3	2	0.290593	-0.346329	NA	NA	-0.369722	-0.615876	NA	-0.304743	STYX	-0.141819	0.252872	-0.460309	0.191242	CENTER
BICD2_578	sp|Q921C5|BICD2_MOUSE	Q921C5	578	1	QGKAGRTSPEGRGRRSPVLLPKGLLATEVGR	S	P	V	L	8	5	3	0.296893	-0.0370289	-0.187172	0.0570089	-0.132546	-0.640806	-0.889308	-0.634727	STYX	-0.000568868	0.484878	-0.721614	0.0244511	CENTER
BICD2_819	sp|Q921C5|BICD2_MOUSE	Q921C5	819	0.996	RGRSKAASKAKPASPSL______________	S	L	_	_	6	4	2	NA	-0.099757	-0.265954	0.264628	-0.0227188	-0.830959	NA	-1.03544	STYX	-0.0309504	0.388814	-0.933202	0.0344786	NR
BICRA_1427	sp|F8VPZ9|BICRA_MOUSE	F8VPZ9	1427	0.996	PGAAEGAQGRPRGAGSPTPLPTKVDEATSGL	S	P	T	P	8	5	3	0.0230458	0.0253706	-0.410032	-0.20066	-0.114066	-0.880038	-0.882834	-1.2019	STYX	-0.135268	0.0613431	-0.988258	0.00833342	NR
BICRL_673	sp|Q8CHH5|BICRL_MOUSE	Q8CHH5	673	0.993	TLGATQAQPESSVGSSPSQTAVQVDSHPGQK	S	P	S	Q	4	2	2	-0.394818	0.0649116	NA	NA	NA	NA	-0.53033	-0.479016	STYX	-0.164953	0.33145	-0.504673	0.14755	CENTER
BICRL_930	sp|Q8CHH5|BICRL_MOUSE	Q8CHH5	930	1	EDKGGRRDPAKVSRCSPGPEGHRKSLPRPDH	S	P	G	P	6	4	2	-1.90037	0.62885	1.41422	NA	0.291977	NA	1.26347	0.360844	STYX	0.108668	0.160935	0.812159	0.093315	CENTER
BIEA_229	sp|Q9CY64|BIEA_MOUSE	Q9CY64	229	1	WIEEKGPGLKRNRHISIHFKSGSLEEVPNVG	S	I	H	F	7	4	3	0.379076	NA	0.0470975	0.161533	-0.0432747	-0.722236	-0.789304	-0.759522	STYX	0.136108	0.376883	-0.75702	0.0189913	CENTER
BIEA_236	sp|Q9CY64|BIEA_MOUSE	Q9CY64	236	0.996	GLKRNRHISIHFKSGSLEEVPNVGVNKNIFL	S	L	E	E	7	4	3	0.23094	0.182216	-0.0716151	NA	-0.113649	-1.02111	-1.02271	-1.32842	STYX	0.056973	0.939038	-1.12408	0.00573661	NR
BIG1_1076	sp|G3X9K3|BIG1_MOUSE	G3X9K3	1076	0.997	VKPRYISGTVRGREGSLTGTKDQAPDEFVGL	S	L	T	G	5	2	3	NA	-0.0340711	0.414297	NA	NA	-1.50817	-2.40798	-1.23221	STYX	0.190113	0.511432	-1.71612	0.00337502	NR
BIG1_394	sp|G3X9K3|BIG1_MOUSE	G3X9K3	394	0.993	VAYTPSLPDDRLSVSSNDTQESGNSSGPSPG	S	N	D	T	4	2	2	-0.464438	0.204038	NA	NA	NA	0.0546183	0.202776	NA	STYX	-0.1302	0.633857	0.128697	0.659025	CENTER
BIG2_1022	sp|A2A5R2|BIG2_MOUSE	A2A5R2	1022	0.978	ELAQLIGTGVKTRYLSGSGREREGSLKGHSL	S	G	S	G	5	3	2	0.210621	-0.845415	NA	0.240147	NA	0.0549766	NA	-0.0205806	STYX	-0.131549	0.808305	0.017198	0.933894	CENTER
BIG2_1518	sp|A2A5R2|BIG2_MOUSE	A2A5R2	1518	0.997	EEVSDRHLDVDLDRQSLSSIDRNASERGQSQ	S	L	S	S	7	4	3	0.0451617	0.0702797	0.281151	-0.0434176	NA	0.203798	-0.104325	0.072515	STYX	0.0882936	0.595689	0.0573292	0.79394	CENTER
BIG2_227	sp|A2A5R2|BIG2_MOUSE	A2A5R2	227	0.999	MQSKPQSPVIQATAGSPKFSRLKQSQAQSKP	S	P	K	F	8	5	3	-0.103442	0.27479	-0.100681	-0.117818	-0.141633	-0.028296	0.000201978	-0.342225	STYX	-0.0377569	0.175364	-0.12344	0.655514	CENTER
BIG2_276	sp|A2A5R2|BIG2_MOUSE	A2A5R2	276	0.998	GKVSLENGEAPRERGSPVSGRAEPSRGTDSG	S	P	V	S	8	5	3	-1.10099	0.676211	-0.127889	0.052714	0.221296	1.74248	1.6922	0.351104	STYX	-0.0557311	0.999959	1.26193	0.0169117	NR
BIG2_355	sp|A2A5R2|BIG2_MOUSE	A2A5R2	355	0.986	ENSQTNGIADDRQSLSSADNLEPDVQGHQVA	S	S	A	D	4	2	2	-0.0709746	0.0766257	NA	NA	NA	0.505825	NA	-0.646877	STYX	0.00282556	0.751892	-0.0705261	0.868564	CENTER
BIG2_355 356	sp|A2A5R2|BIG2_MOUSE	A2A5R2	355 356	0.876	ENSQTNGIADDRQSLSSADNLEPDVQGHQVA NSQTNGIADDRQSLSSADNLEPDVQGHQVAA	S	S	A	D	6	3	3	-0.113715	-0.105824	0.0963569	NA	NA	0.0647914	0.0268785	0.162616	STYX	-0.0410609	0.357306	0.0847621	0.709265	CENTER
BIG2_621	sp|A2A5R2|BIG2_MOUSE	A2A5R2	621	0.995	QEMGDGKGLDMARRCSVTSVESTVSSGTQTA	S	V	T	S	6	3	3	0.155293	0.260484	NA	NA	-0.38043	-0.365088	-0.707844	-0.305438	STYX	0.0117822	0.844232	-0.459457	0.111748	CENTER
BIN1_298	sp|O08539|BIN1_MOUSE	O08539	298	0.996	AQPSDNAPEKGNKSPSPPPDGSPAATPEIRV	S	P	P	P	8	5	3	0.125289	0.190817	-0.16942	0.0599119	-0.0953185	-0.217732	-0.586522	-0.607203	STYX	0.0222559	0.851106	-0.470486	0.106168	CENTER
BIN1_304	sp|O08539|BIN1_MOUSE	O08539	304	0.998	APEKGNKSPSPPPDGSPAATPEIRVNHEPEP	S	P	A	A	8	5	3	0.123174	0.0928279	-0.121558	0.304902	-0.238595	-0.318427	-0.588324	-0.511424	STYX	0.0321501	0.927015	-0.472725	0.0966629	CENTER
BIN1_324	sp|O08539|BIN1_MOUSE	O08539	324	0.998	PEIRVNHEPEPASGASPGATIPKSPSQLRKG	S	P	G	A	7	4	3	-0.0098031	0.0100328	-0.118121	0.684837	NA	-0.318416	0.0594321	-1.08797	STYX	0.141737	0.972613	-0.448983	0.219533	CENTER
BIN1_332	sp|O08539|BIN1_MOUSE	O08539	332	0.996	PEPASGASPGATIPKSPSQLRKGPPVPPPPK	S	P	S	Q	4	2	2	NA	0.40468	NA	NA	0.126908	NA	-0.545517	-0.442717	STYX	0.265794	0.141113	-0.494117	0.15383	CENTER
BIN2_380	sp|D3Z6Q9|BIN2_MOUSE	D3Z6Q9	380	0.998	SAQSPGRGQTGKDTPSPGDVVLRARASSEGA	S	P	G	D	7	4	3	0.435302	-0.0969574	-0.0179114	NA	0.283366	0.735573	-0.137509	0.897934	STYX	0.15095	0.499896	0.498666	0.166376	CENTER
BIN2_422	sp|D3Z6Q9|BIN2_MOUSE	D3Z6Q9	422	0.866	TSAPPSRPPPPRASGSGSCNAPGSPEGSSQL	S	G	S	C	4	2	2	-0.953317	NA	NA	NA	0.438886	0.0548637	0.628042	NA	STYX	-0.257216	0.858393	0.341453	0.356492	CENTER
BIN2_430	sp|D3Z6Q9|BIN2_MOUSE	D3Z6Q9	430	0.999	PPPRASGSGSCNAPGSPEGSSQLCSPRASPD	S	P	E	G	8	5	3	-0.577846	0.147023	-0.166005	-0.0289906	-0.0206012	0.249196	0.879934	-0.940747	STYX	-0.129284	0.166244	0.0627943	0.788686	CENTER
BIN2_443	sp|D3Z6Q9|BIN2_MOUSE	D3Z6Q9	443	0.998	PGSPEGSSQLCSPRASPDASSNPEPAETREK	S	P	D	A	8	5	3	-0.20186	0.138087	0.0257038	-0.168243	-0.154892	0.640893	0.548271	0.407867	STYX	-0.0722407	0.146905	0.532344	0.0770692	CENTER
BIN3_248	sp|Q9JI08|BIN3_MOUSE	Q9JI08	248	1	RERENETKLSELRALSIVADD__________	S	I	V	A	6	4	2	1.28129	-0.568763	NA	0.0131528	-0.830708	NA	0.148221	0.639785	STYX	-0.0262569	0.352806	0.394003	0.279369	CENTER
BIP_649 650	sp|P20029|BIP_MOUSE	P20029	649 650	0.879	KLYGSGGPPPTGEEDTSEKDEL_________ LYGSGGPPPTGEEDTSEKDEL__________	T	S	E	K	6	4	2	NA	0.0115499	0.139281	0.0308754	-0.147353	NA	-0.22019	-0.107817	STYX	0.00858823	0.747487	-0.164004	0.614389	CENTER
BIRC2_139	sp|Q62210|BIRC2_MOUSE	Q62210	139	0.987	PSKNMSPVKSRFAHSSPLERGGIHSNLCSSP	S	P	L	E	8	5	3	1.48919	-0.438414	0.212618	0.571762	-0.306738	0.126559	0.504964	0.592085	STYX	0.305684	0.631255	0.407869	0.163771	CENTER
BIRC2_152 153	sp|Q62210|BIRC2_MOUSE	Q62210	152 153	0.894	HSSPLERGGIHSNLCSSPLNSRAVEDFSSRM SSPLERGGIHSNLCSSPLNSRAVEDFSSRMD	S	S	P	L	7	4	3	0.0802228	-0.059452	-0.0281099	0.0461313	NA	-0.0361481	-0.506773	-0.19884	STYX	0.00969803	0.73393	-0.247254	0.376114	CENTER
BIRC6_2244 2245	sp|O88738|BIRC6_MOUSE	O88738	2244 2245	0.896	NNLHTQNLNRSSKGGSSLDRLYSRKIRKQLV NLHTQNLNRSSKGGSSLDRLYSRKIRKQLVH	S	S	L	D	5	3	2	-0.969413	NA	-0.413536	NA	0.0870709	0.00728394	NA	-0.377867	STYX	-0.431959	0.0881494	-0.185292	0.582545	CENTER
BIRC6_483	sp|O88738|BIRC6_MOUSE	O88738	483	0.999	DIPKLEGDSDDLLEDSDSEEHSRSDSVTGHT	S	D	S	E	4	2	2	0.288627	-0.326329	NA	NA	NA	NA	-0.457164	-0.422968	STYX	-0.018851	0.807415	-0.440066	0.192413	CENTER
BIRC6_593	sp|O88738|BIRC6_MOUSE	O88738	593	0.984	YKSPATSPISSNSHRSLDGLSRTQGESISEQ	S	L	D	G	5	3	2	0.153081	-0.630212	NA	NA	-0.826777	NA	-0.0664283	0.254796	STYX	-0.434636	0.127793	0.0941837	0.755998	CENTER
BIRC6_623	sp|O88738|BIRC6_MOUSE	O88738	623	0.999	QGSTDNESCTNSELNSPLVRRTLPVLLLYSI	S	P	L	V	4	2	2	-1.04547	NA	NA	NA	0.284663	0.777211	-0.0393691	NA	STYX	-0.380402	0.729257	0.368921	0.38118	CENTER
BL1S3_61	sp|Q5U5M8|BL1S3_MOUSE	Q5U5M8	61	0.998	RPTGLRVAGEAAETDSEPEPEPTVVPVDLPP	S	E	P	E	4	2	2	0.542551	0.293941	NA	NA	NA	NA	0.0628781	0.496451	STYX	0.418246	0.0479085	0.279665	0.417156	CENTER
BL1S4_164	sp|Q8VED2|BL1S4_MOUSE	Q8VED2	164	1	ARMEEQVAKAEAELGTFPRAFRRLLHTISVP	T	F	P	R	5	2	3	1.37462	-0.425595	NA	NA	NA	-0.165587	-0.189377	-0.0205699	STYX	0.474512	0.976027	-0.125178	0.641284	CENTER
BLM_467	sp|O88700|BLM_MOUSE	O88700	467	0.994	GHPNKELNSPYLLSHSPSTEECLPTTTPGKT	S	P	S	T	4	2	2	1.46292	-0.350169	NA	NA	NA	NA	0.334884	0.906719	STYX	0.556377	0.947185	0.620801	0.128848	CENTER
BLNK_129	sp|Q9QUN3|BLNK_MOUSE	Q9QUN3	129	0.998	FTRGEYVDNRSSQRHSPPFSKTLPSKPSWPS	S	P	P	F	4	2	2	-0.278265	0.000518699	NA	NA	NA	-0.409424	NA	-0.00528332	STYX	-0.138873	0.213068	-0.207354	0.542012	CENTER
BLNK_196	sp|Q9QUN3|BLNK_MOUSE	Q9QUN3	196	0.987	PVEDNDENYIHPRESSPPPAEKAPMVNRSTK	S	P	P	P	5	2	3	-0.377137	0.703046	NA	NA	NA	0.45425	0.56308	0.842224	STYX	0.162954	0.997975	0.619851	0.0524246	CENTER
BMP2K_1010	sp|Q91Z96|BMP2K_MOUSE	Q91Z96	1010	0.991	TPERARRHKKVGRRDSQSSNEFLTISDSKEN	S	Q	S	S	5	2	3	0.257335	0.18432	NA	NA	NA	-0.167184	-0.747331	-0.310212	STYQ	0.220827	0.140142	-0.408243	0.169261	CENTER
BMP2K_13	sp|Q91Z96|BMP2K_MOUSE	Q91Z96	13	0.995	___MKKFSRMPKSEGSGGGAAAGGAAGGGLG	S	G	G	G	5	2	3	-0.292501	NA	-0.0160119	NA	NA	0.28385	-0.80679	0.227676	STYX	-0.154256	0.176811	-0.0984216	0.885234	CENTER
BMP2K_644	sp|Q91Z96|BMP2K_MOUSE	Q91Z96	644	0.995	DREFDLLRSNRLGASTPSDKTVDLPPAPHSR	T	P	S	D	5	2	3	0.0126341	0.0358183	NA	NA	NA	-1.08856	-0.488847	-0.891951	STYX	0.0242262	0.948098	-0.82312	0.018842	CENTER
BMP2K_702	sp|Q91Z96|BMP2K_MOUSE	Q91Z96	702	0.987	NQKSITANLTKNGGSSPLCKDQRAGKKTSEN	S	P	L	C	5	2	3	NA	0.030886	0.0171711	NA	NA	-0.600626	-0.401184	-0.0729995	STYX	0.0240285	0.94536	-0.35827	0.212192	CENTER
BMP2K_715	sp|Q91Z96|BMP2K_MOUSE	Q91Z96	715	0.989	GSSPLCKDQRAGKKTSENPVIRGQVQKGHDD	S	E	N	P	6	4	2	0.136605	-0.248824	-0.152803	0.267136	NA	-0.0654879	NA	-1.36897	STYX	0.000528275	0.680819	-0.71723	0.200353	CENTER
BMP2K_995	sp|Q91Z96|BMP2K_MOUSE	Q91Z96	995	0.998	GTPTSAKKTLKPPYRTPERARRHKKVGRRDS	T	P	E	R	7	4	3	-0.378199	-0.0835941	0.236812	NA	-0.0402745	-0.798974	-1.00328	-1.23157	STYX	-0.0663141	0.32875	-1.01127	0.00810942	NR
BMPR2_863	sp|O35607|BMPR2_MOUSE	O35607	863	0.983	QNQFIGEDTRLNINSSPDEHEPLLRREQQAG	S	P	D	E	4	2	2	0.523735	0.122072	NA	NA	NA	-0.537265	NA	-0.797689	STYX	0.322904	0.126392	-0.667477	0.0811024	CENTER
BNC1_306	sp|O35914|BNC1_MOUSE	O35914	306	0.998	SSSYSIASKLERTQLSPEAKVKPERNSLSAK	S	P	E	A	6	4	2	0.208497	NA	0.0523289	0.228364	0.0946768	-0.38795	NA	-0.850824	STYX	0.145967	0.172655	-0.619387	0.108791	CENTER
BNC2_431	sp|Q8BMQ3|BNC2_MOUSE	Q8BMQ3	431	0.999	TSITNVEPKTEPACVSPIQNSAPVSDLSKTE	S	P	I	Q	8	5	3	0.0801151	0.247833	0.109279	0.0444953	-0.243537	-0.583012	-0.711241	-1.10883	STYX	0.0476371	0.755762	-0.801028	0.0195013	CENTER
BNI3L_165	sp|Q9Z2F7|BNI3L_MOUSE	Q9Z2F7	165	0.992	IPPKEFHFRHPKRAASLSMRKSGAMKKGGIF	S	L	S	M	8	5	3	1.21795	-0.209196	0.186033	0.573046	-0.469228	-0.579687	-0.66997	-0.543483	STYX	0.259722	0.62303	-0.597713	0.0450188	CENTER
BNI3L_167	sp|Q9Z2F7|BNI3L_MOUSE	Q9Z2F7	167	0.997	PKEFHFRHPKRAASLSMRKSGAMKKGGIFSA	S	M	R	K	7	4	3	NA	-0.485848	0.121153	0.550009	-0.484682	-0.753781	-1.27276	-0.536895	STYX	-0.0748422	0.555572	-0.854478	0.0184067	NR
BNIP2_114	sp|O54940|BNIP2_MOUSE	O54940	114	0.998	DDLPKPKTTEVIRKGSITEYTATEEKGDGRR	S	I	T	E	8	5	3	0.142172	-0.0657415	0.10717	0.106553	0.0312517	-0.853801	-1.06204	-0.904383	STYX	0.0642812	0.637306	-0.940076	0.00932565	NR
BNIP3_66	sp|O55003|BNIP3_MOUSE	O55003	66	0.993	SSSKSSHCDSPPRSQTPQDTNRAEIDSHSFG	T	P	Q	D	5	2	3	-0.673971	0.123447	NA	NA	NA	-0.0712875	0.312011	-0.0191486	STYX	-0.275262	0.446799	0.0738584	0.769813	CENTER
BNIP3_88	sp|O55003|BNIP3_MOUSE	O55003	88	0.998	AEIDSHSFGEKNSTLSEEDYIERRREVESIL	S	E	E	D	6	3	3	0.168021	-0.0836633	0.2898	NA	NA	-1.00751	-1.00573	-1.00389	STYX	0.124719	0.480993	-1.00571	0.00735992	NR
BOLA1_123	sp|Q9D8S9|BOLA1_MOUSE	Q9D8S9	123	0.999	AKTPAQWRENPQLDISPPCLGGSKKTRGTS_	S	P	P	C	7	5	2	-0.0597461	0.120946	-0.100771	-0.119007	-0.37261	NA	-0.209684	-0.346691	STYX	-0.106238	0.0910899	-0.278188	0.39042	CENTER
BOLA1_23	sp|Q9D8S9|BOLA1_MOUSE	Q9D8S9	23	0.997	QCMVSMATRSCVSRGSAGSAAAGPVEAAIRA	S	A	G	S	7	4	3	NA	0.23691	0.126203	0.0696053	0.135336	-0.357891	-0.795366	-0.561636	STYX	0.142014	0.170153	-0.571631	0.0584334	CENTER
BOLA1_81	sp|Q9D8S9|BOLA1_MOUSE	Q9D8S9	81	1	THFRVAVVSSRFEGMSPLQRHRLVHEALSEE	S	P	L	Q	8	5	3	0.370493	-0.636201	-0.0842444	0.0790655	-0.298757	-0.0187527	0.306479	0.152931	STYX	-0.113929	0.2838	0.146886	0.558522	CENTER
BORA_231	sp|Q8BS90|BORA_MOUSE	Q8BS90	231	0.995	PPCSARGSLEGQFSSSPIQNSVKKYSLGSVT	S	P	I	Q	6	4	2	NA	-0.285994	0.336227	-0.0540369	0.0883494	-0.265168	-0.274481	NA	STYX	0.0211363	0.817178	-0.269824	0.406427	CENTER
BORC5_75	sp|Q9D920|BORC5_MOUSE	Q9D920	75	0.99	PTFQPLLKGLLSGQTSPTNAKLEKLDSQQVL	S	P	T	N	5	2	3	0.288532	-0.116381	NA	NA	NA	0.138325	-0.220873	-0.275191	STYX	0.0860755	0.902053	-0.119246	0.665006	CENTER
BORC6_130	sp|Q9D6W8|BORC6_MOUSE	Q9D6W8	130	1	PSEDQPSALRVCRRGSPGGVEMNVELPQQEG	S	P	G	G	4	2	2	-0.925368	NA	NA	0.797625	NA	-0.0310106	-0.0446392	NA	STYX	-0.0638712	0.95775	-0.0378249	0.921402	CENTER
BORC6_173	sp|Q9D6W8|BORC6_MOUSE	Q9D6W8	173	0.999	GRAGRSFPSRLQDSRSLDGLSGACGGGGSSS	S	L	D	G	6	4	2	-1.08265	NA	-0.144685	0.0727564	0.280895	0.0138517	-0.0419465	NA	STYX	-0.218422	0.490015	-0.0140474	0.981513	CENTER
BORC6_201	sp|Q9D6W8|BORC6_MOUSE	Q9D6W8	201	0.998	SSSSGETGAGGGRRATISSPLELEGTVSRHG	T	I	S	S	8	5	3	0.182615	0.0614794	0.0505652	-0.15357	-0.128986	-0.217567	-1.34883	-0.737123	STYX	0.00242079	0.638267	-0.76784	0.0439844	CENTER
BORC6_204	sp|Q9D6W8|BORC6_MOUSE	Q9D6W8	204	0.99	SGETGAGGGRRATISSPLELEGTVSRHGDLT	S	P	L	E	8	5	3	0.50521	-0.346688	-0.0945665	-0.0298593	0.142676	0.24018	0.187724	0.562566	STYX	0.0353544	0.729924	0.330157	0.235126	CENTER
BORC6_43	sp|Q9D6W8|BORC6_MOUSE	Q9D6W8	43	0.998	RPSRTPSKPPSVRTLSGEEEAESVGVSSRHP	S	G	E	E	8	5	3	0.319158	-0.126808	0.105549	-0.0730547	-0.520706	-0.773194	-0.803527	-0.415219	STYX	-0.0591725	0.424209	-0.66398	0.0351843	CENTER
BOREA_175	sp|Q8BHX3|BOREA_MOUSE	Q8BHX3	175	0.981	KRTQSIQGRGRSKRLSHDFVTPAMSRLEPSL	S	H	D	F	6	4	2	0.83329	-0.120902	NA	-0.00432351	-0.405872	NA	-0.0832854	0.149001	STYX	0.075548	0.498573	0.032858	0.890781	CENTER
BOREA_228	sp|Q8BHX3|BOREA_MOUSE	Q8BHX3	228	0.999	TPAAKEQVYNISINGSPLADSKEISLSVPIG	S	P	L	A	7	4	3	1.55263	0.0582103	0.251491	NA	-0.128815	0.438511	0.517834	0.408184	STYX	0.43338	0.330301	0.454843	0.11378	CENTER
BORG4_116	sp|Q9JM96|BORG4_MOUSE	Q9JM96	116	1	LGSLRDSALFVKNAMSLPQLNEKEAAEKDSS	S	L	P	Q	7	4	3	0.785783	-0.631605	0.019887	0.152872	NA	-0.285658	-0.863973	-0.42696	STYX	0.0817344	0.750295	-0.52553	0.0861489	CENTER
BORG4_136 138 139 140	sp|Q9JM96|BORG4_MOUSE	Q9JM96	136 138 139 140	0.894	NEKEAAEKDSSKLPKSLSSSPVKKADARDGG KEAAEKDSSKLPKSLSSSPVKKADARDGGPK EAAEKDSSKLPKSLSSSPVKKADARDGGPKS AAEKDSSKLPKSLSSSPVKKADARDGGPKSP	S	L	S	S	6	3	3	0.682154	-0.409864	0.297122	NA	NA	-0.1839	0.0431136	-0.460243	STYX	0.189804	0.48066	-0.200343	0.47403	CENTER
BORG4_138 139 140	sp|Q9JM96|BORG4_MOUSE	Q9JM96	138 139 140	0.899	KEAAEKDSSKLPKSLSSSPVKKADARDGGPK EAAEKDSSKLPKSLSSSPVKKADARDGGPKS AAEKDSSKLPKSLSSSPVKKADARDGGPKSP	S	S	S	P	7	4	3	NA	-0.00262778	-0.275167	-0.301535	0.1644	0.33537	0.257163	-0.0221894	STYX	-0.103732	0.21104	0.190114	0.464996	CENTER
BORG4_140	sp|Q9JM96|BORG4_MOUSE	Q9JM96	140	0.997	AAEKDSSKLPKSLSSSPVKKADARDGGPKSP	S	P	V	K	7	4	3	0.904749	-0.0285605	-0.134935	0.0680645	NA	0.0566955	0.483832	0.094104	STYX	0.202329	0.869627	0.211544	0.434771	CENTER
BORG5_121	sp|Q91W92|BORG5_MOUSE	Q91W92	121	0.999	SPAPPPISPIIKNAISLPQLNQATYDSLVMG	S	L	P	Q	5	2	3	0.415844	0.0587324	NA	NA	NA	-0.32076	-0.637522	-0.26802	STYX	0.237288	0.240027	-0.408767	0.149915	CENTER
BORG5_207	sp|Q91W92|BORG5_MOUSE	Q91W92	207	0.995	FPSEPTPNPELRRSDSLLSFRFDLDLGPSLL	S	L	L	S	7	4	3	0.954622	0.0172125	NA	-0.00309262	-0.789403	-0.755045	-0.742507	0.185991	STYX	0.0448348	0.837024	-0.437187	0.193473	CENTER
BORG5_332	sp|Q91W92|BORG5_MOUSE,sp|Q91W92|BORG5_MOUSE	Q91W92	332	0.998	GPQVPSNMTFDRHGASWGASRASWGASRASR	S	W	G	A	5	2	3	0.536894	-0.618599	NA	NA	NA	-0.347788	-0.418327	-0.210891	STYX	-0.0408524	0.912435	-0.325669	0.22485	CENTER
BORG5_34	sp|Q91W92|BORG5_MOUSE	Q91W92	34	0.996	SPVGWVSSSHGKRRLTADMISPPLGDFRHTM	T	A	D	M	4	2	2	0.768683	NA	NA	NA	-0.154748	-0.370312	NA	-0.0248269	STYX	0.306968	0.778132	-0.197569	0.552587	CENTER
BPL1_124	sp|Q920N2|BPL1_MOUSE	Q920N2	124	0.995	CLELENSTIDSVRSASAENIPDLPCDHSGVE	S	A	E	N	8	5	3	-0.180762	0.0900967	0.0691025	0.172189	0.205803	-0.249986	-0.13725	-0.295312	STYX	0.0712861	0.568356	-0.227516	0.390633	CENTER
BPNT1_197	sp|Q9Z0S1|BPNT1_MOUSE	Q9Z0S1	197	0.994	LKEAPAGKHIITTTRSHSNQLVTDCISAMNP	S	H	S	N	7	5	2	0.117383	0.145061	0.287585	0.0891858	-0.0038453	NA	-0.268078	0.307325	STYX	0.127074	0.220852	0.0196236	0.951097	CENTER
BPNT1_42	sp|Q9Z0S1|BPNT1_MOUSE	Q9Z0S1	42	0.99	RCVIAEGDLGIVQKTSATDLQTKADRLVQMS	S	A	T	D	6	3	3	-0.0110085	-0.266622	-0.0692536	NA	NA	0.771172	0.756073	0.903748	STYX	-0.115628	0.130764	0.810331	0.0200589	CENTER
BRAF_135	sp|P28028|BRAF_MOUSE	P28028	135	1	LVFQTPTDASRNNPKSPQKPIVRVFLPNKQR	S	P	Q	K	8	5	3	0.110971	0.093248	-0.185861	-0.0955433	-0.200254	0.26377	0.188307	-0.0175368	STYX	-0.0554879	0.231821	0.144847	0.559152	CENTER
BRAF_346 347 348	sp|P28028|BRAF_MOUSE	P28028	346 347 348	0.899	PADEDHRNQFGQRDRSSSAPNVHINTIEPVN ADEDHRNQFGQRDRSSSAPNVHINTIEPVNI DEDHRNQFGQRDRSSSAPNVHINTIEPVNID	S	S	S	A	7	4	3	0.272581	0.370164	NA	0.553442	-0.0504491	-0.15181	0.0313978	0.123578	STYX	0.286434	0.0800387	0.00105551	0.967737	CENTER
BRAF_348	sp|P28028|BRAF_MOUSE	P28028	348	0.971	DEDHRNQFGQRDRSSSAPNVHINTIEPVNID	S	A	P	N	5	2	3	0.313369	0.40953	NA	NA	NA	0.25808	0.122055	0.370386	STYX	0.36145	0.0541325	0.250174	0.335465	CENTER
BRAF_483	sp|P28028|BRAF_MOUSE	P28028	483	0.989	SSEDRSRMKTLGRRDSSDDWEIPDGQITVGQ	S	S	D	D	5	2	3	0.0201809	0.605245	NA	NA	NA	-0.0717319	-0.242312	-0.232163	STYX	0.312713	0.289313	-0.182069	0.494493	CENTER
BRAF_766	sp|P28028|BRAF_MOUSE	P28028	766	0.997	IELLARSLPKIHRSASEPSLNRAGFQTEDFS	S	E	P	S	8	5	3	0.228307	-0.177422	-0.120981	-0.0521098	0.0534421	0.394675	0.447742	0.388083	STYX	-0.0137528	0.42235	0.410167	0.14231	CENTER
BRAP_116	sp|Q99MP8|BRAP_MOUSE	Q99MP8	116	0.998	QRSREQSESVNTAPESPSKQLPDQISFFSGN	S	P	S	K	5	3	2	-0.323045	0.315606	-0.0554168	NA	NA	-0.0150084	0.259558	NA	STYX	-0.0209519	0.575273	0.122275	0.690007	CENTER
BRAT1_684 685	sp|Q8C3R1|BRAT1_MOUSE	Q8C3R1	684 685	0.894	QPSLHCPYTVGLPRASSPRPHPEFLQTLCRL PSLHCPYTVGLPRASSPRPHPEFLQTLCRLP	S	S	P	R	7	4	3	0.283459	-0.135074	0.159009	NA	0.103354	-0.546584	-0.597017	-0.696215	STYX	0.102687	0.482836	-0.613272	0.0411863	CENTER
BRAT1_685	sp|Q8C3R1|BRAT1_MOUSE	Q8C3R1	685	0.979	PSLHCPYTVGLPRASSPRPHPEFLQTLCRLP	S	P	R	P	5	2	3	6.3e-05	0.104614	NA	NA	NA	-0.41502	-0.882692	-0.70064	STYX	0.0523386	0.839787	-0.666117	0.0357335	CENTER
BRAT1_735 736	sp|Q8C3R1|BRAT1_MOUSE	Q8C3R1	735 736	0.897	ACDLLLFLRDKTVPCSSPREAGDSPNSASVE CDLLLFLRDKTVPCSSPREAGDSPNSASVEA	S	S	P	R	7	4	3	0.186714	-0.0622996	0.0464799	NA	-0.370715	-0.559232	-0.848547	-0.939394	STYX	-0.0499552	0.51832	-0.782391	0.0193762	CENTER
BRAT1_736	sp|Q8C3R1|BRAT1_MOUSE	Q8C3R1	736	0.988	CDLLLFLRDKTVPCSSPREAGDSPNSASVEA	S	P	R	E	6	3	3	0.014004	0.244435	0.506254	NA	NA	-0.892319	-0.712991	-0.468886	STYX	0.254898	0.144394	-0.691399	0.0302909	CENTER
BRAT1_743	sp|Q8C3R1|BRAT1_MOUSE	Q8C3R1	743	0.998	RDKTVPCSSPREAGDSPNSASVEAALQRWRE	S	P	N	S	8	5	3	0.19015	0.273058	0.208875	0.0584315	0.00747705	-0.419667	-0.411555	-0.728729	STYX	0.147598	0.15217	-0.519984	0.0750786	CENTER
BRCA1_1199	sp|P48754|BRCA1_MOUSE	P48754	1199	0.998	EDLPCFQHLLSRISNTPELTRCSSAVTQRMP	T	P	E	L	7	5	2	1.09762	-1.09602	-1.11222	-0.324364	-0.375665	-0.193081	NA	-0.355297	STYX	-0.36213	0.0263191	-0.274189	0.398055	CENTER
BRCA1_502 503 504	sp|P48754|BRCA1_MOUSE	P48754	502 503 504	0.883	ITQEQPFTNKLKRKRSTSLQPEDFIKKADSA TQEQPFTNKLKRKRSTSLQPEDFIKKADSAG QEQPFTNKLKRKRSTSLQPEDFIKKADSAGV	S	T	S	L	6	4	2	NA	-0.0348953	-0.026325	-0.0735432	-0.247027	-0.43505	NA	-0.414749	STYX	-0.0954477	0.103583	-0.4249	0.204762	CENTER
BRCA1_686	sp|P48754|BRCA1_MOUSE	P48754	686	1	AKKNEPNEHIRKRRASDAFPEEKLMNKAGLL	S	D	A	F	8	5	3	0.307329	-0.058273	0.182868	0.0342655	0.457746	-0.168208	-0.48394	-0.637822	STYX	0.184787	0.177951	-0.42999	0.137608	CENTER
BRCA1_705 706	sp|P48754|BRCA1_MOUSE	P48754	705 706	0.894	PEEKLMNKAGLLTSCSSPRKSQGPVNPSPQR EEKLMNKAGLLTSCSSPRKSQGPVNPSPQRT	S	S	P	R	4	2	2	NA	NA	-0.0580864	-0.23088	NA	NA	0.0948371	-0.312534	STYX	-0.144483	0.128395	-0.108849	0.756869	CENTER
BRCA1_706	sp|P48754|BRCA1_MOUSE	P48754	706	0.984	EEKLMNKAGLLTSCSSPRKSQGPVNPSPQRT	S	P	R	K	7	4	3	0.418597	-0.500366	-0.183486	NA	-0.22012	-0.197877	0.32233	-0.133849	STYX	-0.121344	0.133223	-0.00313183	0.989065	CENTER
BRCA1_717	sp|P48754|BRCA1_MOUSE	P48754	717	0.999	TSCSSPRKSQGPVNPSPQRTGTEQLETRQMS	S	P	Q	R	7	4	3	NA	-0.0647429	-0.310288	-0.708098	-0.171096	-0.00497188	0.0187265	-0.10417	STYX	-0.313556	0.0078357	-0.0301384	0.93069	CENTER
BRCA1_967	sp|P48754|BRCA1_MOUSE	P48754	967	0.992	GKSGISQNSHFKQSVSPIRSSIKTDNRKPLT	S	P	I	R	6	4	2	NA	-0.633613	-0.678362	-0.867454	-0.536377	-0.270633	NA	-0.0509923	STYX	-0.678952	0.000651082	-0.160813	0.625945	CENTER
BRCA2_125	sp|P97929|BRCA2_MOUSE	P97929	125	1	HSKKKTKVDPVVDVASPPLKSCLSESPLTLR	S	P	P	L	5	3	2	1.52305	-0.426162	NA	0.247768	NA	-0.0391823	NA	-0.0808792	STYX	0.448219	0.492468	-0.0600308	0.866502	CENTER
BRCA2_1758	sp|P97929|BRCA2_MOUSE	P97929	1758	0.997	SDVPPDMKNAEGNTISPRVSATKERNLHPQT	S	P	R	V	6	3	3	0.614604	-0.173279	-0.0666526	NA	NA	0.561149	0.309406	0.204972	STYX	0.124891	0.783031	0.358509	0.199682	CENTER
BRCA2_487	sp|P97929|BRCA2_MOUSE	P97929	487	0.998	AGKQMVSRTSQAACLSPSIRKSIFKMREPLD	S	P	S	I	8	5	3	0.584466	-0.0128075	-0.122067	-0.064034	0.0922981	-0.0750491	0.350401	-0.437371	STYX	0.0955712	0.943404	-0.0540063	0.852926	CENTER
BRD2_297	sp|Q7JJ13|BRD2_MOUSE	Q7JJ13	297	0.999	ADTTTPTPTAILAPGSPASPPGSLEPKAARL	S	P	A	S	7	4	3	NA	0.0583749	0.28218	0.402322	-0.0232647	-0.299397	-0.472709	-0.0644046	STYX	0.179903	0.221491	-0.278837	0.310213	CENTER
BRD2_631	sp|Q7JJ13|BRD2_MOUSE	Q7JJ13	631	0.998	KSQKTAPPVLPTGYDSEEEEESRPMSYDEKR	S	E	E	E	5	3	2	0.259475	-0.183036	NA	-0.0241449	NA	NA	-0.542647	-0.56858	STYX	0.0174313	0.731477	-0.555613	0.119087	CENTER
BRD3_247 248 249	sp|Q8K2F0|BRD3_MOUSE	Q8K2F0	247 248 249	0.887	TPPVVKKKGVKRKADTTTPTTSAITASRSES PPVVKKKGVKRKADTTTPTTSAITASRSESP PVVKKKGVKRKADTTTPTTSAITASRSESPP	T	T	T	P	7	4	3	-0.0274623	0.381481	-0.0778089	-0.138198	NA	0.807279	0.630164	0.0783069	STYX	0.0345029	0.592003	0.50525	0.118688	CENTER
BRD3_249	sp|Q8K2F0|BRD3_MOUSE	Q8K2F0	249	0.996	PVVKKKGVKRKADTTTPTTSAITASRSESPP	T	P	T	T	5	3	2	0.063067	0.525291	0.37072	NA	NA	0.615285	NA	0.00376305	STYX	0.319693	0.0673914	0.309524	0.410512	CENTER
BRD3_262	sp|Q8K2F0|BRD3_MOUSE	Q8K2F0	262	0.998	TTTPTTSAITASRSESPPPLSEPKQAKVVAR	S	P	P	P	8	5	3	0.249915	-0.171221	0.0799652	-0.0300086	0.0304939	0.0788888	-0.05486	-0.21027	STYX	0.0318289	0.908933	-0.0620806	0.83086	CENTER
BRD3_564	sp|Q8K2F0|BRD3_MOUSE	Q8K2F0	564	0.999	RQLKKGGKQASASYDSEEEEEGLPMSYDEKR	S	E	E	E	7	5	2	0.0302707	-0.0616882	0.303318	0.0646704	0.820895	NA	-0.136833	-0.221878	STYX	0.231493	0.27224	-0.179356	0.579291	CENTER
BRD4_1153	sp|Q9ESU6|BRD4_MOUSE	Q9ESU6	1153	1	VQPQPLVVVKEEKIHSPIIRSEPFSTSLRPE	S	P	I	I	6	3	3	0.948559	-0.760634	NA	0.60291	NA	0.567007	-0.291421	-0.203561	STYX	0.263612	0.375754	0.0240086	0.994506	CENTER
BRD4_470 471	sp|Q9ESU6|BRD4_MOUSE	Q9ESU6	470 471	0.876	FAKMPDEPEEPVVTVSSPAVPPPTKVVAPPS AKMPDEPEEPVVTVSSPAVPPPTKVVAPPSS	S	S	P	A	8	5	3	0.411172	0.050556	0.286628	0.250771	-0.0690663	0.112456	-0.350717	-0.526675	STYX	0.186012	0.152229	-0.254979	0.375034	CENTER
BRD7_279	sp|O88665|BRD7_MOUSE	O88665	279	0.997	QSGEDSGCWQREREDSGDAETQAFRSPAKDN	S	G	D	A	8	5	3	0.361393	-0.132762	0.131449	-0.347421	-0.258419	0.327294	0.262847	0.00867094	STYX	-0.049152	0.324098	0.199604	0.441485	CENTER
BRD8_175	sp|Q8R3B7|BRD8_MOUSE	Q8R3B7	175	1	RKATDAAYQARQAVKTPPRRLPTVMVRSPVD	T	P	P	R	8	5	3	1.11859	-0.187502	0.0614255	-0.24294	-0.326609	0.912748	0.839549	0.762131	STYX	0.0845927	0.26685	0.838142	0.0177606	NR
BRD8_264	sp|Q8R3B7|BRD8_MOUSE	Q8R3B7	264	0.999	ITDDSPQKKMLGQKATPPPSPLLSELLKKGS	T	P	P	P	5	2	3	0.704456	-0.0359251	NA	NA	NA	0.855117	0.426958	0.826125	STYX	0.334265	0.438624	0.702733	0.0364214	CENTER
BRD8_268	sp|Q8R3B7|BRD8_MOUSE	Q8R3B7	268	0.999	SPQKKMLGQKATPPPSPLLSELLKKGSLLPT	S	P	L	L	5	2	3	0.81124	-0.283391	NA	NA	NA	-1.47349	0.635818	1.114	STYX	0.263924	0.93689	0.0921108	0.556636	CENTER
BRD8_283 284	sp|Q8R3B7|BRD8_MOUSE	Q8R3B7	283 284	0.898	SPLLSELLKKGSLLPTSPRLVNESEMPVPPG PLLSELLKKGSLLPTSPRLVNESEMPVPPGH	T	S	P	R	8	5	3	0.733133	-0.494934	0.0833156	0.0282567	-0.049246	0.196513	0.489184	0.0851695	STYX	0.0601049	0.893927	0.256955	0.339777	CENTER
BRD8_284	sp|Q8R3B7|BRD8_MOUSE	Q8R3B7	284	0.984	PLLSELLKKGSLLPTSPRLVNESEMPVPPGH	S	P	R	L	7	4	3	1.01678	-0.6306	0.231054	NA	-0.425339	0.267152	0.896666	0.630528	STYX	0.0479743	0.766686	0.598115	0.0669918	CENTER
BRD9_103	sp|Q3UQU0|BRD9_MOUSE	Q3UQU0	103	1	RKEEKKRKREKEHCDSEGEADAFDPGKKVEV	S	E	G	E	5	2	3	0.539034	-0.112604	NA	NA	NA	0.184423	0.0448344	-0.0864709	STYX	0.213215	0.722622	0.0475954	0.82284	CENTER
BRD9_565	sp|Q3UQU0|BRD9_MOUSE	Q3UQU0	565	0.981	SSLSTASEREHPPPGSPSRLSVGEQPDVAHD	S	P	S	R	6	3	3	0.339631	-0.544046	0.248163	NA	NA	0.613268	0.502704	0.517651	STYX	0.0145828	0.653776	0.544541	0.0710976	CENTER
BRD9_567	sp|Q3UQU0|BRD9_MOUSE	Q3UQU0	567	0.962	LSTASEREHPPPGSPSRLSVGEQPDVAHDPY	S	R	L	S	5	2	3	0.793474	-0.67119	NA	NA	NA	0.548366	0.384301	0.252103	STYX	0.0611418	0.964275	0.394924	0.161958	CENTER
BRDT_186	sp|Q91Y44|BRDT_MOUSE	Q91Y44	186	0.998	FKRQEIPSGLPDISLSPLNMAQEAPPICDSQ	S	P	L	N	5	2	3	0.476965	0.479773	NA	NA	NA	0.952019	0.369266	-0.000724273	STYX	0.478369	0.0333352	0.440187	0.193198	CENTER
BRDT_230	sp|Q91Y44|BRDT_MOUSE	Q91Y44	230	0.998	DTTTPTTSIAKASSESPPTLRETKPVNMPVK	S	P	P	T	8	5	3	0.760294	-0.315295	-0.175793	-0.0990454	-0.0276676	0.388139	0.23174	0.351185	STYX	0.0284987	0.230529	0.323688	0.226335	CENTER
BRE1A_136	sp|Q5DTM8|BRE1A_MOUSE	Q5DTM8	136	0.992	LTERKALVVPEPEPDSDSNQERKDDRERGDG	S	D	S	N	8	5	3	0.736967	-0.12756	0.160113	-0.0279322	-0.307153	-0.207228	-0.141116	-0.210215	STYX	0.0868872	0.754582	-0.186186	0.478583	CENTER
BRE1A_138	sp|Q5DTM8|BRE1A_MOUSE	Q5DTM8	138	0.993	ERKALVVPEPEPDSDSNQERKDDRERGDGQE	S	N	Q	E	6	3	3	0.213157	0.0338767	NA	0.103261	NA	-0.312714	-0.298131	-0.577896	STYX	0.116765	0.363485	-0.396247	0.155556	CENTER
BRPF1_84	sp|B2RRD7|BRPF1_MOUSE	B2RRD7	84	0.996	RPANKQSPSPSEVSQSPGREVMSYAQAQRMV	S	P	G	R	5	2	3	-0.0688594	0.374644	NA	NA	NA	-0.196584	-0.334228	-0.0527027	STYX	0.152892	0.668416	-0.194505	0.468024	CENTER
BRPF1_924	sp|B2RRD7|BRPF1_MOUSE	B2RRD7	924	0.999	PPKNRESQMTPSHGGSPVGPPQLPIMGSLRQ	S	P	V	G	8	5	3	0.384132	0.356114	0.284162	0.196465	-0.0127244	-0.0848818	-0.252926	-0.157989	STYX	0.24163	0.0388361	-0.165266	0.538297	CENTER
BRSK1_443	sp|Q5RJI5|BRSK1_MOUSE	Q5RJI5	443	0.996	QRSRSVSGASTGLSSSPLSSPRSPVFSFSPE	S	P	L	S	5	3	2	NA	0.0211106	-0.234065	-0.127384	NA	NA	-0.846383	-0.0668809	STYX	-0.113446	0.125105	-0.456632	0.266757	CENTER
BRSK1_450	sp|Q5RJI5|BRSK1_MOUSE	Q5RJI5	450	0.998	GASTGLSSSPLSSPRSPVFSFSPEPGAGDEA	S	P	V	F	4	2	2	NA	0.0337708	6.6152	NA	NA	-0.195512	NA	0.209462	STYX	3.32449	0.213248	0.00697465	0.966103	NR
BRSK1_508	sp|Q5RJI5|BRSK1_MOUSE	Q5RJI5	508	0.999	PPPSARSTPLPGPPGSPRSSGGTPLHSPLHT	S	P	R	S	8	5	3	0.117989	-0.233582	-0.0943072	-0.0414575	-0.136628	0.223147	0.147592	0.0795498	STYX	-0.0775969	0.1147	0.150096	0.532926	CENTER
BRSK1_563	sp|Q5RJI5|BRSK1_MOUSE,sp|Q69Z98|BRSK2_MOUSE	Q5RJI5	563	0.999	AWRSRLNSIRNSFLGSPRFHRRKMQVPTAEE	S	P	R	F	7	4	3	NA	-0.530651	-0.152836	0.203554	-0.353053	0.0457686	-0.0919451	0.342429	STYX	-0.208246	0.0769345	0.098751	0.696369	CENTER
BRSK1_758	sp|Q5RJI5|BRSK1_MOUSE	Q5RJI5	758	0.975	SLQPPPGRSDPDLSSSPRRGPPKDKKLLATN	S	P	R	R	5	2	3	0.527031	-0.389152	NA	NA	NA	0.597869	-0.377335	0.473646	STYX	0.0689396	0.947576	0.231393	0.468844	CENTER
BRSK2_368	sp|Q69Z98|BRSK2_MOUSE	Q69Z98	368	1	LPPRNEIDPPRKRVDSPMLNRHGKRRPERKS	S	P	M	L	7	5	2	0.0860927	-0.00846539	-0.109176	0.451883	-0.359721	NA	-0.201375	0.250252	STYX	0.0121227	0.636862	0.0244384	0.932983	CENTER
BRSK2_424	sp|Q69Z98|BRSK2_MOUSE	Q69Z98	424	0.998	QRSRSISGASSGLSTSPLSSPRVTPHPSPRG	S	P	L	S	8	5	3	0.272282	0.0240476	0.0591946	-0.0312152	-0.232942	-0.195903	0.153941	-0.213274	STYX	0.0182734	0.798785	-0.0850786	0.761547	CENTER
BRSK2_436	sp|Q69Z98|BRSK2_MOUSE	Q69Z98	436	0.999	LSTSPLSSPRVTPHPSPRGSPLPTPKGTPVH	S	P	R	G	8	5	3	1.42692	-0.433923	0.225406	0.155275	-0.752843	-0.149652	-0.251514	0.312675	STYX	0.124166	0.929402	-0.0294968	0.909673	CENTER
BRSK2_440	sp|Q69Z98|BRSK2_MOUSE	Q69Z98	440	0.987	PLSSPRVTPHPSPRGSPLPTPKGTPVHTPKE	S	P	L	P	5	2	3	NA	-0.308998	0.0691266	NA	NA	-0.0297275	-0.532199	-0.386655	STYX	-0.119936	0.368577	-0.316194	0.262428	CENTER
BRWD1_1751	sp|Q921C3|BRWD1_MOUSE	Q921C3	1751	0.99	SHTAATCKTKSRPIESSEEDSRCHGSDHGPS	S	S	E	E	5	2	3	0.24242	0.500891	NA	NA	NA	0.136109	0.207478	-0.458441	STYX	0.371656	0.0616299	-0.0382846	0.938026	CENTER
BRWD1_1789	sp|Q921C3|BRWD1_MOUSE	Q921C3	1789	0.999	SGQKLRADSISEEADSEPESSVLCKNTHLCK	S	E	P	E	5	3	2	NA	0.00611273	0.0631263	0.0463493	NA	NA	-0.0029974	-0.388088	STYX	0.0385294	0.913702	-0.195543	0.563815	CENTER
BRWD1_1810	sp|Q921C3|BRWD1_MOUSE	Q921C3	1810	0.989	VLCKNTHLCKKAKILSDSEDCEEKCGERRGP	S	D	S	E	8	5	3	0.650083	-0.324914	0.409299	-0.148232	-0.117606	0.327664	0.230411	-0.261398	STYX	0.0937263	0.709086	0.0988921	0.697853	CENTER
BRWD1_1830	sp|Q921C3|BRWD1_MOUSE	Q921C3	1830	0.998	CEEKCGERRGPEVEGSPVSEALREAILAPQC	S	P	V	S	8	5	3	0.431524	0.0176661	0.306961	-0.169326	-0.203704	-0.137478	-0.341275	-0.46916	STYX	0.0766243	0.98269	-0.315971	0.246247	CENTER
BRWD1_1857	sp|Q921C3|BRWD1_MOUSE	Q921C3	1857	0.999	APQCLSHRGSETDVDSDGGAVREKSYSNENG	S	D	G	G	6	3	3	0.224035	1.40875	NA	-0.278877	NA	0.0103292	0.00479532	-0.198655	STYX	0.451302	0.475021	-0.061177	0.830443	CENTER
BRWD1_1902	sp|Q921C3|BRWD1_MOUSE	Q921C3	1902	0.999	KSSSDKESNLQVTQKSPKDRSSPSRITQRAS	S	P	K	D	6	4	2	-0.107406	0.171635	0.470999	NA	-0.0382628	-0.0813484	NA	-0.627466	STYX	0.124241	0.685835	-0.354407	0.335871	CENTER
BRWD1_1927	sp|Q921C3|BRWD1_MOUSE	Q921C3	1927	0.992	ITQRASVATDKMKLTSDAEDLSLESVCTRSK	S	D	A	E	5	2	3	0.436499	0.00275351	NA	NA	NA	-0.188628	-0.530352	-0.447815	STYX	0.219626	0.377274	-0.388931	0.163044	CENTER
BRWD1_697	sp|Q921C3|BRWD1_MOUSE	Q921C3	697	0.984	PSGEGTPRRGSFRRLSLDIQSPPNIGLRRSG	S	L	D	I	6	4	2	0.942123	0.11992	0.114146	NA	-0.143153	NA	-0.724021	-0.234933	STYX	0.258259	0.406187	-0.479477	0.194488	CENTER
BRWD1_702	sp|Q921C3|BRWD1_MOUSE	Q921C3	702	0.999	TPRRGSFRRLSLDIQSPPNIGLRRSGQVEGV	S	P	P	N	7	4	3	0.359204	-0.207739	NA	0.0239137	-0.103638	-0.0224584	-0.145255	0.0287783	STYX	0.017935	0.58498	-0.0463116	0.877743	CENTER
BSDC1_384 385 386	sp|Q80Y55|BSDC1_MOUSE	Q80Y55	384 385 386	0.875	SDSGKSTPSNNGKKGSSTDISEDWEKDFDLD DSGKSTPSNNGKKGSSTDISEDWEKDFDLDM SGKSTPSNNGKKGSSTDISEDWEKDFDLDMT	S	S	T	D	4	2	2	0.639018	0.280405	NA	NA	NA	NA	-0.0211256	0.902377	STYX	0.459711	0.0465041	0.440626	0.325855	CENTER
BSN_105	sp|O88737|BSN_MOUSE	O88737	105	0.999	SPTPKQASATAPGRESPRETRAQGPSGQEAE	S	P	R	E	8	5	3	0.100083	-0.701843	0.0440553	-0.139006	0.438943	0.659969	0.68568	0.903027	STYX	-0.0515533	0.715725	0.749559	0.0270411	CENTER
BSPRY_46	sp|Q80YW5|BSPRY_MOUSE	Q80YW5	46	1	ESRPKPGPGPEPRPESGPEPGPRSGLRRGPK	S	G	P	E	4	2	2	-0.317146	-0.18072	NA	NA	NA	0.645865	0.68636	NA	STYX	-0.248933	0.040198	0.666112	0.0907548	CENTER
BSPRY_460	sp|Q80YW5|BSPRY_MOUSE	Q80YW5	460	1	LISIVRGPLATVRLDSPPHHPCRSGHASR__	S	P	P	H	8	5	3	0.011763	-0.276006	-0.092354	-0.0635277	-0.027923	1.33735	1.03964	1.14633	STYX	-0.0896096	0.0887165	1.17444	0.00657421	NR
BTBD7_722	sp|Q8CFE5|BTBD7_MOUSE	Q8CFE5	722	0.999	QNPHKFFPDERFGDESPLLTMRQPGRCRVNS	S	P	L	L	5	2	3	1.10281	-0.446676	NA	NA	NA	0.485044	0.0155684	0.479443	STYX	0.328065	0.989743	0.326685	0.254819	CENTER
BTBD7_994	sp|Q8CFE5|BTBD7_MOUSE	Q8CFE5	994	0.993	ASPNGLKSVYLPGQTSPKKQEDPRREYPPSP	S	P	K	K	5	3	2	0.652483	-0.212039	-0.178144	NA	NA	NA	-0.200134	-0.0195367	STYX	0.0874332	0.512317	-0.109835	0.739001	CENTER
BTBD9_592	sp|Q8C726|BTBD9_MOUSE	Q8C726	592	0.99	STPNQQLDPHAPRAPSASSLPPSPGPNSRSP	S	A	S	S	4	2	2	NA	0.185822	-0.012442	NA	NA	NA	-0.0575525	-0.349335	STYX	0.0866901	0.675584	-0.203444	0.538005	CENTER
BTBD9_594 595	sp|Q8C726|BTBD9_MOUSE	Q8C726	594 595	0.861	PNQQLDPHAPRAPSASSLPPSPGPNSRSPNQ NQQLDPHAPRAPSASSLPPSPGPNSRSPNQQ	S	S	L	P	6	4	2	-0.681135	0.259752	0.0497724	0.106981	NA	0.203527	-0.286647	NA	STYX	-0.0661573	0.940143	-0.0415601	0.918022	CENTER
BTBDA_119	sp|Q80X66|BTBDA_MOUSE	Q80X66	119	0.998	DHSSSRPSSPRPQRASPNGSMSSAGNSSRNS	S	P	N	G	4	2	2	-0.324839	-0.206657	NA	NA	NA	0.405224	0.631043	NA	STYX	-0.265748	0.034759	0.518133	0.157262	CENTER
BTBDA_91 92	sp|Q80X66|BTBDA_MOUSE	Q80X66	91 92	0.895	HERAESQLTPCIRNVTSPTRQHHIEREKDHS ERAESQLTPCIRNVTSPTRQHHIEREKDHSS	T	S	P	T	8	5	3	0.063974	-0.280154	0.0106859	-0.341413	-0.150043	0.714759	0.815944	0.33082	STYX	-0.13939	0.0572416	0.620508	0.0550639	CENTER
BTBDI_174	sp|A0A0A6YY25|BTBDI_MOUSE	A0A0A6YY25	174	0.998	PKSRPQTPLPVTQTPSPLGAVRLKSLGEEEG	S	P	L	G	7	5	2	0.272403	-0.155284	0.0153806	0.0643839	0.0400334	-0.242862	NA	0.147356	STYX	0.0473835	0.934753	-0.047753	0.903869	CENTER
BTBDI_335	sp|A0A0A6YY25|BTBDI_MOUSE	A0A0A6YY25	335	1	PDPSDVGKPAENKKQSPELRAPTSSSVEEGQ	S	P	E	L	7	4	3	0.882169	-0.107416	-0.167919	NA	0.0280439	0.215804	1.1504	0.965599	STYX	0.158719	0.740217	0.777269	0.0413458	CENTER
BTBDI_414	sp|A0A0A6YY25|BTBDI_MOUSE	A0A0A6YY25	414	0.995	VNEQEIPARIQLCQDSPESPRLQDILLSASH	S	P	E	S	7	4	3	0.331787	0.0436136	0.0712034	0.0760304	NA	0.0213386	0.380406	0.138989	STYX	0.130659	0.300456	0.180245	0.486419	CENTER
BTBDI_430	sp|A0A0A6YY25|BTBDI_MOUSE	A0A0A6YY25	430	0.997	PESPRLQDILLSASHSPDHPMVKSEFGSSPM	S	P	D	H	4	2	2	0.854687	0.0159143	NA	NA	NA	NA	0.287549	0.453745	STYX	0.435301	0.27589	0.370647	0.272942	CENTER
BTBDI_443	sp|A0A0A6YY25|BTBDI_MOUSE	A0A0A6YY25	443	0.994	SHSPDHPMVKSEFGSSPMLTGKESDLNIDCR	S	P	M	L	5	2	3	1.00846	-0.275523	NA	NA	NA	0.556782	0.421693	0.563905	STYX	0.366466	0.916333	0.514127	0.0839214	CENTER
BTBDI_567	sp|A0A0A6YY25|BTBDI_MOUSE	A0A0A6YY25	567	1	EKEPVSENKEPVEPFSPLVMRSENTESFEPL	S	P	L	V	7	4	3	1.10375	0.292389	-0.182231	0.292756	NA	0.0238118	0.0377532	0.342124	STYX	0.376665	0.154969	0.134563	0.59661	CENTER
BTBDI_583	sp|A0A0A6YY25|BTBDI_MOUSE	A0A0A6YY25	583	0.999	PLVMRSENTESFEPLSPLVMPSEVSREELSL	S	P	L	V	6	3	3	0.410786	0.0776923	0.763052	NA	NA	-0.00251753	-0.143797	0.134997	STYX	0.417177	0.0476873	-0.00377264	0.985759	CENTER
BUB1_579	sp|O08901|BUB1_MOUSE	O08901	579	0.999	DSTVCGIRCNKTLAPSPKSIGDFTSAAQLSS	S	P	K	S	8	5	3	0.219909	-0.415388	-0.138849	0.146985	-0.137751	0.453225	0.810972	0.511897	STYX	-0.0650188	0.328641	0.592031	0.0597086	CENTER
BUB1B_1050	sp|Q9Z1S0|BUB1B_MOUSE	Q9Z1S0	1050	0.999	EALLTQQDKQPGGSQSPA_____________	S	P	A	_	8	5	3	1.45997	0.354146	0.0970248	0.493454	-0.0469485	0.321092	0.579594	0.335233	STYX	0.471529	0.0471404	0.411973	0.147135	CENTER
BUB3_211	sp|Q9WVA3|BUB3_MOUSE	Q9WVA3	211	0.998	LSSIEGRVAVEYLDPSPEVQKKKYAFKCHRL	S	P	E	V	6	4	2	0.539296	-0.0150391	NA	-0.0473686	-0.0190506	NA	0.678576	0.24785	STYX	0.114459	0.925598	0.463213	0.21067	CENTER
BUD13_121	sp|Q8R149|BUD13_MOUSE	Q8R149	121	0.991	GGHGEDGHFHHDDQDSSPPRRVRHDTPDTSP	S	S	P	P	5	3	2	-0.193822	NA	-0.0801183	NA	0.00544528	-0.0536616	0.271687	NA	STYX	-0.0894983	0.163125	0.109013	0.723726	CENTER
BUD13_131 134 135	sp|Q8R149|BUD13_MOUSE	Q8R149	131 134 135	0.898	HDDQDSSPPRRVRHDTPDTSPPRKARHDTPD QDSSPPRRVRHDTPDTSPPRKARHDTPDPSP DSSPPRRVRHDTPDTSPPRKARHDTPDPSPP	T	P	D	T	8	5	3	-0.334099	0.267313	-0.20933	-0.392784	0.104802	-0.0192053	0.187514	-0.24291	STYX	-0.11282	0.191244	-0.0248672	0.947603	CENTER
BUD13_134 135	sp|Q8R149|BUD13_MOUSE,sp|Q8R149|BUD13_MOUSE	Q8R149	134 135	0.896	QDSSPPRRVRHDTPDTSPPRKARHDTPDPSP DSSPPRRVRHDTPDTSPPRKARHDTPDPSPP	T	S	P	P	8	5	3	0.185778	-0.184755	0.260013	-0.671672	0.709264	0.488456	0.359421	-0.250905	STYX	0.0597258	0.76349	0.198991	0.495085	CENTER
BUD13_135	sp|Q8R149|BUD13_MOUSE,sp|Q8R149|BUD13_MOUSE	Q8R149	135	0.988	DSSPPRRVRHDTPDTSPPRKARHDTPDPSPP	S	P	P	R	5	2	3	0.508149	-0.439745	NA	NA	NA	0.0796165	0.34991	-0.468721	STYX	0.0342019	0.923613	-0.0130647	0.991732	CENTER
BUD13_148	sp|Q8R149|BUD13_MOUSE,sp|Q8R149|BUD13_MOUSE,sp|Q8R149|BUD13_MOUSE,sp|Q8R149|BUD13_MOUSE	Q8R149	148	0.999	DTSPPRKARHDTPDPSPPRKARHDTPDTSPP	S	P	P	R	8	5	3	0.173983	-0.250782	0.404276	-0.407594	0.784972	0.387379	0.277586	-0.0345494	STYX	0.140971	0.713793	0.210139	0.432337	CENTER
BUD13_157 160 161	sp|Q8R149|BUD13_MOUSE	Q8R149	157 160 161	0.865	HDTPDPSPPRKARHDTPDTSPPRKARHDTPD PDPSPPRKARHDTPDTSPPRKARHDTPDPSP DPSPPRKARHDTPDTSPPRKARHDTPDPSPP	T	P	D	T	6	4	2	-0.703953	NA	-0.255894	-0.0327742	0.148244	0.303241	0.744165	NA	STYX	-0.211094	0.140494	0.523703	0.16841	CENTER
BUD13_187	sp|Q8R149|BUD13_MOUSE,sp|Q8R149|BUD13_MOUSE	Q8R149	187	0.998	DPSPPRKARHDTPDPSPPRRVRHDTPDLSPP	S	P	P	R	7	5	2	0.0660881	-0.156153	0.284383	-0.012351	0.91647	NA	0.245963	0.237179	STYX	0.219688	0.477528	0.241571	0.43969	CENTER
BUD13_200	sp|Q8R149|BUD13_MOUSE,sp|Q8R149|BUD13_MOUSE	Q8R149	200	0.999	DPSPPRRVRHDTPDLSPPRRVRHDTPDLSPP	S	P	P	R	8	5	3	0.287796	-0.183502	0.254535	-0.298534	0.414191	0.495159	0.217954	-0.163354	STYX	0.0948971	0.672219	0.183253	0.514212	CENTER
BUD13_238	sp|Q8R149|BUD13_MOUSE	Q8R149	238	1	PDPSPPRRVRHDLDASPPRKSHRNSSAVSPR	S	P	P	R	8	5	3	0.46802	-0.164836	-0.150937	-0.145127	-0.194575	0.0130444	0.166912	0.0427798	STYX	-0.0374912	0.109532	0.0742453	0.74267	CENTER
BUD13_251	sp|Q8R149|BUD13_MOUSE	Q8R149	251	0.999	DASPPRKSHRNSSAVSPRRGHHGSLGTSSPR	S	P	R	R	8	5	3	-0.257264	1.54003	0.151338	0.443918	0.513313	0.755019	0.590378	-0.0286476	STYX	0.478266	0.0750788	0.438916	0.174505	CENTER
BUD13_297	sp|Q8R149|BUD13_MOUSE	Q8R149	297	1	LDSSGTQHLRRAHHESPDLELHKAKSSKAAE	S	P	D	L	8	5	3	0.933043	0.26591	-0.140903	0.145736	0.136138	-0.222762	0.849181	-0.207274	STYX	0.267985	0.163285	0.139715	0.804682	CENTER
BYST_97	sp|O54825|BYST_MOUSE	O54825	97	0.999	RERATRLGPGLPQDGSDEEDEEWPTLEKAAK	S	D	E	E	8	5	3	0.557721	0.386502	0.517428	0.311433	0.0569216	-0.422072	-0.46398	-0.388436	STYX	0.366001	0.00744822	-0.424829	0.121751	CENTER
BZW1_411	sp|Q9CQC6|BZW1_MOUSE	Q9CQC6	411	0.959	QMKKFVEWLKNAEEESESEAEEGD_______	S	E	S	E	5	2	3	0.164729	6.64	NA	NA	NA	0.307168	0.0507629	0.50578	STYX	3.40236	0.0690613	0.287904	0.298381	NR
C102A_12	sp|Q3TMW1|C102A_MOUSE	Q3TMW1	12	0.999	____MSHGPSPRLAESPQLSKSSLLTILGSP	S	P	Q	L	6	3	3	0.337406	-0.498397	NA	-0.0171247	NA	-0.448737	-1.0053	-0.246512	STYX	-0.0593717	0.67338	-0.566851	0.080691	CENTER
C170B_1032	sp|Q80U49|C170B_MOUSE	Q80U49	1032	1	TSRRAAMRRGHGSRGSLDWPEEERGSGLAHL	S	L	D	W	4	2	2	0.603021	-0.330628	NA	NA	NA	NA	0.128998	0.21992	STYX	0.136196	0.9951	0.174459	0.557747	CENTER
C170B_1075	sp|Q80U49|C170B_MOUSE	Q80U49	1075	1	AGRQGPRRKPAAPPPSPAAREEQSRSSATAQ	S	P	A	A	4	2	2	-0.700132	0.00619311	NA	NA	NA	-0.539354	-0.363162	NA	STYX	-0.34697	0.179132	-0.451258	0.187871	CENTER
C170B_1101	sp|Q80U49|C170B_MOUSE	Q80U49	1101	0.991	SATAQKVQQALTRSNSLSTPRPTRASRLRRA	S	L	S	T	8	5	3	-0.459994	0.0119692	-0.0564793	0.523617	-0.333868	-0.305916	0.190573	0.0928974	STYX	-0.0629511	0.253396	-0.0074821	0.990132	CENTER
C170B_1122	sp|Q80U49|C170B_MOUSE	Q80U49	1122	0.988	PTRASRLRRARLGDASDTEAVDGERGTAANP	S	D	T	E	8	5	3	-0.198593	-0.354866	0.0731258	0.121386	-0.156177	-0.782123	-1.10062	-0.37808	STYX	-0.103025	0.14002	-0.753607	0.0287725	CENTER
C170B_1347	sp|Q80U49|C170B_MOUSE	Q80U49	1347	0.987	VAGDGDSLGSPGPTRSPSLGNVPNTPASTIS	S	P	S	L	6	3	3	-0.489534	-0.0608902	0.138202	NA	NA	-0.34009	-0.592537	-0.252912	STYX	-0.137407	0.330192	-0.39518	0.157905	CENTER
C170B_1349	sp|Q80U49|C170B_MOUSE	Q80U49	1349	0.997	GDGDSLGSPGPTRSPSLGNVPNTPASTISAR	S	L	G	N	6	3	3	0.124143	-0.162139	0.460888	NA	NA	-0.512515	-0.587558	-0.86673	STYX	0.140964	0.620752	-0.655601	0.0357453	CENTER
C170B_360	sp|Q80U49|C170B_MOUSE	Q80U49	360	0.997	HTRTLKGHKHEDGTQSDSEDPLAKTASVSGA	S	D	S	E	8	5	3	-0.40285	0.210044	0.0445369	-0.109882	0.0135914	-0.769017	-0.259599	-0.63094	STYX	-0.0489117	0.454659	-0.553185	0.0705552	CENTER
C170B_362	sp|Q80U49|C170B_MOUSE	Q80U49	362	0.924	RTLKGHKHEDGTQSDSEDPLAKTASVSGASA	S	E	D	P	4	2	2	-0.578194	-0.0214186	NA	NA	NA	-0.756634	NA	-0.336336	STYX	-0.299806	0.136224	-0.546485	0.140142	CENTER
C170B_419	sp|Q80U49|C170B_MOUSE	Q80U49	419	0.971	FVIEFFDGDTPRKKRSQSFTHTPPADPKADK	S	Q	S	F	6	3	3	NA	-0.418746	0.251106	NA	-0.147617	-1.13218	-1.68238	0.0370986	STYQ	-0.105086	0.322351	-0.925821	0.062686	NR
C170B_421	sp|Q80U49|C170B_MOUSE	Q80U49	421	0.981	IEFFDGDTPRKKRSQSFTHTPPADPKADKRR	S	F	T	H	8	5	3	-0.25351	-0.553974	0.442469	0.225964	0.198711	-1.27178	-1.33196	-2.2504	STYX	0.0119319	0.880021	-1.61805	0.0035081	NR
C170B_423	sp|Q80U49|C170B_MOUSE	Q80U49	423	0.987	FFDGDTPRKKRSQSFTHTPPADPKADKRRGP	T	H	T	P	8	5	3	-0.307893	-0.454973	0.461613	0.2628	0.279836	-0.80759	-1.28498	-1.06473	STYX	0.0482766	0.767758	-1.05243	0.0073423	NR
C170B_477 478	sp|Q80U49|C170B_MOUSE	Q80U49	477 478	0.891	ASSLKREKTEERLGNTSPVPRASTRSFGSVG SSLKREKTEERLGNTSPVPRASTRSFGSVGR	T	S	P	V	8	5	3	-0.792545	-0.313202	0.1144	0.5007	0.404404	-0.949326	-1.01476	-0.600758	STYX	-0.0172484	0.913613	-0.854948	0.0146127	NR
C170B_490	sp|Q80U49|C170B_MOUSE	Q80U49	490	0.998	GNTSPVPRASTRSFGSVGRRSRLAQDFMAQC	S	V	G	R	8	5	3	-0.172097	-1.07287	0.0226759	0.344717	-0.473701	-1.38004	-1.4038	-1.52781	STYX	-0.270256	0.126637	-1.43722	0.00342622	NR
C170B_509 510	sp|Q80U49|C170B_MOUSE	Q80U49	509 510	0.887	RSRLAQDFMAQCMRDSSPATRPAPEKTPPVL SRLAQDFMAQCMRDSSPATRPAPEKTPPVLP	S	S	P	A	6	4	2	-0.684437	-0.0129579	-0.00744686	NA	0.148432	-0.684611	NA	-0.818278	STYX	-0.139102	0.429539	-0.751444	0.0574677	CENTER
C170B_539 540 541	sp|Q80U49|C170B_MOUSE	Q80U49	539 540 541	0.897	LPAPLTPRGASPVTPSTTPPPPTDPQLTKAR PAPLTPRGASPVTPSTTPPPPTDPQLTKARK APLTPRGASPVTPSTTPPPPTDPQLTKARKQ	S	T	T	P	8	5	3	0.109664	-0.00378138	-0.157128	-0.0683027	-0.0239875	-0.452822	-0.291746	-0.928412	STYX	-0.0287072	0.331521	-0.55766	0.0757374	CENTER
C170B_541	sp|Q80U49|C170B_MOUSE	Q80U49	541	0.997	APLTPRGASPVTPSTTPPPPTDPQLTKARKQ	T	P	P	P	8	5	3	0.173466	0.11164	-0.542485	-0.192462	-0.206384	0.0841327	-0.253754	-0.23148	STYX	-0.131245	0.177052	-0.1337	0.625668	CENTER
C170B_602 603	sp|Q80U49|C170B_MOUSE	Q80U49	602 603	0.888	DQVFGVFESPELSRVSSATFRPVIRGDKDES QVFGVFESPELSRVSSATFRPVIRGDKDESS	S	S	A	T	7	5	2	-0.22594	-0.328188	0.302738	0.296039	-0.130645	-1.10147	NA	-1.66369	STYX	-0.0171991	0.462696	-1.38258	0.0192281	NR
C170B_603	sp|Q80U49|C170B_MOUSE	Q80U49	603	0.992	QVFGVFESPELSRVSSATFRPVIRGDKDESS	S	A	T	F	5	2	3	0.0390767	-0.44908	NA	NA	NA	-1.71348	-1.13906	-0.449654	STYX	-0.205002	0.260115	-1.10073	0.0136617	NR
C170B_653	sp|Q80U49|C170B_MOUSE	Q80U49	653	0.999	GMAPQMEQQSLLVPGSPGGQKWVSRWASLAD	S	P	G	G	7	4	3	0.0675443	0.0912243	0.0796932	NA	-0.0339936	-0.415395	-0.789629	-0.417123	STYX	0.051117	0.771287	-0.540716	0.0693984	CENTER
C170B_709	sp|Q80U49|C170B_MOUSE	Q80U49	709	1	RTRRLLPQLPSGRADSPAGLEAARRNGPGPP	S	P	A	G	7	4	3	-0.290046	-0.230167	0.159004	0.0631025	NA	-0.813204	-0.457506	-0.965727	STYX	-0.0745265	0.334865	-0.745479	0.0249996	CENTER
C170B_818 819	sp|Q80U49|C170B_MOUSE	Q80U49	818 819	0.884	FVGPGEVDGPGRVVQTSPSARDGLYVSSNGR VGPGEVDGPGRVVQTSPSARDGLYVSSNGRM	T	S	P	S	7	5	2	-0.193815	-0.163756	0.112529	0.0454823	-0.441434	NA	-0.518947	0.116824	STYX	-0.128199	0.105638	-0.201061	0.593716	CENTER
C170B_819	sp|Q80U49|C170B_MOUSE	Q80U49	819	0.948	VGPGEVDGPGRVVQTSPSARDGLYVSSNGRM	S	P	S	A	5	2	3	0.0816693	-0.0615447	NA	NA	NA	-0.812476	-0.861308	-0.489546	STYX	0.0100623	0.806654	-0.72111	0.0258156	CENTER
C170B_843	sp|Q80U49|C170B_MOUSE	Q80U49	843	0.997	VSSNGRMVIQLRSGRSPEPDPAPPKETLTFA	S	P	E	P	8	5	3	-0.645386	-0.328804	0.618436	0.591225	0.295014	-0.836661	-1.44818	-1.32862	STYX	0.106097	0.617549	-1.20449	0.00568047	NR
C170B_882	sp|Q80U49|C170B_MOUSE	Q80U49	882	0.989	PTSGPPAPGKLPHISSHPLLQDLAAARASRL	S	H	P	L	4	2	2	0.56402	-0.554992	NA	NA	NA	NA	-0.262676	-0.303587	STYX	0.00451405	0.925564	-0.283131	0.384125	CENTER
C19L2_554 555	sp|Q8BG79|C19L2_MOUSE	Q8BG79	554 555	0.869	VILIQTDKSGRMWPVSSPRETLDMKAERRKR ILIQTDKSGRMWPVSSPRETLDMKAERRKRK	S	S	P	R	6	3	3	1.36499	-0.622828	NA	0.0688054	NA	0.202148	0.411535	0.386716	STYX	0.270322	0.868685	0.333466	0.21858	CENTER
C295L_345	sp|Q497N6|C295L_MOUSE	Q497N6	345	0.995	ETTEMWSKVNLKQILSDSEYPRYQQIAKYPL	S	D	S	E	7	4	3	0.463957	-0.710888	-0.00506444	NA	-0.379894	1.26719	1.3548	1.83334	STYX	-0.157972	0.288196	1.48511	0.00428929	NR
C295L_364	sp|Q497N6|C295L_MOUSE	Q497N6	364	0.998	YPRYQQIAKYPLKSESLVPVKAGTSREQDDL	S	L	V	P	5	2	3	0.772092	-0.69143	NA	NA	NA	1.48154	0.190116	1.5725	STYX	0.0403314	0.961143	1.08138	0.0283069	NR
C295L_414	sp|Q497N6|C295L_MOUSE	Q497N6	414	0.999	ESLKPYLQKQADSVASWMALRQKQKAELEQR	S	W	M	A	7	4	3	0.452715	-0.494772	NA	0.0579771	-0.476069	1.59288	1.3661	1.41232	STYX	-0.115037	0.407694	1.4571	0.00404648	NR
C2C2L_662	sp|Q80X80|C2C2L_MOUSE	Q80X80	662	0.996	IFRRRPRQKEAGLSQSHDDLSNTTATPSVRK	S	H	D	D	6	3	3	-0.528574	-0.0213393	NA	NA	0.0410834	-0.5731	-0.346304	-0.475498	STYX	-0.16961	0.246329	-0.464967	0.0988295	CENTER
C2C4C_153	sp|Q5HZI2|C2C4C_MOUSE	Q5HZI2	153	0.998	VPKAQTSYGFATLAESPHTRRKESLFHSEHG	S	P	H	T	8	5	3	0.158321	-0.112019	-0.0511301	-0.237821	-0.352436	-0.528215	-0.526728	-0.693357	STYX	-0.119017	0.0774303	-0.582766	0.0495186	CENTER
C2C4C_226	sp|Q5HZI2|C2C4C_MOUSE	Q5HZI2	226	0.997	GESDTGSSAESSPFGSPLLSRSVSLLKGFAQ	S	P	L	L	4	2	2	NA	0.211182	NA	NA	-0.167293	-0.190286	NA	0.22038	STYX	0.0219448	0.854151	0.0150472	0.94875	CENTER
C2C4C_282	sp|Q5HZI2|C2C4C_MOUSE	Q5HZI2	282	0.998	PDTSPGVRRRLSRRATPEPGPESGQAPRGEH	T	P	E	P	8	5	3	-0.827983	-0.629816	0.417822	0.174853	0.325477	-0.695704	-0.29221	-0.668188	STYX	-0.107929	0.92504	-0.552034	0.0668524	CENTER
C2C4C_77	sp|Q5HZI2|C2C4C_MOUSE	Q5HZI2	77	1	GQADLGPSTSEQNLASPGPRRAPRSPRLPAK	S	P	G	P	5	2	3	NA	0.134383	-0.263629	NA	NA	0.0166339	0.00467016	0.785666	STYX	-0.0646232	0.562599	0.26899	0.41721	CENTER
C2CD3_453	sp|Q52KB6|C2CD3_MOUSE	Q52KB6	453	0.999	FYTVPKSDVGTSELPSEDDGVEPSRTMNQSK	S	E	D	D	6	4	2	0.373036	0.118653	-0.0597526	0.138134	NA	NA	0.116807	0.420192	STYX	0.142518	0.321633	0.2685	0.414341	CENTER
C2CD5_259 260	sp|Q7TPS5|C2CD5_MOUSE	Q7TPS5	259 260	0.874	TLDKLSSPAAFLPACSSPSRELKEIPFNEDP LDKLSSPAAFLPACSSPSRELKEIPFNEDPN	S	S	P	S	8	5	3	0.153087	0.0540642	0.0863726	-0.085034	-0.233511	-0.00216272	-0.212381	0.122553	STYX	-0.00500426	0.664755	-0.0306634	0.931328	CENTER
C2CD5_260	sp|Q7TPS5|C2CD5_MOUSE	Q7TPS5	260	0.982	LDKLSSPAAFLPACSSPSRELKEIPFNEDPN	S	P	S	R	6	3	3	0.434038	0.00498413	0.607122	NA	NA	0.451357	0.439403	0.423606	STYX	0.348715	0.100868	0.438122	0.122267	CENTER
C2CD5_280 281	sp|Q7TPS5|C2CD5_MOUSE	Q7TPS5	280 281	0.896	LKEIPFNEDPNPNTHSSGPSTPLKNQTYSFS KEIPFNEDPNPNTHSSGPSTPLKNQTYSFSP	S	S	G	P	7	4	3	0.557115	0.340394	0.446965	NA	0.326694	0.122121	0.737775	0.276593	STYX	0.417792	0.0046032	0.37883	0.205318	CENTER
C2CD5_281	sp|Q7TPS5|C2CD5_MOUSE	Q7TPS5	281	0.99	KEIPFNEDPNPNTHSSGPSTPLKNQTYSFSP	S	G	P	S	5	3	2	0.641459	0.0648801	0.340216	NA	NA	0.490158	0.0614067	NA	STYX	0.348852	0.0657262	0.275782	0.422062	CENTER
C2CD5_295	sp|Q7TPS5|C2CD5_MOUSE	Q7TPS5	295	0.998	SSGPSTPLKNQTYSFSPSKSYSRQSSSSDTD	S	P	S	K	8	5	3	0.914435	0.0975641	-0.0160007	-0.369779	-0.0463614	0.506168	0.55924	0.43342	STYX	0.115972	0.842023	0.499609	0.0898829	CENTER
C2CD5_304 305 306 307	sp|Q7TPS5|C2CD5_MOUSE	Q7TPS5	304 305 306 307	0.893	NQTYSFSPSKSYSRQSSSSDTDLSLTPKTGM QTYSFSPSKSYSRQSSSSDTDLSLTPKTGMG TYSFSPSKSYSRQSSSSDTDLSLTPKTGMGS YSFSPSKSYSRQSSSSDTDLSLTPKTGMGSG	S	S	S	S	8	5	3	0.204816	-0.165618	-0.0184404	-0.0048429	0.0977426	-0.602009	0.80197	-1.01649	STYX	0.0227314	0.834739	-0.272176	0.424695	CENTER
C2CD5_304 305 306 307 314	sp|Q7TPS5|C2CD5_MOUSE	Q7TPS5	304 305 306 307 314	0.862	NQTYSFSPSKSYSRQSSSSDTDLSLTPKTGM QTYSFSPSKSYSRQSSSSDTDLSLTPKTGMG TYSFSPSKSYSRQSSSSDTDLSLTPKTGMGS YSFSPSKSYSRQSSSSDTDLSLTPKTGMGSG SYSRQSSSSDTDLSLTPKTGMGSGSAGKEGG	S	S	S	S	4	2	2	0.110351	0.361521	NA	NA	NA	NA	-0.401025	0.0268852	STYX	0.235936	0.174669	-0.18707	0.586145	CENTER
C2CD5_307	sp|Q7TPS5|C2CD5_MOUSE	Q7TPS5	307	0.992	YSFSPSKSYSRQSSSSDTDLSLTPKTGMGSG	S	D	T	D	8	5	3	0.443072	0.115453	-0.0813978	-0.0702575	0.274075	0.280401	0.790167	0.228523	STYX	0.136189	0.471258	0.43303	0.152927	CENTER
C2CD5_314	sp|Q7TPS5|C2CD5_MOUSE	Q7TPS5	314	0.999	SYSRQSSSSDTDLSLTPKTGMGSGSAGKEGG	T	P	K	T	7	4	3	0.158516	0.0966737	0.539135	0.139166	NA	0.182926	-0.239398	0.130144	STYX	0.233373	0.0764717	0.0245573	0.892206	CENTER
C2CD5_323	sp|Q7TPS5|C2CD5_MOUSE	Q7TPS5	323	0.999	DTDLSLTPKTGMGSGSAGKEGGPFKALLRQQ	S	A	G	K	8	5	3	-0.268615	0.535574	0.237892	0.354791	0.359531	1.6603	1.5787	1.0795	STYX	0.243835	0.0841565	1.4395	0.00463552	NR
C2CD5_339	sp|Q7TPS5|C2CD5_MOUSE	Q7TPS5	339	0.992	AGKEGGPFKALLRQQTQSALEQREFPFLTLT	T	Q	S	A	4	2	2	NA	-0.339104	0.110887	NA	NA	0.27345	NA	-0.541662	STYQ	-0.114109	0.46181	-0.134106	0.738877	CENTER
C2CD5_643	sp|Q7TPS5|C2CD5_MOUSE	Q7TPS5	643	1	LYEITPPEVSEEMIGSPIPEPRQRSRLLRSQ	S	P	I	P	8	5	3	0.589024	0.158315	0.308619	0.284884	-0.162452	0.183428	-0.203855	0.425275	STYX	0.235678	0.104837	0.13495	0.619148	CENTER
C2CD5_659	sp|Q7TPS5|C2CD5_MOUSE	Q7TPS5	659	0.997	PIPEPRQRSRLLRSQSESSDEVTELDLSHGK	S	E	S	S	8	5	3	0.461323	-0.274171	0.125353	0.051376	-0.0548737	0.217298	-0.242378	0.150952	STYX	0.0618014	0.963614	0.0419574	0.842662	CENTER
C2D1A_312	sp|Q8K1A6|C2D1A_MOUSE	Q8K1A6	312	0.999	ELVDLSRLPPPPDQLSPEPPLPAAQPLTSAS	S	P	E	P	5	2	3	0.121384	0.0331769	NA	NA	NA	0.0848419	0.181512	0.158061	STYX	0.0772805	0.65004	0.141472	0.548676	CENTER
C2D1A_435	sp|Q8K1A6|C2D1A_MOUSE	Q8K1A6	435	0.999	GVLETAMRLANHDEGSDDEEEETPKKQNTPA	S	D	D	E	8	5	3	-0.160795	1.52399	-0.0232712	0.023099	0.0742624	-0.511341	-0.479225	-0.135011	STYX	0.287458	0.897696	-0.375192	0.182225	CENTER
C2D1A_459	sp|Q8K1A6|C2D1A_MOUSE	Q8K1A6	459	0.983	KKQNTPAASTTQLKSSPSKAPPSGPAPAGKA	S	P	S	K	5	2	3	0.0896837	0.489425	NA	NA	NA	0.0468148	0.119878	-0.278285	STYX	0.289554	0.168764	-0.0371973	0.916991	CENTER
C2D1B_455	sp|Q8BRN9|C2D1B_MOUSE	Q8BRN9	455	0.998	PPGFPPIPGLEPRKGSEQDSVAATLATAQKL	S	E	Q	D	6	3	3	NA	0.567004	-0.0935438	NA	-0.0874528	-1.26496	-0.862277	-1.27504	STYX	0.128669	0.872053	-1.1341	0.00596865	NR
C2D1B_484	sp|Q8BRN9|C2D1B_MOUSE	Q8BRN9	484	0.997	KLASEDAALVDDDEESDTPAQAPLAKKPAQT	S	D	T	P	4	2	2	0.389705	-0.0927509	NA	NA	NA	NA	-0.526802	-0.233553	STYX	0.148477	0.73826	-0.380177	0.266616	CENTER
C2D1B_502	sp|Q8BRN9|C2D1B_MOUSE	Q8BRN9	502	0.996	PAQAPLAKKPAQTLVSPSHLLTEPKASSSKE	S	P	S	H	4	2	2	NA	-0.130041	-0.174065	NA	NA	NA	-0.121662	0.199878	STYX	-0.152053	0.0851489	0.0391082	0.880565	CENTER
C2D1B_513 514 515	sp|Q8BRN9|C2D1B_MOUSE	Q8BRN9	513 514 515	0.886	QTLVSPSHLLTEPKASSSKESLSPSVREQVT TLVSPSHLLTEPKASSSKESLSPSVREQVTL LVSPSHLLTEPKASSSKESLSPSVREQVTLL	S	S	S	K	8	5	3	-0.307391	-0.499947	-0.133928	-0.039163	-0.0612685	0.801282	0.440276	0.00984599	STYX	-0.208339	0.0113866	0.417135	0.190376	CENTER
C2D1B_515	sp|Q8BRN9|C2D1B_MOUSE	Q8BRN9	515	0.988	LVSPSHLLTEPKASSSKESLSPSVREQVTLL	S	K	E	S	5	3	2	-0.227274	0.680867	NA	NA	0.225256	0.363795	NA	-0.0433843	STYX	0.226283	0.473782	0.160205	0.627222	CENTER
C2D1B_520	sp|Q8BRN9|C2D1B_MOUSE	Q8BRN9	520	0.996	HLLTEPKASSSKESLSPSVREQVTLLEARKL	S	P	S	V	6	3	3	NA	-0.174892	0.121729	0.262253	NA	0.382127	0.488237	-0.071508	STYX	0.0696964	0.77626	0.266285	0.347887	CENTER
C43BP_373	sp|Q9EQG9|C43BP_MOUSE	Q9EQG9	373	0.996	TFSSVGTHRFVQKPYSRSSSMSSIDLVSASD	S	R	S	S	5	2	3	NA	-0.549816	-0.491968	NA	NA	-0.212947	-0.591258	-0.546085	STYX	-0.520892	0.0172257	-0.450097	0.117807	CENTER
C43BP_375 376 377	sp|Q9EQG9|C43BP_MOUSE	Q9EQG9	375 376 377	0.882	SSVGTHRFVQKPYSRSSSMSSIDLVSASDDV SVGTHRFVQKPYSRSSSMSSIDLVSASDDVH VGTHRFVQKPYSRSSSMSSIDLVSASDDVHR	S	S	S	M	7	5	2	-0.257855	-0.15128	-0.0477689	-0.0310292	0.0955317	-0.0589209	-0.128525	NA	STYX	-0.0784802	0.132211	-0.0937227	0.781021	CENTER
C43BP_377	sp|Q9EQG9|C43BP_MOUSE	Q9EQG9	377	0.98	VGTHRFVQKPYSRSSSMSSIDLVSASDDVHR	S	M	S	S	5	2	3	0.473637	0.284499	NA	NA	NA	-0.156873	-0.392438	-0.228235	STYX	0.379068	0.05338	-0.259182	0.33339	CENTER
C43BP_380	sp|Q9EQG9|C43BP_MOUSE	Q9EQG9	380	0.998	HRFVQKPYSRSSSMSSIDLVSASDDVHRFSS	S	I	D	L	6	4	2	0.18106	0.154552	0.118622	NA	-0.0642618	NA	0.654171	-0.0257337	STYX	0.0974929	0.435378	0.314219	0.419793	CENTER
C8AP2_1516	sp|Q9WUF3|C8AP2_MOUSE	Q9WUF3	1516	1	QYHPNLPMHAVIMEKSNDHFIVKIRRATPST	S	N	D	H	5	2	3	0.463301	-0.0704215	NA	NA	NA	0.0539584	0.387402	0.546193	STYX	0.196439	0.619232	0.329185	0.248296	CENTER
C8AP2_1844	sp|Q9WUF3|C8AP2_MOUSE	Q9WUF3	1844	0.997	QRKDIDLSSEKTQRLSPNSDRNGDAHRKQAS	S	P	N	S	7	4	3	0.418528	-0.0750572	-0.132749	NA	-0.137116	0.526056	0.710237	0.417589	STYX	0.0184016	0.399675	0.551294	0.0710767	CENTER
C8AP2_560	sp|Q9WUF3|C8AP2_MOUSE	Q9WUF3	560	0.999	KDLKLSFMEKLNLTLSPAKKQPACQDNPHQI	S	P	A	K	7	4	3	1.19385	-0.228016	NA	-0.177503	-0.955607	0.376928	0.111096	0.0190299	STYX	-0.0418188	0.162254	0.169018	0.51335	CENTER
C8AP2_798	sp|Q9WUF3|C8AP2_MOUSE	Q9WUF3	798	0.998	SCPLESCLPKETFVPSPQKTELIDHKIETGE	S	P	Q	K	5	2	3	NA	0.0729468	-0.196189	NA	NA	-0.105551	-0.279608	0.110151	STYX	-0.0616209	0.45506	-0.0916689	0.748642	CENTER
CA021_115	sp|Q8K207|CA021_MOUSE	Q8K207	115	0.997	FRMLDEKIEKGRDYCSEEEDIT_________	S	E	E	E	8	5	3	0.282074	-0.0212259	0.349332	0.133915	0.165354	0.036089	-0.538044	-0.148996	STYX	0.18189	0.0987501	-0.216984	0.453315	CENTER
CA021_95	sp|Q8K207|CA021_MOUSE	Q8K207	95	0.998	PGLVHQPRANMHISESQQEFFRMLDEKIEKG	S	Q	Q	E	8	5	3	-0.00328597	-0.00546358	0.0312267	0.00391511	0.00755184	-0.067648	-0.783746	-0.58055	STYQ	0.00678882	0.678653	-0.477314	0.125665	CENTER
CA043_211	sp|Q8R092|CA043_MOUSE	Q8R092	211	0.998	SSQRQHQSAAKDLTQSPEMSPTTIQVTYLPS	S	P	E	M	7	5	2	0.471262	-0.0644464	0.353	0.598673	-0.0200627	0.125332	0.138116	NA	STYX	0.267685	0.141781	0.131724	0.646272	CENTER
CA052_156	sp|Q9CWU4|CA052_MOUSE	Q9CWU4	156	0.998	AKKARLLPEGEETVESDDDKDERASKIRRVE	S	D	D	D	8	5	3	0.0807228	-0.287367	0.118404	0.362213	-0.525512	-0.466802	-0.429663	-0.69162	STYX	-0.0503079	0.693349	-0.529362	0.0688258	CENTER
CA112_31	sp|Q3TQQ9|CA112_MOUSE	Q3TQQ9	31	1	ELSSWSEEMCRRELPSVLPRLLSMYQCSESW	S	V	L	P	7	4	3	0.403485	-0.453262	NA	0.203475	-0.535028	0.838373	1.08956	1.62011	STYX	-0.0953326	0.640471	1.18268	0.00791591	NR
CA131_67	sp|Q8CIL4|CA131_MOUSE	Q8CIL4	67	0.999	ETIEDVAVEPLPLPGSPVRGQKKSASSFFQK	S	P	V	R	8	5	3	0.536528	0.239201	0.157862	0.182858	-0.00282746	-0.204927	-0.264961	-0.58995	STYX	0.222724	0.0651703	-0.353279	0.208396	CENTER
CA174_118 119	sp|Q80WR5|CA174_MOUSE	Q80WR5	118 119	0.893	AAVSVPESREPPQGCSTPASEEPSVKAENGL AVSVPESREPPQGCSTPASEEPSVKAENGLS	S	T	P	A	5	2	3	-0.131176	0.0141085	NA	NA	NA	0.44098	-0.0537525	0.0359488	STYX	-0.0585336	0.37155	0.141059	0.606757	CENTER
CA174_208	sp|Q80WR5|CA174_MOUSE	Q80WR5	208	0.97	VELMQDLPPASSSYPSMSRREFRKMHFRAKD	S	M	S	R	4	2	2	0.71819	0.249922	NA	NA	NA	NA	-0.0913639	0.420657	STYX	0.484056	0.0500914	0.164646	0.631525	CENTER
CA194_48 49 50	sp|Q9DAD0|CA194_MOUSE	Q9DAD0	48 49 50	0.89	NPAHLAQQQDPWSRLSSTPTATSRSRDTFFD PAHLAQQQDPWSRLSSTPTATSRSRDTFFDS AHLAQQQDPWSRLSSTPTATSRSRDTFFDSK	S	S	T	P	7	5	2	-0.265643	-0.822197	0.855074	-0.0668503	0.147821	1.24716	1.16938	NA	STYX	-0.030359	0.480422	1.20827	0.0245514	NR
CA194_50	sp|Q9DAD0|CA194_MOUSE	Q9DAD0	50	0.988	AHLAQQQDPWSRLSSTPTATSRSRDTFFDSK	T	P	T	A	7	5	2	0.258436	-1.02038	1.21226	0.135937	0.0626546	1.28272	1.45748	NA	STYX	0.129783	0.352241	1.3701	0.0205124	NR
CA198_176	sp|Q8C3W1|CA198_MOUSE	Q8C3W1	176	0.97	QGTQGSKPAQSSRSSSLDALGPARKEEEAPF	S	L	D	A	5	3	2	NA	-0.631699	0.205348	0.171705	NA	NA	-0.315028	-0.728262	STYX	-0.084882	0.922722	-0.521645	0.155205	CENTER
CAAP1_306 307	sp|Q8VDY9|CAAP1_MOUSE	Q8VDY9	306 307	0.897	RDIEKSVNEILGLAESSPKEPKVATLTVPPA DIEKSVNEILGLAESSPKEPKVATLTVPPAE	S	S	P	K	7	4	3	NA	0.527876	0.00876616	-0.244244	-0.485852	-0.557195	-0.671625	-0.80995	STYX	-0.0483634	0.373702	-0.67959	0.0297639	CENTER
CAAP1_307	sp|Q8VDY9|CAAP1_MOUSE	Q8VDY9	307	0.987	DIEKSVNEILGLAESSPKEPKVATLTVPPAE	S	P	K	E	5	2	3	NA	0.399557	-0.0838265	NA	NA	-0.59293	-0.531393	-0.117077	STYX	0.157865	0.701263	-0.4138	0.154237	CENTER
CAAP1_68	sp|Q8VDY9|CAAP1_MOUSE	Q8VDY9	68	0.96	SVAGGAERSERRKRRSTDSSSSVSGSLQQET	S	T	D	S	4	2	2	NA	0.132034	-0.0319658	NA	NA	-0.382113	NA	0.302232	STYX	0.0500343	0.897127	-0.0399402	0.912046	CENTER
CAAP1_89	sp|Q8VDY9|CAAP1_MOUSE	Q8VDY9	89	0.999	SVSGSLQQETKYLLPSLEKELFLAEHSDLEE	S	L	E	K	5	2	3	0.895186	-0.737284	NA	NA	NA	0.127111	-0.0799791	0.193161	STYX	0.078951	0.971325	0.0800976	0.723947	CENTER
CABL2_103	sp|Q8K3M5|CABL2_MOUSE	Q8K3M5	103	0.997	GLPGLPARPAPQGLLSPTTAPAGLGLDGQRQ	S	P	T	T	4	2	2	0.107611	-0.330307	NA	NA	NA	0.120184	NA	0.205936	STYX	-0.111348	0.457634	0.16306	0.579403	CENTER
CABS1_108	sp|Q8C633|CABS1_MOUSE	Q8C633	108	0.998	EITTPTETPNSKPKGSITENFIPVKIGNTSS	S	I	T	E	6	3	3	0.251822	-0.362338	NA	-0.266547	NA	1.08911	0.465132	1.16434	STYX	-0.125688	0.254039	0.906192	0.0194456	NR
CABS1_121 122 123	sp|Q8C633|CABS1_MOUSE	Q8C633	121 122 123	0.896	KGSITENFIPVKIGNTSSPVGTVSLIDFSSN GSITENFIPVKIGNTSSPVGTVSLIDFSSNT SITENFIPVKIGNTSSPVGTVSLIDFSSNTA	T	S	S	P	6	3	3	-0.0588348	0.235555	0.254465	NA	NA	2.13201	0.142058	1.36876	STYX	0.143729	0.369588	1.21427	0.0327628	NR
CABS1_123	sp|Q8C633|CABS1_MOUSE	Q8C633	123	0.997	SITENFIPVKIGNTSSPVGTVSLIDFSSNTA	S	P	V	G	7	4	3	0.0370221	-0.0403851	0.197653	0.0137589	NA	1.42709	1.19821	1.40598	STYX	0.0520121	0.863068	1.34376	0.00470773	NR
CABS1_18	sp|Q8C633|CABS1_MOUSE	Q8C633	18	0.995	EDGSPKIYSRPPRDNSKTPTEADIFFGADNT	S	K	T	P	7	4	3	-0.304548	0.424557	0.097304	NA	-0.310671	0.793876	0.829253	1.2859	STYX	-0.0233396	0.548373	0.969676	0.0127561	NR
CABS1_20	sp|Q8C633|CABS1_MOUSE	Q8C633	20	0.993	GSPKIYSRPPRDNSKTPTEADIFFGADNTIP	T	P	T	E	8	5	3	0.211551	0.417658	0.418303	-0.177723	-0.793073	1.19817	0.704128	1.27536	STYX	0.0153433	0.694496	1.05922	0.0103619	NR
CABS1_242	sp|Q8C633|CABS1_MOUSE	Q8C633	242	1	TNIAEENVTEIKLIVSEDRPKTVTKLSDSEE	S	E	D	R	8	5	3	0.142152	-0.830592	-0.456156	0.00187767	0.131799	1.29908	1.18941	1.38448	STYX	-0.202184	0.325982	1.29099	0.00513295	NR
CABS1_253	sp|Q8C633|CABS1_MOUSE	Q8C633	253	0.997	KLIVSEDRPKTVTKLSDSEEEKFITVFELTN	S	D	S	E	8	5	3	0.218499	-0.345742	0.0559303	-0.147598	-0.0720377	1.20704	1.32748	2.11747	STYX	-0.0581898	0.289091	1.55066	0.00443417	NR
CABS1_255	sp|Q8C633|CABS1_MOUSE	Q8C633	255	0.997	IVSEDRPKTVTKLSDSEEEKFITVFELTNSA	S	E	E	E	7	4	3	0.220317	-0.00919153	-0.128389	-0.322119	NA	1.20179	0.926314	1.5673	STYX	-0.0598458	0.327662	1.2318	0.00659816	NR
CABS1_286	sp|Q8C633|CABS1_MOUSE	Q8C633	286	0.974	EKAKDNVEDPLNDEESTDGANDWMEKETASE	S	T	D	G	5	2	3	0.281183	-0.251506	NA	NA	NA	0.983347	0.896384	2.19025	STYX	0.0148389	0.851583	1.35666	0.00780365	NR
CABS1_286 287	sp|Q8C633|CABS1_MOUSE	Q8C633	286 287	0.896	EKAKDNVEDPLNDEESTDGANDWMEKETASE KAKDNVEDPLNDEESTDGANDWMEKETASEA	S	T	D	G	5	2	3	0.273109	0.00190319	NA	NA	NA	0.837886	0.929742	1.50548	STYX	0.137506	0.487305	1.09104	0.00960919	NR
CABS1_376	sp|Q8C633|CABS1_MOUSE	Q8C633	376	0.999	IVDTLKDKEDLSTTNSGLFKLLKEEPDDLMM	S	G	L	F	8	5	3	0.159825	-0.22333	-0.164094	-0.0650387	-0.217193	1.34132	1.22352	2.18797	STYX	-0.101966	0.0687497	1.58427	0.00434197	NR
CABS1_95 96	sp|Q8C633|CABS1_MOUSE	Q8C633	95 96	0.895	IEGCLKLTTLPEKEITTPTETPNSKPKGSIT EGCLKLTTLPEKEITTPTETPNSKPKGSITE	T	T	P	T	6	3	3	-0.241943	NA	-0.138814	NA	-0.378052	1.30978	0.974139	1.58706	STYX	-0.252937	0.0136515	1.29033	0.00582176	NR
CABS1_96	sp|Q8C633|CABS1_MOUSE	Q8C633	96	0.993	EGCLKLTTLPEKEITTPTETPNSKPKGSITE	T	P	T	E	7	4	3	-0.0299847	-0.394541	-0.264073	-0.0554258	NA	0.953783	0.743641	1.34953	STYX	-0.186006	0.0314138	1.01565	0.0115389	NR
CABYR_124	sp|Q9D424|CABYR_MOUSE	Q9D424	124	0.999	NVAGPLFSNKTTQFPSVHAEVQSEETSEGAR	S	V	H	A	8	5	3	-0.131672	0.115532	0.481943	0.02007	-0.11974	0.774237	0.199295	0.296013	STYX	0.0732265	0.923806	0.423181	0.160479	CENTER
CABYR_238 239	sp|Q9D424|CABYR_MOUSE	Q9D424	238 239	0.886	LVCSGETVEVQVVSKTSAQVVVGPVSEAEPP VCSGETVEVQVVSKTSAQVVVGPVSEAEPPK	T	S	A	Q	7	4	3	0.15367	-0.202587	-0.112406	NA	-0.308843	0.901756	0.988564	2.05738	STYX	-0.117542	0.107903	1.3159	0.00776038	NR
CABYR_239	sp|Q9D424|CABYR_MOUSE	Q9D424	239	0.987	VCSGETVEVQVVSKTSAQVVVGPVSEAEPPK	S	A	Q	V	5	2	3	0.139055	-0.229379	NA	NA	NA	1.06931	0.409683	1.08343	STYX	-0.0451618	0.602016	0.85414	0.02408	NR
CABYR_324	sp|Q9D424|CABYR_MOUSE	Q9D424	324	0.999	FTDHDQVACVKEIEQSPPGSPKAVEPKTKIS	S	P	P	G	8	5	3	-0.212279	-0.506424	-0.128627	-0.105039	-0.0983619	1.30387	1.22254	0.978352	STYX	-0.210146	0.00554991	1.16825	0.00679805	NR
CABYR_339	sp|Q9D424|CABYR_MOUSE	Q9D424	339	0.998	SPPGSPKAVEPKTKISIESLKTVQVEENSQH	S	I	E	S	8	5	3	-0.187104	-0.405354	0.01819	0.0742974	0.132187	1.67956	1.23556	0.957796	STYX	-0.0735568	0.351973	1.29097	0.00612635	NR
CAC1H_1203	sp|O88427|CAC1H_MOUSE	O88427	1203	1	GASPGPRATPLRRAESLGHRSTMDLCPPRPA	S	L	G	H	7	4	3	-0.745853	-0.586738	1.55824	0.540906	NA	1.0657	0.521905	0.304146	STYX	0.191639	0.938393	0.630585	0.0645577	CENTER
CAC1H_1988 1989	sp|O88427|CAC1H_MOUSE	O88427	1988 1989	0.868	PSLEPRTSFQVPSAASSPARVSDPLCALSPR SLEPRTSFQVPSAASSPARVSDPLCALSPRD	S	S	P	A	8	5	3	0.396522	0.140791	0.000185895	0.155278	-0.0856958	-0.26353	-0.0774079	0.160276	STYX	0.121416	0.417991	-0.0602207	0.843499	CENTER
CAC1H_2201	sp|O88427|CAC1H_MOUSE	O88427	2201	0.998	SELEPALGARRKKKMSPPCISIDPPTEDEGS	S	P	P	C	8	5	3	-0.427235	0.138273	0.0651823	0.306252	0.0399657	0.318345	0.523437	0.105929	STYX	0.0244876	0.763332	0.315904	0.255098	CENTER
CAC1H_32	sp|O88427|CAC1H_MOUSE	O88427	32	0.997	ASPSAPAAPVRASPASPGVPGREEQRGSGSS	S	P	G	V	5	2	3	-0.143461	0.42592	NA	NA	NA	0.261738	0.515852	0.192435	STYX	0.14123	0.855179	0.323342	0.238039	CENTER
CAC1H_541	sp|O88427|CAC1H_MOUSE	O88427	541	0.998	HHHHYHFSHGGPRRPSPEPGAGDTRLVRACV	S	P	E	P	8	5	3	0.233929	-0.129543	0.158234	-0.16207	0.283834	0.843117	1.13116	0.852445	STYX	0.0768768	0.740068	0.94224	0.0127369	NR
CACB1_205	sp|Q8R3Z5|CACB1_MOUSE	Q8R3Z5	205	0.999	SSSSLGDVVTGTRRPTPPASAKQKQKSTEHV	T	P	P	A	6	4	2	NA	-0.315046	0.122199	0.477273	-0.266526	0.690229	NA	0.842243	STYX	0.00447502	0.632951	0.766236	0.0661352	CENTER
CACL1_366	sp|Q8R0X2|CACL1_MOUSE	Q8R0X2	366	0.998	GDQSRKRAGDELAYNSPSACASSRGYR____	S	P	S	A	7	5	2	-0.157519	0.172799	-0.030914	-0.0532779	0.219166	0.140067	NA	-0.0358599	STYX	0.030051	0.831264	0.0521034	0.845552	CENTER
CACO1_208	sp|Q8CGU1|CACO1_MOUSE	Q8CGU1	208	0.999	QEHSELTEQYKGLSRSHGELSEERDILSQQQ	S	H	G	E	5	2	3	-0.257738	0.0336238	NA	NA	NA	0.0608438	-0.039924	0.472822	STYX	-0.112057	0.297741	0.16458	0.55037	CENTER
CACO1_560 561 562 563	sp|Q8CGU1|CACO1_MOUSE	Q8CGU1	560 561 562 563	0.897	EDMRLPSYGLCESGNTSSSPPGPREPSSLVV DMRLPSYGLCESGNTSSSPPGPREPSSLVVI MRLPSYGLCESGNTSSSPPGPREPSSLVVIN RLPSYGLCESGNTSSSPPGPREPSSLVVINQ	T	S	S	S	6	3	3	0.258003	0.00859173	0.18257	NA	NA	0.192779	0.0162557	0.592614	STYX	0.149722	0.270773	0.267216	0.349813	CENTER
CACO1_563	sp|Q8CGU1|CACO1_MOUSE	Q8CGU1	563	0.994	RLPSYGLCESGNTSSSPPGPREPSSLVVINQ	S	P	P	G	5	2	3	-0.0898777	-0.135582	NA	NA	NA	-0.0320323	0.0576953	0.464298	STYX	-0.11273	0.142579	0.16332	0.55162	CENTER
CAD23_3260	sp|Q99PF4|CAD23_MOUSE	Q99PF4	3260	0.998	SELIHTDLEEEPGDHSPGQGSLRFRHKPPME	S	P	G	Q	5	2	3	-0.0243504	NA	0.171825	NA	NA	-0.536622	-0.309707	-0.448451	STYX	0.0737375	0.756496	-0.431593	0.121204	CENTER
CADM1_436	sp|Q8R5M8|CADM1_MOUSE	Q8R5M8	436	0.999	FTHEAKGADDAADADTAIINAEGGQNNSEEK	T	A	I	I	4	2	2	-0.212131	-0.320291	NA	NA	NA	-0.157026	-0.704141	NA	STYX	-0.266211	0.0341169	-0.430583	0.24778	CENTER
CADM1_448	sp|Q8R5M8|CADM1_MOUSE	Q8R5M8	448	0.999	DADTAIINAEGGQNNSEEKKEYFI_______	S	E	E	K	8	5	3	-0.00188572	-0.0443245	0.652066	-0.417044	-0.168239	0.335886	0.346244	0.0601693	STYX	0.0041144	0.330902	0.247433	0.34679	CENTER
CADM4_83	sp|Q8R464|CADM4_MOUSE,sp|Q9EPQ8|TCF20_MOUSE	Q8R464	83	1	GTRALKDERFQLEEFSPRRVRIRLSDARLED	S	P	R	R	6	3	3	NA	-0.422431	NA	0.448003	-0.92346	0.875986	0.30376	0.159708	STYX	-0.299296	0.273458	0.446485	0.156688	CENTER
CAF1A_293 294	sp|Q9QWF0|CAF1A_MOUSE	Q9QWF0	293 294	0.892	SPEGPSTPPEHRGGRSSPSTPACRVAKNFVK PEGPSTPPEHRGGRSSPSTPACRVAKNFVKG	S	S	P	S	7	5	2	0.527791	-0.409295	-0.0893698	-0.186341	0.792331	0.0573269	0.0181811	NA	STYX	0.127023	0.746569	0.037754	0.880824	CENTER
CAF1A_294	sp|Q9QWF0|CAF1A_MOUSE	Q9QWF0	294	0.985	PEGPSTPPEHRGGRSSPSTPACRVAKNFVKG	S	P	S	T	8	5	3	0.341353	-0.310286	0.0914442	0.0452524	0.641293	0.113698	0.425089	0.0370315	STYX	0.161811	0.390798	0.191939	0.466385	CENTER
CAF1B_422	sp|Q9D0N7|CAF1B_MOUSE	Q9D0N7	422	0.99	KAKNQTHQGSSPGSRSVEGTPSNRTQDPSSP	S	V	E	G	4	2	2	0.443631	0.527929	NA	NA	NA	0.353618	NA	0.402062	STYX	0.48578	0.0331456	0.37784	0.261643	CENTER
CAGE1_777 778 779	sp|Q5IR70|CAGE1_MOUSE	Q5IR70	777 778 779	0.894	NDKYRRHVGSLINKVTSYEEIIKCADQRLEI DKYRRHVGSLINKVTSYEEIIKCADQRLEIS KYRRHVGSLINKVTSYEEIIKCADQRLEISH	T	S	Y	E	6	3	3	0.548652	-0.584342	NA	NA	-0.421862	0.931731	1.20244	1.38978	STYX	-0.152518	0.299563	1.17465	0.00692225	NR
CALM1_102	sp|P0DP26|CALM1_MOUSE,sp|P0DP27|CALM2_MOUSE,sp|P0DP28|CALM3_MOUSE	P0DP26	102	0.998	REAFRVFDKDGNGYISAAELRHVMTNLGEKL	S	A	A	E	8	5	3	-0.348644	-0.519058	-0.26196	-0.327252	-0.0989933	0.980545	0.272838	0.584092	STYX	-0.311182	0.00100694	0.612492	0.0663368	CENTER
[truncated: 12,746 more rows]

## Sheet: RemovedQuadrSites
ProtName_site	All_Parent_Proteins	UniProtID	position	BestProb	Sequence_window		P.1	P.2	P.3	Total_ExpObservations	AZ20_ExpObservations	RAD1_ExpObservations	AZ20_4hr_1_ratio	AZ20_4hr_2_ratio	AZ20_4hr_3_ratio	AZ20_4hr_4_ratio	AZ20_4hr_5_ratio	RAD1_1_ratio	RAD1_2_ratio	RAD1_3_ratio	STY.Q.X	AZ20_Ratio_Avg	AZ20_pval	RAD1_Ratio_Avg	RAD1_pval	quadr
[truncated: 456 more rows]
