# Supplementary material for: Phosphoproteomics of ATR signaling in mouse testes
Source: eLife. 2022 Feb 8;11:e68648. doi: 10.7554/eLife.68648 (PMC8824463; doi:10.7554/eLife.68648)
Supplement: Supplementary file 2. — Gene ontology information from STRING-db for subsets of data from the 4 hr or 2.5–3-day ATRi treatment combined to Rad1 cKO. Each quadrant or type of filter applied is indicated on the tab name. [file elife-68648-supp2.xlsx]

## Sheet: Q1_4 hr Ontology
#term ID	term description	observed gene count	background gene count	strength	false discovery rate	"-LOG10(FDR)"	matching proteins in your network (IDs)	matching proteins in your network (labels)
GO:0007283	Spermatogenesis	27	542	0.85	5.54e-11	10.2565	10090.ENSMUSP00000008051,10090.ENSMUSP00000022081,10090.ENSMUSP00000023144,10090.ENSMUSP00000025250,10090.ENSMUSP00000029448,10090.ENSMUSP00000030306,10090.ENSMUSP00000035338,10090.ENSMUSP00000036422,10090.ENSMUSP00000036964,10090.ENSMUSP00000038590,10090.ENSMUSP00000039133,10090.ENSMUSP00000040302,10090.ENSMUSP00000042572,10090.ENSMUSP00000047925,10090.ENSMUSP00000053078,10090.ENSMUSP00000054909…	Cabs1,Spata9,Prm1,Bag6,Sycp1,Hook1,Tdrd6,Tbata,Spata6,Tcp11,Ythdc1,Tssk1,Spata20,Prm2,Tnp2,Txndc2,Micalcl,Rai14,Ccdc136,Mast2,Slc26a8,Iqcg,Ube2j1,Fsip2,H1fnt,Rimbp3,Spata18
GO:0019953	Sexual reproduction	30	834	0.71	1.68e-09	8.77469	10090.ENSMUSP00000008051,10090.ENSMUSP00000022081,10090.ENSMUSP00000023144,10090.ENSMUSP00000025250,10090.ENSMUSP00000029448,10090.ENSMUSP00000030306,10090.ENSMUSP00000035338,10090.ENSMUSP00000036422,10090.ENSMUSP00000036964,10090.ENSMUSP00000037978,10090.ENSMUSP00000038590,10090.ENSMUSP00000039133,10090.ENSMUSP00000040302,10090.ENSMUSP00000042572,10090.ENSMUSP00000047925,10090.ENSMUSP00000053078…	Cabs1,Spata9,Prm1,Bag6,Sycp1,Hook1,Tdrd6,Tbata,Spata6,Trim36,Tcp11,Ythdc1,Tssk1,Spata20,Prm2,Tnp2,Txndc2,Micalcl,Rai14,Ccdc136,Smcp,Mast2,Slc26a8,Iqcg,Ube2j1,Fsip2,H1fnt,Rimbp3,Cct4,Spata18
GO:0007018	Microtubule-based movement	19	336	0.91	2.41e-08	7.61798	10090.ENSMUSP00000024983,10090.ENSMUSP00000026009,10090.ENSMUSP00000030311,10090.ENSMUSP00000034239,10090.ENSMUSP00000042391,10090.ENSMUSP00000043304,10090.ENSMUSP00000050962,10090.ENSMUSP00000053078,10090.ENSMUSP00000054909,10090.ENSMUSP00000057896,10090.ENSMUSP00000074317,10090.ENSMUSP00000074661,10090.ENSMUSP00000077094,10090.ENSMUSP00000096487,10090.ENSMUSP00000103407,10090.ENSMUSP00000109237…	Ift140,Arl3,Ift74,Katnb1,Traf3ip1,Kif27,Akap4,Tnp2,Txndc2,Kif9,Gapdhs,Kif21b,Madd,Smcp,Zbbx,Copg1,Slc26a8,Iqcg,Fsip2
GO:0048515	Spermatid differentiation	15	181	1.07	2.42e-08	7.61618	10090.ENSMUSP00000023144,10090.ENSMUSP00000029448,10090.ENSMUSP00000030306,10090.ENSMUSP00000036422,10090.ENSMUSP00000040302,10090.ENSMUSP00000047925,10090.ENSMUSP00000053078,10090.ENSMUSP00000093789,10090.ENSMUSP00000102095,10090.ENSMUSP00000110412,10090.ENSMUSP00000110752,10090.ENSMUSP00000118333,10090.ENSMUSP00000120314,10090.ENSMUSP00000127616,10090.ENSMUSP00000127909	Prm1,Sycp1,Hook1,Tbata,Tssk1,Prm2,Tnp2,Ccdc136,Mast2,Slc26a8,Iqcg,Ube2j1,Fsip2,H1fnt,Rimbp3
GO:0048609	Multicellular organismal reproductive process	28	848	0.67	3.55e-08	7.44977	10090.ENSMUSP00000008051,10090.ENSMUSP00000022081,10090.ENSMUSP00000023144,10090.ENSMUSP00000025250,10090.ENSMUSP00000029448,10090.ENSMUSP00000030306,10090.ENSMUSP00000035338,10090.ENSMUSP00000036422,10090.ENSMUSP00000036964,10090.ENSMUSP00000038590,10090.ENSMUSP00000039133,10090.ENSMUSP00000040302,10090.ENSMUSP00000042572,10090.ENSMUSP00000047925,10090.ENSMUSP00000053078,10090.ENSMUSP00000054909…	Cabs1,Spata9,Prm1,Bag6,Sycp1,Hook1,Tdrd6,Tbata,Spata6,Tcp11,Ythdc1,Tssk1,Spata20,Prm2,Tnp2,Txndc2,Micalcl,Rai14,Ccdc136,Smcp,Mast2,Slc26a8,Iqcg,Ube2j1,Fsip2,H1fnt,Rimbp3,Spata18
GO:0007017	Microtubule-based process	24	722	0.67	6.79e-07	6.16813	10090.ENSMUSP00000024983,10090.ENSMUSP00000026009,10090.ENSMUSP00000027785,10090.ENSMUSP00000030306,10090.ENSMUSP00000030311,10090.ENSMUSP00000034239,10090.ENSMUSP00000037978,10090.ENSMUSP00000042391,10090.ENSMUSP00000043304,10090.ENSMUSP00000045827,10090.ENSMUSP00000050962,10090.ENSMUSP00000053078,10090.ENSMUSP00000054909,10090.ENSMUSP00000057896,10090.ENSMUSP00000074317,10090.ENSMUSP00000074661…	Ift140,Arl3,Sdccag8,Hook1,Ift74,Katnb1,Trim36,Traf3ip1,Kif27,Spata7,Akap4,Tnp2,Txndc2,Kif9,Gapdhs,Kif21b,Madd,Smcp,Zbbx,Copg1,Slc26a8,Iqcg,Ccdc13,Fsip2
GO:0003006	Developmental process involved in reproduction	28	1005	0.6	9.08e-07	6.04191	10090.ENSMUSP00000008051,10090.ENSMUSP00000022081,10090.ENSMUSP00000023144,10090.ENSMUSP00000025250,10090.ENSMUSP00000029448,10090.ENSMUSP00000030306,10090.ENSMUSP00000035338,10090.ENSMUSP00000036422,10090.ENSMUSP00000036964,10090.ENSMUSP00000038590,10090.ENSMUSP00000039133,10090.ENSMUSP00000040302,10090.ENSMUSP00000042572,10090.ENSMUSP00000047925,10090.ENSMUSP00000053078,10090.ENSMUSP00000054909…	Cabs1,Spata9,Prm1,Bag6,Sycp1,Hook1,Tdrd6,Tbata,Spata6,Tcp11,Ythdc1,Tssk1,Spata20,Prm2,Tnp2,Txndc2,Micalcl,Mmp14,Rai14,Ccdc136,Mast2,Slc26a8,Iqcg,Ube2j1,Fsip2,H1fnt,Rimbp3,Spata18
GO:0007286	Spermatid development	13	172	1.03	9.08e-07	6.04191	10090.ENSMUSP00000023144,10090.ENSMUSP00000029448,10090.ENSMUSP00000030306,10090.ENSMUSP00000040302,10090.ENSMUSP00000047925,10090.ENSMUSP00000053078,10090.ENSMUSP00000093789,10090.ENSMUSP00000110412,10090.ENSMUSP00000110752,10090.ENSMUSP00000118333,10090.ENSMUSP00000120314,10090.ENSMUSP00000127616,10090.ENSMUSP00000127909	Prm1,Sycp1,Hook1,Tssk1,Prm2,Tnp2,Ccdc136,Slc26a8,Iqcg,Ube2j1,Fsip2,H1fnt,Rimbp3
GO:0007281	Germ cell development	15	285	0.87	3.7e-06	5.4318	10090.ENSMUSP00000023144,10090.ENSMUSP00000029448,10090.ENSMUSP00000030306,10090.ENSMUSP00000035338,10090.ENSMUSP00000039133,10090.ENSMUSP00000040302,10090.ENSMUSP00000047925,10090.ENSMUSP00000053078,10090.ENSMUSP00000093789,10090.ENSMUSP00000110412,10090.ENSMUSP00000110752,10090.ENSMUSP00000118333,10090.ENSMUSP00000120314,10090.ENSMUSP00000127616,10090.ENSMUSP00000127909	Prm1,Sycp1,Hook1,Tdrd6,Ythdc1,Tssk1,Prm2,Tnp2,Ccdc136,Slc26a8,Iqcg,Ube2j1,Fsip2,H1fnt,Rimbp3
GO:0022412	Cellular process involved in reproduction in multicellular organism	17	384	0.8	3.7e-06	5.4318	10090.ENSMUSP00000023144,10090.ENSMUSP00000029448,10090.ENSMUSP00000030306,10090.ENSMUSP00000035338,10090.ENSMUSP00000036422,10090.ENSMUSP00000039133,10090.ENSMUSP00000040302,10090.ENSMUSP00000047925,10090.ENSMUSP00000053078,10090.ENSMUSP00000093789,10090.ENSMUSP00000102095,10090.ENSMUSP00000110412,10090.ENSMUSP00000110752,10090.ENSMUSP00000118333,10090.ENSMUSP00000120314,10090.ENSMUSP00000127616…	Prm1,Sycp1,Hook1,Tdrd6,Tbata,Ythdc1,Tssk1,Prm2,Tnp2,Ccdc136,Mast2,Slc26a8,Iqcg,Ube2j1,Fsip2,H1fnt,Rimbp3
GO:0022414	Reproductive process	33	1467	0.51	3.7e-06	5.4318	10090.ENSMUSP00000008051,10090.ENSMUSP00000022081,10090.ENSMUSP00000023144,10090.ENSMUSP00000025250,10090.ENSMUSP00000029448,10090.ENSMUSP00000030306,10090.ENSMUSP00000035338,10090.ENSMUSP00000036422,10090.ENSMUSP00000036964,10090.ENSMUSP00000037978,10090.ENSMUSP00000038590,10090.ENSMUSP00000039133,10090.ENSMUSP00000040302,10090.ENSMUSP00000042572,10090.ENSMUSP00000047925,10090.ENSMUSP00000050962…	Cabs1,Spata9,Prm1,Bag6,Sycp1,Hook1,Tdrd6,Tbata,Spata6,Trim36,Tcp11,Ythdc1,Tssk1,Spata20,Prm2,Akap4,Tnp2,Txndc2,Micalcl,Gapdhs,Mmp14,Rai14,Ccdc136,Smcp,Mast2,Slc26a8,Iqcg,Ube2j1,Fsip2,H1fnt,Rimbp3,Cct4,Spata18
GO:0003341	Cilium movement	10	146	0.99	0.00015	3.82391	10090.ENSMUSP00000043304,10090.ENSMUSP00000050962,10090.ENSMUSP00000053078,10090.ENSMUSP00000054909,10090.ENSMUSP00000074317,10090.ENSMUSP00000096487,10090.ENSMUSP00000103407,10090.ENSMUSP00000110412,10090.ENSMUSP00000110752,10090.ENSMUSP00000120314	Kif27,Akap4,Tnp2,Txndc2,Gapdhs,Smcp,Zbbx,Slc26a8,Iqcg,Fsip2
GO:0030317	Flagellated sperm motility	8	97	1.07	0.00068	3.16749	10090.ENSMUSP00000050962,10090.ENSMUSP00000053078,10090.ENSMUSP00000054909,10090.ENSMUSP00000074317,10090.ENSMUSP00000096487,10090.ENSMUSP00000110412,10090.ENSMUSP00000110752,10090.ENSMUSP00000120314	Akap4,Tnp2,Txndc2,Gapdhs,Smcp,Slc26a8,Iqcg,Fsip2
GO:0044782	Cilium organization	12	298	0.76	0.0014	2.85387	10090.ENSMUSP00000024983,10090.ENSMUSP00000026009,10090.ENSMUSP00000030311,10090.ENSMUSP00000031810,10090.ENSMUSP00000036964,10090.ENSMUSP00000042391,10090.ENSMUSP00000043304,10090.ENSMUSP00000050962,10090.ENSMUSP00000095303,10090.ENSMUSP00000110752,10090.ENSMUSP00000114787,10090.ENSMUSP00000120314	Ift140,Arl3,Ift74,Cep41,Spata6,Traf3ip1,Kif27,Akap4,Catip,Iqcg,Ccdc13,Fsip2
GO:0060271	Cilium assembly	11	262	0.78	0.0025	2.60206	10090.ENSMUSP00000024983,10090.ENSMUSP00000026009,10090.ENSMUSP00000030311,10090.ENSMUSP00000031810,10090.ENSMUSP00000036964,10090.ENSMUSP00000042391,10090.ENSMUSP00000043304,10090.ENSMUSP00000050962,10090.ENSMUSP00000110752,10090.ENSMUSP00000114787,10090.ENSMUSP00000120314	Ift140,Arl3,Ift74,Cep41,Spata6,Traf3ip1,Kif27,Akap4,Iqcg,Ccdc13,Fsip2
GO:0006996	Organelle organization	42	3066	0.29	0.0089	2.05061	10090.ENSMUSP00000013220,10090.ENSMUSP00000020630,10090.ENSMUSP00000021929,10090.ENSMUSP00000022458,10090.ENSMUSP00000023144,10090.ENSMUSP00000024983,10090.ENSMUSP00000025250,10090.ENSMUSP00000026009,10090.ENSMUSP00000027785,10090.ENSMUSP00000029448,10090.ENSMUSP00000030306,10090.ENSMUSP00000030311,10090.ENSMUSP00000031810,10090.ENSMUSP00000034239,10090.ENSMUSP00000035415,10090.ENSMUSP00000036964…	Amotl1,Hspa4,Habp4,Bap1,Prm1,Ift140,Bag6,Arl3,Sdccag8,Sycp1,Hook1,Ift74,Cep41,Katnb1,Atxn2l,Spata6,Git1,Trim36,Traf3ip1,Kif27,Spata7,Prm2,Akap4,Tnp2,Kif9,Micalcl,Nf1,Nap1l4,Ccdc136,Catip,Fmn1,Mast2,Iqcg,Mprip,Ino80c,Ccdc13,Fsip2,Nap1l1,Mettl4,H1fnt,Nsun4,Spata18
GO:0008380	RNA splicing	11	312	0.7	0.0114	1.9431	10090.ENSMUSP00000021929,10090.ENSMUSP00000022577,10090.ENSMUSP00000027127,10090.ENSMUSP00000031376,10090.ENSMUSP00000035338,10090.ENSMUSP00000036013,10090.ENSMUSP00000039133,10090.ENSMUSP00000078589,10090.ENSMUSP00000125003,10090.ENSMUSP00000130023,10090.ENSMUSP00000132963	Habp4,Zc3h13,Sf3b1,Zcchc8,Tdrd6,Cdk13,Ythdc1,Ybx1,Srrm1,Hnrnpf,Cd2bp2
GO:0022607	Cellular component assembly	31	1983	0.35	0.0133	1.87615	10090.ENSMUSP00000020630,10090.ENSMUSP00000024983,10090.ENSMUSP00000025250,10090.ENSMUSP00000025955,10090.ENSMUSP00000026009,10090.ENSMUSP00000027127,10090.ENSMUSP00000029448,10090.ENSMUSP00000030306,10090.ENSMUSP00000030311,10090.ENSMUSP00000031810,10090.ENSMUSP00000035338,10090.ENSMUSP00000035415,10090.ENSMUSP00000036964,10090.ENSMUSP00000039133,10090.ENSMUSP00000042391,10090.ENSMUSP00000043304…	Hspa4,Ift140,Bag6,Eif3a,Arl3,Sf3b1,Sycp1,Hook1,Ift74,Cep41,Tdrd6,Atxn2l,Spata6,Ythdc1,Traf3ip1,Kif27,Kctd19,Akap4,Mdm4,Nap1l4,Sgip1,Ccdc136,Catip,Pkp4,AI314180,Iqcg,Ccdc13,Fsip2,Nap1l1,H1fnt,Nsun4
GO:0016043	Cellular component organization	56	4769	0.22	0.0169	1.77211	10090.ENSMUSP00000013220,10090.ENSMUSP00000020630,10090.ENSMUSP00000021929,10090.ENSMUSP00000022458,10090.ENSMUSP00000023144,10090.ENSMUSP00000024983,10090.ENSMUSP00000025250,10090.ENSMUSP00000025955,10090.ENSMUSP00000026009,10090.ENSMUSP00000027127,10090.ENSMUSP00000027785,10090.ENSMUSP00000029448,10090.ENSMUSP00000030306,10090.ENSMUSP00000030311,10090.ENSMUSP00000031810,10090.ENSMUSP00000034239…	Amotl1,Hspa4,Habp4,Bap1,Prm1,Ift140,Bag6,Eif3a,Arl3,Sf3b1,Sdccag8,Sycp1,Hook1,Ift74,Cep41,Katnb1,Tdrd6,Atxn2l,Spata6,Git1,Trim36,Ythdc1,Traf3ip1,Kif27,Spata7,Prm2,Lmtk2,Kctd19,Akap4,Tnp2,Kif9,Micalcl,Lrrc56,Mdm4,Nf1,Nap1l4,Sgip1,Mmp14,Ccdc136,Catip,Fmn1,Pkp4,AI314180,Mast2,Clmn,Iqcg,Mprip,Crad,Ino80c,Ccdc13,Fsip2,Nap1l1,Mettl4,H1fnt,Nsun4,Spata18
GO:0006397	mRNA processing	12	399	0.63	0.0193	1.71444	10090.ENSMUSP00000021929,10090.ENSMUSP00000022577,10090.ENSMUSP00000025264,10090.ENSMUSP00000027127,10090.ENSMUSP00000031376,10090.ENSMUSP00000035338,10090.ENSMUSP00000036013,10090.ENSMUSP00000039133,10090.ENSMUSP00000078589,10090.ENSMUSP00000125003,10090.ENSMUSP00000130023,10090.ENSMUSP00000132963	Habp4,Zc3h13,Wdr33,Sf3b1,Zcchc8,Tdrd6,Cdk13,Ythdc1,Ybx1,Srrm1,Hnrnpf,Cd2bp2
GO:0016071	mRNA metabolic process	13	516	0.55	0.0465	1.33255	10090.ENSMUSP00000021929,10090.ENSMUSP00000022577,10090.ENSMUSP00000025264,10090.ENSMUSP00000027127,10090.ENSMUSP00000031376,10090.ENSMUSP00000035338,10090.ENSMUSP00000036013,10090.ENSMUSP00000039133,10090.ENSMUSP00000039134,10090.ENSMUSP00000078589,10090.ENSMUSP00000125003,10090.ENSMUSP00000130023,10090.ENSMUSP00000132963	Habp4,Zc3h13,Wdr33,Sf3b1,Zcchc8,Tdrd6,Cdk13,Ythdc1,Edc4,Ybx1,Srrm1,Hnrnpf,Cd2bp2

## Sheet: Q2_4 hr Ontology
#term ID	term description	observed gene count	background gene count	strength	false discovery rate	"-LOG10(FDR)"	matching proteins in your network (IDs)	matching proteins in your network (labels)
GO:0090304	Nucleic acid metabolic process	81	1777	0.55	2.94e-19	18.5317	10090.ENSMUSP00000005503,10090.ENSMUSP00000010940,10090.ENSMUSP00000015800,10090.ENSMUSP00000015892,10090.ENSMUSP00000020252,10090.ENSMUSP00000020365,10090.ENSMUSP00000020649,10090.ENSMUSP00000020931,10090.ENSMUSP00000021824,10090.ENSMUSP00000022793,10090.ENSMUSP00000023206,10090.ENSMUSP00000023813,10090.ENSMUSP00000024779,10090.ENSMUSP00000025241,10090.ENSMUSP00000025243,10090.ENSMUSP00000025930…	Msh6,Asz1,Hspa8,Prpf3,Sycp3,Mum1,Rad50,Smc6,Nol8,Acin1,Ercc4,Tarbp2,Usp49,Ercc3,Iws1,Smc3,Sf3b1,Trip12,Dtl,Prpf38b,Nbn,Psip1,Sfpq,Rfc1,Aplf,Pagr1a,Ints10,Topbp1,Tdrd6,Ccar2,Slx4,Ythdc1,Shprh,Smg7,Smg6,Smarca5,Atrip,Mael,Rbbp8,Leo1,Parp2,Alkbh5,Rbbp6,Akap8l,Setx,Nipbl,Slbp,Tceb2,Rsrc1,Cpsf3,Npm1,Prpf40a,Prpf4b,Tdrd9,U2surp,Eya3,Mdc1,Lin9,Srrm2,Ddx20,Rbm27,Srsf2,Tfam,Lig3,Sugp2,Hsp90aa1,Ddx4,Sirt1,…
GO:0006139	Nucleobase-containing compound metabolic process	83	2205	0.46	4.43e-15	14.3536	10090.ENSMUSP00000005503,10090.ENSMUSP00000010940,10090.ENSMUSP00000015800,10090.ENSMUSP00000015892,10090.ENSMUSP00000020252,10090.ENSMUSP00000020365,10090.ENSMUSP00000020649,10090.ENSMUSP00000020931,10090.ENSMUSP00000021824,10090.ENSMUSP00000022793,10090.ENSMUSP00000023206,10090.ENSMUSP00000023813,10090.ENSMUSP00000024779,10090.ENSMUSP00000025241,10090.ENSMUSP00000025243,10090.ENSMUSP00000025930…	Msh6,Asz1,Hspa8,Prpf3,Sycp3,Mum1,Rad50,Smc6,Nol8,Acin1,Ercc4,Tarbp2,Usp49,Ercc3,Iws1,Smc3,Pcgf6,Sf3b1,Trip12,Dtl,Prpf38b,Nbn,Psip1,Sfpq,Rfc1,Aplf,Pagr1a,Ints10,Topbp1,Tdrd6,Ccar2,Slx4,Ythdc1,Shprh,Smg7,Smg6,Smarca5,Atrip,Mael,Rbbp8,Leo1,Parp2,Alkbh5,Rbbp6,Acot10,Akap8l,Setx,Nipbl,Slbp,Tceb2,Rsrc1,Cpsf3,Npm1,Prpf40a,Prpf4b,Tdrd9,U2surp,Eya3,Mdc1,Lin9,Srrm2,Ddx20,Rbm27,Srsf2,Tfam,Lig3,Sugp2,Hsp90aa…
GO:0051276	Chromosome organization	53	946	0.64	4.64e-15	14.3335	10090.ENSMUSP00000003876,10090.ENSMUSP00000005503,10090.ENSMUSP00000006565,10090.ENSMUSP00000020252,10090.ENSMUSP00000020365,10090.ENSMUSP00000020649,10090.ENSMUSP00000020931,10090.ENSMUSP00000022793,10090.ENSMUSP00000023206,10090.ENSMUSP00000024657,10090.ENSMUSP00000024779,10090.ENSMUSP00000025241,10090.ENSMUSP00000025930,10090.ENSMUSP00000026032,10090.ENSMUSP00000029170,10090.ENSMUSP00000029879…	Brd8,Msh6,Cdc20,Sycp3,Mum1,Rad50,Smc6,Acin1,Ercc4,Phf10,Usp49,Ercc3,Smc3,Pcgf6,Rbl1,Nbn,Nasp,Sfpq,Cenpc1,Pagr1a,Coprs,Katnb1,Slx4,Shprh,Smg7,Msl1,Smg6,Smarca5,Mael,Leo1,Phf2,Akap8l,Tex14,Cenpe,Nipbl,Prm3,Espl1,Nup98,Nap1l4,Cdyl,Npm1,Hspa2,Eya3,Morc2a,Hsp90aa1,Hdac1,Sirt1,Rere,Brd1,Hat1,Hfm1,Uimc1,H1fnt
GO:0006259	DNA metabolic process	41	638	0.69	3.97e-13	12.4012	10090.ENSMUSP00000005503,10090.ENSMUSP00000010940,10090.ENSMUSP00000020252,10090.ENSMUSP00000020365,10090.ENSMUSP00000020649,10090.ENSMUSP00000020931,10090.ENSMUSP00000023206,10090.ENSMUSP00000025241,10090.ENSMUSP00000025930,10090.ENSMUSP00000027421,10090.ENSMUSP00000027933,10090.ENSMUSP00000029879,10090.ENSMUSP00000030623,10090.ENSMUSP00000031092,10090.ENSMUSP00000032130,10090.ENSMUSP00000032918…	Msh6,Asz1,Sycp3,Mum1,Rad50,Smc6,Ercc4,Ercc3,Smc3,Trip12,Dtl,Nbn,Sfpq,Rfc1,Aplf,Pagr1a,Topbp1,Slx4,Shprh,Smg7,Smg6,Atrip,Mael,Rbbp8,Parp2,Setx,Nipbl,Npm1,Tdrd9,Eya3,Mdc1,Lin9,Lig3,Hsp90aa1,Ddx4,Sirt1,Usp47,Tdrd1,Hfm1,Uimc1,Usp10
GO:1901360	Organic cyclic compound metabolic process	85	2614	0.4	2.33e-12	11.6326	10090.ENSMUSP00000003818,10090.ENSMUSP00000005003,10090.ENSMUSP00000005503,10090.ENSMUSP00000010940,10090.ENSMUSP00000015800,10090.ENSMUSP00000015892,10090.ENSMUSP00000020252,10090.ENSMUSP00000020365,10090.ENSMUSP00000020649,10090.ENSMUSP00000020931,10090.ENSMUSP00000021824,10090.ENSMUSP00000022793,10090.ENSMUSP00000023206,10090.ENSMUSP00000023813,10090.ENSMUSP00000024779,10090.ENSMUSP00000025241…	Insig2,Lbr,Msh6,Asz1,Hspa8,Prpf3,Sycp3,Mum1,Rad50,Smc6,Nol8,Acin1,Ercc4,Tarbp2,Usp49,Ercc3,Iws1,Smc3,Pcgf6,Sf3b1,Trip12,Dtl,Prpf38b,Nbn,Psip1,Sfpq,Rfc1,Aplf,Pagr1a,Ints10,Topbp1,Tdrd6,Ccar2,Slx4,Ythdc1,Shprh,Smg7,Smg6,Smarca5,Atrip,Mael,Rbbp8,Leo1,Parp2,Alkbh5,Rbbp6,Acot10,Akap8l,Setx,Nipbl,Slbp,Tceb2,Rsrc1,Cpsf3,Npm1,Prpf40a,Prpf4b,Tdrd9,U2surp,Eya3,Mdc1,Lin9,Srrm2,Ddx20,Rbm27,Srsf2,Tfam,Lig3,Su…
GO:0006996	Organelle organization	92	3066	0.36	1.06e-11	10.9747	10090.ENSMUSP00000002444,10090.ENSMUSP00000003876,10090.ENSMUSP00000005503,10090.ENSMUSP00000006565,10090.ENSMUSP00000010940,10090.ENSMUSP00000015800,10090.ENSMUSP00000020252,10090.ENSMUSP00000020365,10090.ENSMUSP00000020649,10090.ENSMUSP00000020931,10090.ENSMUSP00000022590,10090.ENSMUSP00000022682,10090.ENSMUSP00000022793,10090.ENSMUSP00000023206,10090.ENSMUSP00000023530,10090.ENSMUSP00000024657…	Rfx2,Brd8,Msh6,Cdc20,Asz1,Hspa8,Sycp3,Mum1,Rad50,Smc6,Dnajc15,Sorbs3,Acin1,Ercc4,Ropn1,Phf10,Usp49,Ercc3,Smc3,Pcgf6,Rbl1,Nbn,Spaca1,Murc,Nasp,Sfpq,Stmn1,Cenpc1,Pagr1a,Ccdc120,Coprs,Nek1,Katnb1,Lca5,Topbp1,Ccar2,Cep72,Slx4,Shprh,Pcm1,Smg7,Traf3ip1,Msl1,Smg6,Smarca5,Dync1li2,Mael,Leo1,Phf2,Akap4,Akap8l,Tex14,Cenpe,Nipbl,Prm3,Espl1,Nup98,Nap1l4,Cdyl,Npm1,Prpf40a,Tdrd9,Hspa2,Sycp2,Eya3,Tfam,Lig3,Morc…
GO:0006397	mRNA processing	31	399	0.78	1.56e-11	10.8069	10090.ENSMUSP00000015800,10090.ENSMUSP00000015892,10090.ENSMUSP00000022793,10090.ENSMUSP00000024779,10090.ENSMUSP00000025243,10090.ENSMUSP00000027127,10090.ENSMUSP00000029480,10090.ENSMUSP00000030207,10090.ENSMUSP00000030623,10090.ENSMUSP00000035338,10090.ENSMUSP00000036924,10090.ENSMUSP00000039133,10090.ENSMUSP00000046905,10090.ENSMUSP00000049116,10090.ENSMUSP00000049528,10090.ENSMUSP00000051389…	Hspa8,Prpf3,Acin1,Usp49,Iws1,Sf3b1,Prpf38b,Psip1,Sfpq,Tdrd6,Ccar2,Ythdc1,Leo1,Alkbh5,Rbbp6,Akap8l,Setx,Slbp,Rsrc1,Cpsf3,Prpf40a,Prpf4b,Srrm2,Ddx20,Rbm27,Srsf2,Sugp2,Srsf5,Hnrnpc,Hnrnpf,Cd2bp2
GO:0048232	Male gamete generation	36	563	0.69	2.32e-11	10.6345	10090.ENSMUSP00000002444,10090.ENSMUSP00000008051,10090.ENSMUSP00000010940,10090.ENSMUSP00000020252,10090.ENSMUSP00000023530,10090.ENSMUSP00000023813,10090.ENSMUSP00000025840,10090.ENSMUSP00000029927,10090.ENSMUSP00000034065,10090.ENSMUSP00000035338,10090.ENSMUSP00000039133,10090.ENSMUSP00000045430,10090.ENSMUSP00000045828,10090.ENSMUSP00000049116,10090.ENSMUSP00000051492,10090.ENSMUSP00000054444…	Rfx2,Cabs1,Asz1,Sycp3,Ropn1,Tarbp2,Mtl5,Spaca1,Nek1,Tdrd6,Ythdc1,Catsper1,Mael,Alkbh5,Setx,Tex14,Txndc2,Prm3,Kiaa1109,Cdyl,Tdrd9,Hspa2,Sycp2,Eif4g3,Ddx4,Sirt1,Cep131,Mast2,Spag8,Zfp541,Tdrd1,Hfm1,Cabyr,Ube2j1,Fsip2,H1fnt
GO:0034641	Cellular nitrogen compound metabolic process	86	2805	0.37	2.69e-11	10.5702	10090.ENSMUSP00000005503,10090.ENSMUSP00000010940,10090.ENSMUSP00000015800,10090.ENSMUSP00000015892,10090.ENSMUSP00000020252,10090.ENSMUSP00000020365,10090.ENSMUSP00000020649,10090.ENSMUSP00000020931,10090.ENSMUSP00000021824,10090.ENSMUSP00000022793,10090.ENSMUSP00000023206,10090.ENSMUSP00000023813,10090.ENSMUSP00000024779,10090.ENSMUSP00000025241,10090.ENSMUSP00000025243,10090.ENSMUSP00000025930…	Msh6,Asz1,Hspa8,Prpf3,Sycp3,Mum1,Rad50,Smc6,Nol8,Acin1,Ercc4,Tarbp2,Usp49,Ercc3,Iws1,Smc3,Pcgf6,Sf3b1,Trip12,Dtl,Prpf38b,Nbn,Psip1,Sfpq,Rfc1,Aplf,Pagr1a,Ints10,Topbp1,Tdrd6,Ccar2,Slx4,Ythdc1,Shprh,Smg7,Smg6,Smarca5,Atrip,Mael,Rbbp8,Leo1,Parp2,Alkbh5,Rbbp6,Acot10,Akap8l,Setx,Nipbl,Slbp,Tceb2,Rsrc1,Cpsf3,Npm1,Prpf40a,Prpf4b,Tdrd9,U2surp,Abce1,Eya3,Mdc1,Eif4g3,Rplp2,Lin9,Srrm2,Ddx20,Rbm27,Srsf2,Tfam…
GO:0007049	Cell cycle	51	1138	0.54	3.3e-11	10.4815	10090.ENSMUSP00000005503,10090.ENSMUSP00000006565,10090.ENSMUSP00000007800,10090.ENSMUSP00000010940,10090.ENSMUSP00000020252,10090.ENSMUSP00000020649,10090.ENSMUSP00000022612,10090.ENSMUSP00000022998,10090.ENSMUSP00000023206,10090.ENSMUSP00000025930,10090.ENSMUSP00000029170,10090.ENSMUSP00000029879,10090.ENSMUSP00000030456,10090.ENSMUSP00000030636,10090.ENSMUSP00000030665,10090.ENSMUSP00000031032…	Msh6,Cdc20,Arpp19,Asz1,Sycp3,Rad50,Pbk,Mtbp,Ercc4,Smc3,Rbl1,Nbn,Nasp,Stmn1,Nudc,Ppm1g,Cenpc1,Nek1,Katnb1,Usp2,Topbp1,Ccar2,Cep72,Slx4,Pcm1,Dlgap5,Mael,Rbbp8,Akap8l,Tex14,Cenpe,Nipbl,Espl1,Npm1,Tdrd9,Hspa2,Sycp2,Mdc1,Lin9,Srsf2,Lig3,Ddx4,Cep131,Spag8,Wdr62,Tdrd1,Hfm1,Zfp318,Cdca2,Cdk5rap2,Cep55
GO:0016071	mRNA metabolic process	34	516	0.71	4.56e-11	10.341	10090.ENSMUSP00000015800,10090.ENSMUSP00000015892,10090.ENSMUSP00000022793,10090.ENSMUSP00000024779,10090.ENSMUSP00000025243,10090.ENSMUSP00000027127,10090.ENSMUSP00000029480,10090.ENSMUSP00000030207,10090.ENSMUSP00000030623,10090.ENSMUSP00000035338,10090.ENSMUSP00000036924,10090.ENSMUSP00000039133,10090.ENSMUSP00000041241,10090.ENSMUSP00000043555,10090.ENSMUSP00000046905,10090.ENSMUSP00000049116…	Hspa8,Prpf3,Acin1,Usp49,Iws1,Sf3b1,Prpf38b,Psip1,Sfpq,Tdrd6,Ccar2,Ythdc1,Smg7,Smg6,Leo1,Alkbh5,Rbbp6,Akap8l,Setx,Slbp,Rsrc1,Cpsf3,Prpf40a,Prpf4b,Srrm2,Ddx20,Rbm27,Srsf2,Sugp2,Srsf5,Hnrnpc,Hnrnpdl,Hnrnpf,Cd2bp2
GO:0006281	DNA repair	31	435	0.74	8.83e-11	10.054	10090.ENSMUSP00000005503,10090.ENSMUSP00000020252,10090.ENSMUSP00000020365,10090.ENSMUSP00000020649,10090.ENSMUSP00000020931,10090.ENSMUSP00000023206,10090.ENSMUSP00000025241,10090.ENSMUSP00000025930,10090.ENSMUSP00000027421,10090.ENSMUSP00000027933,10090.ENSMUSP00000029879,10090.ENSMUSP00000030623,10090.ENSMUSP00000031092,10090.ENSMUSP00000032130,10090.ENSMUSP00000032918,10090.ENSMUSP00000035164…	Msh6,Sycp3,Mum1,Rad50,Smc6,Ercc4,Ercc3,Smc3,Trip12,Dtl,Nbn,Sfpq,Rfc1,Aplf,Pagr1a,Topbp1,Slx4,Shprh,Atrip,Rbbp8,Parp2,Setx,Nipbl,Npm1,Eya3,Mdc1,Lig3,Sirt1,Usp47,Uimc1,Usp10
GO:0007283	Spermatogenesis	34	542	0.68	1.49e-10	9.82681	10090.ENSMUSP00000002444,10090.ENSMUSP00000008051,10090.ENSMUSP00000010940,10090.ENSMUSP00000020252,10090.ENSMUSP00000023530,10090.ENSMUSP00000023813,10090.ENSMUSP00000025840,10090.ENSMUSP00000029927,10090.ENSMUSP00000034065,10090.ENSMUSP00000035338,10090.ENSMUSP00000039133,10090.ENSMUSP00000045430,10090.ENSMUSP00000045828,10090.ENSMUSP00000049116,10090.ENSMUSP00000051492,10090.ENSMUSP00000054909…	Rfx2,Cabs1,Asz1,Sycp3,Ropn1,Tarbp2,Mtl5,Spaca1,Nek1,Tdrd6,Ythdc1,Catsper1,Mael,Alkbh5,Setx,Txndc2,Prm3,Kiaa1109,Cdyl,Tdrd9,Hspa2,Eif4g3,Ddx4,Sirt1,Cep131,Mast2,Spag8,Zfp541,Tdrd1,Hfm1,Cabyr,Ube2j1,Fsip2,H1fnt
GO:0016070	RNA metabolic process	52	1240	0.51	1.63e-10	9.78781	10090.ENSMUSP00000010940,10090.ENSMUSP00000015800,10090.ENSMUSP00000015892,10090.ENSMUSP00000021824,10090.ENSMUSP00000022793,10090.ENSMUSP00000023813,10090.ENSMUSP00000024779,10090.ENSMUSP00000025241,10090.ENSMUSP00000025243,10090.ENSMUSP00000027127,10090.ENSMUSP00000029480,10090.ENSMUSP00000030207,10090.ENSMUSP00000030623,10090.ENSMUSP00000034328,10090.ENSMUSP00000035338,10090.ENSMUSP00000036924…	Asz1,Hspa8,Prpf3,Nol8,Acin1,Tarbp2,Usp49,Ercc3,Iws1,Sf3b1,Prpf38b,Psip1,Sfpq,Ints10,Tdrd6,Ccar2,Ythdc1,Smg7,Smg6,Smarca5,Mael,Leo1,Alkbh5,Rbbp6,Akap8l,Setx,Slbp,Tceb2,Rsrc1,Cpsf3,Npm1,Prpf40a,Prpf4b,Tdrd9,U2surp,Lin9,Srrm2,Ddx20,Rbm27,Srsf2,Tfam,Sugp2,Ddx4,Srsf5,Tdrd1,Hnrnpc,Hnrnpdl,Nolc1,Hnrnpf,Cd2bp2,Lin52,Tcof1
GO:0006974	Cellular response to dna damage stimulus	37	667	0.63	3.48e-10	9.45842	10090.ENSMUSP00000005503,10090.ENSMUSP00000020252,10090.ENSMUSP00000020365,10090.ENSMUSP00000020649,10090.ENSMUSP00000020931,10090.ENSMUSP00000023206,10090.ENSMUSP00000025241,10090.ENSMUSP00000025930,10090.ENSMUSP00000027421,10090.ENSMUSP00000027933,10090.ENSMUSP00000029879,10090.ENSMUSP00000030623,10090.ENSMUSP00000031092,10090.ENSMUSP00000032130,10090.ENSMUSP00000032918,10090.ENSMUSP00000034065…	Msh6,Sycp3,Mum1,Rad50,Smc6,Ercc4,Ercc3,Smc3,Trip12,Dtl,Nbn,Sfpq,Rfc1,Aplf,Pagr1a,Nek1,Topbp1,Ccar2,Slx4,Shprh,Atrip,Mael,Rbbp8,Parp2,Rbbp6,Setx,Nipbl,Npm1,Eya3,Mdc1,Lig3,Morc2a,Sirt1,Usp47,Ccdc13,Uimc1,Usp10
GO:0019219	Regulation of nucleobase-containing compound metabolic process	91	3265	0.33	5.15e-10	9.28819	10090.ENSMUSP00000001620,10090.ENSMUSP00000002444,10090.ENSMUSP00000003818,10090.ENSMUSP00000003876,10090.ENSMUSP00000005503,10090.ENSMUSP00000005620,10090.ENSMUSP00000015800,10090.ENSMUSP00000018909,10090.ENSMUSP00000020649,10090.ENSMUSP00000021824,10090.ENSMUSP00000022682,10090.ENSMUSP00000022793,10090.ENSMUSP00000023206,10090.ENSMUSP00000023813,10090.ENSMUSP00000024657,10090.ENSMUSP00000025241…	Fxr1,Rfx2,Insig2,Brd8,Msh6,Dnajb1,Hspa8,Fxr2,Rad50,Nol8,Sorbs3,Acin1,Ercc4,Tarbp2,Phf10,Ercc3,Iws1,Mtl5,Pcgf6,Trip12,Ncl,BC005624,Rbl1,Nbn,Murc,Psip1,Sfpq,Rfc1,Aplf,Pagr1a,Usp2,Ccar2,Slx4,Ythdc1,Smg7,Traf3ip1,Smg6,Bclaf1,Smarca5,Mael,Rbbp8,Camk4,Leo1,Phf2,Fnip1,Sltm,Alkbh5,Akap8l,Setx,Zbtb11,Nipbl,Ilf3,Tceb2,Rbm12b2,Sbno1,Zfp608,Nup98,Cdyl,Npm1,Abce1,Eya3,Lin9,Ddx20,Srsf2,Tfam,Lig3,Morc2a,Hsf5,Hs…
GO:0007276	Gamete generation	37	691	0.62	8.49e-10	9.07109	10090.ENSMUSP00000002444,10090.ENSMUSP00000008051,10090.ENSMUSP00000010940,10090.ENSMUSP00000020252,10090.ENSMUSP00000023530,10090.ENSMUSP00000023813,10090.ENSMUSP00000025840,10090.ENSMUSP00000029927,10090.ENSMUSP00000034065,10090.ENSMUSP00000035338,10090.ENSMUSP00000039133,10090.ENSMUSP00000045430,10090.ENSMUSP00000045828,10090.ENSMUSP00000049116,10090.ENSMUSP00000051492,10090.ENSMUSP00000054444…	Rfx2,Cabs1,Asz1,Sycp3,Ropn1,Tarbp2,Mtl5,Spaca1,Nek1,Tdrd6,Ythdc1,Catsper1,Mael,Alkbh5,Setx,Tex14,Txndc2,Prm3,Kiaa1109,Cdyl,Tdrd9,Hspa2,Sycp2,Eif4g3,Ddx20,Ddx4,Sirt1,Cep131,Mast2,Spag8,Zfp541,Tdrd1,Hfm1,Cabyr,Ube2j1,Fsip2,H1fnt
GO:0060255	Regulation of macromolecule metabolic process	127	5618	0.24	4.02e-09	8.39577	10090.ENSMUSP00000001620,10090.ENSMUSP00000002444,10090.ENSMUSP00000003818,10090.ENSMUSP00000003876,10090.ENSMUSP00000005503,10090.ENSMUSP00000005620,10090.ENSMUSP00000006565,10090.ENSMUSP00000007800,10090.ENSMUSP00000010940,10090.ENSMUSP00000013338,10090.ENSMUSP00000015800,10090.ENSMUSP00000018909,10090.ENSMUSP00000020649,10090.ENSMUSP00000021824,10090.ENSMUSP00000022612,10090.ENSMUSP00000022682…	Fxr1,Rfx2,Insig2,Brd8,Msh6,Dnajb1,Cdc20,Arpp19,Asz1,Arih2,Hspa8,Fxr2,Rad50,Nol8,Pbk,Sorbs3,Acin1,Mtbp,Ercc4,Ropn1,Tarbp2,Phf10,Ercc3,Iws1,Apba1,Mtl5,Smc3,Pcgf6,Trip12,Ncl,Pask,Ppp1r7,Dtl,BC005624,Rbl1,Nbn,Murc,Psip1,Sfpq,Rfc1,Aplf,Pagr1a,Nek1,Usp2,Ccar2,Slx4,Ythdc1,Psmf1,Smg7,Traf3ip1,Smg6,Bclaf1,Smarca5,Ttbk1,Mael,Rbbp8,Camk4,Leo1,Phf2,Fnip1,Sltm,Alkbh5,Rbbp6,Akap8l,Setx,Fscb,Zbtb11,Cenpe,Nipbl,…
GO:0000003	Reproduction	54	1469	0.45	5.75e-09	8.24033	10090.ENSMUSP00000002444,10090.ENSMUSP00000005503,10090.ENSMUSP00000008051,10090.ENSMUSP00000010940,10090.ENSMUSP00000020252,10090.ENSMUSP00000020649,10090.ENSMUSP00000023206,10090.ENSMUSP00000023530,10090.ENSMUSP00000023813,10090.ENSMUSP00000025840,10090.ENSMUSP00000025930,10090.ENSMUSP00000029879,10090.ENSMUSP00000029927,10090.ENSMUSP00000031170,10090.ENSMUSP00000034065,10090.ENSMUSP00000035164…	Rfx2,Msh6,Cabs1,Asz1,Sycp3,Rad50,Ercc4,Ropn1,Tarbp2,Mtl5,Smc3,Nbn,Spaca1,Cenpc1,Nek1,Topbp1,Tdrd6,Slx4,Ythdc1,Catsper1,Mael,Rbbp8,Alkbh5,Akap4,Setx,Tex14,Txndc2,Nipbl,Prm3,Kiaa1109,Espl1,Cdyl,Tdrd9,Hspa2,Sycp2,Eif4g3,Lin9,Adnp,Ddx20,Smcp,Ddx4,Sirt1,Cep131,Mast2,Spag8,Zfp541,Tdrd1,Hfm1,Zfp318,Cabyr,Wdr66,Ube2j1,Fsip2,H1fnt
GO:0008380	RNA splicing	24	312	0.77	9.34e-09	8.02965	10090.ENSMUSP00000015800,10090.ENSMUSP00000015892,10090.ENSMUSP00000022793,10090.ENSMUSP00000024779,10090.ENSMUSP00000025243,10090.ENSMUSP00000027127,10090.ENSMUSP00000029480,10090.ENSMUSP00000030207,10090.ENSMUSP00000030623,10090.ENSMUSP00000035338,10090.ENSMUSP00000036924,10090.ENSMUSP00000039133,10090.ENSMUSP00000051492,10090.ENSMUSP00000066797,10090.ENSMUSP00000075655,10090.ENSMUSP00000077019…	Hspa8,Prpf3,Acin1,Usp49,Iws1,Sf3b1,Prpf38b,Psip1,Sfpq,Tdrd6,Ccar2,Ythdc1,Setx,Rsrc1,Prpf40a,Prpf4b,Srrm2,Ddx20,Srsf2,Sugp2,Srsf5,Hnrnpc,Hnrnpf,Cd2bp2
GO:0051321	Meiotic cell cycle	21	229	0.85	9.34e-09	8.02965	10090.ENSMUSP00000005503,10090.ENSMUSP00000010940,10090.ENSMUSP00000020252,10090.ENSMUSP00000020649,10090.ENSMUSP00000023206,10090.ENSMUSP00000025930,10090.ENSMUSP00000029879,10090.ENSMUSP00000031170,10090.ENSMUSP00000035164,10090.ENSMUSP00000038871,10090.ENSMUSP00000045828,10090.ENSMUSP00000046255,10090.ENSMUSP00000054444,10090.ENSMUSP00000064465,10090.ENSMUSP00000078022,10090.ENSMUSP00000079306…	Msh6,Asz1,Sycp3,Rad50,Ercc4,Smc3,Nbn,Cenpc1,Topbp1,Slx4,Mael,Rbbp8,Tex14,Espl1,Tdrd9,Hspa2,Sycp2,Ddx4,Tdrd1,Hfm1,Zfp318
GO:0043170	Macromolecule metabolic process	121	5313	0.24	1.02e-08	7.9914	10090.ENSMUSP00000003876,10090.ENSMUSP00000005503,10090.ENSMUSP00000006565,10090.ENSMUSP00000010940,10090.ENSMUSP00000013338,10090.ENSMUSP00000015800,10090.ENSMUSP00000015892,10090.ENSMUSP00000020252,10090.ENSMUSP00000020365,10090.ENSMUSP00000020649,10090.ENSMUSP00000020931,10090.ENSMUSP00000021824,10090.ENSMUSP00000022612,10090.ENSMUSP00000022793,10090.ENSMUSP00000023206,10090.ENSMUSP00000023813…	Brd8,Msh6,Cdc20,Asz1,Arih2,Hspa8,Prpf3,Sycp3,Mum1,Rad50,Smc6,Nol8,Pbk,Acin1,Ercc4,Tarbp2,Phf10,Usp49,Ercc3,Iws1,Smc3,Pcgf6,Sf3b1,Trip12,Pask,Dtl,Prpf38b,Nbn,Psip1,Nasp,Sfpq,Ppm1g,Rfc1,Aplf,Pagr1a,Coprs,Nek1,Ints10,Usp2,Nktr,Topbp1,Tdrd6,Ccar2,Slx4,Ythdc1,Shprh,Psmf1,Smg7,Msl1,Smg6,Smarca5,Ttbk1,Atrip,Mael,Rbbp8,Camk4,Leo1,Phf2,Parp2,Alkbh5,Rbbp6,Akap8l,Setx,Ddi1,Tex14,Nipbl,Ppp1r2,Slbp,Espl1,Ilf3…
GO:0048609	Multicellular organismal reproductive process	39	848	0.55	1.26e-08	7.89963	10090.ENSMUSP00000002444,10090.ENSMUSP00000008051,10090.ENSMUSP00000010940,10090.ENSMUSP00000020252,10090.ENSMUSP00000023530,10090.ENSMUSP00000023813,10090.ENSMUSP00000025840,10090.ENSMUSP00000029927,10090.ENSMUSP00000034065,10090.ENSMUSP00000035338,10090.ENSMUSP00000039133,10090.ENSMUSP00000045430,10090.ENSMUSP00000045828,10090.ENSMUSP00000049116,10090.ENSMUSP00000051492,10090.ENSMUSP00000054444…	Rfx2,Cabs1,Asz1,Sycp3,Ropn1,Tarbp2,Mtl5,Spaca1,Nek1,Tdrd6,Ythdc1,Catsper1,Mael,Alkbh5,Setx,Tex14,Txndc2,Prm3,Kiaa1109,Cdyl,Tdrd9,Hspa2,Sycp2,Eif4g3,Adnp,Ddx20,Smcp,Ddx4,Sirt1,Cep131,Mast2,Spag8,Zfp541,Tdrd1,Hfm1,Cabyr,Ube2j1,Fsip2,H1fnt
GO:0006396	RNA processing	36	735	0.58	1.41e-08	7.85078	10090.ENSMUSP00000015800,10090.ENSMUSP00000015892,10090.ENSMUSP00000021824,10090.ENSMUSP00000022793,10090.ENSMUSP00000023813,10090.ENSMUSP00000024779,10090.ENSMUSP00000025243,10090.ENSMUSP00000027127,10090.ENSMUSP00000029480,10090.ENSMUSP00000030207,10090.ENSMUSP00000030623,10090.ENSMUSP00000034328,10090.ENSMUSP00000035338,10090.ENSMUSP00000036924,10090.ENSMUSP00000039133,10090.ENSMUSP00000046905…	Hspa8,Prpf3,Nol8,Acin1,Tarbp2,Usp49,Iws1,Sf3b1,Prpf38b,Psip1,Sfpq,Ints10,Tdrd6,Ccar2,Ythdc1,Leo1,Alkbh5,Rbbp6,Akap8l,Setx,Slbp,Rsrc1,Cpsf3,Npm1,Prpf40a,Prpf4b,U2surp,Srrm2,Ddx20,Rbm27,Srsf2,Sugp2,Srsf5,Hnrnpc,Hnrnpf,Cd2bp2
GO:0022414	Reproductive process	53	1467	0.44	1.41e-08	7.85078	10090.ENSMUSP00000002444,10090.ENSMUSP00000005503,10090.ENSMUSP00000008051,10090.ENSMUSP00000010940,10090.ENSMUSP00000020252,10090.ENSMUSP00000020649,10090.ENSMUSP00000023206,10090.ENSMUSP00000023530,10090.ENSMUSP00000023813,10090.ENSMUSP00000025840,10090.ENSMUSP00000025930,10090.ENSMUSP00000029879,10090.ENSMUSP00000029927,10090.ENSMUSP00000031170,10090.ENSMUSP00000034065,10090.ENSMUSP00000035164…	Rfx2,Msh6,Cabs1,Asz1,Sycp3,Rad50,Ercc4,Ropn1,Tarbp2,Mtl5,Smc3,Nbn,Spaca1,Cenpc1,Nek1,Topbp1,Tdrd6,Slx4,Ythdc1,Catsper1,Mael,Rbbp8,Alkbh5,Akap4,Setx,Tex14,Txndc2,Nipbl,Prm3,Kiaa1109,Espl1,Cdyl,Tdrd9,Hspa2,Sycp2,Eif4g3,Adnp,Ddx20,Smcp,Ddx4,Sirt1,Cep131,Mast2,Spag8,Zfp541,Tdrd1,Hfm1,Zfp318,Cabyr,Wdr66,Ube2j1,Fsip2,H1fnt
GO:0019222	Regulation of metabolic process	132	6085	0.22	1.53e-08	7.81531	10090.ENSMUSP00000001279,10090.ENSMUSP00000001620,10090.ENSMUSP00000002444,10090.ENSMUSP00000003818,10090.ENSMUSP00000003876,10090.ENSMUSP00000005503,10090.ENSMUSP00000005620,10090.ENSMUSP00000006565,10090.ENSMUSP00000007800,10090.ENSMUSP00000010940,10090.ENSMUSP00000013338,10090.ENSMUSP00000015800,10090.ENSMUSP00000018909,10090.ENSMUSP00000020649,10090.ENSMUSP00000021824,10090.ENSMUSP00000022590…	Lsr,Fxr1,Rfx2,Insig2,Brd8,Msh6,Dnajb1,Cdc20,Arpp19,Asz1,Arih2,Hspa8,Fxr2,Rad50,Nol8,Dnajc15,Pbk,Sorbs3,Acin1,Mtbp,Ercc4,Ropn1,Tarbp2,Phf10,Ercc3,Iws1,Apba1,Mtl5,Smc3,Pcgf6,Trip12,Ncl,Pask,Ppp1r7,Dtl,BC005624,Rbl1,Nbn,Murc,Psip1,Sfpq,Rfc1,Aplf,Pagr1a,Nek1,Usp2,Ccar2,Slx4,Ythdc1,Psmf1,Smg7,Traf3ip1,Smg6,Bclaf1,Smarca5,Ttbk1,Suco,Mael,Rbbp8,Camk4,Leo1,Phf2,Fnip1,Sltm,Alkbh5,Rbbp6,Akap8l,Setx,Fscb,Zb…
GO:0019953	Sexual reproduction	38	834	0.55	2.53e-08	7.59688	10090.ENSMUSP00000002444,10090.ENSMUSP00000008051,10090.ENSMUSP00000010940,10090.ENSMUSP00000020252,10090.ENSMUSP00000023530,10090.ENSMUSP00000023813,10090.ENSMUSP00000025840,10090.ENSMUSP00000029927,10090.ENSMUSP00000034065,10090.ENSMUSP00000035338,10090.ENSMUSP00000039133,10090.ENSMUSP00000045430,10090.ENSMUSP00000045828,10090.ENSMUSP00000049116,10090.ENSMUSP00000051492,10090.ENSMUSP00000054444…	Rfx2,Cabs1,Asz1,Sycp3,Ropn1,Tarbp2,Mtl5,Spaca1,Nek1,Tdrd6,Ythdc1,Catsper1,Mael,Alkbh5,Setx,Tex14,Txndc2,Prm3,Kiaa1109,Cdyl,Tdrd9,Hspa2,Sycp2,Eif4g3,Ddx20,Smcp,Ddx4,Sirt1,Cep131,Mast2,Spag8,Zfp541,Tdrd1,Hfm1,Cabyr,Ube2j1,Fsip2,H1fnt
GO:0016043	Cellular component organization	111	4769	0.25	2.79e-08	7.5544	10090.ENSMUSP00000001279,10090.ENSMUSP00000002444,10090.ENSMUSP00000003876,10090.ENSMUSP00000005503,10090.ENSMUSP00000006565,10090.ENSMUSP00000010940,10090.ENSMUSP00000015800,10090.ENSMUSP00000015892,10090.ENSMUSP00000020252,10090.ENSMUSP00000020365,10090.ENSMUSP00000020649,10090.ENSMUSP00000020931,10090.ENSMUSP00000022590,10090.ENSMUSP00000022682,10090.ENSMUSP00000022793,10090.ENSMUSP00000023206…	Lsr,Rfx2,Brd8,Msh6,Cdc20,Asz1,Hspa8,Prpf3,Sycp3,Mum1,Rad50,Smc6,Dnajc15,Sorbs3,Acin1,Ercc4,Ropn1,Tarbp2,Phf10,Usp49,Ercc3,Apba1,Smc3,Pcgf6,Sf3b1,Rbl1,Nbn,Spaca1,Murc,Psip1,Nasp,Sfpq,Stmn1,Cenpc1,Pagr1a,Ccdc120,Coprs,Nek1,Katnb1,Lca5,Topbp1,Tdrd6,Gramd1c,Ccar2,Cep72,Slx4,Ythdc1,Shprh,Pcm1,Smg7,Traf3ip1,Msl1,Smg6,Smarca5,Catsper1,Dync1li2,Mael,Leo1,Phf2,Akap4,Akap8l,Setx,Tex14,Cenpe,Nipbl,Prm3,Espl…
GO:0080090	Regulation of primary metabolic process	119	5290	0.24	2.98e-08	7.52578	10090.ENSMUSP00000001279,10090.ENSMUSP00000001620,10090.ENSMUSP00000002444,10090.ENSMUSP00000003818,10090.ENSMUSP00000003876,10090.ENSMUSP00000005503,10090.ENSMUSP00000005620,10090.ENSMUSP00000006565,10090.ENSMUSP00000007800,10090.ENSMUSP00000013338,10090.ENSMUSP00000015800,10090.ENSMUSP00000018909,10090.ENSMUSP00000020649,10090.ENSMUSP00000021824,10090.ENSMUSP00000022590,10090.ENSMUSP00000022612…	Lsr,Fxr1,Rfx2,Insig2,Brd8,Msh6,Dnajb1,Cdc20,Arpp19,Arih2,Hspa8,Fxr2,Rad50,Nol8,Dnajc15,Pbk,Sorbs3,Acin1,Mtbp,Ercc4,Ropn1,Tarbp2,Phf10,Ercc3,Iws1,Mtl5,Pcgf6,Trip12,Ncl,Pask,Ppp1r7,Dtl,BC005624,Rbl1,Nbn,Murc,Psip1,Sfpq,Rfc1,Aplf,Pagr1a,Nek1,Usp2,Ccar2,Slx4,Ythdc1,Psmf1,Smg7,Traf3ip1,Smg6,Bclaf1,Smarca5,Ttbk1,Mael,Rbbp8,Camk4,Leo1,Phf2,Fnip1,Sltm,Alkbh5,Akap8l,Setx,Fscb,Zbtb11,Cenpe,Nipbl,Ppp1r2,Ilf…
GO:0071840	Cellular component organization or biogenesis	113	4954	0.25	5.52e-08	7.25806	10090.ENSMUSP00000001279,10090.ENSMUSP00000002444,10090.ENSMUSP00000003876,10090.ENSMUSP00000005503,10090.ENSMUSP00000006565,10090.ENSMUSP00000010940,10090.ENSMUSP00000015800,10090.ENSMUSP00000015892,10090.ENSMUSP00000020252,10090.ENSMUSP00000020365,10090.ENSMUSP00000020649,10090.ENSMUSP00000020931,10090.ENSMUSP00000021824,10090.ENSMUSP00000022590,10090.ENSMUSP00000022682,10090.ENSMUSP00000022793…	Lsr,Rfx2,Brd8,Msh6,Cdc20,Asz1,Hspa8,Prpf3,Sycp3,Mum1,Rad50,Smc6,Nol8,Dnajc15,Sorbs3,Acin1,Ercc4,Ropn1,Tarbp2,Phf10,Usp49,Ercc3,Apba1,Smc3,Pcgf6,Sf3b1,Rbl1,Nbn,Spaca1,Murc,Psip1,Nasp,Sfpq,Stmn1,Gnl2,Cenpc1,Pagr1a,Ccdc120,Coprs,Nek1,Katnb1,Lca5,Topbp1,Tdrd6,Gramd1c,Ccar2,Cep72,Slx4,Ythdc1,Shprh,Pcm1,Smg7,Traf3ip1,Msl1,Smg6,Smarca5,Catsper1,Dync1li2,Mael,Leo1,Phf2,Akap4,Akap8l,Setx,Tex14,Cenpe,Nipbl…
GO:0031323	Regulation of cellular metabolic process	121	5479	0.23	5.75e-08	7.24033	10090.ENSMUSP00000001620,10090.ENSMUSP00000002444,10090.ENSMUSP00000003818,10090.ENSMUSP00000003876,10090.ENSMUSP00000005503,10090.ENSMUSP00000005620,10090.ENSMUSP00000006565,10090.ENSMUSP00000007800,10090.ENSMUSP00000013338,10090.ENSMUSP00000015800,10090.ENSMUSP00000018909,10090.ENSMUSP00000020649,10090.ENSMUSP00000021824,10090.ENSMUSP00000022590,10090.ENSMUSP00000022612,10090.ENSMUSP00000022682…	Fxr1,Rfx2,Insig2,Brd8,Msh6,Dnajb1,Cdc20,Arpp19,Arih2,Hspa8,Fxr2,Rad50,Nol8,Dnajc15,Pbk,Sorbs3,Acin1,Mtbp,Ercc4,Ropn1,Tarbp2,Phf10,Ercc3,Iws1,Mtl5,Smc3,Pcgf6,Trip12,Ncl,Pask,Ppp1r7,BC005624,Rbl1,Nbn,Murc,Psip1,Sfpq,Rfc1,Aplf,Pagr1a,Nek1,Usp2,Ccar2,Slx4,Ythdc1,Psmf1,Smg7,Traf3ip1,Smg6,Bclaf1,Smarca5,Ttbk1,Mael,Rbbp8,Camk4,Leo1,Phf2,Fnip1,Sltm,Alkbh5,Rbbp6,Akap8l,Setx,Fscb,Zbtb11,Cenpe,Nipbl,Ppp1r2,…
GO:0022412	Cellular process involved in reproduction in multicellular organism	25	384	0.7	6.35e-08	7.19723	10090.ENSMUSP00000002444,10090.ENSMUSP00000010940,10090.ENSMUSP00000020252,10090.ENSMUSP00000023530,10090.ENSMUSP00000023813,10090.ENSMUSP00000029927,10090.ENSMUSP00000035338,10090.ENSMUSP00000039133,10090.ENSMUSP00000045430,10090.ENSMUSP00000045828,10090.ENSMUSP00000054444,10090.ENSMUSP00000074707,10090.ENSMUSP00000078022,10090.ENSMUSP00000079306,10090.ENSMUSP00000079909,10090.ENSMUSP00000088176…	Rfx2,Asz1,Sycp3,Ropn1,Tarbp2,Spaca1,Tdrd6,Ythdc1,Catsper1,Mael,Tex14,Cdyl,Tdrd9,Hspa2,Sycp2,Ddx20,Ddx4,Cep131,Mast2,Tdrd1,Hfm1,Cabyr,Ube2j1,Fsip2,H1fnt
GO:0051171	Regulation of nitrogen compound metabolic process	115	5126	0.24	8.67e-08	7.06198	10090.ENSMUSP00000001620,10090.ENSMUSP00000002444,10090.ENSMUSP00000003818,10090.ENSMUSP00000003876,10090.ENSMUSP00000005503,10090.ENSMUSP00000005620,10090.ENSMUSP00000006565,10090.ENSMUSP00000007800,10090.ENSMUSP00000013338,10090.ENSMUSP00000015800,10090.ENSMUSP00000018909,10090.ENSMUSP00000020649,10090.ENSMUSP00000021824,10090.ENSMUSP00000022612,10090.ENSMUSP00000022682,10090.ENSMUSP00000022793…	Fxr1,Rfx2,Insig2,Brd8,Msh6,Dnajb1,Cdc20,Arpp19,Arih2,Hspa8,Fxr2,Rad50,Nol8,Pbk,Sorbs3,Acin1,Mtbp,Ercc4,Ropn1,Tarbp2,Phf10,Ercc3,Iws1,Mtl5,Pcgf6,Trip12,Ncl,Ppp1r7,Dtl,BC005624,Rbl1,Nbn,Murc,Psip1,Sfpq,Rfc1,Aplf,Pagr1a,Nek1,Usp2,Ccar2,Slx4,Ythdc1,Psmf1,Smg7,Traf3ip1,Smg6,Bclaf1,Smarca5,Ttbk1,Mael,Rbbp8,Camk4,Leo1,Phf2,Fnip1,Sltm,Alkbh5,Akap8l,Setx,Fscb,Zbtb11,Cenpe,Nipbl,Ppp1r2,Ilf3,Tceb2,Rbm12b2,S…
GO:0022402	Cell cycle process	35	784	0.54	2.18e-07	6.66154	10090.ENSMUSP00000005503,10090.ENSMUSP00000006565,10090.ENSMUSP00000007800,10090.ENSMUSP00000010940,10090.ENSMUSP00000020252,10090.ENSMUSP00000020649,10090.ENSMUSP00000022998,10090.ENSMUSP00000023206,10090.ENSMUSP00000025930,10090.ENSMUSP00000029879,10090.ENSMUSP00000030456,10090.ENSMUSP00000030636,10090.ENSMUSP00000031032,10090.ENSMUSP00000031170,10090.ENSMUSP00000034239,10090.ENSMUSP00000035164…	Msh6,Cdc20,Arpp19,Asz1,Sycp3,Rad50,Mtbp,Ercc4,Smc3,Nbn,Nasp,Stmn1,Ppm1g,Cenpc1,Katnb1,Topbp1,Cep72,Slx4,Pcm1,Mael,Rbbp8,Akap8l,Tex14,Cenpe,Nipbl,Espl1,Npm1,Tdrd9,Hspa2,Sycp2,Ddx4,Wdr62,Hfm1,Cdk5rap2,Cep55
GO:0051252	Regulation of rna metabolic process	79	3027	0.3	3.52e-07	6.45346	10090.ENSMUSP00000001620,10090.ENSMUSP00000002444,10090.ENSMUSP00000003818,10090.ENSMUSP00000003876,10090.ENSMUSP00000005620,10090.ENSMUSP00000015800,10090.ENSMUSP00000018909,10090.ENSMUSP00000021824,10090.ENSMUSP00000022682,10090.ENSMUSP00000022793,10090.ENSMUSP00000023813,10090.ENSMUSP00000024657,10090.ENSMUSP00000025241,10090.ENSMUSP00000025243,10090.ENSMUSP00000025840,10090.ENSMUSP00000026032…	Fxr1,Rfx2,Insig2,Brd8,Dnajb1,Hspa8,Fxr2,Nol8,Sorbs3,Acin1,Tarbp2,Phf10,Ercc3,Iws1,Mtl5,Pcgf6,Ncl,BC005624,Rbl1,Murc,Psip1,Sfpq,Rfc1,Pagr1a,Usp2,Ccar2,Ythdc1,Traf3ip1,Bclaf1,Smarca5,Mael,Rbbp8,Camk4,Leo1,Phf2,Fnip1,Sltm,Alkbh5,Akap8l,Setx,Zbtb11,Nipbl,Ilf3,Tceb2,Rbm12b2,Sbno1,Zfp608,Nup98,Cdyl,Npm1,Abce1,Lin9,Ddx20,Srsf2,Tfam,Morc2a,Hsf5,Rbm44,Hdac1,Sirt1,Rere,Usp47,Spag8,Zfp541,Tcf20,Itch,Srsf5,R…
GO:1903046	Meiotic cell cycle process	16	169	0.86	1.03e-06	5.98716	10090.ENSMUSP00000005503,10090.ENSMUSP00000010940,10090.ENSMUSP00000020252,10090.ENSMUSP00000020649,10090.ENSMUSP00000023206,10090.ENSMUSP00000031170,10090.ENSMUSP00000035164,10090.ENSMUSP00000038871,10090.ENSMUSP00000045828,10090.ENSMUSP00000054444,10090.ENSMUSP00000064465,10090.ENSMUSP00000078022,10090.ENSMUSP00000079306,10090.ENSMUSP00000079909,10090.ENSMUSP00000096769,10090.ENSMUSP00000108310	Msh6,Asz1,Sycp3,Rad50,Ercc4,Cenpc1,Topbp1,Slx4,Mael,Tex14,Espl1,Tdrd9,Hspa2,Sycp2,Ddx4,Hfm1
GO:0033554	Cellular response to stress	49	1493	0.4	1.35e-06	5.86967	10090.ENSMUSP00000003818,10090.ENSMUSP00000005503,10090.ENSMUSP00000005620,10090.ENSMUSP00000015800,10090.ENSMUSP00000020252,10090.ENSMUSP00000020365,10090.ENSMUSP00000020649,10090.ENSMUSP00000020931,10090.ENSMUSP00000022590,10090.ENSMUSP00000023206,10090.ENSMUSP00000025241,10090.ENSMUSP00000025930,10090.ENSMUSP00000027421,10090.ENSMUSP00000027933,10090.ENSMUSP00000029879,10090.ENSMUSP00000030623…	Insig2,Msh6,Dnajb1,Hspa8,Sycp3,Mum1,Rad50,Smc6,Dnajc15,Ercc4,Ercc3,Smc3,Trip12,Dtl,Nbn,Sfpq,Rfc1,Aplf,Pagr1a,Nek1,Topbp1,Ccar2,Slx4,Shprh,Bclaf1,Atrip,Mael,Rbbp8,Parp2,Fnip1,Rbbp6,Setx,Txndc2,Nipbl,Npm1,Hspa2,Eya3,Mdc1,Lig3,Morc2a,Hsf5,Hsp90aa1,Hdac1,Sirt1,Usp47,Ccdc13,Ube2j1,Uimc1,Usp10
GO:0050684	Regulation of mrna processing	15	150	0.89	1.57e-06	5.8041	10090.ENSMUSP00000001620,10090.ENSMUSP00000015800,10090.ENSMUSP00000018909,10090.ENSMUSP00000022793,10090.ENSMUSP00000025243,10090.ENSMUSP00000027438,10090.ENSMUSP00000028205,10090.ENSMUSP00000039133,10090.ENSMUSP00000046905,10090.ENSMUSP00000049112,10090.ENSMUSP00000068530,10090.ENSMUSP00000075067,10090.ENSMUSP00000090059,10090.ENSMUSP00000105985,10090.ENSMUSP00000134272	Fxr1,Hspa8,Fxr2,Acin1,Iws1,Ncl,BC005624,Ythdc1,Leo1,Sltm,Nup98,Npm1,Srsf2,Srsf5,Nelfe
GO:0006325	Chromatin organization	29	625	0.55	2.87e-06	5.54212	10090.ENSMUSP00000003876,10090.ENSMUSP00000020252,10090.ENSMUSP00000020365,10090.ENSMUSP00000024657,10090.ENSMUSP00000024779,10090.ENSMUSP00000026032,10090.ENSMUSP00000029170,10090.ENSMUSP00000030456,10090.ENSMUSP00000030623,10090.ENSMUSP00000032918,10090.ENSMUSP00000033839,10090.ENSMUSP00000039422,10090.ENSMUSP00000042792,10090.ENSMUSP00000044361,10090.ENSMUSP00000046905,10090.ENSMUSP00000047308…	Brd8,Sycp3,Mum1,Phf10,Usp49,Pcgf6,Rbl1,Nasp,Sfpq,Pagr1a,Coprs,Shprh,Msl1,Smarca5,Leo1,Phf2,Nipbl,Nap1l4,Cdyl,Npm1,Eya3,Morc2a,Hdac1,Sirt1,Rere,Brd1,Hat1,Uimc1,H1fnt
GO:0000280	Nuclear division	19	273	0.73	3.3e-06	5.48149	10090.ENSMUSP00000006565,10090.ENSMUSP00000010940,10090.ENSMUSP00000020252,10090.ENSMUSP00000023206,10090.ENSMUSP00000031170,10090.ENSMUSP00000034239,10090.ENSMUSP00000035164,10090.ENSMUSP00000038871,10090.ENSMUSP00000045828,10090.ENSMUSP00000051389,10090.ENSMUSP00000054444,10090.ENSMUSP00000057938,10090.ENSMUSP00000059385,10090.ENSMUSP00000064465,10090.ENSMUSP00000078022,10090.ENSMUSP00000079306…	Cdc20,Asz1,Sycp3,Ercc4,Cenpc1,Katnb1,Topbp1,Slx4,Mael,Akap8l,Tex14,Cenpe,Nipbl,Espl1,Tdrd9,Hspa2,Sycp2,Ddx4,Hfm1
GO:0006807	Nitrogen compound metabolic process	121	5878	0.2	3.8e-06	5.42022	10090.ENSMUSP00000003876,10090.ENSMUSP00000005503,10090.ENSMUSP00000006565,10090.ENSMUSP00000010940,10090.ENSMUSP00000013338,10090.ENSMUSP00000015800,10090.ENSMUSP00000015892,10090.ENSMUSP00000020252,10090.ENSMUSP00000020365,10090.ENSMUSP00000020649,10090.ENSMUSP00000020931,10090.ENSMUSP00000021824,10090.ENSMUSP00000022612,10090.ENSMUSP00000022793,10090.ENSMUSP00000023206,10090.ENSMUSP00000023813…	Brd8,Msh6,Cdc20,Asz1,Arih2,Hspa8,Prpf3,Sycp3,Mum1,Rad50,Smc6,Nol8,Pbk,Acin1,Ercc4,Tarbp2,Phf10,Usp49,Ercc3,Iws1,Smc3,Pcgf6,Sf3b1,Trip12,Pask,Dtl,Prpf38b,Nbn,Psip1,Sfpq,Ppm1g,Rfc1,Aplf,Pagr1a,Coprs,Nek1,Ints10,Usp2,Nktr,Topbp1,Tdrd6,Ccar2,Slx4,Ythdc1,Shprh,Psmf1,Smg7,Msl1,Smg6,Smarca5,Ttbk1,Atrip,Mael,Rbbp8,Camk4,Leo1,Phf2,Parp2,Alkbh5,Rbbp6,Acot10,Akap8l,Setx,Ddi1,Tex14,Nipbl,Slbp,Espl1,Ilf3,Tceb…
GO:0071103	DNA conformation change	18	246	0.75	3.8e-06	5.42022	10090.ENSMUSP00000020252,10090.ENSMUSP00000020649,10090.ENSMUSP00000022793,10090.ENSMUSP00000025241,10090.ENSMUSP00000029879,10090.ENSMUSP00000030456,10090.ENSMUSP00000039422,10090.ENSMUSP00000044361,10090.ENSMUSP00000051389,10090.ENSMUSP00000059385,10090.ENSMUSP00000059630,10090.ENSMUSP00000072510,10090.ENSMUSP00000075067,10090.ENSMUSP00000099657,10090.ENSMUSP00000101082,10090.ENSMUSP00000107750…	Sycp3,Rad50,Acin1,Ercc3,Nbn,Nasp,Shprh,Smarca5,Akap8l,Nipbl,Prm3,Nap1l4,Npm1,Hdac1,Sirt1,Hat1,Hfm1,H1fnt
GO:0003006	Developmental process involved in reproduction	37	1005	0.45	7.54e-06	5.12263	10090.ENSMUSP00000002444,10090.ENSMUSP00000008051,10090.ENSMUSP00000010940,10090.ENSMUSP00000020252,10090.ENSMUSP00000023530,10090.ENSMUSP00000023813,10090.ENSMUSP00000025840,10090.ENSMUSP00000029927,10090.ENSMUSP00000034065,10090.ENSMUSP00000035338,10090.ENSMUSP00000039133,10090.ENSMUSP00000045430,10090.ENSMUSP00000045828,10090.ENSMUSP00000049116,10090.ENSMUSP00000051492,10090.ENSMUSP00000054909…	Rfx2,Cabs1,Asz1,Sycp3,Ropn1,Tarbp2,Mtl5,Spaca1,Nek1,Tdrd6,Ythdc1,Catsper1,Mael,Alkbh5,Setx,Txndc2,Nipbl,Prm3,Kiaa1109,Cdyl,Tdrd9,Hspa2,Sycp2,Eif4g3,Ddx20,Ddx4,Sirt1,Cep131,Mast2,Spag8,Zfp541,Tdrd1,Hfm1,Cabyr,Ube2j1,Fsip2,H1fnt
GO:0033044	Regulation of chromosome organization	21	363	0.65	1.01e-05	4.99568	10090.ENSMUSP00000020649,10090.ENSMUSP00000023206,10090.ENSMUSP00000025243,10090.ENSMUSP00000027421,10090.ENSMUSP00000029879,10090.ENSMUSP00000030623,10090.ENSMUSP00000038871,10090.ENSMUSP00000041241,10090.ENSMUSP00000043555,10090.ENSMUSP00000047308,10090.ENSMUSP00000051389,10090.ENSMUSP00000054444,10090.ENSMUSP00000057938,10090.ENSMUSP00000059385,10090.ENSMUSP00000091087,10090.ENSMUSP00000101082…	Rad50,Ercc4,Iws1,Trip12,Nbn,Sfpq,Slx4,Smg7,Smg6,Phf2,Akap8l,Tex14,Cenpe,Nipbl,Morc2a,Sirt1,Hnrnpc,Mphosph8,Cdk5rap2,H1fnt,Nelfe
GO:0010605	Negative regulation of macromolecule metabolic process	68	2646	0.3	1.11e-05	4.95468	10090.ENSMUSP00000001620,10090.ENSMUSP00000005503,10090.ENSMUSP00000005620,10090.ENSMUSP00000007800,10090.ENSMUSP00000010940,10090.ENSMUSP00000015800,10090.ENSMUSP00000018909,10090.ENSMUSP00000020649,10090.ENSMUSP00000022612,10090.ENSMUSP00000022682,10090.ENSMUSP00000022793,10090.ENSMUSP00000023206,10090.ENSMUSP00000023813,10090.ENSMUSP00000024657,10090.ENSMUSP00000026032,10090.ENSMUSP00000027421…	Fxr1,Msh6,Dnajb1,Arpp19,Asz1,Hspa8,Fxr2,Rad50,Pbk,Sorbs3,Acin1,Ercc4,Tarbp2,Phf10,Pcgf6,Trip12,Ncl,Pask,Rbl1,Nbn,Sfpq,Rfc1,Usp2,Ccar2,Slx4,Psmf1,Smg7,Traf3ip1,Smg6,Bclaf1,Smarca5,Ttbk1,Mael,Rbbp8,Fnip1,Fscb,Nipbl,Ppp1r2,Ilf3,Zfp608,Cdyl,Npm1,Tdrd9,Ppm1b,Abce1,Xpo5,Adnp,Ddx20,Lig3,Grb10,Morc2a,Ddx4,Hdac1,Sirt1,Rere,Usp47,Srcin1,Itch,Tdrd1,Hnrnpc,Hat1,Zfp318,Mphosph8,Ube2j1,Uimc1,Mycbp2,H1fnt,Nelfe
GO:0043484	Regulation of rna splicing	14	152	0.85	1.11e-05	4.95468	10090.ENSMUSP00000001620,10090.ENSMUSP00000015800,10090.ENSMUSP00000018909,10090.ENSMUSP00000022793,10090.ENSMUSP00000027438,10090.ENSMUSP00000028205,10090.ENSMUSP00000039133,10090.ENSMUSP00000051492,10090.ENSMUSP00000066311,10090.ENSMUSP00000068530,10090.ENSMUSP00000075067,10090.ENSMUSP00000090059,10090.ENSMUSP00000105985,10090.ENSMUSP00000130023	Fxr1,Hspa8,Fxr2,Acin1,Ncl,BC005624,Ythdc1,Setx,Rbm12b2,Nup98,Npm1,Srsf2,Srsf5,Hnrnpf
GO:0010468	Regulation of gene expression	91	4041	0.24	1.25e-05	4.90309	10090.ENSMUSP00000001620,10090.ENSMUSP00000002444,10090.ENSMUSP00000003818,10090.ENSMUSP00000003876,10090.ENSMUSP00000005620,10090.ENSMUSP00000010940,10090.ENSMUSP00000015800,10090.ENSMUSP00000018909,10090.ENSMUSP00000022682,10090.ENSMUSP00000022793,10090.ENSMUSP00000023813,10090.ENSMUSP00000024657,10090.ENSMUSP00000025241,10090.ENSMUSP00000025243,10090.ENSMUSP00000025830,10090.ENSMUSP00000025840…	Fxr1,Rfx2,Insig2,Brd8,Dnajb1,Asz1,Hspa8,Fxr2,Sorbs3,Acin1,Tarbp2,Phf10,Ercc3,Iws1,Apba1,Mtl5,Pcgf6,Ncl,BC005624,Rbl1,Murc,Psip1,Sfpq,Rfc1,Pagr1a,Usp2,Ccar2,Ythdc1,Smg7,Traf3ip1,Smg6,Bclaf1,Smarca5,Ttbk1,Mael,Camk4,Leo1,Phf2,Fnip1,Sltm,Alkbh5,Akap8l,Setx,Zbtb11,Nipbl,Ilf3,Tceb2,Rbm12b2,Sbno1,Zfp608,Nup98,Cdyl,Npm1,Tdrd9,Ppm1b,Eif4g3,Lin9,Xpo5,Adnp,Ddx20,Srsf2,Tfam,Morc2a,Hsf5,Ddx4,Hdac1,Sirt1,Rere…
GO:0140013	Meiotic nuclear division	14	154	0.85	1.25e-05	4.90309	10090.ENSMUSP00000010940,10090.ENSMUSP00000020252,10090.ENSMUSP00000023206,10090.ENSMUSP00000031170,10090.ENSMUSP00000035164,10090.ENSMUSP00000038871,10090.ENSMUSP00000045828,10090.ENSMUSP00000054444,10090.ENSMUSP00000064465,10090.ENSMUSP00000078022,10090.ENSMUSP00000079306,10090.ENSMUSP00000079909,10090.ENSMUSP00000096769,10090.ENSMUSP00000108310	Asz1,Sycp3,Ercc4,Cenpc1,Topbp1,Slx4,Mael,Tex14,Espl1,Tdrd9,Hspa2,Sycp2,Ddx4,Hfm1
GO:0007018	Microtubule-based movement	20	336	0.66	1.27e-05	4.8962	10090.ENSMUSP00000015800,10090.ENSMUSP00000023530,10090.ENSMUSP00000030623,10090.ENSMUSP00000034239,10090.ENSMUSP00000034791,10090.ENSMUSP00000039709,10090.ENSMUSP00000042391,10090.ENSMUSP00000045430,10090.ENSMUSP00000045480,10090.ENSMUSP00000050962,10090.ENSMUSP00000054909,10090.ENSMUSP00000057938,10090.ENSMUSP00000059630,10090.ENSMUSP00000096487,10090.ENSMUSP00000096769,10090.ENSMUSP00000101834…	Hspa8,Ropn1,Sfpq,Katnb1,Lca5,Pcm1,Traf3ip1,Catsper1,Dync1li2,Akap4,Txndc2,Cenpe,Prm3,Smcp,Ddx4,Cep131,Kif24,Wdr66,Fsip2,Spag17
GO:0007017	Microtubule-based process	30	722	0.51	1.31e-05	4.88273	10090.ENSMUSP00000006565,10090.ENSMUSP00000015800,10090.ENSMUSP00000023530,10090.ENSMUSP00000030623,10090.ENSMUSP00000030636,10090.ENSMUSP00000033490,10090.ENSMUSP00000034239,10090.ENSMUSP00000034791,10090.ENSMUSP00000037788,10090.ENSMUSP00000039709,10090.ENSMUSP00000042391,10090.ENSMUSP00000045430,10090.ENSMUSP00000045480,10090.ENSMUSP00000050962,10090.ENSMUSP00000054909,10090.ENSMUSP00000057938…	Cdc20,Hspa8,Ropn1,Sfpq,Stmn1,Ccdc120,Katnb1,Lca5,Cep72,Pcm1,Traf3ip1,Catsper1,Dync1li2,Akap4,Txndc2,Cenpe,Prm3,Espl1,Npm1,Smcp,Ddx4,Cep131,Kif24,Wdr62,Wdr66,Ccdc13,Cdk5rap2,Fsip2,Mark2,Spag17
GO:0006323	DNA packaging	14	158	0.83	1.55e-05	4.80967	10090.ENSMUSP00000020252,10090.ENSMUSP00000022793,10090.ENSMUSP00000030456,10090.ENSMUSP00000039422,10090.ENSMUSP00000044361,10090.ENSMUSP00000051389,10090.ENSMUSP00000059385,10090.ENSMUSP00000059630,10090.ENSMUSP00000072510,10090.ENSMUSP00000075067,10090.ENSMUSP00000099657,10090.ENSMUSP00000101082,10090.ENSMUSP00000107750,10090.ENSMUSP00000127616	Sycp3,Acin1,Nasp,Shprh,Smarca5,Akap8l,Nipbl,Prm3,Nap1l4,Npm1,Hdac1,Sirt1,Hat1,H1fnt
GO:0061982	Meiosis i cell cycle process	12	110	0.92	1.73e-05	4.76195	10090.ENSMUSP00000005503,10090.ENSMUSP00000020252,10090.ENSMUSP00000023206,10090.ENSMUSP00000031170,10090.ENSMUSP00000035164,10090.ENSMUSP00000038871,10090.ENSMUSP00000045828,10090.ENSMUSP00000064465,10090.ENSMUSP00000078022,10090.ENSMUSP00000079306,10090.ENSMUSP00000096769,10090.ENSMUSP00000108310	Msh6,Sycp3,Ercc4,Cenpc1,Topbp1,Slx4,Mael,Espl1,Tdrd9,Hspa2,Ddx4,Hfm1
GO:0000398	mRNA splicing, via spliceosome	15	191	0.78	2.18e-05	4.66154	10090.ENSMUSP00000015892,10090.ENSMUSP00000024779,10090.ENSMUSP00000027127,10090.ENSMUSP00000030207,10090.ENSMUSP00000030623,10090.ENSMUSP00000035338,10090.ENSMUSP00000039133,10090.ENSMUSP00000051492,10090.ENSMUSP00000066797,10090.ENSMUSP00000075655,10090.ENSMUSP00000085993,10090.ENSMUSP00000088176,10090.ENSMUSP00000090059,10090.ENSMUSP00000105985,10090.ENSMUSP00000107237	Prpf3,Usp49,Sf3b1,Psip1,Sfpq,Tdrd6,Ythdc1,Setx,Rsrc1,Prpf40a,Srrm2,Ddx20,Srsf2,Srsf5,Hnrnpc
GO:0007281	Germ cell development	18	285	0.69	2.33e-05	4.63264	10090.ENSMUSP00000002444,10090.ENSMUSP00000010940,10090.ENSMUSP00000020252,10090.ENSMUSP00000023530,10090.ENSMUSP00000023813,10090.ENSMUSP00000029927,10090.ENSMUSP00000035338,10090.ENSMUSP00000039133,10090.ENSMUSP00000074707,10090.ENSMUSP00000079306,10090.ENSMUSP00000088176,10090.ENSMUSP00000101834,10090.ENSMUSP00000107231,10090.ENSMUSP00000108310,10090.ENSMUSP00000111523,10090.ENSMUSP00000118333…	Rfx2,Asz1,Sycp3,Ropn1,Tarbp2,Spaca1,Tdrd6,Ythdc1,Cdyl,Hspa2,Ddx20,Cep131,Tdrd1,Hfm1,Cabyr,Ube2j1,Fsip2,H1fnt
GO:0044238	Primary metabolic process	125	6369	0.18	2.4e-05	4.61979	10090.ENSMUSP00000003818,10090.ENSMUSP00000003876,10090.ENSMUSP00000005003,10090.ENSMUSP00000005503,10090.ENSMUSP00000006565,10090.ENSMUSP00000010940,10090.ENSMUSP00000013338,10090.ENSMUSP00000015800,10090.ENSMUSP00000015892,10090.ENSMUSP00000020252,10090.ENSMUSP00000020365,10090.ENSMUSP00000020649,10090.ENSMUSP00000020931,10090.ENSMUSP00000021824,10090.ENSMUSP00000022612,10090.ENSMUSP00000022793…	Insig2,Brd8,Lbr,Msh6,Cdc20,Asz1,Arih2,Hspa8,Prpf3,Sycp3,Mum1,Rad50,Smc6,Nol8,Pbk,Acin1,Ercc4,Tarbp2,Phf10,Usp49,Ercc3,Iws1,Smc3,Pcgf6,Sf3b1,Trip12,Pask,Dtl,Prpf38b,Nbn,Psip1,Sfpq,Ppm1g,Rfc1,Aplf,Pagr1a,Coprs,Nek1,Ints10,Usp2,Nktr,Topbp1,Tdrd6,Ccar2,Slx4,Ythdc1,Shprh,Psmf1,Smg7,Msl1,Smg6,Smarca5,Ttbk1,Atrip,Mael,Rbbp8,Camk4,Leo1,Phf2,Parp2,Alkbh5,Rbbp6,Acot10,Akap8l,Setx,Ddi1,Tex14,Nipbl,Ppp1r2,Ki…
GO:0009892	Negative regulation of metabolic process	71	2895	0.28	2.46e-05	4.60906	10090.ENSMUSP00000001620,10090.ENSMUSP00000003818,10090.ENSMUSP00000005503,10090.ENSMUSP00000005620,10090.ENSMUSP00000007800,10090.ENSMUSP00000010940,10090.ENSMUSP00000015800,10090.ENSMUSP00000018909,10090.ENSMUSP00000020649,10090.ENSMUSP00000022590,10090.ENSMUSP00000022612,10090.ENSMUSP00000022682,10090.ENSMUSP00000022793,10090.ENSMUSP00000023206,10090.ENSMUSP00000023813,10090.ENSMUSP00000024657…	Fxr1,Insig2,Msh6,Dnajb1,Arpp19,Asz1,Hspa8,Fxr2,Rad50,Dnajc15,Pbk,Sorbs3,Acin1,Ercc4,Tarbp2,Phf10,Pcgf6,Trip12,Ncl,Pask,Rbl1,Nbn,Sfpq,Rfc1,Usp2,Ccar2,Slx4,Psmf1,Smg7,Traf3ip1,Smg6,Bclaf1,Smarca5,Ttbk1,Mael,Rbbp8,Fnip1,Fscb,Nipbl,Ppp1r2,Ilf3,Zfp608,Cdyl,Npm1,Tdrd9,Ppm1b,Abce1,Xpo5,Adnp,Ddx20,Lig3,Grb10,Morc2a,Ddx4,Hdac1,Sirt1,Rere,Usp47,Srcin1,Itch,Tdrd1,Hnrnpc,Hat1,Zfp318,Mphosph8,Ube2j1,Uimc1,Myc…
GO:1903311	Regulation of mrna metabolic process	17	255	0.71	2.48e-05	4.60555	10090.ENSMUSP00000001620,10090.ENSMUSP00000015800,10090.ENSMUSP00000018909,10090.ENSMUSP00000022793,10090.ENSMUSP00000025243,10090.ENSMUSP00000027438,10090.ENSMUSP00000028205,10090.ENSMUSP00000039133,10090.ENSMUSP00000046905,10090.ENSMUSP00000049112,10090.ENSMUSP00000049116,10090.ENSMUSP00000068530,10090.ENSMUSP00000075067,10090.ENSMUSP00000090059,10090.ENSMUSP00000105985,10090.ENSMUSP00000107237…	Fxr1,Hspa8,Fxr2,Acin1,Iws1,Ncl,BC005624,Ythdc1,Leo1,Sltm,Alkbh5,Nup98,Npm1,Srsf2,Srsf5,Hnrnpc,Nelfe
GO:0006310	DNA recombination	15	201	0.76	3.63e-05	4.44009	10090.ENSMUSP00000005503,10090.ENSMUSP00000020252,10090.ENSMUSP00000020649,10090.ENSMUSP00000020931,10090.ENSMUSP00000023206,10090.ENSMUSP00000029879,10090.ENSMUSP00000030623,10090.ENSMUSP00000032918,10090.ENSMUSP00000035164,10090.ENSMUSP00000038871,10090.ENSMUSP00000046255,10090.ENSMUSP00000051492,10090.ENSMUSP00000059385,10090.ENSMUSP00000090525,10090.ENSMUSP00000108310	Msh6,Sycp3,Rad50,Smc6,Ercc4,Nbn,Sfpq,Pagr1a,Topbp1,Slx4,Rbbp8,Setx,Nipbl,Lig3,Hfm1
GO:0007059	Chromosome segregation	17	263	0.7	3.65e-05	4.43771	10090.ENSMUSP00000006565,10090.ENSMUSP00000020252,10090.ENSMUSP00000023206,10090.ENSMUSP00000025930,10090.ENSMUSP00000027494,10090.ENSMUSP00000031170,10090.ENSMUSP00000034239,10090.ENSMUSP00000038871,10090.ENSMUSP00000045828,10090.ENSMUSP00000051389,10090.ENSMUSP00000054444,10090.ENSMUSP00000057938,10090.ENSMUSP00000059385,10090.ENSMUSP00000064465,10090.ENSMUSP00000108310,10090.ENSMUSP00000117847…	Cdc20,Sycp3,Ercc4,Smc3,Ppp1r7,Cenpc1,Katnb1,Slx4,Mael,Akap8l,Tex14,Cenpe,Nipbl,Espl1,Hfm1,Cdca2,Cdk5rap2
GO:0009987	Cellular process	214	13330	0.09	6.67e-05	4.17587	10090.ENSMUSP00000001279,10090.ENSMUSP00000001620,10090.ENSMUSP00000002444,10090.ENSMUSP00000002445,10090.ENSMUSP00000003818,10090.ENSMUSP00000003876,10090.ENSMUSP00000005003,10090.ENSMUSP00000005503,10090.ENSMUSP00000005620,10090.ENSMUSP00000006565,10090.ENSMUSP00000007800,10090.ENSMUSP00000010940,10090.ENSMUSP00000013338,10090.ENSMUSP00000015800,10090.ENSMUSP00000015892,10090.ENSMUSP00000020252…	Lsr,Fxr1,Rfx2,Ranbp3,Insig2,Brd8,Lbr,Msh6,Dnajb1,Cdc20,Arpp19,Asz1,Arih2,Hspa8,Prpf3,Sycp3,Mum1,Rad50,Smc6,Dcdc2c,Nol8,Dnajc15,Pbk,Sorbs3,Acin1,Mtbp,Ercc4,Slc35a5,Ropn1,Tarbp2,Phf10,Usp49,Ercc3,Iws1,Apba1,Mtl5,Stip1,Smc3,Pcgf6,Sf3b1,Trip12,Ncl,Pask,Ppp1r7,Dtl,Api5,Rbl1,Prpf38b,Nbn,Spaca1,Murc,Psip1,Nasp,Sfpq,Stmn1,Nudc,Gnl2,Rgs12,Ppm1g,Rfc1,Cenpc1,Aplf,Pagr1a,Ccdc120,Coprs,Nek1,Katnb1,Ints10,Usp2…
GO:0045934	Negative regulation of nucleobase-containing compound metabolic process	43	1415	0.37	6.71e-05	4.17328	10090.ENSMUSP00000005503,10090.ENSMUSP00000005620,10090.ENSMUSP00000015800,10090.ENSMUSP00000020649,10090.ENSMUSP00000022682,10090.ENSMUSP00000022793,10090.ENSMUSP00000023206,10090.ENSMUSP00000024657,10090.ENSMUSP00000026032,10090.ENSMUSP00000027421,10090.ENSMUSP00000029170,10090.ENSMUSP00000029879,10090.ENSMUSP00000030623,10090.ENSMUSP00000031092,10090.ENSMUSP00000034508,10090.ENSMUSP00000036924…	Msh6,Dnajb1,Hspa8,Rad50,Sorbs3,Acin1,Ercc4,Phf10,Pcgf6,Trip12,Rbl1,Nbn,Sfpq,Rfc1,Usp2,Ccar2,Slx4,Traf3ip1,Smg6,Bclaf1,Smarca5,Mael,Rbbp8,Fnip1,Nipbl,Ilf3,Zfp608,Cdyl,Npm1,Abce1,Ddx20,Lig3,Hdac1,Sirt1,Rere,Usp47,Hnrnpc,Hat1,Zfp318,Mphosph8,Uimc1,H1fnt,Nelfe
GO:0010556	Regulation of macromolecule biosynthetic process	76	3294	0.25	7.89e-05	4.10292	10090.ENSMUSP00000001620,10090.ENSMUSP00000002444,10090.ENSMUSP00000003818,10090.ENSMUSP00000003876,10090.ENSMUSP00000005620,10090.ENSMUSP00000015800,10090.ENSMUSP00000018909,10090.ENSMUSP00000022682,10090.ENSMUSP00000023813,10090.ENSMUSP00000024657,10090.ENSMUSP00000025241,10090.ENSMUSP00000025840,10090.ENSMUSP00000025930,10090.ENSMUSP00000026032,10090.ENSMUSP00000027438,10090.ENSMUSP00000027493…	Fxr1,Rfx2,Insig2,Brd8,Dnajb1,Hspa8,Fxr2,Sorbs3,Tarbp2,Phf10,Ercc3,Mtl5,Smc3,Pcgf6,Ncl,Pask,Rbl1,Murc,Psip1,Sfpq,Rfc1,Pagr1a,Usp2,Ccar2,Smg7,Traf3ip1,Smg6,Bclaf1,Smarca5,Mael,Rbbp8,Camk4,Leo1,Phf2,Fnip1,Sltm,Rbbp6,Akap8l,Setx,Zbtb11,Nipbl,Ilf3,Tceb2,Sbno1,Zfp608,Nup98,Cdyl,Npm1,Eif4g3,Lin9,Ddx20,Tfam,Lig3,Grb10,Morc2a,Hsf5,Hsp90aa1,Hdac1,Sirt1,Rere,Usp47,Spag8,Zfp541,Tcf20,Itch,Ralgapa1,Hnrnpc,Hat…
GO:0010467	Gene expression	49	1743	0.34	8.24e-05	4.08407	10090.ENSMUSP00000015800,10090.ENSMUSP00000015892,10090.ENSMUSP00000021824,10090.ENSMUSP00000022793,10090.ENSMUSP00000023813,10090.ENSMUSP00000024779,10090.ENSMUSP00000025241,10090.ENSMUSP00000025243,10090.ENSMUSP00000027127,10090.ENSMUSP00000029480,10090.ENSMUSP00000030207,10090.ENSMUSP00000030623,10090.ENSMUSP00000034328,10090.ENSMUSP00000035338,10090.ENSMUSP00000036924,10090.ENSMUSP00000039133…	Hspa8,Prpf3,Nol8,Acin1,Tarbp2,Usp49,Ercc3,Iws1,Sf3b1,Prpf38b,Psip1,Sfpq,Ints10,Tdrd6,Ccar2,Ythdc1,Smarca5,Leo1,Alkbh5,Rbbp6,Akap8l,Setx,Slbp,Tceb2,Glrx3,Rsrc1,Cpsf3,Npm1,Prpf40a,Prpf4b,U2surp,Abce1,Eif4g3,Rplp2,Lin9,Srrm2,Ddx20,Rbm27,Srsf2,Tfam,Grb10,Sugp2,Sirt1,Srsf5,Hnrnpc,Hnrnpf,Cd2bp2,Lin52,Tcof1
GO:2001251	Negative regulation of chromosome organization	12	132	0.85	8.67e-05	4.06198	10090.ENSMUSP00000020649,10090.ENSMUSP00000023206,10090.ENSMUSP00000027421,10090.ENSMUSP00000029879,10090.ENSMUSP00000038871,10090.ENSMUSP00000043555,10090.ENSMUSP00000047308,10090.ENSMUSP00000054444,10090.ENSMUSP00000057938,10090.ENSMUSP00000101082,10090.ENSMUSP00000107237,10090.ENSMUSP00000127616	Rad50,Ercc4,Trip12,Nbn,Slx4,Smg6,Phf2,Tex14,Cenpe,Sirt1,Hnrnpc,H1fnt
GO:0007127	Meiosis i	11	108	0.89	9.32e-05	4.03058	10090.ENSMUSP00000020252,10090.ENSMUSP00000023206,10090.ENSMUSP00000031170,10090.ENSMUSP00000035164,10090.ENSMUSP00000038871,10090.ENSMUSP00000045828,10090.ENSMUSP00000064465,10090.ENSMUSP00000078022,10090.ENSMUSP00000079306,10090.ENSMUSP00000096769,10090.ENSMUSP00000108310	Sycp3,Ercc4,Cenpc1,Topbp1,Slx4,Mael,Espl1,Tdrd9,Hspa2,Ddx4,Hfm1
GO:0048024	Regulation of mrna splicing, via spliceosome	11	111	0.88	0.00012	3.92082	10090.ENSMUSP00000001620,10090.ENSMUSP00000015800,10090.ENSMUSP00000018909,10090.ENSMUSP00000022793,10090.ENSMUSP00000027438,10090.ENSMUSP00000028205,10090.ENSMUSP00000039133,10090.ENSMUSP00000068530,10090.ENSMUSP00000075067,10090.ENSMUSP00000090059,10090.ENSMUSP00000105985	Fxr1,Hspa8,Fxr2,Acin1,Ncl,BC005624,Ythdc1,Nup98,Npm1,Srsf2,Srsf5
GO:0044260	Cellular macromolecule metabolic process	89	4161	0.22	0.00013	3.88606	10090.ENSMUSP00000003876,10090.ENSMUSP00000005503,10090.ENSMUSP00000006565,10090.ENSMUSP00000010940,10090.ENSMUSP00000013338,10090.ENSMUSP00000015800,10090.ENSMUSP00000020252,10090.ENSMUSP00000020365,10090.ENSMUSP00000020649,10090.ENSMUSP00000020931,10090.ENSMUSP00000022612,10090.ENSMUSP00000023206,10090.ENSMUSP00000024657,10090.ENSMUSP00000024779,10090.ENSMUSP00000025241,10090.ENSMUSP00000025930…	Brd8,Msh6,Cdc20,Asz1,Arih2,Hspa8,Sycp3,Mum1,Rad50,Smc6,Pbk,Ercc4,Phf10,Usp49,Ercc3,Smc3,Pcgf6,Trip12,Pask,Dtl,Nbn,Nasp,Sfpq,Ppm1g,Rfc1,Aplf,Pagr1a,Coprs,Nek1,Usp2,Nktr,Topbp1,Slx4,Shprh,Psmf1,Smg7,Msl1,Smg6,Smarca5,Ttbk1,Atrip,Mael,Rbbp8,Camk4,Leo1,Phf2,Parp2,Rbbp6,Setx,Ddi1,Tex14,Nipbl,Ppp1r2,Ilf3,Tceb2,Rsrc1,Cdyl,Npm1,Prpf4b,Tdrd9,Ppm1b,Abce1,Eya3,Mdc1,Eif4g3,Rplp2,Lin9,Tfam,Lig3,Grb10,Hsp90aa1…
GO:0044237	Cellular metabolic process	123	6445	0.17	0.00014	3.85387	10090.ENSMUSP00000003818,10090.ENSMUSP00000003876,10090.ENSMUSP00000005503,10090.ENSMUSP00000006565,10090.ENSMUSP00000010940,10090.ENSMUSP00000013338,10090.ENSMUSP00000015800,10090.ENSMUSP00000015892,10090.ENSMUSP00000020252,10090.ENSMUSP00000020365,10090.ENSMUSP00000020649,10090.ENSMUSP00000020931,10090.ENSMUSP00000021824,10090.ENSMUSP00000022612,10090.ENSMUSP00000022793,10090.ENSMUSP00000023206…	Insig2,Brd8,Msh6,Cdc20,Asz1,Arih2,Hspa8,Prpf3,Sycp3,Mum1,Rad50,Smc6,Nol8,Pbk,Acin1,Ercc4,Tarbp2,Phf10,Usp49,Ercc3,Iws1,Smc3,Pcgf6,Sf3b1,Trip12,Pask,Dtl,Prpf38b,Nbn,Psip1,Nasp,Sfpq,Ppm1g,Rfc1,Aplf,Pagr1a,Coprs,Nek1,Ints10,Usp2,Nktr,Topbp1,Tdrd6,Ccar2,Slx4,Ythdc1,Shprh,Psmf1,Smg7,Msl1,Smg6,Smarca5,Ttbk1,Atrip,Mael,Rbbp8,Camk4,Leo1,Phf2,Parp2,Alkbh5,Rbbp6,Acot10,Akap8l,Setx,Ddi1,Tex14,Nipbl,Ppp1r2,S…
GO:0051052	Regulation of dna metabolic process	19	365	0.6	0.00014	3.85387	10090.ENSMUSP00000005503,10090.ENSMUSP00000020649,10090.ENSMUSP00000023206,10090.ENSMUSP00000027421,10090.ENSMUSP00000029879,10090.ENSMUSP00000032130,10090.ENSMUSP00000032918,10090.ENSMUSP00000038871,10090.ENSMUSP00000041241,10090.ENSMUSP00000043555,10090.ENSMUSP00000075067,10090.ENSMUSP00000080425,10090.ENSMUSP00000090525,10090.ENSMUSP00000091921,10090.ENSMUSP00000101082,10090.ENSMUSP00000107237…	Msh6,Rad50,Ercc4,Trip12,Nbn,Aplf,Pagr1a,Slx4,Smg7,Smg6,Npm1,Eya3,Lig3,Hsp90aa1,Sirt1,Hnrnpc,Mphosph8,Uimc1,H1fnt
GO:0006302	Double-strand break repair	13	172	0.77	0.00019	3.72125	10090.ENSMUSP00000020649,10090.ENSMUSP00000023206,10090.ENSMUSP00000029879,10090.ENSMUSP00000030623,10090.ENSMUSP00000032130,10090.ENSMUSP00000038871,10090.ENSMUSP00000046255,10090.ENSMUSP00000048877,10090.ENSMUSP00000051492,10090.ENSMUSP00000059385,10090.ENSMUSP00000080425,10090.ENSMUSP00000090525,10090.ENSMUSP00000122196	Rad50,Ercc4,Nbn,Sfpq,Aplf,Slx4,Rbbp8,Parp2,Setx,Nipbl,Eya3,Lig3,Uimc1
GO:0031326	Regulation of cellular biosynthetic process	77	3448	0.24	0.0002	3.69897	10090.ENSMUSP00000001620,10090.ENSMUSP00000002444,10090.ENSMUSP00000003818,10090.ENSMUSP00000003876,10090.ENSMUSP00000005620,10090.ENSMUSP00000007800,10090.ENSMUSP00000015800,10090.ENSMUSP00000018909,10090.ENSMUSP00000022682,10090.ENSMUSP00000023813,10090.ENSMUSP00000024657,10090.ENSMUSP00000025241,10090.ENSMUSP00000025840,10090.ENSMUSP00000025930,10090.ENSMUSP00000026032,10090.ENSMUSP00000027438…	Fxr1,Rfx2,Insig2,Brd8,Dnajb1,Arpp19,Hspa8,Fxr2,Sorbs3,Tarbp2,Phf10,Ercc3,Mtl5,Smc3,Pcgf6,Ncl,Pask,Rbl1,Murc,Psip1,Sfpq,Rfc1,Pagr1a,Usp2,Ccar2,Smg7,Traf3ip1,Smg6,Bclaf1,Smarca5,Mael,Rbbp8,Camk4,Leo1,Phf2,Fnip1,Sltm,Rbbp6,Akap8l,Setx,Zbtb11,Nipbl,Ilf3,Tceb2,Sbno1,Zfp608,Nup98,Cdyl,Npm1,Eif4g3,Lin9,Ddx20,Tfam,Lig3,Grb10,Morc2a,Hsf5,Hsp90aa1,Hdac1,Sirt1,Rere,Usp47,Spag8,Zfp541,Tcf20,Itch,Ralgapa1,Hnr…
GO:0098813	Nuclear chromosome segregation	14	205	0.72	0.00021	3.67778	10090.ENSMUSP00000006565,10090.ENSMUSP00000020252,10090.ENSMUSP00000023206,10090.ENSMUSP00000025930,10090.ENSMUSP00000031170,10090.ENSMUSP00000034239,10090.ENSMUSP00000038871,10090.ENSMUSP00000045828,10090.ENSMUSP00000051389,10090.ENSMUSP00000054444,10090.ENSMUSP00000057938,10090.ENSMUSP00000059385,10090.ENSMUSP00000064465,10090.ENSMUSP00000108310	Cdc20,Sycp3,Ercc4,Smc3,Cenpc1,Katnb1,Slx4,Mael,Akap8l,Tex14,Cenpe,Nipbl,Espl1,Hfm1
GO:2000112	Regulation of cellular macromolecule biosynthetic process	73	3203	0.24	0.00021	3.67778	10090.ENSMUSP00000001620,10090.ENSMUSP00000002444,10090.ENSMUSP00000003818,10090.ENSMUSP00000003876,10090.ENSMUSP00000005620,10090.ENSMUSP00000015800,10090.ENSMUSP00000018909,10090.ENSMUSP00000022682,10090.ENSMUSP00000023813,10090.ENSMUSP00000024657,10090.ENSMUSP00000025241,10090.ENSMUSP00000025840,10090.ENSMUSP00000025930,10090.ENSMUSP00000026032,10090.ENSMUSP00000027438,10090.ENSMUSP00000027493…	Fxr1,Rfx2,Insig2,Brd8,Dnajb1,Hspa8,Fxr2,Sorbs3,Tarbp2,Phf10,Ercc3,Mtl5,Smc3,Pcgf6,Ncl,Pask,Rbl1,Murc,Psip1,Sfpq,Rfc1,Pagr1a,Usp2,Ccar2,Smg7,Traf3ip1,Smg6,Bclaf1,Smarca5,Mael,Camk4,Leo1,Phf2,Fnip1,Sltm,Rbbp6,Akap8l,Setx,Zbtb11,Nipbl,Ilf3,Tceb2,Sbno1,Zfp608,Npm1,Eif4g3,Lin9,Ddx20,Tfam,Lig3,Grb10,Morc2a,Hsf5,Hsp90aa1,Hdac1,Sirt1,Rere,Usp47,Spag8,Zfp541,Tcf20,Itch,Ralgapa1,Hnrnpc,Hat1,Zfp318,Mphosph8…
GO:0009889	Regulation of biosynthetic process	78	3526	0.23	0.00024	3.61979	10090.ENSMUSP00000001620,10090.ENSMUSP00000002444,10090.ENSMUSP00000003818,10090.ENSMUSP00000003876,10090.ENSMUSP00000005620,10090.ENSMUSP00000007800,10090.ENSMUSP00000015800,10090.ENSMUSP00000018909,10090.ENSMUSP00000022682,10090.ENSMUSP00000023813,10090.ENSMUSP00000024657,10090.ENSMUSP00000025241,10090.ENSMUSP00000025840,10090.ENSMUSP00000025930,10090.ENSMUSP00000026032,10090.ENSMUSP00000027438…	Fxr1,Rfx2,Insig2,Brd8,Dnajb1,Arpp19,Hspa8,Fxr2,Sorbs3,Tarbp2,Phf10,Ercc3,Mtl5,Smc3,Pcgf6,Ncl,Pask,Rbl1,Murc,Psip1,Sfpq,Rfc1,Pagr1a,Usp2,Ccar2,Smg7,Traf3ip1,Smg6,Bclaf1,Smarca5,Suco,Mael,Rbbp8,Camk4,Leo1,Phf2,Fnip1,Sltm,Rbbp6,Akap8l,Setx,Zbtb11,Nipbl,Ilf3,Tceb2,Sbno1,Zfp608,Nup98,Cdyl,Npm1,Eif4g3,Lin9,Ddx20,Tfam,Lig3,Grb10,Morc2a,Hsf5,Hsp90aa1,Hdac1,Sirt1,Rere,Usp47,Spag8,Zfp541,Tcf20,Itch,Ralgapa…
GO:0030317	Flagellated sperm motility	10	97	0.9	0.00025	3.60206	10090.ENSMUSP00000023530,10090.ENSMUSP00000045430,10090.ENSMUSP00000050962,10090.ENSMUSP00000054909,10090.ENSMUSP00000059630,10090.ENSMUSP00000096487,10090.ENSMUSP00000096769,10090.ENSMUSP00000101834,10090.ENSMUSP00000113309,10090.ENSMUSP00000120314	Ropn1,Catsper1,Akap4,Txndc2,Prm3,Smcp,Ddx4,Cep131,Wdr66,Fsip2
GO:0048515	Spermatid differentiation	13	181	0.74	0.00029	3.5376	10090.ENSMUSP00000002444,10090.ENSMUSP00000020252,10090.ENSMUSP00000023530,10090.ENSMUSP00000023813,10090.ENSMUSP00000029927,10090.ENSMUSP00000074707,10090.ENSMUSP00000079306,10090.ENSMUSP00000101834,10090.ENSMUSP00000102095,10090.ENSMUSP00000111523,10090.ENSMUSP00000118333,10090.ENSMUSP00000120314,10090.ENSMUSP00000127616	Rfx2,Sycp3,Ropn1,Tarbp2,Spaca1,Cdyl,Hspa2,Cep131,Mast2,Cabyr,Ube2j1,Fsip2,H1fnt
GO:0071897	DNA biosynthetic process	9	77	0.95	0.00032	3.49485	10090.ENSMUSP00000020252,10090.ENSMUSP00000020649,10090.ENSMUSP00000027933,10090.ENSMUSP00000041241,10090.ENSMUSP00000043555,10090.ENSMUSP00000082959,10090.ENSMUSP00000090525,10090.ENSMUSP00000091921,10090.ENSMUSP00000101082	Sycp3,Rad50,Dtl,Smg7,Smg6,Lin9,Lig3,Hsp90aa1,Sirt1
GO:0071704	Organic substance metabolic process	126	6824	0.15	0.0005	3.30103	10090.ENSMUSP00000003818,10090.ENSMUSP00000003876,10090.ENSMUSP00000005003,10090.ENSMUSP00000005503,10090.ENSMUSP00000006565,10090.ENSMUSP00000010940,10090.ENSMUSP00000013338,10090.ENSMUSP00000015800,10090.ENSMUSP00000015892,10090.ENSMUSP00000020252,10090.ENSMUSP00000020365,10090.ENSMUSP00000020649,10090.ENSMUSP00000020931,10090.ENSMUSP00000021824,10090.ENSMUSP00000022612,10090.ENSMUSP00000022793…	Insig2,Brd8,Lbr,Msh6,Cdc20,Asz1,Arih2,Hspa8,Prpf3,Sycp3,Mum1,Rad50,Smc6,Nol8,Pbk,Acin1,Ercc4,Tarbp2,Phf10,Usp49,Ercc3,Iws1,Smc3,Pcgf6,Sf3b1,Trip12,Pask,Dtl,Prpf38b,Nbn,Psip1,Nasp,Sfpq,Ppm1g,Rfc1,Aplf,Pagr1a,Coprs,Nek1,Ints10,Usp2,Nktr,Topbp1,Tdrd6,Ccar2,Slx4,Ythdc1,Shprh,Psmf1,Smg7,Msl1,Smg6,Smarca5,Ttbk1,Atrip,Mael,Rbbp8,Camk4,Leo1,Phf2,Parp2,Alkbh5,Rbbp6,Acot10,Akap8l,Setx,Ddi1,Tex14,Nipbl,Ppp1…
GO:0007286	Spermatid development	12	172	0.73	0.00092	3.03621	10090.ENSMUSP00000002444,10090.ENSMUSP00000020252,10090.ENSMUSP00000023530,10090.ENSMUSP00000023813,10090.ENSMUSP00000029927,10090.ENSMUSP00000074707,10090.ENSMUSP00000079306,10090.ENSMUSP00000101834,10090.ENSMUSP00000111523,10090.ENSMUSP00000118333,10090.ENSMUSP00000120314,10090.ENSMUSP00000127616	Rfx2,Sycp3,Ropn1,Tarbp2,Spaca1,Cdyl,Hspa2,Cep131,Cabyr,Ube2j1,Fsip2,H1fnt
GO:0031324	Negative regulation of cellular metabolic process	59	2497	0.26	0.00092	3.03621	10090.ENSMUSP00000001620,10090.ENSMUSP00000003818,10090.ENSMUSP00000005503,10090.ENSMUSP00000005620,10090.ENSMUSP00000007800,10090.ENSMUSP00000015800,10090.ENSMUSP00000018909,10090.ENSMUSP00000020649,10090.ENSMUSP00000022590,10090.ENSMUSP00000022612,10090.ENSMUSP00000022682,10090.ENSMUSP00000022793,10090.ENSMUSP00000023206,10090.ENSMUSP00000024657,10090.ENSMUSP00000026032,10090.ENSMUSP00000027421…	Fxr1,Insig2,Msh6,Dnajb1,Arpp19,Hspa8,Fxr2,Rad50,Dnajc15,Pbk,Sorbs3,Acin1,Ercc4,Phf10,Pcgf6,Trip12,Ncl,Pask,Rbl1,Nbn,Sfpq,Rfc1,Usp2,Ccar2,Slx4,Psmf1,Traf3ip1,Smg6,Bclaf1,Smarca5,Mael,Rbbp8,Fnip1,Fscb,Nipbl,Ppp1r2,Ilf3,Zfp608,Cdyl,Npm1,Abce1,Ddx20,Lig3,Grb10,Hdac1,Sirt1,Rere,Usp47,Srcin1,Itch,Hnrnpc,Hat1,Zfp318,Mphosph8,Ube2j1,Uimc1,H1fnt,Cd2bp2,Nelfe
GO:0016570	Histone modification	17	346	0.58	0.00094	3.02687	10090.ENSMUSP00000003876,10090.ENSMUSP00000024657,10090.ENSMUSP00000024779,10090.ENSMUSP00000026032,10090.ENSMUSP00000030623,10090.ENSMUSP00000032918,10090.ENSMUSP00000033839,10090.ENSMUSP00000042792,10090.ENSMUSP00000046905,10090.ENSMUSP00000047308,10090.ENSMUSP00000074707,10090.ENSMUSP00000080425,10090.ENSMUSP00000099657,10090.ENSMUSP00000101082,10090.ENSMUSP00000105007,10090.ENSMUSP00000107750…	Brd8,Phf10,Usp49,Pcgf6,Sfpq,Pagr1a,Coprs,Msl1,Leo1,Phf2,Cdyl,Eya3,Hdac1,Sirt1,Brd1,Hat1,Uimc1
GO:0051726	Regulation of cell cycle	32	1016	0.39	0.00096	3.01773	10090.ENSMUSP00000006565,10090.ENSMUSP00000015800,10090.ENSMUSP00000020649,10090.ENSMUSP00000022998,10090.ENSMUSP00000025241,10090.ENSMUSP00000025930,10090.ENSMUSP00000027933,10090.ENSMUSP00000029170,10090.ENSMUSP00000029879,10090.ENSMUSP00000030623,10090.ENSMUSP00000031032,10090.ENSMUSP00000032918,10090.ENSMUSP00000034065,10090.ENSMUSP00000034508,10090.ENSMUSP00000035164,10090.ENSMUSP00000036924…	Cdc20,Hspa8,Rad50,Mtbp,Ercc3,Smc3,Dtl,Rbl1,Nbn,Sfpq,Ppm1g,Pagr1a,Nek1,Usp2,Topbp1,Ccar2,Ttbk1,Atrip,Tex14,Cenpe,Nipbl,Cspp1,Npm1,Prpf40a,Hspa2,Eif4g3,Lin9,Sirt1,Cep131,Usp47,Cdk5rap2,Uimc1
GO:0010639	Negative regulation of organelle organization	18	388	0.55	0.001	3	10090.ENSMUSP00000020649,10090.ENSMUSP00000022998,10090.ENSMUSP00000023206,10090.ENSMUSP00000027421,10090.ENSMUSP00000029879,10090.ENSMUSP00000030636,10090.ENSMUSP00000034239,10090.ENSMUSP00000038871,10090.ENSMUSP00000043555,10090.ENSMUSP00000047308,10090.ENSMUSP00000049026,10090.ENSMUSP00000054444,10090.ENSMUSP00000057938,10090.ENSMUSP00000075067,10090.ENSMUSP00000101082,10090.ENSMUSP00000107237…	Rad50,Mtbp,Ercc4,Trip12,Nbn,Stmn1,Katnb1,Slx4,Smg6,Phf2,Fnip1,Tex14,Cenpe,Npm1,Sirt1,Hnrnpc,Cdk5rap2,H1fnt
GO:0003341	Cilium movement	11	146	0.76	0.0011	2.95861	10090.ENSMUSP00000023530,10090.ENSMUSP00000045430,10090.ENSMUSP00000050962,10090.ENSMUSP00000054909,10090.ENSMUSP00000059630,10090.ENSMUSP00000096487,10090.ENSMUSP00000096769,10090.ENSMUSP00000101834,10090.ENSMUSP00000113309,10090.ENSMUSP00000120314,10090.ENSMUSP00000134066	Ropn1,Catsper1,Akap4,Txndc2,Prm3,Smcp,Ddx4,Cep131,Wdr66,Fsip2,Spag17
GO:0050789	Regulation of biological process	167	9973	0.11	0.0011	2.95861	10090.ENSMUSP00000001279,10090.ENSMUSP00000001620,10090.ENSMUSP00000002444,10090.ENSMUSP00000003818,10090.ENSMUSP00000003876,10090.ENSMUSP00000005503,10090.ENSMUSP00000005620,10090.ENSMUSP00000006565,10090.ENSMUSP00000007800,10090.ENSMUSP00000010940,10090.ENSMUSP00000013338,10090.ENSMUSP00000015800,10090.ENSMUSP00000018909,10090.ENSMUSP00000020649,10090.ENSMUSP00000020931,10090.ENSMUSP00000020963…	Lsr,Fxr1,Rfx2,Insig2,Brd8,Msh6,Dnajb1,Cdc20,Arpp19,Asz1,Arih2,Hspa8,Fxr2,Rad50,Smc6,Dcdc2c,Nol8,Dnajc15,Pbk,Sorbs3,Acin1,Mtbp,Ercc4,Ropn1,Tarbp2,Phf10,Ercc3,Iws1,Apba1,Mtl5,Smc3,Pcgf6,Trip12,Ncl,Pask,Ppp1r7,Dtl,BC005624,Api5,Rbl1,Nbn,Murc,Psip1,Sfpq,Stmn1,Rgs12,Ppm1g,Rfc1,Aplf,Pagr1a,Nek1,Katnb1,Usp2,Topbp1,Ccar2,Cep72,Slx4,Ythdc1,Pcm1,Psmf1,Smg7,Traf3ip1,Cmtm2b,Smg6,Bclaf1,Smarca5,Tbc1d1,Ttbk1,S…
GO:0007140	Male meiotic nuclear division	7	49	1.04	0.0012	2.92082	10090.ENSMUSP00000010940,10090.ENSMUSP00000045828,10090.ENSMUSP00000054444,10090.ENSMUSP00000078022,10090.ENSMUSP00000079306,10090.ENSMUSP00000079909,10090.ENSMUSP00000096769	Asz1,Mael,Tex14,Tdrd9,Hspa2,Sycp2,Ddx4
GO:0051304	Chromosome separation	6	31	1.17	0.0012	2.92082	10090.ENSMUSP00000020252,10090.ENSMUSP00000023206,10090.ENSMUSP00000038871,10090.ENSMUSP00000054444,10090.ENSMUSP00000064465,10090.ENSMUSP00000108310	Sycp3,Ercc4,Slx4,Tex14,Espl1,Hfm1
GO:0034587	piRNA metabolic process	5	17	1.36	0.0013	2.88606	10090.ENSMUSP00000010940,10090.ENSMUSP00000045828,10090.ENSMUSP00000078022,10090.ENSMUSP00000096769,10090.ENSMUSP00000107231	Asz1,Mael,Tdrd9,Ddx4,Tdrd1
GO:0050794	Regulation of cellular process	161	9541	0.11	0.0013	2.88606	10090.ENSMUSP00000001620,10090.ENSMUSP00000002444,10090.ENSMUSP00000003818,10090.ENSMUSP00000003876,10090.ENSMUSP00000005503,10090.ENSMUSP00000005620,10090.ENSMUSP00000006565,10090.ENSMUSP00000007800,10090.ENSMUSP00000013338,10090.ENSMUSP00000015800,10090.ENSMUSP00000018909,10090.ENSMUSP00000020649,10090.ENSMUSP00000020931,10090.ENSMUSP00000020963,10090.ENSMUSP00000021824,10090.ENSMUSP00000022590…	Fxr1,Rfx2,Insig2,Brd8,Msh6,Dnajb1,Cdc20,Arpp19,Arih2,Hspa8,Fxr2,Rad50,Smc6,Dcdc2c,Nol8,Dnajc15,Pbk,Sorbs3,Acin1,Mtbp,Ercc4,Ropn1,Tarbp2,Phf10,Ercc3,Iws1,Apba1,Mtl5,Smc3,Pcgf6,Trip12,Ncl,Pask,Ppp1r7,Dtl,BC005624,Api5,Rbl1,Nbn,Murc,Psip1,Sfpq,Stmn1,Rgs12,Ppm1g,Rfc1,Aplf,Pagr1a,Nek1,Katnb1,Usp2,Topbp1,Ccar2,Cep72,Slx4,Ythdc1,Pcm1,Psmf1,Smg7,Traf3ip1,Cmtm2b,Smg6,Bclaf1,Smarca5,Ttbk1,Suco,Atrip,Catspe…
GO:0051053	Negative regulation of dna metabolic process	10	123	0.8	0.0015	2.82391	10090.ENSMUSP00000005503,10090.ENSMUSP00000020649,10090.ENSMUSP00000023206,10090.ENSMUSP00000027421,10090.ENSMUSP00000029879,10090.ENSMUSP00000038871,10090.ENSMUSP00000043555,10090.ENSMUSP00000090525,10090.ENSMUSP00000107237,10090.ENSMUSP00000127616	Msh6,Rad50,Ercc4,Trip12,Nbn,Slx4,Smg6,Lig3,Hnrnpc,H1fnt
GO:0051172	Negative regulation of nitrogen compound metabolic process	55	2310	0.26	0.0015	2.82391	10090.ENSMUSP00000001620,10090.ENSMUSP00000005503,10090.ENSMUSP00000005620,10090.ENSMUSP00000007800,10090.ENSMUSP00000015800,10090.ENSMUSP00000018909,10090.ENSMUSP00000020649,10090.ENSMUSP00000022612,10090.ENSMUSP00000022682,10090.ENSMUSP00000022793,10090.ENSMUSP00000023206,10090.ENSMUSP00000024657,10090.ENSMUSP00000026032,10090.ENSMUSP00000027421,10090.ENSMUSP00000027438,10090.ENSMUSP00000029170…	Fxr1,Msh6,Dnajb1,Arpp19,Hspa8,Fxr2,Rad50,Pbk,Sorbs3,Acin1,Ercc4,Phf10,Pcgf6,Trip12,Ncl,Rbl1,Nbn,Sfpq,Rfc1,Usp2,Ccar2,Slx4,Psmf1,Traf3ip1,Smg6,Bclaf1,Smarca5,Mael,Rbbp8,Fnip1,Fscb,Nipbl,Ppp1r2,Ilf3,Zfp608,Cdyl,Npm1,Abce1,Ddx20,Lig3,Hdac1,Sirt1,Rere,Usp47,Srcin1,Itch,Hnrnpc,Hat1,Zfp318,Mphosph8,Ube2j1,Uimc1,Mycbp2,H1fnt,Nelfe
GO:2001020	Regulation of response to dna damage stimulus	13	217	0.66	0.0015	2.82391	10090.ENSMUSP00000001620,10090.ENSMUSP00000018909,10090.ENSMUSP00000023206,10090.ENSMUSP00000027421,10090.ENSMUSP00000032918,10090.ENSMUSP00000034065,10090.ENSMUSP00000036924,10090.ENSMUSP00000043583,10090.ENSMUSP00000075067,10090.ENSMUSP00000080425,10090.ENSMUSP00000101082,10090.ENSMUSP00000102264,10090.ENSMUSP00000122196	Fxr1,Fxr2,Ercc4,Trip12,Pagr1a,Nek1,Ccar2,Bclaf1,Npm1,Eya3,Sirt1,Usp47,Uimc1
GO:0051173	Positive regulation of nitrogen compound metabolic process	68	3119	0.23	0.0018	2.74473	10090.ENSMUSP00000001620,10090.ENSMUSP00000002444,10090.ENSMUSP00000003818,10090.ENSMUSP00000003876,10090.ENSMUSP00000006565,10090.ENSMUSP00000013338,10090.ENSMUSP00000015800,10090.ENSMUSP00000018909,10090.ENSMUSP00000020649,10090.ENSMUSP00000022612,10090.ENSMUSP00000022682,10090.ENSMUSP00000023813,10090.ENSMUSP00000024657,10090.ENSMUSP00000025241,10090.ENSMUSP00000026032,10090.ENSMUSP00000027438…	Fxr1,Rfx2,Insig2,Brd8,Cdc20,Arih2,Hspa8,Fxr2,Rad50,Pbk,Sorbs3,Tarbp2,Phf10,Ercc3,Pcgf6,Ncl,Ppp1r7,Dtl,Nbn,Murc,Psip1,Sfpq,Rfc1,Aplf,Pagr1a,Nek1,Ccar2,Slx4,Bclaf1,Smarca5,Ttbk1,Camk4,Leo1,Phf2,Fnip1,Akap8l,Setx,Cenpe,Nipbl,Ilf3,Tceb2,Nup98,Npm1,Hspa2,Eya3,Eif4g3,Adnp,Tfam,Hsf5,Hsp90aa1,Hdac1,Osbpl8,Sirt1,Rere,Srcin1,Spag8,Tcf20,Itch,Srsf5,Zfp318,Magi3,Cdca2,Cdk5rap2,Uimc1,Mycbp2,H1fnt,Nolc1,Nelfe
GO:0000819	Sister chromatid segregation	10	128	0.78	0.0019	2.72125	10090.ENSMUSP00000006565,10090.ENSMUSP00000020252,10090.ENSMUSP00000025930,10090.ENSMUSP00000031170,10090.ENSMUSP00000034239,10090.ENSMUSP00000051389,10090.ENSMUSP00000054444,10090.ENSMUSP00000057938,10090.ENSMUSP00000059385,10090.ENSMUSP00000064465	Cdc20,Sycp3,Smc3,Cenpc1,Katnb1,Akap8l,Tex14,Cenpe,Nipbl,Espl1
GO:0043046	DNA methylation involved in gamete generation	5	19	1.31	0.0019	2.72125	10090.ENSMUSP00000010940,10090.ENSMUSP00000045828,10090.ENSMUSP00000078022,10090.ENSMUSP00000096769,10090.ENSMUSP00000107231	Asz1,Mael,Tdrd9,Ddx4,Tdrd1
GO:0010564	Regulation of cell cycle process	22	583	0.46	0.002	2.69897	10090.ENSMUSP00000006565,10090.ENSMUSP00000022998,10090.ENSMUSP00000025241,10090.ENSMUSP00000025930,10090.ENSMUSP00000027933,10090.ENSMUSP00000029170,10090.ENSMUSP00000029879,10090.ENSMUSP00000030623,10090.ENSMUSP00000032918,10090.ENSMUSP00000035164,10090.ENSMUSP00000054444,10090.ENSMUSP00000057938,10090.ENSMUSP00000059385,10090.ENSMUSP00000068804,10090.ENSMUSP00000075067,10090.ENSMUSP00000075655…	Cdc20,Mtbp,Ercc3,Smc3,Dtl,Rbl1,Nbn,Sfpq,Pagr1a,Topbp1,Tex14,Cenpe,Nipbl,Cspp1,Npm1,Prpf40a,Hspa2,Eif4g3,Cep131,Usp47,Cdk5rap2,Uimc1
GO:0032205	Negative regulation of telomere maintenance	6	35	1.12	0.0021	2.67778	10090.ENSMUSP00000020649,10090.ENSMUSP00000023206,10090.ENSMUSP00000029879,10090.ENSMUSP00000038871,10090.ENSMUSP00000043555,10090.ENSMUSP00000107237	Rad50,Ercc4,Nbn,Slx4,Smg6,Hnrnpc
GO:1903506	Regulation of nucleic acid-templated transcription	62	2771	0.24	0.0022	2.65758	10090.ENSMUSP00000002444,10090.ENSMUSP00000003818,10090.ENSMUSP00000003876,10090.ENSMUSP00000005620,10090.ENSMUSP00000015800,10090.ENSMUSP00000022682,10090.ENSMUSP00000024657,10090.ENSMUSP00000025241,10090.ENSMUSP00000025840,10090.ENSMUSP00000026032,10090.ENSMUSP00000027438,10090.ENSMUSP00000029170,10090.ENSMUSP00000030033,10090.ENSMUSP00000030207,10090.ENSMUSP00000030623,10090.ENSMUSP00000031092…	Rfx2,Insig2,Brd8,Dnajb1,Hspa8,Sorbs3,Phf10,Ercc3,Mtl5,Pcgf6,Ncl,Rbl1,Murc,Psip1,Sfpq,Rfc1,Pagr1a,Usp2,Ccar2,Traf3ip1,Bclaf1,Smarca5,Mael,Rbbp8,Camk4,Leo1,Phf2,Fnip1,Sltm,Akap8l,Setx,Zbtb11,Nipbl,Ilf3,Tceb2,Sbno1,Zfp608,Nup98,Cdyl,Npm1,Lin9,Ddx20,Tfam,Morc2a,Hsf5,Hdac1,Sirt1,Rere,Usp47,Spag8,Zfp541,Tcf20,Itch,Ralgapa1,Hat1,Zfp318,Mphosph8,Cdk5rap2,Uimc1,H1fnt,Nolc1,Nelfe
GO:0000723	Telomere maintenance	8	78	0.9	0.0023	2.63827	10090.ENSMUSP00000020649,10090.ENSMUSP00000020931,10090.ENSMUSP00000023206,10090.ENSMUSP00000029879,10090.ENSMUSP00000038871,10090.ENSMUSP00000041241,10090.ENSMUSP00000043555,10090.ENSMUSP00000091921	Rad50,Smc6,Ercc4,Nbn,Slx4,Smg7,Smg6,Hsp90aa1
GO:1904354	Negative regulation of telomere capping	4	9	1.53	0.0026	2.58503	10090.ENSMUSP00000020649,10090.ENSMUSP00000023206,10090.ENSMUSP00000029879,10090.ENSMUSP00000043555	Rad50,Ercc4,Nbn,Smg6
GO:0045935	Positive regulation of nucleobase-containing compound metabolic process	46	1859	0.28	0.0033	2.48149	10090.ENSMUSP00000002444,10090.ENSMUSP00000003818,10090.ENSMUSP00000003876,10090.ENSMUSP00000015800,10090.ENSMUSP00000020649,10090.ENSMUSP00000024657,10090.ENSMUSP00000025241,10090.ENSMUSP00000026032,10090.ENSMUSP00000027438,10090.ENSMUSP00000029879,10090.ENSMUSP00000030033,10090.ENSMUSP00000030207,10090.ENSMUSP00000030623,10090.ENSMUSP00000031092,10090.ENSMUSP00000032130,10090.ENSMUSP00000032918…	Rfx2,Insig2,Brd8,Hspa8,Rad50,Phf10,Ercc3,Pcgf6,Ncl,Nbn,Murc,Psip1,Sfpq,Rfc1,Aplf,Pagr1a,Ccar2,Slx4,Bclaf1,Smarca5,Camk4,Leo1,Phf2,Akap8l,Setx,Nipbl,Ilf3,Tceb2,Nup98,Npm1,Eya3,Tfam,Hsf5,Hsp90aa1,Hdac1,Sirt1,Rere,Spag8,Tcf20,Srsf5,Zfp318,Cdk5rap2,Uimc1,H1fnt,Nolc1,Nelfe
GO:0022607	Cellular component assembly	48	1983	0.27	0.0036	2.4437	10090.ENSMUSP00000001279,10090.ENSMUSP00000002444,10090.ENSMUSP00000006565,10090.ENSMUSP00000015892,10090.ENSMUSP00000020252,10090.ENSMUSP00000023813,10090.ENSMUSP00000025830,10090.ENSMUSP00000027127,10090.ENSMUSP00000029879,10090.ENSMUSP00000029927,10090.ENSMUSP00000030033,10090.ENSMUSP00000030207,10090.ENSMUSP00000030456,10090.ENSMUSP00000031170,10090.ENSMUSP00000034065,10090.ENSMUSP00000035338…	Lsr,Rfx2,Cdc20,Prpf3,Sycp3,Tarbp2,Apba1,Sf3b1,Nbn,Spaca1,Murc,Psip1,Nasp,Cenpc1,Nek1,Tdrd6,Cep72,Slx4,Ythdc1,Shprh,Pcm1,Traf3ip1,Smarca5,Akap4,Setx,Cenpe,Glrx3,Nup98,Nap1l4,Npm1,Ddx20,Tfam,Hsp90aa1,Hdac1,Sirt1,Cep131,Kif24,Wdr62,Hat1,Epb4.1l3,Ccdc13,Bbs9,Talpid3,Cdk5rap2,Fsip2,Myo9a,H1fnt,Spag17
GO:0033043	Regulation of organelle organization	35	1258	0.33	0.0036	2.4437	10090.ENSMUSP00000006565,10090.ENSMUSP00000020649,10090.ENSMUSP00000022682,10090.ENSMUSP00000022998,10090.ENSMUSP00000023206,10090.ENSMUSP00000025243,10090.ENSMUSP00000025930,10090.ENSMUSP00000027421,10090.ENSMUSP00000029879,10090.ENSMUSP00000030623,10090.ENSMUSP00000030636,10090.ENSMUSP00000034239,10090.ENSMUSP00000038871,10090.ENSMUSP00000041241,10090.ENSMUSP00000042391,10090.ENSMUSP00000043555…	Cdc20,Rad50,Sorbs3,Mtbp,Ercc4,Iws1,Smc3,Trip12,Nbn,Sfpq,Stmn1,Katnb1,Slx4,Smg7,Traf3ip1,Smg6,Phf2,Fnip1,Akap8l,Tex14,Cenpe,Nipbl,Npm1,Eif4g3,Morc2a,Sirt1,Cep131,Hnrnpc,C2cd5,Mphosph8,Cdk5rap2,Mycbp2,H1fnt,Mark2,Nelfe
GO:0051307	Meiotic chromosome separation	5	23	1.22	0.0038	2.42022	10090.ENSMUSP00000020252,10090.ENSMUSP00000023206,10090.ENSMUSP00000038871,10090.ENSMUSP00000064465,10090.ENSMUSP00000108310	Sycp3,Ercc4,Slx4,Espl1,Hfm1
GO:0000278	Mitotic cell cycle	20	527	0.47	0.0042	2.37675	10090.ENSMUSP00000006565,10090.ENSMUSP00000007800,10090.ENSMUSP00000020252,10090.ENSMUSP00000022612,10090.ENSMUSP00000029879,10090.ENSMUSP00000030456,10090.ENSMUSP00000030636,10090.ENSMUSP00000031170,10090.ENSMUSP00000034239,10090.ENSMUSP00000035164,10090.ENSMUSP00000046255,10090.ENSMUSP00000051389,10090.ENSMUSP00000054444,10090.ENSMUSP00000057938,10090.ENSMUSP00000059385,10090.ENSMUSP00000064465…	Cdc20,Arpp19,Sycp3,Pbk,Nbn,Nasp,Stmn1,Cenpc1,Katnb1,Topbp1,Rbbp8,Akap8l,Tex14,Cenpe,Nipbl,Espl1,Srsf2,Wdr62,Cdk5rap2,Cep55
GO:0031497	Chromatin assembly	9	115	0.78	0.0046	2.33724	10090.ENSMUSP00000030456,10090.ENSMUSP00000039422,10090.ENSMUSP00000044361,10090.ENSMUSP00000072510,10090.ENSMUSP00000075067,10090.ENSMUSP00000099657,10090.ENSMUSP00000101082,10090.ENSMUSP00000107750,10090.ENSMUSP00000127616	Nasp,Shprh,Smarca5,Nap1l4,Npm1,Hdac1,Sirt1,Hat1,H1fnt
GO:1901987	Regulation of cell cycle phase transition	14	287	0.58	0.0053	2.27572	10090.ENSMUSP00000022998,10090.ENSMUSP00000025241,10090.ENSMUSP00000027933,10090.ENSMUSP00000029170,10090.ENSMUSP00000029879,10090.ENSMUSP00000032918,10090.ENSMUSP00000035164,10090.ENSMUSP00000054444,10090.ENSMUSP00000057938,10090.ENSMUSP00000075067,10090.ENSMUSP00000079306,10090.ENSMUSP00000102264,10090.ENSMUSP00000119891,10090.ENSMUSP00000122196	Mtbp,Ercc3,Dtl,Rbl1,Nbn,Pagr1a,Topbp1,Tex14,Cenpe,Npm1,Hspa2,Usp47,Cdk5rap2,Uimc1
GO:0008152	Metabolic process	128	7331	0.13	0.0055	2.25964	10090.ENSMUSP00000003818,10090.ENSMUSP00000003876,10090.ENSMUSP00000005003,10090.ENSMUSP00000005503,10090.ENSMUSP00000006565,10090.ENSMUSP00000010940,10090.ENSMUSP00000013338,10090.ENSMUSP00000015800,10090.ENSMUSP00000015892,10090.ENSMUSP00000020252,10090.ENSMUSP00000020365,10090.ENSMUSP00000020649,10090.ENSMUSP00000020931,10090.ENSMUSP00000021824,10090.ENSMUSP00000022612,10090.ENSMUSP00000022793…	Insig2,Brd8,Lbr,Msh6,Cdc20,Asz1,Arih2,Hspa8,Prpf3,Sycp3,Mum1,Rad50,Smc6,Nol8,Pbk,Acin1,Ercc4,Tarbp2,Phf10,Usp49,Ercc3,Iws1,Smc3,Pcgf6,Sf3b1,Trip12,Pask,Dtl,Prpf38b,Nbn,Psip1,Nasp,Sfpq,Ppm1g,Rfc1,Aplf,Pagr1a,Coprs,Nek1,Ints10,Usp2,Nktr,Topbp1,Tdrd6,Ccar2,Slx4,Ythdc1,Shprh,Psmf1,Smg7,Msl1,Smg6,Smarca5,Ttbk1,Atrip,Mael,Rbbp8,Camk4,Leo1,Phf2,Parp2,Alkbh5,Rbbp6,Acot10,Akap8l,Setx,Ddi1,Tex14,Txndc2,Nip…
GO:0050658	RNA transport	10	148	0.72	0.0055	2.25964	10090.ENSMUSP00000025243,10090.ENSMUSP00000030623,10090.ENSMUSP00000039133,10090.ENSMUSP00000049116,10090.ENSMUSP00000062930,10090.ENSMUSP00000068530,10090.ENSMUSP00000075067,10090.ENSMUSP00000079379,10090.ENSMUSP00000084257,10090.ENSMUSP00000131457	Iws1,Sfpq,Ythdc1,Alkbh5,Slbp,Nup98,Npm1,Abce1,Xpo5,Nup50
GO:0044085	Cellular component biogenesis	51	2201	0.25	0.0056	2.25181	10090.ENSMUSP00000001279,10090.ENSMUSP00000002444,10090.ENSMUSP00000006565,10090.ENSMUSP00000015892,10090.ENSMUSP00000020252,10090.ENSMUSP00000021824,10090.ENSMUSP00000023813,10090.ENSMUSP00000025830,10090.ENSMUSP00000027127,10090.ENSMUSP00000029879,10090.ENSMUSP00000029927,10090.ENSMUSP00000030033,10090.ENSMUSP00000030207,10090.ENSMUSP00000030456,10090.ENSMUSP00000030684,10090.ENSMUSP00000031170…	Lsr,Rfx2,Cdc20,Prpf3,Sycp3,Nol8,Tarbp2,Apba1,Sf3b1,Nbn,Spaca1,Murc,Psip1,Nasp,Gnl2,Cenpc1,Nek1,Tdrd6,Cep72,Slx4,Ythdc1,Shprh,Pcm1,Traf3ip1,Smarca5,Akap4,Setx,Cenpe,Glrx3,Nup98,Nap1l4,Npm1,Abce1,Ddx20,Tfam,Hsp90aa1,Hdac1,Sirt1,Cep131,Kif24,Wdr62,Hat1,Epb4.1l3,Ccdc13,Bbs9,Talpid3,Cdk5rap2,Fsip2,Myo9a,H1fnt,Spag17
GO:0031325	Positive regulation of cellular metabolic process	69	3320	0.2	0.006	2.22185	10090.ENSMUSP00000001620,10090.ENSMUSP00000002444,10090.ENSMUSP00000003818,10090.ENSMUSP00000003876,10090.ENSMUSP00000006565,10090.ENSMUSP00000007800,10090.ENSMUSP00000013338,10090.ENSMUSP00000015800,10090.ENSMUSP00000018909,10090.ENSMUSP00000020649,10090.ENSMUSP00000022612,10090.ENSMUSP00000022682,10090.ENSMUSP00000023813,10090.ENSMUSP00000024657,10090.ENSMUSP00000025241,10090.ENSMUSP00000026032…	Fxr1,Rfx2,Insig2,Brd8,Cdc20,Arpp19,Arih2,Hspa8,Fxr2,Rad50,Pbk,Sorbs3,Tarbp2,Phf10,Ercc3,Pcgf6,Ncl,Ppp1r7,Nbn,Murc,Psip1,Sfpq,Rfc1,Aplf,Pagr1a,Nek1,Ccar2,Slx4,Bclaf1,Smarca5,Ttbk1,Camk4,Leo1,Phf2,Fnip1,Akap8l,Setx,Cenpe,Nipbl,Ilf3,Tceb2,Nup98,Npm1,Hspa2,Eya3,Eif4g3,Adnp,Tfam,Grb10,Hsf5,Hsp90aa1,Hdac1,Osbpl8,Sirt1,Rere,Srcin1,Spag8,Tcf20,Itch,Srsf5,Zfp318,Magi3,Cdca2,Cdk5rap2,Uimc1,Mycbp2,H1fnt,Nol…
GO:0065007	Biological regulation	171	10591	0.1	0.0066	2.18046	10090.ENSMUSP00000001279,10090.ENSMUSP00000001620,10090.ENSMUSP00000002444,10090.ENSMUSP00000002445,10090.ENSMUSP00000003818,10090.ENSMUSP00000003876,10090.ENSMUSP00000005503,10090.ENSMUSP00000005620,10090.ENSMUSP00000006565,10090.ENSMUSP00000007800,10090.ENSMUSP00000010940,10090.ENSMUSP00000013338,10090.ENSMUSP00000015800,10090.ENSMUSP00000018909,10090.ENSMUSP00000020649,10090.ENSMUSP00000020931…	Lsr,Fxr1,Rfx2,Ranbp3,Insig2,Brd8,Msh6,Dnajb1,Cdc20,Arpp19,Asz1,Arih2,Hspa8,Fxr2,Rad50,Smc6,Dcdc2c,Nol8,Dnajc15,Pbk,Sorbs3,Acin1,Mtbp,Ercc4,Ropn1,Tarbp2,Phf10,Ercc3,Iws1,Apba1,Mtl5,Smc3,Pcgf6,Trip12,Ncl,Pask,Ppp1r7,Dtl,BC005624,Api5,Rbl1,Nbn,Murc,Psip1,Sfpq,Stmn1,Rgs12,Ppm1g,Rfc1,Aplf,Pagr1a,Nek1,Katnb1,Usp2,Lca5,Topbp1,Ccar2,Cep72,Slx4,Ythdc1,Pcm1,Psmf1,Smg7,Traf3ip1,Cmtm2b,Smg6,Bclaf1,Smarca5,Tb…
GO:0010629	Negative regulation of gene expression	44	1811	0.27	0.0069	2.16115	10090.ENSMUSP00000001620,10090.ENSMUSP00000005620,10090.ENSMUSP00000010940,10090.ENSMUSP00000015800,10090.ENSMUSP00000018909,10090.ENSMUSP00000022682,10090.ENSMUSP00000022793,10090.ENSMUSP00000023813,10090.ENSMUSP00000024657,10090.ENSMUSP00000026032,10090.ENSMUSP00000027438,10090.ENSMUSP00000029170,10090.ENSMUSP00000030623,10090.ENSMUSP00000031092,10090.ENSMUSP00000034508,10090.ENSMUSP00000036924…	Fxr1,Dnajb1,Asz1,Hspa8,Fxr2,Sorbs3,Acin1,Tarbp2,Phf10,Pcgf6,Ncl,Rbl1,Sfpq,Rfc1,Usp2,Ccar2,Smg7,Traf3ip1,Smg6,Bclaf1,Smarca5,Ttbk1,Mael,Fnip1,Nipbl,Ilf3,Zfp608,Npm1,Tdrd9,Ppm1b,Xpo5,Adnp,Ddx20,Morc2a,Ddx4,Hdac1,Sirt1,Usp47,Tdrd1,Hat1,Zfp318,Mphosph8,Uimc1,Nelfe
GO:0010558	Negative regulation of macromolecule biosynthetic process	37	1419	0.3	0.0071	2.14874	10090.ENSMUSP00000001620,10090.ENSMUSP00000005620,10090.ENSMUSP00000015800,10090.ENSMUSP00000018909,10090.ENSMUSP00000022682,10090.ENSMUSP00000024657,10090.ENSMUSP00000026032,10090.ENSMUSP00000027438,10090.ENSMUSP00000027493,10090.ENSMUSP00000029170,10090.ENSMUSP00000030623,10090.ENSMUSP00000031092,10090.ENSMUSP00000034508,10090.ENSMUSP00000036924,10090.ENSMUSP00000042391,10090.ENSMUSP00000043583…	Fxr1,Dnajb1,Hspa8,Fxr2,Sorbs3,Phf10,Pcgf6,Ncl,Pask,Rbl1,Sfpq,Rfc1,Usp2,Ccar2,Traf3ip1,Bclaf1,Smarca5,Mael,Rbbp8,Fnip1,Nipbl,Ilf3,Zfp608,Cdyl,Ddx20,Lig3,Grb10,Hdac1,Sirt1,Rere,Usp47,Hnrnpc,Hat1,Zfp318,Mphosph8,Uimc1,Nelfe
GO:0010604	Positive regulation of macromolecule metabolic process	71	3467	0.2	0.0071	2.14874	10090.ENSMUSP00000001620,10090.ENSMUSP00000002444,10090.ENSMUSP00000003818,10090.ENSMUSP00000003876,10090.ENSMUSP00000006565,10090.ENSMUSP00000013338,10090.ENSMUSP00000015800,10090.ENSMUSP00000018909,10090.ENSMUSP00000020649,10090.ENSMUSP00000022612,10090.ENSMUSP00000022682,10090.ENSMUSP00000023813,10090.ENSMUSP00000024657,10090.ENSMUSP00000025241,10090.ENSMUSP00000026032,10090.ENSMUSP00000027438…	Fxr1,Rfx2,Insig2,Brd8,Cdc20,Arih2,Hspa8,Fxr2,Rad50,Pbk,Sorbs3,Tarbp2,Phf10,Ercc3,Pcgf6,Ncl,Ppp1r7,Dtl,Nbn,Murc,Psip1,Sfpq,Rfc1,Aplf,Pagr1a,Nek1,Ccar2,Slx4,Bclaf1,Smarca5,Ttbk1,Camk4,Leo1,Phf2,Fnip1,Akap8l,Setx,Cenpe,Nipbl,Ilf3,Tceb2,Nup98,Npm1,Hspa2,Eya3,Eif4g3,Adnp,Tfam,Morc2a,Hsf5,Hsp90aa1,Hdac1,Osbpl8,Sirt1,Rere,Srcin1,Spag8,Tcf20,Itch,Srsf5,Hnrnpc,Zfp318,Mphosph8,Magi3,Cdca2,Cdk5rap2,Uimc1,My…
GO:0031327	Negative regulation of cellular biosynthetic process	38	1475	0.3	0.0071	2.14874	10090.ENSMUSP00000001620,10090.ENSMUSP00000003818,10090.ENSMUSP00000005620,10090.ENSMUSP00000015800,10090.ENSMUSP00000018909,10090.ENSMUSP00000022682,10090.ENSMUSP00000024657,10090.ENSMUSP00000026032,10090.ENSMUSP00000027438,10090.ENSMUSP00000027493,10090.ENSMUSP00000029170,10090.ENSMUSP00000030623,10090.ENSMUSP00000031092,10090.ENSMUSP00000034508,10090.ENSMUSP00000036924,10090.ENSMUSP00000042391…	Fxr1,Insig2,Dnajb1,Hspa8,Fxr2,Sorbs3,Phf10,Pcgf6,Ncl,Pask,Rbl1,Sfpq,Rfc1,Usp2,Ccar2,Traf3ip1,Bclaf1,Smarca5,Mael,Rbbp8,Fnip1,Nipbl,Ilf3,Zfp608,Cdyl,Ddx20,Lig3,Grb10,Hdac1,Sirt1,Rere,Usp47,Hnrnpc,Hat1,Zfp318,Mphosph8,Uimc1,Nelfe
GO:0044782	Cilium organization	14	298	0.56	0.0071	2.14874	10090.ENSMUSP00000002444,10090.ENSMUSP00000023530,10090.ENSMUSP00000034065,10090.ENSMUSP00000034791,10090.ENSMUSP00000039709,10090.ENSMUSP00000042391,10090.ENSMUSP00000050962,10090.ENSMUSP00000101834,10090.ENSMUSP00000103690,10090.ENSMUSP00000114787,10090.ENSMUSP00000116629,10090.ENSMUSP00000118956,10090.ENSMUSP00000120314,10090.ENSMUSP00000134066	Rfx2,Ropn1,Nek1,Lca5,Pcm1,Traf3ip1,Akap4,Cep131,Kif24,Ccdc13,Bbs9,Talpid3,Fsip2,Spag17
GO:0006355	Regulation of transcription, dna-templated	59	2720	0.22	0.0075	2.12494	10090.ENSMUSP00000002444,10090.ENSMUSP00000003818,10090.ENSMUSP00000003876,10090.ENSMUSP00000005620,10090.ENSMUSP00000015800,10090.ENSMUSP00000022682,10090.ENSMUSP00000024657,10090.ENSMUSP00000025241,10090.ENSMUSP00000025840,10090.ENSMUSP00000026032,10090.ENSMUSP00000027438,10090.ENSMUSP00000029170,10090.ENSMUSP00000030033,10090.ENSMUSP00000030207,10090.ENSMUSP00000030623,10090.ENSMUSP00000031092…	Rfx2,Insig2,Brd8,Dnajb1,Hspa8,Sorbs3,Phf10,Ercc3,Mtl5,Pcgf6,Ncl,Rbl1,Murc,Psip1,Sfpq,Rfc1,Pagr1a,Usp2,Ccar2,Traf3ip1,Bclaf1,Smarca5,Mael,Camk4,Leo1,Phf2,Fnip1,Sltm,Akap8l,Setx,Zbtb11,Nipbl,Ilf3,Tceb2,Sbno1,Zfp608,Npm1,Lin9,Ddx20,Tfam,Morc2a,Hsf5,Hdac1,Sirt1,Rere,Usp47,Spag8,Zfp541,Tcf20,Itch,Ralgapa1,Hat1,Zfp318,Mphosph8,Cdk5rap2,Uimc1,H1fnt,Nolc1,Nelfe
GO:2001252	Positive regulation of chromosome organization	11	192	0.65	0.0084	2.07572	10090.ENSMUSP00000020649,10090.ENSMUSP00000029879,10090.ENSMUSP00000030623,10090.ENSMUSP00000038871,10090.ENSMUSP00000051389,10090.ENSMUSP00000057938,10090.ENSMUSP00000059385,10090.ENSMUSP00000091087,10090.ENSMUSP00000101082,10090.ENSMUSP00000112170,10090.ENSMUSP00000134272	Rad50,Nbn,Sfpq,Slx4,Akap8l,Cenpe,Nipbl,Morc2a,Sirt1,Mphosph8,Nelfe
GO:1902749	Regulation of cell cycle g2/m phase transition	8	99	0.79	0.0091	2.04096	10090.ENSMUSP00000027933,10090.ENSMUSP00000029879,10090.ENSMUSP00000032918,10090.ENSMUSP00000035164,10090.ENSMUSP00000075067,10090.ENSMUSP00000079306,10090.ENSMUSP00000102264,10090.ENSMUSP00000122196	Dtl,Nbn,Pagr1a,Topbp1,Npm1,Hspa2,Usp47,Uimc1
GO:0000070	Mitotic sister chromatid segregation	8	101	0.79	0.0103	1.98716	10090.ENSMUSP00000006565,10090.ENSMUSP00000031170,10090.ENSMUSP00000034239,10090.ENSMUSP00000051389,10090.ENSMUSP00000054444,10090.ENSMUSP00000057938,10090.ENSMUSP00000059385,10090.ENSMUSP00000064465	Cdc20,Cenpc1,Katnb1,Akap8l,Tex14,Cenpe,Nipbl,Espl1
GO:0006913	Nucleocytoplasmic transport	11	199	0.63	0.011	1.95861	10090.ENSMUSP00000002445,10090.ENSMUSP00000015800,10090.ENSMUSP00000039133,10090.ENSMUSP00000046539,10090.ENSMUSP00000049116,10090.ENSMUSP00000066797,10090.ENSMUSP00000068530,10090.ENSMUSP00000075067,10090.ENSMUSP00000079379,10090.ENSMUSP00000084257,10090.ENSMUSP00000131457	Ranbp3,Hspa8,Ythdc1,Camk4,Alkbh5,Rsrc1,Nup98,Npm1,Abce1,Xpo5,Nup50
GO:0016458	Gene silencing	9	132	0.72	0.011	1.95861	10090.ENSMUSP00000010940,10090.ENSMUSP00000023813,10090.ENSMUSP00000045828,10090.ENSMUSP00000078022,10090.ENSMUSP00000084257,10090.ENSMUSP00000096769,10090.ENSMUSP00000101082,10090.ENSMUSP00000107231,10090.ENSMUSP00000107750	Asz1,Tarbp2,Mael,Tdrd9,Xpo5,Ddx4,Sirt1,Tdrd1,Hat1
GO:0031047	Gene silencing by rna	7	75	0.86	0.011	1.95861	10090.ENSMUSP00000010940,10090.ENSMUSP00000023813,10090.ENSMUSP00000045828,10090.ENSMUSP00000078022,10090.ENSMUSP00000084257,10090.ENSMUSP00000096769,10090.ENSMUSP00000107231	Asz1,Tarbp2,Mael,Tdrd9,Xpo5,Ddx4,Tdrd1
GO:0000226	Microtubule cytoskeleton organization	18	484	0.46	0.0113	1.94692	10090.ENSMUSP00000006565,10090.ENSMUSP00000030636,10090.ENSMUSP00000033490,10090.ENSMUSP00000034239,10090.ENSMUSP00000037788,10090.ENSMUSP00000039709,10090.ENSMUSP00000045480,10090.ENSMUSP00000057938,10090.ENSMUSP00000064465,10090.ENSMUSP00000075067,10090.ENSMUSP00000101834,10090.ENSMUSP00000103690,10090.ENSMUSP00000103825,10090.ENSMUSP00000114787,10090.ENSMUSP00000119891,10090.ENSMUSP00000120314…	Cdc20,Stmn1,Ccdc120,Katnb1,Cep72,Pcm1,Dync1li2,Cenpe,Espl1,Npm1,Cep131,Kif24,Wdr62,Ccdc13,Cdk5rap2,Fsip2,Mark2,Spag17
GO:0010948	Negative regulation of cell cycle process	11	204	0.62	0.013	1.88606	10090.ENSMUSP00000022998,10090.ENSMUSP00000027933,10090.ENSMUSP00000029170,10090.ENSMUSP00000029879,10090.ENSMUSP00000035164,10090.ENSMUSP00000054444,10090.ENSMUSP00000057938,10090.ENSMUSP00000075067,10090.ENSMUSP00000102264,10090.ENSMUSP00000119891,10090.ENSMUSP00000122196	Mtbp,Dtl,Rbl1,Nbn,Topbp1,Tex14,Cenpe,Npm1,Usp47,Cdk5rap2,Uimc1
GO:0051253	Negative regulation of rna metabolic process	34	1308	0.3	0.0138	1.86012	10090.ENSMUSP00000005620,10090.ENSMUSP00000015800,10090.ENSMUSP00000022682,10090.ENSMUSP00000022793,10090.ENSMUSP00000024657,10090.ENSMUSP00000026032,10090.ENSMUSP00000029170,10090.ENSMUSP00000030623,10090.ENSMUSP00000031092,10090.ENSMUSP00000034508,10090.ENSMUSP00000036924,10090.ENSMUSP00000042391,10090.ENSMUSP00000043583,10090.ENSMUSP00000044361,10090.ENSMUSP00000045828,10090.ENSMUSP00000046255…	Dnajb1,Hspa8,Sorbs3,Acin1,Phf10,Pcgf6,Rbl1,Sfpq,Rfc1,Usp2,Ccar2,Traf3ip1,Bclaf1,Smarca5,Mael,Rbbp8,Fnip1,Nipbl,Ilf3,Zfp608,Cdyl,Npm1,Abce1,Ddx20,Hdac1,Sirt1,Rere,Usp47,Hnrnpc,Hat1,Zfp318,Mphosph8,Uimc1,Nelfe
GO:0015931	Nucleobase-containing compound transport	11	206	0.61	0.014	1.85387	10090.ENSMUSP00000023344,10090.ENSMUSP00000025243,10090.ENSMUSP00000030623,10090.ENSMUSP00000039133,10090.ENSMUSP00000049116,10090.ENSMUSP00000062930,10090.ENSMUSP00000068530,10090.ENSMUSP00000075067,10090.ENSMUSP00000079379,10090.ENSMUSP00000084257,10090.ENSMUSP00000131457	Slc35a5,Iws1,Sfpq,Ythdc1,Alkbh5,Slbp,Nup98,Npm1,Abce1,Xpo5,Nup50
GO:0032204	Regulation of telomere maintenance	7	79	0.83	0.014	1.85387	10090.ENSMUSP00000020649,10090.ENSMUSP00000023206,10090.ENSMUSP00000029879,10090.ENSMUSP00000038871,10090.ENSMUSP00000041241,10090.ENSMUSP00000043555,10090.ENSMUSP00000107237	Rad50,Ercc4,Nbn,Slx4,Smg7,Smg6,Hnrnpc
GO:2001022	Positive regulation of response to dna damage stimulus	8	107	0.76	0.014	1.85387	10090.ENSMUSP00000001620,10090.ENSMUSP00000018909,10090.ENSMUSP00000032918,10090.ENSMUSP00000036924,10090.ENSMUSP00000043583,10090.ENSMUSP00000080425,10090.ENSMUSP00000101082,10090.ENSMUSP00000122196	Fxr1,Fxr2,Pagr1a,Ccar2,Bclaf1,Eya3,Sirt1,Uimc1
GO:0051129	Negative regulation of cellular component organization	23	733	0.38	0.0141	1.85078	10090.ENSMUSP00000005620,10090.ENSMUSP00000015800,10090.ENSMUSP00000020649,10090.ENSMUSP00000022590,10090.ENSMUSP00000022998,10090.ENSMUSP00000023206,10090.ENSMUSP00000027421,10090.ENSMUSP00000029879,10090.ENSMUSP00000030636,10090.ENSMUSP00000034239,10090.ENSMUSP00000038871,10090.ENSMUSP00000042391,10090.ENSMUSP00000043555,10090.ENSMUSP00000047308,10090.ENSMUSP00000049026,10090.ENSMUSP00000054444…	Dnajb1,Hspa8,Rad50,Dnajc15,Mtbp,Ercc4,Trip12,Nbn,Stmn1,Katnb1,Slx4,Traf3ip1,Smg6,Phf2,Fnip1,Tex14,Cenpe,Npm1,Hspa2,Sirt1,Hnrnpc,Cdk5rap2,H1fnt
GO:0048519	Negative regulation of biological process	94	5108	0.15	0.0149	1.82681	10090.ENSMUSP00000001620,10090.ENSMUSP00000003818,10090.ENSMUSP00000005503,10090.ENSMUSP00000005620,10090.ENSMUSP00000007800,10090.ENSMUSP00000010940,10090.ENSMUSP00000015800,10090.ENSMUSP00000018909,10090.ENSMUSP00000020649,10090.ENSMUSP00000022590,10090.ENSMUSP00000022612,10090.ENSMUSP00000022682,10090.ENSMUSP00000022793,10090.ENSMUSP00000022998,10090.ENSMUSP00000023206,10090.ENSMUSP00000023813…	Fxr1,Insig2,Msh6,Dnajb1,Arpp19,Asz1,Hspa8,Fxr2,Rad50,Dnajc15,Pbk,Sorbs3,Acin1,Mtbp,Ercc4,Tarbp2,Phf10,Pcgf6,Trip12,Ncl,Pask,Dtl,Api5,Rbl1,Nbn,Sfpq,Stmn1,Rgs12,Ppm1g,Rfc1,Katnb1,Usp2,Topbp1,Ccar2,Slx4,Pcm1,Psmf1,Smg7,Traf3ip1,Smg6,Bclaf1,Smarca5,Ttbk1,Atrip,Mael,Rbbp8,Leo1,Phf2,Parp2,Fnip1,Setx,Fscb,Tex14,Cenpe,Nipbl,Ppp1r2,Ilf3,Glrx3,Zfp608,Cdyl,Npm1,Tdrd9,Ppm1b,Hspa2,Abce1,Sycp2,Eya3,Xpo5,Adnp,D…
GO:0009893	Positive regulation of metabolic process	74	3767	0.18	0.0151	1.82102	10090.ENSMUSP00000001620,10090.ENSMUSP00000002444,10090.ENSMUSP00000003818,10090.ENSMUSP00000003876,10090.ENSMUSP00000006565,10090.ENSMUSP00000007800,10090.ENSMUSP00000013338,10090.ENSMUSP00000015800,10090.ENSMUSP00000018909,10090.ENSMUSP00000020649,10090.ENSMUSP00000022612,10090.ENSMUSP00000022682,10090.ENSMUSP00000023813,10090.ENSMUSP00000024657,10090.ENSMUSP00000025241,10090.ENSMUSP00000026032…	Fxr1,Rfx2,Insig2,Brd8,Cdc20,Arpp19,Arih2,Hspa8,Fxr2,Rad50,Pbk,Sorbs3,Tarbp2,Phf10,Ercc3,Pcgf6,Ncl,Ppp1r7,Dtl,Nbn,Murc,Psip1,Sfpq,Rfc1,Aplf,Pagr1a,Nek1,Ccar2,Slx4,Bclaf1,Smarca5,Ttbk1,Suco,Camk4,Leo1,Phf2,Fnip1,Akap8l,Setx,Cenpe,Nipbl,Ilf3,Tceb2,Nup98,Npm1,Hspa2,Eya3,Eif4g3,Adnp,Tfam,Grb10,Morc2a,Hsf5,Hsp90aa1,Hdac1,Osbpl8,Sirt1,Rere,Srcin1,Spag8,Tcf20,Itch,Srsf5,Hnrnpc,Zfp318,Mphosph8,Magi3,Cdca2…
GO:1903047	Mitotic cell cycle process	17	454	0.46	0.0151	1.82102	10090.ENSMUSP00000006565,10090.ENSMUSP00000007800,10090.ENSMUSP00000029879,10090.ENSMUSP00000030456,10090.ENSMUSP00000030636,10090.ENSMUSP00000031170,10090.ENSMUSP00000034239,10090.ENSMUSP00000035164,10090.ENSMUSP00000046255,10090.ENSMUSP00000051389,10090.ENSMUSP00000054444,10090.ENSMUSP00000057938,10090.ENSMUSP00000059385,10090.ENSMUSP00000064465,10090.ENSMUSP00000103825,10090.ENSMUSP00000119891…	Cdc20,Arpp19,Nbn,Nasp,Stmn1,Cenpc1,Katnb1,Topbp1,Rbbp8,Akap8l,Tex14,Cenpe,Nipbl,Espl1,Wdr62,Cdk5rap2,Cep55
GO:0009411	Response to uv	9	143	0.69	0.0174	1.75945	10090.ENSMUSP00000005503,10090.ENSMUSP00000022612,10090.ENSMUSP00000023206,10090.ENSMUSP00000025241,10090.ENSMUSP00000027933,10090.ENSMUSP00000036924,10090.ENSMUSP00000075067,10090.ENSMUSP00000101082,10090.ENSMUSP00000102264	Msh6,Pbk,Ercc4,Ercc3,Dtl,Ccar2,Npm1,Sirt1,Usp47
GO:0007004	Telomere maintenance via telomerase	4	18	1.23	0.0179	1.74715	10090.ENSMUSP00000020649,10090.ENSMUSP00000041241,10090.ENSMUSP00000043555,10090.ENSMUSP00000091921	Rad50,Smg7,Smg6,Hsp90aa1
GO:0071824	protein-DNA complex subunit organization	10	179	0.63	0.0189	1.72354	10090.ENSMUSP00000020252,10090.ENSMUSP00000030456,10090.ENSMUSP00000031170,10090.ENSMUSP00000039422,10090.ENSMUSP00000044361,10090.ENSMUSP00000057938,10090.ENSMUSP00000072510,10090.ENSMUSP00000075067,10090.ENSMUSP00000107750,10090.ENSMUSP00000127616	Sycp3,Nasp,Cenpc1,Shprh,Smarca5,Cenpe,Nap1l4,Npm1,Hat1,H1fnt
GO:0034728	Nucleosome organization	8	116	0.73	0.022	1.65758	10090.ENSMUSP00000020252,10090.ENSMUSP00000030456,10090.ENSMUSP00000039422,10090.ENSMUSP00000044361,10090.ENSMUSP00000072510,10090.ENSMUSP00000075067,10090.ENSMUSP00000107750,10090.ENSMUSP00000127616	Sycp3,Nasp,Shprh,Smarca5,Nap1l4,Npm1,Hat1,H1fnt
GO:0060271	Cilium assembly	12	262	0.55	0.0253	1.59688	10090.ENSMUSP00000002444,10090.ENSMUSP00000034065,10090.ENSMUSP00000039709,10090.ENSMUSP00000042391,10090.ENSMUSP00000050962,10090.ENSMUSP00000101834,10090.ENSMUSP00000103690,10090.ENSMUSP00000114787,10090.ENSMUSP00000116629,10090.ENSMUSP00000118956,10090.ENSMUSP00000120314,10090.ENSMUSP00000134066	Rfx2,Nek1,Pcm1,Traf3ip1,Akap4,Cep131,Kif24,Ccdc13,Bbs9,Talpid3,Fsip2,Spag17
GO:0030261	Chromosome condensation	5	39	0.99	0.0261	1.58336	10090.ENSMUSP00000022793,10090.ENSMUSP00000051389,10090.ENSMUSP00000059385,10090.ENSMUSP00000059630,10090.ENSMUSP00000127616	Acin1,Akap8l,Nipbl,Prm3,H1fnt
GO:0051128	Regulation of cellular component organization	52	2438	0.22	0.0283	1.54821	10090.ENSMUSP00000001620,10090.ENSMUSP00000005620,10090.ENSMUSP00000006565,10090.ENSMUSP00000015800,10090.ENSMUSP00000018909,10090.ENSMUSP00000020649,10090.ENSMUSP00000022590,10090.ENSMUSP00000022682,10090.ENSMUSP00000022998,10090.ENSMUSP00000023206,10090.ENSMUSP00000025243,10090.ENSMUSP00000025930,10090.ENSMUSP00000027421,10090.ENSMUSP00000029879,10090.ENSMUSP00000030623,10090.ENSMUSP00000030636…	Fxr1,Dnajb1,Cdc20,Hspa8,Fxr2,Rad50,Dnajc15,Sorbs3,Mtbp,Ercc4,Iws1,Smc3,Trip12,Nbn,Sfpq,Stmn1,Katnb1,Ccar2,Slx4,Smg7,Traf3ip1,Smg6,Ttbk1,Phf2,Parp2,Fnip1,Akap8l,Setx,Tex14,Cenpe,Nipbl,Kiaa1109,Npm1,Hspa2,Eif4g3,Adnp,Morc2a,Hsp90aa1,Sirt1,Cep131,Usp47,Srcin1,Hnrnpc,C2cd5,Epb4.1l3,Mphosph8,Cdk5rap2,Myo9a,Mycbp2,H1fnt,Mark2,Nelfe
GO:2000113	Negative regulation of cellular macromolecule biosynthetic process	34	1370	0.28	0.0289	1.5391	10090.ENSMUSP00000001620,10090.ENSMUSP00000005620,10090.ENSMUSP00000015800,10090.ENSMUSP00000018909,10090.ENSMUSP00000022682,10090.ENSMUSP00000024657,10090.ENSMUSP00000026032,10090.ENSMUSP00000027438,10090.ENSMUSP00000027493,10090.ENSMUSP00000029170,10090.ENSMUSP00000030623,10090.ENSMUSP00000031092,10090.ENSMUSP00000034508,10090.ENSMUSP00000036924,10090.ENSMUSP00000042391,10090.ENSMUSP00000043583…	Fxr1,Dnajb1,Hspa8,Fxr2,Sorbs3,Phf10,Pcgf6,Ncl,Pask,Rbl1,Sfpq,Rfc1,Usp2,Ccar2,Traf3ip1,Bclaf1,Smarca5,Mael,Fnip1,Nipbl,Ilf3,Zfp608,Ddx20,Lig3,Grb10,Hdac1,Sirt1,Usp47,Hnrnpc,Hat1,Zfp318,Mphosph8,Uimc1,Nelfe
GO:0010557	Positive regulation of macromolecule biosynthetic process	42	1837	0.25	0.0297	1.52724	10090.ENSMUSP00000001620,10090.ENSMUSP00000002444,10090.ENSMUSP00000003818,10090.ENSMUSP00000003876,10090.ENSMUSP00000018909,10090.ENSMUSP00000023813,10090.ENSMUSP00000024657,10090.ENSMUSP00000025241,10090.ENSMUSP00000026032,10090.ENSMUSP00000027438,10090.ENSMUSP00000030033,10090.ENSMUSP00000030207,10090.ENSMUSP00000030623,10090.ENSMUSP00000031092,10090.ENSMUSP00000032918,10090.ENSMUSP00000036924…	Fxr1,Rfx2,Insig2,Brd8,Fxr2,Tarbp2,Phf10,Ercc3,Pcgf6,Ncl,Murc,Psip1,Sfpq,Rfc1,Pagr1a,Ccar2,Bclaf1,Smarca5,Camk4,Leo1,Phf2,Akap8l,Setx,Nipbl,Ilf3,Tceb2,Nup98,Npm1,Eif4g3,Tfam,Hsf5,Hsp90aa1,Hdac1,Sirt1,Rere,Spag8,Tcf20,Zfp318,Cdk5rap2,H1fnt,Nolc1,Nelfe
GO:0043412	Macromolecule modification	56	2700	0.2	0.0309	1.51004	10090.ENSMUSP00000003876,10090.ENSMUSP00000006565,10090.ENSMUSP00000010940,10090.ENSMUSP00000013338,10090.ENSMUSP00000015800,10090.ENSMUSP00000022612,10090.ENSMUSP00000024657,10090.ENSMUSP00000024779,10090.ENSMUSP00000025241,10090.ENSMUSP00000026032,10090.ENSMUSP00000027421,10090.ENSMUSP00000027493,10090.ENSMUSP00000027933,10090.ENSMUSP00000030623,10090.ENSMUSP00000031032,10090.ENSMUSP00000032918…	Brd8,Cdc20,Asz1,Arih2,Hspa8,Pbk,Phf10,Usp49,Ercc3,Pcgf6,Trip12,Pask,Dtl,Sfpq,Ppm1g,Pagr1a,Coprs,Nek1,Usp2,Nktr,Shprh,Msl1,Ttbk1,Mael,Camk4,Leo1,Phf2,Parp2,Alkbh5,Rbbp6,Setx,Tex14,Ilf3,Tceb2,Rsrc1,Cdyl,Prpf4b,Tdrd9,Ppm1b,Eya3,Grb10,Usp24,Ddx4,Hdac1,Sirt1,Mast2,Usp47,Brd1,Itch,Tdrd1,Hat1,Ube2j1,Uimc1,Usp10,Mycbp2,Mark2
GO:0045132	Meiotic chromosome segregation	7	93	0.76	0.0319	1.49621	10090.ENSMUSP00000020252,10090.ENSMUSP00000023206,10090.ENSMUSP00000031170,10090.ENSMUSP00000038871,10090.ENSMUSP00000045828,10090.ENSMUSP00000064465,10090.ENSMUSP00000108310	Sycp3,Ercc4,Cenpc1,Slx4,Mael,Espl1,Hfm1
GO:0040029	Regulation of gene expression, epigenetic	8	124	0.7	0.032	1.49485	10090.ENSMUSP00000026032,10090.ENSMUSP00000039133,10090.ENSMUSP00000074707,10090.ENSMUSP00000091087,10090.ENSMUSP00000101082,10090.ENSMUSP00000107750,10090.ENSMUSP00000112170,10090.ENSMUSP00000127616	Pcgf6,Ythdc1,Cdyl,Morc2a,Sirt1,Hat1,Mphosph8,H1fnt
GO:0050687	Negative regulation of defense response to virus	4	22	1.15	0.0327	1.48545	10090.ENSMUSP00000023813,10090.ENSMUSP00000042391,10090.ENSMUSP00000079107,10090.ENSMUSP00000105307	Tarbp2,Traf3ip1,Ppm1b,Itch
GO:0031503	Protein-containing complex localization	10	195	0.6	0.0338	1.47108	10090.ENSMUSP00000030623,10090.ENSMUSP00000034791,10090.ENSMUSP00000037788,10090.ENSMUSP00000039133,10090.ENSMUSP00000039709,10090.ENSMUSP00000042391,10090.ENSMUSP00000049116,10090.ENSMUSP00000075067,10090.ENSMUSP00000079379,10090.ENSMUSP00000101834	Sfpq,Lca5,Cep72,Ythdc1,Pcm1,Traf3ip1,Alkbh5,Npm1,Abce1,Cep131
GO:1990830	Cellular response to leukemia inhibitory factor	8	127	0.69	0.0366	1.43652	10090.ENSMUSP00000002444,10090.ENSMUSP00000020252,10090.ENSMUSP00000021824,10090.ENSMUSP00000027438,10090.ENSMUSP00000043583,10090.ENSMUSP00000044361,10090.ENSMUSP00000054444,10090.ENSMUSP00000101082	Rfx2,Sycp3,Nol8,Ncl,Bclaf1,Smarca5,Tex14,Sirt1
GO:0070925	Organelle assembly	20	642	0.38	0.0377	1.42366	10090.ENSMUSP00000002444,10090.ENSMUSP00000006565,10090.ENSMUSP00000029927,10090.ENSMUSP00000030033,10090.ENSMUSP00000031170,10090.ENSMUSP00000034065,10090.ENSMUSP00000037788,10090.ENSMUSP00000039709,10090.ENSMUSP00000042391,10090.ENSMUSP00000050962,10090.ENSMUSP00000057938,10090.ENSMUSP00000101834,10090.ENSMUSP00000103690,10090.ENSMUSP00000103825,10090.ENSMUSP00000114787,10090.ENSMUSP00000116629…	Rfx2,Cdc20,Spaca1,Murc,Cenpc1,Nek1,Cep72,Pcm1,Traf3ip1,Akap4,Cenpe,Cep131,Kif24,Wdr62,Ccdc13,Bbs9,Talpid3,Cdk5rap2,Fsip2,Spag17
GO:0006405	RNA export from nucleus	6	68	0.83	0.0378	1.42251	10090.ENSMUSP00000039133,10090.ENSMUSP00000049116,10090.ENSMUSP00000068530,10090.ENSMUSP00000075067,10090.ENSMUSP00000079379,10090.ENSMUSP00000084257	Ythdc1,Alkbh5,Nup98,Npm1,Abce1,Xpo5
GO:0009891	Positive regulation of biosynthetic process	44	1984	0.23	0.0378	1.42251	10090.ENSMUSP00000001620,10090.ENSMUSP00000002444,10090.ENSMUSP00000003818,10090.ENSMUSP00000003876,10090.ENSMUSP00000007800,10090.ENSMUSP00000018909,10090.ENSMUSP00000023813,10090.ENSMUSP00000024657,10090.ENSMUSP00000025241,10090.ENSMUSP00000026032,10090.ENSMUSP00000027438,10090.ENSMUSP00000030033,10090.ENSMUSP00000030207,10090.ENSMUSP00000030623,10090.ENSMUSP00000031092,10090.ENSMUSP00000032918…	Fxr1,Rfx2,Insig2,Brd8,Arpp19,Fxr2,Tarbp2,Phf10,Ercc3,Pcgf6,Ncl,Murc,Psip1,Sfpq,Rfc1,Pagr1a,Ccar2,Bclaf1,Smarca5,Suco,Camk4,Leo1,Phf2,Akap8l,Setx,Nipbl,Ilf3,Tceb2,Nup98,Npm1,Eif4g3,Tfam,Hsf5,Hsp90aa1,Hdac1,Sirt1,Rere,Spag8,Tcf20,Zfp318,Cdk5rap2,H1fnt,Nolc1,Nelfe
GO:0060968	Regulation of gene silencing	6	69	0.83	0.04	1.39794	10090.ENSMUSP00000001620,10090.ENSMUSP00000023813,10090.ENSMUSP00000045828,10090.ENSMUSP00000084257,10090.ENSMUSP00000101082,10090.ENSMUSP00000127616	Fxr1,Tarbp2,Mael,Xpo5,Sirt1,H1fnt
GO:0051254	Positive regulation of rna metabolic process	39	1696	0.25	0.0417	1.37986	10090.ENSMUSP00000002444,10090.ENSMUSP00000003818,10090.ENSMUSP00000003876,10090.ENSMUSP00000015800,10090.ENSMUSP00000024657,10090.ENSMUSP00000025241,10090.ENSMUSP00000026032,10090.ENSMUSP00000027438,10090.ENSMUSP00000030033,10090.ENSMUSP00000030207,10090.ENSMUSP00000030623,10090.ENSMUSP00000031092,10090.ENSMUSP00000032918,10090.ENSMUSP00000036924,10090.ENSMUSP00000043583,10090.ENSMUSP00000044361…	Rfx2,Insig2,Brd8,Hspa8,Phf10,Ercc3,Pcgf6,Ncl,Murc,Psip1,Sfpq,Rfc1,Pagr1a,Ccar2,Bclaf1,Smarca5,Camk4,Leo1,Phf2,Akap8l,Setx,Nipbl,Ilf3,Tceb2,Nup98,Npm1,Tfam,Hsf5,Hdac1,Sirt1,Rere,Spag8,Tcf20,Srsf5,Zfp318,Cdk5rap2,H1fnt,Nolc1,Nelfe
GO:0031328	Positive regulation of cellular biosynthetic process	43	1940	0.23	0.0433	1.36351	10090.ENSMUSP00000001620,10090.ENSMUSP00000002444,10090.ENSMUSP00000003818,10090.ENSMUSP00000003876,10090.ENSMUSP00000007800,10090.ENSMUSP00000018909,10090.ENSMUSP00000023813,10090.ENSMUSP00000024657,10090.ENSMUSP00000025241,10090.ENSMUSP00000026032,10090.ENSMUSP00000027438,10090.ENSMUSP00000030033,10090.ENSMUSP00000030207,10090.ENSMUSP00000030623,10090.ENSMUSP00000031092,10090.ENSMUSP00000032918…	Fxr1,Rfx2,Insig2,Brd8,Arpp19,Fxr2,Tarbp2,Phf10,Ercc3,Pcgf6,Ncl,Murc,Psip1,Sfpq,Rfc1,Pagr1a,Ccar2,Bclaf1,Smarca5,Camk4,Leo1,Phf2,Akap8l,Setx,Nipbl,Ilf3,Tceb2,Nup98,Npm1,Eif4g3,Tfam,Hsf5,Hsp90aa1,Hdac1,Sirt1,Rere,Spag8,Tcf20,Zfp318,Cdk5rap2,H1fnt,Nolc1,Nelfe
GO:0033120	Positive regulation of rna splicing	5	45	0.93	0.0433	1.36351	10090.ENSMUSP00000015800,10090.ENSMUSP00000027438,10090.ENSMUSP00000051492,10090.ENSMUSP00000068530,10090.ENSMUSP00000105985	Hspa8,Ncl,Setx,Nup98,Srsf5
GO:0006304	DNA modification	6	71	0.81	0.0446	1.35067	10090.ENSMUSP00000010940,10090.ENSMUSP00000045828,10090.ENSMUSP00000048877,10090.ENSMUSP00000078022,10090.ENSMUSP00000096769,10090.ENSMUSP00000107231	Asz1,Mael,Parp2,Tdrd9,Ddx4,Tdrd1
GO:0048523	Negative regulation of cellular process	85	4672	0.15	0.0452	1.34486	10090.ENSMUSP00000001620,10090.ENSMUSP00000003818,10090.ENSMUSP00000005503,10090.ENSMUSP00000005620,10090.ENSMUSP00000007800,10090.ENSMUSP00000015800,10090.ENSMUSP00000018909,10090.ENSMUSP00000020649,10090.ENSMUSP00000022590,10090.ENSMUSP00000022612,10090.ENSMUSP00000022682,10090.ENSMUSP00000022793,10090.ENSMUSP00000022998,10090.ENSMUSP00000023206,10090.ENSMUSP00000024657,10090.ENSMUSP00000026032…	Fxr1,Insig2,Msh6,Dnajb1,Arpp19,Hspa8,Fxr2,Rad50,Dnajc15,Pbk,Sorbs3,Acin1,Mtbp,Ercc4,Phf10,Pcgf6,Trip12,Ncl,Pask,Dtl,Api5,Rbl1,Nbn,Sfpq,Stmn1,Rgs12,Ppm1g,Rfc1,Katnb1,Usp2,Topbp1,Ccar2,Slx4,Pcm1,Psmf1,Traf3ip1,Smg6,Bclaf1,Smarca5,Atrip,Mael,Rbbp8,Leo1,Phf2,Parp2,Fnip1,Setx,Fscb,Tex14,Cenpe,Nipbl,Ppp1r2,Ilf3,Zfp608,Cdyl,Npm1,Tdrd9,Ppm1b,Hspa2,Abce1,Sycp2,Eya3,Adnp,Ddx20,Lig3,Grb10,Ddx4,Hdac1,Osbpl8,…

## Sheet: Q3_4 hr Ontology
#term ID	term description	observed gene count	background gene count	strength	false discovery rate	"-LOG10(FDR)"	matching proteins in your network (IDs)	matching proteins in your network (labels)
GO:0009987	Cellular process	160	13330	0.17	4.57e-13	12.3401	10090.ENSMUSP00000004622,10090.ENSMUSP00000004684,10090.ENSMUSP00000005188,10090.ENSMUSP00000009699,10090.ENSMUSP00000009713,10090.ENSMUSP00000013773,10090.ENSMUSP00000019076,10090.ENSMUSP00000020461,10090.ENSMUSP00000021381,10090.ENSMUSP00000022327,10090.ENSMUSP00000022698,10090.ENSMUSP00000022865,10090.ENSMUSP00000023151,10090.ENSMUSP00000023507,10090.ENSMUSP00000024786,10090.ENSMUSP00000025127…	Gab2,Arhgef18,Sh2b2,Cdk9,Mkl2,Cad,Map2k3,Nfic,Pnn,Ldb3,Dok2,Mtdh,Bcl6,Gsk3b,Tfeb,Mapre2,Dock8,Cbx8,Gorasp2,Arfgap1,Nmd3,Slc33a1,Ssr3,Vcam1,Abca1,Dock7,Rragc,Ugdh,Cbx3,Xpc,Atf7ip,Bag3,Eif4ebp1,Rrad,Pgm5,Reep2,Git1,Bmp2k,Emsy,Esyt3,Fam21,Snx2,Pkn2,Irf2bpl,Cldn5,Rundc1,Oxsr1,Gtf3c4,Fcho2,Srrt,Med13,Thoc2,Myof,Trappc11,Ptpn13,Mtss1l,Wdfy3,Pard6b,Basp1,Ppapdc3,Marcksl1,Golph3,Fbxo10,Bod1l,Chd4,Irf2bp1…
GO:0006996	Organelle organization	68	3066	0.43	1.97e-11	10.7055	10090.ENSMUSP00000004684,10090.ENSMUSP00000005188,10090.ENSMUSP00000009713,10090.ENSMUSP00000022327,10090.ENSMUSP00000023151,10090.ENSMUSP00000023507,10090.ENSMUSP00000024786,10090.ENSMUSP00000025127,10090.ENSMUSP00000026663,10090.ENSMUSP00000028509,10090.ENSMUSP00000030010,10090.ENSMUSP00000030286,10090.ENSMUSP00000031862,10090.ENSMUSP00000032182,10090.ENSMUSP00000033136,10090.ENSMUSP00000036025…	Arhgef18,Sh2b2,Mkl2,Ldb3,Bcl6,Gsk3b,Tfeb,Mapre2,Cbx8,Gorasp2,Abca1,Dock7,Cbx3,Xpc,Bag3,Pgm5,Reep2,Git1,Emsy,Esyt3,Gtf3c4,Trappc11,Pard6b,Golph3,Chd4,Eea1,Lmod1,Nucks1,Gfap,Ubap2l,Iqgap2,Rab31,Map1b,Nup98,Xrcc6,Ppp1r12a,Pvrl2,Plec,Mical3,Htt,Pml,Sipa1l3,Chd8,Myh11,Map1a,Spin1,Iqsec2,Ehd2,Epb4.1l1,Cds2,Mtor,Trpm7,Phactr4,Ehmt1,Synpo2,Cgn,Kmt2b,Wdhd1,Rif1,Atrx,Ssh3,Cfl1,Lcp1,Sik3,Sorbs2,Chd2,Clasp2,…
GO:0071840	Cellular component organization or biogenesis	89	4954	0.34	1.97e-11	10.7055	10090.ENSMUSP00000004684,10090.ENSMUSP00000005188,10090.ENSMUSP00000009713,10090.ENSMUSP00000022327,10090.ENSMUSP00000022865,10090.ENSMUSP00000023151,10090.ENSMUSP00000023507,10090.ENSMUSP00000024786,10090.ENSMUSP00000025127,10090.ENSMUSP00000026663,10090.ENSMUSP00000028509,10090.ENSMUSP00000029358,10090.ENSMUSP00000030010,10090.ENSMUSP00000030286,10090.ENSMUSP00000031103,10090.ENSMUSP00000031862…	Arhgef18,Sh2b2,Mkl2,Ldb3,Mtdh,Bcl6,Gsk3b,Tfeb,Mapre2,Cbx8,Gorasp2,Nmd3,Abca1,Dock7,Ugdh,Cbx3,Xpc,Bag3,Pgm5,Reep2,Git1,Emsy,Esyt3,Snx2,Pkn2,Cldn5,Gtf3c4,Fcho2,Myof,Trappc11,Mtss1l,Pard6b,Golph3,Chd4,Eea1,Lmod1,Nucks1,Gfap,Ubap2l,Iqgap2,Rab31,Map1b,Nup98,Xrcc6,Ppp1r12a,Pvrl2,Plec,Mical3,Htt,Golga4,Pml,Tecpr1,Sipa1l3,Glul,Chd8,Trio,Myh11,Map1a,Spin1,Iqsec2,Tsc2,Ppfibp2,Znhit6,Ehd2,Epb4.1l1,Cds2,Mtor…
GO:0016043	Cellular component organization	85	4769	0.34	1.53e-10	9.81531	10090.ENSMUSP00000004684,10090.ENSMUSP00000005188,10090.ENSMUSP00000009713,10090.ENSMUSP00000022327,10090.ENSMUSP00000022865,10090.ENSMUSP00000023151,10090.ENSMUSP00000023507,10090.ENSMUSP00000024786,10090.ENSMUSP00000025127,10090.ENSMUSP00000026663,10090.ENSMUSP00000028509,10090.ENSMUSP00000030010,10090.ENSMUSP00000030286,10090.ENSMUSP00000031103,10090.ENSMUSP00000031862,10090.ENSMUSP00000032182…	Arhgef18,Sh2b2,Mkl2,Ldb3,Mtdh,Bcl6,Gsk3b,Tfeb,Mapre2,Cbx8,Gorasp2,Abca1,Dock7,Ugdh,Cbx3,Xpc,Bag3,Pgm5,Reep2,Git1,Emsy,Esyt3,Snx2,Pkn2,Cldn5,Gtf3c4,Fcho2,Myof,Trappc11,Mtss1l,Pard6b,Golph3,Chd4,Eea1,Lmod1,Nucks1,Gfap,Ubap2l,Iqgap2,Rab31,Map1b,Nup98,Xrcc6,Ppp1r12a,Pvrl2,Plec,Mical3,Htt,Golga4,Pml,Tecpr1,Sipa1l3,Chd8,Trio,Myh11,Map1a,Spin1,Iqsec2,Tsc2,Ppfibp2,Znhit6,Ehd2,Epb4.1l1,Cds2,Mtor,Trpm7,Pha…
GO:0007010	Cytoskeleton organization	36	1064	0.62	2.03e-09	8.6925	10090.ENSMUSP00000004684,10090.ENSMUSP00000005188,10090.ENSMUSP00000009713,10090.ENSMUSP00000022327,10090.ENSMUSP00000023151,10090.ENSMUSP00000023507,10090.ENSMUSP00000025127,10090.ENSMUSP00000030286,10090.ENSMUSP00000036025,10090.ENSMUSP00000052619,10090.ENSMUSP00000061597,10090.ENSMUSP00000064691,10090.ENSMUSP00000067685,10090.ENSMUSP00000068374,10090.ENSMUSP00000069257,10090.ENSMUSP00000074898…	Arhgef18,Sh2b2,Mkl2,Ldb3,Bcl6,Gsk3b,Mapre2,Dock7,Pgm5,Pard6b,Lmod1,Gfap,Iqgap2,Map1b,Ppp1r12a,Pvrl2,Plec,Mical3,Htt,Sipa1l3,Myh11,Map1a,Iqsec2,Ehd2,Epb4.1l1,Trpm7,Phactr4,Cgn,Atrx,Ssh3,Cfl1,Lcp1,Sik3,Sorbs2,Clasp2,Myo18a
GO:0065007	Biological regulation	134	10591	0.19	2.03e-09	8.6925	10090.ENSMUSP00000004622,10090.ENSMUSP00000004684,10090.ENSMUSP00000005188,10090.ENSMUSP00000009699,10090.ENSMUSP00000009713,10090.ENSMUSP00000013773,10090.ENSMUSP00000014421,10090.ENSMUSP00000019076,10090.ENSMUSP00000020208,10090.ENSMUSP00000020461,10090.ENSMUSP00000022698,10090.ENSMUSP00000022865,10090.ENSMUSP00000023151,10090.ENSMUSP00000023507,10090.ENSMUSP00000024786,10090.ENSMUSP00000025127…	Gab2,Arhgef18,Sh2b2,Cdk9,Mkl2,Cad,Ankrd17,Map2k3,Fgd6,Nfic,Dok2,Mtdh,Bcl6,Gsk3b,Tfeb,Mapre2,Dock8,Cbx8,Arfgap1,Nmd3,Slc33a1,Vcam1,Abca1,Dock7,Rragc,Cbx3,Xpc,Atf7ip,Bag3,Eif4ebp1,Rrad,Reep2,Git1,Bmp2k,Emsy,Pkn2,Irf2bpl,Cldn5,Rundc1,Oxsr1,Srrt,Med13,Thoc2,Myof,Trappc11,Ptpn13,Mtss1l,Pard6b,Basp1,Ppapdc3,Marcksl1,Golph3,Fbxo10,Bod1l,Chd4,Irf2bp1,Lmod1,Nucks1,Syncrip,Gfap,Ubap2l,Ppm1h,Iqgap2,Rab31,Ma…
GO:0050794	Regulation of cellular process	125	9541	0.21	3.74e-09	8.42713	10090.ENSMUSP00000004622,10090.ENSMUSP00000004684,10090.ENSMUSP00000005188,10090.ENSMUSP00000009699,10090.ENSMUSP00000009713,10090.ENSMUSP00000014421,10090.ENSMUSP00000019076,10090.ENSMUSP00000020461,10090.ENSMUSP00000022698,10090.ENSMUSP00000022865,10090.ENSMUSP00000023151,10090.ENSMUSP00000023507,10090.ENSMUSP00000024786,10090.ENSMUSP00000025127,10090.ENSMUSP00000025831,10090.ENSMUSP00000026663…	Gab2,Arhgef18,Sh2b2,Cdk9,Mkl2,Ankrd17,Map2k3,Nfic,Dok2,Mtdh,Bcl6,Gsk3b,Tfeb,Mapre2,Dock8,Cbx8,Arfgap1,Nmd3,Slc33a1,Vcam1,Abca1,Dock7,Rragc,Cbx3,Xpc,Atf7ip,Bag3,Eif4ebp1,Rrad,Reep2,Git1,Bmp2k,Emsy,Pkn2,Irf2bpl,Cldn5,Oxsr1,Srrt,Med13,Thoc2,Myof,Ptpn13,Pard6b,Basp1,Ppapdc3,Marcksl1,Golph3,Fbxo10,Bod1l,Chd4,Irf2bp1,Lmod1,Nucks1,Syncrip,Gfap,Iqgap2,Rab31,Map1b,Nup98,Xrcc6,Serpinc1,Ppp1r12a,Bcl9l,Pvrl2…
GO:0050789	Regulation of biological process	126	9973	0.19	4.34e-08	7.36251	10090.ENSMUSP00000004622,10090.ENSMUSP00000004684,10090.ENSMUSP00000005188,10090.ENSMUSP00000009699,10090.ENSMUSP00000009713,10090.ENSMUSP00000014421,10090.ENSMUSP00000019076,10090.ENSMUSP00000020461,10090.ENSMUSP00000022698,10090.ENSMUSP00000022865,10090.ENSMUSP00000023151,10090.ENSMUSP00000023507,10090.ENSMUSP00000024786,10090.ENSMUSP00000025127,10090.ENSMUSP00000025831,10090.ENSMUSP00000026663…	Gab2,Arhgef18,Sh2b2,Cdk9,Mkl2,Ankrd17,Map2k3,Nfic,Dok2,Mtdh,Bcl6,Gsk3b,Tfeb,Mapre2,Dock8,Cbx8,Arfgap1,Nmd3,Slc33a1,Vcam1,Abca1,Dock7,Rragc,Cbx3,Xpc,Atf7ip,Bag3,Eif4ebp1,Rrad,Reep2,Git1,Bmp2k,Emsy,Pkn2,Irf2bpl,Cldn5,Oxsr1,Srrt,Med13,Thoc2,Myof,Ptpn13,Pard6b,Basp1,Ppapdc3,Marcksl1,Golph3,Fbxo10,Bod1l,Chd4,Irf2bp1,Lmod1,Nucks1,Syncrip,Gfap,Ppm1h,Iqgap2,Rab31,Map1b,Nup98,Xrcc6,Serpinc1,Ppp1r12a,Bcl9l…
GO:0048518	Positive regulation of biological process	87	5869	0.26	9.58e-07	6.01863	10090.ENSMUSP00000004622,10090.ENSMUSP00000005188,10090.ENSMUSP00000009699,10090.ENSMUSP00000009713,10090.ENSMUSP00000014421,10090.ENSMUSP00000019076,10090.ENSMUSP00000020461,10090.ENSMUSP00000022865,10090.ENSMUSP00000023151,10090.ENSMUSP00000023507,10090.ENSMUSP00000024786,10090.ENSMUSP00000025127,10090.ENSMUSP00000025831,10090.ENSMUSP00000026663,10090.ENSMUSP00000029358,10090.ENSMUSP00000029574…	Gab2,Sh2b2,Cdk9,Mkl2,Ankrd17,Map2k3,Nfic,Mtdh,Bcl6,Gsk3b,Tfeb,Mapre2,Dock8,Cbx8,Nmd3,Vcam1,Abca1,Dock7,Rragc,Xpc,Atf7ip,Bag3,Eif4ebp1,Git1,Bmp2k,Pkn2,Irf2bpl,Cldn5,Oxsr1,Srrt,Med13,Marcksl1,Golph3,Lmod1,Nucks1,Syncrip,Gfap,Ppm1h,Iqgap2,Rab31,Map1b,Nup98,Xrcc6,Ppp1r12a,Bcl9l,Pvrl2,Htt,Golga4,Pml,Glul,Chd8,Trappc9,Fyb,Sept9,Dennd1b,Map1a,Spin1,Iqsec2,Tsc2,Ehd2,Foxs1,Mtor,Trpm7,Trim44,Eps15,Rps6,Ehm…
GO:0030029	Actin filament-based process	21	551	0.67	1.42e-05	4.84771	10090.ENSMUSP00000004684,10090.ENSMUSP00000005188,10090.ENSMUSP00000009713,10090.ENSMUSP00000022327,10090.ENSMUSP00000023151,10090.ENSMUSP00000036025,10090.ENSMUSP00000061597,10090.ENSMUSP00000067685,10090.ENSMUSP00000076402,10090.ENSMUSP00000087756,10090.ENSMUSP00000093995,10090.ENSMUSP00000096397,10090.ENSMUSP00000099425,10090.ENSMUSP00000099513,10090.ENSMUSP00000099628,10090.ENSMUSP00000102009…	Arhgef18,Sh2b2,Mkl2,Ldb3,Bcl6,Pgm5,Lmod1,Iqgap2,Mical3,Myh11,Iqsec2,Ehd2,Epb4.1l1,Trpm7,Phactr4,Camk2d,Ssh3,Cfl1,Lcp1,Sorbs2,Myo18a
GO:0030036	Actin cytoskeleton organization	20	496	0.69	1.42e-05	4.84771	10090.ENSMUSP00000004684,10090.ENSMUSP00000005188,10090.ENSMUSP00000009713,10090.ENSMUSP00000022327,10090.ENSMUSP00000023151,10090.ENSMUSP00000036025,10090.ENSMUSP00000061597,10090.ENSMUSP00000067685,10090.ENSMUSP00000076402,10090.ENSMUSP00000087756,10090.ENSMUSP00000093995,10090.ENSMUSP00000096397,10090.ENSMUSP00000099425,10090.ENSMUSP00000099513,10090.ENSMUSP00000099628,10090.ENSMUSP00000109483…	Arhgef18,Sh2b2,Mkl2,Ldb3,Bcl6,Pgm5,Lmod1,Iqgap2,Mical3,Myh11,Iqsec2,Ehd2,Epb4.1l1,Trpm7,Phactr4,Ssh3,Cfl1,Lcp1,Sorbs2,Myo18a
GO:0048522	Positive regulation of cellular process	79	5407	0.25	1.86e-05	4.73049	10090.ENSMUSP00000004622,10090.ENSMUSP00000009699,10090.ENSMUSP00000009713,10090.ENSMUSP00000014421,10090.ENSMUSP00000019076,10090.ENSMUSP00000020461,10090.ENSMUSP00000022865,10090.ENSMUSP00000023151,10090.ENSMUSP00000023507,10090.ENSMUSP00000024786,10090.ENSMUSP00000025127,10090.ENSMUSP00000025831,10090.ENSMUSP00000026663,10090.ENSMUSP00000029358,10090.ENSMUSP00000029574,10090.ENSMUSP00000030010…	Gab2,Cdk9,Mkl2,Ankrd17,Map2k3,Nfic,Mtdh,Bcl6,Gsk3b,Tfeb,Mapre2,Dock8,Cbx8,Nmd3,Vcam1,Abca1,Dock7,Rragc,Xpc,Atf7ip,Bag3,Eif4ebp1,Git1,Bmp2k,Pkn2,Irf2bpl,Cldn5,Oxsr1,Srrt,Med13,Marcksl1,Golph3,Lmod1,Nucks1,Gfap,Iqgap2,Rab31,Map1b,Nup98,Xrcc6,Ppp1r12a,Bcl9l,Pvrl2,Htt,Golga4,Pml,Glul,Chd8,Sept9,Map1a,Spin1,Iqsec2,Tsc2,Ehd2,Mtor,Trpm7,Trim44,Eps15,Rps6,Camk2d,Synpo2,Trim25,Kmt2b,Tnks1bp1,Steap3,Rif1,A…
GO:0043087	Regulation of gtpase activity	18	418	0.72	2.44e-05	4.61261	10090.ENSMUSP00000020208,10090.ENSMUSP00000023151,10090.ENSMUSP00000023507,10090.ENSMUSP00000025127,10090.ENSMUSP00000025831,10090.ENSMUSP00000029092,10090.ENSMUSP00000030286,10090.ENSMUSP00000037210,10090.ENSMUSP00000042151,10090.ENSMUSP00000050211,10090.ENSMUSP00000067685,10090.ENSMUSP00000082965,10090.ENSMUSP00000092082,10090.ENSMUSP00000094986,10090.ENSMUSP00000099510,10090.ENSMUSP00000110611…	Fgd6,Bcl6,Gsk3b,Mapre2,Dock8,Arfgap1,Dock7,Git1,Rundc1,Mtss1l,Iqgap2,Sipa1l3,Dennd1b,Tsc2,Mtor,Kalrn,Rangap1,Arhgap32
GO:0051641	Cellular localization	43	2115	0.4	2.46e-05	4.60906	10090.ENSMUSP00000023507,10090.ENSMUSP00000024786,10090.ENSMUSP00000025127,10090.ENSMUSP00000028509,10090.ENSMUSP00000029358,10090.ENSMUSP00000029414,10090.ENSMUSP00000030010,10090.ENSMUSP00000030286,10090.ENSMUSP00000036065,10090.ENSMUSP00000037210,10090.ENSMUSP00000038757,10090.ENSMUSP00000038983,10090.ENSMUSP00000039243,10090.ENSMUSP00000042151,10090.ENSMUSP00000042959,10090.ENSMUSP00000044677…	Gsk3b,Tfeb,Mapre2,Gorasp2,Nmd3,Ssr3,Abca1,Dock7,Reep2,Git1,Esyt3,Fam21,Snx2,Rundc1,Fcho2,Thoc2,Trappc11,Golph3,Rab31,Map1b,Nup98,Cope,Pvrl2,Htt,Dennd4c,Golga4,Pml,Fyb,Sept9,Dennd1b,Map1a,Tsc2,Ehd2,Mtor,Eps15,Lrba,Kif1a,Atrx,Kalrn,Cfl1,Akap13,Rangap1,Clasp2
GO:0051716	Cellular response to stimulus	79	5497	0.25	3.19e-05	4.49621	10090.ENSMUSP00000004622,10090.ENSMUSP00000004684,10090.ENSMUSP00000005188,10090.ENSMUSP00000009699,10090.ENSMUSP00000013773,10090.ENSMUSP00000019076,10090.ENSMUSP00000022698,10090.ENSMUSP00000022865,10090.ENSMUSP00000023151,10090.ENSMUSP00000023507,10090.ENSMUSP00000024786,10090.ENSMUSP00000025831,10090.ENSMUSP00000026663,10090.ENSMUSP00000028509,10090.ENSMUSP00000029402,10090.ENSMUSP00000029574…	Gab2,Arhgef18,Sh2b2,Cdk9,Cad,Map2k3,Dok2,Mtdh,Bcl6,Gsk3b,Tfeb,Dock8,Cbx8,Gorasp2,Slc33a1,Vcam1,Abca1,Dock7,Rragc,Cbx3,Xpc,Bag3,Eif4ebp1,Rrad,Git1,Emsy,Pkn2,Cldn5,Oxsr1,Myof,Mtss1l,Golph3,Bod1l,Nucks1,Syncrip,Gfap,Iqgap2,Rab31,Map1b,Xrcc6,Ppp1r12a,Bcl9l,Htt,Dennd4c,Pml,Glul,Chd8,Fyb,Dennd1b,Spin1,Tsc2,Cds2,Mtor,Phactr4,Rps6,Lrba,Trim25,Tnks1bp1,Wdhd1,Rif1,Atrx,Kalrn,Cfl1,Cbx5,Adcy9,Fam129a,Lcp1,Ak…
GO:0051056	Regulation of small gtpase mediated signal transduction	13	214	0.87	4.87e-05	4.31247	10090.ENSMUSP00000004684,10090.ENSMUSP00000005188,10090.ENSMUSP00000023151,10090.ENSMUSP00000025127,10090.ENSMUSP00000029092,10090.ENSMUSP00000030010,10090.ENSMUSP00000037210,10090.ENSMUSP00000082965,10090.ENSMUSP00000093995,10090.ENSMUSP00000094986,10090.ENSMUSP00000102009,10090.ENSMUSP00000110611,10090.ENSMUSP00000117686	Arhgef18,Sh2b2,Bcl6,Mapre2,Arfgap1,Abca1,Git1,Sipa1l3,Iqsec2,Tsc2,Camk2d,Kalrn,Akap13
GO:0051179	Localization	70	4646	0.27	4.87e-05	4.31247	10090.ENSMUSP00000004622,10090.ENSMUSP00000009713,10090.ENSMUSP00000013773,10090.ENSMUSP00000023151,10090.ENSMUSP00000023507,10090.ENSMUSP00000024786,10090.ENSMUSP00000025127,10090.ENSMUSP00000025831,10090.ENSMUSP00000028509,10090.ENSMUSP00000029092,10090.ENSMUSP00000029358,10090.ENSMUSP00000029402,10090.ENSMUSP00000029414,10090.ENSMUSP00000029574,10090.ENSMUSP00000030010,10090.ENSMUSP00000030286…	Gab2,Mkl2,Cad,Bcl6,Gsk3b,Tfeb,Mapre2,Dock8,Gorasp2,Arfgap1,Nmd3,Slc33a1,Ssr3,Vcam1,Abca1,Dock7,Reep2,Git1,Esyt3,Fam21,Snx2,Pkn2,Rundc1,Fcho2,Thoc2,Trappc11,Marcksl1,Golph3,Eea1,Rab31,Map1b,Nup98,Serpinc1,Cope,Ubap1,Pvrl2,Mical3,Htt,Dennd4c,Fkbp15,Golga4,Pml,Fyb,Sept9,Dennd1b,Map1a,Tsc2,Znhit6,Ehd2,Slc7a2,Cds2,Mtor,Trpm7,Phactr4,Eps15,Camk2d,Lrba,Steap3,Kif1a,Atrx,Kalrn,Cfl1,Lcp1,Akap13,Pitpnm2,Ra…
GO:0033036	Macromolecule localization	43	2198	0.38	5.7e-05	4.24413	10090.ENSMUSP00000023151,10090.ENSMUSP00000023507,10090.ENSMUSP00000025127,10090.ENSMUSP00000028509,10090.ENSMUSP00000029092,10090.ENSMUSP00000029358,10090.ENSMUSP00000029414,10090.ENSMUSP00000030010,10090.ENSMUSP00000036065,10090.ENSMUSP00000037210,10090.ENSMUSP00000038757,10090.ENSMUSP00000038983,10090.ENSMUSP00000039243,10090.ENSMUSP00000042151,10090.ENSMUSP00000042959,10090.ENSMUSP00000044677…	Bcl6,Gsk3b,Mapre2,Gorasp2,Arfgap1,Nmd3,Ssr3,Abca1,Reep2,Git1,Esyt3,Fam21,Snx2,Rundc1,Fcho2,Thoc2,Golph3,Rab31,Nup98,Cope,Ubap1,Htt,Dennd4c,Golga4,Pml,Fyb,Sept9,Dennd1b,Map1a,Tsc2,Znhit6,Ehd2,Cds2,Eps15,Lrba,Steap3,Kif1a,Atrx,Kalrn,Cfl1,Pitpnm2,Rangap1,Clasp2
GO:0008104	Protein localization	39	1890	0.4	6.71e-05	4.17328	10090.ENSMUSP00000023151,10090.ENSMUSP00000023507,10090.ENSMUSP00000025127,10090.ENSMUSP00000028509,10090.ENSMUSP00000029092,10090.ENSMUSP00000029358,10090.ENSMUSP00000029414,10090.ENSMUSP00000030010,10090.ENSMUSP00000036065,10090.ENSMUSP00000037210,10090.ENSMUSP00000038983,10090.ENSMUSP00000039243,10090.ENSMUSP00000042151,10090.ENSMUSP00000042959,10090.ENSMUSP00000044677,10090.ENSMUSP00000057375…	Bcl6,Gsk3b,Mapre2,Gorasp2,Arfgap1,Nmd3,Ssr3,Abca1,Reep2,Git1,Fam21,Snx2,Rundc1,Fcho2,Thoc2,Golph3,Rab31,Nup98,Cope,Ubap1,Htt,Dennd4c,Golga4,Pml,Fyb,Sept9,Dennd1b,Map1a,Tsc2,Ehd2,Eps15,Lrba,Steap3,Kif1a,Atrx,Kalrn,Cfl1,Rangap1,Clasp2
GO:0033554	Cellular response to stress	33	1493	0.43	0.00017	3.76955	10090.ENSMUSP00000009699,10090.ENSMUSP00000019076,10090.ENSMUSP00000023151,10090.ENSMUSP00000023507,10090.ENSMUSP00000024786,10090.ENSMUSP00000026663,10090.ENSMUSP00000028509,10090.ENSMUSP00000030399,10090.ENSMUSP00000031862,10090.ENSMUSP00000032182,10090.ENSMUSP00000033136,10090.ENSMUSP00000033880,10090.ENSMUSP00000038216,10090.ENSMUSP00000042155,10090.ENSMUSP00000045036,10090.ENSMUSP00000058618…	Cdk9,Map2k3,Bcl6,Gsk3b,Tfeb,Cbx8,Gorasp2,Rragc,Cbx3,Xpc,Bag3,Eif4ebp1,Emsy,Oxsr1,Myof,Bod1l,Nucks1,Gfap,Map1b,Xrcc6,Pml,Glul,Mtor,Trim25,Tnks1bp1,Wdhd1,Rif1,Atrx,Cfl1,Cbx5,Fam129a,Hipk2,Chd2
GO:0034613	Cellular protein localization	31	1392	0.44	0.00034	3.46852	10090.ENSMUSP00000023507,10090.ENSMUSP00000025127,10090.ENSMUSP00000028509,10090.ENSMUSP00000029358,10090.ENSMUSP00000029414,10090.ENSMUSP00000036065,10090.ENSMUSP00000037210,10090.ENSMUSP00000038983,10090.ENSMUSP00000039243,10090.ENSMUSP00000042151,10090.ENSMUSP00000042959,10090.ENSMUSP00000044677,10090.ENSMUSP00000057375,10090.ENSMUSP00000068195,10090.ENSMUSP00000068530,10090.ENSMUSP00000078945…	Gsk3b,Mapre2,Gorasp2,Nmd3,Ssr3,Reep2,Git1,Fam21,Snx2,Rundc1,Fcho2,Thoc2,Golph3,Rab31,Nup98,Htt,Dennd4c,Golga4,Pml,Fyb,Sept9,Map1a,Tsc2,Ehd2,Eps15,Kif1a,Atrx,Kalrn,Cfl1,Rangap1,Clasp2
GO:0048519	Negative regulation of biological process	72	5108	0.24	0.00034	3.46852	10090.ENSMUSP00000004684,10090.ENSMUSP00000005188,10090.ENSMUSP00000009699,10090.ENSMUSP00000014421,10090.ENSMUSP00000020461,10090.ENSMUSP00000022698,10090.ENSMUSP00000022865,10090.ENSMUSP00000023151,10090.ENSMUSP00000023507,10090.ENSMUSP00000025831,10090.ENSMUSP00000026663,10090.ENSMUSP00000030286,10090.ENSMUSP00000031862,10090.ENSMUSP00000032182,10090.ENSMUSP00000032335,10090.ENSMUSP00000033136…	Arhgef18,Sh2b2,Cdk9,Ankrd17,Nfic,Dok2,Mtdh,Bcl6,Gsk3b,Dock8,Cbx8,Dock7,Cbx3,Xpc,Atf7ip,Bag3,Eif4ebp1,Rrad,Git1,Irf2bpl,Cldn5,Oxsr1,Srrt,Med13,Thoc2,Ptpn13,Basp1,Ppapdc3,Golph3,Bod1l,Chd4,Irf2bp1,Lmod1,Nucks1,Syncrip,Gfap,Map1b,Xrcc6,Serpinc1,Bcl9l,Htt,Fkbp15,Pml,Chd8,Trio,Map1a,Tsc2,Foxs1,Mtor,Phactr4,Trim44,Rps6,Ehmt1,Camk2d,Trim25,Kmt2b,Wdhd1,Rif1,Atrx,Ssh3,Kalrn,Cfl1,Cbx5,Fam129a,Hipk2,Cic,Ran…
GO:0046578	Regulation of ras protein signal transduction	11	182	0.87	0.00038	3.42022	10090.ENSMUSP00000004684,10090.ENSMUSP00000005188,10090.ENSMUSP00000023151,10090.ENSMUSP00000025127,10090.ENSMUSP00000029092,10090.ENSMUSP00000030010,10090.ENSMUSP00000037210,10090.ENSMUSP00000093995,10090.ENSMUSP00000102009,10090.ENSMUSP00000110611,10090.ENSMUSP00000117686	Arhgef18,Sh2b2,Bcl6,Mapre2,Arfgap1,Abca1,Git1,Iqsec2,Camk2d,Kalrn,Akap13
GO:0055002	Striated muscle cell development	10	150	0.91	0.00053	3.27572	10090.ENSMUSP00000022327,10090.ENSMUSP00000023507,10090.ENSMUSP00000036025,10090.ENSMUSP00000045036,10090.ENSMUSP00000061597,10090.ENSMUSP00000087756,10090.ENSMUSP00000099510,10090.ENSMUSP00000102009,10090.ENSMUSP00000117686,10090.ENSMUSP00000121619	Ldb3,Gsk3b,Pgm5,Myof,Lmod1,Myh11,Mtor,Camk2d,Akap13,Sorbs2
GO:0065009	Regulation of molecular function	64	4379	0.25	0.00053	3.27572	10090.ENSMUSP00000004684,10090.ENSMUSP00000009699,10090.ENSMUSP00000009713,10090.ENSMUSP00000019076,10090.ENSMUSP00000020208,10090.ENSMUSP00000020461,10090.ENSMUSP00000022865,10090.ENSMUSP00000023151,10090.ENSMUSP00000023507,10090.ENSMUSP00000024786,10090.ENSMUSP00000025127,10090.ENSMUSP00000025831,10090.ENSMUSP00000026663,10090.ENSMUSP00000029092,10090.ENSMUSP00000029358,10090.ENSMUSP00000030286…	Arhgef18,Cdk9,Mkl2,Map2k3,Fgd6,Nfic,Mtdh,Bcl6,Gsk3b,Tfeb,Mapre2,Dock8,Cbx8,Arfgap1,Nmd3,Dock7,Xpc,Atf7ip,Bag3,Rrad,Git1,Bmp2k,Irf2bpl,Cldn5,Rundc1,Oxsr1,Med13,Mtss1l,Basp1,Bod1l,Irf2bp1,Nucks1,Ppm1h,Iqgap2,Nup98,Xrcc6,Serpinc1,Ppp1r12a,Bcl9l,Htt,Dennd4c,Fkbp15,Pml,Sipa1l3,Trappc9,Trio,Arhgef40,Dennd1b,Iqsec2,Tsc2,Foxs1,Mtor,Phactr4,Camk2d,Synpo2,Trim25,Kalrn,Cfl1,Akap13,Hipk2,Rangap1,Trps1,Arhgap…
GO:0007163	Establishment or maintenance of cell polarity	11	199	0.83	0.00078	3.10791	10090.ENSMUSP00000023507,10090.ENSMUSP00000030286,10090.ENSMUSP00000052619,10090.ENSMUSP00000057375,10090.ENSMUSP00000068374,10090.ENSMUSP00000078945,10090.ENSMUSP00000082965,10090.ENSMUSP00000094986,10090.ENSMUSP00000112259,10090.ENSMUSP00000128460,10090.ENSMUSP00000130696	Gsk3b,Dock7,Pard6b,Golph3,Map1b,Htt,Sipa1l3,Tsc2,Cfl1,Clasp2,Myo18a
GO:1990778	Protein localization to cell periphery	12	247	0.77	0.00089	3.05061	10090.ENSMUSP00000028509,10090.ENSMUSP00000037210,10090.ENSMUSP00000042959,10090.ENSMUSP00000057375,10090.ENSMUSP00000068195,10090.ENSMUSP00000080685,10090.ENSMUSP00000081880,10090.ENSMUSP00000087947,10090.ENSMUSP00000094986,10090.ENSMUSP00000096397,10090.ENSMUSP00000110611,10090.ENSMUSP00000128460	Gorasp2,Git1,Fcho2,Golph3,Rab31,Dennd4c,Golga4,Fyb,Tsc2,Ehd2,Kalrn,Clasp2
GO:0048523	Negative regulation of cellular process	66	4672	0.24	0.00096	3.01773	10090.ENSMUSP00000004684,10090.ENSMUSP00000005188,10090.ENSMUSP00000009699,10090.ENSMUSP00000014421,10090.ENSMUSP00000020461,10090.ENSMUSP00000022698,10090.ENSMUSP00000022865,10090.ENSMUSP00000023151,10090.ENSMUSP00000023507,10090.ENSMUSP00000025831,10090.ENSMUSP00000026663,10090.ENSMUSP00000031862,10090.ENSMUSP00000032182,10090.ENSMUSP00000032335,10090.ENSMUSP00000033136,10090.ENSMUSP00000033880…	Arhgef18,Sh2b2,Cdk9,Ankrd17,Nfic,Dok2,Mtdh,Bcl6,Gsk3b,Dock8,Cbx8,Cbx3,Xpc,Atf7ip,Bag3,Eif4ebp1,Rrad,Git1,Irf2bpl,Cldn5,Oxsr1,Thoc2,Ptpn13,Basp1,Ppapdc3,Golph3,Bod1l,Chd4,Irf2bp1,Lmod1,Syncrip,Gfap,Map1b,Xrcc6,Serpinc1,Bcl9l,Htt,Fkbp15,Pml,Chd8,Trio,Map1a,Tsc2,Foxs1,Mtor,Phactr4,Trim44,Rps6,Ehmt1,Camk2d,Wdhd1,Rif1,Atrx,Ssh3,Kalrn,Cfl1,Cbx5,Fam129a,Hipk2,Cic,Rangap1,Peg10,Clasp2,Trps1,Myo18a,Hectd1
GO:0050896	Response to stimulus	87	6908	0.19	0.00096	3.01773	10090.ENSMUSP00000004622,10090.ENSMUSP00000004684,10090.ENSMUSP00000005188,10090.ENSMUSP00000009699,10090.ENSMUSP00000013773,10090.ENSMUSP00000014421,10090.ENSMUSP00000019076,10090.ENSMUSP00000022698,10090.ENSMUSP00000022865,10090.ENSMUSP00000023151,10090.ENSMUSP00000023507,10090.ENSMUSP00000024786,10090.ENSMUSP00000025831,10090.ENSMUSP00000026663,10090.ENSMUSP00000028509,10090.ENSMUSP00000029402…	Gab2,Arhgef18,Sh2b2,Cdk9,Cad,Ankrd17,Map2k3,Dok2,Mtdh,Bcl6,Gsk3b,Tfeb,Dock8,Cbx8,Gorasp2,Slc33a1,Vcam1,Abca1,Dock7,Rragc,Cbx3,Xpc,Bag3,Eif4ebp1,Rrad,Git1,Emsy,Pkn2,Cldn5,Oxsr1,Myof,Mtss1l,Golph3,Bod1l,Nucks1,Syncrip,Gfap,Iqgap2,Rab31,Map1b,Xrcc6,Serpinc1,Ppp1r12a,Bcl9l,Plec,Htt,Dennd4c,Pml,Glul,Chd8,Trio,Fyb,Dennd1b,Spin1,Tsc2,Slc7a2,Cds2,Mtor,Phactr4,Rps6,Ehmt1,Camk2d,Lrba,Trim25,Tnks1bp1,Wdhd1,…
GO:0030010	Establishment of cell polarity	9	129	0.93	0.001	3	10090.ENSMUSP00000023507,10090.ENSMUSP00000030286,10090.ENSMUSP00000057375,10090.ENSMUSP00000068374,10090.ENSMUSP00000078945,10090.ENSMUSP00000082965,10090.ENSMUSP00000094986,10090.ENSMUSP00000112259,10090.ENSMUSP00000130696	Gsk3b,Dock7,Golph3,Map1b,Htt,Sipa1l3,Tsc2,Cfl1,Myo18a
GO:0043547	Positive regulation of gtpase activity	14	355	0.68	0.0011	2.95861	10090.ENSMUSP00000023507,10090.ENSMUSP00000025127,10090.ENSMUSP00000025831,10090.ENSMUSP00000029092,10090.ENSMUSP00000030286,10090.ENSMUSP00000037210,10090.ENSMUSP00000042151,10090.ENSMUSP00000050211,10090.ENSMUSP00000082965,10090.ENSMUSP00000092082,10090.ENSMUSP00000094986,10090.ENSMUSP00000110611,10090.ENSMUSP00000126849,10090.ENSMUSP00000133898	Gsk3b,Mapre2,Dock8,Arfgap1,Dock7,Git1,Rundc1,Mtss1l,Sipa1l3,Dennd1b,Tsc2,Kalrn,Rangap1,Arhgap32
GO:0032879	Regulation of localization	46	2806	0.3	0.0014	2.85387	10090.ENSMUSP00000004622,10090.ENSMUSP00000005188,10090.ENSMUSP00000019076,10090.ENSMUSP00000023151,10090.ENSMUSP00000023507,10090.ENSMUSP00000025127,10090.ENSMUSP00000025831,10090.ENSMUSP00000029092,10090.ENSMUSP00000029358,10090.ENSMUSP00000030010,10090.ENSMUSP00000030286,10090.ENSMUSP00000033136,10090.ENSMUSP00000034351,10090.ENSMUSP00000036065,10090.ENSMUSP00000037210,10090.ENSMUSP00000037970…	Gab2,Sh2b2,Map2k3,Bcl6,Gsk3b,Mapre2,Dock8,Arfgap1,Nmd3,Abca1,Dock7,Bag3,Rrad,Reep2,Git1,Bmp2k,Pkn2,Cldn5,Oxsr1,Thoc2,Pard6b,Golph3,Gfap,Rab31,Map1b,Ppp1r12a,Htt,Pml,Glul,Map1a,Iqsec2,Tsc2,Ehd2,Mtor,Camk2d,Synpo2,Kalrn,Cfl1,Lcp1,Sik3,Sorbs2,Zfp609,Rangap1,Clasp2,Myo18a,Hectd1
GO:0010556	Regulation of macromolecule biosynthetic process	51	3294	0.28	0.0017	2.76955	10090.ENSMUSP00000009699,10090.ENSMUSP00000009713,10090.ENSMUSP00000014421,10090.ENSMUSP00000019076,10090.ENSMUSP00000020461,10090.ENSMUSP00000022865,10090.ENSMUSP00000023151,10090.ENSMUSP00000023507,10090.ENSMUSP00000024786,10090.ENSMUSP00000026663,10090.ENSMUSP00000029358,10090.ENSMUSP00000031862,10090.ENSMUSP00000032182,10090.ENSMUSP00000032335,10090.ENSMUSP00000033136,10090.ENSMUSP00000033880…	Cdk9,Mkl2,Ankrd17,Map2k3,Nfic,Mtdh,Bcl6,Gsk3b,Tfeb,Cbx8,Nmd3,Cbx3,Xpc,Atf7ip,Bag3,Eif4ebp1,Emsy,Irf2bpl,Srrt,Med13,Basp1,Chd4,Irf2bp1,Nucks1,Syncrip,Nup98,Xrcc6,Ppp1r12a,Bcl9l,Pml,Chd8,Trappc9,Spin1,Tsc2,Foxs1,Mtor,Trim44,Ehmt1,Camk2d,Trim25,Kmt2b,Wdhd1,Rif1,Atrx,Cbx5,Fam129a,Zfp609,Hipk2,Cic,Trps1,Tcof1
GO:0046907	Intracellular transport	26	1166	0.44	0.0019	2.72125	10090.ENSMUSP00000023507,10090.ENSMUSP00000029358,10090.ENSMUSP00000029414,10090.ENSMUSP00000030010,10090.ENSMUSP00000030286,10090.ENSMUSP00000036065,10090.ENSMUSP00000038983,10090.ENSMUSP00000039243,10090.ENSMUSP00000042151,10090.ENSMUSP00000044677,10090.ENSMUSP00000047562,10090.ENSMUSP00000068195,10090.ENSMUSP00000068374,10090.ENSMUSP00000068530,10090.ENSMUSP00000071078,10090.ENSMUSP00000078945…	Gsk3b,Nmd3,Ssr3,Abca1,Dock7,Reep2,Fam21,Snx2,Rundc1,Thoc2,Trappc11,Rab31,Map1b,Nup98,Cope,Htt,Pml,Dennd1b,Map1a,Tsc2,Ehd2,Eps15,Lrba,Kif1a,Cfl1,Akap13
GO:0035556	Intracellular signal transduction	29	1402	0.4	0.0021	2.67778	10090.ENSMUSP00000004622,10090.ENSMUSP00000004684,10090.ENSMUSP00000005188,10090.ENSMUSP00000019076,10090.ENSMUSP00000022698,10090.ENSMUSP00000023151,10090.ENSMUSP00000023507,10090.ENSMUSP00000025831,10090.ENSMUSP00000029574,10090.ENSMUSP00000030010,10090.ENSMUSP00000030286,10090.ENSMUSP00000033880,10090.ENSMUSP00000039566,10090.ENSMUSP00000042155,10090.ENSMUSP00000068195,10090.ENSMUSP00000082816…	Gab2,Arhgef18,Sh2b2,Map2k3,Dok2,Bcl6,Gsk3b,Dock8,Vcam1,Abca1,Dock7,Eif4ebp1,Pkn2,Oxsr1,Rab31,Pml,Tsc2,Mtor,Phactr4,Rps6,Atrx,Kalrn,Adcy9,Lcp1,Akap13,Sik3,Pitpnm2,Hipk2,Arhgap32
GO:2001141	Regulation of rna biosynthetic process	45	2775	0.3	0.0022	2.65758	10090.ENSMUSP00000009699,10090.ENSMUSP00000009713,10090.ENSMUSP00000019076,10090.ENSMUSP00000020461,10090.ENSMUSP00000022865,10090.ENSMUSP00000023151,10090.ENSMUSP00000023507,10090.ENSMUSP00000024786,10090.ENSMUSP00000026663,10090.ENSMUSP00000029358,10090.ENSMUSP00000031862,10090.ENSMUSP00000032182,10090.ENSMUSP00000032335,10090.ENSMUSP00000033136,10090.ENSMUSP00000038216,10090.ENSMUSP00000041070…	Cdk9,Mkl2,Map2k3,Nfic,Mtdh,Bcl6,Gsk3b,Tfeb,Cbx8,Nmd3,Cbx3,Xpc,Atf7ip,Bag3,Emsy,Irf2bpl,Srrt,Med13,Basp1,Chd4,Irf2bp1,Nucks1,Nup98,Xrcc6,Ppp1r12a,Bcl9l,Pml,Chd8,Trappc9,Spin1,Tsc2,Foxs1,Mtor,Trim44,Ehmt1,Trim25,Kmt2b,Wdhd1,Rif1,Atrx,Cbx5,Zfp609,Hipk2,Cic,Trps1
GO:0042886	Amide transport	27	1264	0.42	0.0025	2.60206	10090.ENSMUSP00000023507,10090.ENSMUSP00000029092,10090.ENSMUSP00000029358,10090.ENSMUSP00000029402,10090.ENSMUSP00000029414,10090.ENSMUSP00000030010,10090.ENSMUSP00000036065,10090.ENSMUSP00000038983,10090.ENSMUSP00000039243,10090.ENSMUSP00000042151,10090.ENSMUSP00000044677,10090.ENSMUSP00000057375,10090.ENSMUSP00000068195,10090.ENSMUSP00000068530,10090.ENSMUSP00000071078,10090.ENSMUSP00000072643…	Gsk3b,Arfgap1,Nmd3,Slc33a1,Ssr3,Abca1,Reep2,Fam21,Snx2,Rundc1,Thoc2,Golph3,Rab31,Nup98,Cope,Ubap1,Htt,Dennd4c,Golga4,Pml,Dennd1b,Map1a,Tsc2,Eps15,Steap3,Kif1a,Cfl1
GO:0048856	Anatomical structure development	70	5258	0.21	0.0025	2.60206	10090.ENSMUSP00000004622,10090.ENSMUSP00000005188,10090.ENSMUSP00000009713,10090.ENSMUSP00000013773,10090.ENSMUSP00000014421,10090.ENSMUSP00000020461,10090.ENSMUSP00000022327,10090.ENSMUSP00000023151,10090.ENSMUSP00000023507,10090.ENSMUSP00000024786,10090.ENSMUSP00000029574,10090.ENSMUSP00000030286,10090.ENSMUSP00000031103,10090.ENSMUSP00000033136,10090.ENSMUSP00000033880,10090.ENSMUSP00000036025…	Gab2,Sh2b2,Mkl2,Cad,Ankrd17,Nfic,Ldb3,Bcl6,Gsk3b,Tfeb,Vcam1,Dock7,Ugdh,Bag3,Eif4ebp1,Pgm5,Git1,Snx2,Irf2bpl,Cldn5,Rundc1,Srrt,Thoc2,Myof,Wdfy3,Basp1,Lmod1,Gfap,Map1b,Xrcc6,Serpinc1,Bcl9l,Pvrl2,Htt,Golga4,Pml,Sipa1l3,Glul,Chd8,Trappc9,Trio,Myh11,Map1a,Spin1,Tsc2,Foxs1,Mtor,Phactr4,Rps6,Camk2d,Cgn,Kmt2b,Kif1a,Atrx,Kalrn,Cfl1,Adcy9,Lcp1,Akap13,Sik3,Sorbs2,Zfp609,Hipk2,Chd2,Cic,Peg10,Clasp2,Trps1,Tco…
GO:0051128	Regulation of cellular component organization	41	2438	0.31	0.0026	2.58503	10090.ENSMUSP00000004684,10090.ENSMUSP00000009699,10090.ENSMUSP00000023151,10090.ENSMUSP00000023507,10090.ENSMUSP00000025127,10090.ENSMUSP00000029092,10090.ENSMUSP00000030010,10090.ENSMUSP00000032335,10090.ENSMUSP00000033136,10090.ENSMUSP00000033880,10090.ENSMUSP00000034351,10090.ENSMUSP00000037970,10090.ENSMUSP00000041925,10090.ENSMUSP00000044677,10090.ENSMUSP00000057375,10090.ENSMUSP00000061597…	Arhgef18,Cdk9,Bcl6,Gsk3b,Mapre2,Arfgap1,Abca1,Atf7ip,Bag3,Eif4ebp1,Rrad,Bmp2k,Cldn5,Thoc2,Golph3,Lmod1,Gfap,Iqgap2,Rab31,Map1b,Htt,Golga4,Pml,Sept9,Map1a,Tsc2,Ehd2,Mtor,Synpo2,Kmt2b,Wdhd1,Rif1,Kif1a,Atrx,Ssh3,Kalrn,Cfl1,Lcp1,Akap13,Sorbs2,Clasp2
GO:0015031	Protein transport	26	1204	0.42	0.0029	2.5376	10090.ENSMUSP00000023507,10090.ENSMUSP00000029092,10090.ENSMUSP00000029358,10090.ENSMUSP00000029414,10090.ENSMUSP00000030010,10090.ENSMUSP00000036065,10090.ENSMUSP00000038983,10090.ENSMUSP00000039243,10090.ENSMUSP00000042151,10090.ENSMUSP00000044677,10090.ENSMUSP00000057375,10090.ENSMUSP00000068195,10090.ENSMUSP00000068530,10090.ENSMUSP00000071078,10090.ENSMUSP00000072643,10090.ENSMUSP00000078945…	Gsk3b,Arfgap1,Nmd3,Ssr3,Abca1,Reep2,Fam21,Snx2,Rundc1,Thoc2,Golph3,Rab31,Nup98,Cope,Ubap1,Htt,Dennd4c,Golga4,Pml,Dennd1b,Map1a,Tsc2,Eps15,Steap3,Kif1a,Cfl1
GO:0045184	Establishment of protein localization	27	1288	0.41	0.0031	2.50864	10090.ENSMUSP00000023507,10090.ENSMUSP00000028509,10090.ENSMUSP00000029092,10090.ENSMUSP00000029358,10090.ENSMUSP00000029414,10090.ENSMUSP00000030010,10090.ENSMUSP00000036065,10090.ENSMUSP00000038983,10090.ENSMUSP00000039243,10090.ENSMUSP00000042151,10090.ENSMUSP00000044677,10090.ENSMUSP00000057375,10090.ENSMUSP00000068195,10090.ENSMUSP00000068530,10090.ENSMUSP00000071078,10090.ENSMUSP00000072643…	Gsk3b,Gorasp2,Arfgap1,Nmd3,Ssr3,Abca1,Reep2,Fam21,Snx2,Rundc1,Thoc2,Golph3,Rab31,Nup98,Cope,Ubap1,Htt,Dennd4c,Golga4,Pml,Dennd1b,Map1a,Tsc2,Eps15,Steap3,Kif1a,Cfl1
GO:0032502	Developmental process	73	5629	0.2	0.0032	2.49485	10090.ENSMUSP00000004622,10090.ENSMUSP00000005188,10090.ENSMUSP00000009713,10090.ENSMUSP00000013773,10090.ENSMUSP00000014421,10090.ENSMUSP00000020461,10090.ENSMUSP00000022327,10090.ENSMUSP00000023151,10090.ENSMUSP00000023507,10090.ENSMUSP00000024786,10090.ENSMUSP00000028509,10090.ENSMUSP00000029574,10090.ENSMUSP00000030286,10090.ENSMUSP00000031103,10090.ENSMUSP00000033136,10090.ENSMUSP00000033880…	Gab2,Sh2b2,Mkl2,Cad,Ankrd17,Nfic,Ldb3,Bcl6,Gsk3b,Tfeb,Gorasp2,Vcam1,Dock7,Ugdh,Bag3,Eif4ebp1,Pgm5,Git1,Snx2,Irf2bpl,Cldn5,Rundc1,Srrt,Thoc2,Myof,Wdfy3,Basp1,Lmod1,Gfap,Map1b,Xrcc6,Serpinc1,Bcl9l,Pvrl2,Htt,Golga4,Pml,Sipa1l3,Glul,Chd8,Trappc9,Trio,Myh11,Map1a,Spin1,Tsc2,Foxs1,Nhsl2,Mtor,Phactr4,Rps6,Camk2d,Cgn,Kmt2b,Rif1,Kif1a,Atrx,Kalrn,Cfl1,Adcy9,Lcp1,Akap13,Sik3,Sorbs2,Zfp609,Hipk2,Chd2,Cic,Peg…
GO:2000112	Regulation of cellular macromolecule biosynthetic process	49	3203	0.27	0.0032	2.49485	10090.ENSMUSP00000009699,10090.ENSMUSP00000009713,10090.ENSMUSP00000014421,10090.ENSMUSP00000019076,10090.ENSMUSP00000020461,10090.ENSMUSP00000022865,10090.ENSMUSP00000023151,10090.ENSMUSP00000023507,10090.ENSMUSP00000024786,10090.ENSMUSP00000026663,10090.ENSMUSP00000031862,10090.ENSMUSP00000032182,10090.ENSMUSP00000032335,10090.ENSMUSP00000033136,10090.ENSMUSP00000033880,10090.ENSMUSP00000038216…	Cdk9,Mkl2,Ankrd17,Map2k3,Nfic,Mtdh,Bcl6,Gsk3b,Tfeb,Cbx8,Cbx3,Xpc,Atf7ip,Bag3,Eif4ebp1,Emsy,Irf2bpl,Srrt,Med13,Basp1,Chd4,Irf2bp1,Nucks1,Syncrip,Xrcc6,Ppp1r12a,Bcl9l,Pml,Chd8,Trappc9,Spin1,Tsc2,Foxs1,Mtor,Trim44,Ehmt1,Camk2d,Trim25,Kmt2b,Wdhd1,Rif1,Atrx,Cbx5,Fam129a,Zfp609,Hipk2,Cic,Trps1,Tcof1
GO:0035176	Social behavior	6	55	1.13	0.0038	2.42022	10090.ENSMUSP00000078945,10090.ENSMUSP00000087184,10090.ENSMUSP00000094986,10090.ENSMUSP00000099510,10090.ENSMUSP00000110611,10090.ENSMUSP00000126659	Htt,Chd8,Tsc2,Mtor,Kalrn,Cic
GO:0044093	Positive regulation of molecular function	32	1711	0.36	0.0038	2.42022	10090.ENSMUSP00000009699,10090.ENSMUSP00000019076,10090.ENSMUSP00000022865,10090.ENSMUSP00000023507,10090.ENSMUSP00000025127,10090.ENSMUSP00000025831,10090.ENSMUSP00000029092,10090.ENSMUSP00000029358,10090.ENSMUSP00000030286,10090.ENSMUSP00000037210,10090.ENSMUSP00000041925,10090.ENSMUSP00000042151,10090.ENSMUSP00000042155,10090.ENSMUSP00000050211,10090.ENSMUSP00000066561,10090.ENSMUSP00000068559…	Cdk9,Map2k3,Mtdh,Gsk3b,Mapre2,Dock8,Arfgap1,Nmd3,Dock7,Git1,Cldn5,Rundc1,Oxsr1,Mtss1l,Ppm1h,Xrcc6,Ppp1r12a,Htt,Pml,Sipa1l3,Trappc9,Dennd1b,Tsc2,Phactr4,Trim25,Kalrn,Cfl1,Akap13,Hipk2,Rangap1,Arhgap32,Ncf2
GO:0051234	Establishment of localization	52	3522	0.26	0.0038	2.42022	10090.ENSMUSP00000013773,10090.ENSMUSP00000023507,10090.ENSMUSP00000028509,10090.ENSMUSP00000029092,10090.ENSMUSP00000029358,10090.ENSMUSP00000029402,10090.ENSMUSP00000029414,10090.ENSMUSP00000030010,10090.ENSMUSP00000030286,10090.ENSMUSP00000036065,10090.ENSMUSP00000038757,10090.ENSMUSP00000038983,10090.ENSMUSP00000039243,10090.ENSMUSP00000042151,10090.ENSMUSP00000042959,10090.ENSMUSP00000044677…	Cad,Gsk3b,Gorasp2,Arfgap1,Nmd3,Slc33a1,Ssr3,Abca1,Dock7,Reep2,Esyt3,Fam21,Snx2,Rundc1,Fcho2,Thoc2,Trappc11,Marcksl1,Golph3,Eea1,Rab31,Map1b,Nup98,Serpinc1,Cope,Ubap1,Pvrl2,Mical3,Htt,Dennd4c,Fkbp15,Golga4,Pml,Dennd1b,Map1a,Tsc2,Ehd2,Slc7a2,Trpm7,Eps15,Camk2d,Lrba,Steap3,Kif1a,Kalrn,Cfl1,Akap13,Pitpnm2,Clasp2,Slc3a2,Myo18a,Ncf2
GO:1903506	Regulation of nucleic acid-templated transcription	44	2771	0.29	0.0038	2.42022	10090.ENSMUSP00000009699,10090.ENSMUSP00000009713,10090.ENSMUSP00000019076,10090.ENSMUSP00000020461,10090.ENSMUSP00000022865,10090.ENSMUSP00000023151,10090.ENSMUSP00000023507,10090.ENSMUSP00000024786,10090.ENSMUSP00000026663,10090.ENSMUSP00000031862,10090.ENSMUSP00000032182,10090.ENSMUSP00000032335,10090.ENSMUSP00000033136,10090.ENSMUSP00000038216,10090.ENSMUSP00000041070,10090.ENSMUSP00000043123…	Cdk9,Mkl2,Map2k3,Nfic,Mtdh,Bcl6,Gsk3b,Tfeb,Cbx8,Cbx3,Xpc,Atf7ip,Bag3,Emsy,Irf2bpl,Srrt,Med13,Basp1,Chd4,Irf2bp1,Nucks1,Nup98,Xrcc6,Ppp1r12a,Bcl9l,Pml,Chd8,Trappc9,Spin1,Tsc2,Foxs1,Mtor,Trim44,Ehmt1,Trim25,Kmt2b,Wdhd1,Rif1,Atrx,Cbx5,Zfp609,Hipk2,Cic,Trps1
GO:0048869	Cellular developmental process	54	3731	0.25	0.0039	2.40894	10090.ENSMUSP00000004622,10090.ENSMUSP00000005188,10090.ENSMUSP00000009713,10090.ENSMUSP00000022327,10090.ENSMUSP00000023151,10090.ENSMUSP00000023507,10090.ENSMUSP00000028509,10090.ENSMUSP00000029574,10090.ENSMUSP00000030286,10090.ENSMUSP00000036025,10090.ENSMUSP00000037210,10090.ENSMUSP00000039243,10090.ENSMUSP00000041925,10090.ENSMUSP00000043123,10090.ENSMUSP00000044677,10090.ENSMUSP00000045036…	Gab2,Sh2b2,Mkl2,Ldb3,Bcl6,Gsk3b,Gorasp2,Vcam1,Dock7,Pgm5,Git1,Snx2,Cldn5,Srrt,Thoc2,Myof,Basp1,Lmod1,Gfap,Map1b,Xrcc6,Bcl9l,Pvrl2,Htt,Golga4,Pml,Sipa1l3,Trappc9,Trio,Myh11,Map1a,Tsc2,Foxs1,Nhsl2,Mtor,Phactr4,Rps6,Camk2d,Cgn,Kmt2b,Kif1a,Atrx,Kalrn,Cfl1,Akap13,Sorbs2,Zfp609,Hipk2,Chd2,Peg10,Clasp2,Trps1,Tcof1,Hectd1
GO:0031326	Regulation of cellular biosynthetic process	51	3448	0.26	0.0041	2.38722	10090.ENSMUSP00000009699,10090.ENSMUSP00000009713,10090.ENSMUSP00000014421,10090.ENSMUSP00000019076,10090.ENSMUSP00000020461,10090.ENSMUSP00000022865,10090.ENSMUSP00000023151,10090.ENSMUSP00000023507,10090.ENSMUSP00000024786,10090.ENSMUSP00000026663,10090.ENSMUSP00000029358,10090.ENSMUSP00000031862,10090.ENSMUSP00000032182,10090.ENSMUSP00000032335,10090.ENSMUSP00000033136,10090.ENSMUSP00000033880…	Cdk9,Mkl2,Ankrd17,Map2k3,Nfic,Mtdh,Bcl6,Gsk3b,Tfeb,Cbx8,Nmd3,Cbx3,Xpc,Atf7ip,Bag3,Eif4ebp1,Emsy,Irf2bpl,Srrt,Med13,Basp1,Chd4,Irf2bp1,Nucks1,Syncrip,Nup98,Xrcc6,Ppp1r12a,Bcl9l,Pml,Chd8,Trappc9,Spin1,Tsc2,Foxs1,Mtor,Trim44,Ehmt1,Camk2d,Trim25,Kmt2b,Wdhd1,Rif1,Atrx,Cbx5,Fam129a,Zfp609,Hipk2,Cic,Trps1,Tcof1
GO:0010256	Endomembrane system organization	13	365	0.64	0.0044	2.35655	10090.ENSMUSP00000028509,10090.ENSMUSP00000030010,10090.ENSMUSP00000036065,10090.ENSMUSP00000038757,10090.ENSMUSP00000045036,10090.ENSMUSP00000047562,10090.ENSMUSP00000050211,10090.ENSMUSP00000057375,10090.ENSMUSP00000074898,10090.ENSMUSP00000078945,10090.ENSMUSP00000096397,10090.ENSMUSP00000128460,10090.ENSMUSP00000130696	Gorasp2,Abca1,Reep2,Esyt3,Myof,Trappc11,Mtss1l,Golph3,Pvrl2,Htt,Ehd2,Clasp2,Myo18a
GO:0006355	Regulation of transcription, dna-templated	43	2720	0.29	0.0047	2.3279	10090.ENSMUSP00000009699,10090.ENSMUSP00000009713,10090.ENSMUSP00000019076,10090.ENSMUSP00000020461,10090.ENSMUSP00000022865,10090.ENSMUSP00000023151,10090.ENSMUSP00000023507,10090.ENSMUSP00000024786,10090.ENSMUSP00000026663,10090.ENSMUSP00000031862,10090.ENSMUSP00000032182,10090.ENSMUSP00000032335,10090.ENSMUSP00000033136,10090.ENSMUSP00000038216,10090.ENSMUSP00000041070,10090.ENSMUSP00000043123…	Cdk9,Mkl2,Map2k3,Nfic,Mtdh,Bcl6,Gsk3b,Tfeb,Cbx8,Cbx3,Xpc,Atf7ip,Bag3,Emsy,Irf2bpl,Srrt,Med13,Basp1,Chd4,Irf2bp1,Nucks1,Xrcc6,Ppp1r12a,Bcl9l,Pml,Chd8,Trappc9,Spin1,Tsc2,Foxs1,Mtor,Trim44,Ehmt1,Trim25,Kmt2b,Wdhd1,Rif1,Atrx,Cbx5,Zfp609,Hipk2,Cic,Trps1
GO:0006810	Transport	50	3382	0.26	0.0047	2.3279	10090.ENSMUSP00000013773,10090.ENSMUSP00000023507,10090.ENSMUSP00000029092,10090.ENSMUSP00000029358,10090.ENSMUSP00000029402,10090.ENSMUSP00000029414,10090.ENSMUSP00000030010,10090.ENSMUSP00000030286,10090.ENSMUSP00000036065,10090.ENSMUSP00000038757,10090.ENSMUSP00000038983,10090.ENSMUSP00000039243,10090.ENSMUSP00000042151,10090.ENSMUSP00000042959,10090.ENSMUSP00000044677,10090.ENSMUSP00000047562…	Cad,Gsk3b,Arfgap1,Nmd3,Slc33a1,Ssr3,Abca1,Dock7,Reep2,Esyt3,Fam21,Snx2,Rundc1,Fcho2,Thoc2,Trappc11,Marcksl1,Golph3,Eea1,Rab31,Map1b,Nup98,Serpinc1,Cope,Ubap1,Mical3,Htt,Dennd4c,Fkbp15,Golga4,Pml,Dennd1b,Map1a,Tsc2,Ehd2,Slc7a2,Trpm7,Eps15,Camk2d,Lrba,Steap3,Kif1a,Kalrn,Cfl1,Akap13,Pitpnm2,Clasp2,Slc3a2,Myo18a,Ncf2
GO:0030154	Cell differentiation	53	3674	0.25	0.0047	2.3279	10090.ENSMUSP00000004622,10090.ENSMUSP00000005188,10090.ENSMUSP00000009713,10090.ENSMUSP00000022327,10090.ENSMUSP00000023151,10090.ENSMUSP00000023507,10090.ENSMUSP00000028509,10090.ENSMUSP00000029574,10090.ENSMUSP00000030286,10090.ENSMUSP00000036025,10090.ENSMUSP00000037210,10090.ENSMUSP00000041925,10090.ENSMUSP00000043123,10090.ENSMUSP00000044677,10090.ENSMUSP00000045036,10090.ENSMUSP00000053943…	Gab2,Sh2b2,Mkl2,Ldb3,Bcl6,Gsk3b,Gorasp2,Vcam1,Dock7,Pgm5,Git1,Cldn5,Srrt,Thoc2,Myof,Basp1,Lmod1,Gfap,Map1b,Xrcc6,Bcl9l,Pvrl2,Htt,Golga4,Pml,Sipa1l3,Trappc9,Trio,Myh11,Map1a,Tsc2,Foxs1,Nhsl2,Mtor,Phactr4,Rps6,Camk2d,Cgn,Kmt2b,Kif1a,Atrx,Kalrn,Cfl1,Akap13,Sorbs2,Zfp609,Hipk2,Chd2,Peg10,Clasp2,Trps1,Tcof1,Hectd1
GO:0033043	Regulation of organelle organization	26	1258	0.4	0.0047	2.3279	10090.ENSMUSP00000004684,10090.ENSMUSP00000009699,10090.ENSMUSP00000023151,10090.ENSMUSP00000023507,10090.ENSMUSP00000025127,10090.ENSMUSP00000032335,10090.ENSMUSP00000033136,10090.ENSMUSP00000057375,10090.ENSMUSP00000061597,10090.ENSMUSP00000067685,10090.ENSMUSP00000068374,10090.ENSMUSP00000078945,10090.ENSMUSP00000082816,10090.ENSMUSP00000091435,10090.ENSMUSP00000092223,10090.ENSMUSP00000099510…	Arhgef18,Cdk9,Bcl6,Gsk3b,Mapre2,Atf7ip,Bag3,Golph3,Lmod1,Iqgap2,Map1b,Htt,Pml,Sept9,Map1a,Mtor,Synpo2,Kmt2b,Wdhd1,Rif1,Atrx,Ssh3,Cfl1,Lcp1,Akap13,Clasp2
GO:0043170	Macromolecule metabolic process	69	5313	0.2	0.0047	2.3279	10090.ENSMUSP00000009699,10090.ENSMUSP00000009713,10090.ENSMUSP00000013773,10090.ENSMUSP00000019076,10090.ENSMUSP00000020461,10090.ENSMUSP00000021381,10090.ENSMUSP00000023507,10090.ENSMUSP00000026663,10090.ENSMUSP00000030010,10090.ENSMUSP00000031103,10090.ENSMUSP00000032182,10090.ENSMUSP00000032335,10090.ENSMUSP00000033136,10090.ENSMUSP00000033880,10090.ENSMUSP00000037970,10090.ENSMUSP00000038216…	Cdk9,Mkl2,Cad,Map2k3,Nfic,Pnn,Gsk3b,Cbx8,Abca1,Ugdh,Xpc,Atf7ip,Bag3,Eif4ebp1,Bmp2k,Emsy,Pkn2,Irf2bpl,Oxsr1,Gtf3c4,Srrt,Med13,Thoc2,Ptpn13,Golph3,Fbxo10,Bod1l,Irf2bp1,Nucks1,Syncrip,Cwc22,Ppm1h,Rab31,Nup98,Xrcc6,Ppp1r12a,Ubap1,8030462N17Rik,Fkbp15,Pml,Glul,Htatsf1,Trio,Dennd1b,Spin1,Znhit6,Mtor,Trpm7,Trim44,Eps15,Rps6,Ehmt1,Camk2d,Synpo2,Trim25,Kmt2b,Tnks1bp1,Wdhd1,Rif1,Atrx,Ssh3,Kalrn,Cfl1,Akap13…
GO:0051336	Regulation of hydrolase activity	25	1184	0.41	0.0047	2.3279	10090.ENSMUSP00000020208,10090.ENSMUSP00000023151,10090.ENSMUSP00000023507,10090.ENSMUSP00000025127,10090.ENSMUSP00000025831,10090.ENSMUSP00000029092,10090.ENSMUSP00000030286,10090.ENSMUSP00000037210,10090.ENSMUSP00000042151,10090.ENSMUSP00000050211,10090.ENSMUSP00000058618,10090.ENSMUSP00000067685,10090.ENSMUSP00000068971,10090.ENSMUSP00000069257,10090.ENSMUSP00000078945,10090.ENSMUSP00000081575…	Fgd6,Bcl6,Gsk3b,Mapre2,Dock8,Arfgap1,Dock7,Git1,Rundc1,Mtss1l,Bod1l,Iqgap2,Serpinc1,Ppp1r12a,Htt,Fkbp15,Pml,Sipa1l3,Dennd1b,Tsc2,Mtor,Phactr4,Kalrn,Rangap1,Arhgap32
GO:0061049	Cell growth involved in cardiac muscle cell development	4	15	1.51	0.0047	2.3279	10090.ENSMUSP00000023507,10090.ENSMUSP00000102009,10090.ENSMUSP00000117686,10090.ENSMUSP00000121619	Gsk3b,Camk2d,Akap13,Sorbs2
GO:0072657	Protein localization to membrane	14	427	0.6	0.0047	2.3279	10090.ENSMUSP00000028509,10090.ENSMUSP00000029414,10090.ENSMUSP00000036065,10090.ENSMUSP00000037210,10090.ENSMUSP00000042959,10090.ENSMUSP00000057375,10090.ENSMUSP00000068195,10090.ENSMUSP00000080685,10090.ENSMUSP00000081880,10090.ENSMUSP00000087947,10090.ENSMUSP00000094986,10090.ENSMUSP00000096397,10090.ENSMUSP00000110611,10090.ENSMUSP00000128460	Gorasp2,Ssr3,Reep2,Git1,Fcho2,Golph3,Rab31,Dennd4c,Golga4,Fyb,Tsc2,Ehd2,Kalrn,Clasp2
GO:0051252	Regulation of rna metabolic process	46	3027	0.27	0.0053	2.27572	10090.ENSMUSP00000009699,10090.ENSMUSP00000009713,10090.ENSMUSP00000019076,10090.ENSMUSP00000020461,10090.ENSMUSP00000022865,10090.ENSMUSP00000023151,10090.ENSMUSP00000023507,10090.ENSMUSP00000024786,10090.ENSMUSP00000026663,10090.ENSMUSP00000029358,10090.ENSMUSP00000031862,10090.ENSMUSP00000032182,10090.ENSMUSP00000032335,10090.ENSMUSP00000033136,10090.ENSMUSP00000038216,10090.ENSMUSP00000041070…	Cdk9,Mkl2,Map2k3,Nfic,Mtdh,Bcl6,Gsk3b,Tfeb,Cbx8,Nmd3,Cbx3,Xpc,Atf7ip,Bag3,Emsy,Irf2bpl,Srrt,Med13,Basp1,Chd4,Irf2bp1,Nucks1,Syncrip,Nup98,Xrcc6,Ppp1r12a,Bcl9l,Pml,Chd8,Trappc9,Spin1,Tsc2,Foxs1,Mtor,Trim44,Ehmt1,Trim25,Kmt2b,Wdhd1,Rif1,Atrx,Cbx5,Zfp609,Hipk2,Cic,Trps1
GO:0042692	Muscle cell differentiation	11	276	0.69	0.0061	2.21467	10090.ENSMUSP00000009713,10090.ENSMUSP00000022327,10090.ENSMUSP00000023507,10090.ENSMUSP00000036025,10090.ENSMUSP00000045036,10090.ENSMUSP00000061597,10090.ENSMUSP00000087756,10090.ENSMUSP00000099510,10090.ENSMUSP00000102009,10090.ENSMUSP00000117686,10090.ENSMUSP00000121619	Mkl2,Ldb3,Gsk3b,Pgm5,Myof,Lmod1,Myh11,Mtor,Camk2d,Akap13,Sorbs2
GO:0051172	Negative regulation of nitrogen compound metabolic process	38	2310	0.3	0.0061	2.21467	10090.ENSMUSP00000009699,10090.ENSMUSP00000020461,10090.ENSMUSP00000022698,10090.ENSMUSP00000022865,10090.ENSMUSP00000023151,10090.ENSMUSP00000023507,10090.ENSMUSP00000026663,10090.ENSMUSP00000031862,10090.ENSMUSP00000032335,10090.ENSMUSP00000033136,10090.ENSMUSP00000033880,10090.ENSMUSP00000041070,10090.ENSMUSP00000048119,10090.ENSMUSP00000053943,10090.ENSMUSP00000058618,10090.ENSMUSP00000060054…	Cdk9,Nfic,Dok2,Mtdh,Bcl6,Gsk3b,Cbx8,Cbx3,Atf7ip,Bag3,Eif4ebp1,Irf2bpl,Ptpn13,Basp1,Bod1l,Chd4,Irf2bp1,Syncrip,Xrcc6,Serpinc1,Htt,Pml,Chd8,Map1a,Tsc2,Foxs1,Mtor,Phactr4,Trim44,Ehmt1,Wdhd1,Rif1,Atrx,Cbx5,Fam129a,Hipk2,Cic,Trps1
GO:0071705	Nitrogen compound transport	29	1534	0.36	0.0061	2.21467	10090.ENSMUSP00000023507,10090.ENSMUSP00000029092,10090.ENSMUSP00000029358,10090.ENSMUSP00000029402,10090.ENSMUSP00000029414,10090.ENSMUSP00000030010,10090.ENSMUSP00000036065,10090.ENSMUSP00000038983,10090.ENSMUSP00000039243,10090.ENSMUSP00000042151,10090.ENSMUSP00000044677,10090.ENSMUSP00000057375,10090.ENSMUSP00000068195,10090.ENSMUSP00000068530,10090.ENSMUSP00000071078,10090.ENSMUSP00000072643…	Gsk3b,Arfgap1,Nmd3,Slc33a1,Ssr3,Abca1,Reep2,Fam21,Snx2,Rundc1,Thoc2,Golph3,Rab31,Nup98,Cope,Ubap1,Htt,Dennd4c,Golga4,Pml,Dennd1b,Map1a,Tsc2,Slc7a2,Eps15,Steap3,Kif1a,Cfl1,Slc3a2
GO:0048731	System development	59	4350	0.22	0.0067	2.17393	10090.ENSMUSP00000004622,10090.ENSMUSP00000005188,10090.ENSMUSP00000009713,10090.ENSMUSP00000013773,10090.ENSMUSP00000014421,10090.ENSMUSP00000020461,10090.ENSMUSP00000022327,10090.ENSMUSP00000023151,10090.ENSMUSP00000023507,10090.ENSMUSP00000024786,10090.ENSMUSP00000029574,10090.ENSMUSP00000030286,10090.ENSMUSP00000033136,10090.ENSMUSP00000033880,10090.ENSMUSP00000037210,10090.ENSMUSP00000041070…	Gab2,Sh2b2,Mkl2,Cad,Ankrd17,Nfic,Ldb3,Bcl6,Gsk3b,Tfeb,Vcam1,Dock7,Bag3,Eif4ebp1,Git1,Irf2bpl,Cldn5,Srrt,Thoc2,Basp1,Gfap,Map1b,Xrcc6,Serpinc1,Bcl9l,Htt,Golga4,Pml,Sipa1l3,Glul,Chd8,Trappc9,Trio,Myh11,Map1a,Tsc2,Foxs1,Mtor,Phactr4,Rps6,Camk2d,Kmt2b,Kif1a,Atrx,Kalrn,Cfl1,Lcp1,Akap13,Sik3,Sorbs2,Zfp609,Hipk2,Chd2,Cic,Peg10,Clasp2,Trps1,Tcof1,Hectd1
GO:1903827	Regulation of cellular protein localization	16	576	0.53	0.0067	2.17393	10090.ENSMUSP00000023507,10090.ENSMUSP00000029358,10090.ENSMUSP00000033136,10090.ENSMUSP00000044677,10090.ENSMUSP00000078945,10090.ENSMUSP00000082816,10090.ENSMUSP00000083375,10090.ENSMUSP00000092223,10090.ENSMUSP00000093995,10090.ENSMUSP00000102009,10090.ENSMUSP00000110611,10090.ENSMUSP00000112259,10090.ENSMUSP00000116271,10090.ENSMUSP00000121619,10090.ENSMUSP00000126849,10090.ENSMUSP00000136449	Gsk3b,Nmd3,Bag3,Thoc2,Htt,Pml,Glul,Map1a,Iqsec2,Camk2d,Kalrn,Cfl1,Lcp1,Sorbs2,Rangap1,Hectd1
GO:0051253	Negative regulation of rna metabolic process	26	1308	0.39	0.0068	2.16749	10090.ENSMUSP00000009699,10090.ENSMUSP00000020461,10090.ENSMUSP00000022865,10090.ENSMUSP00000023151,10090.ENSMUSP00000026663,10090.ENSMUSP00000031862,10090.ENSMUSP00000032335,10090.ENSMUSP00000033136,10090.ENSMUSP00000041070,10090.ENSMUSP00000053943,10090.ENSMUSP00000060054,10090.ENSMUSP00000061234,10090.ENSMUSP00000063744,10090.ENSMUSP00000068559,10090.ENSMUSP00000082816,10090.ENSMUSP00000087184…	Cdk9,Nfic,Mtdh,Bcl6,Cbx8,Cbx3,Atf7ip,Bag3,Irf2bpl,Basp1,Chd4,Irf2bp1,Syncrip,Xrcc6,Pml,Chd8,Foxs1,Mtor,Ehmt1,Wdhd1,Rif1,Atrx,Cbx5,Hipk2,Cic,Trps1
GO:0055013	Cardiac muscle cell development	6	68	1.03	0.0072	2.14267	10090.ENSMUSP00000023507,10090.ENSMUSP00000087756,10090.ENSMUSP00000099510,10090.ENSMUSP00000102009,10090.ENSMUSP00000117686,10090.ENSMUSP00000121619	Gsk3b,Myh11,Mtor,Camk2d,Akap13,Sorbs2
GO:0032012	Regulation of arf protein signal transduction	4	19	1.41	0.0075	2.12494	10090.ENSMUSP00000025127,10090.ENSMUSP00000029092,10090.ENSMUSP00000037210,10090.ENSMUSP00000093995	Mapre2,Arfgap1,Git1,Iqsec2
GO:0048468	Cell development	31	1730	0.34	0.0075	2.12494	10090.ENSMUSP00000009713,10090.ENSMUSP00000022327,10090.ENSMUSP00000023151,10090.ENSMUSP00000023507,10090.ENSMUSP00000030286,10090.ENSMUSP00000036025,10090.ENSMUSP00000037210,10090.ENSMUSP00000041925,10090.ENSMUSP00000044677,10090.ENSMUSP00000045036,10090.ENSMUSP00000061597,10090.ENSMUSP00000064691,10090.ENSMUSP00000068374,10090.ENSMUSP00000074898,10090.ENSMUSP00000078945,10090.ENSMUSP00000082965…	Mkl2,Ldb3,Bcl6,Gsk3b,Dock7,Pgm5,Git1,Cldn5,Thoc2,Myof,Lmod1,Gfap,Map1b,Pvrl2,Htt,Sipa1l3,Trio,Myh11,Map1a,Mtor,Phactr4,Rps6,Camk2d,Cgn,Kmt2b,Atrx,Kalrn,Cfl1,Akap13,Sorbs2,Tcof1
GO:0060341	Regulation of cellular localization	23	1083	0.42	0.0075	2.12494	10090.ENSMUSP00000004622,10090.ENSMUSP00000023507,10090.ENSMUSP00000029358,10090.ENSMUSP00000033136,10090.ENSMUSP00000036065,10090.ENSMUSP00000037210,10090.ENSMUSP00000044677,10090.ENSMUSP00000052619,10090.ENSMUSP00000068374,10090.ENSMUSP00000069257,10090.ENSMUSP00000078945,10090.ENSMUSP00000082816,10090.ENSMUSP00000083375,10090.ENSMUSP00000092223,10090.ENSMUSP00000093995,10090.ENSMUSP00000096397…	Gab2,Gsk3b,Nmd3,Bag3,Reep2,Git1,Thoc2,Pard6b,Map1b,Ppp1r12a,Htt,Pml,Glul,Map1a,Iqsec2,Ehd2,Camk2d,Kalrn,Cfl1,Lcp1,Sorbs2,Rangap1,Hectd1
GO:0071310	Cellular response to organic substance	34	1987	0.32	0.0075	2.12494	10090.ENSMUSP00000005188,10090.ENSMUSP00000009699,10090.ENSMUSP00000013773,10090.ENSMUSP00000019076,10090.ENSMUSP00000022865,10090.ENSMUSP00000023507,10090.ENSMUSP00000025831,10090.ENSMUSP00000029402,10090.ENSMUSP00000029574,10090.ENSMUSP00000030010,10090.ENSMUSP00000030399,10090.ENSMUSP00000033136,10090.ENSMUSP00000033880,10090.ENSMUSP00000037210,10090.ENSMUSP00000041925,10090.ENSMUSP00000042155…	Sh2b2,Cdk9,Cad,Map2k3,Mtdh,Gsk3b,Dock8,Slc33a1,Vcam1,Abca1,Rragc,Bag3,Eif4ebp1,Git1,Cldn5,Oxsr1,Mtss1l,Golph3,Syncrip,Rab31,Map1b,Htt,Dennd4c,Pml,Tsc2,Mtor,Lrba,Trim25,Rif1,Cfl1,Hipk2,Rangap1,Myo18a,Ncf2
GO:0007275	Multicellular organism development	64	4921	0.2	0.0088	2.05552	10090.ENSMUSP00000004622,10090.ENSMUSP00000005188,10090.ENSMUSP00000009713,10090.ENSMUSP00000013773,10090.ENSMUSP00000014421,10090.ENSMUSP00000020461,10090.ENSMUSP00000022327,10090.ENSMUSP00000023151,10090.ENSMUSP00000023507,10090.ENSMUSP00000024786,10090.ENSMUSP00000029574,10090.ENSMUSP00000030286,10090.ENSMUSP00000031103,10090.ENSMUSP00000033136,10090.ENSMUSP00000033880,10090.ENSMUSP00000037210…	Gab2,Sh2b2,Mkl2,Cad,Ankrd17,Nfic,Ldb3,Bcl6,Gsk3b,Tfeb,Vcam1,Dock7,Ugdh,Bag3,Eif4ebp1,Git1,Irf2bpl,Cldn5,Rundc1,Srrt,Thoc2,Wdfy3,Basp1,Gfap,Map1b,Xrcc6,Serpinc1,Bcl9l,Htt,Golga4,Pml,Sipa1l3,Glul,Chd8,Trappc9,Trio,Myh11,Map1a,Spin1,Tsc2,Foxs1,Mtor,Phactr4,Rps6,Camk2d,Kmt2b,Kif1a,Atrx,Kalrn,Cfl1,Adcy9,Lcp1,Akap13,Sik3,Sorbs2,Zfp609,Hipk2,Chd2,Cic,Peg10,Clasp2,Trps1,Tcof1,Hectd1
GO:0008152	Metabolic process	86	7331	0.16	0.0089	2.05061	10090.ENSMUSP00000009699,10090.ENSMUSP00000009713,10090.ENSMUSP00000013773,10090.ENSMUSP00000019076,10090.ENSMUSP00000020461,10090.ENSMUSP00000021381,10090.ENSMUSP00000023507,10090.ENSMUSP00000024786,10090.ENSMUSP00000025656,10090.ENSMUSP00000026663,10090.ENSMUSP00000029574,10090.ENSMUSP00000030010,10090.ENSMUSP00000031103,10090.ENSMUSP00000032182,10090.ENSMUSP00000032335,10090.ENSMUSP00000032762…	Cdk9,Mkl2,Cad,Map2k3,Nfic,Pnn,Gsk3b,Tfeb,Aldh1a7,Cbx8,Vcam1,Abca1,Ugdh,Xpc,Atf7ip,Plin1,Bag3,Eif4ebp1,Pgm5,Bmp2k,Emsy,Pkn2,Irf2bpl,Oxsr1,Gtf3c4,Srrt,Med13,Thoc2,Myof,Ptpn13,Wdfy3,Ppapdc3,Golph3,Fbxo10,Bod1l,Irf2bp1,Nucks1,Syncrip,Cwc22,Ppm1h,Rab31,Nup98,Xrcc6,Ppp1r12a,Ubap1,8030462N17Rik,Mical3,Htt,Fkbp15,Pml,Tecpr1,Glul,Htatsf1,Trio,Dennd1b,Spin1,Znhit6,Slc7a2,Cds2,Mtor,Trpm7,Trim44,Eps15,Rps6,E…
GO:0010605	Negative regulation of macromolecule metabolic process	41	2646	0.28	0.0089	2.05061	10090.ENSMUSP00000009699,10090.ENSMUSP00000020461,10090.ENSMUSP00000022698,10090.ENSMUSP00000022865,10090.ENSMUSP00000023151,10090.ENSMUSP00000023507,10090.ENSMUSP00000026663,10090.ENSMUSP00000031862,10090.ENSMUSP00000032335,10090.ENSMUSP00000033136,10090.ENSMUSP00000033880,10090.ENSMUSP00000041070,10090.ENSMUSP00000041925,10090.ENSMUSP00000043123,10090.ENSMUSP00000048119,10090.ENSMUSP00000053943…	Cdk9,Nfic,Dok2,Mtdh,Bcl6,Gsk3b,Cbx8,Cbx3,Atf7ip,Bag3,Eif4ebp1,Irf2bpl,Cldn5,Srrt,Ptpn13,Basp1,Bod1l,Chd4,Irf2bp1,Syncrip,Xrcc6,Serpinc1,Htt,Pml,Chd8,Map1a,Tsc2,Foxs1,Mtor,Phactr4,Trim44,Ehmt1,Kmt2b,Wdhd1,Rif1,Atrx,Cbx5,Fam129a,Hipk2,Cic,Trps1
GO:0031032	Actomyosin structure organization	7	108	0.9	0.0091	2.04096	10090.ENSMUSP00000022327,10090.ENSMUSP00000036025,10090.ENSMUSP00000061597,10090.ENSMUSP00000087756,10090.ENSMUSP00000099425,10090.ENSMUSP00000099513,10090.ENSMUSP00000130696	Ldb3,Pgm5,Lmod1,Myh11,Epb4.1l1,Trpm7,Myo18a
GO:0072659	Protein localization to plasma membrane	9	194	0.75	0.0091	2.04096	10090.ENSMUSP00000028509,10090.ENSMUSP00000042959,10090.ENSMUSP00000057375,10090.ENSMUSP00000068195,10090.ENSMUSP00000080685,10090.ENSMUSP00000081880,10090.ENSMUSP00000087947,10090.ENSMUSP00000096397,10090.ENSMUSP00000128460	Gorasp2,Fcho2,Golph3,Rab31,Dennd4c,Golga4,Fyb,Ehd2,Clasp2
GO:0044085	Cellular component biogenesis	36	2201	0.3	0.0095	2.02228	10090.ENSMUSP00000022327,10090.ENSMUSP00000022865,10090.ENSMUSP00000025127,10090.ENSMUSP00000028509,10090.ENSMUSP00000029358,10090.ENSMUSP00000030010,10090.ENSMUSP00000031103,10090.ENSMUSP00000033136,10090.ENSMUSP00000036025,10090.ENSMUSP00000039566,10090.ENSMUSP00000041925,10090.ENSMUSP00000042959,10090.ENSMUSP00000050211,10090.ENSMUSP00000052619,10090.ENSMUSP00000057375,10090.ENSMUSP00000061597…	Ldb3,Mtdh,Mapre2,Gorasp2,Nmd3,Abca1,Ugdh,Bag3,Pgm5,Pkn2,Cldn5,Fcho2,Mtss1l,Pard6b,Golph3,Lmod1,Ubap2l,Map1b,Nup98,Pvrl2,Plec,Pml,Glul,Myh11,Znhit6,Ehd2,Cds2,Trpm7,Eps15,Rps6,Synpo2,Cgn,Steap3,Atrx,Lcp1,Clasp2
GO:0031323	Regulation of cellular metabolic process	69	5479	0.19	0.0097	2.01323	10090.ENSMUSP00000009699,10090.ENSMUSP00000009713,10090.ENSMUSP00000014421,10090.ENSMUSP00000019076,10090.ENSMUSP00000020461,10090.ENSMUSP00000022698,10090.ENSMUSP00000022865,10090.ENSMUSP00000023151,10090.ENSMUSP00000023507,10090.ENSMUSP00000024786,10090.ENSMUSP00000026663,10090.ENSMUSP00000029358,10090.ENSMUSP00000030286,10090.ENSMUSP00000030399,10090.ENSMUSP00000031862,10090.ENSMUSP00000032182…	Cdk9,Mkl2,Ankrd17,Map2k3,Nfic,Dok2,Mtdh,Bcl6,Gsk3b,Tfeb,Cbx8,Nmd3,Dock7,Rragc,Cbx3,Xpc,Atf7ip,Bag3,Eif4ebp1,Git1,Emsy,Irf2bpl,Oxsr1,Srrt,Med13,Ptpn13,Basp1,Bod1l,Chd4,Irf2bp1,Nucks1,Syncrip,Gfap,Nup98,Xrcc6,Serpinc1,Ppp1r12a,Bcl9l,Htt,Fkbp15,Pml,Chd8,Trappc9,Map1a,Spin1,Tsc2,Foxs1,Mtor,Phactr4,Trim44,Eps15,Ehmt1,Camk2d,Synpo2,Trim25,Kmt2b,Tnks1bp1,Wdhd1,Rif1,Atrx,Cfl1,Cbx5,Fam129a,Akap13,Zfp609,H…
GO:0006950	Response to stress	45	3045	0.26	0.01	2	10090.ENSMUSP00000009699,10090.ENSMUSP00000013773,10090.ENSMUSP00000014421,10090.ENSMUSP00000019076,10090.ENSMUSP00000023151,10090.ENSMUSP00000023507,10090.ENSMUSP00000024786,10090.ENSMUSP00000026663,10090.ENSMUSP00000028509,10090.ENSMUSP00000030010,10090.ENSMUSP00000030399,10090.ENSMUSP00000031862,10090.ENSMUSP00000032182,10090.ENSMUSP00000033136,10090.ENSMUSP00000033880,10090.ENSMUSP00000038216…	Cdk9,Cad,Ankrd17,Map2k3,Bcl6,Gsk3b,Tfeb,Cbx8,Gorasp2,Abca1,Rragc,Cbx3,Xpc,Bag3,Eif4ebp1,Emsy,Oxsr1,Myof,Bod1l,Nucks1,Syncrip,Gfap,Map1b,Xrcc6,Serpinc1,Plec,Pml,Glul,Tsc2,Slc7a2,Mtor,Camk2d,Trim25,Tnks1bp1,Wdhd1,Rif1,Atrx,Cfl1,Cbx5,Fam129a,Lcp1,Hipk2,Chd2,Rangap1,Myo18a
GO:0010638	Positive regulation of organelle organization	16	606	0.51	0.01	2	10090.ENSMUSP00000009699,10090.ENSMUSP00000023151,10090.ENSMUSP00000023507,10090.ENSMUSP00000032335,10090.ENSMUSP00000061597,10090.ENSMUSP00000067685,10090.ENSMUSP00000068374,10090.ENSMUSP00000078945,10090.ENSMUSP00000082816,10090.ENSMUSP00000091435,10090.ENSMUSP00000099510,10090.ENSMUSP00000102034,10090.ENSMUSP00000108313,10090.ENSMUSP00000109203,10090.ENSMUSP00000112259,10090.ENSMUSP00000116271	Cdk9,Bcl6,Gsk3b,Atf7ip,Lmod1,Iqgap2,Map1b,Htt,Pml,Sept9,Mtor,Synpo2,Rif1,Atrx,Cfl1,Lcp1
GO:0051649	Establishment of localization in cell	28	1518	0.35	0.01	2	10090.ENSMUSP00000023507,10090.ENSMUSP00000029358,10090.ENSMUSP00000029414,10090.ENSMUSP00000030010,10090.ENSMUSP00000030286,10090.ENSMUSP00000036065,10090.ENSMUSP00000038983,10090.ENSMUSP00000039243,10090.ENSMUSP00000042151,10090.ENSMUSP00000042959,10090.ENSMUSP00000044677,10090.ENSMUSP00000047562,10090.ENSMUSP00000068195,10090.ENSMUSP00000068374,10090.ENSMUSP00000068530,10090.ENSMUSP00000071078…	Gsk3b,Nmd3,Ssr3,Abca1,Dock7,Reep2,Fam21,Snx2,Rundc1,Fcho2,Thoc2,Trappc11,Rab31,Map1b,Nup98,Cope,Htt,Pml,Dennd1b,Map1a,Tsc2,Ehd2,Eps15,Lrba,Kif1a,Cfl1,Akap13,Clasp2
GO:0031324	Negative regulation of cellular metabolic process	39	2497	0.28	0.011	1.95861	10090.ENSMUSP00000009699,10090.ENSMUSP00000020461,10090.ENSMUSP00000022698,10090.ENSMUSP00000022865,10090.ENSMUSP00000023151,10090.ENSMUSP00000023507,10090.ENSMUSP00000026663,10090.ENSMUSP00000031862,10090.ENSMUSP00000032335,10090.ENSMUSP00000033136,10090.ENSMUSP00000033880,10090.ENSMUSP00000041070,10090.ENSMUSP00000048119,10090.ENSMUSP00000053943,10090.ENSMUSP00000058618,10090.ENSMUSP00000060054…	Cdk9,Nfic,Dok2,Mtdh,Bcl6,Gsk3b,Cbx8,Cbx3,Atf7ip,Bag3,Eif4ebp1,Irf2bpl,Ptpn13,Basp1,Bod1l,Chd4,Irf2bp1,Syncrip,Xrcc6,Serpinc1,Htt,Fkbp15,Pml,Chd8,Map1a,Tsc2,Foxs1,Mtor,Phactr4,Trim44,Ehmt1,Wdhd1,Rif1,Atrx,Cbx5,Fam129a,Hipk2,Cic,Trps1
GO:0032501	Multicellular organismal process	76	6272	0.17	0.011	1.95861	10090.ENSMUSP00000004622,10090.ENSMUSP00000005188,10090.ENSMUSP00000009713,10090.ENSMUSP00000013773,10090.ENSMUSP00000014421,10090.ENSMUSP00000019076,10090.ENSMUSP00000020461,10090.ENSMUSP00000022327,10090.ENSMUSP00000023151,10090.ENSMUSP00000023507,10090.ENSMUSP00000024786,10090.ENSMUSP00000028509,10090.ENSMUSP00000029574,10090.ENSMUSP00000030010,10090.ENSMUSP00000030286,10090.ENSMUSP00000031103…	Gab2,Sh2b2,Mkl2,Cad,Ankrd17,Map2k3,Nfic,Ldb3,Bcl6,Gsk3b,Tfeb,Gorasp2,Vcam1,Abca1,Dock7,Ugdh,Bag3,Eif4ebp1,Reep2,Git1,Pkn2,Irf2bpl,Cldn5,Rundc1,Srrt,Thoc2,Wdfy3,Basp1,Lmod1,Gfap,Map1b,Xrcc6,Serpinc1,Bcl9l,Pvrl2,Htt,Golga4,Pml,Sipa1l3,Glul,Chd8,Trappc9,Trio,Myh11,Dennd1b,Map1a,Spin1,Tsc2,Slc7a2,Foxs1,Mtor,Trpm7,Phactr4,Rps6,Camk2d,Kmt2b,Rif1,Kif1a,Atrx,Kalrn,Cfl1,Adcy9,Lcp1,Akap13,Sik3,Sorbs2,Zfp60…
GO:0048583	Regulation of response to stimulus	51	3651	0.23	0.011	1.95861	10090.ENSMUSP00000004622,10090.ENSMUSP00000004684,10090.ENSMUSP00000005188,10090.ENSMUSP00000009699,10090.ENSMUSP00000014421,10090.ENSMUSP00000019076,10090.ENSMUSP00000022698,10090.ENSMUSP00000022865,10090.ENSMUSP00000023151,10090.ENSMUSP00000023507,10090.ENSMUSP00000025127,10090.ENSMUSP00000026663,10090.ENSMUSP00000029092,10090.ENSMUSP00000030010,10090.ENSMUSP00000030399,10090.ENSMUSP00000037210…	Gab2,Arhgef18,Sh2b2,Cdk9,Ankrd17,Map2k3,Dok2,Mtdh,Bcl6,Gsk3b,Mapre2,Cbx8,Arfgap1,Abca1,Rragc,Git1,Bmp2k,Oxsr1,Myof,Ptpn13,Golph3,Nucks1,Xrcc6,Serpinc1,Bcl9l,Pvrl2,Htt,Pml,Sipa1l3,Chd8,Fyb,Dennd1b,Spin1,Iqsec2,Tsc2,Slc7a2,Mtor,Phactr4,Trim44,Camk2d,Trim25,Steap3,Rif1,Kalrn,Cfl1,Akap13,Sik3,Hipk2,Peg10,Clasp2,Trps1
GO:1901699	Cellular response to nitrogen compound	16	615	0.5	0.011	1.95861	10090.ENSMUSP00000005188,10090.ENSMUSP00000023507,10090.ENSMUSP00000029574,10090.ENSMUSP00000030399,10090.ENSMUSP00000033880,10090.ENSMUSP00000057375,10090.ENSMUSP00000068195,10090.ENSMUSP00000068374,10090.ENSMUSP00000078945,10090.ENSMUSP00000080685,10090.ENSMUSP00000094986,10090.ENSMUSP00000099510,10090.ENSMUSP00000109203,10090.ENSMUSP00000112259,10090.ENSMUSP00000121619,10090.ENSMUSP00000126849	Sh2b2,Gsk3b,Vcam1,Rragc,Eif4ebp1,Golph3,Rab31,Map1b,Htt,Dennd4c,Tsc2,Mtor,Atrx,Cfl1,Sorbs2,Rangap1
GO:0016192	Vesicle-mediated transport	23	1130	0.4	0.0113	1.94692	10090.ENSMUSP00000029092,10090.ENSMUSP00000030010,10090.ENSMUSP00000038983,10090.ENSMUSP00000039243,10090.ENSMUSP00000042959,10090.ENSMUSP00000047562,10090.ENSMUSP00000057375,10090.ENSMUSP00000061493,10090.ENSMUSP00000068195,10090.ENSMUSP00000071078,10090.ENSMUSP00000076402,10090.ENSMUSP00000078945,10090.ENSMUSP00000081575,10090.ENSMUSP00000081880,10090.ENSMUSP00000092082,10090.ENSMUSP00000096397…	Arfgap1,Abca1,Fam21,Snx2,Fcho2,Trappc11,Golph3,Eea1,Rab31,Cope,Mical3,Htt,Fkbp15,Golga4,Dennd1b,Ehd2,Eps15,Lrba,Steap3,Kif1a,Clasp2,Myo18a,Ncf2
GO:0018107	Peptidyl-threonine phosphorylation	6	78	0.97	0.0113	1.94692	10090.ENSMUSP00000013773,10090.ENSMUSP00000023507,10090.ENSMUSP00000042155,10090.ENSMUSP00000099510,10090.ENSMUSP00000102009,10090.ENSMUSP00000124133	Cad,Gsk3b,Oxsr1,Mtor,Camk2d,Hipk2
GO:0019219	Regulation of nucleobase-containing compound metabolic process	47	3265	0.25	0.0113	1.94692	10090.ENSMUSP00000009699,10090.ENSMUSP00000009713,10090.ENSMUSP00000019076,10090.ENSMUSP00000020461,10090.ENSMUSP00000022865,10090.ENSMUSP00000023151,10090.ENSMUSP00000023507,10090.ENSMUSP00000024786,10090.ENSMUSP00000026663,10090.ENSMUSP00000029358,10090.ENSMUSP00000031862,10090.ENSMUSP00000032182,10090.ENSMUSP00000032335,10090.ENSMUSP00000033136,10090.ENSMUSP00000038216,10090.ENSMUSP00000041070…	Cdk9,Mkl2,Map2k3,Nfic,Mtdh,Bcl6,Gsk3b,Tfeb,Cbx8,Nmd3,Cbx3,Xpc,Atf7ip,Bag3,Emsy,Irf2bpl,Srrt,Med13,Basp1,Chd4,Irf2bp1,Nucks1,Syncrip,Nup98,Xrcc6,Ppp1r12a,Bcl9l,Pml,Chd8,Trappc9,Spin1,Tsc2,Foxs1,Mtor,Trim44,Ehmt1,Camk2d,Trim25,Kmt2b,Wdhd1,Rif1,Atrx,Cbx5,Zfp609,Hipk2,Cic,Trps1
GO:0044260	Cellular macromolecule metabolic process	56	4161	0.22	0.0113	1.94692	10090.ENSMUSP00000009699,10090.ENSMUSP00000013773,10090.ENSMUSP00000019076,10090.ENSMUSP00000020461,10090.ENSMUSP00000023507,10090.ENSMUSP00000026663,10090.ENSMUSP00000030010,10090.ENSMUSP00000031103,10090.ENSMUSP00000032182,10090.ENSMUSP00000032335,10090.ENSMUSP00000033880,10090.ENSMUSP00000037970,10090.ENSMUSP00000038216,10090.ENSMUSP00000039566,10090.ENSMUSP00000041070,10090.ENSMUSP00000042155…	Cdk9,Cad,Map2k3,Nfic,Gsk3b,Cbx8,Abca1,Ugdh,Xpc,Atf7ip,Eif4ebp1,Bmp2k,Emsy,Pkn2,Irf2bpl,Oxsr1,Gtf3c4,Med13,Ptpn13,Golph3,Fbxo10,Bod1l,Irf2bp1,Nucks1,Ppm1h,Rab31,Xrcc6,Ppp1r12a,Ubap1,8030462N17Rik,Fkbp15,Pml,Glul,Trio,Spin1,Mtor,Trpm7,Trim44,Eps15,Rps6,Ehmt1,Camk2d,Trim25,Kmt2b,Tnks1bp1,Wdhd1,Rif1,Atrx,Ssh3,Kalrn,Cfl1,Akap13,Sik3,Hipk2,Tcof1,Hectd1
GO:0009892	Negative regulation of metabolic process	43	2895	0.26	0.0122	1.91364	10090.ENSMUSP00000009699,10090.ENSMUSP00000020461,10090.ENSMUSP00000022698,10090.ENSMUSP00000022865,10090.ENSMUSP00000023151,10090.ENSMUSP00000023507,10090.ENSMUSP00000026663,10090.ENSMUSP00000030286,10090.ENSMUSP00000031862,10090.ENSMUSP00000032335,10090.ENSMUSP00000033136,10090.ENSMUSP00000033880,10090.ENSMUSP00000041070,10090.ENSMUSP00000041925,10090.ENSMUSP00000043123,10090.ENSMUSP00000048119…	Cdk9,Nfic,Dok2,Mtdh,Bcl6,Gsk3b,Cbx8,Dock7,Cbx3,Atf7ip,Bag3,Eif4ebp1,Irf2bpl,Cldn5,Srrt,Ptpn13,Basp1,Bod1l,Chd4,Irf2bp1,Syncrip,Xrcc6,Serpinc1,Htt,Fkbp15,Pml,Chd8,Map1a,Tsc2,Foxs1,Mtor,Phactr4,Trim44,Ehmt1,Kmt2b,Wdhd1,Rif1,Atrx,Cbx5,Fam129a,Hipk2,Cic,Trps1
GO:0061061	Muscle structure development	14	493	0.54	0.0124	1.90658	10090.ENSMUSP00000009713,10090.ENSMUSP00000022327,10090.ENSMUSP00000023507,10090.ENSMUSP00000036025,10090.ENSMUSP00000045036,10090.ENSMUSP00000061597,10090.ENSMUSP00000074516,10090.ENSMUSP00000087756,10090.ENSMUSP00000099510,10090.ENSMUSP00000102009,10090.ENSMUSP00000117686,10090.ENSMUSP00000121619,10090.ENSMUSP00000124089,10090.ENSMUSP00000126352	Mkl2,Ldb3,Gsk3b,Pgm5,Myof,Lmod1,Bcl9l,Myh11,Mtor,Camk2d,Akap13,Sorbs2,Zfp609,Chd2
GO:1902531	Regulation of intracellular signal transduction	28	1556	0.34	0.0134	1.8729	10090.ENSMUSP00000004684,10090.ENSMUSP00000005188,10090.ENSMUSP00000014421,10090.ENSMUSP00000019076,10090.ENSMUSP00000022698,10090.ENSMUSP00000022865,10090.ENSMUSP00000023151,10090.ENSMUSP00000023507,10090.ENSMUSP00000025127,10090.ENSMUSP00000029092,10090.ENSMUSP00000030010,10090.ENSMUSP00000030399,10090.ENSMUSP00000037210,10090.ENSMUSP00000048119,10090.ENSMUSP00000057375,10090.ENSMUSP00000078945…	Arhgef18,Sh2b2,Ankrd17,Map2k3,Dok2,Mtdh,Bcl6,Gsk3b,Mapre2,Arfgap1,Abca1,Rragc,Git1,Ptpn13,Golph3,Htt,Sipa1l3,Iqsec2,Tsc2,Mtor,Trim44,Camk2d,Trim25,Steap3,Kalrn,Akap13,Sik3,Hipk2
GO:0070887	Cellular response to chemical stimulus	39	2535	0.28	0.0135	1.86967	10090.ENSMUSP00000005188,10090.ENSMUSP00000009699,10090.ENSMUSP00000013773,10090.ENSMUSP00000019076,10090.ENSMUSP00000022865,10090.ENSMUSP00000023507,10090.ENSMUSP00000025831,10090.ENSMUSP00000026663,10090.ENSMUSP00000029402,10090.ENSMUSP00000029574,10090.ENSMUSP00000030010,10090.ENSMUSP00000030399,10090.ENSMUSP00000033136,10090.ENSMUSP00000033880,10090.ENSMUSP00000037210,10090.ENSMUSP00000041925…	Sh2b2,Cdk9,Cad,Map2k3,Mtdh,Gsk3b,Dock8,Cbx8,Slc33a1,Vcam1,Abca1,Rragc,Bag3,Eif4ebp1,Git1,Cldn5,Oxsr1,Mtss1l,Golph3,Syncrip,Rab31,Map1b,Xrcc6,Ppp1r12a,Htt,Dennd4c,Pml,Tsc2,Mtor,Lrba,Trim25,Rif1,Atrx,Cfl1,Sorbs2,Hipk2,Rangap1,Myo18a,Ncf2
GO:0071495	Cellular response to endogenous stimulus	22	1075	0.4	0.0141	1.85078	10090.ENSMUSP00000005188,10090.ENSMUSP00000013773,10090.ENSMUSP00000023507,10090.ENSMUSP00000029402,10090.ENSMUSP00000029574,10090.ENSMUSP00000030399,10090.ENSMUSP00000033880,10090.ENSMUSP00000037210,10090.ENSMUSP00000041925,10090.ENSMUSP00000050211,10090.ENSMUSP00000057375,10090.ENSMUSP00000068195,10090.ENSMUSP00000068374,10090.ENSMUSP00000078945,10090.ENSMUSP00000080685,10090.ENSMUSP00000082816…	Sh2b2,Cad,Gsk3b,Slc33a1,Vcam1,Rragc,Eif4ebp1,Git1,Cldn5,Mtss1l,Golph3,Rab31,Map1b,Htt,Dennd4c,Pml,Tsc2,Mtor,Cfl1,Hipk2,Rangap1,Ncf2
GO:0051130	Positive regulation of cellular component organization	24	1236	0.38	0.0145	1.83863	10090.ENSMUSP00000009699,10090.ENSMUSP00000023151,10090.ENSMUSP00000023507,10090.ENSMUSP00000030010,10090.ENSMUSP00000032335,10090.ENSMUSP00000041925,10090.ENSMUSP00000061597,10090.ENSMUSP00000067685,10090.ENSMUSP00000068195,10090.ENSMUSP00000068374,10090.ENSMUSP00000078945,10090.ENSMUSP00000081880,10090.ENSMUSP00000082816,10090.ENSMUSP00000091435,10090.ENSMUSP00000094986,10090.ENSMUSP00000096397…	Cdk9,Bcl6,Gsk3b,Abca1,Atf7ip,Cldn5,Lmod1,Iqgap2,Rab31,Map1b,Htt,Golga4,Pml,Sept9,Tsc2,Ehd2,Mtor,Synpo2,Rif1,Atrx,Kalrn,Cfl1,Lcp1,Clasp2
GO:0071702	Organic substance transport	31	1836	0.32	0.0162	1.79048	10090.ENSMUSP00000023507,10090.ENSMUSP00000029092,10090.ENSMUSP00000029358,10090.ENSMUSP00000029402,10090.ENSMUSP00000029414,10090.ENSMUSP00000030010,10090.ENSMUSP00000036065,10090.ENSMUSP00000038757,10090.ENSMUSP00000038983,10090.ENSMUSP00000039243,10090.ENSMUSP00000042151,10090.ENSMUSP00000044677,10090.ENSMUSP00000057375,10090.ENSMUSP00000068195,10090.ENSMUSP00000068530,10090.ENSMUSP00000071078…	Gsk3b,Arfgap1,Nmd3,Slc33a1,Ssr3,Abca1,Reep2,Esyt3,Fam21,Snx2,Rundc1,Thoc2,Golph3,Rab31,Nup98,Cope,Ubap1,Htt,Dennd4c,Golga4,Pml,Dennd1b,Map1a,Tsc2,Slc7a2,Eps15,Steap3,Kif1a,Cfl1,Pitpnm2,Slc3a2
GO:0050790	Regulation of catalytic activity	35	2202	0.29	0.0173	1.76195	10090.ENSMUSP00000019076,10090.ENSMUSP00000020208,10090.ENSMUSP00000023151,10090.ENSMUSP00000023507,10090.ENSMUSP00000025127,10090.ENSMUSP00000025831,10090.ENSMUSP00000026663,10090.ENSMUSP00000029092,10090.ENSMUSP00000030286,10090.ENSMUSP00000033136,10090.ENSMUSP00000037210,10090.ENSMUSP00000037970,10090.ENSMUSP00000042151,10090.ENSMUSP00000042155,10090.ENSMUSP00000050211,10090.ENSMUSP00000058618…	Map2k3,Fgd6,Bcl6,Gsk3b,Mapre2,Dock8,Cbx8,Arfgap1,Dock7,Bag3,Git1,Bmp2k,Rundc1,Oxsr1,Mtss1l,Bod1l,Ppm1h,Iqgap2,Xrcc6,Serpinc1,Ppp1r12a,Htt,Fkbp15,Pml,Sipa1l3,Dennd1b,Tsc2,Mtor,Phactr4,Synpo2,Kalrn,Akap13,Rangap1,Arhgap32,Ncf2
GO:0060255	Regulation of macromolecule metabolic process	69	5618	0.18	0.0176	1.75449	10090.ENSMUSP00000009699,10090.ENSMUSP00000009713,10090.ENSMUSP00000014421,10090.ENSMUSP00000019076,10090.ENSMUSP00000020461,10090.ENSMUSP00000022698,10090.ENSMUSP00000022865,10090.ENSMUSP00000023151,10090.ENSMUSP00000023507,10090.ENSMUSP00000024786,10090.ENSMUSP00000026663,10090.ENSMUSP00000029358,10090.ENSMUSP00000030286,10090.ENSMUSP00000031862,10090.ENSMUSP00000032182,10090.ENSMUSP00000032335…	Cdk9,Mkl2,Ankrd17,Map2k3,Nfic,Dok2,Mtdh,Bcl6,Gsk3b,Tfeb,Cbx8,Nmd3,Dock7,Cbx3,Xpc,Atf7ip,Bag3,Eif4ebp1,Git1,Emsy,Irf2bpl,Cldn5,Oxsr1,Srrt,Med13,Thoc2,Ptpn13,Basp1,Bod1l,Chd4,Irf2bp1,Nucks1,Syncrip,Gfap,Nup98,Xrcc6,Serpinc1,Ppp1r12a,Bcl9l,Htt,Pml,Chd8,Trappc9,Map1a,Spin1,Tsc2,Foxs1,Mtor,Phactr4,Trim44,Eps15,Ehmt1,Camk2d,Synpo2,Trim25,Kmt2b,Tnks1bp1,Wdhd1,Rif1,Atrx,Cfl1,Cbx5,Fam129a,Akap13,Zfp609,Hi…
GO:0050882	Voluntary musculoskeletal movement	3	9	1.61	0.0177	1.75203	10090.ENSMUSP00000092223,10090.ENSMUSP00000099510,10090.ENSMUSP00000124133	Map1a,Mtor,Hipk2
GO:0045892	Negative regulation of transcription, dna-templated	23	1181	0.38	0.0185	1.73283	10090.ENSMUSP00000020461,10090.ENSMUSP00000022865,10090.ENSMUSP00000023151,10090.ENSMUSP00000026663,10090.ENSMUSP00000031862,10090.ENSMUSP00000032335,10090.ENSMUSP00000033136,10090.ENSMUSP00000041070,10090.ENSMUSP00000053943,10090.ENSMUSP00000060054,10090.ENSMUSP00000061234,10090.ENSMUSP00000068559,10090.ENSMUSP00000082816,10090.ENSMUSP00000087184,10090.ENSMUSP00000096806,10090.ENSMUSP00000100002…	Nfic,Mtdh,Bcl6,Cbx8,Cbx3,Atf7ip,Bag3,Irf2bpl,Basp1,Chd4,Irf2bp1,Xrcc6,Pml,Chd8,Foxs1,Ehmt1,Wdhd1,Rif1,Atrx,Cbx5,Hipk2,Cic,Trps1
GO:0019222	Regulation of metabolic process	73	6085	0.17	0.0201	1.6968	10090.ENSMUSP00000005188,10090.ENSMUSP00000009699,10090.ENSMUSP00000009713,10090.ENSMUSP00000014421,10090.ENSMUSP00000019076,10090.ENSMUSP00000020461,10090.ENSMUSP00000022698,10090.ENSMUSP00000022865,10090.ENSMUSP00000023151,10090.ENSMUSP00000023507,10090.ENSMUSP00000024786,10090.ENSMUSP00000026663,10090.ENSMUSP00000029358,10090.ENSMUSP00000030286,10090.ENSMUSP00000030399,10090.ENSMUSP00000031862…	Sh2b2,Cdk9,Mkl2,Ankrd17,Map2k3,Nfic,Dok2,Mtdh,Bcl6,Gsk3b,Tfeb,Cbx8,Nmd3,Dock7,Rragc,Cbx3,Xpc,Atf7ip,Bag3,Eif4ebp1,Git1,Emsy,Irf2bpl,Cldn5,Oxsr1,Srrt,Med13,Thoc2,Ptpn13,Basp1,Bod1l,Chd4,Irf2bp1,Nucks1,Syncrip,Gfap,Ppm1h,Nup98,Xrcc6,Serpinc1,Ppp1r12a,Bcl9l,Htt,Fkbp15,Pml,Chd8,Trappc9,Map1a,Spin1,Tsc2,Foxs1,Mtor,Phactr4,Trim44,Eps15,Ehmt1,Camk2d,Synpo2,Trim25,Kmt2b,Tnks1bp1,Wdhd1,Rif1,Atrx,Cfl1,Cbx5…
GO:0051171	Regulation of nitrogen compound metabolic process	64	5126	0.18	0.0217	1.66354	10090.ENSMUSP00000009699,10090.ENSMUSP00000009713,10090.ENSMUSP00000019076,10090.ENSMUSP00000020461,10090.ENSMUSP00000022698,10090.ENSMUSP00000022865,10090.ENSMUSP00000023151,10090.ENSMUSP00000023507,10090.ENSMUSP00000024786,10090.ENSMUSP00000026663,10090.ENSMUSP00000029358,10090.ENSMUSP00000030286,10090.ENSMUSP00000031862,10090.ENSMUSP00000032182,10090.ENSMUSP00000032335,10090.ENSMUSP00000033136…	Cdk9,Mkl2,Map2k3,Nfic,Dok2,Mtdh,Bcl6,Gsk3b,Tfeb,Cbx8,Nmd3,Dock7,Cbx3,Xpc,Atf7ip,Bag3,Eif4ebp1,Emsy,Irf2bpl,Oxsr1,Srrt,Med13,Ptpn13,Basp1,Bod1l,Chd4,Irf2bp1,Nucks1,Syncrip,Gfap,Nup98,Xrcc6,Serpinc1,Ppp1r12a,Bcl9l,Htt,Pml,Chd8,Trappc9,Map1a,Spin1,Tsc2,Foxs1,Mtor,Phactr4,Trim44,Ehmt1,Camk2d,Synpo2,Trim25,Kmt2b,Tnks1bp1,Wdhd1,Rif1,Atrx,Cfl1,Cbx5,Fam129a,Akap13,Zfp609,Hipk2,Cic,Trps1,Tcof1
GO:0006974	Cellular response to dna damage stimulus	16	667	0.47	0.0225	1.64782	10090.ENSMUSP00000009699,10090.ENSMUSP00000023151,10090.ENSMUSP00000031862,10090.ENSMUSP00000032182,10090.ENSMUSP00000038216,10090.ENSMUSP00000058618,10090.ENSMUSP00000062576,10090.ENSMUSP00000068559,10090.ENSMUSP00000082816,10090.ENSMUSP00000107232,10090.ENSMUSP00000107421,10090.ENSMUSP00000108313,10090.ENSMUSP00000109203,10090.ENSMUSP00000113157,10090.ENSMUSP00000124133,10090.ENSMUSP00000126352	Cdk9,Bcl6,Cbx3,Xpc,Emsy,Bod1l,Nucks1,Xrcc6,Pml,Tnks1bp1,Wdhd1,Rif1,Atrx,Cbx5,Hipk2,Chd2
GO:0044237	Cellular metabolic process	76	6445	0.16	0.0228	1.64207	10090.ENSMUSP00000009699,10090.ENSMUSP00000013773,10090.ENSMUSP00000019076,10090.ENSMUSP00000020461,10090.ENSMUSP00000021381,10090.ENSMUSP00000023507,10090.ENSMUSP00000024786,10090.ENSMUSP00000026663,10090.ENSMUSP00000030010,10090.ENSMUSP00000031103,10090.ENSMUSP00000032182,10090.ENSMUSP00000032335,10090.ENSMUSP00000033136,10090.ENSMUSP00000033880,10090.ENSMUSP00000037970,10090.ENSMUSP00000038216…	Cdk9,Cad,Map2k3,Nfic,Pnn,Gsk3b,Tfeb,Cbx8,Abca1,Ugdh,Xpc,Atf7ip,Bag3,Eif4ebp1,Bmp2k,Emsy,Pkn2,Irf2bpl,Oxsr1,Gtf3c4,Srrt,Med13,Thoc2,Myof,Ptpn13,Wdfy3,Ppapdc3,Golph3,Fbxo10,Bod1l,Irf2bp1,Nucks1,Syncrip,Cwc22,Ppm1h,Rab31,Xrcc6,Ppp1r12a,Ubap1,8030462N17Rik,Htt,Fkbp15,Pml,Tecpr1,Glul,Htatsf1,Trio,Spin1,Znhit6,Slc7a2,Cds2,Mtor,Trpm7,Trim44,Eps15,Rps6,Ehmt1,Camk2d,Synpo2,Trim25,Kmt2b,Tnks1bp1,Wdhd1,Rif1…
GO:0009653	Anatomical structure morphogenesis	35	2244	0.28	0.023	1.63827	10090.ENSMUSP00000009713,10090.ENSMUSP00000020461,10090.ENSMUSP00000022327,10090.ENSMUSP00000023151,10090.ENSMUSP00000023507,10090.ENSMUSP00000029574,10090.ENSMUSP00000030286,10090.ENSMUSP00000031103,10090.ENSMUSP00000036025,10090.ENSMUSP00000039243,10090.ENSMUSP00000044677,10090.ENSMUSP00000045036,10090.ENSMUSP00000061597,10090.ENSMUSP00000068374,10090.ENSMUSP00000074898,10090.ENSMUSP00000078945…	Mkl2,Nfic,Ldb3,Bcl6,Gsk3b,Vcam1,Dock7,Ugdh,Pgm5,Snx2,Thoc2,Myof,Lmod1,Map1b,Pvrl2,Htt,Pml,Sipa1l3,Glul,Trio,Myh11,Map1a,Tsc2,Foxs1,Mtor,Phactr4,Rps6,Cgn,Atrx,Kalrn,Cfl1,Sik3,Hipk2,Tcof1,Hectd1
GO:0035051	Cardiocyte differentiation	7	134	0.81	0.0233	1.63264	10090.ENSMUSP00000023507,10090.ENSMUSP00000029574,10090.ENSMUSP00000087756,10090.ENSMUSP00000099510,10090.ENSMUSP00000102009,10090.ENSMUSP00000117686,10090.ENSMUSP00000121619	Gsk3b,Vcam1,Myh11,Mtor,Camk2d,Akap13,Sorbs2
GO:2000113	Negative regulation of cellular macromolecule biosynthetic process	25	1370	0.35	0.0234	1.63078	10090.ENSMUSP00000020461,10090.ENSMUSP00000022865,10090.ENSMUSP00000023151,10090.ENSMUSP00000026663,10090.ENSMUSP00000031862,10090.ENSMUSP00000032335,10090.ENSMUSP00000033136,10090.ENSMUSP00000033880,10090.ENSMUSP00000041070,10090.ENSMUSP00000053943,10090.ENSMUSP00000060054,10090.ENSMUSP00000061234,10090.ENSMUSP00000063744,10090.ENSMUSP00000068559,10090.ENSMUSP00000082816,10090.ENSMUSP00000087184…	Nfic,Mtdh,Bcl6,Cbx8,Cbx3,Atf7ip,Bag3,Eif4ebp1,Irf2bpl,Basp1,Chd4,Irf2bp1,Syncrip,Xrcc6,Pml,Chd8,Foxs1,Ehmt1,Wdhd1,Rif1,Atrx,Cbx5,Hipk2,Cic,Trps1
GO:0031297	Replication fork processing	4	30	1.21	0.0237	1.62525	10090.ENSMUSP00000009699,10090.ENSMUSP00000058618,10090.ENSMUSP00000062576,10090.ENSMUSP00000109203	Cdk9,Bod1l,Nucks1,Atrx
GO:0022607	Cellular component assembly	32	1983	0.3	0.0246	1.60906	10090.ENSMUSP00000022327,10090.ENSMUSP00000022865,10090.ENSMUSP00000025127,10090.ENSMUSP00000028509,10090.ENSMUSP00000030010,10090.ENSMUSP00000031103,10090.ENSMUSP00000033136,10090.ENSMUSP00000036025,10090.ENSMUSP00000039566,10090.ENSMUSP00000041925,10090.ENSMUSP00000042959,10090.ENSMUSP00000050211,10090.ENSMUSP00000052619,10090.ENSMUSP00000057375,10090.ENSMUSP00000061597,10090.ENSMUSP00000066138…	Ldb3,Mtdh,Mapre2,Gorasp2,Abca1,Ugdh,Bag3,Pgm5,Pkn2,Cldn5,Fcho2,Mtss1l,Pard6b,Golph3,Lmod1,Ubap2l,Map1b,Nup98,Pvrl2,Plec,Pml,Myh11,Znhit6,Ehd2,Cds2,Trpm7,Eps15,Synpo2,Cgn,Atrx,Lcp1,Clasp2
GO:0023051	Regulation of signaling	45	3227	0.23	0.0267	1.57349	10090.ENSMUSP00000004684,10090.ENSMUSP00000005188,10090.ENSMUSP00000014421,10090.ENSMUSP00000019076,10090.ENSMUSP00000022698,10090.ENSMUSP00000022865,10090.ENSMUSP00000023151,10090.ENSMUSP00000023507,10090.ENSMUSP00000025127,10090.ENSMUSP00000029092,10090.ENSMUSP00000030010,10090.ENSMUSP00000030399,10090.ENSMUSP00000037210,10090.ENSMUSP00000037970,10090.ENSMUSP00000045036,10090.ENSMUSP00000048119…	Arhgef18,Sh2b2,Ankrd17,Map2k3,Dok2,Mtdh,Bcl6,Gsk3b,Mapre2,Arfgap1,Abca1,Rragc,Git1,Bmp2k,Myof,Ptpn13,Golph3,Nucks1,Gfap,Map1b,Bcl9l,Pvrl2,Htt,Pml,Sipa1l3,Glul,Chd8,Map1a,Spin1,Iqsec2,Tsc2,Mtor,Phactr4,Trim44,Eps15,Camk2d,Trim25,Steap3,Kalrn,Cfl1,Akap13,Sik3,Hipk2,Peg10,Trps1
GO:0044089	Positive regulation of cellular component biogenesis	14	543	0.5	0.0267	1.57349	10090.ENSMUSP00000023507,10090.ENSMUSP00000030010,10090.ENSMUSP00000032335,10090.ENSMUSP00000041925,10090.ENSMUSP00000061597,10090.ENSMUSP00000067685,10090.ENSMUSP00000068374,10090.ENSMUSP00000078945,10090.ENSMUSP00000091435,10090.ENSMUSP00000099510,10090.ENSMUSP00000102034,10090.ENSMUSP00000112259,10090.ENSMUSP00000116271,10090.ENSMUSP00000128460	Gsk3b,Abca1,Atf7ip,Cldn5,Lmod1,Iqgap2,Map1b,Htt,Sept9,Mtor,Synpo2,Cfl1,Lcp1,Clasp2
GO:0051345	Positive regulation of hydrolase activity	16	682	0.46	0.0267	1.57349	10090.ENSMUSP00000023507,10090.ENSMUSP00000025127,10090.ENSMUSP00000025831,10090.ENSMUSP00000029092,10090.ENSMUSP00000030286,10090.ENSMUSP00000037210,10090.ENSMUSP00000042151,10090.ENSMUSP00000050211,10090.ENSMUSP00000069257,10090.ENSMUSP00000082816,10090.ENSMUSP00000082965,10090.ENSMUSP00000092082,10090.ENSMUSP00000094986,10090.ENSMUSP00000110611,10090.ENSMUSP00000126849,10090.ENSMUSP00000133898	Gsk3b,Mapre2,Dock8,Arfgap1,Dock7,Git1,Rundc1,Mtss1l,Ppp1r12a,Pml,Sipa1l3,Dennd1b,Tsc2,Kalrn,Rangap1,Arhgap32
GO:0065008	Regulation of biological quality	51	3822	0.21	0.0267	1.57349	10090.ENSMUSP00000004684,10090.ENSMUSP00000005188,10090.ENSMUSP00000013773,10090.ENSMUSP00000023151,10090.ENSMUSP00000023507,10090.ENSMUSP00000029574,10090.ENSMUSP00000030010,10090.ENSMUSP00000030286,10090.ENSMUSP00000032335,10090.ENSMUSP00000033136,10090.ENSMUSP00000037210,10090.ENSMUSP00000041925,10090.ENSMUSP00000044268,10090.ENSMUSP00000047562,10090.ENSMUSP00000055637,10090.ENSMUSP00000057375…	Arhgef18,Sh2b2,Cad,Bcl6,Gsk3b,Vcam1,Abca1,Dock7,Atf7ip,Bag3,Git1,Cldn5,Med13,Trappc11,Marcksl1,Golph3,Lmod1,Nucks1,Syncrip,Gfap,Ubap2l,Iqgap2,Map1b,Xrcc6,Serpinc1,Htt,Golga4,Pml,Glul,Map1a,Iqsec2,Tsc2,Cds2,Mtor,Trpm7,Trim44,Eps15,Rps6,Ehmt1,Camk2d,Steap3,Rif1,Kif1a,Atrx,Ssh3,Kalrn,Cfl1,Sorbs2,Rangap1,Clasp2,Ncf2
GO:0071375	Cellular response to peptide hormone stimulus	9	238	0.67	0.0267	1.57349	10090.ENSMUSP00000005188,10090.ENSMUSP00000023507,10090.ENSMUSP00000033880,10090.ENSMUSP00000068195,10090.ENSMUSP00000068374,10090.ENSMUSP00000080685,10090.ENSMUSP00000094986,10090.ENSMUSP00000112259,10090.ENSMUSP00000126849	Sh2b2,Gsk3b,Eif4ebp1,Rab31,Map1b,Dennd4c,Tsc2,Cfl1,Rangap1
GO:0071704	Organic substance metabolic process	79	6824	0.15	0.0267	1.57349	10090.ENSMUSP00000009699,10090.ENSMUSP00000009713,10090.ENSMUSP00000013773,10090.ENSMUSP00000019076,10090.ENSMUSP00000020461,10090.ENSMUSP00000021381,10090.ENSMUSP00000023507,10090.ENSMUSP00000025656,10090.ENSMUSP00000026663,10090.ENSMUSP00000029574,10090.ENSMUSP00000030010,10090.ENSMUSP00000031103,10090.ENSMUSP00000032182,10090.ENSMUSP00000032335,10090.ENSMUSP00000032762,10090.ENSMUSP00000033136…	Cdk9,Mkl2,Cad,Map2k3,Nfic,Pnn,Gsk3b,Aldh1a7,Cbx8,Vcam1,Abca1,Ugdh,Xpc,Atf7ip,Plin1,Bag3,Eif4ebp1,Pgm5,Bmp2k,Emsy,Pkn2,Irf2bpl,Oxsr1,Gtf3c4,Srrt,Med13,Thoc2,Myof,Ptpn13,Golph3,Fbxo10,Bod1l,Irf2bp1,Nucks1,Syncrip,Cwc22,Ppm1h,Rab31,Nup98,Xrcc6,Ppp1r12a,Ubap1,8030462N17Rik,Htt,Fkbp15,Pml,Glul,Htatsf1,Trio,Dennd1b,Spin1,Znhit6,Cds2,Mtor,Trpm7,Trim44,Eps15,Rps6,Ehmt1,Camk2d,Synpo2,Trim25,Kmt2b,Tnks1bp1…
GO:0033365	Protein localization to organelle	15	618	0.47	0.0285	1.54516	10090.ENSMUSP00000023507,10090.ENSMUSP00000025127,10090.ENSMUSP00000029414,10090.ENSMUSP00000037210,10090.ENSMUSP00000038983,10090.ENSMUSP00000057375,10090.ENSMUSP00000068530,10090.ENSMUSP00000078945,10090.ENSMUSP00000082816,10090.ENSMUSP00000094986,10090.ENSMUSP00000099790,10090.ENSMUSP00000109203,10090.ENSMUSP00000110611,10090.ENSMUSP00000112259,10090.ENSMUSP00000126849	Gsk3b,Mapre2,Ssr3,Git1,Fam21,Golph3,Nup98,Htt,Pml,Tsc2,Eps15,Atrx,Kalrn,Cfl1,Rangap1
GO:0071417	Cellular response to organonitrogen compound	14	549	0.49	0.0285	1.54516	10090.ENSMUSP00000005188,10090.ENSMUSP00000023507,10090.ENSMUSP00000029574,10090.ENSMUSP00000030399,10090.ENSMUSP00000033880,10090.ENSMUSP00000057375,10090.ENSMUSP00000068195,10090.ENSMUSP00000068374,10090.ENSMUSP00000078945,10090.ENSMUSP00000080685,10090.ENSMUSP00000094986,10090.ENSMUSP00000099510,10090.ENSMUSP00000112259,10090.ENSMUSP00000126849	Sh2b2,Gsk3b,Vcam1,Rragc,Eif4ebp1,Golph3,Rab31,Map1b,Htt,Dennd4c,Tsc2,Mtor,Cfl1,Rangap1
GO:0048193	Golgi vesicle transport	9	243	0.66	0.0299	1.52433	10090.ENSMUSP00000039243,10090.ENSMUSP00000047562,10090.ENSMUSP00000057375,10090.ENSMUSP00000068195,10090.ENSMUSP00000071078,10090.ENSMUSP00000078945,10090.ENSMUSP00000081880,10090.ENSMUSP00000099790,10090.ENSMUSP00000130696	Snx2,Trappc11,Golph3,Rab31,Cope,Htt,Golga4,Eps15,Myo18a
GO:1901653	Cellular response to peptide	10	299	0.61	0.0299	1.52433	10090.ENSMUSP00000005188,10090.ENSMUSP00000023507,10090.ENSMUSP00000029574,10090.ENSMUSP00000033880,10090.ENSMUSP00000068195,10090.ENSMUSP00000068374,10090.ENSMUSP00000080685,10090.ENSMUSP00000094986,10090.ENSMUSP00000112259,10090.ENSMUSP00000126849	Sh2b2,Gsk3b,Vcam1,Eif4ebp1,Rab31,Map1b,Dennd4c,Tsc2,Cfl1,Rangap1
GO:0009966	Regulation of signal transduction	40	2767	0.25	0.0308	1.51145	10090.ENSMUSP00000004684,10090.ENSMUSP00000005188,10090.ENSMUSP00000014421,10090.ENSMUSP00000019076,10090.ENSMUSP00000022698,10090.ENSMUSP00000022865,10090.ENSMUSP00000023151,10090.ENSMUSP00000023507,10090.ENSMUSP00000025127,10090.ENSMUSP00000029092,10090.ENSMUSP00000030010,10090.ENSMUSP00000030399,10090.ENSMUSP00000037210,10090.ENSMUSP00000037970,10090.ENSMUSP00000045036,10090.ENSMUSP00000048119…	Arhgef18,Sh2b2,Ankrd17,Map2k3,Dok2,Mtdh,Bcl6,Gsk3b,Mapre2,Arfgap1,Abca1,Rragc,Git1,Bmp2k,Myof,Ptpn13,Golph3,Nucks1,Bcl9l,Pvrl2,Htt,Pml,Sipa1l3,Chd8,Spin1,Iqsec2,Tsc2,Mtor,Phactr4,Trim44,Camk2d,Trim25,Steap3,Kalrn,Cfl1,Akap13,Sik3,Hipk2,Peg10,Trps1
GO:1902903	Regulation of supramolecular fiber organization	11	364	0.57	0.0331	1.48017	10090.ENSMUSP00000004684,10090.ENSMUSP00000061597,10090.ENSMUSP00000067685,10090.ENSMUSP00000068374,10090.ENSMUSP00000092223,10090.ENSMUSP00000099510,10090.ENSMUSP00000102034,10090.ENSMUSP00000109483,10090.ENSMUSP00000112259,10090.ENSMUSP00000117686,10090.ENSMUSP00000128460	Arhgef18,Lmod1,Iqgap2,Map1b,Map1a,Mtor,Synpo2,Ssh3,Cfl1,Akap13,Clasp2
GO:1902904	Negative regulation of supramolecular fiber organization	7	146	0.77	0.0331	1.48017	10090.ENSMUSP00000004684,10090.ENSMUSP00000061597,10090.ENSMUSP00000068374,10090.ENSMUSP00000092223,10090.ENSMUSP00000109483,10090.ENSMUSP00000112259,10090.ENSMUSP00000128460	Arhgef18,Lmod1,Map1b,Map1a,Ssh3,Cfl1,Clasp2
GO:0045792	Negative regulation of cell size	3	13	1.45	0.0346	1.46092	10090.ENSMUSP00000094986,10090.ENSMUSP00000099510,10090.ENSMUSP00000112259	Tsc2,Mtor,Cfl1
GO:0045935	Positive regulation of nucleobase-containing compound metabolic process	30	1859	0.3	0.0349	1.45717	10090.ENSMUSP00000009699,10090.ENSMUSP00000009713,10090.ENSMUSP00000019076,10090.ENSMUSP00000020461,10090.ENSMUSP00000022865,10090.ENSMUSP00000023507,10090.ENSMUSP00000024786,10090.ENSMUSP00000026663,10090.ENSMUSP00000029358,10090.ENSMUSP00000032182,10090.ENSMUSP00000032335,10090.ENSMUSP00000041070,10090.ENSMUSP00000044268,10090.ENSMUSP00000062576,10090.ENSMUSP00000068530,10090.ENSMUSP00000068559…	Cdk9,Mkl2,Map2k3,Nfic,Mtdh,Gsk3b,Tfeb,Cbx8,Nmd3,Xpc,Atf7ip,Irf2bpl,Med13,Nucks1,Nup98,Xrcc6,Ppp1r12a,Bcl9l,Pml,Chd8,Spin1,Tsc2,Mtor,Trim44,Camk2d,Kmt2b,Rif1,Atrx,Zfp609,Hipk2
GO:0051049	Regulation of transport	30	1862	0.3	0.0356	1.44855	10090.ENSMUSP00000004622,10090.ENSMUSP00000005188,10090.ENSMUSP00000023507,10090.ENSMUSP00000029092,10090.ENSMUSP00000030010,10090.ENSMUSP00000033136,10090.ENSMUSP00000034351,10090.ENSMUSP00000036065,10090.ENSMUSP00000037210,10090.ENSMUSP00000037970,10090.ENSMUSP00000042155,10090.ENSMUSP00000044677,10090.ENSMUSP00000057375,10090.ENSMUSP00000064691,10090.ENSMUSP00000068195,10090.ENSMUSP00000068374…	Gab2,Sh2b2,Gsk3b,Arfgap1,Abca1,Bag3,Rrad,Reep2,Git1,Bmp2k,Oxsr1,Thoc2,Golph3,Gfap,Rab31,Map1b,Ppp1r12a,Htt,Pml,Glul,Tsc2,Ehd2,Mtor,Camk2d,Kalrn,Cfl1,Lcp1,Rangap1,Clasp2,Myo18a
GO:0006468	Protein phosphorylation	17	785	0.42	0.0366	1.43652	10090.ENSMUSP00000009699,10090.ENSMUSP00000013773,10090.ENSMUSP00000019076,10090.ENSMUSP00000023507,10090.ENSMUSP00000037970,10090.ENSMUSP00000039566,10090.ENSMUSP00000042155,10090.ENSMUSP00000082816,10090.ENSMUSP00000087714,10090.ENSMUSP00000099510,10090.ENSMUSP00000099513,10090.ENSMUSP00000102009,10090.ENSMUSP00000110611,10090.ENSMUSP00000112259,10090.ENSMUSP00000117686,10090.ENSMUSP00000121032…	Cdk9,Cad,Map2k3,Gsk3b,Bmp2k,Pkn2,Oxsr1,Pml,Trio,Mtor,Trpm7,Camk2d,Kalrn,Cfl1,Akap13,Sik3,Hipk2
GO:0006913	Nucleocytoplasmic transport	8	199	0.69	0.0366	1.43652	10090.ENSMUSP00000023507,10090.ENSMUSP00000029358,10090.ENSMUSP00000044677,10090.ENSMUSP00000068530,10090.ENSMUSP00000082816,10090.ENSMUSP00000094986,10090.ENSMUSP00000112259,10090.ENSMUSP00000117686	Gsk3b,Nmd3,Thoc2,Nup98,Pml,Tsc2,Cfl1,Akap13
GO:1902680	Positive regulation of rna biosynthetic process	27	1603	0.31	0.0366	1.43652	10090.ENSMUSP00000009699,10090.ENSMUSP00000009713,10090.ENSMUSP00000019076,10090.ENSMUSP00000020461,10090.ENSMUSP00000022865,10090.ENSMUSP00000023507,10090.ENSMUSP00000024786,10090.ENSMUSP00000029358,10090.ENSMUSP00000032182,10090.ENSMUSP00000032335,10090.ENSMUSP00000041070,10090.ENSMUSP00000044268,10090.ENSMUSP00000062576,10090.ENSMUSP00000068530,10090.ENSMUSP00000068559,10090.ENSMUSP00000069257…	Cdk9,Mkl2,Map2k3,Nfic,Mtdh,Gsk3b,Tfeb,Nmd3,Xpc,Atf7ip,Irf2bpl,Med13,Nucks1,Nup98,Xrcc6,Ppp1r12a,Bcl9l,Pml,Chd8,Spin1,Tsc2,Mtor,Trim44,Kmt2b,Atrx,Zfp609,Hipk2
GO:0043254	Regulation of protein-containing complex assembly	12	437	0.53	0.0376	1.42481	10090.ENSMUSP00000023507,10090.ENSMUSP00000030010,10090.ENSMUSP00000032335,10090.ENSMUSP00000033880,10090.ENSMUSP00000061597,10090.ENSMUSP00000067685,10090.ENSMUSP00000068374,10090.ENSMUSP00000099510,10090.ENSMUSP00000109483,10090.ENSMUSP00000112259,10090.ENSMUSP00000116271,10090.ENSMUSP00000128460	Gsk3b,Abca1,Atf7ip,Eif4ebp1,Lmod1,Iqgap2,Map1b,Mtor,Ssh3,Cfl1,Lcp1,Clasp2
GO:0007030	Golgi organization	6	107	0.84	0.0384	1.41567	10090.ENSMUSP00000028509,10090.ENSMUSP00000047562,10090.ENSMUSP00000057375,10090.ENSMUSP00000078945,10090.ENSMUSP00000128460,10090.ENSMUSP00000130696	Gorasp2,Trappc11,Golph3,Htt,Clasp2,Myo18a
GO:0007613	Memory	7	152	0.75	0.0384	1.41567	10090.ENSMUSP00000087184,10090.ENSMUSP00000092223,10090.ENSMUSP00000099510,10090.ENSMUSP00000099513,10090.ENSMUSP00000103789,10090.ENSMUSP00000110611,10090.ENSMUSP00000126659	Chd8,Map1a,Mtor,Trpm7,Kmt2b,Kalrn,Cic
GO:0010506	Regulation of autophagy	9	257	0.63	0.0392	1.40671	10090.ENSMUSP00000022865,10090.ENSMUSP00000023507,10090.ENSMUSP00000024786,10090.ENSMUSP00000030399,10090.ENSMUSP00000033136,10090.ENSMUSP00000064691,10090.ENSMUSP00000078945,10090.ENSMUSP00000094986,10090.ENSMUSP00000099510	Mtdh,Gsk3b,Tfeb,Rragc,Bag3,Gfap,Htt,Tsc2,Mtor
GO:0010646	Regulation of cell communication	44	3215	0.22	0.0406	1.39147	10090.ENSMUSP00000004684,10090.ENSMUSP00000005188,10090.ENSMUSP00000014421,10090.ENSMUSP00000019076,10090.ENSMUSP00000022698,10090.ENSMUSP00000022865,10090.ENSMUSP00000023151,10090.ENSMUSP00000023507,10090.ENSMUSP00000025127,10090.ENSMUSP00000029092,10090.ENSMUSP00000030010,10090.ENSMUSP00000030399,10090.ENSMUSP00000037210,10090.ENSMUSP00000037970,10090.ENSMUSP00000045036,10090.ENSMUSP00000048119…	Arhgef18,Sh2b2,Ankrd17,Map2k3,Dok2,Mtdh,Bcl6,Gsk3b,Mapre2,Arfgap1,Abca1,Rragc,Git1,Bmp2k,Myof,Ptpn13,Golph3,Nucks1,Gfap,Map1b,Bcl9l,Pvrl2,Htt,Pml,Sipa1l3,Glul,Chd8,Map1a,Spin1,Iqsec2,Tsc2,Mtor,Phactr4,Trim44,Camk2d,Trim25,Steap3,Kalrn,Cfl1,Akap13,Sik3,Hipk2,Peg10,Trps1
GO:0051494	Negative regulation of cytoskeleton organization	7	154	0.75	0.0406	1.39147	10090.ENSMUSP00000004684,10090.ENSMUSP00000061597,10090.ENSMUSP00000068374,10090.ENSMUSP00000092223,10090.ENSMUSP00000109483,10090.ENSMUSP00000112259,10090.ENSMUSP00000128460	Arhgef18,Lmod1,Map1b,Map1a,Ssh3,Cfl1,Clasp2
GO:0080090	Regulation of primary metabolic process	64	5290	0.17	0.0406	1.39147	10090.ENSMUSP00000009699,10090.ENSMUSP00000009713,10090.ENSMUSP00000019076,10090.ENSMUSP00000020461,10090.ENSMUSP00000022698,10090.ENSMUSP00000022865,10090.ENSMUSP00000023151,10090.ENSMUSP00000023507,10090.ENSMUSP00000024786,10090.ENSMUSP00000026663,10090.ENSMUSP00000029358,10090.ENSMUSP00000030286,10090.ENSMUSP00000031862,10090.ENSMUSP00000032182,10090.ENSMUSP00000032335,10090.ENSMUSP00000033136…	Cdk9,Mkl2,Map2k3,Nfic,Dok2,Mtdh,Bcl6,Gsk3b,Tfeb,Cbx8,Nmd3,Dock7,Cbx3,Xpc,Atf7ip,Bag3,Eif4ebp1,Emsy,Irf2bpl,Oxsr1,Srrt,Med13,Ptpn13,Basp1,Bod1l,Chd4,Irf2bp1,Nucks1,Syncrip,Gfap,Nup98,Xrcc6,Serpinc1,Ppp1r12a,Bcl9l,Htt,Pml,Chd8,Trappc9,Map1a,Spin1,Tsc2,Foxs1,Mtor,Phactr4,Trim44,Ehmt1,Camk2d,Synpo2,Trim25,Kmt2b,Tnks1bp1,Wdhd1,Rif1,Atrx,Cfl1,Cbx5,Fam129a,Akap13,Zfp609,Hipk2,Cic,Trps1,Tcof1
GO:1901880	Negative regulation of protein depolymerization	5	70	0.94	0.0411	1.38616	10090.ENSMUSP00000061597,10090.ENSMUSP00000068374,10090.ENSMUSP00000092223,10090.ENSMUSP00000112259,10090.ENSMUSP00000128460	Lmod1,Map1b,Map1a,Cfl1,Clasp2
GO:0000122	Negative regulation of transcription by rna polymerase ii	18	881	0.4	0.0434	1.36251	10090.ENSMUSP00000020461,10090.ENSMUSP00000022865,10090.ENSMUSP00000023151,10090.ENSMUSP00000026663,10090.ENSMUSP00000032335,10090.ENSMUSP00000033136,10090.ENSMUSP00000041070,10090.ENSMUSP00000060054,10090.ENSMUSP00000061234,10090.ENSMUSP00000087184,10090.ENSMUSP00000096806,10090.ENSMUSP00000100002,10090.ENSMUSP00000108313,10090.ENSMUSP00000109203,10090.ENSMUSP00000113157,10090.ENSMUSP00000124133…	Nfic,Mtdh,Bcl6,Cbx8,Atf7ip,Bag3,Irf2bpl,Chd4,Irf2bp1,Chd8,Foxs1,Ehmt1,Rif1,Atrx,Cbx5,Hipk2,Cic,Trps1
GO:0010468	Regulation of gene expression	52	4041	0.2	0.0434	1.36251	10090.ENSMUSP00000009699,10090.ENSMUSP00000009713,10090.ENSMUSP00000014421,10090.ENSMUSP00000019076,10090.ENSMUSP00000020461,10090.ENSMUSP00000022865,10090.ENSMUSP00000023151,10090.ENSMUSP00000023507,10090.ENSMUSP00000024786,10090.ENSMUSP00000026663,10090.ENSMUSP00000031862,10090.ENSMUSP00000032182,10090.ENSMUSP00000032335,10090.ENSMUSP00000033136,10090.ENSMUSP00000033880,10090.ENSMUSP00000038216…	Cdk9,Mkl2,Ankrd17,Map2k3,Nfic,Mtdh,Bcl6,Gsk3b,Tfeb,Cbx8,Cbx3,Xpc,Atf7ip,Bag3,Eif4ebp1,Emsy,Irf2bpl,Cldn5,Srrt,Med13,Thoc2,Basp1,Chd4,Irf2bp1,Nucks1,Syncrip,Nup98,Xrcc6,Ppp1r12a,Bcl9l,Htt,Pml,Chd8,Trappc9,Spin1,Tsc2,Foxs1,Mtor,Trim44,Ehmt1,Trim25,Kmt2b,Wdhd1,Rif1,Atrx,Cbx5,Fam129a,Zfp609,Hipk2,Cic,Trps1,Tcof1
GO:0090164	Asymmetric golgi ribbon formation	2	2	2.09	0.0434	1.36251	10090.ENSMUSP00000057375,10090.ENSMUSP00000130696	Golph3,Myo18a
GO:0010629	Negative regulation of gene expression	29	1811	0.29	0.0442	1.35458	10090.ENSMUSP00000009699,10090.ENSMUSP00000020461,10090.ENSMUSP00000022865,10090.ENSMUSP00000023151,10090.ENSMUSP00000026663,10090.ENSMUSP00000031862,10090.ENSMUSP00000032335,10090.ENSMUSP00000033136,10090.ENSMUSP00000033880,10090.ENSMUSP00000041070,10090.ENSMUSP00000041925,10090.ENSMUSP00000043123,10090.ENSMUSP00000053943,10090.ENSMUSP00000060054,10090.ENSMUSP00000061234,10090.ENSMUSP00000063744…	Cdk9,Nfic,Mtdh,Bcl6,Cbx8,Cbx3,Atf7ip,Bag3,Eif4ebp1,Irf2bpl,Cldn5,Srrt,Basp1,Chd4,Irf2bp1,Syncrip,Xrcc6,Pml,Chd8,Foxs1,Ehmt1,Kmt2b,Wdhd1,Rif1,Atrx,Cbx5,Hipk2,Cic,Trps1
GO:0043434	Response to peptide hormone	11	385	0.54	0.0442	1.35458	10090.ENSMUSP00000005188,10090.ENSMUSP00000013773,10090.ENSMUSP00000023507,10090.ENSMUSP00000033880,10090.ENSMUSP00000068195,10090.ENSMUSP00000068374,10090.ENSMUSP00000080685,10090.ENSMUSP00000094986,10090.ENSMUSP00000099510,10090.ENSMUSP00000112259,10090.ENSMUSP00000126849	Sh2b2,Cad,Gsk3b,Eif4ebp1,Rab31,Map1b,Dennd4c,Tsc2,Mtor,Cfl1,Rangap1
GO:0006807	Nitrogen compound metabolic process	69	5878	0.16	0.0474	1.32422	10090.ENSMUSP00000009699,10090.ENSMUSP00000013773,10090.ENSMUSP00000019076,10090.ENSMUSP00000021381,10090.ENSMUSP00000023507,10090.ENSMUSP00000026663,10090.ENSMUSP00000029574,10090.ENSMUSP00000030010,10090.ENSMUSP00000031103,10090.ENSMUSP00000032182,10090.ENSMUSP00000032335,10090.ENSMUSP00000033136,10090.ENSMUSP00000033880,10090.ENSMUSP00000037970,10090.ENSMUSP00000038216,10090.ENSMUSP00000039566…	Cdk9,Cad,Map2k3,Pnn,Gsk3b,Cbx8,Vcam1,Abca1,Ugdh,Xpc,Atf7ip,Bag3,Eif4ebp1,Bmp2k,Emsy,Pkn2,Irf2bpl,Oxsr1,Gtf3c4,Srrt,Med13,Thoc2,Ptpn13,Golph3,Fbxo10,Bod1l,Irf2bp1,Nucks1,Syncrip,Cwc22,Ppm1h,Nup98,Xrcc6,Ppp1r12a,Ubap1,8030462N17Rik,Htt,Fkbp15,Pml,Glul,Htatsf1,Trio,Spin1,Znhit6,Slc7a2,Mtor,Trpm7,Trim44,Rps6,Ehmt1,Camk2d,Synpo2,Trim25,Kmt2b,Tnks1bp1,Wdhd1,Rif1,Atrx,Ssh3,Kalrn,Cfl1,Adcy9,Akap13,Sik3,H…
GO:0016197	Endosomal transport	8	212	0.66	0.0474	1.32422	10090.ENSMUSP00000030010,10090.ENSMUSP00000038983,10090.ENSMUSP00000039243,10090.ENSMUSP00000078945,10090.ENSMUSP00000092082,10090.ENSMUSP00000096397,10090.ENSMUSP00000099790,10090.ENSMUSP00000103261	Abca1,Fam21,Snx2,Htt,Dennd1b,Ehd2,Eps15,Lrba
GO:0051147	Regulation of muscle cell differentiation	7	161	0.73	0.048	1.31876	10090.ENSMUSP00000009699,10090.ENSMUSP00000014421,10090.ENSMUSP00000023507,10090.ENSMUSP00000054337,10090.ENSMUSP00000096397,10090.ENSMUSP00000099510,10090.ENSMUSP00000117686	Cdk9,Ankrd17,Gsk3b,Ppapdc3,Ehd2,Mtor,Akap13
GO:0098696	Regulation of neurotransmitter receptor localization to postsynaptic specialization membrane	3	16	1.36	0.0488	1.31158	10090.ENSMUSP00000023507,10090.ENSMUSP00000093995,10090.ENSMUSP00000110611	Gsk3b,Iqsec2,Kalrn
GO:0007154	Cell communication	53	4179	0.19	0.0499	1.3019	10090.ENSMUSP00000004622,10090.ENSMUSP00000004684,10090.ENSMUSP00000005188,10090.ENSMUSP00000019076,10090.ENSMUSP00000022698,10090.ENSMUSP00000022865,10090.ENSMUSP00000023151,10090.ENSMUSP00000023507,10090.ENSMUSP00000024786,10090.ENSMUSP00000025831,10090.ENSMUSP00000029402,10090.ENSMUSP00000029574,10090.ENSMUSP00000030010,10090.ENSMUSP00000030286,10090.ENSMUSP00000030399,10090.ENSMUSP00000033136…	Gab2,Arhgef18,Sh2b2,Map2k3,Dok2,Mtdh,Bcl6,Gsk3b,Tfeb,Dock8,Slc33a1,Vcam1,Abca1,Dock7,Rragc,Bag3,Eif4ebp1,Rrad,Git1,Pkn2,Cldn5,Oxsr1,Iqgap2,Rab31,Ppp1r12a,Bcl9l,Htt,Pml,Glul,Chd8,Fyb,Dennd1b,Spin1,Tsc2,Cds2,Mtor,Phactr4,Rps6,Lrba,Atrx,Kalrn,Dtna,Adcy9,Lcp1,Akap13,Sik3,Sorbs2,Pitpnm2,Hipk2,Rangap1,Clasp2,Trps1,Arhgap32

## Sheet: Q4_4 hr Ontology
#term ID	term description	observed gene count	background gene count	strength	false discovery rate	"-LOG10(FDR)"	matching proteins in your network (IDs)	matching proteins in your network (labels)
GO:0050789	Regulation of biological process	114	9973	0.23	2.73e-11	10.5638	10090.ENSMUSP00000000369,10090.ENSMUSP00000001279,10090.ENSMUSP00000004622,10090.ENSMUSP00000006037,10090.ENSMUSP00000009699,10090.ENSMUSP00000013886,10090.ENSMUSP00000020188,10090.ENSMUSP00000020315,10090.ENSMUSP00000020695,10090.ENSMUSP00000021689,10090.ENSMUSP00000022793,10090.ENSMUSP00000023467,10090.ENSMUSP00000023487,10090.ENSMUSP00000023538,10090.ENSMUSP00000023741,10090.ENSMUSP00000024709…	Rem1,Lsr,Gab2,Ncoa2,Cdk9,Ppp1r12c,Ifngr1,Cand1,Tns3,Evl,Acin1,Pak2,Arhgap31,Mylk,Kmt2d,Cd2ap,Caskin1,Ighmbp2,Baiap2,Slc39a10,Dgkd,Abl2,Vim,Itgav,Apoa1bp,Bcar3,Dock7,Wasl,Itpr1,Sema4b,Parva,Lamtor1,Bag3,Kank2,Map4,Reep2,Jcad,Rbm3,Pak4,Irf2bpl,Spag9,Kif16b,Dok3,Syne2,Ptpn13,Gas2l1,Rasd1,Epb4.1l2,Irf2bp1,Ctnnd1,Cast,Arhgap20,Map1b,Abcd2,Ppp1r12a,Helz,Abl1,Frmd4a,Dapk1,Tfe3,Ablim1,Dab2,Uri1,Pkd2,Smar…
GO:0065007	Biological regulation	117	10591	0.22	3.73e-11	10.4283	10090.ENSMUSP00000000369,10090.ENSMUSP00000001279,10090.ENSMUSP00000004622,10090.ENSMUSP00000006037,10090.ENSMUSP00000009699,10090.ENSMUSP00000013886,10090.ENSMUSP00000020188,10090.ENSMUSP00000020315,10090.ENSMUSP00000020695,10090.ENSMUSP00000021689,10090.ENSMUSP00000022793,10090.ENSMUSP00000023467,10090.ENSMUSP00000023487,10090.ENSMUSP00000023538,10090.ENSMUSP00000023741,10090.ENSMUSP00000024709…	Rem1,Lsr,Gab2,Ncoa2,Cdk9,Ppp1r12c,Ifngr1,Cand1,Tns3,Evl,Acin1,Pak2,Arhgap31,Mylk,Kmt2d,Cd2ap,Caskin1,Ighmbp2,Baiap2,Slc39a10,Dgkd,Abl2,Vim,Itgav,Apoa1bp,Bcar3,Dock7,Wasl,Itpr1,Sema4b,Parva,Lamtor1,Bag3,Heph,Kank2,Map4,Reep2,Jcad,Rbm3,Pak4,Irf2bpl,Spag9,Kif16b,Dok3,Syne2,Ptpn13,Gas2l1,Rasd1,Epb4.1l2,Irf2bp1,Ctnnd1,Cast,Arhgap20,Map1b,Abcd2,Ppp1r12a,Helz,Abl1,Frmd4a,Dapk1,Tfe3,Ablim1,Dab2,Dennd4c,U…
GO:0007010	Cytoskeleton organization	34	1064	0.68	1.72e-10	9.76447	10090.ENSMUSP00000021689,10090.ENSMUSP00000024709,10090.ENSMUSP00000024854,10090.ENSMUSP00000026436,10090.ENSMUSP00000027888,10090.ENSMUSP00000028062,10090.ENSMUSP00000030286,10090.ENSMUSP00000031695,10090.ENSMUSP00000033030,10090.ENSMUSP00000035055,10090.ENSMUSP00000039707,10090.ENSMUSP00000047697,10090.ENSMUSP00000050275,10090.ENSMUSP00000055122,10090.ENSMUSP00000068374,10090.ENSMUSP00000069257…	Evl,Cd2ap,Clip4,Baiap2,Abl2,Vim,Dock7,Wasl,Parva,Map4,Micall2,Syne2,Gas2l1,Epb4.1l2,Map1b,Ppp1r12a,Pard3b,Abl1,Ablim1,Nefh,Tjp1,Sptbn1,Gas7,Cdc42bpa,Epb4.1l3,Camsap1,Add1,Map7,Mapkap1,Abi1,Ssh1,Tnik,Camsap3,Clasp1
GO:0050794	Regulation of cellular process	109	9541	0.23	1.72e-10	9.76447	10090.ENSMUSP00000000369,10090.ENSMUSP00000004622,10090.ENSMUSP00000006037,10090.ENSMUSP00000009699,10090.ENSMUSP00000013886,10090.ENSMUSP00000020188,10090.ENSMUSP00000020315,10090.ENSMUSP00000020695,10090.ENSMUSP00000021689,10090.ENSMUSP00000022793,10090.ENSMUSP00000023467,10090.ENSMUSP00000023487,10090.ENSMUSP00000023538,10090.ENSMUSP00000023741,10090.ENSMUSP00000024709,10090.ENSMUSP00000024958…	Rem1,Gab2,Ncoa2,Cdk9,Ppp1r12c,Ifngr1,Cand1,Tns3,Evl,Acin1,Pak2,Arhgap31,Mylk,Kmt2d,Cd2ap,Caskin1,Ighmbp2,Baiap2,Slc39a10,Dgkd,Abl2,Vim,Itgav,Bcar3,Dock7,Wasl,Itpr1,Sema4b,Lamtor1,Bag3,Kank2,Map4,Reep2,Jcad,Rbm3,Pak4,Irf2bpl,Spag9,Kif16b,Dok3,Syne2,Ptpn13,Gas2l1,Rasd1,Epb4.1l2,Irf2bp1,Ctnnd1,Cast,Arhgap20,Map1b,Abcd2,Ppp1r12a,Abl1,Frmd4a,Dapk1,Tfe3,Ablim1,Dab2,Uri1,Pkd2,Smarca1,Chd8,Sybu,Trio,Nefh…
GO:0031175	Neuron projection development	27	697	0.76	9.39e-10	9.02733	10090.ENSMUSP00000021689,10090.ENSMUSP00000023467,10090.ENSMUSP00000026436,10090.ENSMUSP00000027888,10090.ENSMUSP00000030286,10090.ENSMUSP00000031695,10090.ENSMUSP00000032754,10090.ENSMUSP00000035055,10090.ENSMUSP00000039707,10090.ENSMUSP00000040486,10090.ENSMUSP00000068374,10090.ENSMUSP00000075167,10090.ENSMUSP00000078336,10090.ENSMUSP00000087714,10090.ENSMUSP00000091061,10090.ENSMUSP00000097547…	Evl,Pak2,Baiap2,Abl2,Dock7,Wasl,Sema4b,Map4,Micall2,Pak4,Map1b,Abl1,Ablim1,Trio,Nefh,Fyn,Jun,Gas7,Epb4.1l3,Pak3,Camsap1,Kalrn,Arid1b,Abi1,Tnik,Camsap3,Tiam1
GO:0000902	Cell morphogenesis	27	739	0.74	2.94e-09	8.53165	10090.ENSMUSP00000021689,10090.ENSMUSP00000027888,10090.ENSMUSP00000028499,10090.ENSMUSP00000030286,10090.ENSMUSP00000031695,10090.ENSMUSP00000032754,10090.ENSMUSP00000033030,10090.ENSMUSP00000039707,10090.ENSMUSP00000068374,10090.ENSMUSP00000075167,10090.ENSMUSP00000078336,10090.ENSMUSP00000079689,10090.ENSMUSP00000087714,10090.ENSMUSP00000091061,10090.ENSMUSP00000097547,10090.ENSMUSP00000104322…	Evl,Abl2,Itgav,Dock7,Wasl,Sema4b,Parva,Micall2,Map1b,Abl1,Ablim1,Dab2,Trio,Nefh,Fyn,Gas7,Epb4.1l3,Pak3,Add1,Kalrn,Map7,Abi1,Ssh1,Tnik,Tiam1,Myo9b,Mef2c
GO:0120036	Plasma membrane bounded cell projection organization	32	1072	0.65	2.94e-09	8.53165	10090.ENSMUSP00000021689,10090.ENSMUSP00000023467,10090.ENSMUSP00000023538,10090.ENSMUSP00000026436,10090.ENSMUSP00000027888,10090.ENSMUSP00000030286,10090.ENSMUSP00000031695,10090.ENSMUSP00000032754,10090.ENSMUSP00000033030,10090.ENSMUSP00000035055,10090.ENSMUSP00000039707,10090.ENSMUSP00000040486,10090.ENSMUSP00000068374,10090.ENSMUSP00000068940,10090.ENSMUSP00000075167,10090.ENSMUSP00000078336…	Evl,Pak2,Mylk,Baiap2,Abl2,Dock7,Wasl,Sema4b,Parva,Map4,Micall2,Pak4,Map1b,Abcd2,Abl1,Ablim1,Pkd2,Trio,Nefh,Fyn,Jun,Gas7,Epb4.1l3,Pak3,Camsap1,Kalrn,Arid1b,Abi1,Tnik,Camsap3,Tiam1,Myo9b
GO:0048468	Cell development	40	1730	0.54	6.15e-09	8.21112	10090.ENSMUSP00000001279,10090.ENSMUSP00000020188,10090.ENSMUSP00000021689,10090.ENSMUSP00000023467,10090.ENSMUSP00000023741,10090.ENSMUSP00000026436,10090.ENSMUSP00000027888,10090.ENSMUSP00000028062,10090.ENSMUSP00000028499,10090.ENSMUSP00000030286,10090.ENSMUSP00000031695,10090.ENSMUSP00000032754,10090.ENSMUSP00000033030,10090.ENSMUSP00000035055,10090.ENSMUSP00000039707,10090.ENSMUSP00000040486…	Lsr,Ifngr1,Evl,Pak2,Kmt2d,Baiap2,Abl2,Vim,Itgav,Dock7,Wasl,Sema4b,Parva,Map4,Micall2,Pak4,Map1b,Abl1,Ablim1,Dab2,Trio,Nefh,Tjp2,Fyn,Tjp1,Jun,Gas7,Pbrm1,Epb4.1l3,Pak3,Camsap1,Kalrn,Arid1b,Map7,Abi1,Tnik,Camsap3,Tiam1,Mef2c,Rhox5
GO:0048666	Neuron development	28	855	0.69	7.96e-09	8.09909	10090.ENSMUSP00000021689,10090.ENSMUSP00000023467,10090.ENSMUSP00000026436,10090.ENSMUSP00000027888,10090.ENSMUSP00000030286,10090.ENSMUSP00000031695,10090.ENSMUSP00000032754,10090.ENSMUSP00000035055,10090.ENSMUSP00000039707,10090.ENSMUSP00000040486,10090.ENSMUSP00000068374,10090.ENSMUSP00000075167,10090.ENSMUSP00000078336,10090.ENSMUSP00000087714,10090.ENSMUSP00000091061,10090.ENSMUSP00000097547…	Evl,Pak2,Baiap2,Abl2,Dock7,Wasl,Sema4b,Map4,Micall2,Pak4,Map1b,Abl1,Ablim1,Trio,Nefh,Fyn,Jun,Gas7,Epb4.1l3,Pak3,Camsap1,Kalrn,Arid1b,Abi1,Tnik,Camsap3,Tiam1,Mef2c
GO:0048522	Positive regulation of cellular process	74	5407	0.31	2.63e-08	7.58004	10090.ENSMUSP00000004622,10090.ENSMUSP00000006037,10090.ENSMUSP00000009699,10090.ENSMUSP00000020188,10090.ENSMUSP00000020315,10090.ENSMUSP00000020695,10090.ENSMUSP00000021689,10090.ENSMUSP00000022793,10090.ENSMUSP00000023467,10090.ENSMUSP00000023538,10090.ENSMUSP00000023741,10090.ENSMUSP00000024709,10090.ENSMUSP00000026436,10090.ENSMUSP00000027131,10090.ENSMUSP00000027888,10090.ENSMUSP00000028062…	Gab2,Ncoa2,Cdk9,Ifngr1,Cand1,Tns3,Evl,Acin1,Pak2,Mylk,Kmt2d,Cd2ap,Baiap2,Slc39a10,Abl2,Vim,Itgav,Bcar3,Dock7,Wasl,Itpr1,Sema4b,Lamtor1,Bag3,Jcad,Rbm3,Pak4,Irf2bpl,Spag9,Syne2,Epb4.1l2,Ctnnd1,Cast,Map1b,Abcd2,Ppp1r12a,Abl1,Frmd4a,Dapk1,Tfe3,Ablim1,Dab2,Pkd2,Smarca1,Chd8,Sybu,Sept9,Fyn,Tjp1,Sptbn1,Slc30a2,Jun,Mavs,Rreb1,Tnks1bp1,Pbrm1,Pak3,Itsn1,Add1,Kalrn,Arid1b,Whsc1l1,Fam129a,Mapkap1,Abi1,Hnrnpm…
GO:0009987	Cellular process	126	13330	0.15	3.17e-08	7.49894	10090.ENSMUSP00000000369,10090.ENSMUSP00000001279,10090.ENSMUSP00000004622,10090.ENSMUSP00000006037,10090.ENSMUSP00000009699,10090.ENSMUSP00000013886,10090.ENSMUSP00000020188,10090.ENSMUSP00000020315,10090.ENSMUSP00000020695,10090.ENSMUSP00000021689,10090.ENSMUSP00000022793,10090.ENSMUSP00000023467,10090.ENSMUSP00000023487,10090.ENSMUSP00000023538,10090.ENSMUSP00000023741,10090.ENSMUSP00000024709…	Rem1,Lsr,Gab2,Ncoa2,Cdk9,Ppp1r12c,Ifngr1,Cand1,Tns3,Evl,Acin1,Pak2,Arhgap31,Mylk,Kmt2d,Cd2ap,Clip4,Caskin1,Ighmbp2,Pip5k1b,Baiap2,Slc39a10,Dgkd,Abl2,Vim,Itgav,Apoa1bp,Bcar3,Dock7,Necap2,Wasl,Itpr1,Sema4b,Parva,Lamtor1,Bag3,Heph,Kank2,Map4,Reep2,Jcad,Rbm3,Micall2,Pak4,Irf2bpl,Spag9,Kif16b,Rcsd1,Sept14,Dok3,Syne2,Ptpn13,Gas2l1,Phkb,Rasd1,Epb4.1l2,Irf2bp1,Ctnnd1,Cast,Arhgap20,Map1b,Abcd2,Ppp1r12a,He…
GO:0030182	Neuron differentiation	30	1056	0.63	3.17e-08	7.49894	10090.ENSMUSP00000021689,10090.ENSMUSP00000023467,10090.ENSMUSP00000025751,10090.ENSMUSP00000026436,10090.ENSMUSP00000027888,10090.ENSMUSP00000030286,10090.ENSMUSP00000031695,10090.ENSMUSP00000032754,10090.ENSMUSP00000035055,10090.ENSMUSP00000039707,10090.ENSMUSP00000040486,10090.ENSMUSP00000068374,10090.ENSMUSP00000075167,10090.ENSMUSP00000078336,10090.ENSMUSP00000086366,10090.ENSMUSP00000087714…	Evl,Pak2,Ighmbp2,Baiap2,Abl2,Dock7,Wasl,Sema4b,Map4,Micall2,Pak4,Map1b,Abl1,Ablim1,Smarca1,Trio,Nefh,Fyn,Jun,Gas7,Epb4.1l3,Pak3,Camsap1,Kalrn,Arid1b,Abi1,Tnik,Camsap3,Tiam1,Mef2c
GO:0032879	Regulation of localization	50	2806	0.43	3.79e-08	7.42136	10090.ENSMUSP00000000369,10090.ENSMUSP00000004622,10090.ENSMUSP00000020188,10090.ENSMUSP00000021689,10090.ENSMUSP00000023538,10090.ENSMUSP00000024709,10090.ENSMUSP00000028062,10090.ENSMUSP00000028499,10090.ENSMUSP00000029708,10090.ENSMUSP00000030286,10090.ENSMUSP00000031695,10090.ENSMUSP00000032192,10090.ENSMUSP00000032754,10090.ENSMUSP00000033131,10090.ENSMUSP00000033136,10090.ENSMUSP00000036065…	Rem1,Gab2,Ifngr1,Evl,Mylk,Cd2ap,Vim,Itgav,Apoa1bp,Dock7,Wasl,Itpr1,Sema4b,Lamtor1,Bag3,Reep2,Jcad,Spag9,Syne2,Epb4.1l2,Map1b,Ppp1r12a,Abl1,Frmd4a,Dapk1,Dab2,Pkd2,Sybu,Nefh,Fyn,Rhbdf2,Tjp1,Sptbn1,Slc30a2,Jun,Mavs,Rreb1,Pak3,Itsn1,Add1,Kalrn,Hnrnpm,Ssh1,Tnik,Camsap3,Tiam1,Pnpla2,Mef2c,Wnk3,Clasp1
GO:0048519	Negative regulation of biological process	71	5108	0.32	3.79e-08	7.42136	10090.ENSMUSP00000000369,10090.ENSMUSP00000006037,10090.ENSMUSP00000009699,10090.ENSMUSP00000020188,10090.ENSMUSP00000021689,10090.ENSMUSP00000022793,10090.ENSMUSP00000023467,10090.ENSMUSP00000023741,10090.ENSMUSP00000024709,10090.ENSMUSP00000025751,10090.ENSMUSP00000027131,10090.ENSMUSP00000027888,10090.ENSMUSP00000028062,10090.ENSMUSP00000028499,10090.ENSMUSP00000029708,10090.ENSMUSP00000030286…	Rem1,Ncoa2,Cdk9,Ifngr1,Evl,Acin1,Pak2,Kmt2d,Cd2ap,Ighmbp2,Slc39a10,Abl2,Vim,Itgav,Apoa1bp,Dock7,Wasl,Itpr1,Sema4b,Bag3,Kank2,Map4,Rbm3,Pak4,Irf2bpl,Ptpn13,Gas2l1,Rasd1,Irf2bp1,Ctnnd1,Cast,Map1b,Abcd2,Helz,Abl1,Frmd4a,Dapk1,Tfe3,Dab2,Uri1,Pkd2,Chd8,Trio,Tjp2,Fyn,Rhbdf2,Tjp1,Vdac1,Sptbn1,Jun,Mavs,Rreb1,Oxr1,Pbrm1,Itsn1,Camsap1,Add1,Kalrn,Cbx5,Whsc1l1,Fam129a,Mapkap1,Ssh1,Pag1,Camsap3,Zfp219,Pnpla2,…
GO:0016043	Cellular component organization	68	4769	0.33	3.92e-08	7.40671	10090.ENSMUSP00000001279,10090.ENSMUSP00000020315,10090.ENSMUSP00000021689,10090.ENSMUSP00000022793,10090.ENSMUSP00000023467,10090.ENSMUSP00000023538,10090.ENSMUSP00000023741,10090.ENSMUSP00000024709,10090.ENSMUSP00000024854,10090.ENSMUSP00000025751,10090.ENSMUSP00000026436,10090.ENSMUSP00000027888,10090.ENSMUSP00000028062,10090.ENSMUSP00000028499,10090.ENSMUSP00000029708,10090.ENSMUSP00000030286…	Lsr,Cand1,Evl,Acin1,Pak2,Mylk,Kmt2d,Cd2ap,Clip4,Ighmbp2,Baiap2,Abl2,Vim,Itgav,Apoa1bp,Dock7,Wasl,Sema4b,Parva,Lamtor1,Bag3,Map4,Reep2,Micall2,Pak4,Syne2,Gas2l1,Epb4.1l2,Ctnnd1,Map1b,Abcd2,Ppp1r12a,Pard3b,Abl1,Ablim1,Dab2,Pkd2,Smarca1,Chd8,Sybu,Trio,Nefh,Fyn,Tjp1,Sptbn1,Jun,Gas7,Cdc42bpa,Ppfibp1,Pbrm1,Epb4.1l3,Pak3,Camsap1,Add1,Kalrn,Arid1b,Map7,Whsc1l1,Mapkap1,Abi1,Ssh1,Tnik,Camsap3,Tiam1,Pnpla2,…
GO:0007399	Nervous system development	44	2358	0.45	1.89e-07	6.72354	10090.ENSMUSP00000001279,10090.ENSMUSP00000020188,10090.ENSMUSP00000021689,10090.ENSMUSP00000023467,10090.ENSMUSP00000025751,10090.ENSMUSP00000026436,10090.ENSMUSP00000027888,10090.ENSMUSP00000028062,10090.ENSMUSP00000030286,10090.ENSMUSP00000031695,10090.ENSMUSP00000032192,10090.ENSMUSP00000032754,10090.ENSMUSP00000033136,10090.ENSMUSP00000035055,10090.ENSMUSP00000039707,10090.ENSMUSP00000040486…	Lsr,Ifngr1,Evl,Pak2,Ighmbp2,Baiap2,Abl2,Vim,Dock7,Wasl,Itpr1,Sema4b,Bag3,Map4,Micall2,Pak4,Irf2bpl,Spag9,Syne2,Map1b,Abcd2,Abl1,Ablim1,Dab2,Pkd2,Smarca1,Chd8,Sybu,Trio,Nefh,Fyn,Jun,Gas7,Epb4.1l3,Pak3,Itsn1,Camsap1,Kalrn,Arid1b,Abi1,Tnik,Camsap3,Tiam1,Mef2c
GO:0030029	Actin filament-based process	21	551	0.76	1.99e-07	6.70115	10090.ENSMUSP00000021689,10090.ENSMUSP00000024709,10090.ENSMUSP00000026436,10090.ENSMUSP00000027888,10090.ENSMUSP00000031695,10090.ENSMUSP00000033030,10090.ENSMUSP00000039707,10090.ENSMUSP00000047697,10090.ENSMUSP00000050275,10090.ENSMUSP00000055122,10090.ENSMUSP00000075167,10090.ENSMUSP00000099652,10090.ENSMUSP00000104322,10090.ENSMUSP00000106746,10090.ENSMUSP00000108300,10090.ENSMUSP00000109979…	Evl,Cd2ap,Baiap2,Abl2,Wasl,Parva,Micall2,Syne2,Gas2l1,Epb4.1l2,Abl1,Tjp1,Gas7,Cdc42bpa,Epb4.1l3,Add1,Mapkap1,Abi1,Ssh1,Tnik,Myo9b
GO:0022008	Neurogenesis	37	1784	0.49	4.16e-07	6.38091	10090.ENSMUSP00000020188,10090.ENSMUSP00000021689,10090.ENSMUSP00000023467,10090.ENSMUSP00000025751,10090.ENSMUSP00000026436,10090.ENSMUSP00000027888,10090.ENSMUSP00000028062,10090.ENSMUSP00000030286,10090.ENSMUSP00000031695,10090.ENSMUSP00000032192,10090.ENSMUSP00000032754,10090.ENSMUSP00000035055,10090.ENSMUSP00000039707,10090.ENSMUSP00000040486,10090.ENSMUSP00000042271,10090.ENSMUSP00000047697…	Ifngr1,Evl,Pak2,Ighmbp2,Baiap2,Abl2,Vim,Dock7,Wasl,Itpr1,Sema4b,Map4,Micall2,Pak4,Spag9,Syne2,Map1b,Abl1,Ablim1,Dab2,Smarca1,Trio,Nefh,Fyn,Jun,Gas7,Epb4.1l3,Pak3,Itsn1,Camsap1,Kalrn,Arid1b,Abi1,Tnik,Camsap3,Tiam1,Mef2c
GO:1902903	Regulation of supramolecular fiber organization	17	364	0.85	5.43e-07	6.2652	10090.ENSMUSP00000021689,10090.ENSMUSP00000023467,10090.ENSMUSP00000026436,10090.ENSMUSP00000031695,10090.ENSMUSP00000034717,10090.ENSMUSP00000050275,10090.ENSMUSP00000068374,10090.ENSMUSP00000075167,10090.ENSMUSP00000099652,10090.ENSMUSP00000099902,10090.ENSMUSP00000108485,10090.ENSMUSP00000109804,10090.ENSMUSP00000109979,10090.ENSMUSP00000124312,10090.ENSMUSP00000125993,10090.ENSMUSP00000132547…	Evl,Pak2,Baiap2,Wasl,Kank2,Gas2l1,Map1b,Abl1,Tjp1,Sptbn1,Pak3,Camsap1,Add1,Ssh1,Camsap3,Mef2c,Clasp1
GO:1902904	Negative regulation of supramolecular fiber organization	12	146	1.09	5.43e-07	6.2652	10090.ENSMUSP00000021689,10090.ENSMUSP00000023467,10090.ENSMUSP00000034717,10090.ENSMUSP00000050275,10090.ENSMUSP00000068374,10090.ENSMUSP00000099652,10090.ENSMUSP00000099902,10090.ENSMUSP00000109804,10090.ENSMUSP00000109979,10090.ENSMUSP00000124312,10090.ENSMUSP00000125993,10090.ENSMUSP00000140019	Evl,Pak2,Kank2,Gas2l1,Map1b,Tjp1,Sptbn1,Camsap1,Add1,Ssh1,Camsap3,Clasp1
GO:0035556	Intracellular signal transduction	32	1402	0.53	7.08e-07	6.14997	10090.ENSMUSP00000004622,10090.ENSMUSP00000023467,10090.ENSMUSP00000023487,10090.ENSMUSP00000026436,10090.ENSMUSP00000027517,10090.ENSMUSP00000028499,10090.ENSMUSP00000029766,10090.ENSMUSP00000030286,10090.ENSMUSP00000032192,10090.ENSMUSP00000040486,10090.ENSMUSP00000042271,10090.ENSMUSP00000046695,10090.ENSMUSP00000051959,10090.ENSMUSP00000075167,10090.ENSMUSP00000076666,10090.ENSMUSP00000079689…	Gab2,Pak2,Arhgap31,Baiap2,Dgkd,Itgav,Bcar3,Dock7,Itpr1,Pak4,Spag9,Dok3,Rasd1,Abl1,Dapk1,Dab2,Pkd2,Jun,Mavs,Cdc42bpa,Pak3,Rasgrp2,Itsn1,Kalrn,Mapkap1,Pag1,Tnik,Tiam1,Myo9b,Mef2c,Arhgap32,Wnk3
GO:0048699	Generation of neurons	35	1660	0.5	7.08e-07	6.14997	10090.ENSMUSP00000021689,10090.ENSMUSP00000023467,10090.ENSMUSP00000025751,10090.ENSMUSP00000026436,10090.ENSMUSP00000027888,10090.ENSMUSP00000028062,10090.ENSMUSP00000030286,10090.ENSMUSP00000031695,10090.ENSMUSP00000032192,10090.ENSMUSP00000032754,10090.ENSMUSP00000035055,10090.ENSMUSP00000039707,10090.ENSMUSP00000040486,10090.ENSMUSP00000042271,10090.ENSMUSP00000068374,10090.ENSMUSP00000075167…	Evl,Pak2,Ighmbp2,Baiap2,Abl2,Vim,Dock7,Wasl,Itpr1,Sema4b,Map4,Micall2,Pak4,Spag9,Map1b,Abl1,Ablim1,Dab2,Smarca1,Trio,Nefh,Fyn,Jun,Gas7,Epb4.1l3,Pak3,Itsn1,Camsap1,Kalrn,Arid1b,Abi1,Tnik,Camsap3,Tiam1,Mef2c
GO:0051716	Cellular response to stimulus	71	5497	0.29	7.08e-07	6.14997	10090.ENSMUSP00000000369,10090.ENSMUSP00000004622,10090.ENSMUSP00000006037,10090.ENSMUSP00000009699,10090.ENSMUSP00000013886,10090.ENSMUSP00000020188,10090.ENSMUSP00000021689,10090.ENSMUSP00000023467,10090.ENSMUSP00000023487,10090.ENSMUSP00000023538,10090.ENSMUSP00000024958,10090.ENSMUSP00000026436,10090.ENSMUSP00000027517,10090.ENSMUSP00000027888,10090.ENSMUSP00000028062,10090.ENSMUSP00000028499…	Rem1,Gab2,Ncoa2,Cdk9,Ppp1r12c,Ifngr1,Evl,Pak2,Arhgap31,Mylk,Caskin1,Baiap2,Dgkd,Abl2,Vim,Itgav,Bcar3,Dock7,Itpr1,Sema4b,Parva,Lamtor1,Bag3,Pak4,Spag9,Kif16b,Rcsd1,Dok3,Gas2l1,Rasd1,Ctnnd1,Arhgap20,Map1b,Ppp1r12a,Abl1,Dapk1,Dab2,Dennd4c,Uri1,Pkd2,Chd8,Nefh,Tjp2,Fyn,Tjp1,Sptbn1,Jun,Frmpd1,Mavs,Oxr1,Cdc42bpa,Tnks1bp1,Pak3,Rasgrp2,Itsn1,Add1,Kalrn,Cbx5,Fam129a,Mapkap1,Abi1,Hnrnpm,Ssh1,Pag1,Tnik,Tiam1…
GO:0120039	Plasma membrane bounded cell projection morphogenesis	19	484	0.77	7.08e-07	6.14997	10090.ENSMUSP00000021689,10090.ENSMUSP00000027888,10090.ENSMUSP00000030286,10090.ENSMUSP00000031695,10090.ENSMUSP00000032754,10090.ENSMUSP00000068374,10090.ENSMUSP00000075167,10090.ENSMUSP00000078336,10090.ENSMUSP00000087714,10090.ENSMUSP00000091061,10090.ENSMUSP00000097547,10090.ENSMUSP00000104322,10090.ENSMUSP00000108300,10090.ENSMUSP00000108485,10090.ENSMUSP00000110611,10090.ENSMUSP00000118491…	Evl,Abl2,Dock7,Wasl,Sema4b,Map1b,Abl1,Ablim1,Trio,Nefh,Fyn,Gas7,Epb4.1l3,Pak3,Kalrn,Abi1,Tnik,Tiam1,Myo9b
GO:0051494	Negative regulation of cytoskeleton organization	12	154	1.07	7.19e-07	6.14327	10090.ENSMUSP00000021689,10090.ENSMUSP00000023467,10090.ENSMUSP00000034717,10090.ENSMUSP00000050275,10090.ENSMUSP00000068374,10090.ENSMUSP00000099652,10090.ENSMUSP00000099902,10090.ENSMUSP00000109804,10090.ENSMUSP00000109979,10090.ENSMUSP00000124312,10090.ENSMUSP00000125993,10090.ENSMUSP00000140019	Evl,Pak2,Kank2,Gas2l1,Map1b,Tjp1,Sptbn1,Camsap1,Add1,Ssh1,Camsap3,Clasp1
GO:0030036	Actin cytoskeleton organization	19	496	0.76	8.76e-07	6.0575	10090.ENSMUSP00000021689,10090.ENSMUSP00000024709,10090.ENSMUSP00000026436,10090.ENSMUSP00000027888,10090.ENSMUSP00000031695,10090.ENSMUSP00000033030,10090.ENSMUSP00000039707,10090.ENSMUSP00000050275,10090.ENSMUSP00000055122,10090.ENSMUSP00000075167,10090.ENSMUSP00000099652,10090.ENSMUSP00000104322,10090.ENSMUSP00000106746,10090.ENSMUSP00000108300,10090.ENSMUSP00000109979,10090.ENSMUSP00000116494…	Evl,Cd2ap,Baiap2,Abl2,Wasl,Parva,Micall2,Gas2l1,Epb4.1l2,Abl1,Tjp1,Gas7,Cdc42bpa,Epb4.1l3,Add1,Mapkap1,Abi1,Ssh1,Tnik
GO:0050896	Response to stimulus	81	6908	0.25	1.39e-06	5.85699	10090.ENSMUSP00000000369,10090.ENSMUSP00000004622,10090.ENSMUSP00000006037,10090.ENSMUSP00000009699,10090.ENSMUSP00000013886,10090.ENSMUSP00000020188,10090.ENSMUSP00000021689,10090.ENSMUSP00000023467,10090.ENSMUSP00000023487,10090.ENSMUSP00000023538,10090.ENSMUSP00000023741,10090.ENSMUSP00000024958,10090.ENSMUSP00000026436,10090.ENSMUSP00000027517,10090.ENSMUSP00000027888,10090.ENSMUSP00000028062…	Rem1,Gab2,Ncoa2,Cdk9,Ppp1r12c,Ifngr1,Evl,Pak2,Arhgap31,Mylk,Kmt2d,Caskin1,Baiap2,Dgkd,Abl2,Vim,Itgav,Bcar3,Dock7,Wasl,Itpr1,Sema4b,Parva,Lamtor1,Bag3,Rbm3,Pak4,Spag9,Kif16b,Rcsd1,Dok3,Gas2l1,Rasd1,Ctnnd1,Arhgap20,Map1b,Abcd2,Ppp1r12a,Abl1,Dapk1,Tfe3,Ablim1,Dab2,Dennd4c,Uri1,Pkd2,Chd8,Trio,Nefh,Tjp2,Fyn,Tjp1,Vdac1,Sptbn1,Slc30a2,Jun,Frmpd1,Mavs,Oxr1,Cdc42bpa,Tnks1bp1,Pak3,Rasgrp2,Itsn1,Add1,Kalrn,…
GO:0048523	Negative regulation of cellular process	63	4672	0.31	1.84e-06	5.73518	10090.ENSMUSP00000000369,10090.ENSMUSP00000006037,10090.ENSMUSP00000009699,10090.ENSMUSP00000021689,10090.ENSMUSP00000022793,10090.ENSMUSP00000023467,10090.ENSMUSP00000023741,10090.ENSMUSP00000024709,10090.ENSMUSP00000025751,10090.ENSMUSP00000027131,10090.ENSMUSP00000027888,10090.ENSMUSP00000028062,10090.ENSMUSP00000028499,10090.ENSMUSP00000031695,10090.ENSMUSP00000032192,10090.ENSMUSP00000032754…	Rem1,Ncoa2,Cdk9,Evl,Acin1,Pak2,Kmt2d,Cd2ap,Ighmbp2,Slc39a10,Abl2,Vim,Itgav,Wasl,Itpr1,Sema4b,Bag3,Kank2,Map4,Pak4,Irf2bpl,Ptpn13,Gas2l1,Rasd1,Irf2bp1,Ctnnd1,Cast,Map1b,Abcd2,Abl1,Frmd4a,Dapk1,Dab2,Uri1,Pkd2,Chd8,Trio,Tjp2,Fyn,Rhbdf2,Tjp1,Vdac1,Sptbn1,Jun,Rreb1,Oxr1,Pbrm1,Itsn1,Camsap1,Add1,Kalrn,Cbx5,Whsc1l1,Fam129a,Mapkap1,Ssh1,Pag1,Camsap3,Zfp219,Mef2c,Wnk3,Rhox5,Clasp1
GO:0045937	Positive regulation of phosphate metabolic process	28	1159	0.56	2.01e-06	5.6968	10090.ENSMUSP00000009699,10090.ENSMUSP00000023467,10090.ENSMUSP00000027131,10090.ENSMUSP00000027888,10090.ENSMUSP00000029766,10090.ENSMUSP00000030286,10090.ENSMUSP00000033131,10090.ENSMUSP00000038613,10090.ENSMUSP00000040486,10090.ENSMUSP00000042271,10090.ENSMUSP00000064518,10090.ENSMUSP00000069257,10090.ENSMUSP00000075167,10090.ENSMUSP00000079689,10090.ENSMUSP00000084041,10090.ENSMUSP00000097547…	Cdk9,Pak2,Slc39a10,Abl2,Bcar3,Dock7,Lamtor1,Jcad,Pak4,Spag9,Ctnnd1,Ppp1r12a,Abl1,Dab2,Pkd2,Fyn,Jun,Mavs,Tnks1bp1,Pak3,Itsn1,Fam129a,Mapkap1,Abi1,Tnik,Tiam1,Mef2c,Wnk3
GO:0022603	Regulation of anatomical structure morphogenesis	27	1090	0.57	2.25e-06	5.64782	10090.ENSMUSP00000026436,10090.ENSMUSP00000027888,10090.ENSMUSP00000028062,10090.ENSMUSP00000029708,10090.ENSMUSP00000031695,10090.ENSMUSP00000032192,10090.ENSMUSP00000032754,10090.ENSMUSP00000033030,10090.ENSMUSP00000038613,10090.ENSMUSP00000040486,10090.ENSMUSP00000055122,10090.ENSMUSP00000068374,10090.ENSMUSP00000075167,10090.ENSMUSP00000079689,10090.ENSMUSP00000097547,10090.ENSMUSP00000099652…	Baiap2,Abl2,Vim,Apoa1bp,Wasl,Itpr1,Sema4b,Parva,Jcad,Pak4,Epb4.1l2,Map1b,Abl1,Dab2,Fyn,Tjp1,Gas7,Rreb1,Epb4.1l3,Pak3,Camsap1,Add1,Kalrn,Tnik,Tiam1,Mef2c,Clasp1
GO:0048812	Neuron projection morphogenesis	18	479	0.75	2.64e-06	5.5784	10090.ENSMUSP00000021689,10090.ENSMUSP00000027888,10090.ENSMUSP00000030286,10090.ENSMUSP00000031695,10090.ENSMUSP00000032754,10090.ENSMUSP00000068374,10090.ENSMUSP00000075167,10090.ENSMUSP00000078336,10090.ENSMUSP00000087714,10090.ENSMUSP00000091061,10090.ENSMUSP00000097547,10090.ENSMUSP00000104322,10090.ENSMUSP00000108300,10090.ENSMUSP00000108485,10090.ENSMUSP00000110611,10090.ENSMUSP00000118491…	Evl,Abl2,Dock7,Wasl,Sema4b,Map1b,Abl1,Ablim1,Trio,Nefh,Fyn,Gas7,Epb4.1l3,Pak3,Kalrn,Abi1,Tnik,Tiam1
GO:0006996	Organelle organization	48	3066	0.37	3.21e-06	5.49349	10090.ENSMUSP00000021689,10090.ENSMUSP00000022793,10090.ENSMUSP00000023741,10090.ENSMUSP00000024709,10090.ENSMUSP00000024854,10090.ENSMUSP00000025751,10090.ENSMUSP00000026436,10090.ENSMUSP00000027888,10090.ENSMUSP00000028062,10090.ENSMUSP00000030286,10090.ENSMUSP00000031695,10090.ENSMUSP00000033030,10090.ENSMUSP00000033131,10090.ENSMUSP00000033136,10090.ENSMUSP00000035055,10090.ENSMUSP00000036065…	Evl,Acin1,Kmt2d,Cd2ap,Clip4,Ighmbp2,Baiap2,Abl2,Vim,Dock7,Wasl,Parva,Lamtor1,Bag3,Map4,Reep2,Micall2,Syne2,Gas2l1,Epb4.1l2,Map1b,Ppp1r12a,Pard3b,Abl1,Ablim1,Pkd2,Smarca1,Chd8,Nefh,Tjp1,Sptbn1,Jun,Gas7,Cdc42bpa,Pbrm1,Epb4.1l3,Camsap1,Add1,Arid1b,Map7,Whsc1l1,Mapkap1,Abi1,Ssh1,Tnik,Camsap3,Pnpla2,Clasp1
GO:0048869	Cellular developmental process	54	3731	0.34	3.58e-06	5.44612	10090.ENSMUSP00000001279,10090.ENSMUSP00000004622,10090.ENSMUSP00000020188,10090.ENSMUSP00000020315,10090.ENSMUSP00000021689,10090.ENSMUSP00000022793,10090.ENSMUSP00000023467,10090.ENSMUSP00000023741,10090.ENSMUSP00000025751,10090.ENSMUSP00000026436,10090.ENSMUSP00000027888,10090.ENSMUSP00000028062,10090.ENSMUSP00000028499,10090.ENSMUSP00000030286,10090.ENSMUSP00000031695,10090.ENSMUSP00000032192…	Lsr,Gab2,Ifngr1,Cand1,Evl,Acin1,Pak2,Kmt2d,Ighmbp2,Baiap2,Abl2,Vim,Itgav,Dock7,Wasl,Itpr1,Sema4b,Parva,Map4,Micall2,Pak4,Spag9,Syne2,Ctnnd1,Map1b,Abl1,Ablim1,Dab2,Smarca1,Trio,Nefh,Tjp2,Fyn,Tjp1,Vdac1,Jun,Gas7,Pbrm1,Epb4.1l3,Pak3,Itsn1,Camsap1,Add1,Kalrn,Arid1b,Map7,Abi1,Tnik,Camsap3,Tiam1,Zfp219,Myo9b,Mef2c,Rhox5
GO:0030154	Cell differentiation	53	3674	0.34	5.83e-06	5.23433	10090.ENSMUSP00000001279,10090.ENSMUSP00000004622,10090.ENSMUSP00000020188,10090.ENSMUSP00000020315,10090.ENSMUSP00000021689,10090.ENSMUSP00000022793,10090.ENSMUSP00000023467,10090.ENSMUSP00000023741,10090.ENSMUSP00000025751,10090.ENSMUSP00000026436,10090.ENSMUSP00000027888,10090.ENSMUSP00000028062,10090.ENSMUSP00000028499,10090.ENSMUSP00000030286,10090.ENSMUSP00000031695,10090.ENSMUSP00000032192…	Lsr,Gab2,Ifngr1,Cand1,Evl,Acin1,Pak2,Kmt2d,Ighmbp2,Baiap2,Abl2,Vim,Itgav,Dock7,Wasl,Itpr1,Sema4b,Parva,Map4,Micall2,Pak4,Spag9,Syne2,Ctnnd1,Map1b,Abl1,Ablim1,Dab2,Smarca1,Trio,Nefh,Tjp2,Fyn,Tjp1,Vdac1,Jun,Gas7,Pbrm1,Epb4.1l3,Pak3,Itsn1,Camsap1,Add1,Kalrn,Arid1b,Map7,Abi1,Tnik,Camsap3,Tiam1,Zfp219,Mef2c,Rhox5
GO:0000904	Cell morphogenesis involved in differentiation	19	575	0.7	6.5e-06	5.18709	10090.ENSMUSP00000021689,10090.ENSMUSP00000027888,10090.ENSMUSP00000028499,10090.ENSMUSP00000030286,10090.ENSMUSP00000031695,10090.ENSMUSP00000032754,10090.ENSMUSP00000033030,10090.ENSMUSP00000039707,10090.ENSMUSP00000068374,10090.ENSMUSP00000075167,10090.ENSMUSP00000078336,10090.ENSMUSP00000079689,10090.ENSMUSP00000087714,10090.ENSMUSP00000091061,10090.ENSMUSP00000097547,10090.ENSMUSP00000108485…	Evl,Abl2,Itgav,Dock7,Wasl,Sema4b,Parva,Micall2,Map1b,Abl1,Ablim1,Dab2,Trio,Nefh,Fyn,Pak3,Kalrn,Abi1,Mef2c
GO:0031401	Positive regulation of protein modification process	28	1243	0.53	7.16e-06	5.14509	10090.ENSMUSP00000009699,10090.ENSMUSP00000023467,10090.ENSMUSP00000027131,10090.ENSMUSP00000027888,10090.ENSMUSP00000029766,10090.ENSMUSP00000030286,10090.ENSMUSP00000033131,10090.ENSMUSP00000038613,10090.ENSMUSP00000040486,10090.ENSMUSP00000042271,10090.ENSMUSP00000064518,10090.ENSMUSP00000069257,10090.ENSMUSP00000075167,10090.ENSMUSP00000079689,10090.ENSMUSP00000084041,10090.ENSMUSP00000097547…	Cdk9,Pak2,Slc39a10,Abl2,Bcar3,Dock7,Lamtor1,Jcad,Pak4,Spag9,Ctnnd1,Ppp1r12a,Abl1,Dab2,Pkd2,Fyn,Jun,Mavs,Tnks1bp1,Pak3,Whsc1l1,Fam129a,Mapkap1,Abi1,Tnik,Tiam1,Mef2c,Wnk3
GO:0042327	Positive regulation of phosphorylation	26	1085	0.56	7.35e-06	5.13371	10090.ENSMUSP00000009699,10090.ENSMUSP00000023467,10090.ENSMUSP00000027888,10090.ENSMUSP00000029766,10090.ENSMUSP00000030286,10090.ENSMUSP00000033131,10090.ENSMUSP00000038613,10090.ENSMUSP00000040486,10090.ENSMUSP00000042271,10090.ENSMUSP00000064518,10090.ENSMUSP00000075167,10090.ENSMUSP00000079689,10090.ENSMUSP00000084041,10090.ENSMUSP00000097547,10090.ENSMUSP00000102711,10090.ENSMUSP00000105828…	Cdk9,Pak2,Abl2,Bcar3,Dock7,Lamtor1,Jcad,Pak4,Spag9,Ctnnd1,Abl1,Dab2,Pkd2,Fyn,Jun,Mavs,Tnks1bp1,Pak3,Itsn1,Fam129a,Mapkap1,Abi1,Tnik,Tiam1,Mef2c,Wnk3
GO:0001934	Positive regulation of protein phosphorylation	25	1010	0.57	7.48e-06	5.1261	10090.ENSMUSP00000009699,10090.ENSMUSP00000023467,10090.ENSMUSP00000027888,10090.ENSMUSP00000029766,10090.ENSMUSP00000030286,10090.ENSMUSP00000033131,10090.ENSMUSP00000038613,10090.ENSMUSP00000040486,10090.ENSMUSP00000042271,10090.ENSMUSP00000064518,10090.ENSMUSP00000075167,10090.ENSMUSP00000079689,10090.ENSMUSP00000084041,10090.ENSMUSP00000097547,10090.ENSMUSP00000102711,10090.ENSMUSP00000105828…	Cdk9,Pak2,Abl2,Bcar3,Dock7,Lamtor1,Jcad,Pak4,Spag9,Ctnnd1,Abl1,Dab2,Pkd2,Fyn,Jun,Mavs,Tnks1bp1,Pak3,Fam129a,Mapkap1,Abi1,Tnik,Tiam1,Mef2c,Wnk3
GO:0051128	Regulation of cellular component organization	41	2438	0.4	7.48e-06	5.1261	10090.ENSMUSP00000009699,10090.ENSMUSP00000020315,10090.ENSMUSP00000021689,10090.ENSMUSP00000023467,10090.ENSMUSP00000024709,10090.ENSMUSP00000026436,10090.ENSMUSP00000027888,10090.ENSMUSP00000028062,10090.ENSMUSP00000031695,10090.ENSMUSP00000032192,10090.ENSMUSP00000032754,10090.ENSMUSP00000033131,10090.ENSMUSP00000033136,10090.ENSMUSP00000034717,10090.ENSMUSP00000035055,10090.ENSMUSP00000047697…	Cdk9,Cand1,Evl,Pak2,Cd2ap,Baiap2,Abl2,Vim,Wasl,Itpr1,Sema4b,Lamtor1,Bag3,Kank2,Map4,Syne2,Gas2l1,Map1b,Abl1,Dab2,Uri1,Sept9,Fyn,Tjp1,Vdac1,Sptbn1,Mavs,Rreb1,Epb4.1l3,Pak3,Itsn1,Camsap1,Add1,Kalrn,Whsc1l1,Ssh1,Tnik,Camsap3,Tiam1,Mef2c,Clasp1
GO:0048856	Anatomical structure development	66	5258	0.27	8e-06	5.09691	10090.ENSMUSP00000001279,10090.ENSMUSP00000004622,10090.ENSMUSP00000020188,10090.ENSMUSP00000020695,10090.ENSMUSP00000021689,10090.ENSMUSP00000022793,10090.ENSMUSP00000023467,10090.ENSMUSP00000023538,10090.ENSMUSP00000023741,10090.ENSMUSP00000025751,10090.ENSMUSP00000026436,10090.ENSMUSP00000027888,10090.ENSMUSP00000028062,10090.ENSMUSP00000028499,10090.ENSMUSP00000029708,10090.ENSMUSP00000029766…	Lsr,Gab2,Ifngr1,Tns3,Evl,Acin1,Pak2,Mylk,Kmt2d,Ighmbp2,Baiap2,Abl2,Vim,Itgav,Apoa1bp,Bcar3,Dock7,Wasl,Itpr1,Sema4b,Parva,Bag3,Kank2,Map4,Micall2,Pak4,Irf2bpl,Spag9,Kif16b,Syne2,Ctnnd1,Map1b,Abcd2,Abl1,Ablim1,Dab2,Pkd2,Smarca1,Chd8,Sybu,Trio,Nefh,Tjp2,Fyn,Tjp1,Vdac1,Jun,Gas7,Pbrm1,Epb4.1l3,Pak3,Itsn1,Camsap1,Add1,Kalrn,Arid1b,Map7,Abi1,Ssh1,Tnik,Camsap3,Tiam1,Zfp219,Myo9b,Mef2c,Rhox5
GO:0022604	Regulation of cell morphogenesis	18	528	0.71	8.84e-06	5.05355	10090.ENSMUSP00000026436,10090.ENSMUSP00000028062,10090.ENSMUSP00000031695,10090.ENSMUSP00000032754,10090.ENSMUSP00000033030,10090.ENSMUSP00000055122,10090.ENSMUSP00000068374,10090.ENSMUSP00000075167,10090.ENSMUSP00000079689,10090.ENSMUSP00000097547,10090.ENSMUSP00000104322,10090.ENSMUSP00000105867,10090.ENSMUSP00000108300,10090.ENSMUSP00000108485,10090.ENSMUSP00000109804,10090.ENSMUSP00000110611…	Baiap2,Vim,Wasl,Sema4b,Parva,Epb4.1l2,Map1b,Abl1,Dab2,Fyn,Gas7,Rreb1,Epb4.1l3,Pak3,Camsap1,Kalrn,Tnik,Tiam1
GO:0097435	Supramolecular fiber organization	17	469	0.74	9.26e-06	5.03339	10090.ENSMUSP00000021689,10090.ENSMUSP00000024709,10090.ENSMUSP00000024854,10090.ENSMUSP00000026436,10090.ENSMUSP00000027888,10090.ENSMUSP00000028062,10090.ENSMUSP00000031695,10090.ENSMUSP00000039707,10090.ENSMUSP00000050275,10090.ENSMUSP00000075167,10090.ENSMUSP00000091061,10090.ENSMUSP00000104322,10090.ENSMUSP00000109804,10090.ENSMUSP00000109979,10090.ENSMUSP00000118491,10090.ENSMUSP00000125993…	Evl,Cd2ap,Clip4,Baiap2,Abl2,Vim,Wasl,Micall2,Gas2l1,Abl1,Nefh,Gas7,Camsap1,Add1,Abi1,Camsap3,Clasp1
GO:0031325	Positive regulation of cellular metabolic process	49	3320	0.35	1.09e-05	4.96257	10090.ENSMUSP00000006037,10090.ENSMUSP00000009699,10090.ENSMUSP00000020188,10090.ENSMUSP00000020315,10090.ENSMUSP00000023467,10090.ENSMUSP00000023741,10090.ENSMUSP00000027131,10090.ENSMUSP00000027888,10090.ENSMUSP00000028062,10090.ENSMUSP00000029766,10090.ENSMUSP00000030286,10090.ENSMUSP00000031695,10090.ENSMUSP00000033131,10090.ENSMUSP00000033136,10090.ENSMUSP00000038613,10090.ENSMUSP00000038964…	Ncoa2,Cdk9,Ifngr1,Cand1,Pak2,Kmt2d,Slc39a10,Abl2,Vim,Bcar3,Dock7,Wasl,Lamtor1,Bag3,Jcad,Rbm3,Pak4,Irf2bpl,Spag9,Ctnnd1,Abcd2,Ppp1r12a,Abl1,Dapk1,Tfe3,Ablim1,Dab2,Pkd2,Smarca1,Chd8,Fyn,Jun,Mavs,Rreb1,Tnks1bp1,Pbrm1,Pak3,Itsn1,Arid1b,Whsc1l1,Fam129a,Mapkap1,Abi1,Tnik,Tiam1,Zfp219,Pnpla2,Mef2c,Wnk3
GO:0051493	Regulation of cytoskeleton organization	18	541	0.7	1.19e-05	4.92445	10090.ENSMUSP00000021689,10090.ENSMUSP00000023467,10090.ENSMUSP00000024709,10090.ENSMUSP00000026436,10090.ENSMUSP00000031695,10090.ENSMUSP00000034717,10090.ENSMUSP00000050275,10090.ENSMUSP00000068374,10090.ENSMUSP00000075167,10090.ENSMUSP00000099652,10090.ENSMUSP00000099902,10090.ENSMUSP00000108485,10090.ENSMUSP00000109804,10090.ENSMUSP00000109979,10090.ENSMUSP00000124312,10090.ENSMUSP00000125993…	Evl,Pak2,Cd2ap,Baiap2,Wasl,Kank2,Gas2l1,Map1b,Abl1,Tjp1,Sptbn1,Pak3,Camsap1,Add1,Ssh1,Camsap3,Mef2c,Clasp1
GO:0034330	Cell junction organization	17	481	0.72	1.24e-05	4.90658	10090.ENSMUSP00000001279,10090.ENSMUSP00000023467,10090.ENSMUSP00000026436,10090.ENSMUSP00000027888,10090.ENSMUSP00000028499,10090.ENSMUSP00000031695,10090.ENSMUSP00000039707,10090.ENSMUSP00000064518,10090.ENSMUSP00000068374,10090.ENSMUSP00000087511,10090.ENSMUSP00000091061,10090.ENSMUSP00000099652,10090.ENSMUSP00000107250,10090.ENSMUSP00000108300,10090.ENSMUSP00000108485,10090.ENSMUSP00000110611…	Lsr,Pak2,Baiap2,Abl2,Itgav,Wasl,Micall2,Ctnnd1,Map1b,Sybu,Nefh,Tjp1,Ppfibp1,Epb4.1l3,Pak3,Kalrn,Camsap3
GO:0016358	Dendrite development	10	135	1.05	1.52e-05	4.81816	10090.ENSMUSP00000023467,10090.ENSMUSP00000026436,10090.ENSMUSP00000027888,10090.ENSMUSP00000031695,10090.ENSMUSP00000040486,10090.ENSMUSP00000068374,10090.ENSMUSP00000097547,10090.ENSMUSP00000108485,10090.ENSMUSP00000111463,10090.ENSMUSP00000118491	Pak2,Baiap2,Abl2,Wasl,Pak4,Map1b,Fyn,Pak3,Arid1b,Abi1
GO:1901880	Negative regulation of protein depolymerization	8	70	1.23	1.57e-05	4.8041	10090.ENSMUSP00000021689,10090.ENSMUSP00000050275,10090.ENSMUSP00000068374,10090.ENSMUSP00000099902,10090.ENSMUSP00000109804,10090.ENSMUSP00000109979,10090.ENSMUSP00000125993,10090.ENSMUSP00000140019	Evl,Gas2l1,Map1b,Sptbn1,Camsap1,Add1,Camsap3,Clasp1
GO:0009653	Anatomical structure morphogenesis	38	2244	0.4	1.97e-05	4.70553	10090.ENSMUSP00000021689,10090.ENSMUSP00000023538,10090.ENSMUSP00000027888,10090.ENSMUSP00000028499,10090.ENSMUSP00000029708,10090.ENSMUSP00000029766,10090.ENSMUSP00000030286,10090.ENSMUSP00000031695,10090.ENSMUSP00000032754,10090.ENSMUSP00000033030,10090.ENSMUSP00000039707,10090.ENSMUSP00000042551,10090.ENSMUSP00000064518,10090.ENSMUSP00000068374,10090.ENSMUSP00000075167,10090.ENSMUSP00000078336…	Evl,Mylk,Abl2,Itgav,Apoa1bp,Bcar3,Dock7,Wasl,Sema4b,Parva,Micall2,Kif16b,Ctnnd1,Map1b,Abl1,Ablim1,Dab2,Pkd2,Trio,Nefh,Fyn,Tjp1,Jun,Gas7,Pbrm1,Epb4.1l3,Pak3,Add1,Kalrn,Map7,Abi1,Ssh1,Tnik,Camsap3,Tiam1,Zfp219,Myo9b,Mef2c
GO:0051247	Positive regulation of protein metabolic process	32	1675	0.46	1.97e-05	4.70553	10090.ENSMUSP00000009699,10090.ENSMUSP00000020188,10090.ENSMUSP00000023467,10090.ENSMUSP00000027131,10090.ENSMUSP00000027888,10090.ENSMUSP00000028062,10090.ENSMUSP00000029766,10090.ENSMUSP00000030286,10090.ENSMUSP00000033131,10090.ENSMUSP00000038613,10090.ENSMUSP00000038964,10090.ENSMUSP00000040486,10090.ENSMUSP00000042271,10090.ENSMUSP00000064518,10090.ENSMUSP00000069257,10090.ENSMUSP00000075167…	Cdk9,Ifngr1,Pak2,Slc39a10,Abl2,Vim,Bcar3,Dock7,Lamtor1,Jcad,Rbm3,Pak4,Spag9,Ctnnd1,Ppp1r12a,Abl1,Dapk1,Dab2,Pkd2,Fyn,Jun,Mavs,Tnks1bp1,Pak3,Whsc1l1,Fam129a,Mapkap1,Abi1,Tnik,Tiam1,Mef2c,Wnk3
GO:0060341	Regulation of cellular localization	25	1083	0.54	2.2e-05	4.65758	10090.ENSMUSP00000004622,10090.ENSMUSP00000024709,10090.ENSMUSP00000028499,10090.ENSMUSP00000032192,10090.ENSMUSP00000033136,10090.ENSMUSP00000036065,10090.ENSMUSP00000055122,10090.ENSMUSP00000068374,10090.ENSMUSP00000069257,10090.ENSMUSP00000075167,10090.ENSMUSP00000079689,10090.ENSMUSP00000084041,10090.ENSMUSP00000087511,10090.ENSMUSP00000091061,10090.ENSMUSP00000097547,10090.ENSMUSP00000099902…	Gab2,Cd2ap,Itgav,Itpr1,Bag3,Reep2,Epb4.1l2,Map1b,Ppp1r12a,Abl1,Dab2,Pkd2,Sybu,Nefh,Fyn,Sptbn1,Slc30a2,Mavs,Kalrn,Hnrnpm,Ssh1,Tnik,Tiam1,Mef2c,Wnk3
GO:0032270	Positive regulation of cellular protein metabolic process	31	1600	0.46	2.32e-05	4.63451	10090.ENSMUSP00000009699,10090.ENSMUSP00000023467,10090.ENSMUSP00000027131,10090.ENSMUSP00000027888,10090.ENSMUSP00000028062,10090.ENSMUSP00000029766,10090.ENSMUSP00000030286,10090.ENSMUSP00000033131,10090.ENSMUSP00000038613,10090.ENSMUSP00000038964,10090.ENSMUSP00000040486,10090.ENSMUSP00000042271,10090.ENSMUSP00000064518,10090.ENSMUSP00000069257,10090.ENSMUSP00000075167,10090.ENSMUSP00000076666…	Cdk9,Pak2,Slc39a10,Abl2,Vim,Bcar3,Dock7,Lamtor1,Jcad,Rbm3,Pak4,Spag9,Ctnnd1,Ppp1r12a,Abl1,Dapk1,Dab2,Pkd2,Fyn,Jun,Mavs,Tnks1bp1,Pak3,Whsc1l1,Fam129a,Mapkap1,Abi1,Tnik,Tiam1,Mef2c,Wnk3
GO:0006468	Protein phosphorylation	21	785	0.6	2.52e-05	4.5986	10090.ENSMUSP00000009699,10090.ENSMUSP00000023467,10090.ENSMUSP00000023538,10090.ENSMUSP00000027888,10090.ENSMUSP00000028499,10090.ENSMUSP00000040486,10090.ENSMUSP00000042271,10090.ENSMUSP00000050788,10090.ENSMUSP00000075167,10090.ENSMUSP00000076666,10090.ENSMUSP00000079689,10090.ENSMUSP00000087714,10090.ENSMUSP00000097547,10090.ENSMUSP00000099902,10090.ENSMUSP00000106746,10090.ENSMUSP00000108485…	Cdk9,Pak2,Mylk,Abl2,Itgav,Pak4,Spag9,Phkb,Abl1,Dapk1,Dab2,Trio,Fyn,Sptbn1,Cdc42bpa,Pak3,Kalrn,Abi1,Tnik,Mef2c,Wnk3
GO:0019222	Regulation of metabolic process	71	6085	0.24	2.55e-05	4.59346	10090.ENSMUSP00000001279,10090.ENSMUSP00000006037,10090.ENSMUSP00000009699,10090.ENSMUSP00000020188,10090.ENSMUSP00000020315,10090.ENSMUSP00000022793,10090.ENSMUSP00000023467,10090.ENSMUSP00000023741,10090.ENSMUSP00000024709,10090.ENSMUSP00000025751,10090.ENSMUSP00000027131,10090.ENSMUSP00000027888,10090.ENSMUSP00000028062,10090.ENSMUSP00000028499,10090.ENSMUSP00000029766,10090.ENSMUSP00000030286…	Lsr,Ncoa2,Cdk9,Ifngr1,Cand1,Acin1,Pak2,Kmt2d,Cd2ap,Ighmbp2,Slc39a10,Abl2,Vim,Itgav,Bcar3,Dock7,Wasl,Lamtor1,Bag3,Kank2,Jcad,Rbm3,Pak4,Irf2bpl,Spag9,Kif16b,Ptpn13,Gas2l1,Rasd1,Irf2bp1,Ctnnd1,Cast,Abcd2,Ppp1r12a,Helz,Abl1,Dapk1,Tfe3,Ablim1,Dab2,Uri1,Pkd2,Smarca1,Chd8,Fyn,Vdac1,Sptbn1,Jun,Mavs,Rreb1,Oxr1,Tnks1bp1,Pbrm1,Pak3,Itsn1,Arid1b,Cbx5,Whsc1l1,Fam129a,Mapkap1,Abi1,Hnrnpm,Ssh1,Tnik,Camsap3,Tiam…
GO:0048731	System development	57	4350	0.29	2.55e-05	4.59346	10090.ENSMUSP00000001279,10090.ENSMUSP00000004622,10090.ENSMUSP00000020188,10090.ENSMUSP00000020695,10090.ENSMUSP00000021689,10090.ENSMUSP00000022793,10090.ENSMUSP00000023467,10090.ENSMUSP00000023538,10090.ENSMUSP00000025751,10090.ENSMUSP00000026436,10090.ENSMUSP00000027888,10090.ENSMUSP00000028062,10090.ENSMUSP00000028499,10090.ENSMUSP00000029708,10090.ENSMUSP00000029766,10090.ENSMUSP00000030286…	Lsr,Gab2,Ifngr1,Tns3,Evl,Acin1,Pak2,Mylk,Ighmbp2,Baiap2,Abl2,Vim,Itgav,Apoa1bp,Bcar3,Dock7,Wasl,Itpr1,Sema4b,Parva,Bag3,Kank2,Map4,Micall2,Pak4,Irf2bpl,Spag9,Syne2,Ctnnd1,Map1b,Abcd2,Abl1,Ablim1,Dab2,Pkd2,Smarca1,Chd8,Sybu,Trio,Nefh,Fyn,Jun,Gas7,Pbrm1,Epb4.1l3,Pak3,Itsn1,Camsap1,Add1,Kalrn,Arid1b,Map7,Abi1,Tnik,Camsap3,Tiam1,Mef2c
GO:0120035	Regulation of plasma membrane bounded cell projection organization	21	788	0.6	2.55e-05	4.59346	10090.ENSMUSP00000021689,10090.ENSMUSP00000026436,10090.ENSMUSP00000027888,10090.ENSMUSP00000028062,10090.ENSMUSP00000031695,10090.ENSMUSP00000032192,10090.ENSMUSP00000032754,10090.ENSMUSP00000035055,10090.ENSMUSP00000047697,10090.ENSMUSP00000068374,10090.ENSMUSP00000075167,10090.ENSMUSP00000079689,10090.ENSMUSP00000091435,10090.ENSMUSP00000097547,10090.ENSMUSP00000105867,10090.ENSMUSP00000108485…	Evl,Baiap2,Abl2,Vim,Wasl,Itpr1,Sema4b,Map4,Syne2,Map1b,Abl1,Dab2,Sept9,Fyn,Rreb1,Pak3,Itsn1,Kalrn,Tnik,Tiam1,Mef2c
GO:0031323	Regulation of cellular metabolic process	66	5479	0.26	3.03e-05	4.51856	10090.ENSMUSP00000006037,10090.ENSMUSP00000009699,10090.ENSMUSP00000020188,10090.ENSMUSP00000020315,10090.ENSMUSP00000022793,10090.ENSMUSP00000023467,10090.ENSMUSP00000023741,10090.ENSMUSP00000025751,10090.ENSMUSP00000027131,10090.ENSMUSP00000027888,10090.ENSMUSP00000028062,10090.ENSMUSP00000028499,10090.ENSMUSP00000029766,10090.ENSMUSP00000030286,10090.ENSMUSP00000031695,10090.ENSMUSP00000033131…	Ncoa2,Cdk9,Ifngr1,Cand1,Acin1,Pak2,Kmt2d,Ighmbp2,Slc39a10,Abl2,Vim,Itgav,Bcar3,Dock7,Wasl,Lamtor1,Bag3,Kank2,Jcad,Rbm3,Pak4,Irf2bpl,Spag9,Kif16b,Ptpn13,Rasd1,Irf2bp1,Ctnnd1,Cast,Abcd2,Ppp1r12a,Abl1,Dapk1,Tfe3,Ablim1,Dab2,Uri1,Pkd2,Smarca1,Chd8,Fyn,Vdac1,Jun,Mavs,Rreb1,Oxr1,Tnks1bp1,Pbrm1,Pak3,Itsn1,Arid1b,Cbx5,Whsc1l1,Fam129a,Mapkap1,Abi1,Hnrnpm,Ssh1,Tnik,Camsap3,Tiam1,Zfp219,Pnpla2,Mef2c,Wnk3,Rh…
GO:0032956	Regulation of actin cytoskeleton organization	14	344	0.79	3.24e-05	4.48945	10090.ENSMUSP00000021689,10090.ENSMUSP00000023467,10090.ENSMUSP00000024709,10090.ENSMUSP00000026436,10090.ENSMUSP00000031695,10090.ENSMUSP00000034717,10090.ENSMUSP00000075167,10090.ENSMUSP00000099652,10090.ENSMUSP00000099902,10090.ENSMUSP00000108485,10090.ENSMUSP00000109979,10090.ENSMUSP00000124312,10090.ENSMUSP00000132547,10090.ENSMUSP00000140019	Evl,Pak2,Cd2ap,Baiap2,Wasl,Kank2,Abl1,Tjp1,Sptbn1,Pak3,Add1,Ssh1,Mef2c,Clasp1
GO:0032502	Developmental process	67	5629	0.25	3.43e-05	4.46471	10090.ENSMUSP00000001279,10090.ENSMUSP00000004622,10090.ENSMUSP00000020188,10090.ENSMUSP00000020315,10090.ENSMUSP00000020695,10090.ENSMUSP00000021689,10090.ENSMUSP00000022793,10090.ENSMUSP00000023467,10090.ENSMUSP00000023538,10090.ENSMUSP00000023741,10090.ENSMUSP00000025751,10090.ENSMUSP00000026436,10090.ENSMUSP00000027888,10090.ENSMUSP00000028062,10090.ENSMUSP00000028499,10090.ENSMUSP00000029708…	Lsr,Gab2,Ifngr1,Cand1,Tns3,Evl,Acin1,Pak2,Mylk,Kmt2d,Ighmbp2,Baiap2,Abl2,Vim,Itgav,Apoa1bp,Bcar3,Dock7,Wasl,Itpr1,Sema4b,Parva,Bag3,Kank2,Map4,Micall2,Pak4,Irf2bpl,Spag9,Kif16b,Syne2,Ctnnd1,Map1b,Abcd2,Abl1,Ablim1,Dab2,Pkd2,Smarca1,Chd8,Sybu,Trio,Nefh,Tjp2,Fyn,Tjp1,Vdac1,Jun,Gas7,Pbrm1,Epb4.1l3,Pak3,Itsn1,Camsap1,Add1,Kalrn,Arid1b,Map7,Abi1,Ssh1,Tnik,Camsap3,Tiam1,Zfp219,Myo9b,Mef2c,Rhox5
GO:0051179	Localization	59	4646	0.28	3.57e-05	4.44733	10090.ENSMUSP00000001279,10090.ENSMUSP00000004622,10090.ENSMUSP00000020695,10090.ENSMUSP00000024709,10090.ENSMUSP00000026436,10090.ENSMUSP00000027131,10090.ENSMUSP00000027888,10090.ENSMUSP00000028499,10090.ENSMUSP00000029708,10090.ENSMUSP00000030286,10090.ENSMUSP00000030760,10090.ENSMUSP00000031695,10090.ENSMUSP00000032192,10090.ENSMUSP00000032754,10090.ENSMUSP00000033030,10090.ENSMUSP00000033131…	Lsr,Gab2,Tns3,Cd2ap,Baiap2,Slc39a10,Abl2,Itgav,Apoa1bp,Dock7,Necap2,Wasl,Itpr1,Sema4b,Parva,Lamtor1,Heph,Kank2,Map4,Reep2,Micall2,Spag9,Kif16b,Sept14,Syne2,Gas2l1,Plekhf2,Map1b,Abcd2,Pard3b,Abl1,Dab2,Dennd4c,Pkd2,Sybu,Sept9,Tjp2,Fyn,Reps2,Rhbdf2,Tjp1,Vdac1,Sptbn1,Slc30a2,Frmpd1,Cdc42bpa,Epb4.1l3,Itsn1,Kalrn,Map7,Tnik,Camsap3,Tiam1,Pnpla2,Myo9b,Mef2c,Wnk3,Rhox5,Clasp1
GO:0007154	Cell communication	55	4179	0.3	3.76e-05	4.42481	10090.ENSMUSP00000000369,10090.ENSMUSP00000004622,10090.ENSMUSP00000013886,10090.ENSMUSP00000020188,10090.ENSMUSP00000023467,10090.ENSMUSP00000023487,10090.ENSMUSP00000024958,10090.ENSMUSP00000026436,10090.ENSMUSP00000027517,10090.ENSMUSP00000027888,10090.ENSMUSP00000028062,10090.ENSMUSP00000028499,10090.ENSMUSP00000029766,10090.ENSMUSP00000030286,10090.ENSMUSP00000032192,10090.ENSMUSP00000032754…	Rem1,Gab2,Ppp1r12c,Ifngr1,Pak2,Arhgap31,Caskin1,Baiap2,Dgkd,Abl2,Vim,Itgav,Bcar3,Dock7,Itpr1,Sema4b,Bag3,Pak4,Spag9,Kif16b,Dok3,Gas2l1,Rasd1,Ctnnd1,Arhgap20,Ppp1r12a,Abl1,Dapk1,Dab2,Pkd2,Chd8,Tjp2,Fyn,Vdac1,Sptbn1,Jun,Frmpd1,Mavs,Cdc42bpa,Pak3,Rasgrp2,Itsn1,Kalrn,Arid1b,Mapkap1,Abi1,Ssh1,Pag1,Tnik,Tiam1,Myo9b,Ppp1r12b,Mef2c,Arhgap32,Wnk3
GO:0023052	Signaling	54	4065	0.3	3.8e-05	4.42022	10090.ENSMUSP00000000369,10090.ENSMUSP00000004622,10090.ENSMUSP00000013886,10090.ENSMUSP00000020188,10090.ENSMUSP00000023467,10090.ENSMUSP00000023487,10090.ENSMUSP00000024958,10090.ENSMUSP00000026436,10090.ENSMUSP00000027517,10090.ENSMUSP00000027888,10090.ENSMUSP00000028062,10090.ENSMUSP00000028499,10090.ENSMUSP00000029766,10090.ENSMUSP00000030286,10090.ENSMUSP00000032192,10090.ENSMUSP00000032754…	Rem1,Gab2,Ppp1r12c,Ifngr1,Pak2,Arhgap31,Caskin1,Baiap2,Dgkd,Abl2,Vim,Itgav,Bcar3,Dock7,Itpr1,Sema4b,Bag3,Pak4,Spag9,Kif16b,Dok3,Rasd1,Ctnnd1,Arhgap20,Ppp1r12a,Abl1,Dapk1,Dab2,Pkd2,Chd8,Tjp2,Fyn,Vdac1,Sptbn1,Jun,Frmpd1,Mavs,Cdc42bpa,Pak3,Rasgrp2,Itsn1,Kalrn,Arid1b,Mapkap1,Abi1,Ssh1,Pag1,Tnik,Tiam1,Myo9b,Ppp1r12b,Mef2c,Arhgap32,Wnk3
GO:0007163	Establishment or maintenance of cell polarity	11	199	0.92	3.97e-05	4.40121	10090.ENSMUSP00000030286,10090.ENSMUSP00000033030,10090.ENSMUSP00000035055,10090.ENSMUSP00000047697,10090.ENSMUSP00000068374,10090.ENSMUSP00000074837,10090.ENSMUSP00000075172,10090.ENSMUSP00000116494,10090.ENSMUSP00000125993,10090.ENSMUSP00000129220,10090.ENSMUSP00000140019	Dock7,Parva,Map4,Syne2,Map1b,Pard3b,Frmd4a,Mapkap1,Camsap3,Myo9b,Clasp1
GO:0070887	Cellular response to chemical stimulus	40	2535	0.37	4e-05	4.39794	10090.ENSMUSP00000006037,10090.ENSMUSP00000009699,10090.ENSMUSP00000020188,10090.ENSMUSP00000021689,10090.ENSMUSP00000023467,10090.ENSMUSP00000023538,10090.ENSMUSP00000026436,10090.ENSMUSP00000027888,10090.ENSMUSP00000028062,10090.ENSMUSP00000029766,10090.ENSMUSP00000032192,10090.ENSMUSP00000033030,10090.ENSMUSP00000033131,10090.ENSMUSP00000033136,10090.ENSMUSP00000040486,10090.ENSMUSP00000042551…	Ncoa2,Cdk9,Ifngr1,Evl,Pak2,Mylk,Baiap2,Abl2,Vim,Bcar3,Itpr1,Parva,Lamtor1,Bag3,Pak4,Kif16b,Rcsd1,Gas2l1,Map1b,Ppp1r12a,Abl1,Dapk1,Dab2,Dennd4c,Uri1,Pkd2,Nefh,Tjp2,Fyn,Tjp1,Jun,Mavs,Oxr1,Pak3,Rasgrp2,Add1,Ssh1,Myo9b,Mef2c,Wnk3
GO:0007275	Multicellular organism development	61	4921	0.27	4.24e-05	4.37263	10090.ENSMUSP00000001279,10090.ENSMUSP00000004622,10090.ENSMUSP00000020188,10090.ENSMUSP00000020695,10090.ENSMUSP00000021689,10090.ENSMUSP00000022793,10090.ENSMUSP00000023467,10090.ENSMUSP00000023538,10090.ENSMUSP00000023741,10090.ENSMUSP00000025751,10090.ENSMUSP00000026436,10090.ENSMUSP00000027888,10090.ENSMUSP00000028062,10090.ENSMUSP00000028499,10090.ENSMUSP00000029708,10090.ENSMUSP00000029766…	Lsr,Gab2,Ifngr1,Tns3,Evl,Acin1,Pak2,Mylk,Kmt2d,Ighmbp2,Baiap2,Abl2,Vim,Itgav,Apoa1bp,Bcar3,Dock7,Wasl,Itpr1,Sema4b,Parva,Bag3,Kank2,Map4,Micall2,Pak4,Irf2bpl,Spag9,Kif16b,Syne2,Ctnnd1,Map1b,Abcd2,Abl1,Ablim1,Dab2,Pkd2,Smarca1,Chd8,Sybu,Trio,Nefh,Fyn,Tjp1,Jun,Gas7,Pbrm1,Epb4.1l3,Pak3,Itsn1,Camsap1,Add1,Kalrn,Arid1b,Map7,Abi1,Tnik,Camsap3,Tiam1,Zfp219,Mef2c
GO:0030334	Regulation of cell migration	22	915	0.56	5.8e-05	4.23657	10090.ENSMUSP00000004622,10090.ENSMUSP00000021689,10090.ENSMUSP00000023538,10090.ENSMUSP00000028062,10090.ENSMUSP00000028499,10090.ENSMUSP00000030286,10090.ENSMUSP00000031695,10090.ENSMUSP00000032754,10090.ENSMUSP00000038613,10090.ENSMUSP00000042271,10090.ENSMUSP00000047697,10090.ENSMUSP00000075167,10090.ENSMUSP00000079689,10090.ENSMUSP00000099652,10090.ENSMUSP00000102711,10090.ENSMUSP00000105867…	Gab2,Evl,Mylk,Vim,Itgav,Dock7,Wasl,Sema4b,Jcad,Spag9,Syne2,Abl1,Dab2,Tjp1,Jun,Rreb1,Pak3,Ssh1,Camsap3,Tiam1,Mef2c,Clasp1
GO:0007165	Signal transduction	51	3779	0.31	5.85e-05	4.23284	10090.ENSMUSP00000000369,10090.ENSMUSP00000004622,10090.ENSMUSP00000013886,10090.ENSMUSP00000020188,10090.ENSMUSP00000023467,10090.ENSMUSP00000023487,10090.ENSMUSP00000024958,10090.ENSMUSP00000026436,10090.ENSMUSP00000027517,10090.ENSMUSP00000027888,10090.ENSMUSP00000028062,10090.ENSMUSP00000028499,10090.ENSMUSP00000029766,10090.ENSMUSP00000030286,10090.ENSMUSP00000032192,10090.ENSMUSP00000032754…	Rem1,Gab2,Ppp1r12c,Ifngr1,Pak2,Arhgap31,Caskin1,Baiap2,Dgkd,Abl2,Vim,Itgav,Bcar3,Dock7,Itpr1,Sema4b,Bag3,Pak4,Spag9,Kif16b,Dok3,Rasd1,Ctnnd1,Arhgap20,Ppp1r12a,Abl1,Dapk1,Dab2,Pkd2,Chd8,Tjp2,Fyn,Sptbn1,Jun,Frmpd1,Mavs,Cdc42bpa,Pak3,Rasgrp2,Itsn1,Kalrn,Mapkap1,Abi1,Pag1,Tnik,Tiam1,Myo9b,Ppp1r12b,Mef2c,Arhgap32,Wnk3
GO:0051173	Positive regulation of nitrogen compound metabolic process	45	3119	0.34	6.3e-05	4.20066	10090.ENSMUSP00000006037,10090.ENSMUSP00000009699,10090.ENSMUSP00000020188,10090.ENSMUSP00000020315,10090.ENSMUSP00000023467,10090.ENSMUSP00000023741,10090.ENSMUSP00000027131,10090.ENSMUSP00000027888,10090.ENSMUSP00000028062,10090.ENSMUSP00000029766,10090.ENSMUSP00000030286,10090.ENSMUSP00000031695,10090.ENSMUSP00000033131,10090.ENSMUSP00000038613,10090.ENSMUSP00000038964,10090.ENSMUSP00000040486…	Ncoa2,Cdk9,Ifngr1,Cand1,Pak2,Kmt2d,Slc39a10,Abl2,Vim,Bcar3,Dock7,Wasl,Lamtor1,Jcad,Rbm3,Pak4,Irf2bpl,Spag9,Ctnnd1,Ppp1r12a,Abl1,Dapk1,Tfe3,Ablim1,Dab2,Pkd2,Smarca1,Chd8,Fyn,Jun,Mavs,Rreb1,Tnks1bp1,Pbrm1,Pak3,Arid1b,Whsc1l1,Fam129a,Mapkap1,Abi1,Tnik,Tiam1,Zfp219,Mef2c,Wnk3
GO:0060255	Regulation of macromolecule metabolic process	66	5618	0.25	6.66e-05	4.17653	10090.ENSMUSP00000006037,10090.ENSMUSP00000009699,10090.ENSMUSP00000020188,10090.ENSMUSP00000020315,10090.ENSMUSP00000022793,10090.ENSMUSP00000023467,10090.ENSMUSP00000023741,10090.ENSMUSP00000024709,10090.ENSMUSP00000025751,10090.ENSMUSP00000027131,10090.ENSMUSP00000027888,10090.ENSMUSP00000028062,10090.ENSMUSP00000028499,10090.ENSMUSP00000029766,10090.ENSMUSP00000030286,10090.ENSMUSP00000031695…	Ncoa2,Cdk9,Ifngr1,Cand1,Acin1,Pak2,Kmt2d,Cd2ap,Ighmbp2,Slc39a10,Abl2,Vim,Itgav,Bcar3,Dock7,Wasl,Lamtor1,Bag3,Kank2,Jcad,Rbm3,Pak4,Irf2bpl,Spag9,Kif16b,Ptpn13,Gas2l1,Rasd1,Irf2bp1,Ctnnd1,Cast,Abcd2,Ppp1r12a,Helz,Abl1,Dapk1,Tfe3,Ablim1,Dab2,Uri1,Pkd2,Smarca1,Chd8,Fyn,Sptbn1,Jun,Mavs,Rreb1,Oxr1,Tnks1bp1,Pbrm1,Pak3,Arid1b,Cbx5,Whsc1l1,Fam129a,Mapkap1,Abi1,Hnrnpm,Ssh1,Tnik,Tiam1,Zfp219,Mef2c,Wnk3,Rhox5
GO:0033043	Regulation of organelle organization	26	1258	0.49	6.94e-05	4.15864	10090.ENSMUSP00000009699,10090.ENSMUSP00000021689,10090.ENSMUSP00000023467,10090.ENSMUSP00000024709,10090.ENSMUSP00000026436,10090.ENSMUSP00000031695,10090.ENSMUSP00000033136,10090.ENSMUSP00000034717,10090.ENSMUSP00000035055,10090.ENSMUSP00000047697,10090.ENSMUSP00000050275,10090.ENSMUSP00000068374,10090.ENSMUSP00000075167,10090.ENSMUSP00000091435,10090.ENSMUSP00000099652,10090.ENSMUSP00000099819…	Cdk9,Evl,Pak2,Cd2ap,Baiap2,Wasl,Bag3,Kank2,Map4,Syne2,Gas2l1,Map1b,Abl1,Sept9,Tjp1,Vdac1,Sptbn1,Mavs,Pak3,Camsap1,Add1,Whsc1l1,Ssh1,Camsap3,Mef2c,Clasp1
GO:0044093	Positive regulation of molecular function	31	1711	0.43	7.24e-05	4.14026	10090.ENSMUSP00000009699,10090.ENSMUSP00000020188,10090.ENSMUSP00000023467,10090.ENSMUSP00000023487,10090.ENSMUSP00000027131,10090.ENSMUSP00000027888,10090.ENSMUSP00000029766,10090.ENSMUSP00000030286,10090.ENSMUSP00000040486,10090.ENSMUSP00000042271,10090.ENSMUSP00000065633,10090.ENSMUSP00000069257,10090.ENSMUSP00000075167,10090.ENSMUSP00000076666,10090.ENSMUSP00000079689,10090.ENSMUSP00000084041…	Cdk9,Ifngr1,Pak2,Arhgap31,Slc39a10,Abl2,Bcar3,Dock7,Pak4,Spag9,Arhgap20,Ppp1r12a,Abl1,Dapk1,Dab2,Pkd2,Fyn,Jun,Mavs,Pak3,Rasgrp2,Itsn1,Add1,Kalrn,Abi1,Tnik,Tiam1,Myo9b,Mef2c,Arhgap32,Wnk3
GO:0030335	Positive regulation of cell migration	17	567	0.65	7.54e-05	4.12263	10090.ENSMUSP00000004622,10090.ENSMUSP00000023538,10090.ENSMUSP00000028499,10090.ENSMUSP00000030286,10090.ENSMUSP00000032754,10090.ENSMUSP00000038613,10090.ENSMUSP00000042271,10090.ENSMUSP00000047697,10090.ENSMUSP00000075167,10090.ENSMUSP00000079689,10090.ENSMUSP00000099652,10090.ENSMUSP00000102711,10090.ENSMUSP00000105867,10090.ENSMUSP00000108485,10090.ENSMUSP00000124312,10090.ENSMUSP00000126020…	Gab2,Mylk,Itgav,Dock7,Sema4b,Jcad,Spag9,Syne2,Abl1,Dab2,Tjp1,Jun,Rreb1,Pak3,Ssh1,Tiam1,Clasp1
GO:0110053	Regulation of actin filament organization	12	266	0.83	7.54e-05	4.12263	10090.ENSMUSP00000021689,10090.ENSMUSP00000023467,10090.ENSMUSP00000026436,10090.ENSMUSP00000031695,10090.ENSMUSP00000034717,10090.ENSMUSP00000075167,10090.ENSMUSP00000099652,10090.ENSMUSP00000099902,10090.ENSMUSP00000108485,10090.ENSMUSP00000109979,10090.ENSMUSP00000124312,10090.ENSMUSP00000140019	Evl,Pak2,Baiap2,Wasl,Kank2,Abl1,Tjp1,Sptbn1,Pak3,Add1,Ssh1,Clasp1
GO:1905244	Regulation of modification of synaptic structure	5	18	1.62	7.67e-05	4.1152	10090.ENSMUSP00000026436,10090.ENSMUSP00000075167,10090.ENSMUSP00000109635,10090.ENSMUSP00000110611,10090.ENSMUSP00000126020	Baiap2,Abl1,Itsn1,Kalrn,Tiam1
GO:0048667	Cell morphogenesis involved in neuron differentiation	15	440	0.71	7.85e-05	4.10513	10090.ENSMUSP00000021689,10090.ENSMUSP00000027888,10090.ENSMUSP00000030286,10090.ENSMUSP00000031695,10090.ENSMUSP00000032754,10090.ENSMUSP00000068374,10090.ENSMUSP00000075167,10090.ENSMUSP00000078336,10090.ENSMUSP00000087714,10090.ENSMUSP00000091061,10090.ENSMUSP00000097547,10090.ENSMUSP00000108485,10090.ENSMUSP00000110611,10090.ENSMUSP00000118491,10090.ENSMUSP00000132547	Evl,Abl2,Dock7,Wasl,Sema4b,Map1b,Abl1,Ablim1,Trio,Nefh,Fyn,Pak3,Kalrn,Abi1,Mef2c
GO:0080090	Regulation of primary metabolic process	63	5290	0.25	8.73e-05	4.05899	10090.ENSMUSP00000001279,10090.ENSMUSP00000006037,10090.ENSMUSP00000009699,10090.ENSMUSP00000020188,10090.ENSMUSP00000020315,10090.ENSMUSP00000022793,10090.ENSMUSP00000023467,10090.ENSMUSP00000023741,10090.ENSMUSP00000025751,10090.ENSMUSP00000027131,10090.ENSMUSP00000027888,10090.ENSMUSP00000028062,10090.ENSMUSP00000028499,10090.ENSMUSP00000029766,10090.ENSMUSP00000030286,10090.ENSMUSP00000031695…	Lsr,Ncoa2,Cdk9,Ifngr1,Cand1,Acin1,Pak2,Kmt2d,Ighmbp2,Slc39a10,Abl2,Vim,Itgav,Bcar3,Dock7,Wasl,Lamtor1,Bag3,Kank2,Jcad,Rbm3,Pak4,Irf2bpl,Spag9,Ptpn13,Rasd1,Irf2bp1,Ctnnd1,Cast,Abcd2,Ppp1r12a,Abl1,Dapk1,Tfe3,Ablim1,Dab2,Uri1,Pkd2,Smarca1,Chd8,Fyn,Jun,Mavs,Rreb1,Oxr1,Tnks1bp1,Pbrm1,Pak3,Arid1b,Cbx5,Whsc1l1,Fam129a,Mapkap1,Abi1,Hnrnpm,Ssh1,Tnik,Tiam1,Zfp219,Pnpla2,Mef2c,Wnk3,Rhox5
GO:0032271	Regulation of protein polymerization	11	223	0.87	9.68e-05	4.01412	10090.ENSMUSP00000021689,10090.ENSMUSP00000026436,10090.ENSMUSP00000031695,10090.ENSMUSP00000068374,10090.ENSMUSP00000075167,10090.ENSMUSP00000099902,10090.ENSMUSP00000108485,10090.ENSMUSP00000109804,10090.ENSMUSP00000109979,10090.ENSMUSP00000124312,10090.ENSMUSP00000125993	Evl,Baiap2,Wasl,Map1b,Abl1,Sptbn1,Pak3,Camsap1,Add1,Ssh1,Camsap3
GO:0010639	Negative regulation of organelle organization	14	388	0.73	9.86e-05	4.00612	10090.ENSMUSP00000021689,10090.ENSMUSP00000023467,10090.ENSMUSP00000033136,10090.ENSMUSP00000034717,10090.ENSMUSP00000035055,10090.ENSMUSP00000050275,10090.ENSMUSP00000068374,10090.ENSMUSP00000099652,10090.ENSMUSP00000099902,10090.ENSMUSP00000109804,10090.ENSMUSP00000109979,10090.ENSMUSP00000124312,10090.ENSMUSP00000125993,10090.ENSMUSP00000140019	Evl,Pak2,Bag3,Kank2,Map4,Gas2l1,Map1b,Tjp1,Sptbn1,Camsap1,Add1,Ssh1,Camsap3,Clasp1
GO:0009893	Positive regulation of metabolic process	50	3767	0.3	0.00011	3.95861	10090.ENSMUSP00000006037,10090.ENSMUSP00000009699,10090.ENSMUSP00000020188,10090.ENSMUSP00000020315,10090.ENSMUSP00000023467,10090.ENSMUSP00000023741,10090.ENSMUSP00000027131,10090.ENSMUSP00000027888,10090.ENSMUSP00000028062,10090.ENSMUSP00000029766,10090.ENSMUSP00000030286,10090.ENSMUSP00000031695,10090.ENSMUSP00000033131,10090.ENSMUSP00000033136,10090.ENSMUSP00000038613,10090.ENSMUSP00000038964…	Ncoa2,Cdk9,Ifngr1,Cand1,Pak2,Kmt2d,Slc39a10,Abl2,Vim,Bcar3,Dock7,Wasl,Lamtor1,Bag3,Jcad,Rbm3,Pak4,Irf2bpl,Spag9,Ctnnd1,Abcd2,Ppp1r12a,Abl1,Dapk1,Tfe3,Ablim1,Dab2,Pkd2,Smarca1,Chd8,Fyn,Sptbn1,Jun,Mavs,Rreb1,Tnks1bp1,Pbrm1,Pak3,Itsn1,Arid1b,Whsc1l1,Fam129a,Mapkap1,Abi1,Tnik,Tiam1,Zfp219,Pnpla2,Mef2c,Wnk3
GO:0051129	Negative regulation of cellular component organization	19	733	0.59	0.00011	3.95861	10090.ENSMUSP00000021689,10090.ENSMUSP00000023467,10090.ENSMUSP00000028062,10090.ENSMUSP00000031695,10090.ENSMUSP00000032754,10090.ENSMUSP00000033136,10090.ENSMUSP00000034717,10090.ENSMUSP00000035055,10090.ENSMUSP00000050275,10090.ENSMUSP00000068374,10090.ENSMUSP00000079689,10090.ENSMUSP00000097547,10090.ENSMUSP00000099652,10090.ENSMUSP00000099902,10090.ENSMUSP00000109804,10090.ENSMUSP00000109979…	Evl,Pak2,Vim,Wasl,Sema4b,Bag3,Kank2,Map4,Gas2l1,Map1b,Dab2,Fyn,Tjp1,Sptbn1,Camsap1,Add1,Ssh1,Camsap3,Clasp1
GO:0051270	Regulation of cellular component movement	23	1048	0.52	0.00011	3.95861	10090.ENSMUSP00000004622,10090.ENSMUSP00000021689,10090.ENSMUSP00000023538,10090.ENSMUSP00000028062,10090.ENSMUSP00000028499,10090.ENSMUSP00000030286,10090.ENSMUSP00000031695,10090.ENSMUSP00000032754,10090.ENSMUSP00000038613,10090.ENSMUSP00000042271,10090.ENSMUSP00000047697,10090.ENSMUSP00000075167,10090.ENSMUSP00000079689,10090.ENSMUSP00000091061,10090.ENSMUSP00000099652,10090.ENSMUSP00000102711…	Gab2,Evl,Mylk,Vim,Itgav,Dock7,Wasl,Sema4b,Jcad,Spag9,Syne2,Abl1,Dab2,Nefh,Tjp1,Jun,Rreb1,Pak3,Ssh1,Camsap3,Tiam1,Mef2c,Clasp1
GO:0051049	Regulation of transport	32	1862	0.41	0.00012	3.92082	10090.ENSMUSP00000000369,10090.ENSMUSP00000004622,10090.ENSMUSP00000020188,10090.ENSMUSP00000023538,10090.ENSMUSP00000024709,10090.ENSMUSP00000028499,10090.ENSMUSP00000029708,10090.ENSMUSP00000031695,10090.ENSMUSP00000032192,10090.ENSMUSP00000033131,10090.ENSMUSP00000033136,10090.ENSMUSP00000036065,10090.ENSMUSP00000068374,10090.ENSMUSP00000069257,10090.ENSMUSP00000075167,10090.ENSMUSP00000075172…	Rem1,Gab2,Ifngr1,Mylk,Cd2ap,Itgav,Apoa1bp,Wasl,Itpr1,Lamtor1,Bag3,Reep2,Map1b,Ppp1r12a,Abl1,Frmd4a,Dapk1,Dab2,Pkd2,Sybu,Nefh,Fyn,Rhbdf2,Mavs,Itsn1,Add1,Kalrn,Hnrnpm,Tiam1,Mef2c,Wnk3,Clasp1
GO:0016310	Phosphorylation	23	1059	0.51	0.00013	3.88606	10090.ENSMUSP00000009699,10090.ENSMUSP00000023467,10090.ENSMUSP00000023538,10090.ENSMUSP00000025800,10090.ENSMUSP00000027517,10090.ENSMUSP00000027888,10090.ENSMUSP00000028499,10090.ENSMUSP00000040486,10090.ENSMUSP00000042271,10090.ENSMUSP00000050788,10090.ENSMUSP00000075167,10090.ENSMUSP00000076666,10090.ENSMUSP00000079689,10090.ENSMUSP00000087714,10090.ENSMUSP00000097547,10090.ENSMUSP00000099902…	Cdk9,Pak2,Mylk,Pip5k1b,Dgkd,Abl2,Itgav,Pak4,Spag9,Phkb,Abl1,Dapk1,Dab2,Trio,Fyn,Sptbn1,Cdc42bpa,Pak3,Kalrn,Abi1,Tnik,Mef2c,Wnk3
GO:0019220	Regulation of phosphate metabolic process	31	1776	0.42	0.00013	3.88606	10090.ENSMUSP00000009699,10090.ENSMUSP00000023467,10090.ENSMUSP00000027131,10090.ENSMUSP00000027888,10090.ENSMUSP00000029766,10090.ENSMUSP00000030286,10090.ENSMUSP00000033131,10090.ENSMUSP00000038613,10090.ENSMUSP00000040486,10090.ENSMUSP00000042271,10090.ENSMUSP00000048119,10090.ENSMUSP00000064518,10090.ENSMUSP00000069257,10090.ENSMUSP00000075167,10090.ENSMUSP00000079689,10090.ENSMUSP00000082646…	Cdk9,Pak2,Slc39a10,Abl2,Bcar3,Dock7,Lamtor1,Jcad,Pak4,Spag9,Ptpn13,Ctnnd1,Ppp1r12a,Abl1,Dab2,Uri1,Pkd2,Fyn,Jun,Mavs,Tnks1bp1,Pak3,Itsn1,Fam129a,Mapkap1,Abi1,Tnik,Camsap3,Tiam1,Mef2c,Wnk3
GO:1905274	Regulation of modification of postsynaptic actin cytoskeleton	4	8	1.88	0.00015	3.82391	10090.ENSMUSP00000026436,10090.ENSMUSP00000109635,10090.ENSMUSP00000110611,10090.ENSMUSP00000126020	Baiap2,Itsn1,Kalrn,Tiam1
GO:0007015	Actin filament organization	11	243	0.83	0.00018	3.74473	10090.ENSMUSP00000021689,10090.ENSMUSP00000024709,10090.ENSMUSP00000026436,10090.ENSMUSP00000027888,10090.ENSMUSP00000031695,10090.ENSMUSP00000039707,10090.ENSMUSP00000050275,10090.ENSMUSP00000075167,10090.ENSMUSP00000104322,10090.ENSMUSP00000109979,10090.ENSMUSP00000118491	Evl,Cd2ap,Baiap2,Abl2,Wasl,Micall2,Gas2l1,Abl1,Gas7,Add1,Abi1
GO:0043085	Positive regulation of catalytic activity	26	1341	0.46	0.00018	3.74473	10090.ENSMUSP00000023467,10090.ENSMUSP00000023487,10090.ENSMUSP00000027131,10090.ENSMUSP00000027888,10090.ENSMUSP00000029766,10090.ENSMUSP00000030286,10090.ENSMUSP00000040486,10090.ENSMUSP00000042271,10090.ENSMUSP00000065633,10090.ENSMUSP00000069257,10090.ENSMUSP00000075167,10090.ENSMUSP00000076666,10090.ENSMUSP00000079689,10090.ENSMUSP00000084041,10090.ENSMUSP00000097547,10090.ENSMUSP00000102711…	Pak2,Arhgap31,Slc39a10,Abl2,Bcar3,Dock7,Pak4,Spag9,Arhgap20,Ppp1r12a,Abl1,Dapk1,Dab2,Pkd2,Fyn,Jun,Pak3,Rasgrp2,Itsn1,Kalrn,Abi1,Tnik,Tiam1,Myo9b,Mef2c,Arhgap32
GO:0051641	Cellular localization	34	2115	0.38	0.00021	3.67778	10090.ENSMUSP00000027888,10090.ENSMUSP00000028499,10090.ENSMUSP00000029708,10090.ENSMUSP00000030286,10090.ENSMUSP00000031695,10090.ENSMUSP00000032192,10090.ENSMUSP00000033131,10090.ENSMUSP00000035055,10090.ENSMUSP00000036065,10090.ENSMUSP00000039707,10090.ENSMUSP00000042271,10090.ENSMUSP00000042551,10090.ENSMUSP00000044272,10090.ENSMUSP00000047697,10090.ENSMUSP00000050275,10090.ENSMUSP00000068374…	Abl2,Itgav,Apoa1bp,Dock7,Wasl,Itpr1,Lamtor1,Map4,Reep2,Micall2,Spag9,Kif16b,Sept14,Syne2,Gas2l1,Map1b,Pard3b,Dennd4c,Pkd2,Sybu,Sept9,Reps2,Sptbn1,Frmpd1,Cdc42bpa,Epb4.1l3,Itsn1,Kalrn,Map7,Tnik,Camsap3,Tiam1,Wnk3,Clasp1
GO:0048583	Regulation of response to stimulus	48	3651	0.29	0.00024	3.61979	10090.ENSMUSP00000004622,10090.ENSMUSP00000006037,10090.ENSMUSP00000009699,10090.ENSMUSP00000020188,10090.ENSMUSP00000023467,10090.ENSMUSP00000023538,10090.ENSMUSP00000023741,10090.ENSMUSP00000024709,10090.ENSMUSP00000026436,10090.ENSMUSP00000027131,10090.ENSMUSP00000027888,10090.ENSMUSP00000028499,10090.ENSMUSP00000029766,10090.ENSMUSP00000032192,10090.ENSMUSP00000032754,10090.ENSMUSP00000033131…	Gab2,Ncoa2,Cdk9,Ifngr1,Pak2,Mylk,Kmt2d,Cd2ap,Baiap2,Slc39a10,Abl2,Itgav,Bcar3,Itpr1,Sema4b,Lamtor1,Kank2,Jcad,Spag9,Ptpn13,Ctnnd1,Abcd2,Abl1,Dapk1,Dab2,Uri1,Pkd2,Chd8,Sybu,Fyn,Rhbdf2,Sptbn1,Jun,Frmpd1,Mavs,Rreb1,Oxr1,Cdc42bpa,Pak3,Itsn1,Kalrn,Mapkap1,Ssh1,Tnik,Tiam1,Myo9b,Mef2c,Clasp1
GO:0050793	Regulation of developmental process	39	2669	0.34	0.00028	3.55284	10090.ENSMUSP00000009699,10090.ENSMUSP00000022793,10090.ENSMUSP00000026436,10090.ENSMUSP00000027888,10090.ENSMUSP00000028062,10090.ENSMUSP00000028499,10090.ENSMUSP00000029708,10090.ENSMUSP00000030286,10090.ENSMUSP00000031695,10090.ENSMUSP00000032192,10090.ENSMUSP00000032754,10090.ENSMUSP00000033030,10090.ENSMUSP00000038613,10090.ENSMUSP00000040486,10090.ENSMUSP00000042271,10090.ENSMUSP00000050275…	Cdk9,Acin1,Baiap2,Abl2,Vim,Itgav,Apoa1bp,Dock7,Wasl,Itpr1,Sema4b,Parva,Jcad,Pak4,Spag9,Gas2l1,Epb4.1l2,Map1b,Abl1,Tfe3,Dab2,Trio,Tjp2,Fyn,Tjp1,Jun,Gas7,Rreb1,Epb4.1l3,Pak3,Itsn1,Camsap1,Add1,Kalrn,Tnik,Tiam1,Zfp219,Mef2c,Clasp1
GO:0065009	Regulation of molecular function	54	4379	0.27	0.00028	3.55284	10090.ENSMUSP00000000369,10090.ENSMUSP00000006037,10090.ENSMUSP00000009699,10090.ENSMUSP00000013886,10090.ENSMUSP00000020188,10090.ENSMUSP00000020315,10090.ENSMUSP00000023467,10090.ENSMUSP00000023487,10090.ENSMUSP00000023741,10090.ENSMUSP00000025751,10090.ENSMUSP00000027131,10090.ENSMUSP00000027888,10090.ENSMUSP00000029766,10090.ENSMUSP00000030286,10090.ENSMUSP00000032192,10090.ENSMUSP00000032754…	Rem1,Ncoa2,Cdk9,Ppp1r12c,Ifngr1,Cand1,Pak2,Arhgap31,Kmt2d,Ighmbp2,Slc39a10,Abl2,Bcar3,Dock7,Itpr1,Sema4b,Lamtor1,Bag3,Pak4,Irf2bpl,Spag9,Irf2bp1,Cast,Arhgap20,Ppp1r12a,Abl1,Dapk1,Tfe3,Dab2,Dennd4c,Uri1,Pkd2,Trio,Fyn,Jun,Mavs,Rreb1,Pak3,Rasgrp2,Itsn1,Add1,Kalrn,Whsc1l1,Abi1,Tnik,Camsap3,Tiam1,Zfp219,Myo9b,Ppp1r12b,Mef2c,Arhgap32,Wnk3,Rhox5
GO:0031399	Regulation of protein modification process	31	1856	0.4	0.00029	3.5376	10090.ENSMUSP00000009699,10090.ENSMUSP00000023467,10090.ENSMUSP00000027131,10090.ENSMUSP00000027888,10090.ENSMUSP00000029766,10090.ENSMUSP00000030286,10090.ENSMUSP00000033131,10090.ENSMUSP00000038613,10090.ENSMUSP00000040486,10090.ENSMUSP00000042271,10090.ENSMUSP00000048119,10090.ENSMUSP00000064518,10090.ENSMUSP00000069257,10090.ENSMUSP00000075167,10090.ENSMUSP00000079689,10090.ENSMUSP00000082646…	Cdk9,Pak2,Slc39a10,Abl2,Bcar3,Dock7,Lamtor1,Jcad,Pak4,Spag9,Ptpn13,Ctnnd1,Ppp1r12a,Abl1,Dab2,Uri1,Pkd2,Fyn,Jun,Mavs,Oxr1,Tnks1bp1,Pak3,Whsc1l1,Fam129a,Mapkap1,Abi1,Tnik,Tiam1,Mef2c,Wnk3
GO:0051171	Regulation of nitrogen compound metabolic process	60	5126	0.24	0.00029	3.5376	10090.ENSMUSP00000006037,10090.ENSMUSP00000009699,10090.ENSMUSP00000020188,10090.ENSMUSP00000020315,10090.ENSMUSP00000022793,10090.ENSMUSP00000023467,10090.ENSMUSP00000023741,10090.ENSMUSP00000025751,10090.ENSMUSP00000027131,10090.ENSMUSP00000027888,10090.ENSMUSP00000028062,10090.ENSMUSP00000028499,10090.ENSMUSP00000029766,10090.ENSMUSP00000030286,10090.ENSMUSP00000031695,10090.ENSMUSP00000033131…	Ncoa2,Cdk9,Ifngr1,Cand1,Acin1,Pak2,Kmt2d,Ighmbp2,Slc39a10,Abl2,Vim,Itgav,Bcar3,Dock7,Wasl,Lamtor1,Bag3,Kank2,Jcad,Rbm3,Pak4,Irf2bpl,Spag9,Ptpn13,Rasd1,Irf2bp1,Ctnnd1,Cast,Ppp1r12a,Abl1,Dapk1,Tfe3,Ablim1,Dab2,Uri1,Pkd2,Smarca1,Chd8,Fyn,Jun,Mavs,Rreb1,Oxr1,Tnks1bp1,Pbrm1,Pak3,Arid1b,Cbx5,Whsc1l1,Fam129a,Mapkap1,Abi1,Hnrnpm,Ssh1,Tnik,Tiam1,Zfp219,Mef2c,Wnk3,Rhox5
GO:0010604	Positive regulation of macromolecule metabolic process	46	3467	0.3	0.00033	3.48149	10090.ENSMUSP00000006037,10090.ENSMUSP00000009699,10090.ENSMUSP00000020188,10090.ENSMUSP00000020315,10090.ENSMUSP00000023467,10090.ENSMUSP00000023741,10090.ENSMUSP00000027131,10090.ENSMUSP00000027888,10090.ENSMUSP00000028062,10090.ENSMUSP00000029766,10090.ENSMUSP00000030286,10090.ENSMUSP00000031695,10090.ENSMUSP00000033131,10090.ENSMUSP00000038613,10090.ENSMUSP00000038964,10090.ENSMUSP00000040486…	Ncoa2,Cdk9,Ifngr1,Cand1,Pak2,Kmt2d,Slc39a10,Abl2,Vim,Bcar3,Dock7,Wasl,Lamtor1,Jcad,Rbm3,Pak4,Irf2bpl,Spag9,Ctnnd1,Ppp1r12a,Abl1,Dapk1,Tfe3,Ablim1,Dab2,Pkd2,Smarca1,Chd8,Fyn,Sptbn1,Jun,Mavs,Rreb1,Tnks1bp1,Pbrm1,Pak3,Arid1b,Whsc1l1,Fam129a,Mapkap1,Abi1,Tnik,Tiam1,Zfp219,Mef2c,Wnk3
GO:0042221	Response to chemical	48	3720	0.29	0.00039	3.40894	10090.ENSMUSP00000006037,10090.ENSMUSP00000009699,10090.ENSMUSP00000020188,10090.ENSMUSP00000021689,10090.ENSMUSP00000023467,10090.ENSMUSP00000023538,10090.ENSMUSP00000023741,10090.ENSMUSP00000026436,10090.ENSMUSP00000027517,10090.ENSMUSP00000027888,10090.ENSMUSP00000028062,10090.ENSMUSP00000028499,10090.ENSMUSP00000029766,10090.ENSMUSP00000032192,10090.ENSMUSP00000032754,10090.ENSMUSP00000033030…	Ncoa2,Cdk9,Ifngr1,Evl,Pak2,Mylk,Kmt2d,Baiap2,Dgkd,Abl2,Vim,Itgav,Bcar3,Itpr1,Sema4b,Parva,Lamtor1,Bag3,Pak4,Kif16b,Rcsd1,Gas2l1,Map1b,Ppp1r12a,Abl1,Dapk1,Ablim1,Dab2,Dennd4c,Uri1,Pkd2,Trio,Nefh,Tjp2,Fyn,Tjp1,Slc30a2,Jun,Mavs,Oxr1,Pak3,Rasgrp2,Add1,Map7,Ssh1,Myo9b,Mef2c,Wnk3
GO:0071310	Cellular response to organic substance	32	1987	0.38	0.0004	3.39794	10090.ENSMUSP00000006037,10090.ENSMUSP00000009699,10090.ENSMUSP00000020188,10090.ENSMUSP00000021689,10090.ENSMUSP00000023467,10090.ENSMUSP00000026436,10090.ENSMUSP00000027888,10090.ENSMUSP00000028062,10090.ENSMUSP00000029766,10090.ENSMUSP00000032192,10090.ENSMUSP00000033131,10090.ENSMUSP00000033136,10090.ENSMUSP00000040486,10090.ENSMUSP00000042551,10090.ENSMUSP00000050275,10090.ENSMUSP00000068374…	Ncoa2,Cdk9,Ifngr1,Evl,Pak2,Baiap2,Abl2,Vim,Bcar3,Itpr1,Lamtor1,Bag3,Pak4,Kif16b,Gas2l1,Map1b,Abl1,Dapk1,Dab2,Dennd4c,Uri1,Pkd2,Nefh,Tjp2,Fyn,Tjp1,Jun,Mavs,Pak3,Add1,Ssh1,Mef2c
GO:0030010	Establishment of cell polarity	8	129	0.97	0.00057	3.24413	10090.ENSMUSP00000030286,10090.ENSMUSP00000035055,10090.ENSMUSP00000068374,10090.ENSMUSP00000074837,10090.ENSMUSP00000075172,10090.ENSMUSP00000125993,10090.ENSMUSP00000129220,10090.ENSMUSP00000140019	Dock7,Map4,Map1b,Pard3b,Frmd4a,Camsap3,Myo9b,Clasp1
GO:0032501	Multicellular organismal process	68	6272	0.21	0.00057	3.24413	10090.ENSMUSP00000001279,10090.ENSMUSP00000004622,10090.ENSMUSP00000006037,10090.ENSMUSP00000020188,10090.ENSMUSP00000020695,10090.ENSMUSP00000021689,10090.ENSMUSP00000022793,10090.ENSMUSP00000023467,10090.ENSMUSP00000023538,10090.ENSMUSP00000023741,10090.ENSMUSP00000025751,10090.ENSMUSP00000026436,10090.ENSMUSP00000027888,10090.ENSMUSP00000028062,10090.ENSMUSP00000028499,10090.ENSMUSP00000029708…	Lsr,Gab2,Ncoa2,Ifngr1,Tns3,Evl,Acin1,Pak2,Mylk,Kmt2d,Ighmbp2,Baiap2,Abl2,Vim,Itgav,Apoa1bp,Bcar3,Dock7,Wasl,Itpr1,Sema4b,Parva,Bag3,Kank2,Map4,Reep2,Micall2,Pak4,Irf2bpl,Spag9,Kif16b,Rcsd1,Syne2,Ctnnd1,Map1b,Abcd2,Abl1,Ablim1,Dab2,Pkd2,Smarca1,Chd8,Sybu,Trio,Nefh,Tjp2,Fyn,Tjp1,Vdac1,Jun,Gas7,Oxr1,Pbrm1,Epb4.1l3,Pak3,Itsn1,Camsap1,Add1,Kalrn,Arid1b,Map7,Abi1,Tnik,Camsap3,Tiam1,Zfp219,Mef2c,Wnk3
GO:0007264	Small gtpase mediated signal transduction	11	279	0.77	0.00058	3.23657	10090.ENSMUSP00000023487,10090.ENSMUSP00000026436,10090.ENSMUSP00000029766,10090.ENSMUSP00000030286,10090.ENSMUSP00000046695,10090.ENSMUSP00000102711,10090.ENSMUSP00000109104,10090.ENSMUSP00000109635,10090.ENSMUSP00000126020,10090.ENSMUSP00000129220,10090.ENSMUSP00000133898	Arhgap31,Baiap2,Bcar3,Dock7,Dok3,Jun,Rasgrp2,Itsn1,Tiam1,Myo9b,Arhgap32
GO:0001932	Regulation of protein phosphorylation	26	1449	0.43	0.00061	3.21467	10090.ENSMUSP00000009699,10090.ENSMUSP00000023467,10090.ENSMUSP00000027888,10090.ENSMUSP00000029766,10090.ENSMUSP00000030286,10090.ENSMUSP00000033131,10090.ENSMUSP00000038613,10090.ENSMUSP00000040486,10090.ENSMUSP00000042271,10090.ENSMUSP00000048119,10090.ENSMUSP00000064518,10090.ENSMUSP00000075167,10090.ENSMUSP00000079689,10090.ENSMUSP00000084041,10090.ENSMUSP00000097547,10090.ENSMUSP00000102711…	Cdk9,Pak2,Abl2,Bcar3,Dock7,Lamtor1,Jcad,Pak4,Spag9,Ptpn13,Ctnnd1,Abl1,Dab2,Pkd2,Fyn,Jun,Mavs,Tnks1bp1,Pak3,Fam129a,Mapkap1,Abi1,Tnik,Tiam1,Mef2c,Wnk3
GO:0009966	Regulation of signal transduction	39	2767	0.33	0.00061	3.21467	10090.ENSMUSP00000006037,10090.ENSMUSP00000020188,10090.ENSMUSP00000023467,10090.ENSMUSP00000023741,10090.ENSMUSP00000024709,10090.ENSMUSP00000026436,10090.ENSMUSP00000027131,10090.ENSMUSP00000027888,10090.ENSMUSP00000028499,10090.ENSMUSP00000029766,10090.ENSMUSP00000032192,10090.ENSMUSP00000033131,10090.ENSMUSP00000034717,10090.ENSMUSP00000038613,10090.ENSMUSP00000042271,10090.ENSMUSP00000048119…	Ncoa2,Ifngr1,Pak2,Kmt2d,Cd2ap,Baiap2,Slc39a10,Abl2,Itgav,Bcar3,Itpr1,Lamtor1,Kank2,Jcad,Spag9,Ptpn13,Ctnnd1,Abl1,Dapk1,Dab2,Uri1,Pkd2,Chd8,Fyn,Rhbdf2,Sptbn1,Jun,Frmpd1,Mavs,Cdc42bpa,Pak3,Itsn1,Kalrn,Mapkap1,Ssh1,Tnik,Tiam1,Myo9b,Mef2c
GO:0006928	Movement of cell or subcellular component	25	1382	0.43	0.00083	3.08092	10090.ENSMUSP00000004622,10090.ENSMUSP00000020695,10090.ENSMUSP00000021689,10090.ENSMUSP00000024709,10090.ENSMUSP00000027888,10090.ENSMUSP00000028499,10090.ENSMUSP00000031695,10090.ENSMUSP00000032754,10090.ENSMUSP00000033030,10090.ENSMUSP00000034717,10090.ENSMUSP00000035055,10090.ENSMUSP00000042551,10090.ENSMUSP00000047697,10090.ENSMUSP00000068374,10090.ENSMUSP00000075167,10090.ENSMUSP00000078336…	Gab2,Tns3,Evl,Cd2ap,Abl2,Itgav,Wasl,Sema4b,Parva,Kank2,Map4,Kif16b,Syne2,Map1b,Abl1,Ablim1,Sybu,Trio,Fyn,Cdc42bpa,Camsap3,Tiam1,Myo9b,Mef2c,Rhox5
GO:0007026	Negative regulation of microtubule depolymerization	5	34	1.34	0.00083	3.08092	10090.ENSMUSP00000050275,10090.ENSMUSP00000068374,10090.ENSMUSP00000109804,10090.ENSMUSP00000125993,10090.ENSMUSP00000140019	Gas2l1,Map1b,Camsap1,Camsap3,Clasp1
GO:0000226	Microtubule cytoskeleton organization	14	484	0.64	0.00086	3.0655	10090.ENSMUSP00000024854,10090.ENSMUSP00000030286,10090.ENSMUSP00000035055,10090.ENSMUSP00000047697,10090.ENSMUSP00000050275,10090.ENSMUSP00000068374,10090.ENSMUSP00000069257,10090.ENSMUSP00000074837,10090.ENSMUSP00000091061,10090.ENSMUSP00000106746,10090.ENSMUSP00000109804,10090.ENSMUSP00000111963,10090.ENSMUSP00000125993,10090.ENSMUSP00000140019	Clip4,Dock7,Map4,Syne2,Gas2l1,Map1b,Ppp1r12a,Pard3b,Nefh,Cdc42bpa,Camsap1,Map7,Camsap3,Clasp1
GO:0042325	Regulation of phosphorylation	27	1591	0.41	0.001	3	10090.ENSMUSP00000009699,10090.ENSMUSP00000023467,10090.ENSMUSP00000027888,10090.ENSMUSP00000029766,10090.ENSMUSP00000030286,10090.ENSMUSP00000033131,10090.ENSMUSP00000038613,10090.ENSMUSP00000040486,10090.ENSMUSP00000042271,10090.ENSMUSP00000048119,10090.ENSMUSP00000064518,10090.ENSMUSP00000075167,10090.ENSMUSP00000079689,10090.ENSMUSP00000084041,10090.ENSMUSP00000097547,10090.ENSMUSP00000102711…	Cdk9,Pak2,Abl2,Bcar3,Dock7,Lamtor1,Jcad,Pak4,Spag9,Ptpn13,Ctnnd1,Abl1,Dab2,Pkd2,Fyn,Jun,Mavs,Tnks1bp1,Pak3,Itsn1,Fam129a,Mapkap1,Abi1,Tnik,Tiam1,Mef2c,Wnk3
GO:0060996	Dendritic spine development	5	36	1.32	0.001	3	10090.ENSMUSP00000023467,10090.ENSMUSP00000031695,10090.ENSMUSP00000040486,10090.ENSMUSP00000108485,10090.ENSMUSP00000111463	Pak2,Wasl,Pak4,Pak3,Arid1b
GO:0050790	Regulation of catalytic activity	33	2202	0.35	0.0011	2.95861	10090.ENSMUSP00000013886,10090.ENSMUSP00000020315,10090.ENSMUSP00000023467,10090.ENSMUSP00000023487,10090.ENSMUSP00000027131,10090.ENSMUSP00000027888,10090.ENSMUSP00000029766,10090.ENSMUSP00000030286,10090.ENSMUSP00000033136,10090.ENSMUSP00000040486,10090.ENSMUSP00000042271,10090.ENSMUSP00000065275,10090.ENSMUSP00000065633,10090.ENSMUSP00000069257,10090.ENSMUSP00000075167,10090.ENSMUSP00000076666…	Ppp1r12c,Cand1,Pak2,Arhgap31,Slc39a10,Abl2,Bcar3,Dock7,Bag3,Pak4,Spag9,Cast,Arhgap20,Ppp1r12a,Abl1,Dapk1,Dab2,Uri1,Pkd2,Fyn,Jun,Pak3,Rasgrp2,Itsn1,Kalrn,Abi1,Tnik,Camsap3,Tiam1,Myo9b,Ppp1r12b,Mef2c,Arhgap32
GO:0007017	Microtubule-based process	17	722	0.55	0.0012	2.92082	10090.ENSMUSP00000024854,10090.ENSMUSP00000030286,10090.ENSMUSP00000035055,10090.ENSMUSP00000042551,10090.ENSMUSP00000047697,10090.ENSMUSP00000050275,10090.ENSMUSP00000068374,10090.ENSMUSP00000069257,10090.ENSMUSP00000074837,10090.ENSMUSP00000087511,10090.ENSMUSP00000091061,10090.ENSMUSP00000106746,10090.ENSMUSP00000109804,10090.ENSMUSP00000111963,10090.ENSMUSP00000125993,10090.ENSMUSP00000139179…	Clip4,Dock7,Map4,Kif16b,Syne2,Gas2l1,Map1b,Ppp1r12a,Pard3b,Sybu,Nefh,Cdc42bpa,Camsap1,Map7,Camsap3,Rhox5,Clasp1
GO:0010629	Negative regulation of gene expression	29	1811	0.38	0.0013	2.88606	10090.ENSMUSP00000006037,10090.ENSMUSP00000009699,10090.ENSMUSP00000022793,10090.ENSMUSP00000023741,10090.ENSMUSP00000024709,10090.ENSMUSP00000025751,10090.ENSMUSP00000033136,10090.ENSMUSP00000034717,10090.ENSMUSP00000038964,10090.ENSMUSP00000040486,10090.ENSMUSP00000041070,10090.ENSMUSP00000050275,10090.ENSMUSP00000051959,10090.ENSMUSP00000061234,10090.ENSMUSP00000065275,10090.ENSMUSP00000068940…	Ncoa2,Cdk9,Acin1,Kmt2d,Cd2ap,Ighmbp2,Bag3,Kank2,Rbm3,Pak4,Irf2bpl,Gas2l1,Rasd1,Irf2bp1,Cast,Abcd2,Helz,Dapk1,Dab2,Uri1,Chd8,Fyn,Jun,Rreb1,Cbx5,Whsc1l1,Zfp219,Mef2c,Rhox5
GO:0044087	Regulation of cellular component biogenesis	20	978	0.49	0.0013	2.88606	10090.ENSMUSP00000020315,10090.ENSMUSP00000021689,10090.ENSMUSP00000023467,10090.ENSMUSP00000026436,10090.ENSMUSP00000031695,10090.ENSMUSP00000034717,10090.ENSMUSP00000035055,10090.ENSMUSP00000047697,10090.ENSMUSP00000068374,10090.ENSMUSP00000075167,10090.ENSMUSP00000091435,10090.ENSMUSP00000099652,10090.ENSMUSP00000099902,10090.ENSMUSP00000108485,10090.ENSMUSP00000109804,10090.ENSMUSP00000109979…	Cand1,Evl,Pak2,Baiap2,Wasl,Kank2,Map4,Syne2,Map1b,Abl1,Sept9,Tjp1,Sptbn1,Pak3,Camsap1,Add1,Ssh1,Camsap3,Mef2c,Clasp1
GO:0110020	Regulation of actomyosin structure organization	7	104	1	0.0013	2.88606	10090.ENSMUSP00000021689,10090.ENSMUSP00000023467,10090.ENSMUSP00000034717,10090.ENSMUSP00000075167,10090.ENSMUSP00000099652,10090.ENSMUSP00000132547,10090.ENSMUSP00000140019	Evl,Pak2,Kank2,Abl1,Tjp1,Mef2c,Clasp1
GO:0010720	Positive regulation of cell development	16	661	0.56	0.0015	2.82391	10090.ENSMUSP00000026436,10090.ENSMUSP00000027888,10090.ENSMUSP00000028062,10090.ENSMUSP00000032192,10090.ENSMUSP00000042271,10090.ENSMUSP00000068374,10090.ENSMUSP00000075167,10090.ENSMUSP00000079689,10090.ENSMUSP00000097547,10090.ENSMUSP00000105867,10090.ENSMUSP00000108485,10090.ENSMUSP00000109635,10090.ENSMUSP00000109979,10090.ENSMUSP00000110611,10090.ENSMUSP00000126020,10090.ENSMUSP00000132547	Baiap2,Abl2,Vim,Itpr1,Spag9,Map1b,Abl1,Dab2,Fyn,Rreb1,Pak3,Itsn1,Add1,Kalrn,Tiam1,Mef2c
GO:0023051	Regulation of signaling	42	3227	0.29	0.0015	2.82391	10090.ENSMUSP00000006037,10090.ENSMUSP00000020188,10090.ENSMUSP00000023467,10090.ENSMUSP00000023741,10090.ENSMUSP00000024709,10090.ENSMUSP00000026436,10090.ENSMUSP00000027131,10090.ENSMUSP00000027888,10090.ENSMUSP00000028499,10090.ENSMUSP00000029766,10090.ENSMUSP00000032192,10090.ENSMUSP00000033131,10090.ENSMUSP00000034717,10090.ENSMUSP00000038613,10090.ENSMUSP00000042271,10090.ENSMUSP00000042551…	Ncoa2,Ifngr1,Pak2,Kmt2d,Cd2ap,Baiap2,Slc39a10,Abl2,Itgav,Bcar3,Itpr1,Lamtor1,Kank2,Jcad,Spag9,Kif16b,Ptpn13,Ctnnd1,Map1b,Abl1,Dapk1,Dab2,Uri1,Pkd2,Chd8,Sybu,Fyn,Rhbdf2,Sptbn1,Jun,Frmpd1,Mavs,Cdc42bpa,Pak3,Itsn1,Kalrn,Mapkap1,Ssh1,Tnik,Tiam1,Myo9b,Mef2c
GO:0009892	Negative regulation of metabolic process	39	2895	0.31	0.0016	2.79588	10090.ENSMUSP00000006037,10090.ENSMUSP00000009699,10090.ENSMUSP00000022793,10090.ENSMUSP00000023467,10090.ENSMUSP00000023741,10090.ENSMUSP00000024709,10090.ENSMUSP00000025751,10090.ENSMUSP00000028499,10090.ENSMUSP00000030286,10090.ENSMUSP00000033136,10090.ENSMUSP00000034717,10090.ENSMUSP00000038964,10090.ENSMUSP00000040486,10090.ENSMUSP00000041070,10090.ENSMUSP00000048119,10090.ENSMUSP00000050275…	Ncoa2,Cdk9,Acin1,Pak2,Kmt2d,Cd2ap,Ighmbp2,Itgav,Dock7,Bag3,Kank2,Rbm3,Pak4,Irf2bpl,Ptpn13,Gas2l1,Rasd1,Irf2bp1,Cast,Abcd2,Helz,Abl1,Dapk1,Tfe3,Dab2,Uri1,Chd8,Fyn,Vdac1,Jun,Rreb1,Oxr1,Cbx5,Whsc1l1,Fam129a,Camsap3,Zfp219,Mef2c,Rhox5
GO:0065008	Regulation of biological quality	47	3822	0.27	0.0016	2.79588	10090.ENSMUSP00000001279,10090.ENSMUSP00000006037,10090.ENSMUSP00000021689,10090.ENSMUSP00000022793,10090.ENSMUSP00000026436,10090.ENSMUSP00000027131,10090.ENSMUSP00000027888,10090.ENSMUSP00000028062,10090.ENSMUSP00000028499,10090.ENSMUSP00000030286,10090.ENSMUSP00000031695,10090.ENSMUSP00000032192,10090.ENSMUSP00000032754,10090.ENSMUSP00000033030,10090.ENSMUSP00000033131,10090.ENSMUSP00000033136…	Lsr,Ncoa2,Evl,Acin1,Baiap2,Slc39a10,Abl2,Vim,Itgav,Dock7,Wasl,Itpr1,Sema4b,Parva,Lamtor1,Bag3,Heph,Pak4,Gas2l1,Epb4.1l2,Ctnnd1,Map1b,Abl1,Tfe3,Dab2,Pkd2,Sybu,Tjp2,Fyn,Tjp1,Sptbn1,Slc30a2,Jun,Gas7,Epb4.1l3,Pak3,Itsn1,Add1,Kalrn,Map7,Hnrnpm,Ssh1,Tnik,Tiam1,Pnpla2,Mef2c,Wnk3
GO:0051246	Regulation of protein metabolic process	38	2799	0.31	0.0017	2.76955	10090.ENSMUSP00000009699,10090.ENSMUSP00000020188,10090.ENSMUSP00000023467,10090.ENSMUSP00000027131,10090.ENSMUSP00000027888,10090.ENSMUSP00000028062,10090.ENSMUSP00000028499,10090.ENSMUSP00000029766,10090.ENSMUSP00000030286,10090.ENSMUSP00000033131,10090.ENSMUSP00000038613,10090.ENSMUSP00000038964,10090.ENSMUSP00000040486,10090.ENSMUSP00000042271,10090.ENSMUSP00000048119,10090.ENSMUSP00000064518…	Cdk9,Ifngr1,Pak2,Slc39a10,Abl2,Vim,Itgav,Bcar3,Dock7,Lamtor1,Jcad,Rbm3,Pak4,Spag9,Ptpn13,Ctnnd1,Cast,Ppp1r12a,Abl1,Dapk1,Dab2,Uri1,Pkd2,Fyn,Jun,Mavs,Oxr1,Tnks1bp1,Pak3,Whsc1l1,Fam129a,Mapkap1,Abi1,Ssh1,Tnik,Tiam1,Mef2c,Wnk3
GO:0045595	Regulation of cell differentiation	29	1868	0.37	0.0021	2.67778	10090.ENSMUSP00000009699,10090.ENSMUSP00000022793,10090.ENSMUSP00000026436,10090.ENSMUSP00000027888,10090.ENSMUSP00000028062,10090.ENSMUSP00000028499,10090.ENSMUSP00000030286,10090.ENSMUSP00000032192,10090.ENSMUSP00000032754,10090.ENSMUSP00000042271,10090.ENSMUSP00000050275,10090.ENSMUSP00000068374,10090.ENSMUSP00000075167,10090.ENSMUSP00000076864,10090.ENSMUSP00000079689,10090.ENSMUSP00000087714…	Cdk9,Acin1,Baiap2,Abl2,Vim,Itgav,Dock7,Itpr1,Sema4b,Spag9,Gas2l1,Map1b,Abl1,Tfe3,Dab2,Trio,Tjp2,Fyn,Jun,Rreb1,Pak3,Itsn1,Add1,Kalrn,Tnik,Tiam1,Zfp219,Mef2c,Clasp1
GO:0051345	Positive regulation of hydrolase activity	16	682	0.55	0.0021	2.67778	10090.ENSMUSP00000023487,10090.ENSMUSP00000027131,10090.ENSMUSP00000027888,10090.ENSMUSP00000029766,10090.ENSMUSP00000030286,10090.ENSMUSP00000065633,10090.ENSMUSP00000069257,10090.ENSMUSP00000076666,10090.ENSMUSP00000097547,10090.ENSMUSP00000102711,10090.ENSMUSP00000109104,10090.ENSMUSP00000110611,10090.ENSMUSP00000126020,10090.ENSMUSP00000129220,10090.ENSMUSP00000132547,10090.ENSMUSP00000133898	Arhgap31,Slc39a10,Abl2,Bcar3,Dock7,Arhgap20,Ppp1r12a,Dapk1,Fyn,Jun,Rasgrp2,Kalrn,Tiam1,Myo9b,Mef2c,Arhgap32
GO:0010975	Regulation of neuron projection development	15	607	0.57	0.0022	2.65758	10090.ENSMUSP00000026436,10090.ENSMUSP00000027888,10090.ENSMUSP00000028062,10090.ENSMUSP00000032192,10090.ENSMUSP00000032754,10090.ENSMUSP00000068374,10090.ENSMUSP00000075167,10090.ENSMUSP00000079689,10090.ENSMUSP00000097547,10090.ENSMUSP00000108485,10090.ENSMUSP00000109635,10090.ENSMUSP00000110611,10090.ENSMUSP00000125081,10090.ENSMUSP00000126020,10090.ENSMUSP00000132547	Baiap2,Abl2,Vim,Itpr1,Sema4b,Map1b,Abl1,Dab2,Fyn,Pak3,Itsn1,Kalrn,Tnik,Tiam1,Mef2c
GO:0043069	Negative regulation of programmed cell death	19	933	0.48	0.0022	2.65758	10090.ENSMUSP00000023467,10090.ENSMUSP00000027131,10090.ENSMUSP00000027888,10090.ENSMUSP00000028499,10090.ENSMUSP00000033136,10090.ENSMUSP00000034717,10090.ENSMUSP00000040486,10090.ENSMUSP00000065275,10090.ENSMUSP00000075167,10090.ENSMUSP00000076666,10090.ENSMUSP00000079689,10090.ENSMUSP00000082646,10090.ENSMUSP00000087184,10090.ENSMUSP00000097547,10090.ENSMUSP00000102711,10090.ENSMUSP00000105926…	Pak2,Slc39a10,Abl2,Itgav,Bag3,Kank2,Pak4,Cast,Abl1,Dapk1,Dab2,Uri1,Chd8,Fyn,Jun,Oxr1,Itsn1,Mef2c,Wnk3
GO:0008104	Protein localization	29	1890	0.36	0.0026	2.58503	10090.ENSMUSP00000001279,10090.ENSMUSP00000026436,10090.ENSMUSP00000027888,10090.ENSMUSP00000030760,10090.ENSMUSP00000031695,10090.ENSMUSP00000033131,10090.ENSMUSP00000036065,10090.ENSMUSP00000044272,10090.ENSMUSP00000047697,10090.ENSMUSP00000050275,10090.ENSMUSP00000054745,10090.ENSMUSP00000074837,10090.ENSMUSP00000075167,10090.ENSMUSP00000079689,10090.ENSMUSP00000080685,10090.ENSMUSP00000084041…	Lsr,Baiap2,Abl2,Necap2,Wasl,Lamtor1,Reep2,Sept14,Syne2,Gas2l1,Plekhf2,Pard3b,Abl1,Dab2,Dennd4c,Pkd2,Sept9,Rhbdf2,Tjp1,Sptbn1,Frmpd1,Epb4.1l3,Itsn1,Kalrn,Map7,Tnik,Camsap3,Tiam1,Wnk3
GO:0033554	Cellular response to stress	25	1493	0.4	0.0026	2.58503	10090.ENSMUSP00000009699,10090.ENSMUSP00000023467,10090.ENSMUSP00000023538,10090.ENSMUSP00000032192,10090.ENSMUSP00000033136,10090.ENSMUSP00000040486,10090.ENSMUSP00000042271,10090.ENSMUSP00000043724,10090.ENSMUSP00000050275,10090.ENSMUSP00000068374,10090.ENSMUSP00000075167,10090.ENSMUSP00000076666,10090.ENSMUSP00000079689,10090.ENSMUSP00000084041,10090.ENSMUSP00000091061,10090.ENSMUSP00000102711…	Cdk9,Pak2,Mylk,Itpr1,Bag3,Pak4,Spag9,Rcsd1,Gas2l1,Map1b,Abl1,Dapk1,Dab2,Pkd2,Nefh,Jun,Oxr1,Tnks1bp1,Pak3,Cbx5,Fam129a,Hnrnpm,Tnik,Mef2c,Wnk3
GO:0051239	Regulation of multicellular organismal process	41	3205	0.28	0.0028	2.55284	10090.ENSMUSP00000004622,10090.ENSMUSP00000009699,10090.ENSMUSP00000020188,10090.ENSMUSP00000021689,10090.ENSMUSP00000022793,10090.ENSMUSP00000024709,10090.ENSMUSP00000026436,10090.ENSMUSP00000027888,10090.ENSMUSP00000028062,10090.ENSMUSP00000028499,10090.ENSMUSP00000029708,10090.ENSMUSP00000030286,10090.ENSMUSP00000032192,10090.ENSMUSP00000032754,10090.ENSMUSP00000038613,10090.ENSMUSP00000040486…	Gab2,Cdk9,Ifngr1,Evl,Acin1,Cd2ap,Baiap2,Abl2,Vim,Itgav,Apoa1bp,Dock7,Itpr1,Sema4b,Jcad,Pak4,Spag9,Gas2l1,Map1b,Abcd2,Abl1,Tfe3,Dab2,Tjp2,Fyn,Tjp1,Sptbn1,Jun,Mavs,Rreb1,Pak3,Itsn1,Add1,Kalrn,Ssh1,Tnik,Tiam1,Zfp219,Mef2c,Wnk3,Clasp1
GO:0010468	Regulation of gene expression	48	4041	0.25	0.0029	2.5376	10090.ENSMUSP00000006037,10090.ENSMUSP00000009699,10090.ENSMUSP00000020188,10090.ENSMUSP00000020315,10090.ENSMUSP00000022793,10090.ENSMUSP00000023741,10090.ENSMUSP00000024709,10090.ENSMUSP00000025751,10090.ENSMUSP00000027888,10090.ENSMUSP00000028062,10090.ENSMUSP00000028499,10090.ENSMUSP00000031695,10090.ENSMUSP00000033136,10090.ENSMUSP00000034717,10090.ENSMUSP00000038964,10090.ENSMUSP00000040486…	Ncoa2,Cdk9,Ifngr1,Cand1,Acin1,Kmt2d,Cd2ap,Ighmbp2,Abl2,Vim,Itgav,Wasl,Bag3,Kank2,Rbm3,Pak4,Irf2bpl,Gas2l1,Rasd1,Irf2bp1,Ctnnd1,Cast,Abcd2,Ppp1r12a,Helz,Abl1,Dapk1,Tfe3,Ablim1,Dab2,Uri1,Pkd2,Smarca1,Chd8,Fyn,Sptbn1,Jun,Mavs,Rreb1,Pbrm1,Arid1b,Cbx5,Whsc1l1,Fam129a,Hnrnpm,Zfp219,Mef2c,Rhox5
GO:0010646	Regulation of cell communication	41	3215	0.28	0.0029	2.5376	10090.ENSMUSP00000006037,10090.ENSMUSP00000020188,10090.ENSMUSP00000023467,10090.ENSMUSP00000023741,10090.ENSMUSP00000024709,10090.ENSMUSP00000026436,10090.ENSMUSP00000027131,10090.ENSMUSP00000027888,10090.ENSMUSP00000028499,10090.ENSMUSP00000029766,10090.ENSMUSP00000032192,10090.ENSMUSP00000033131,10090.ENSMUSP00000034717,10090.ENSMUSP00000038613,10090.ENSMUSP00000042271,10090.ENSMUSP00000048119…	Ncoa2,Ifngr1,Pak2,Kmt2d,Cd2ap,Baiap2,Slc39a10,Abl2,Itgav,Bcar3,Itpr1,Lamtor1,Kank2,Jcad,Spag9,Ptpn13,Ctnnd1,Map1b,Abl1,Dapk1,Dab2,Uri1,Pkd2,Chd8,Sybu,Fyn,Rhbdf2,Sptbn1,Jun,Frmpd1,Mavs,Cdc42bpa,Pak3,Itsn1,Kalrn,Mapkap1,Ssh1,Tnik,Tiam1,Myo9b,Mef2c
GO:0051240	Positive regulation of multicellular organismal process	29	1902	0.36	0.0029	2.5376	10090.ENSMUSP00000004622,10090.ENSMUSP00000009699,10090.ENSMUSP00000020188,10090.ENSMUSP00000022793,10090.ENSMUSP00000026436,10090.ENSMUSP00000027888,10090.ENSMUSP00000028062,10090.ENSMUSP00000032192,10090.ENSMUSP00000038613,10090.ENSMUSP00000040486,10090.ENSMUSP00000042271,10090.ENSMUSP00000068374,10090.ENSMUSP00000075167,10090.ENSMUSP00000079689,10090.ENSMUSP00000097547,10090.ENSMUSP00000099652…	Gab2,Cdk9,Ifngr1,Acin1,Baiap2,Abl2,Vim,Itpr1,Jcad,Pak4,Spag9,Map1b,Abl1,Dab2,Fyn,Tjp1,Sptbn1,Jun,Mavs,Rreb1,Pak3,Itsn1,Add1,Kalrn,Ssh1,Tiam1,Zfp219,Mef2c,Clasp1
GO:0010769	Regulation of cell morphogenesis involved in differentiation	11	343	0.68	0.003	2.52288	10090.ENSMUSP00000026436,10090.ENSMUSP00000028062,10090.ENSMUSP00000032754,10090.ENSMUSP00000068374,10090.ENSMUSP00000075167,10090.ENSMUSP00000079689,10090.ENSMUSP00000105867,10090.ENSMUSP00000108485,10090.ENSMUSP00000110611,10090.ENSMUSP00000125081,10090.ENSMUSP00000126020	Baiap2,Vim,Sema4b,Map1b,Abl1,Dab2,Rreb1,Pak3,Kalrn,Tnik,Tiam1
GO:0032268	Regulation of cellular protein metabolic process	36	2657	0.31	0.003	2.52288	10090.ENSMUSP00000009699,10090.ENSMUSP00000023467,10090.ENSMUSP00000027131,10090.ENSMUSP00000027888,10090.ENSMUSP00000028062,10090.ENSMUSP00000029766,10090.ENSMUSP00000030286,10090.ENSMUSP00000033131,10090.ENSMUSP00000038613,10090.ENSMUSP00000038964,10090.ENSMUSP00000040486,10090.ENSMUSP00000042271,10090.ENSMUSP00000048119,10090.ENSMUSP00000064518,10090.ENSMUSP00000065275,10090.ENSMUSP00000069257…	Cdk9,Pak2,Slc39a10,Abl2,Vim,Bcar3,Dock7,Lamtor1,Jcad,Rbm3,Pak4,Spag9,Ptpn13,Ctnnd1,Cast,Ppp1r12a,Abl1,Dapk1,Dab2,Uri1,Pkd2,Fyn,Jun,Mavs,Oxr1,Tnks1bp1,Pak3,Whsc1l1,Fam129a,Mapkap1,Abi1,Ssh1,Tnik,Tiam1,Mef2c,Wnk3
GO:0060548	Negative regulation of cell death	20	1046	0.46	0.003	2.52288	10090.ENSMUSP00000023467,10090.ENSMUSP00000027131,10090.ENSMUSP00000027888,10090.ENSMUSP00000028499,10090.ENSMUSP00000032192,10090.ENSMUSP00000033136,10090.ENSMUSP00000034717,10090.ENSMUSP00000040486,10090.ENSMUSP00000065275,10090.ENSMUSP00000075167,10090.ENSMUSP00000076666,10090.ENSMUSP00000079689,10090.ENSMUSP00000082646,10090.ENSMUSP00000087184,10090.ENSMUSP00000097547,10090.ENSMUSP00000102711…	Pak2,Slc39a10,Abl2,Itgav,Itpr1,Bag3,Kank2,Pak4,Cast,Abl1,Dapk1,Dab2,Uri1,Chd8,Fyn,Jun,Oxr1,Itsn1,Mef2c,Wnk3
GO:0050803	Regulation of synapse structure or activity	10	286	0.72	0.0034	2.46852	10090.ENSMUSP00000026436,10090.ENSMUSP00000075167,10090.ENSMUSP00000087511,10090.ENSMUSP00000097547,10090.ENSMUSP00000108485,10090.ENSMUSP00000109635,10090.ENSMUSP00000110611,10090.ENSMUSP00000124312,10090.ENSMUSP00000126020,10090.ENSMUSP00000132547	Baiap2,Abl1,Sybu,Fyn,Pak3,Itsn1,Kalrn,Ssh1,Tiam1,Mef2c
GO:0071277	Cellular response to calcium ion	6	86	1.02	0.0039	2.40894	10090.ENSMUSP00000023538,10090.ENSMUSP00000084041,10090.ENSMUSP00000102711,10090.ENSMUSP00000109104,10090.ENSMUSP00000109979,10090.ENSMUSP00000132547	Mylk,Pkd2,Jun,Rasgrp2,Add1,Mef2c
GO:0060284	Regulation of cell development	20	1086	0.44	0.0049	2.3098	10090.ENSMUSP00000026436,10090.ENSMUSP00000027888,10090.ENSMUSP00000028062,10090.ENSMUSP00000030286,10090.ENSMUSP00000032192,10090.ENSMUSP00000032754,10090.ENSMUSP00000042271,10090.ENSMUSP00000068374,10090.ENSMUSP00000075167,10090.ENSMUSP00000079689,10090.ENSMUSP00000097154,10090.ENSMUSP00000097547,10090.ENSMUSP00000105867,10090.ENSMUSP00000108485,10090.ENSMUSP00000109635,10090.ENSMUSP00000109979…	Baiap2,Abl2,Vim,Dock7,Itpr1,Sema4b,Spag9,Map1b,Abl1,Dab2,Tjp2,Fyn,Rreb1,Pak3,Itsn1,Add1,Kalrn,Tnik,Tiam1,Mef2c
GO:0043066	Negative regulation of apoptotic process	18	913	0.47	0.0051	2.29243	10090.ENSMUSP00000023467,10090.ENSMUSP00000027131,10090.ENSMUSP00000027888,10090.ENSMUSP00000028499,10090.ENSMUSP00000033136,10090.ENSMUSP00000040486,10090.ENSMUSP00000065275,10090.ENSMUSP00000075167,10090.ENSMUSP00000076666,10090.ENSMUSP00000079689,10090.ENSMUSP00000082646,10090.ENSMUSP00000087184,10090.ENSMUSP00000097547,10090.ENSMUSP00000102711,10090.ENSMUSP00000105926,10090.ENSMUSP00000109635…	Pak2,Slc39a10,Abl2,Itgav,Bag3,Pak4,Cast,Abl1,Dapk1,Dab2,Uri1,Chd8,Fyn,Jun,Oxr1,Itsn1,Mef2c,Wnk3
GO:2000050	Regulation of non-canonical wnt signaling pathway	4	26	1.36	0.0051	2.29243	10090.ENSMUSP00000027888,10090.ENSMUSP00000075167,10090.ENSMUSP00000079689,10090.ENSMUSP00000126020	Abl2,Abl1,Dab2,Tiam1
GO:2000096	Positive regulation of wnt signaling pathway, planar cell polarity pathway	3	8	1.75	0.0051	2.29243	10090.ENSMUSP00000027888,10090.ENSMUSP00000075167,10090.ENSMUSP00000079689	Abl2,Abl1,Dab2
GO:0043254	Regulation of protein-containing complex assembly	12	437	0.61	0.0052	2.284	10090.ENSMUSP00000020315,10090.ENSMUSP00000021689,10090.ENSMUSP00000026436,10090.ENSMUSP00000031695,10090.ENSMUSP00000068374,10090.ENSMUSP00000075167,10090.ENSMUSP00000099902,10090.ENSMUSP00000108485,10090.ENSMUSP00000109804,10090.ENSMUSP00000109979,10090.ENSMUSP00000124312,10090.ENSMUSP00000125993	Cand1,Evl,Baiap2,Wasl,Map1b,Abl1,Sptbn1,Pak3,Camsap1,Add1,Ssh1,Camsap3
GO:0051336	Regulation of hydrolase activity	21	1184	0.42	0.0052	2.284	10090.ENSMUSP00000023467,10090.ENSMUSP00000023487,10090.ENSMUSP00000027131,10090.ENSMUSP00000027888,10090.ENSMUSP00000029766,10090.ENSMUSP00000030286,10090.ENSMUSP00000065275,10090.ENSMUSP00000065633,10090.ENSMUSP00000069257,10090.ENSMUSP00000075167,10090.ENSMUSP00000076666,10090.ENSMUSP00000082646,10090.ENSMUSP00000097547,10090.ENSMUSP00000102711,10090.ENSMUSP00000109104,10090.ENSMUSP00000110611…	Pak2,Arhgap31,Slc39a10,Abl2,Bcar3,Dock7,Cast,Arhgap20,Ppp1r12a,Abl1,Dapk1,Uri1,Fyn,Jun,Rasgrp2,Kalrn,Camsap3,Tiam1,Myo9b,Mef2c,Arhgap32
GO:0006796	Phosphate-containing compound metabolic process	27	1776	0.36	0.0054	2.26761	10090.ENSMUSP00000009699,10090.ENSMUSP00000023467,10090.ENSMUSP00000023538,10090.ENSMUSP00000025800,10090.ENSMUSP00000027517,10090.ENSMUSP00000027888,10090.ENSMUSP00000028499,10090.ENSMUSP00000029708,10090.ENSMUSP00000040486,10090.ENSMUSP00000042271,10090.ENSMUSP00000048119,10090.ENSMUSP00000050788,10090.ENSMUSP00000069257,10090.ENSMUSP00000075167,10090.ENSMUSP00000076666,10090.ENSMUSP00000079689…	Cdk9,Pak2,Mylk,Pip5k1b,Dgkd,Abl2,Itgav,Apoa1bp,Pak4,Spag9,Ptpn13,Phkb,Ppp1r12a,Abl1,Dapk1,Dab2,Trio,Fyn,Sptbn1,Cdc42bpa,Pak3,Kalrn,Abi1,Ssh1,Tnik,Mef2c,Wnk3
GO:0008154	Actin polymerization or depolymerization	5	55	1.13	0.0054	2.26761	10090.ENSMUSP00000021689,10090.ENSMUSP00000031695,10090.ENSMUSP00000039707,10090.ENSMUSP00000104322,10090.ENSMUSP00000118491	Evl,Wasl,Micall2,Gas7,Abi1
GO:0010033	Response to organic substance	36	2742	0.29	0.0054	2.26761	10090.ENSMUSP00000006037,10090.ENSMUSP00000009699,10090.ENSMUSP00000020188,10090.ENSMUSP00000021689,10090.ENSMUSP00000023467,10090.ENSMUSP00000023741,10090.ENSMUSP00000026436,10090.ENSMUSP00000027517,10090.ENSMUSP00000027888,10090.ENSMUSP00000028062,10090.ENSMUSP00000028499,10090.ENSMUSP00000029766,10090.ENSMUSP00000032192,10090.ENSMUSP00000033131,10090.ENSMUSP00000033136,10090.ENSMUSP00000040486…	Ncoa2,Cdk9,Ifngr1,Evl,Pak2,Kmt2d,Baiap2,Dgkd,Abl2,Vim,Itgav,Bcar3,Itpr1,Lamtor1,Bag3,Pak4,Kif16b,Gas2l1,Map1b,Abl1,Dapk1,Dab2,Dennd4c,Uri1,Pkd2,Nefh,Tjp2,Fyn,Tjp1,Jun,Mavs,Pak3,Add1,Map7,Ssh1,Mef2c
GO:0031110	Regulation of microtubule polymerization or depolymerization	6	92	0.99	0.0054	2.26761	10090.ENSMUSP00000050275,10090.ENSMUSP00000068374,10090.ENSMUSP00000075167,10090.ENSMUSP00000109804,10090.ENSMUSP00000125993,10090.ENSMUSP00000140019	Gas2l1,Map1b,Abl1,Camsap1,Camsap3,Clasp1
GO:0051492	Regulation of stress fiber assembly	6	92	0.99	0.0054	2.26761	10090.ENSMUSP00000021689,10090.ENSMUSP00000023467,10090.ENSMUSP00000034717,10090.ENSMUSP00000075167,10090.ENSMUSP00000099652,10090.ENSMUSP00000140019	Evl,Pak2,Kank2,Abl1,Tjp1,Clasp1
GO:0051497	Negative regulation of stress fiber assembly	4	27	1.35	0.0054	2.26761	10090.ENSMUSP00000023467,10090.ENSMUSP00000034717,10090.ENSMUSP00000099652,10090.ENSMUSP00000140019	Pak2,Kank2,Tjp1,Clasp1
GO:0010770	Positive regulation of cell morphogenesis involved in differentiation	8	189	0.8	0.0055	2.25964	10090.ENSMUSP00000026436,10090.ENSMUSP00000068374,10090.ENSMUSP00000075167,10090.ENSMUSP00000079689,10090.ENSMUSP00000105867,10090.ENSMUSP00000108485,10090.ENSMUSP00000110611,10090.ENSMUSP00000126020	Baiap2,Map1b,Abl1,Dab2,Rreb1,Pak3,Kalrn,Tiam1
GO:0045597	Positive regulation of cell differentiation	20	1103	0.43	0.0056	2.25181	10090.ENSMUSP00000022793,10090.ENSMUSP00000026436,10090.ENSMUSP00000027888,10090.ENSMUSP00000028062,10090.ENSMUSP00000032192,10090.ENSMUSP00000042271,10090.ENSMUSP00000068374,10090.ENSMUSP00000075167,10090.ENSMUSP00000076864,10090.ENSMUSP00000079689,10090.ENSMUSP00000097547,10090.ENSMUSP00000102711,10090.ENSMUSP00000105867,10090.ENSMUSP00000108485,10090.ENSMUSP00000109635,10090.ENSMUSP00000109979…	Acin1,Baiap2,Abl2,Vim,Itpr1,Spag9,Map1b,Abl1,Tfe3,Dab2,Fyn,Jun,Rreb1,Pak3,Itsn1,Add1,Kalrn,Tiam1,Zfp219,Mef2c
GO:0060998	Regulation of dendritic spine development	6	94	0.98	0.0057	2.24413	10090.ENSMUSP00000026436,10090.ENSMUSP00000108485,10090.ENSMUSP00000109635,10090.ENSMUSP00000110611,10090.ENSMUSP00000126020,10090.ENSMUSP00000132547	Baiap2,Pak3,Itsn1,Kalrn,Tiam1,Mef2c
GO:0010605	Negative regulation of macromolecule metabolic process	35	2646	0.3	0.0058	2.23657	10090.ENSMUSP00000006037,10090.ENSMUSP00000009699,10090.ENSMUSP00000022793,10090.ENSMUSP00000023467,10090.ENSMUSP00000023741,10090.ENSMUSP00000024709,10090.ENSMUSP00000025751,10090.ENSMUSP00000028499,10090.ENSMUSP00000033136,10090.ENSMUSP00000034717,10090.ENSMUSP00000038964,10090.ENSMUSP00000040486,10090.ENSMUSP00000041070,10090.ENSMUSP00000048119,10090.ENSMUSP00000050275,10090.ENSMUSP00000051959…	Ncoa2,Cdk9,Acin1,Pak2,Kmt2d,Cd2ap,Ighmbp2,Itgav,Bag3,Kank2,Rbm3,Pak4,Irf2bpl,Ptpn13,Gas2l1,Rasd1,Irf2bp1,Cast,Abcd2,Helz,Abl1,Dapk1,Dab2,Uri1,Chd8,Fyn,Jun,Rreb1,Oxr1,Cbx5,Whsc1l1,Fam129a,Zfp219,Mef2c,Rhox5
GO:0051050	Positive regulation of transport	19	1020	0.45	0.006	2.22185	10090.ENSMUSP00000004622,10090.ENSMUSP00000020188,10090.ENSMUSP00000023538,10090.ENSMUSP00000024709,10090.ENSMUSP00000031695,10090.ENSMUSP00000032192,10090.ENSMUSP00000033136,10090.ENSMUSP00000075167,10090.ENSMUSP00000075172,10090.ENSMUSP00000079689,10090.ENSMUSP00000084041,10090.ENSMUSP00000087511,10090.ENSMUSP00000097547,10090.ENSMUSP00000105828,10090.ENSMUSP00000109635,10090.ENSMUSP00000109979…	Gab2,Ifngr1,Mylk,Cd2ap,Wasl,Itpr1,Bag3,Abl1,Frmd4a,Dab2,Pkd2,Sybu,Fyn,Mavs,Itsn1,Add1,Hnrnpm,Wnk3,Clasp1
GO:0061003	Positive regulation of dendritic spine morphogenesis	4	28	1.33	0.006	2.22185	10090.ENSMUSP00000026436,10090.ENSMUSP00000108485,10090.ENSMUSP00000110611,10090.ENSMUSP00000126020	Baiap2,Pak3,Kalrn,Tiam1
GO:0023014	Signal transduction by protein phosphorylation	8	194	0.79	0.0063	2.20066	10090.ENSMUSP00000023467,10090.ENSMUSP00000028499,10090.ENSMUSP00000040486,10090.ENSMUSP00000042271,10090.ENSMUSP00000079689,10090.ENSMUSP00000108485,10090.ENSMUSP00000125081,10090.ENSMUSP00000132547	Pak2,Itgav,Pak4,Spag9,Dab2,Pak3,Tnik,Mef2c
GO:0061564	Axon development	11	386	0.63	0.0072	2.14267	10090.ENSMUSP00000021689,10090.ENSMUSP00000030286,10090.ENSMUSP00000032754,10090.ENSMUSP00000068374,10090.ENSMUSP00000075167,10090.ENSMUSP00000078336,10090.ENSMUSP00000087714,10090.ENSMUSP00000091061,10090.ENSMUSP00000102711,10090.ENSMUSP00000108485,10090.ENSMUSP00000110611	Evl,Dock7,Sema4b,Map1b,Abl1,Ablim1,Trio,Nefh,Jun,Pak3,Kalrn
GO:0045664	Regulation of neuron differentiation	16	774	0.49	0.0073	2.13668	10090.ENSMUSP00000026436,10090.ENSMUSP00000027888,10090.ENSMUSP00000028062,10090.ENSMUSP00000032192,10090.ENSMUSP00000032754,10090.ENSMUSP00000042271,10090.ENSMUSP00000068374,10090.ENSMUSP00000075167,10090.ENSMUSP00000079689,10090.ENSMUSP00000097547,10090.ENSMUSP00000108485,10090.ENSMUSP00000109635,10090.ENSMUSP00000110611,10090.ENSMUSP00000125081,10090.ENSMUSP00000126020,10090.ENSMUSP00000132547	Baiap2,Abl2,Vim,Itpr1,Sema4b,Spag9,Map1b,Abl1,Dab2,Fyn,Pak3,Itsn1,Kalrn,Tnik,Tiam1,Mef2c
GO:0060999	Positive regulation of dendritic spine development	5	61	1.09	0.0077	2.11351	10090.ENSMUSP00000026436,10090.ENSMUSP00000108485,10090.ENSMUSP00000109635,10090.ENSMUSP00000110611,10090.ENSMUSP00000126020	Baiap2,Pak3,Itsn1,Kalrn,Tiam1
GO:0012501	Programmed cell death	17	866	0.47	0.0079	2.10237	10090.ENSMUSP00000022793,10090.ENSMUSP00000023467,10090.ENSMUSP00000028499,10090.ENSMUSP00000032192,10090.ENSMUSP00000033136,10090.ENSMUSP00000034717,10090.ENSMUSP00000040486,10090.ENSMUSP00000075167,10090.ENSMUSP00000076666,10090.ENSMUSP00000079689,10090.ENSMUSP00000099819,10090.ENSMUSP00000102711,10090.ENSMUSP00000105926,10090.ENSMUSP00000108300,10090.ENSMUSP00000126020,10090.ENSMUSP00000132547…	Acin1,Pak2,Itgav,Itpr1,Bag3,Kank2,Pak4,Abl1,Dapk1,Dab2,Vdac1,Jun,Oxr1,Epb4.1l3,Tiam1,Mef2c,Rhox5
GO:0030855	Epithelial cell differentiation	13	540	0.56	0.0082	2.08619	10090.ENSMUSP00000027888,10090.ENSMUSP00000028062,10090.ENSMUSP00000064518,10090.ENSMUSP00000075167,10090.ENSMUSP00000079689,10090.ENSMUSP00000097154,10090.ENSMUSP00000099652,10090.ENSMUSP00000099819,10090.ENSMUSP00000102711,10090.ENSMUSP00000107727,10090.ENSMUSP00000111963,10090.ENSMUSP00000125993,10090.ENSMUSP00000132547	Abl2,Vim,Ctnnd1,Abl1,Dab2,Tjp2,Tjp1,Vdac1,Jun,Pbrm1,Map7,Camsap3,Mef2c
GO:0051130	Positive regulation of cellular component organization	21	1236	0.41	0.0083	2.08092	10090.ENSMUSP00000009699,10090.ENSMUSP00000020315,10090.ENSMUSP00000021689,10090.ENSMUSP00000026436,10090.ENSMUSP00000027888,10090.ENSMUSP00000031695,10090.ENSMUSP00000032192,10090.ENSMUSP00000068374,10090.ENSMUSP00000075167,10090.ENSMUSP00000079689,10090.ENSMUSP00000091435,10090.ENSMUSP00000097547,10090.ENSMUSP00000105867,10090.ENSMUSP00000108485,10090.ENSMUSP00000109635,10090.ENSMUSP00000109979…	Cdk9,Cand1,Evl,Baiap2,Abl2,Wasl,Itpr1,Map1b,Abl1,Dab2,Sept9,Fyn,Rreb1,Pak3,Itsn1,Add1,Kalrn,Whsc1l1,Ssh1,Tiam1,Clasp1
GO:2000026	Regulation of multicellular organismal development	30	2150	0.32	0.0083	2.08092	10090.ENSMUSP00000022793,10090.ENSMUSP00000026436,10090.ENSMUSP00000027888,10090.ENSMUSP00000028062,10090.ENSMUSP00000029708,10090.ENSMUSP00000030286,10090.ENSMUSP00000032192,10090.ENSMUSP00000032754,10090.ENSMUSP00000038613,10090.ENSMUSP00000040486,10090.ENSMUSP00000042271,10090.ENSMUSP00000050275,10090.ENSMUSP00000068374,10090.ENSMUSP00000075167,10090.ENSMUSP00000076864,10090.ENSMUSP00000079689…	Acin1,Baiap2,Abl2,Vim,Apoa1bp,Dock7,Itpr1,Sema4b,Jcad,Pak4,Spag9,Gas2l1,Map1b,Abl1,Tfe3,Dab2,Tjp2,Fyn,Tjp1,Jun,Rreb1,Pak3,Itsn1,Add1,Kalrn,Tnik,Tiam1,Zfp219,Mef2c,Clasp1
GO:0008360	Regulation of cell shape	7	151	0.84	0.0087	2.06048	10090.ENSMUSP00000026436,10090.ENSMUSP00000031695,10090.ENSMUSP00000033030,10090.ENSMUSP00000055122,10090.ENSMUSP00000097547,10090.ENSMUSP00000104322,10090.ENSMUSP00000108300	Baiap2,Wasl,Parva,Epb4.1l2,Fyn,Gas7,Epb4.1l3
GO:0051094	Positive regulation of developmental process	24	1533	0.37	0.0087	2.06048	10090.ENSMUSP00000022793,10090.ENSMUSP00000026436,10090.ENSMUSP00000027888,10090.ENSMUSP00000028062,10090.ENSMUSP00000032192,10090.ENSMUSP00000038613,10090.ENSMUSP00000040486,10090.ENSMUSP00000042271,10090.ENSMUSP00000068374,10090.ENSMUSP00000075167,10090.ENSMUSP00000076864,10090.ENSMUSP00000079689,10090.ENSMUSP00000097547,10090.ENSMUSP00000099652,10090.ENSMUSP00000102711,10090.ENSMUSP00000105867…	Acin1,Baiap2,Abl2,Vim,Itpr1,Jcad,Pak4,Spag9,Map1b,Abl1,Tfe3,Dab2,Fyn,Tjp1,Jun,Rreb1,Pak3,Itsn1,Add1,Kalrn,Tiam1,Zfp219,Mef2c,Clasp1
GO:0031324	Negative regulation of cellular metabolic process	33	2497	0.3	0.0094	2.02687	10090.ENSMUSP00000006037,10090.ENSMUSP00000009699,10090.ENSMUSP00000022793,10090.ENSMUSP00000023467,10090.ENSMUSP00000023741,10090.ENSMUSP00000025751,10090.ENSMUSP00000028499,10090.ENSMUSP00000033136,10090.ENSMUSP00000034717,10090.ENSMUSP00000040486,10090.ENSMUSP00000041070,10090.ENSMUSP00000048119,10090.ENSMUSP00000051959,10090.ENSMUSP00000061234,10090.ENSMUSP00000065275,10090.ENSMUSP00000068940…	Ncoa2,Cdk9,Acin1,Pak2,Kmt2d,Ighmbp2,Itgav,Bag3,Kank2,Pak4,Irf2bpl,Ptpn13,Rasd1,Irf2bp1,Cast,Abcd2,Abl1,Dapk1,Dab2,Uri1,Chd8,Fyn,Vdac1,Jun,Rreb1,Oxr1,Cbx5,Whsc1l1,Fam129a,Camsap3,Zfp219,Mef2c,Rhox5
GO:0031346	Positive regulation of cell projection organization	12	474	0.58	0.0094	2.02687	10090.ENSMUSP00000026436,10090.ENSMUSP00000027888,10090.ENSMUSP00000031695,10090.ENSMUSP00000032192,10090.ENSMUSP00000068374,10090.ENSMUSP00000091435,10090.ENSMUSP00000097547,10090.ENSMUSP00000105867,10090.ENSMUSP00000108485,10090.ENSMUSP00000109635,10090.ENSMUSP00000110611,10090.ENSMUSP00000126020	Baiap2,Abl2,Wasl,Itpr1,Map1b,Sept9,Fyn,Rreb1,Pak3,Itsn1,Kalrn,Tiam1
GO:0032535	Regulation of cellular component size	11	402	0.61	0.0094	2.02687	10090.ENSMUSP00000021689,10090.ENSMUSP00000026436,10090.ENSMUSP00000031695,10090.ENSMUSP00000032754,10090.ENSMUSP00000068374,10090.ENSMUSP00000075167,10090.ENSMUSP00000099902,10090.ENSMUSP00000108485,10090.ENSMUSP00000109979,10090.ENSMUSP00000124312,10090.ENSMUSP00000138839	Evl,Baiap2,Wasl,Sema4b,Map1b,Abl1,Sptbn1,Pak3,Add1,Ssh1,Wnk3
GO:0060020	Bergmann glial cell differentiation	3	11	1.61	0.0094	2.02687	10090.ENSMUSP00000027888,10090.ENSMUSP00000028062,10090.ENSMUSP00000075167	Abl2,Vim,Abl1
GO:1902531	Regulation of intracellular signal transduction	24	1556	0.36	0.0104	1.98297	10090.ENSMUSP00000024709,10090.ENSMUSP00000027888,10090.ENSMUSP00000029766,10090.ENSMUSP00000032192,10090.ENSMUSP00000033131,10090.ENSMUSP00000034717,10090.ENSMUSP00000038613,10090.ENSMUSP00000042271,10090.ENSMUSP00000048119,10090.ENSMUSP00000075167,10090.ENSMUSP00000079689,10090.ENSMUSP00000082646,10090.ENSMUSP00000084041,10090.ENSMUSP00000097547,10090.ENSMUSP00000102711,10090.ENSMUSP00000106746…	Cd2ap,Abl2,Bcar3,Itpr1,Lamtor1,Kank2,Jcad,Spag9,Ptpn13,Abl1,Dab2,Uri1,Pkd2,Fyn,Jun,Cdc42bpa,Pak3,Itsn1,Kalrn,Mapkap1,Tnik,Tiam1,Myo9b,Mef2c
GO:0045216	Cell-cell junction organization	7	157	0.83	0.0105	1.97881	10090.ENSMUSP00000001279,10090.ENSMUSP00000023467,10090.ENSMUSP00000039707,10090.ENSMUSP00000064518,10090.ENSMUSP00000099652,10090.ENSMUSP00000108300,10090.ENSMUSP00000125993	Lsr,Pak2,Micall2,Ctnnd1,Tjp1,Epb4.1l3,Camsap3
GO:0007417	Central nervous system development	18	984	0.44	0.0107	1.97062	10090.ENSMUSP00000001279,10090.ENSMUSP00000020188,10090.ENSMUSP00000025751,10090.ENSMUSP00000026436,10090.ENSMUSP00000027888,10090.ENSMUSP00000028062,10090.ENSMUSP00000030286,10090.ENSMUSP00000033136,10090.ENSMUSP00000040486,10090.ENSMUSP00000047697,10090.ENSMUSP00000075167,10090.ENSMUSP00000084041,10090.ENSMUSP00000086366,10090.ENSMUSP00000087184,10090.ENSMUSP00000087714,10090.ENSMUSP00000091061…	Lsr,Ifngr1,Ighmbp2,Baiap2,Abl2,Vim,Dock7,Bag3,Pak4,Syne2,Abl1,Pkd2,Smarca1,Chd8,Trio,Nefh,Fyn,Itsn1
GO:0050807	Regulation of synapse organization	9	275	0.69	0.011	1.95861	10090.ENSMUSP00000026436,10090.ENSMUSP00000075167,10090.ENSMUSP00000097547,10090.ENSMUSP00000108485,10090.ENSMUSP00000109635,10090.ENSMUSP00000110611,10090.ENSMUSP00000124312,10090.ENSMUSP00000126020,10090.ENSMUSP00000132547	Baiap2,Abl1,Fyn,Pak3,Itsn1,Kalrn,Ssh1,Tiam1,Mef2c
GO:0051056	Regulation of small gtpase mediated signal transduction	8	214	0.75	0.011	1.95861	10090.ENSMUSP00000024709,10090.ENSMUSP00000027888,10090.ENSMUSP00000034717,10090.ENSMUSP00000075167,10090.ENSMUSP00000106746,10090.ENSMUSP00000110611,10090.ENSMUSP00000116494,10090.ENSMUSP00000129220	Cd2ap,Abl2,Kank2,Abl1,Cdc42bpa,Kalrn,Mapkap1,Myo9b
GO:0022607	Cellular component assembly	28	1983	0.33	0.0113	1.94692	10090.ENSMUSP00000001279,10090.ENSMUSP00000020315,10090.ENSMUSP00000021689,10090.ENSMUSP00000023467,10090.ENSMUSP00000023538,10090.ENSMUSP00000026436,10090.ENSMUSP00000027888,10090.ENSMUSP00000028499,10090.ENSMUSP00000031695,10090.ENSMUSP00000033030,10090.ENSMUSP00000033136,10090.ENSMUSP00000039707,10090.ENSMUSP00000064518,10090.ENSMUSP00000068374,10090.ENSMUSP00000075167,10090.ENSMUSP00000078336…	Lsr,Cand1,Evl,Pak2,Mylk,Baiap2,Abl2,Itgav,Wasl,Parva,Bag3,Micall2,Ctnnd1,Map1b,Abl1,Ablim1,Dab2,Pkd2,Smarca1,Nefh,Sptbn1,Gas7,Epb4.1l3,Add1,Arid1b,Tnik,Tiam1,Clasp1
GO:0033036	Macromolecule localization	30	2198	0.31	0.0113	1.94692	10090.ENSMUSP00000001279,10090.ENSMUSP00000026436,10090.ENSMUSP00000027888,10090.ENSMUSP00000030760,10090.ENSMUSP00000031695,10090.ENSMUSP00000033131,10090.ENSMUSP00000036065,10090.ENSMUSP00000044272,10090.ENSMUSP00000047697,10090.ENSMUSP00000050275,10090.ENSMUSP00000054745,10090.ENSMUSP00000074837,10090.ENSMUSP00000075167,10090.ENSMUSP00000079689,10090.ENSMUSP00000080685,10090.ENSMUSP00000084041…	Lsr,Baiap2,Abl2,Necap2,Wasl,Lamtor1,Reep2,Sept14,Syne2,Gas2l1,Plekhf2,Pard3b,Abl1,Dab2,Dennd4c,Pkd2,Sept9,Rhbdf2,Tjp1,Sptbn1,Frmpd1,Epb4.1l3,Itsn1,Kalrn,Map7,Tnik,Camsap3,Tiam1,Pnpla2,Wnk3
GO:0006915	Apoptotic process	16	825	0.46	0.0134	1.8729	10090.ENSMUSP00000022793,10090.ENSMUSP00000023467,10090.ENSMUSP00000028499,10090.ENSMUSP00000032192,10090.ENSMUSP00000033136,10090.ENSMUSP00000034717,10090.ENSMUSP00000040486,10090.ENSMUSP00000075167,10090.ENSMUSP00000076666,10090.ENSMUSP00000079689,10090.ENSMUSP00000099819,10090.ENSMUSP00000102711,10090.ENSMUSP00000105926,10090.ENSMUSP00000108300,10090.ENSMUSP00000126020,10090.ENSMUSP00000132547	Acin1,Pak2,Itgav,Itpr1,Bag3,Kank2,Pak4,Abl1,Dapk1,Dab2,Vdac1,Jun,Oxr1,Epb4.1l3,Tiam1,Mef2c
GO:0007409	Axonogenesis	10	351	0.63	0.0135	1.86967	10090.ENSMUSP00000021689,10090.ENSMUSP00000030286,10090.ENSMUSP00000032754,10090.ENSMUSP00000068374,10090.ENSMUSP00000075167,10090.ENSMUSP00000078336,10090.ENSMUSP00000087714,10090.ENSMUSP00000091061,10090.ENSMUSP00000108485,10090.ENSMUSP00000110611	Evl,Dock7,Sema4b,Map1b,Abl1,Ablim1,Trio,Nefh,Pak3,Kalrn
GO:0030833	Regulation of actin filament polymerization	7	165	0.8	0.0135	1.86967	10090.ENSMUSP00000021689,10090.ENSMUSP00000026436,10090.ENSMUSP00000031695,10090.ENSMUSP00000099902,10090.ENSMUSP00000108485,10090.ENSMUSP00000109979,10090.ENSMUSP00000124312	Evl,Baiap2,Wasl,Sptbn1,Pak3,Add1,Ssh1
GO:0043547	Positive regulation of gtpase activity	10	355	0.63	0.0146	1.83565	10090.ENSMUSP00000023487,10090.ENSMUSP00000029766,10090.ENSMUSP00000030286,10090.ENSMUSP00000065633,10090.ENSMUSP00000102711,10090.ENSMUSP00000109104,10090.ENSMUSP00000110611,10090.ENSMUSP00000126020,10090.ENSMUSP00000129220,10090.ENSMUSP00000133898	Arhgap31,Bcar3,Dock7,Arhgap20,Jun,Rasgrp2,Kalrn,Tiam1,Myo9b,Arhgap32
GO:0048813	Dendrite morphogenesis	5	73	1.01	0.015	1.82391	10090.ENSMUSP00000027888,10090.ENSMUSP00000031695,10090.ENSMUSP00000097547,10090.ENSMUSP00000108485,10090.ENSMUSP00000118491	Abl2,Wasl,Fyn,Pak3,Abi1
GO:0071470	Cellular response to osmotic stress	4	38	1.2	0.015	1.82391	10090.ENSMUSP00000023538,10090.ENSMUSP00000043724,10090.ENSMUSP00000084041,10090.ENSMUSP00000138839	Mylk,Rcsd1,Pkd2,Wnk3
GO:2000249	Regulation of actin cytoskeleton reorganization	4	38	1.2	0.015	1.82391	10090.ENSMUSP00000024709,10090.ENSMUSP00000026436,10090.ENSMUSP00000075167,10090.ENSMUSP00000099652	Cd2ap,Baiap2,Abl1,Tjp1
GO:1901701	Cellular response to oxygen-containing compound	18	1026	0.42	0.0166	1.77989	10090.ENSMUSP00000026436,10090.ENSMUSP00000027888,10090.ENSMUSP00000028062,10090.ENSMUSP00000029766,10090.ENSMUSP00000032192,10090.ENSMUSP00000033131,10090.ENSMUSP00000068374,10090.ENSMUSP00000075167,10090.ENSMUSP00000076666,10090.ENSMUSP00000080685,10090.ENSMUSP00000084041,10090.ENSMUSP00000097547,10090.ENSMUSP00000099652,10090.ENSMUSP00000102711,10090.ENSMUSP00000105926,10090.ENSMUSP00000109979…	Baiap2,Abl2,Vim,Bcar3,Itpr1,Lamtor1,Map1b,Abl1,Dapk1,Dennd4c,Pkd2,Fyn,Tjp1,Jun,Oxr1,Add1,Ssh1,Mef2c
GO:0009890	Negative regulation of biosynthetic process	23	1517	0.36	0.0173	1.76195	10090.ENSMUSP00000006037,10090.ENSMUSP00000023741,10090.ENSMUSP00000025751,10090.ENSMUSP00000028499,10090.ENSMUSP00000033136,10090.ENSMUSP00000034717,10090.ENSMUSP00000040486,10090.ENSMUSP00000041070,10090.ENSMUSP00000051959,10090.ENSMUSP00000061234,10090.ENSMUSP00000068940,10090.ENSMUSP00000076666,10090.ENSMUSP00000079689,10090.ENSMUSP00000082646,10090.ENSMUSP00000087184,10090.ENSMUSP00000097547…	Ncoa2,Kmt2d,Ighmbp2,Itgav,Bag3,Kank2,Pak4,Irf2bpl,Rasd1,Irf2bp1,Abcd2,Dapk1,Dab2,Uri1,Chd8,Fyn,Jun,Rreb1,Cbx5,Whsc1l1,Zfp219,Mef2c,Rhox5
GO:0010632	Regulation of epithelial cell migration	8	232	0.71	0.0174	1.75945	10090.ENSMUSP00000004622,10090.ENSMUSP00000021689,10090.ENSMUSP00000038613,10090.ENSMUSP00000075167,10090.ENSMUSP00000102711,10090.ENSMUSP00000105867,10090.ENSMUSP00000132547,10090.ENSMUSP00000140019	Gab2,Evl,Jcad,Abl1,Jun,Rreb1,Mef2c,Clasp1
GO:0031098	Stress-activated protein kinase signaling cascade	6	121	0.87	0.0174	1.75945	10090.ENSMUSP00000023467,10090.ENSMUSP00000040486,10090.ENSMUSP00000042271,10090.ENSMUSP00000079689,10090.ENSMUSP00000108485,10090.ENSMUSP00000125081	Pak2,Pak4,Spag9,Dab2,Pak3,Tnik
GO:0031328	Positive regulation of cellular biosynthetic process	27	1940	0.32	0.0179	1.74715	10090.ENSMUSP00000006037,10090.ENSMUSP00000009699,10090.ENSMUSP00000020315,10090.ENSMUSP00000023741,10090.ENSMUSP00000028062,10090.ENSMUSP00000029766,10090.ENSMUSP00000031695,10090.ENSMUSP00000038964,10090.ENSMUSP00000041070,10090.ENSMUSP00000068940,10090.ENSMUSP00000069257,10090.ENSMUSP00000076864,10090.ENSMUSP00000078336,10090.ENSMUSP00000079689,10090.ENSMUSP00000084041,10090.ENSMUSP00000086366…	Ncoa2,Cdk9,Cand1,Kmt2d,Vim,Bcar3,Wasl,Rbm3,Irf2bpl,Abcd2,Ppp1r12a,Tfe3,Ablim1,Dab2,Pkd2,Smarca1,Chd8,Jun,Mavs,Rreb1,Pbrm1,Pak3,Arid1b,Whsc1l1,Fam129a,Zfp219,Mef2c
GO:0010557	Positive regulation of macromolecule biosynthetic process	26	1837	0.33	0.0183	1.73755	10090.ENSMUSP00000006037,10090.ENSMUSP00000009699,10090.ENSMUSP00000020315,10090.ENSMUSP00000023741,10090.ENSMUSP00000028062,10090.ENSMUSP00000029766,10090.ENSMUSP00000031695,10090.ENSMUSP00000038964,10090.ENSMUSP00000041070,10090.ENSMUSP00000069257,10090.ENSMUSP00000076864,10090.ENSMUSP00000078336,10090.ENSMUSP00000079689,10090.ENSMUSP00000084041,10090.ENSMUSP00000086366,10090.ENSMUSP00000087184…	Ncoa2,Cdk9,Cand1,Kmt2d,Vim,Bcar3,Wasl,Rbm3,Irf2bpl,Ppp1r12a,Tfe3,Ablim1,Dab2,Pkd2,Smarca1,Chd8,Jun,Mavs,Rreb1,Pbrm1,Pak3,Arid1b,Whsc1l1,Fam129a,Zfp219,Mef2c
GO:0050767	Regulation of neurogenesis	17	948	0.43	0.0191	1.71897	10090.ENSMUSP00000026436,10090.ENSMUSP00000027888,10090.ENSMUSP00000028062,10090.ENSMUSP00000030286,10090.ENSMUSP00000032192,10090.ENSMUSP00000032754,10090.ENSMUSP00000042271,10090.ENSMUSP00000068374,10090.ENSMUSP00000075167,10090.ENSMUSP00000079689,10090.ENSMUSP00000097547,10090.ENSMUSP00000108485,10090.ENSMUSP00000109635,10090.ENSMUSP00000110611,10090.ENSMUSP00000125081,10090.ENSMUSP00000126020…	Baiap2,Abl2,Vim,Dock7,Itpr1,Sema4b,Spag9,Map1b,Abl1,Dab2,Fyn,Pak3,Itsn1,Kalrn,Tnik,Tiam1,Mef2c
GO:0050808	Synapse organization	9	303	0.65	0.0201	1.6968	10090.ENSMUSP00000026436,10090.ENSMUSP00000027888,10090.ENSMUSP00000031695,10090.ENSMUSP00000068374,10090.ENSMUSP00000087511,10090.ENSMUSP00000091061,10090.ENSMUSP00000107250,10090.ENSMUSP00000108485,10090.ENSMUSP00000110611	Baiap2,Abl2,Wasl,Map1b,Sybu,Nefh,Ppfibp1,Pak3,Kalrn
GO:0009967	Positive regulation of signal transduction	23	1538	0.35	0.0203	1.6925	10090.ENSMUSP00000006037,10090.ENSMUSP00000020188,10090.ENSMUSP00000023467,10090.ENSMUSP00000023741,10090.ENSMUSP00000026436,10090.ENSMUSP00000027131,10090.ENSMUSP00000027888,10090.ENSMUSP00000029766,10090.ENSMUSP00000033131,10090.ENSMUSP00000038613,10090.ENSMUSP00000042271,10090.ENSMUSP00000075167,10090.ENSMUSP00000079689,10090.ENSMUSP00000084041,10090.ENSMUSP00000097547,10090.ENSMUSP00000102711…	Ncoa2,Ifngr1,Pak2,Kmt2d,Baiap2,Slc39a10,Abl2,Bcar3,Lamtor1,Jcad,Spag9,Abl1,Dab2,Pkd2,Fyn,Jun,Mavs,Pak3,Itsn1,Ssh1,Tnik,Tiam1,Mef2c
GO:0035633	Maintenance of blood-brain barrier	3	16	1.45	0.0211	1.67572	10090.ENSMUSP00000097154,10090.ENSMUSP00000099652,10090.ENSMUSP00000138839	Tjp2,Tjp1,Wnk3
GO:0035026	Leading edge cell differentiation	2	2	2.18	0.0212	1.67366	10090.ENSMUSP00000079689,10090.ENSMUSP00000102711	Dab2,Jun
GO:0043410	Positive regulation of mapk cascade	12	531	0.53	0.0221	1.65561	10090.ENSMUSP00000027888,10090.ENSMUSP00000029766,10090.ENSMUSP00000033131,10090.ENSMUSP00000038613,10090.ENSMUSP00000042271,10090.ENSMUSP00000075167,10090.ENSMUSP00000079689,10090.ENSMUSP00000102711,10090.ENSMUSP00000108485,10090.ENSMUSP00000125081,10090.ENSMUSP00000126020,10090.ENSMUSP00000132547	Abl2,Bcar3,Lamtor1,Jcad,Spag9,Abl1,Dab2,Jun,Pak3,Tnik,Tiam1,Mef2c
GO:0043044	ATP-dependent chromatin remodeling	4	44	1.13	0.023	1.63827	10090.ENSMUSP00000086366,10090.ENSMUSP00000087184,10090.ENSMUSP00000107727,10090.ENSMUSP00000111463	Smarca1,Chd8,Pbrm1,Arid1b
GO:0051172	Negative regulation of nitrogen compound metabolic process	30	2310	0.29	0.0234	1.63078	10090.ENSMUSP00000006037,10090.ENSMUSP00000009699,10090.ENSMUSP00000022793,10090.ENSMUSP00000023467,10090.ENSMUSP00000023741,10090.ENSMUSP00000025751,10090.ENSMUSP00000028499,10090.ENSMUSP00000033136,10090.ENSMUSP00000034717,10090.ENSMUSP00000040486,10090.ENSMUSP00000041070,10090.ENSMUSP00000048119,10090.ENSMUSP00000051959,10090.ENSMUSP00000061234,10090.ENSMUSP00000065275,10090.ENSMUSP00000075167…	Ncoa2,Cdk9,Acin1,Pak2,Kmt2d,Ighmbp2,Itgav,Bag3,Kank2,Pak4,Irf2bpl,Ptpn13,Rasd1,Irf2bp1,Cast,Abl1,Dapk1,Dab2,Uri1,Chd8,Fyn,Jun,Rreb1,Oxr1,Cbx5,Whsc1l1,Fam129a,Zfp219,Mef2c,Rhox5
GO:0099175	Regulation of postsynapse organization	6	130	0.84	0.0235	1.62893	10090.ENSMUSP00000026436,10090.ENSMUSP00000097547,10090.ENSMUSP00000108485,10090.ENSMUSP00000110611,10090.ENSMUSP00000124312,10090.ENSMUSP00000126020	Baiap2,Fyn,Pak3,Kalrn,Ssh1,Tiam1
GO:0006970	Response to osmotic stress	5	83	0.96	0.0238	1.62342	10090.ENSMUSP00000023538,10090.ENSMUSP00000043724,10090.ENSMUSP00000084041,10090.ENSMUSP00000111963,10090.ENSMUSP00000138839	Mylk,Rcsd1,Pkd2,Map7,Wnk3
GO:0106027	Neuron projection organization	4	45	1.12	0.0244	1.61261	10090.ENSMUSP00000027888,10090.ENSMUSP00000031695,10090.ENSMUSP00000068940,10090.ENSMUSP00000108485	Abl2,Wasl,Abcd2,Pak3
GO:0032880	Regulation of protein localization	17	978	0.42	0.0255	1.59346	10090.ENSMUSP00000024709,10090.ENSMUSP00000031695,10090.ENSMUSP00000033136,10090.ENSMUSP00000055122,10090.ENSMUSP00000075172,10090.ENSMUSP00000079689,10090.ENSMUSP00000087511,10090.ENSMUSP00000097547,10090.ENSMUSP00000099317,10090.ENSMUSP00000099902,10090.ENSMUSP00000105828,10090.ENSMUSP00000110611,10090.ENSMUSP00000120115,10090.ENSMUSP00000124312,10090.ENSMUSP00000125081,10090.ENSMUSP00000126020…	Cd2ap,Wasl,Bag3,Epb4.1l2,Frmd4a,Dab2,Sybu,Fyn,Rhbdf2,Sptbn1,Mavs,Kalrn,Hnrnpm,Ssh1,Tnik,Tiam1,Wnk3
GO:0045666	Positive regulation of neuron differentiation	11	465	0.55	0.0264	1.5784	10090.ENSMUSP00000026436,10090.ENSMUSP00000027888,10090.ENSMUSP00000032192,10090.ENSMUSP00000042271,10090.ENSMUSP00000068374,10090.ENSMUSP00000097547,10090.ENSMUSP00000108485,10090.ENSMUSP00000109635,10090.ENSMUSP00000110611,10090.ENSMUSP00000126020,10090.ENSMUSP00000132547	Baiap2,Abl2,Itpr1,Spag9,Map1b,Fyn,Pak3,Itsn1,Kalrn,Tiam1,Mef2c
GO:0051640	Organelle localization	11	465	0.55	0.0264	1.5784	10090.ENSMUSP00000030286,10090.ENSMUSP00000031695,10090.ENSMUSP00000033131,10090.ENSMUSP00000035055,10090.ENSMUSP00000042271,10090.ENSMUSP00000047697,10090.ENSMUSP00000068374,10090.ENSMUSP00000074837,10090.ENSMUSP00000087511,10090.ENSMUSP00000106746,10090.ENSMUSP00000140019	Dock7,Wasl,Lamtor1,Map4,Spag9,Syne2,Map1b,Pard3b,Sybu,Cdc42bpa,Clasp1
GO:0030048	Actin filament-based movement	5	86	0.94	0.027	1.56864	10090.ENSMUSP00000021689,10090.ENSMUSP00000031695,10090.ENSMUSP00000033030,10090.ENSMUSP00000047697,10090.ENSMUSP00000129220	Evl,Wasl,Parva,Syne2,Myo9b
GO:0006357	Regulation of transcription by rna polymerase ii	26	1897	0.31	0.0274	1.56225	10090.ENSMUSP00000006037,10090.ENSMUSP00000009699,10090.ENSMUSP00000020315,10090.ENSMUSP00000023741,10090.ENSMUSP00000025751,10090.ENSMUSP00000031695,10090.ENSMUSP00000033136,10090.ENSMUSP00000034717,10090.ENSMUSP00000041070,10090.ENSMUSP00000061234,10090.ENSMUSP00000069257,10090.ENSMUSP00000076864,10090.ENSMUSP00000078336,10090.ENSMUSP00000079689,10090.ENSMUSP00000082646,10090.ENSMUSP00000084041…	Ncoa2,Cdk9,Cand1,Kmt2d,Ighmbp2,Wasl,Bag3,Kank2,Irf2bpl,Irf2bp1,Ppp1r12a,Tfe3,Ablim1,Dab2,Uri1,Pkd2,Smarca1,Chd8,Jun,Mavs,Rreb1,Arid1b,Cbx5,Zfp219,Mef2c,Rhox5
GO:0035023	Regulation of rho protein signal transduction	5	87	0.94	0.0282	1.54975	10090.ENSMUSP00000027888,10090.ENSMUSP00000034717,10090.ENSMUSP00000075167,10090.ENSMUSP00000110611,10090.ENSMUSP00000129220	Abl2,Kank2,Abl1,Kalrn,Myo9b
GO:1903829	Positive regulation of cellular protein localization	9	322	0.62	0.0283	1.54821	10090.ENSMUSP00000024709,10090.ENSMUSP00000033136,10090.ENSMUSP00000055122,10090.ENSMUSP00000097547,10090.ENSMUSP00000099902,10090.ENSMUSP00000105828,10090.ENSMUSP00000120115,10090.ENSMUSP00000124312,10090.ENSMUSP00000138839	Cd2ap,Bag3,Epb4.1l2,Fyn,Sptbn1,Mavs,Hnrnpm,Ssh1,Wnk3
GO:0040011	Locomotion	19	1183	0.38	0.0288	1.54061	10090.ENSMUSP00000004622,10090.ENSMUSP00000020695,10090.ENSMUSP00000021689,10090.ENSMUSP00000024709,10090.ENSMUSP00000027888,10090.ENSMUSP00000028499,10090.ENSMUSP00000032754,10090.ENSMUSP00000033030,10090.ENSMUSP00000034717,10090.ENSMUSP00000047697,10090.ENSMUSP00000075167,10090.ENSMUSP00000078336,10090.ENSMUSP00000087714,10090.ENSMUSP00000097547,10090.ENSMUSP00000106746,10090.ENSMUSP00000126020…	Gab2,Tns3,Evl,Cd2ap,Abl2,Itgav,Sema4b,Parva,Kank2,Syne2,Abl1,Ablim1,Trio,Fyn,Cdc42bpa,Tiam1,Myo9b,Mef2c,Rhox5
GO:0050773	Regulation of dendrite development	7	193	0.74	0.0288	1.54061	10090.ENSMUSP00000026436,10090.ENSMUSP00000108485,10090.ENSMUSP00000109635,10090.ENSMUSP00000110611,10090.ENSMUSP00000125081,10090.ENSMUSP00000126020,10090.ENSMUSP00000132547	Baiap2,Pak3,Itsn1,Kalrn,Tnik,Tiam1,Mef2c
GO:0051656	Establishment of organelle localization	9	324	0.62	0.0291	1.53611	10090.ENSMUSP00000030286,10090.ENSMUSP00000031695,10090.ENSMUSP00000035055,10090.ENSMUSP00000047697,10090.ENSMUSP00000068374,10090.ENSMUSP00000074837,10090.ENSMUSP00000087511,10090.ENSMUSP00000106746,10090.ENSMUSP00000140019	Dock7,Wasl,Map4,Syne2,Map1b,Pard3b,Sybu,Cdc42bpa,Clasp1
GO:1900182	Positive regulation of protein localization to nucleus	5	88	0.93	0.0291	1.53611	10090.ENSMUSP00000024709,10090.ENSMUSP00000033136,10090.ENSMUSP00000097547,10090.ENSMUSP00000105828,10090.ENSMUSP00000120115	Cd2ap,Bag3,Fyn,Mavs,Hnrnpm
GO:0010035	Response to inorganic substance	12	556	0.51	0.0306	1.51428	10090.ENSMUSP00000023538,10090.ENSMUSP00000028499,10090.ENSMUSP00000068374,10090.ENSMUSP00000075167,10090.ENSMUSP00000084041,10090.ENSMUSP00000091061,10090.ENSMUSP00000097547,10090.ENSMUSP00000101500,10090.ENSMUSP00000102711,10090.ENSMUSP00000109104,10090.ENSMUSP00000109979,10090.ENSMUSP00000132547	Mylk,Itgav,Map1b,Abl1,Pkd2,Nefh,Fyn,Slc30a2,Jun,Rasgrp2,Add1,Mef2c
GO:0060025	Regulation of synaptic activity	2	3	2	0.0319	1.49621	10090.ENSMUSP00000087511,10090.ENSMUSP00000132547	Sybu,Mef2c
GO:1904375	Regulation of protein localization to cell periphery	6	141	0.8	0.0331	1.48017	10090.ENSMUSP00000055122,10090.ENSMUSP00000079689,10090.ENSMUSP00000099902,10090.ENSMUSP00000110611,10090.ENSMUSP00000125081,10090.ENSMUSP00000138839	Epb4.1l2,Dab2,Sptbn1,Kalrn,Tnik,Wnk3
GO:0034446	Substrate adhesion-dependent cell spreading	4	50	1.08	0.0332	1.47886	10090.ENSMUSP00000028499,10090.ENSMUSP00000033030,10090.ENSMUSP00000039707,10090.ENSMUSP00000075167	Itgav,Parva,Micall2,Abl1
GO:1905475	Regulation of protein localization to membrane	7	199	0.72	0.0334	1.47625	10090.ENSMUSP00000079689,10090.ENSMUSP00000097547,10090.ENSMUSP00000099902,10090.ENSMUSP00000110611,10090.ENSMUSP00000124312,10090.ENSMUSP00000125081,10090.ENSMUSP00000138839	Dab2,Fyn,Sptbn1,Kalrn,Ssh1,Tnik,Wnk3
GO:0043067	Regulation of programmed cell death	22	1510	0.34	0.0351	1.45469	10090.ENSMUSP00000022793,10090.ENSMUSP00000023467,10090.ENSMUSP00000027131,10090.ENSMUSP00000027888,10090.ENSMUSP00000028499,10090.ENSMUSP00000032192,10090.ENSMUSP00000033136,10090.ENSMUSP00000034717,10090.ENSMUSP00000040486,10090.ENSMUSP00000065275,10090.ENSMUSP00000075167,10090.ENSMUSP00000076666,10090.ENSMUSP00000079689,10090.ENSMUSP00000082646,10090.ENSMUSP00000087184,10090.ENSMUSP00000097547…	Acin1,Pak2,Slc39a10,Abl2,Itgav,Itpr1,Bag3,Kank2,Pak4,Cast,Abl1,Dapk1,Dab2,Uri1,Chd8,Fyn,Jun,Oxr1,Pak3,Itsn1,Mef2c,Wnk3
GO:1904036	Negative regulation of epithelial cell apoptotic process	4	51	1.07	0.0352	1.45346	10090.ENSMUSP00000027888,10090.ENSMUSP00000040486,10090.ENSMUSP00000065275,10090.ENSMUSP00000075167	Abl2,Pak4,Cast,Abl1
GO:0007009	Plasma membrane organization	5	93	0.91	0.0354	1.451	10090.ENSMUSP00000026436,10090.ENSMUSP00000031695,10090.ENSMUSP00000068940,10090.ENSMUSP00000099902,10090.ENSMUSP00000108300	Baiap2,Wasl,Abcd2,Sptbn1,Epb4.1l3
GO:0010628	Positive regulation of gene expression	29	2269	0.28	0.0354	1.451	10090.ENSMUSP00000006037,10090.ENSMUSP00000009699,10090.ENSMUSP00000020188,10090.ENSMUSP00000020315,10090.ENSMUSP00000023741,10090.ENSMUSP00000027888,10090.ENSMUSP00000028062,10090.ENSMUSP00000031695,10090.ENSMUSP00000038964,10090.ENSMUSP00000041070,10090.ENSMUSP00000064518,10090.ENSMUSP00000069257,10090.ENSMUSP00000075167,10090.ENSMUSP00000076864,10090.ENSMUSP00000078336,10090.ENSMUSP00000079689…	Ncoa2,Cdk9,Ifngr1,Cand1,Kmt2d,Abl2,Vim,Wasl,Rbm3,Irf2bpl,Ctnnd1,Ppp1r12a,Abl1,Tfe3,Ablim1,Dab2,Pkd2,Smarca1,Chd8,Sptbn1,Jun,Mavs,Rreb1,Pbrm1,Arid1b,Whsc1l1,Fam129a,Zfp219,Mef2c
GO:0051253	Negative regulation of rna metabolic process	20	1308	0.36	0.0354	1.451	10090.ENSMUSP00000006037,10090.ENSMUSP00000009699,10090.ENSMUSP00000022793,10090.ENSMUSP00000023741,10090.ENSMUSP00000025751,10090.ENSMUSP00000033136,10090.ENSMUSP00000034717,10090.ENSMUSP00000041070,10090.ENSMUSP00000051959,10090.ENSMUSP00000061234,10090.ENSMUSP00000079689,10090.ENSMUSP00000082646,10090.ENSMUSP00000087184,10090.ENSMUSP00000102711,10090.ENSMUSP00000105867,10090.ENSMUSP00000113157…	Ncoa2,Cdk9,Acin1,Kmt2d,Ighmbp2,Bag3,Kank2,Irf2bpl,Rasd1,Irf2bp1,Dab2,Uri1,Chd8,Jun,Rreb1,Cbx5,Whsc1l1,Zfp219,Mef2c,Rhox5
GO:0033674	Positive regulation of kinase activity	12	570	0.5	0.0364	1.4389	10090.ENSMUSP00000023467,10090.ENSMUSP00000040486,10090.ENSMUSP00000042271,10090.ENSMUSP00000075167,10090.ENSMUSP00000079689,10090.ENSMUSP00000084041,10090.ENSMUSP00000108485,10090.ENSMUSP00000109635,10090.ENSMUSP00000118491,10090.ENSMUSP00000125081,10090.ENSMUSP00000126020,10090.ENSMUSP00000132547	Pak2,Pak4,Spag9,Abl1,Dab2,Pkd2,Pak3,Itsn1,Abi1,Tnik,Tiam1,Mef2c
GO:0010558	Negative regulation of macromolecule biosynthetic process	21	1419	0.35	0.0381	1.41908	10090.ENSMUSP00000006037,10090.ENSMUSP00000023741,10090.ENSMUSP00000025751,10090.ENSMUSP00000028499,10090.ENSMUSP00000033136,10090.ENSMUSP00000034717,10090.ENSMUSP00000040486,10090.ENSMUSP00000041070,10090.ENSMUSP00000051959,10090.ENSMUSP00000061234,10090.ENSMUSP00000076666,10090.ENSMUSP00000079689,10090.ENSMUSP00000082646,10090.ENSMUSP00000087184,10090.ENSMUSP00000102711,10090.ENSMUSP00000105867…	Ncoa2,Kmt2d,Ighmbp2,Itgav,Bag3,Kank2,Pak4,Irf2bpl,Rasd1,Irf2bp1,Dapk1,Dab2,Uri1,Chd8,Jun,Rreb1,Cbx5,Whsc1l1,Zfp219,Mef2c,Rhox5
GO:1903827	Regulation of cellular protein localization	12	576	0.49	0.0396	1.4023	10090.ENSMUSP00000024709,10090.ENSMUSP00000033136,10090.ENSMUSP00000055122,10090.ENSMUSP00000079689,10090.ENSMUSP00000097547,10090.ENSMUSP00000099902,10090.ENSMUSP00000105828,10090.ENSMUSP00000110611,10090.ENSMUSP00000120115,10090.ENSMUSP00000124312,10090.ENSMUSP00000125081,10090.ENSMUSP00000138839	Cd2ap,Bag3,Epb4.1l2,Dab2,Fyn,Sptbn1,Mavs,Kalrn,Hnrnpm,Ssh1,Tnik,Wnk3
GO:0007166	Cell surface receptor signaling pathway	24	1741	0.32	0.0403	1.39469	10090.ENSMUSP00000004622,10090.ENSMUSP00000020188,10090.ENSMUSP00000027888,10090.ENSMUSP00000028062,10090.ENSMUSP00000028499,10090.ENSMUSP00000029766,10090.ENSMUSP00000032754,10090.ENSMUSP00000033136,10090.ENSMUSP00000042551,10090.ENSMUSP00000064518,10090.ENSMUSP00000075167,10090.ENSMUSP00000076666,10090.ENSMUSP00000079689,10090.ENSMUSP00000084041,10090.ENSMUSP00000087184,10090.ENSMUSP00000097154…	Gab2,Ifngr1,Abl2,Vim,Itgav,Bcar3,Sema4b,Bag3,Kif16b,Ctnnd1,Abl1,Dapk1,Dab2,Pkd2,Chd8,Tjp2,Fyn,Sptbn1,Jun,Kalrn,Tnik,Tiam1,Myo9b,Mef2c
GO:0045860	Positive regulation of protein kinase activity	11	496	0.52	0.0405	1.39254	10090.ENSMUSP00000023467,10090.ENSMUSP00000040486,10090.ENSMUSP00000042271,10090.ENSMUSP00000075167,10090.ENSMUSP00000079689,10090.ENSMUSP00000084041,10090.ENSMUSP00000108485,10090.ENSMUSP00000118491,10090.ENSMUSP00000125081,10090.ENSMUSP00000126020,10090.ENSMUSP00000132547	Pak2,Pak4,Spag9,Abl1,Dab2,Pkd2,Pak3,Abi1,Tnik,Tiam1,Mef2c
GO:0050769	Positive regulation of neurogenesis	12	579	0.49	0.0408	1.38934	10090.ENSMUSP00000026436,10090.ENSMUSP00000027888,10090.ENSMUSP00000028062,10090.ENSMUSP00000032192,10090.ENSMUSP00000042271,10090.ENSMUSP00000068374,10090.ENSMUSP00000097547,10090.ENSMUSP00000108485,10090.ENSMUSP00000109635,10090.ENSMUSP00000110611,10090.ENSMUSP00000126020,10090.ENSMUSP00000132547	Baiap2,Abl2,Vim,Itpr1,Spag9,Map1b,Fyn,Pak3,Itsn1,Kalrn,Tiam1,Mef2c
GO:0062197	Cellular response to chemical stress	8	273	0.64	0.0408	1.38934	10090.ENSMUSP00000023538,10090.ENSMUSP00000043724,10090.ENSMUSP00000075167,10090.ENSMUSP00000076666,10090.ENSMUSP00000084041,10090.ENSMUSP00000102711,10090.ENSMUSP00000105926,10090.ENSMUSP00000138839	Mylk,Rcsd1,Abl1,Dapk1,Pkd2,Jun,Oxr1,Wnk3
GO:0030837	Negative regulation of actin filament polymerization	4	54	1.05	0.0411	1.38616	10090.ENSMUSP00000021689,10090.ENSMUSP00000099902,10090.ENSMUSP00000109979,10090.ENSMUSP00000124312	Evl,Sptbn1,Add1,Ssh1
GO:1900449	Regulation of glutamate receptor signaling pathway	4	54	1.05	0.0411	1.38616	10090.ENSMUSP00000020188,10090.ENSMUSP00000076666,10090.ENSMUSP00000097547,10090.ENSMUSP00000132547	Ifngr1,Dapk1,Fyn,Mef2c
GO:0016477	Cell migration	15	845	0.43	0.0412	1.3851	10090.ENSMUSP00000004622,10090.ENSMUSP00000020695,10090.ENSMUSP00000024709,10090.ENSMUSP00000027888,10090.ENSMUSP00000028499,10090.ENSMUSP00000032754,10090.ENSMUSP00000033030,10090.ENSMUSP00000034717,10090.ENSMUSP00000047697,10090.ENSMUSP00000075167,10090.ENSMUSP00000097547,10090.ENSMUSP00000106746,10090.ENSMUSP00000126020,10090.ENSMUSP00000129220,10090.ENSMUSP00000132547	Gab2,Tns3,Cd2ap,Abl2,Itgav,Sema4b,Parva,Kank2,Syne2,Abl1,Fyn,Cdc42bpa,Tiam1,Myo9b,Mef2c
GO:0048584	Positive regulation of response to stimulus	27	2080	0.29	0.0428	1.36856	10090.ENSMUSP00000004622,10090.ENSMUSP00000006037,10090.ENSMUSP00000020188,10090.ENSMUSP00000023467,10090.ENSMUSP00000023538,10090.ENSMUSP00000023741,10090.ENSMUSP00000026436,10090.ENSMUSP00000027131,10090.ENSMUSP00000027888,10090.ENSMUSP00000029766,10090.ENSMUSP00000033131,10090.ENSMUSP00000038613,10090.ENSMUSP00000042271,10090.ENSMUSP00000075167,10090.ENSMUSP00000079689,10090.ENSMUSP00000084041…	Gab2,Ncoa2,Ifngr1,Pak2,Mylk,Kmt2d,Baiap2,Slc39a10,Abl2,Bcar3,Lamtor1,Jcad,Spag9,Abl1,Dab2,Pkd2,Sybu,Fyn,Jun,Mavs,Rreb1,Pak3,Itsn1,Ssh1,Tnik,Tiam1,Mef2c
GO:0031113	Regulation of microtubule polymerization	4	55	1.04	0.0432	1.36452	10090.ENSMUSP00000068374,10090.ENSMUSP00000075167,10090.ENSMUSP00000109804,10090.ENSMUSP00000125993	Map1b,Abl1,Camsap1,Camsap3
GO:0098989	NMDA selective glutamate receptor signaling pathway	2	4	1.88	0.0434	1.36251	10090.ENSMUSP00000110611,10090.ENSMUSP00000126020	Kalrn,Tiam1
GO:1905605	Positive regulation of blood-brain barrier permeability	2	4	1.88	0.0434	1.36251	10090.ENSMUSP00000097154,10090.ENSMUSP00000099652	Tjp2,Tjp1
GO:0010634	Positive regulation of epithelial cell migration	6	152	0.77	0.044	1.35655	10090.ENSMUSP00000004622,10090.ENSMUSP00000038613,10090.ENSMUSP00000075167,10090.ENSMUSP00000102711,10090.ENSMUSP00000105867,10090.ENSMUSP00000140019	Gab2,Jcad,Abl1,Jun,Rreb1,Clasp1
GO:0010647	Positive regulation of cell communication	24	1762	0.31	0.0449	1.34775	10090.ENSMUSP00000006037,10090.ENSMUSP00000020188,10090.ENSMUSP00000023467,10090.ENSMUSP00000023741,10090.ENSMUSP00000026436,10090.ENSMUSP00000027131,10090.ENSMUSP00000027888,10090.ENSMUSP00000029766,10090.ENSMUSP00000033131,10090.ENSMUSP00000038613,10090.ENSMUSP00000042271,10090.ENSMUSP00000075167,10090.ENSMUSP00000079689,10090.ENSMUSP00000084041,10090.ENSMUSP00000087511,10090.ENSMUSP00000097547…	Ncoa2,Ifngr1,Pak2,Kmt2d,Baiap2,Slc39a10,Abl2,Bcar3,Lamtor1,Jcad,Spag9,Abl1,Dab2,Pkd2,Sybu,Fyn,Jun,Mavs,Pak3,Itsn1,Ssh1,Tnik,Tiam1,Mef2c
GO:0072657	Protein localization to membrane	10	427	0.55	0.045	1.34679	10090.ENSMUSP00000036065,10090.ENSMUSP00000080685,10090.ENSMUSP00000099902,10090.ENSMUSP00000103434,10090.ENSMUSP00000108300,10090.ENSMUSP00000110611,10090.ENSMUSP00000111963,10090.ENSMUSP00000125081,10090.ENSMUSP00000126020,10090.ENSMUSP00000138839	Reep2,Dennd4c,Sptbn1,Frmpd1,Epb4.1l3,Kalrn,Map7,Tnik,Tiam1,Wnk3
GO:0010941	Regulation of cell death	23	1661	0.32	0.0465	1.33255	10090.ENSMUSP00000022793,10090.ENSMUSP00000023467,10090.ENSMUSP00000027131,10090.ENSMUSP00000027888,10090.ENSMUSP00000028499,10090.ENSMUSP00000032192,10090.ENSMUSP00000033136,10090.ENSMUSP00000034717,10090.ENSMUSP00000040486,10090.ENSMUSP00000065275,10090.ENSMUSP00000075167,10090.ENSMUSP00000076666,10090.ENSMUSP00000079689,10090.ENSMUSP00000082646,10090.ENSMUSP00000087184,10090.ENSMUSP00000097547…	Acin1,Pak2,Slc39a10,Abl2,Itgav,Itpr1,Bag3,Kank2,Pak4,Cast,Abl1,Dapk1,Dab2,Uri1,Chd8,Fyn,Jun,Oxr1,Pak3,Itsn1,Ssh1,Mef2c,Wnk3
GO:0023056	Positive regulation of signaling	24	1769	0.31	0.0466	1.33161	10090.ENSMUSP00000006037,10090.ENSMUSP00000020188,10090.ENSMUSP00000023467,10090.ENSMUSP00000023741,10090.ENSMUSP00000026436,10090.ENSMUSP00000027131,10090.ENSMUSP00000027888,10090.ENSMUSP00000029766,10090.ENSMUSP00000033131,10090.ENSMUSP00000038613,10090.ENSMUSP00000042271,10090.ENSMUSP00000075167,10090.ENSMUSP00000079689,10090.ENSMUSP00000084041,10090.ENSMUSP00000087511,10090.ENSMUSP00000097547…	Ncoa2,Ifngr1,Pak2,Kmt2d,Baiap2,Slc39a10,Abl2,Bcar3,Lamtor1,Jcad,Spag9,Abl1,Dab2,Pkd2,Sybu,Fyn,Jun,Mavs,Pak3,Itsn1,Ssh1,Tnik,Tiam1,Mef2c
GO:0051017	Actin filament bundle assembly	4	57	1.02	0.0468	1.32975	10090.ENSMUSP00000026436,10090.ENSMUSP00000027888,10090.ENSMUSP00000104322,10090.ENSMUSP00000109979	Baiap2,Abl2,Gas7,Add1
GO:0031103	Axon regeneration	3	24	1.27	0.048	1.31876	10090.ENSMUSP00000068374,10090.ENSMUSP00000091061,10090.ENSMUSP00000102711	Map1b,Nefh,Jun
GO:0048708	Astrocyte differentiation	4	58	1.01	0.0494	1.30627	10090.ENSMUSP00000020188,10090.ENSMUSP00000027888,10090.ENSMUSP00000028062,10090.ENSMUSP00000075167	Ifngr1,Abl2,Vim,Abl1

## Sheet: Q2_4 hr STPXK Ontology
#term ID	term description	observed gene count	background gene count	strength	false discovery rate	"-LOG10(FDR)"	matching proteins in your network (IDs)	matching proteins in your network (labels)
GO:0007049	Cell cycle	12	1138	0.85	0.00084	3.07572	10090.ENSMUSP00000005503,10090.ENSMUSP00000006565,10090.ENSMUSP00000022998,10090.ENSMUSP00000029170,10090.ENSMUSP00000034065,10090.ENSMUSP00000036924,10090.ENSMUSP00000075067,10090.ENSMUSP00000078022,10090.ENSMUSP00000090525,10090.ENSMUSP00000107231,10090.ENSMUSP00000108310,10090.ENSMUSP00000109109	Msh6,Cdc20,Mtbp,Rbl1,Nek1,Ccar2,Npm1,Tdrd9,Lig3,Tdrd1,Hfm1,Zfp318
GO:0051276	Chromosome organization	10	946	0.85	0.0067	2.17393	10090.ENSMUSP00000005503,10090.ENSMUSP00000006565,10090.ENSMUSP00000024657,10090.ENSMUSP00000029170,10090.ENSMUSP00000039422,10090.ENSMUSP00000042792,10090.ENSMUSP00000075067,10090.ENSMUSP00000105007,10090.ENSMUSP00000107750,10090.ENSMUSP00000108310	Msh6,Cdc20,Phf10,Rbl1,Shprh,Msl1,Npm1,Brd1,Hat1,Hfm1
GO:0090304	Nucleic acid metabolic process	13	1777	0.69	0.0067	2.17393	10090.ENSMUSP00000005503,10090.ENSMUSP00000031092,10090.ENSMUSP00000036924,10090.ENSMUSP00000039422,10090.ENSMUSP00000075067,10090.ENSMUSP00000078022,10090.ENSMUSP00000089540,10090.ENSMUSP00000090525,10090.ENSMUSP00000107231,10090.ENSMUSP00000108310,10090.ENSMUSP00000128331,10090.ENSMUSP00000133045,10090.ENSMUSP00000135476	Msh6,Rfc1,Ccar2,Shprh,Npm1,Tdrd9,Rbm27,Lig3,Tdrd1,Hfm1,Nolc1,Lin52,Tcof1
GO:0006259	DNA metabolic process	8	638	0.92	0.0163	1.78781	10090.ENSMUSP00000005503,10090.ENSMUSP00000031092,10090.ENSMUSP00000039422,10090.ENSMUSP00000075067,10090.ENSMUSP00000078022,10090.ENSMUSP00000090525,10090.ENSMUSP00000107231,10090.ENSMUSP00000108310	Msh6,Rfc1,Shprh,Npm1,Tdrd9,Lig3,Tdrd1,Hfm1
GO:0006996	Organelle organization	15	3066	0.51	0.0297	1.52724	10090.ENSMUSP00000005503,10090.ENSMUSP00000006565,10090.ENSMUSP00000024657,10090.ENSMUSP00000029170,10090.ENSMUSP00000034065,10090.ENSMUSP00000036924,10090.ENSMUSP00000039422,10090.ENSMUSP00000042792,10090.ENSMUSP00000075067,10090.ENSMUSP00000078022,10090.ENSMUSP00000090525,10090.ENSMUSP00000105007,10090.ENSMUSP00000107750,10090.ENSMUSP00000108310,10090.ENSMUSP00000128331	Msh6,Cdc20,Phf10,Rbl1,Nek1,Ccar2,Shprh,Msl1,Npm1,Tdrd9,Lig3,Brd1,Hat1,Hfm1,Nolc1
GO:0010605	Negative regulation of macromolecule metabolic process	14	2646	0.55	0.0297	1.52724	10090.ENSMUSP00000005503,10090.ENSMUSP00000024657,10090.ENSMUSP00000027438,10090.ENSMUSP00000029170,10090.ENSMUSP00000031092,10090.ENSMUSP00000036924,10090.ENSMUSP00000068192,10090.ENSMUSP00000075067,10090.ENSMUSP00000078022,10090.ENSMUSP00000090525,10090.ENSMUSP00000103222,10090.ENSMUSP00000107231,10090.ENSMUSP00000107750,10090.ENSMUSP00000109109	Msh6,Phf10,Ncl,Rbl1,Rfc1,Ccar2,Zfp608,Npm1,Tdrd9,Lig3,Srcin1,Tdrd1,Hat1,Zfp318
GO:0043170	Macromolecule metabolic process	20	5313	0.4	0.0297	1.52724	10090.ENSMUSP00000005503,10090.ENSMUSP00000006565,10090.ENSMUSP00000024657,10090.ENSMUSP00000031092,10090.ENSMUSP00000034065,10090.ENSMUSP00000036924,10090.ENSMUSP00000039422,10090.ENSMUSP00000042792,10090.ENSMUSP00000075067,10090.ENSMUSP00000078022,10090.ENSMUSP00000089540,10090.ENSMUSP00000090525,10090.ENSMUSP00000092538,10090.ENSMUSP00000105007,10090.ENSMUSP00000107231,10090.ENSMUSP00000107750…	Msh6,Cdc20,Phf10,Rfc1,Nek1,Ccar2,Shprh,Msl1,Npm1,Tdrd9,Rbm27,Lig3,Usp24,Brd1,Tdrd1,Hat1,Hfm1,Nolc1,Lin52,Tcof1
GO:0019222	Regulation of metabolic process	21	6085	0.36	0.0325	1.48812	10090.ENSMUSP00000005503,10090.ENSMUSP00000006565,10090.ENSMUSP00000022998,10090.ENSMUSP00000024657,10090.ENSMUSP00000027438,10090.ENSMUSP00000029170,10090.ENSMUSP00000031092,10090.ENSMUSP00000034065,10090.ENSMUSP00000036924,10090.ENSMUSP00000044815,10090.ENSMUSP00000068192,10090.ENSMUSP00000075067,10090.ENSMUSP00000078022,10090.ENSMUSP00000090525,10090.ENSMUSP00000103222,10090.ENSMUSP00000107231…	Msh6,Cdc20,Mtbp,Phf10,Ncl,Rbl1,Rfc1,Nek1,Ccar2,Suco,Zfp608,Npm1,Tdrd9,Lig3,Srcin1,Tdrd1,Hat1,Zfp318,Magi3,Nolc1,Tcof1
GO:0006325	Chromatin organization	7	625	0.87	0.034	1.46852	10090.ENSMUSP00000024657,10090.ENSMUSP00000029170,10090.ENSMUSP00000039422,10090.ENSMUSP00000042792,10090.ENSMUSP00000075067,10090.ENSMUSP00000105007,10090.ENSMUSP00000107750	Phf10,Rbl1,Shprh,Msl1,Npm1,Brd1,Hat1
GO:0006807	Nitrogen compound metabolic process	20	5878	0.36	0.034	1.46852	10090.ENSMUSP00000005503,10090.ENSMUSP00000006565,10090.ENSMUSP00000024657,10090.ENSMUSP00000031092,10090.ENSMUSP00000034065,10090.ENSMUSP00000036924,10090.ENSMUSP00000039422,10090.ENSMUSP00000042792,10090.ENSMUSP00000075067,10090.ENSMUSP00000078022,10090.ENSMUSP00000089540,10090.ENSMUSP00000090525,10090.ENSMUSP00000092538,10090.ENSMUSP00000105007,10090.ENSMUSP00000107231,10090.ENSMUSP00000107750…	Msh6,Cdc20,Phf10,Rfc1,Nek1,Ccar2,Shprh,Msl1,Npm1,Tdrd9,Rbm27,Lig3,Usp24,Brd1,Tdrd1,Hat1,Hfm1,Nolc1,Lin52,Tcof1
GO:0010629	Negative regulation of gene expression	11	1811	0.61	0.034	1.46852	10090.ENSMUSP00000024657,10090.ENSMUSP00000027438,10090.ENSMUSP00000029170,10090.ENSMUSP00000031092,10090.ENSMUSP00000036924,10090.ENSMUSP00000068192,10090.ENSMUSP00000075067,10090.ENSMUSP00000078022,10090.ENSMUSP00000107231,10090.ENSMUSP00000107750,10090.ENSMUSP00000109109	Phf10,Ncl,Rbl1,Rfc1,Ccar2,Zfp608,Npm1,Tdrd9,Tdrd1,Hat1,Zfp318
GO:0016573	Histone acetylation	4	108	1.39	0.034	1.46852	10090.ENSMUSP00000024657,10090.ENSMUSP00000042792,10090.ENSMUSP00000105007,10090.ENSMUSP00000107750	Phf10,Msl1,Brd1,Hat1
GO:0044260	Cellular macromolecule metabolic process	17	4161	0.44	0.034	1.46852	10090.ENSMUSP00000005503,10090.ENSMUSP00000006565,10090.ENSMUSP00000024657,10090.ENSMUSP00000031092,10090.ENSMUSP00000034065,10090.ENSMUSP00000039422,10090.ENSMUSP00000042792,10090.ENSMUSP00000075067,10090.ENSMUSP00000078022,10090.ENSMUSP00000090525,10090.ENSMUSP00000092538,10090.ENSMUSP00000105007,10090.ENSMUSP00000107231,10090.ENSMUSP00000107750,10090.ENSMUSP00000108310,10090.ENSMUSP00000133045…	Msh6,Cdc20,Phf10,Rfc1,Nek1,Shprh,Msl1,Npm1,Tdrd9,Lig3,Usp24,Brd1,Tdrd1,Hat1,Hfm1,Lin52,Tcof1
GO:0045934	Negative regulation of nucleobase-containing compound metabolic process	10	1415	0.67	0.034	1.46852	10090.ENSMUSP00000005503,10090.ENSMUSP00000024657,10090.ENSMUSP00000029170,10090.ENSMUSP00000031092,10090.ENSMUSP00000036924,10090.ENSMUSP00000068192,10090.ENSMUSP00000075067,10090.ENSMUSP00000090525,10090.ENSMUSP00000107750,10090.ENSMUSP00000109109	Msh6,Phf10,Rbl1,Rfc1,Ccar2,Zfp608,Npm1,Lig3,Hat1,Zfp318
GO:0051321	Meiotic cell cycle	5	229	1.16	0.034	1.46852	10090.ENSMUSP00000005503,10090.ENSMUSP00000078022,10090.ENSMUSP00000107231,10090.ENSMUSP00000108310,10090.ENSMUSP00000109109	Msh6,Tdrd9,Tdrd1,Hfm1,Zfp318
GO:0060255	Regulation of macromolecule metabolic process	20	5618	0.38	0.034	1.46852	10090.ENSMUSP00000005503,10090.ENSMUSP00000006565,10090.ENSMUSP00000022998,10090.ENSMUSP00000024657,10090.ENSMUSP00000027438,10090.ENSMUSP00000029170,10090.ENSMUSP00000031092,10090.ENSMUSP00000034065,10090.ENSMUSP00000036924,10090.ENSMUSP00000068192,10090.ENSMUSP00000075067,10090.ENSMUSP00000078022,10090.ENSMUSP00000090525,10090.ENSMUSP00000103222,10090.ENSMUSP00000107231,10090.ENSMUSP00000107750…	Msh6,Cdc20,Mtbp,Phf10,Ncl,Rbl1,Rfc1,Nek1,Ccar2,Zfp608,Npm1,Tdrd9,Lig3,Srcin1,Tdrd1,Hat1,Zfp318,Magi3,Nolc1,Tcof1
GO:0006974	Cellular response to dna damage stimulus	7	667	0.85	0.0373	1.42829	10090.ENSMUSP00000005503,10090.ENSMUSP00000031092,10090.ENSMUSP00000034065,10090.ENSMUSP00000036924,10090.ENSMUSP00000039422,10090.ENSMUSP00000075067,10090.ENSMUSP00000090525	Msh6,Rfc1,Nek1,Ccar2,Shprh,Npm1,Lig3
GO:0051172	Negative regulation of nitrogen compound metabolic process	12	2310	0.54	0.0493	1.30715	10090.ENSMUSP00000005503,10090.ENSMUSP00000024657,10090.ENSMUSP00000027438,10090.ENSMUSP00000029170,10090.ENSMUSP00000031092,10090.ENSMUSP00000036924,10090.ENSMUSP00000068192,10090.ENSMUSP00000075067,10090.ENSMUSP00000090525,10090.ENSMUSP00000103222,10090.ENSMUSP00000107750,10090.ENSMUSP00000109109	Msh6,Phf10,Ncl,Rbl1,Rfc1,Ccar2,Zfp608,Npm1,Lig3,Srcin1,Hat1,Zfp318

## Sheet: Q1_2.5-3D Ontology
#term ID	term description	observed gene count	background gene count	strength	false discovery rate	"-LOG10(FDR)"	matching proteins in your network (IDs)	matching proteins in your network (labels)
GO:0048232	Male gamete generation	43	563	0.9	7.78e-21	20.109	10090.ENSMUSP00000001599,10090.ENSMUSP00000002395,10090.ENSMUSP00000007735,10090.ENSMUSP00000008051,10090.ENSMUSP00000020566,10090.ENSMUSP00000022081,10090.ENSMUSP00000023530,10090.ENSMUSP00000023813,10090.ENSMUSP00000024832,10090.ENSMUSP00000026555,10090.ENSMUSP00000029927,10090.ENSMUSP00000033380,10090.ENSMUSP00000035100,10090.ENSMUSP00000035338,10090.ENSMUSP00000036422,10090.ENSMUSP00000036964…	Klhl10,Rec8,Tssk4,Cabs1,Theg,Spata9,Ropn1,Tarbp2,Rsph1,Odf3,Spaca1,Cdk16,Ttc21a,Tdrd6,Tbata,Spata6,Odf4,Tssk1,Catsper1,Psme4,Prm2,Ccdc63,Tex14,Txndc2,Prm3,Osbp2,Odf1,Eif4g3,Mycbpap,Ccdc108,Rnf17,Ccdc136,Spata31,Spata32,Nwc,Odf2,Cabyr,Fsip2,H1fnt,Rimbp3,Dpy19l2,Spata18,Oaz3
GO:0007283	Spermatogenesis	42	542	0.9	8.83e-21	20.054	10090.ENSMUSP00000001599,10090.ENSMUSP00000002395,10090.ENSMUSP00000007735,10090.ENSMUSP00000008051,10090.ENSMUSP00000020566,10090.ENSMUSP00000022081,10090.ENSMUSP00000023530,10090.ENSMUSP00000023813,10090.ENSMUSP00000024832,10090.ENSMUSP00000026555,10090.ENSMUSP00000029927,10090.ENSMUSP00000033380,10090.ENSMUSP00000035100,10090.ENSMUSP00000035338,10090.ENSMUSP00000036422,10090.ENSMUSP00000036964…	Klhl10,Rec8,Tssk4,Cabs1,Theg,Spata9,Ropn1,Tarbp2,Rsph1,Odf3,Spaca1,Cdk16,Ttc21a,Tdrd6,Tbata,Spata6,Odf4,Tssk1,Catsper1,Psme4,Prm2,Ccdc63,Txndc2,Prm3,Osbp2,Odf1,Eif4g3,Mycbpap,Ccdc108,Rnf17,Ccdc136,Spata31,Spata32,Nwc,Odf2,Cabyr,Fsip2,H1fnt,Rimbp3,Dpy19l2,Spata18,Oaz3
GO:0007276	Gamete generation	44	691	0.82	6.33e-19	18.1986	10090.ENSMUSP00000001599,10090.ENSMUSP00000002395,10090.ENSMUSP00000007735,10090.ENSMUSP00000008051,10090.ENSMUSP00000020566,10090.ENSMUSP00000022081,10090.ENSMUSP00000023530,10090.ENSMUSP00000023813,10090.ENSMUSP00000024832,10090.ENSMUSP00000026555,10090.ENSMUSP00000029927,10090.ENSMUSP00000033380,10090.ENSMUSP00000035100,10090.ENSMUSP00000035338,10090.ENSMUSP00000036422,10090.ENSMUSP00000036964…	Klhl10,Rec8,Tssk4,Cabs1,Theg,Spata9,Ropn1,Tarbp2,Rsph1,Odf3,Spaca1,Cdk16,Ttc21a,Tdrd6,Tbata,Spata6,Odf4,Tssk1,Catsper1,Psme4,Prm2,Ccdc63,Tex14,Txndc2,Prm3,Osbp2,Top2a,Odf1,Eif4g3,Mycbpap,Ccdc108,Rnf17,Ccdc136,Spata31,Spata32,Nwc,Odf2,Cabyr,Fsip2,H1fnt,Rimbp3,Dpy19l2,Spata18,Oaz3
GO:0019953	Sexual reproduction	47	834	0.76	1.66e-18	17.7799	10090.ENSMUSP00000001599,10090.ENSMUSP00000002013,10090.ENSMUSP00000002395,10090.ENSMUSP00000007735,10090.ENSMUSP00000008051,10090.ENSMUSP00000020566,10090.ENSMUSP00000022081,10090.ENSMUSP00000023089,10090.ENSMUSP00000023530,10090.ENSMUSP00000023813,10090.ENSMUSP00000024832,10090.ENSMUSP00000026555,10090.ENSMUSP00000029927,10090.ENSMUSP00000033380,10090.ENSMUSP00000035100,10090.ENSMUSP00000035338…	Klhl10,Spa17,Rec8,Tssk4,Cabs1,Theg,Spata9,Wbp2nl,Ropn1,Tarbp2,Rsph1,Odf3,Spaca1,Cdk16,Ttc21a,Tdrd6,Tbata,Spata6,Trim36,Odf4,Tssk1,Catsper1,Psme4,Prm2,Ccdc63,Tex14,Txndc2,Prm3,Osbp2,Top2a,Odf1,Eif4g3,Mycbpap,Ccdc108,Rnf17,Ccdc136,Spata31,Spata32,Nwc,Odf2,Cabyr,Fsip2,H1fnt,Rimbp3,Dpy19l2,Spata18,Oaz3
GO:0048609	Multicellular organismal reproductive process	45	848	0.74	1.12e-16	15.9508	10090.ENSMUSP00000001599,10090.ENSMUSP00000002395,10090.ENSMUSP00000007735,10090.ENSMUSP00000008051,10090.ENSMUSP00000020566,10090.ENSMUSP00000022081,10090.ENSMUSP00000023530,10090.ENSMUSP00000023813,10090.ENSMUSP00000024832,10090.ENSMUSP00000025002,10090.ENSMUSP00000026555,10090.ENSMUSP00000029927,10090.ENSMUSP00000033380,10090.ENSMUSP00000035100,10090.ENSMUSP00000035338,10090.ENSMUSP00000036422…	Klhl10,Rec8,Tssk4,Cabs1,Theg,Spata9,Ropn1,Tarbp2,Rsph1,Tekt4,Odf3,Spaca1,Cdk16,Ttc21a,Tdrd6,Tbata,Spata6,Odf4,Tssk1,Catsper1,Psme4,Prm2,Ccdc63,Tex14,Txndc2,Prm3,Osbp2,Top2a,Odf1,Eif4g3,Mycbpap,Ccdc108,Rnf17,Ccdc136,Spata31,Spata32,Nwc,Odf2,Cabyr,Fsip2,H1fnt,Rimbp3,Dpy19l2,Spata18,Oaz3
GO:0044703	Multi-organism reproductive process	48	1000	0.69	1.85e-16	15.7328	10090.ENSMUSP00000001599,10090.ENSMUSP00000002013,10090.ENSMUSP00000002395,10090.ENSMUSP00000007735,10090.ENSMUSP00000008051,10090.ENSMUSP00000020566,10090.ENSMUSP00000022081,10090.ENSMUSP00000023089,10090.ENSMUSP00000023530,10090.ENSMUSP00000023813,10090.ENSMUSP00000024832,10090.ENSMUSP00000025002,10090.ENSMUSP00000026555,10090.ENSMUSP00000029927,10090.ENSMUSP00000033380,10090.ENSMUSP00000035100…	Klhl10,Spa17,Rec8,Tssk4,Cabs1,Theg,Spata9,Wbp2nl,Ropn1,Tarbp2,Rsph1,Tekt4,Odf3,Spaca1,Cdk16,Ttc21a,Tdrd6,Tbata,Spata6,Trim36,Odf4,Tssk1,Catsper1,Psme4,Prm2,Ccdc63,Tex14,Txndc2,Prm3,Osbp2,Top2a,Odf1,Eif4g3,Mycbpap,Ccdc108,Rnf17,Ccdc136,Spata31,Spata32,Nwc,Odf2,Cabyr,Fsip2,H1fnt,Rimbp3,Dpy19l2,Spata18,Oaz3
GO:0048515	Spermatid differentiation	23	181	1.12	7.33e-15	14.1349	10090.ENSMUSP00000001599,10090.ENSMUSP00000002395,10090.ENSMUSP00000007735,10090.ENSMUSP00000023530,10090.ENSMUSP00000023813,10090.ENSMUSP00000024832,10090.ENSMUSP00000029927,10090.ENSMUSP00000035100,10090.ENSMUSP00000036422,10090.ENSMUSP00000040302,10090.ENSMUSP00000045460,10090.ENSMUSP00000047925,10090.ENSMUSP00000050582,10090.ENSMUSP00000068652,10090.ENSMUSP00000092440,10090.ENSMUSP00000093469…	Klhl10,Rec8,Tssk4,Ropn1,Tarbp2,Rsph1,Spaca1,Ttc21a,Tbata,Tssk1,Psme4,Prm2,Ccdc63,Osbp2,Ccdc108,Rnf17,Ccdc136,Odf2,Cabyr,Fsip2,H1fnt,Rimbp3,Dpy19l2
GO:0007286	Spermatid development	22	172	1.12	3.22e-14	13.4921	10090.ENSMUSP00000001599,10090.ENSMUSP00000002395,10090.ENSMUSP00000007735,10090.ENSMUSP00000023530,10090.ENSMUSP00000023813,10090.ENSMUSP00000024832,10090.ENSMUSP00000029927,10090.ENSMUSP00000035100,10090.ENSMUSP00000040302,10090.ENSMUSP00000045460,10090.ENSMUSP00000047925,10090.ENSMUSP00000050582,10090.ENSMUSP00000068652,10090.ENSMUSP00000092440,10090.ENSMUSP00000093469,10090.ENSMUSP00000093789…	Klhl10,Rec8,Tssk4,Ropn1,Tarbp2,Rsph1,Spaca1,Ttc21a,Tssk1,Psme4,Prm2,Ccdc63,Osbp2,Ccdc108,Rnf17,Ccdc136,Odf2,Cabyr,Fsip2,H1fnt,Rimbp3,Dpy19l2
GO:0022414	Reproductive process	52	1467	0.56	6.75e-13	12.1707	10090.ENSMUSP00000001599,10090.ENSMUSP00000002013,10090.ENSMUSP00000002395,10090.ENSMUSP00000007735,10090.ENSMUSP00000008051,10090.ENSMUSP00000020566,10090.ENSMUSP00000022081,10090.ENSMUSP00000023089,10090.ENSMUSP00000023530,10090.ENSMUSP00000023813,10090.ENSMUSP00000024832,10090.ENSMUSP00000025002,10090.ENSMUSP00000026555,10090.ENSMUSP00000029927,10090.ENSMUSP00000033380,10090.ENSMUSP00000035100…	Klhl10,Spa17,Rec8,Tssk4,Cabs1,Theg,Spata9,Wbp2nl,Ropn1,Tarbp2,Rsph1,Tekt4,Odf3,Spaca1,Cdk16,Ttc21a,Tdrd6,Tbata,Spata6,Trim36,Ccdc40,Odf4,Tssk1,Catsper1,Psme4,Prm2,Ccdc63,Akap4,Tex14,Txndc2,Prm3,Osbp2,Top2a,Gapdhs,Odf1,Eif4g3,Mycbpap,Ccdc108,Rnf17,Ccdc136,Spata31,Spata32,Dnaic1,Nwc,Odf2,Cabyr,Fsip2,H1fnt,Rimbp3,Dpy19l2,Spata18,Oaz3
GO:0022412	Cellular process involved in reproduction in multicellular organism	27	384	0.86	4.88e-12	11.3116	10090.ENSMUSP00000001599,10090.ENSMUSP00000002395,10090.ENSMUSP00000007735,10090.ENSMUSP00000023530,10090.ENSMUSP00000023813,10090.ENSMUSP00000024832,10090.ENSMUSP00000029927,10090.ENSMUSP00000035100,10090.ENSMUSP00000035338,10090.ENSMUSP00000036422,10090.ENSMUSP00000040302,10090.ENSMUSP00000045430,10090.ENSMUSP00000045460,10090.ENSMUSP00000047925,10090.ENSMUSP00000050582,10090.ENSMUSP00000054444…	Klhl10,Rec8,Tssk4,Ropn1,Tarbp2,Rsph1,Spaca1,Ttc21a,Tdrd6,Tbata,Tssk1,Catsper1,Psme4,Prm2,Ccdc63,Tex14,Osbp2,Top2a,Ccdc108,Rnf17,Ccdc136,Odf2,Cabyr,Fsip2,H1fnt,Rimbp3,Dpy19l2
GO:0007281	Germ cell development	23	285	0.92	3.77e-11	10.4237	10090.ENSMUSP00000001599,10090.ENSMUSP00000002395,10090.ENSMUSP00000007735,10090.ENSMUSP00000023530,10090.ENSMUSP00000023813,10090.ENSMUSP00000024832,10090.ENSMUSP00000029927,10090.ENSMUSP00000035100,10090.ENSMUSP00000035338,10090.ENSMUSP00000040302,10090.ENSMUSP00000045460,10090.ENSMUSP00000047925,10090.ENSMUSP00000050582,10090.ENSMUSP00000068652,10090.ENSMUSP00000092440,10090.ENSMUSP00000093469…	Klhl10,Rec8,Tssk4,Ropn1,Tarbp2,Rsph1,Spaca1,Ttc21a,Tdrd6,Tssk1,Psme4,Prm2,Ccdc63,Osbp2,Ccdc108,Rnf17,Ccdc136,Odf2,Cabyr,Fsip2,H1fnt,Rimbp3,Dpy19l2
GO:0003341	Cilium movement	17	146	1.08	4.12e-10	9.3851	10090.ENSMUSP00000007735,10090.ENSMUSP00000023530,10090.ENSMUSP00000025002,10090.ENSMUSP00000035100,10090.ENSMUSP00000039463,10090.ENSMUSP00000043304,10090.ENSMUSP00000045430,10090.ENSMUSP00000050582,10090.ENSMUSP00000050962,10090.ENSMUSP00000054909,10090.ENSMUSP00000059630,10090.ENSMUSP00000074317,10090.ENSMUSP00000092440,10090.ENSMUSP00000100028,10090.ENSMUSP00000102481,10090.ENSMUSP00000120314…	Tssk4,Ropn1,Tekt4,Ttc21a,Ccdc40,Kif27,Catsper1,Ccdc63,Akap4,Txndc2,Prm3,Gapdhs,Ccdc108,Dnaic1,Wdr78,Fsip2,Gm101
GO:0007018	Microtubule-based movement	23	336	0.85	8.34e-10	9.07883	10090.ENSMUSP00000007735,10090.ENSMUSP00000023530,10090.ENSMUSP00000024983,10090.ENSMUSP00000025002,10090.ENSMUSP00000030539,10090.ENSMUSP00000035100,10090.ENSMUSP00000039463,10090.ENSMUSP00000043304,10090.ENSMUSP00000045430,10090.ENSMUSP00000045480,10090.ENSMUSP00000050582,10090.ENSMUSP00000050962,10090.ENSMUSP00000054909,10090.ENSMUSP00000059630,10090.ENSMUSP00000064261,10090.ENSMUSP00000074317…	Tssk4,Ropn1,Ift140,Tekt4,Kif17,Ttc21a,Ccdc40,Kif27,Catsper1,Dync1li2,Ccdc63,Akap4,Txndc2,Prm3,Kif2c,Gapdhs,Ccdc108,Dnaic1,Ssx2ip,Wdr78,Klc3,Fsip2,Gm101
GO:0007017	Microtubule-based process	32	722	0.66	1.67e-09	8.77728	10090.ENSMUSP00000007735,10090.ENSMUSP00000023530,10090.ENSMUSP00000024832,10090.ENSMUSP00000024983,10090.ENSMUSP00000025002,10090.ENSMUSP00000030539,10090.ENSMUSP00000035100,10090.ENSMUSP00000037978,10090.ENSMUSP00000039463,10090.ENSMUSP00000039912,10090.ENSMUSP00000042342,10090.ENSMUSP00000043304,10090.ENSMUSP00000045430,10090.ENSMUSP00000045480,10090.ENSMUSP00000046003,10090.ENSMUSP00000050582…	Tssk4,Ropn1,Rsph1,Ift140,Tekt4,Kif17,Ttc21a,Trim36,Ccdc40,Ccdc67,Tubb4b,Kif27,Catsper1,Dync1li2,Cdc14b,Ccdc63,Akap4,Txndc2,Prm3,Kif2c,Gapdhs,Arhgef10,Ccdc108,Dnaic1,Ssx2ip,Wdr78,Klc3,Odf2,Cdk5rap2,Fsip2,Cfap74,Gm101
GO:0044782	Cilium organization	21	298	0.86	4.64e-09	8.33348	10090.ENSMUSP00000023530,10090.ENSMUSP00000024832,10090.ENSMUSP00000024983,10090.ENSMUSP00000025002,10090.ENSMUSP00000027959,10090.ENSMUSP00000030539,10090.ENSMUSP00000035100,10090.ENSMUSP00000036964,10090.ENSMUSP00000039463,10090.ENSMUSP00000043304,10090.ENSMUSP00000046003,10090.ENSMUSP00000050582,10090.ENSMUSP00000050962,10090.ENSMUSP00000092440,10090.ENSMUSP00000100028,10090.ENSMUSP00000101759…	Ropn1,Rsph1,Ift140,Tekt4,Fltp,Kif17,Ttc21a,Spata6,Ccdc40,Kif27,Cdc14b,Ccdc63,Akap4,Ccdc108,Dnaic1,Ssx2ip,Klc3,Odf2,Fsip2,Cfap74,Gm101
GO:0060294	Cilium movement involved in cell motility	13	104	1.11	9.35e-08	7.02919	10090.ENSMUSP00000007735,10090.ENSMUSP00000023530,10090.ENSMUSP00000025002,10090.ENSMUSP00000035100,10090.ENSMUSP00000039463,10090.ENSMUSP00000045430,10090.ENSMUSP00000050962,10090.ENSMUSP00000054909,10090.ENSMUSP00000059630,10090.ENSMUSP00000074317,10090.ENSMUSP00000092440,10090.ENSMUSP00000100028,10090.ENSMUSP00000120314	Tssk4,Ropn1,Tekt4,Ttc21a,Ccdc40,Catsper1,Akap4,Txndc2,Prm3,Gapdhs,Ccdc108,Dnaic1,Fsip2
GO:0030317	Flagellated sperm motility	12	97	1.11	4.81e-07	6.31785	10090.ENSMUSP00000007735,10090.ENSMUSP00000023530,10090.ENSMUSP00000035100,10090.ENSMUSP00000039463,10090.ENSMUSP00000045430,10090.ENSMUSP00000050962,10090.ENSMUSP00000054909,10090.ENSMUSP00000059630,10090.ENSMUSP00000074317,10090.ENSMUSP00000092440,10090.ENSMUSP00000100028,10090.ENSMUSP00000120314	Tssk4,Ropn1,Ttc21a,Ccdc40,Catsper1,Akap4,Txndc2,Prm3,Gapdhs,Ccdc108,Dnaic1,Fsip2
GO:0060271	Cilium assembly	15	262	0.77	5.84e-05	4.23359	10090.ENSMUSP00000024832,10090.ENSMUSP00000024983,10090.ENSMUSP00000025002,10090.ENSMUSP00000036964,10090.ENSMUSP00000039463,10090.ENSMUSP00000043304,10090.ENSMUSP00000046003,10090.ENSMUSP00000050582,10090.ENSMUSP00000050962,10090.ENSMUSP00000092440,10090.ENSMUSP00000100028,10090.ENSMUSP00000101759,10090.ENSMUSP00000120314,10090.ENSMUSP00000131899,10090.ENSMUSP00000134576	Rsph1,Ift140,Tekt4,Spata6,Ccdc40,Kif27,Cdc14b,Ccdc63,Akap4,Ccdc108,Dnaic1,Ssx2ip,Fsip2,Cfap74,Gm101
GO:0070925	Organelle assembly	23	642	0.57	8.47e-05	4.07212	10090.ENSMUSP00000023089,10090.ENSMUSP00000023269,10090.ENSMUSP00000024832,10090.ENSMUSP00000024983,10090.ENSMUSP00000025002,10090.ENSMUSP00000029927,10090.ENSMUSP00000036964,10090.ENSMUSP00000039463,10090.ENSMUSP00000039912,10090.ENSMUSP00000043304,10090.ENSMUSP00000046003,10090.ENSMUSP00000050582,10090.ENSMUSP00000050962,10090.ENSMUSP00000081225,10090.ENSMUSP00000092440,10090.ENSMUSP00000093789…	Wbp2nl,Rpl24,Rsph1,Ift140,Tekt4,Spaca1,Spata6,Ccdc40,Ccdc67,Kif27,Cdc14b,Ccdc63,Akap4,Arhgef10,Ccdc108,Ccdc136,Dnaic1,Ssx2ip,Cdk5rap2,Fsip2,Nsun4,Cfap74,Gm101
GO:0009566	Fertilization	11	167	0.83	0.00083	3.08092	10090.ENSMUSP00000001599,10090.ENSMUSP00000002013,10090.ENSMUSP00000002395,10090.ENSMUSP00000007735,10090.ENSMUSP00000023089,10090.ENSMUSP00000023813,10090.ENSMUSP00000037978,10090.ENSMUSP00000045430,10090.ENSMUSP00000093789,10090.ENSMUSP00000106862,10090.ENSMUSP00000127909	Klhl10,Spa17,Rec8,Tssk4,Wbp2nl,Tarbp2,Trim36,Catsper1,Ccdc136,Nwc,Rimbp3
GO:0001578	Microtubule bundle formation	9	108	0.93	0.0012	2.92082	10090.ENSMUSP00000024832,10090.ENSMUSP00000037978,10090.ENSMUSP00000039463,10090.ENSMUSP00000050582,10090.ENSMUSP00000092440,10090.ENSMUSP00000100028,10090.ENSMUSP00000119891,10090.ENSMUSP00000120314,10090.ENSMUSP00000131899	Rsph1,Trim36,Ccdc40,Ccdc63,Ccdc108,Dnaic1,Cdk5rap2,Fsip2,Cfap74
GO:0000226	Microtubule cytoskeleton organization	17	484	0.56	0.0043	2.36653	10090.ENSMUSP00000024832,10090.ENSMUSP00000037978,10090.ENSMUSP00000039463,10090.ENSMUSP00000039912,10090.ENSMUSP00000042342,10090.ENSMUSP00000045480,10090.ENSMUSP00000046003,10090.ENSMUSP00000050582,10090.ENSMUSP00000064261,10090.ENSMUSP00000081225,10090.ENSMUSP00000092440,10090.ENSMUSP00000100028,10090.ENSMUSP00000101759,10090.ENSMUSP00000109388,10090.ENSMUSP00000119891,10090.ENSMUSP00000120314…	Rsph1,Trim36,Ccdc40,Ccdc67,Tubb4b,Dync1li2,Cdc14b,Ccdc63,Kif2c,Arhgef10,Ccdc108,Dnaic1,Ssx2ip,Odf2,Cdk5rap2,Fsip2,Cfap74
GO:0035082	Axoneme assembly	7	74	0.99	0.0072	2.14267	10090.ENSMUSP00000024832,10090.ENSMUSP00000039463,10090.ENSMUSP00000050582,10090.ENSMUSP00000092440,10090.ENSMUSP00000100028,10090.ENSMUSP00000120314,10090.ENSMUSP00000131899	Rsph1,Ccdc40,Ccdc63,Ccdc108,Dnaic1,Fsip2,Cfap74
GO:0030030	Cell projection organization	27	1124	0.39	0.0091	2.04096	10090.ENSMUSP00000010280,10090.ENSMUSP00000023269,10090.ENSMUSP00000023530,10090.ENSMUSP00000024832,10090.ENSMUSP00000024983,10090.ENSMUSP00000025002,10090.ENSMUSP00000027959,10090.ENSMUSP00000030539,10090.ENSMUSP00000033380,10090.ENSMUSP00000035100,10090.ENSMUSP00000036964,10090.ENSMUSP00000039463,10090.ENSMUSP00000039912,10090.ENSMUSP00000043304,10090.ENSMUSP00000046003,10090.ENSMUSP00000050582…	Pifo,Rpl24,Ropn1,Rsph1,Ift140,Tekt4,Fltp,Kif17,Cdk16,Ttc21a,Spata6,Ccdc40,Ccdc67,Kif27,Cdc14b,Ccdc63,Akap4,Lpin1,Hsp90aa1,Ccdc108,Dnaic1,Ssx2ip,Klc3,Odf2,Fsip2,Cfap74,Gm101
GO:0061512	Protein localization to cilium	6	51	1.08	0.0091	2.04096	10090.ENSMUSP00000023530,10090.ENSMUSP00000024983,10090.ENSMUSP00000035100,10090.ENSMUSP00000039463,10090.ENSMUSP00000103391,10090.ENSMUSP00000120314	Ropn1,Ift140,Ttc21a,Ccdc40,Tulp2,Fsip2
GO:0006996	Organelle organization	52	3066	0.24	0.019	1.72125	10090.ENSMUSP00000002395,10090.ENSMUSP00000021802,10090.ENSMUSP00000023089,10090.ENSMUSP00000023269,10090.ENSMUSP00000023530,10090.ENSMUSP00000024779,10090.ENSMUSP00000024832,10090.ENSMUSP00000024983,10090.ENSMUSP00000025002,10090.ENSMUSP00000025379,10090.ENSMUSP00000027959,10090.ENSMUSP00000029927,10090.ENSMUSP00000030539,10090.ENSMUSP00000035100,10090.ENSMUSP00000036964,10090.ENSMUSP00000037978…	Rec8,Cap2,Wbp2nl,Rpl24,Ropn1,Usp49,Rsph1,Ift140,Tekt4,Dpysl3,Fltp,Spaca1,Kif17,Ttc21a,Spata6,Trim36,Ccdc40,Ccdc67,Tubb4b,Ssh2,Kif27,Psme4,Dync1li2,Cdc14b,Prm2,Ccdc63,Akap4,Tex14,Prm3,Kif2c,Top2a,Lpin1,Arhgef10,Hsp90aa1,Ccdc108,Ccdc136,Limch1,Dnaic1,Ssx2ip,Pex5l,Klc3,Kdm5c,Shroom3,Odf2,Mprip,Cdk5rap2,Fsip2,H1fnt,Nsun4,Cfap74,Gm101,Spata18
GO:0120036	Plasma membrane bounded cell projection organization	25	1072	0.38	0.0281	1.55129	10090.ENSMUSP00000023269,10090.ENSMUSP00000023530,10090.ENSMUSP00000024832,10090.ENSMUSP00000024983,10090.ENSMUSP00000025002,10090.ENSMUSP00000027959,10090.ENSMUSP00000030539,10090.ENSMUSP00000033380,10090.ENSMUSP00000035100,10090.ENSMUSP00000036964,10090.ENSMUSP00000039463,10090.ENSMUSP00000043304,10090.ENSMUSP00000046003,10090.ENSMUSP00000050582,10090.ENSMUSP00000050962,10090.ENSMUSP00000070583…	Rpl24,Ropn1,Rsph1,Ift140,Tekt4,Fltp,Kif17,Cdk16,Ttc21a,Spata6,Ccdc40,Kif27,Cdc14b,Ccdc63,Akap4,Lpin1,Hsp90aa1,Ccdc108,Dnaic1,Ssx2ip,Klc3,Odf2,Fsip2,Cfap74,Gm101

## Sheet: Q2_2.5-3D Ontology
#term ID	term description	observed gene count	background gene count	strength	false discovery rate	"-LOG10(FDR)"	matching proteins in your network (IDs)	matching proteins in your network (labels)
GO:0090304	Nucleic acid metabolic process	127	1777	0.56	4.79e-33	32.3197	10090.ENSMUSP00000003527,10090.ENSMUSP00000005705,10090.ENSMUSP00000015645,10090.ENSMUSP00000020252,10090.ENSMUSP00000020513,10090.ENSMUSP00000020687,10090.ENSMUSP00000020801,10090.ENSMUSP00000020877,10090.ENSMUSP00000020959,10090.ENSMUSP00000021097,10090.ENSMUSP00000021824,10090.ENSMUSP00000021929,10090.ENSMUSP00000022147,10090.ENSMUSP00000022577,10090.ENSMUSP00000022793,10090.ENSMUSP00000023882…	Supt5,Trim28,Hivep2,Sycp3,Papolg,Pttg1,Smg8,Twistnb,Rnaseh1,Recql5,Nol8,Habp4,Smn1,Zc3h13,Acin1,Sympk,Ercc3,Wdr33,Pola2,Huwe1,Lactb2,Sf3b1,Rev1,Prim2,Trip12,Ube2t,Dtl,Cstf3,Zc3h8,Sycp1,Larp7,Psip1,Sfpq,Rfc1,Zfp326,Zfml,Aplf,Pagr1a,Atr,Topbp1,Tdrd6,Six6os1,Cdk13,Rad9b,Esf1,Ccar2,Slx4,Ythdc1,Edc4,Shprh,Ticrr,Trmt10a,Smarca5,Atrip,Mael,Rbbp8,Leo1,Piwil2,Ppp1r13l,Acd,Rbbp6,Akap8l,Setx,Rbm15,Pcbp1,Zfp…
GO:0006139	Nucleobase-containing compound metabolic process	130	2205	0.48	2.77e-26	25.5575	10090.ENSMUSP00000003527,10090.ENSMUSP00000005705,10090.ENSMUSP00000015645,10090.ENSMUSP00000020252,10090.ENSMUSP00000020513,10090.ENSMUSP00000020687,10090.ENSMUSP00000020801,10090.ENSMUSP00000020877,10090.ENSMUSP00000020959,10090.ENSMUSP00000021097,10090.ENSMUSP00000021824,10090.ENSMUSP00000021929,10090.ENSMUSP00000022147,10090.ENSMUSP00000022577,10090.ENSMUSP00000022793,10090.ENSMUSP00000023882…	Supt5,Trim28,Hivep2,Sycp3,Papolg,Pttg1,Smg8,Twistnb,Rnaseh1,Recql5,Nol8,Habp4,Smn1,Zc3h13,Acin1,Sympk,Ercc3,Wdr33,Pola2,Bad,Pcgf6,Huwe1,Lactb2,Sf3b1,Rev1,Prim2,Trip12,Ube2t,Dtl,Cstf3,Zc3h8,Sycp1,Larp7,Psip1,Sfpq,Rfc1,Zfp326,Zfml,Aplf,Pagr1a,Atr,Topbp1,Tdrd6,Six6os1,Cdk13,Rad9b,Esf1,Ccar2,Slx4,Ythdc1,Edc4,Shprh,Ticrr,Trmt10a,Smarca5,Atrip,Mael,Rbbp8,Leo1,Piwil2,Ppp1r13l,Acd,Rbbp6,Akap8l,Setx,Rbm15…
GO:0006996	Organelle organization	155	3066	0.41	7.75e-26	25.1107	10090.ENSMUSP00000002444,10090.ENSMUSP00000003876,10090.ENSMUSP00000005705,10090.ENSMUSP00000006565,10090.ENSMUSP00000006625,10090.ENSMUSP00000008733,10090.ENSMUSP00000009667,10090.ENSMUSP00000011493,10090.ENSMUSP00000014220,10090.ENSMUSP00000019514,10090.ENSMUSP00000020099,10090.ENSMUSP00000020252,10090.ENSMUSP00000020420,10090.ENSMUSP00000020687,10090.ENSMUSP00000021097,10090.ENSMUSP00000021155…	Rfx2,Brd8,Trim28,Cdc20,Rbm14,Dnajb6,Ush1c,Dmrtc2,Tctex1d2,Calm3,Cdk1,Sycp3,Ap3d1,Pttg1,Recql5,Tekt1,Cap2,Habp4,Smn1,Diap3,Acin1,Cby1,Prm1,Phf10,Ercc3,Incenp,Bad,Pcgf6,Huwe1,Sgol2,Mrgbp,Rbl1,Sycp1,Nasp,Sfpq,Stmn1,Mapre3,Cenpc1,Ankle2,Tada3,Pagr1a,Nek1,Kif23,Atr,Topbp1,Six6os1,Shcbp1l,Tspyl4,Ccar2,Spata6,Cep72,Kat6a,Slx4,Serbp1,Shprh,Pcm1,Baz1a,Tekt3,Ssh2,Msl1,Smarca5,Mael,Anln,Hydin,Leo1,Phf2,Ptpd…
GO:0051276	Chromosome organization	82	946	0.65	5.49e-25	24.2604	10090.ENSMUSP00000003876,10090.ENSMUSP00000005705,10090.ENSMUSP00000006565,10090.ENSMUSP00000006625,10090.ENSMUSP00000020099,10090.ENSMUSP00000020252,10090.ENSMUSP00000020687,10090.ENSMUSP00000021097,10090.ENSMUSP00000022793,10090.ENSMUSP00000023144,10090.ENSMUSP00000024657,10090.ENSMUSP00000025241,10090.ENSMUSP00000025562,10090.ENSMUSP00000026032,10090.ENSMUSP00000026292,10090.ENSMUSP00000027202…	Brd8,Trim28,Cdc20,Rbm14,Cdk1,Sycp3,Pttg1,Recql5,Acin1,Prm1,Phf10,Ercc3,Incenp,Pcgf6,Huwe1,Sgol2,Mrgbp,Rbl1,Sycp1,Nasp,Sfpq,Cenpc1,Tada3,Pagr1a,Kif23,Atr,Six6os1,Tspyl4,Kat6a,Slx4,Shprh,Baz1a,Msl1,Smarca5,Mael,Leo1,Phf2,Acd,Ep400,Akap8l,Tnp2,Tex14,Fam175a,Cenpe,Whsc1,Mcm3,Nipbl,Cit,Espl1,Ccdc79,Nup98,Rad18,Nap1l4,Npm1,Hspa2,Eya3,Gtf2f2,Morc2a,Meikin,Hsp90aa1,Brd9,Dsn1,Anp32b,Hmga1-rs1,Sirt1,Brd1,A…
GO:0007049	Cell cycle	85	1138	0.58	3.98e-22	21.4001	10090.ENSMUSP00000006565,10090.ENSMUSP00000006898,10090.ENSMUSP00000007800,10090.ENSMUSP00000009667,10090.ENSMUSP00000011493,10090.ENSMUSP00000019514,10090.ENSMUSP00000020099,10090.ENSMUSP00000020252,10090.ENSMUSP00000020687,10090.ENSMUSP00000021097,10090.ENSMUSP00000022612,10090.ENSMUSP00000024701,10090.ENSMUSP00000025562,10090.ENSMUSP00000027202,10090.ENSMUSP00000029170,10090.ENSMUSP00000029448…	Cdc20,Gmnn,Arpp19,Ush1c,Dmrtc2,Calm3,Cdk1,Sycp3,Pttg1,Recql5,Pbk,Pkmyt1,Incenp,Sgol2,Rbl1,Sycp1,Nasp,Stmn1,Ppm1g,Mapre3,Cenpc1,Ankle2,Tada3,Nek1,Kif23,Topbp1,Six6os1,Rad9b,Shcbp1l,Ccar2,Cep72,Slx4,Pcm1,Dlgap5,Ticrr,Mael,Anln,Rbbp8,Piwil2,Akap8l,Tex14,Fam175a,E2f8,Cenpe,Mlf1,Mcm3,Nipbl,Cit,Espl1,Cenpj,Ccdc79,Npm1,Tdrd9,Hspa2,Sycp2,Mdc1,Numa1,Lin9,Mybl1,Cep152,Srsf2,Lig3,Cdc6,Meikin,Ddx4,Dsn1,Ppp1c…
GO:1901360	Organic cyclic compound metabolic process	133	2614	0.41	1.03e-21	20.9872	10090.ENSMUSP00000003527,10090.ENSMUSP00000005003,10090.ENSMUSP00000005705,10090.ENSMUSP00000015645,10090.ENSMUSP00000020252,10090.ENSMUSP00000020513,10090.ENSMUSP00000020687,10090.ENSMUSP00000020801,10090.ENSMUSP00000020877,10090.ENSMUSP00000020959,10090.ENSMUSP00000021097,10090.ENSMUSP00000021824,10090.ENSMUSP00000021929,10090.ENSMUSP00000022147,10090.ENSMUSP00000022577,10090.ENSMUSP00000022793…	Supt5,Lbr,Trim28,Hivep2,Sycp3,Papolg,Pttg1,Smg8,Twistnb,Rnaseh1,Recql5,Nol8,Habp4,Smn1,Zc3h13,Acin1,Sympk,Ercc3,Wdr33,Pola2,Bad,Pcgf6,Huwe1,Lactb2,Sf3b1,Rev1,Prim2,Trip12,Ube2t,Dtl,Cstf3,Zc3h8,Sycp1,Larp7,Psip1,Sfpq,Rfc1,Zfp326,Zfml,Aplf,Pagr1a,Atr,Topbp1,Tdrd6,Six6os1,Cdk13,Rad9b,Esf1,Ccar2,Slx4,Ythdc1,Edc4,Shprh,Ticrr,Trmt10a,Smarca5,Atrip,Mael,Rbbp8,Leo1,Piwil2,Ppp1r13l,Tiparp,Acd,Rbbp6,Akap8l…
GO:0043170	Macromolecule metabolic process	202	5313	0.29	7e-21	20.1549	10090.ENSMUSP00000003527,10090.ENSMUSP00000003876,10090.ENSMUSP00000005336,10090.ENSMUSP00000005705,10090.ENSMUSP00000006565,10090.ENSMUSP00000006625,10090.ENSMUSP00000006898,10090.ENSMUSP00000015645,10090.ENSMUSP00000020099,10090.ENSMUSP00000020252,10090.ENSMUSP00000020420,10090.ENSMUSP00000020513,10090.ENSMUSP00000020687,10090.ENSMUSP00000020801,10090.ENSMUSP00000020877,10090.ENSMUSP00000020959…	Supt5,Brd8,Senp3,Trim28,Cdc20,Rbm14,Gmnn,Hivep2,Cdk1,Sycp3,Ap3d1,Papolg,Pttg1,Smg8,Twistnb,Rnaseh1,Recql5,Nol8,Habp4,Smn1,Zc3h13,Pbk,Acin1,Sympk,Phf10,Pkmyt1,Eif2ak2,Ercc3,Wdr33,Incenp,Pola2,Bad,Pcgf6,Huwe1,Lactb2,Sf3b1,Rev1,Prim2,Trip12,Ube2t,Dtl,Cstf3,Zc3h8,Mrgbp,Sycp1,Larp7,Psip1,Nasp,Sfpq,Prkag2,Ppm1g,Rfc1,Zfp326,Zfml,Aplf,Tada3,Pagr1a,Nek1,Atr,Nktr,Topbp1,Tdrd6,Six6os1,Cdk13,Rad9b,Esf1,Ccar2…
GO:0034641	Cellular nitrogen compound metabolic process	134	2805	0.39	1.44e-19	18.8416	10090.ENSMUSP00000003527,10090.ENSMUSP00000005705,10090.ENSMUSP00000015645,10090.ENSMUSP00000020252,10090.ENSMUSP00000020513,10090.ENSMUSP00000020687,10090.ENSMUSP00000020801,10090.ENSMUSP00000020877,10090.ENSMUSP00000020959,10090.ENSMUSP00000021097,10090.ENSMUSP00000021824,10090.ENSMUSP00000021929,10090.ENSMUSP00000022147,10090.ENSMUSP00000022577,10090.ENSMUSP00000022793,10090.ENSMUSP00000023882…	Supt5,Trim28,Hivep2,Sycp3,Papolg,Pttg1,Smg8,Twistnb,Rnaseh1,Recql5,Nol8,Habp4,Smn1,Zc3h13,Acin1,Sympk,Eif2ak2,Ercc3,Wdr33,Pola2,Bad,Pcgf6,Huwe1,Lactb2,Sf3b1,Rev1,Prim2,Trip12,Ube2t,Dtl,Cstf3,Zc3h8,Sycp1,Larp7,Psip1,Sfpq,Rfc1,Zfp326,Zfml,Aplf,Pagr1a,Atr,Topbp1,Tdrd6,Six6os1,Cdk13,Rad9b,Esf1,Ccar2,Slx4,Ythdc1,Edc4,Shprh,Ticrr,Trmt10a,Smarca5,Atrip,Mael,Rbbp8,Rpl37,Leo1,Piwil2,Ppp1r13l,Acd,Rbbp6,Aka…
GO:0016070	RNA metabolic process	83	1240	0.53	8.39e-19	18.0762	10090.ENSMUSP00000003527,10090.ENSMUSP00000015645,10090.ENSMUSP00000020513,10090.ENSMUSP00000020687,10090.ENSMUSP00000020801,10090.ENSMUSP00000020877,10090.ENSMUSP00000020959,10090.ENSMUSP00000021824,10090.ENSMUSP00000021929,10090.ENSMUSP00000022147,10090.ENSMUSP00000022577,10090.ENSMUSP00000022793,10090.ENSMUSP00000023882,10090.ENSMUSP00000025241,10090.ENSMUSP00000025264,10090.ENSMUSP00000027071…	Supt5,Hivep2,Papolg,Pttg1,Smg8,Twistnb,Rnaseh1,Nol8,Habp4,Smn1,Zc3h13,Acin1,Sympk,Ercc3,Wdr33,Lactb2,Sf3b1,Prim2,Cstf3,Zc3h8,Larp7,Psip1,Sfpq,Zfp326,Zfml,Tdrd6,Cdk13,Esf1,Ccar2,Ythdc1,Edc4,Trmt10a,Smarca5,Mael,Leo1,Piwil2,Ppp1r13l,Rbbp6,Akap8l,Setx,Rbm15,Pcbp1,Zfp768,Mlf1,Slbp,Angel2,Srsf12,Zcchc6,Npm1,Tsnax,Tdrd9,Cherp,U2surp,Thrap3,Lin9,Srpk2,Srrm2,Mybl1,Gtf2f2,Srsf2,Ddx4,Zc3h3,Kti12,Srsf10,Zra…
GO:0071840	Cellular component organization or biogenesis	188	4954	0.29	1.03e-18	17.9872	10090.ENSMUSP00000002444,10090.ENSMUSP00000003876,10090.ENSMUSP00000005705,10090.ENSMUSP00000006565,10090.ENSMUSP00000006625,10090.ENSMUSP00000006898,10090.ENSMUSP00000008733,10090.ENSMUSP00000009667,10090.ENSMUSP00000011493,10090.ENSMUSP00000014220,10090.ENSMUSP00000019514,10090.ENSMUSP00000020099,10090.ENSMUSP00000020252,10090.ENSMUSP00000020420,10090.ENSMUSP00000020687,10090.ENSMUSP00000021097…	Rfx2,Brd8,Trim28,Cdc20,Rbm14,Gmnn,Dnajb6,Ush1c,Dmrtc2,Tctex1d2,Calm3,Cdk1,Sycp3,Ap3d1,Pttg1,Recql5,Tekt1,Cap2,Nol8,Habp4,Smn1,Diap3,Acin1,Cby1,Prm1,Psmg1,Phf10,Ercc3,Incenp,Apba1,Bad,Pcgf6,Huwe1,Sf3b1,Sgol2,Mrgbp,Rbl1,Sycp1,Psip1,Nasp,Sfpq,Stmn1,Mapre3,Cenpc1,Ankle2,Tada3,Pagr1a,Nek1,Kif23,Atr,Topbp1,Tdrd6,Six6os1,Shcbp1l,Tspyl4,Esf1,Arhgap39,Gramd1c,Ccar2,Spata6,Cep72,Kat6a,Slx4,Serbp1,Ythdc1,Sh…
GO:0016043	Cellular component organization	183	4769	0.29	1.54e-18	17.8125	10090.ENSMUSP00000002444,10090.ENSMUSP00000003876,10090.ENSMUSP00000005705,10090.ENSMUSP00000006565,10090.ENSMUSP00000006625,10090.ENSMUSP00000006898,10090.ENSMUSP00000008733,10090.ENSMUSP00000009667,10090.ENSMUSP00000011493,10090.ENSMUSP00000014220,10090.ENSMUSP00000019514,10090.ENSMUSP00000020099,10090.ENSMUSP00000020252,10090.ENSMUSP00000020420,10090.ENSMUSP00000020687,10090.ENSMUSP00000021097…	Rfx2,Brd8,Trim28,Cdc20,Rbm14,Gmnn,Dnajb6,Ush1c,Dmrtc2,Tctex1d2,Calm3,Cdk1,Sycp3,Ap3d1,Pttg1,Recql5,Tekt1,Cap2,Habp4,Smn1,Diap3,Acin1,Cby1,Prm1,Psmg1,Phf10,Ercc3,Incenp,Apba1,Bad,Pcgf6,Huwe1,Sf3b1,Sgol2,Mrgbp,Rbl1,Sycp1,Psip1,Nasp,Sfpq,Stmn1,Mapre3,Cenpc1,Ankle2,Tada3,Pagr1a,Nek1,Kif23,Atr,Topbp1,Tdrd6,Six6os1,Shcbp1l,Tspyl4,Arhgap39,Gramd1c,Ccar2,Spata6,Cep72,Kat6a,Slx4,Serbp1,Ythdc1,Shprh,Pcm1,B…
GO:0006259	DNA metabolic process	58	638	0.67	4.39e-18	17.3575	10090.ENSMUSP00000005705,10090.ENSMUSP00000020252,10090.ENSMUSP00000020687,10090.ENSMUSP00000020959,10090.ENSMUSP00000021097,10090.ENSMUSP00000025241,10090.ENSMUSP00000025752,10090.ENSMUSP00000026292,10090.ENSMUSP00000027251,10090.ENSMUSP00000027312,10090.ENSMUSP00000027421,10090.ENSMUSP00000027687,10090.ENSMUSP00000027933,10090.ENSMUSP00000029448,10090.ENSMUSP00000030623,10090.ENSMUSP00000031092…	Trim28,Sycp3,Pttg1,Rnaseh1,Recql5,Ercc3,Pola2,Huwe1,Rev1,Prim2,Trip12,Ube2t,Dtl,Sycp1,Sfpq,Rfc1,Aplf,Pagr1a,Atr,Topbp1,Six6os1,Rad9b,Slx4,Shprh,Ticrr,Atrip,Mael,Rbbp8,Piwil2,Acd,Setx,Fam175a,Mcm3,Nipbl,Rad18,Npm1,Tdrd9,Eya3,Mdc1,Lin9,Lig3,Cdc6,Hsp90aa1,Ddx4,Hmga1-rs1,Sirt1,Usp47,Tdrd1,Hfm1,Rif1,Cep164,Fzr1,Uimc1,Morc2b,Usp10,Vprbp,Baz2a,Tdrd5
GO:0048232	Male gamete generation	54	563	0.69	1.15e-17	16.9393	10090.ENSMUSP00000002444,10090.ENSMUSP00000008051,10090.ENSMUSP00000011493,10090.ENSMUSP00000020252,10090.ENSMUSP00000023144,10090.ENSMUSP00000025840,10090.ENSMUSP00000025910,10090.ENSMUSP00000027202,10090.ENSMUSP00000029448,10090.ENSMUSP00000029588,10090.ENSMUSP00000034065,10090.ENSMUSP00000035338,10090.ENSMUSP00000035376,10090.ENSMUSP00000036347,10090.ENSMUSP00000036964,10090.ENSMUSP00000037519…	Rfx2,Cabs1,Dmrtc2,Sycp3,Prm1,Mtl5,Bad,Sgol2,Sycp1,Larp7,Nek1,Tdrd6,Six6os1,Shcbp1l,Spata6,Sox30,Ythdc1,Mael,Piwil2,Ttll5,Tsga10,Setx,Ggnbp1,Tnp2,Usp42,Tex14,Kiaa1109,Cit,Nkapl,Osbp2,Rad18,Vipas39,Tsnax,Tdrd9,Hspa2,Sycp2,Eif4g3,Mybl1,Meikin,Tmf1,Ddx4,Hmga1-rs1,Sirt1,Spag8,Zfp541,Clgn,Arid4b,Tdrd1,Hfm1,Fsip2,Ttc26,Topaz1,Tdrd5,Spata18
GO:0022402	Cell cycle process	63	784	0.61	2.32e-17	16.6345	10090.ENSMUSP00000006565,10090.ENSMUSP00000006898,10090.ENSMUSP00000007800,10090.ENSMUSP00000009667,10090.ENSMUSP00000011493,10090.ENSMUSP00000019514,10090.ENSMUSP00000020099,10090.ENSMUSP00000020252,10090.ENSMUSP00000020687,10090.ENSMUSP00000021097,10090.ENSMUSP00000025562,10090.ENSMUSP00000027202,10090.ENSMUSP00000029448,10090.ENSMUSP00000030456,10090.ENSMUSP00000030636,10090.ENSMUSP00000031032…	Cdc20,Gmnn,Arpp19,Ush1c,Dmrtc2,Calm3,Cdk1,Sycp3,Pttg1,Recql5,Incenp,Sgol2,Sycp1,Nasp,Stmn1,Ppm1g,Mapre3,Cenpc1,Ankle2,Kif23,Topbp1,Six6os1,Rad9b,Shcbp1l,Cep72,Slx4,Pcm1,Ticrr,Mael,Anln,Rbbp8,Akap8l,Tex14,Fam175a,Cenpe,Mlf1,Mcm3,Nipbl,Cit,Espl1,Cenpj,Ccdc79,Npm1,Tdrd9,Hspa2,Sycp2,Numa1,Mybl1,Cep152,Cdc6,Meikin,Ddx4,Dsn1,Anp32b,Stk33,Ect2,Nuf2,Hfm1,Golga2,Tacc3,Kif3a,Morc2b,Sept10
GO:0006974	Cellular response to dna damage stimulus	57	667	0.64	1.22e-16	15.9136	10090.ENSMUSP00000005705,10090.ENSMUSP00000020099,10090.ENSMUSP00000020252,10090.ENSMUSP00000020687,10090.ENSMUSP00000021097,10090.ENSMUSP00000025241,10090.ENSMUSP00000025910,10090.ENSMUSP00000026292,10090.ENSMUSP00000027251,10090.ENSMUSP00000027421,10090.ENSMUSP00000027687,10090.ENSMUSP00000027933,10090.ENSMUSP00000029448,10090.ENSMUSP00000030623,10090.ENSMUSP00000031092,10090.ENSMUSP00000032130…	Trim28,Cdk1,Sycp3,Pttg1,Recql5,Ercc3,Bad,Huwe1,Rev1,Trip12,Ube2t,Dtl,Sycp1,Sfpq,Rfc1,Aplf,Pagr1a,Nek1,Atr,Topbp1,Six6os1,Rad9b,Ccar2,Slx4,Shprh,Ticrr,Atrip,Mael,Rbbp8,Topors,Acd,Rbbp6,Setx,Fam175a,Mcm3,Nipbl,Mdm4,Rad18,Npm1,Eya3,Mdc1,Lig3,Morc2a,Armt1,Hmga1-rs1,Sirt1,Usp47,Stk33,Rif1,Cep164,Fzr1,Ccdc13,Uimc1,Morc2b,Usp10,Wac,Spata18
GO:0007283	Spermatogenesis	50	542	0.67	1.32e-15	14.8794	10090.ENSMUSP00000002444,10090.ENSMUSP00000008051,10090.ENSMUSP00000011493,10090.ENSMUSP00000020252,10090.ENSMUSP00000023144,10090.ENSMUSP00000025840,10090.ENSMUSP00000025910,10090.ENSMUSP00000029448,10090.ENSMUSP00000029588,10090.ENSMUSP00000034065,10090.ENSMUSP00000035338,10090.ENSMUSP00000035376,10090.ENSMUSP00000036347,10090.ENSMUSP00000036964,10090.ENSMUSP00000037519,10090.ENSMUSP00000039133…	Rfx2,Cabs1,Dmrtc2,Sycp3,Prm1,Mtl5,Bad,Sycp1,Larp7,Nek1,Tdrd6,Six6os1,Shcbp1l,Spata6,Sox30,Ythdc1,Mael,Piwil2,Ttll5,Tsga10,Setx,Ggnbp1,Tnp2,Usp42,Kiaa1109,Cit,Nkapl,Osbp2,Rad18,Vipas39,Tsnax,Tdrd9,Hspa2,Eif4g3,Mybl1,Tmf1,Ddx4,Hmga1-rs1,Sirt1,Spag8,Zfp541,Clgn,Arid4b,Tdrd1,Hfm1,Fsip2,Ttc26,Topaz1,Tdrd5,Spata18
GO:0019219	Regulation of nucleobase-containing compound metabolic process	137	3265	0.33	1.67e-15	14.7773	10090.ENSMUSP00000002444,10090.ENSMUSP00000003527,10090.ENSMUSP00000003876,10090.ENSMUSP00000005705,10090.ENSMUSP00000006625,10090.ENSMUSP00000006898,10090.ENSMUSP00000008733,10090.ENSMUSP00000011493,10090.ENSMUSP00000015645,10090.ENSMUSP00000020420,10090.ENSMUSP00000020687,10090.ENSMUSP00000021097,10090.ENSMUSP00000021824,10090.ENSMUSP00000021929,10090.ENSMUSP00000022147,10090.ENSMUSP00000022793…	Rfx2,Supt5,Brd8,Trim28,Rbm14,Gmnn,Dnajb6,Dmrtc2,Hivep2,Ap3d1,Pttg1,Recql5,Nol8,Habp4,Smn1,Acin1,Cby1,Phf10,Eif2ak2,Ercc3,Mtl5,Pcgf6,Trip12,Ncl,Zc3h8,Mrgbp,Rbl1,Larp7,Psip1,Sfpq,Prkag2,Mapre3,Rfc1,Zfp326,Aplf,Tada3,Pagr1a,Atr,Six6os1,Cdk13,Ccar2,Sox30,Kat6a,Slx4,Ythdc1,Rbm42,Ticrr,Bclaf1,Smarca5,Gltscr1l,Rbm46,Mael,Rbbp8,Topors,Leo1,Phf2,Ppp1r13l,Acd,Fnip1,Sltm,Akap8l,Setx,Rbm15,Pcbp1,Zfp768,Fam17…
GO:0007276	Gamete generation	56	691	0.62	2.11e-15	14.6757	10090.ENSMUSP00000002444,10090.ENSMUSP00000008051,10090.ENSMUSP00000011493,10090.ENSMUSP00000020252,10090.ENSMUSP00000023144,10090.ENSMUSP00000025840,10090.ENSMUSP00000025910,10090.ENSMUSP00000027202,10090.ENSMUSP00000029448,10090.ENSMUSP00000029588,10090.ENSMUSP00000034065,10090.ENSMUSP00000035338,10090.ENSMUSP00000035376,10090.ENSMUSP00000036347,10090.ENSMUSP00000036964,10090.ENSMUSP00000037519…	Rfx2,Cabs1,Dmrtc2,Sycp3,Prm1,Mtl5,Bad,Sgol2,Sycp1,Larp7,Nek1,Tdrd6,Six6os1,Shcbp1l,Spata6,Sox30,Ythdc1,Mael,Piwil2,Ttll5,Tsga10,Setx,Ggnbp1,Tnp2,Usp42,Tex14,Kiaa1109,Cit,Nkapl,Osbp2,Rad18,Zcchc6,Vipas39,Tsnax,Tdrd9,Hspa2,Sycp2,Eif4g3,Mybl1,Meikin,Tmf1,Ddx4,Hmga1-rs1,Sirt1,Spag8,Zfp541,Clgn,Arid4b,Tdrd1,Hfm1,Fsip2,Morc2b,Ttc26,Topaz1,Tdrd5,Spata18
GO:0009987	Cellular process	345	13330	0.12	7.71e-15	14.1129	10090.ENSMUSP00000002444,10090.ENSMUSP00000002445,10090.ENSMUSP00000003527,10090.ENSMUSP00000003876,10090.ENSMUSP00000005003,10090.ENSMUSP00000005336,10090.ENSMUSP00000005705,10090.ENSMUSP00000006565,10090.ENSMUSP00000006625,10090.ENSMUSP00000006898,10090.ENSMUSP00000007800,10090.ENSMUSP00000008733,10090.ENSMUSP00000009667,10090.ENSMUSP00000011493,10090.ENSMUSP00000014220,10090.ENSMUSP00000015645…	Rfx2,Ranbp3,Supt5,Brd8,Lbr,Senp3,Trim28,Cdc20,Rbm14,Gmnn,Arpp19,Dnajb6,Ush1c,Dmrtc2,Tctex1d2,Hivep2,Pom121l2,Calm3,Cdk1,Sycp3,Ap3d1,Papolg,Pttg1,Smg8,Twistnb,Rnaseh1,Recql5,Tekt1,Sgpp1,Cap2,Nol8,Habp4,Smn1,Zc3h13,Diap3,Pbk,Acin1,Cby1,Prm1,Psmg1,Slc4a8,Sympk,Phf10,Pkmyt1,Eif2ak2,Ercc3,Prrc2a,Wdr33,Incenp,Pola2,Apba1,Mtl5,Bad,Stip1,Pcgf6,Arhgap19,Huwe1,Eps8l2,Lactb2,Sf3b1,Sgol2,Rev1,Prim2,Trip12,Nc…
GO:0000003	Reproduction	83	1469	0.46	8.21e-15	14.0857	10090.ENSMUSP00000002444,10090.ENSMUSP00000005705,10090.ENSMUSP00000008051,10090.ENSMUSP00000008733,10090.ENSMUSP00000011493,10090.ENSMUSP00000020252,10090.ENSMUSP00000020687,10090.ENSMUSP00000023144,10090.ENSMUSP00000025562,10090.ENSMUSP00000025840,10090.ENSMUSP00000025910,10090.ENSMUSP00000027202,10090.ENSMUSP00000029448,10090.ENSMUSP00000029588,10090.ENSMUSP00000031170,10090.ENSMUSP00000034065…	Rfx2,Trim28,Cabs1,Dnajb6,Dmrtc2,Sycp3,Pttg1,Prm1,Incenp,Mtl5,Bad,Sgol2,Sycp1,Larp7,Cenpc1,Nek1,Atr,Topbp1,Tdrd6,Six6os1,Shcbp1l,Spata6,Sox30,Slx4,Ythdc1,Tekt3,Mael,Rbbp8,Piwil2,Tiparp,Ttll5,Tsga10,Setx,Ggnbp1,Tnp2,Usp42,Rbm15,Tex14,E2f8,Nipbl,Kiaa1109,Cit,Espl1,Nkapl,Ccdc79,Osbp2,Rad18,Zcchc6,Vipas39,Tsnax,Tdrd9,Hspa2,Sycp2,Eif4g3,Numa1,Lin9,Adnp,Mybl1,Meikin,Tmf1,Smcp,Ddx4,Hmga1-rs1,Sirt1,Ube3a,…
GO:0006807	Nitrogen compound metabolic process	198	5878	0.24	1.79e-14	13.7471	10090.ENSMUSP00000003527,10090.ENSMUSP00000003876,10090.ENSMUSP00000005336,10090.ENSMUSP00000005705,10090.ENSMUSP00000006565,10090.ENSMUSP00000006625,10090.ENSMUSP00000015645,10090.ENSMUSP00000020099,10090.ENSMUSP00000020252,10090.ENSMUSP00000020513,10090.ENSMUSP00000020687,10090.ENSMUSP00000020801,10090.ENSMUSP00000020877,10090.ENSMUSP00000020959,10090.ENSMUSP00000021097,10090.ENSMUSP00000021450…	Supt5,Brd8,Senp3,Trim28,Cdc20,Rbm14,Hivep2,Cdk1,Sycp3,Papolg,Pttg1,Smg8,Twistnb,Rnaseh1,Recql5,Sgpp1,Nol8,Habp4,Smn1,Zc3h13,Pbk,Acin1,Sympk,Phf10,Pkmyt1,Eif2ak2,Ercc3,Wdr33,Incenp,Pola2,Bad,Pcgf6,Huwe1,Lactb2,Sf3b1,Rev1,Prim2,Trip12,Ube2t,Dtl,Cstf3,Zc3h8,Mrgbp,Sycp1,Larp7,Psip1,Sfpq,Prkag2,Ppm1g,Rfc1,Zfp326,Zfml,Aplf,Tada3,Pagr1a,Nek1,Atr,Nktr,Topbp1,Tdrd6,Six6os1,Cdk13,Rad9b,Esf1,Ccar2,Kat6a,Slx…
GO:0022414	Reproductive process	82	1467	0.46	2.25e-14	13.6478	10090.ENSMUSP00000002444,10090.ENSMUSP00000005705,10090.ENSMUSP00000008051,10090.ENSMUSP00000008733,10090.ENSMUSP00000011493,10090.ENSMUSP00000020252,10090.ENSMUSP00000020687,10090.ENSMUSP00000023144,10090.ENSMUSP00000025562,10090.ENSMUSP00000025840,10090.ENSMUSP00000025910,10090.ENSMUSP00000027202,10090.ENSMUSP00000029448,10090.ENSMUSP00000029588,10090.ENSMUSP00000031170,10090.ENSMUSP00000034065…	Rfx2,Trim28,Cabs1,Dnajb6,Dmrtc2,Sycp3,Pttg1,Prm1,Incenp,Mtl5,Bad,Sgol2,Sycp1,Larp7,Cenpc1,Nek1,Atr,Topbp1,Tdrd6,Six6os1,Shcbp1l,Spata6,Sox30,Slx4,Ythdc1,Tekt3,Mael,Rbbp8,Piwil2,Tiparp,Ttll5,Tsga10,Setx,Ggnbp1,Tnp2,Usp42,Rbm15,Tex14,E2f8,Nipbl,Kiaa1109,Cit,Espl1,Nkapl,Ccdc79,Osbp2,Rad18,Zcchc6,Vipas39,Tsnax,Tdrd9,Hspa2,Sycp2,Eif4g3,Numa1,Adnp,Mybl1,Meikin,Tmf1,Smcp,Ddx4,Hmga1-rs1,Sirt1,Ube3a,Med1,…
GO:0048609	Multicellular organismal reproductive process	60	848	0.56	3.72e-14	13.4295	10090.ENSMUSP00000002444,10090.ENSMUSP00000008051,10090.ENSMUSP00000011493,10090.ENSMUSP00000020252,10090.ENSMUSP00000023144,10090.ENSMUSP00000025840,10090.ENSMUSP00000025910,10090.ENSMUSP00000027202,10090.ENSMUSP00000029448,10090.ENSMUSP00000029588,10090.ENSMUSP00000034065,10090.ENSMUSP00000035338,10090.ENSMUSP00000035376,10090.ENSMUSP00000036347,10090.ENSMUSP00000036964,10090.ENSMUSP00000037519…	Rfx2,Cabs1,Dmrtc2,Sycp3,Prm1,Mtl5,Bad,Sgol2,Sycp1,Larp7,Nek1,Tdrd6,Six6os1,Shcbp1l,Spata6,Sox30,Ythdc1,Tekt3,Mael,Piwil2,Ttll5,Tsga10,Setx,Ggnbp1,Tnp2,Usp42,Tex14,Kiaa1109,Cit,Nkapl,Osbp2,Rad18,Zcchc6,Vipas39,Tsnax,Tdrd9,Hspa2,Sycp2,Eif4g3,Adnp,Mybl1,Meikin,Tmf1,Smcp,Ddx4,Hmga1-rs1,Sirt1,Med1,Spag8,Zfp541,Clgn,Arid4b,Tdrd1,Hfm1,Fsip2,Morc2b,Ttc26,Topaz1,Tdrd5,Spata18
GO:0006325	Chromatin organization	51	625	0.62	4.67e-14	13.3307	10090.ENSMUSP00000003876,10090.ENSMUSP00000005705,10090.ENSMUSP00000006625,10090.ENSMUSP00000020099,10090.ENSMUSP00000020252,10090.ENSMUSP00000024657,10090.ENSMUSP00000025562,10090.ENSMUSP00000026032,10090.ENSMUSP00000026292,10090.ENSMUSP00000029085,10090.ENSMUSP00000029170,10090.ENSMUSP00000029448,10090.ENSMUSP00000030456,10090.ENSMUSP00000030623,10090.ENSMUSP00000032410,10090.ENSMUSP00000032918…	Brd8,Trim28,Rbm14,Cdk1,Sycp3,Phf10,Incenp,Pcgf6,Huwe1,Mrgbp,Rbl1,Sycp1,Nasp,Sfpq,Tada3,Pagr1a,Tspyl4,Kat6a,Shprh,Baz1a,Msl1,Smarca5,Leo1,Phf2,Ep400,Tnp2,Fam175a,Whsc1,Nipbl,Nap1l4,Npm1,Eya3,Morc2a,Brd9,Anp32b,Hmga1-rs1,Sirt1,Brd1,Arid4b,Hat1,Rif1,Whsc1l1,Uimc1,Arid1a,Vprbp,Baz2a,Sin3a,Wac,Fam172a,Jarid2,Rsbn1
GO:0060255	Regulation of macromolecule metabolic process	190	5618	0.24	8.12e-14	13.0904	10090.ENSMUSP00000002444,10090.ENSMUSP00000003527,10090.ENSMUSP00000003876,10090.ENSMUSP00000005705,10090.ENSMUSP00000006565,10090.ENSMUSP00000006625,10090.ENSMUSP00000006898,10090.ENSMUSP00000007800,10090.ENSMUSP00000008733,10090.ENSMUSP00000011493,10090.ENSMUSP00000015645,10090.ENSMUSP00000019514,10090.ENSMUSP00000020099,10090.ENSMUSP00000020420,10090.ENSMUSP00000020687,10090.ENSMUSP00000020801…	Rfx2,Supt5,Brd8,Trim28,Cdc20,Rbm14,Gmnn,Arpp19,Dnajb6,Dmrtc2,Hivep2,Calm3,Cdk1,Ap3d1,Pttg1,Smg8,Recql5,Nol8,Habp4,Smn1,Pbk,Acin1,Cby1,Sympk,Phf10,Eif2ak2,Ercc3,Incenp,Apba1,Mtl5,Bad,Pcgf6,Huwe1,Trip12,Ncl,Dtl,Zc3h8,Mrgbp,Rbl1,Larp7,Psip1,Sfpq,Prkag2,Mapre3,Rfc1,Zfp326,Ankle2,Aplf,Tada3,Pagr1a,Nek1,Atr,Six6os1,Cdk13,Ccar2,Sox30,Kat6a,Slx4,Ythdc1,Edc4,Rbm42,Ticrr,Bclaf1,Smarca5,Gltscr1l,Rbm46,Mael,…
GO:0006281	DNA repair	42	435	0.69	1.26e-13	12.8996	10090.ENSMUSP00000005705,10090.ENSMUSP00000020252,10090.ENSMUSP00000020687,10090.ENSMUSP00000021097,10090.ENSMUSP00000025241,10090.ENSMUSP00000026292,10090.ENSMUSP00000027251,10090.ENSMUSP00000027421,10090.ENSMUSP00000027687,10090.ENSMUSP00000027933,10090.ENSMUSP00000029448,10090.ENSMUSP00000030623,10090.ENSMUSP00000031092,10090.ENSMUSP00000032130,10090.ENSMUSP00000032918,10090.ENSMUSP00000034980…	Trim28,Sycp3,Pttg1,Recql5,Ercc3,Huwe1,Rev1,Trip12,Ube2t,Dtl,Sycp1,Sfpq,Rfc1,Aplf,Pagr1a,Atr,Topbp1,Six6os1,Rad9b,Slx4,Shprh,Ticrr,Atrip,Rbbp8,Setx,Fam175a,Mcm3,Nipbl,Rad18,Npm1,Eya3,Mdc1,Lig3,Hmga1-rs1,Sirt1,Usp47,Rif1,Cep164,Fzr1,Uimc1,Morc2b,Usp10
GO:0006397	mRNA processing	40	399	0.71	2.05e-13	12.6882	10090.ENSMUSP00000020513,10090.ENSMUSP00000021929,10090.ENSMUSP00000022147,10090.ENSMUSP00000022577,10090.ENSMUSP00000022793,10090.ENSMUSP00000023882,10090.ENSMUSP00000025264,10090.ENSMUSP00000027127,10090.ENSMUSP00000028599,10090.ENSMUSP00000029588,10090.ENSMUSP00000030207,10090.ENSMUSP00000030623,10090.ENSMUSP00000031227,10090.ENSMUSP00000035338,10090.ENSMUSP00000036013,10090.ENSMUSP00000036924…	Papolg,Habp4,Smn1,Zc3h13,Acin1,Sympk,Wdr33,Sf3b1,Cstf3,Larp7,Psip1,Sfpq,Zfp326,Tdrd6,Cdk13,Ccar2,Ythdc1,Leo1,Rbbp6,Akap8l,Setx,Pcbp1,Slbp,Srsf12,Zcchc6,Thrap3,Srpk2,Srrm2,Srsf2,Zc3h3,Srsf10,Zranb2,Cdk12,Hnrnpc,Fip1l1,Srrm1,Rbm20,Cd2bp2,Fam172a,Rbm5
GO:0019953	Sexual reproduction	58	834	0.55	2.12e-13	12.6737	10090.ENSMUSP00000002444,10090.ENSMUSP00000008051,10090.ENSMUSP00000011493,10090.ENSMUSP00000020252,10090.ENSMUSP00000023144,10090.ENSMUSP00000025840,10090.ENSMUSP00000025910,10090.ENSMUSP00000027202,10090.ENSMUSP00000029448,10090.ENSMUSP00000029588,10090.ENSMUSP00000034065,10090.ENSMUSP00000035338,10090.ENSMUSP00000035376,10090.ENSMUSP00000036347,10090.ENSMUSP00000036964,10090.ENSMUSP00000037519…	Rfx2,Cabs1,Dmrtc2,Sycp3,Prm1,Mtl5,Bad,Sgol2,Sycp1,Larp7,Nek1,Tdrd6,Six6os1,Shcbp1l,Spata6,Sox30,Ythdc1,Mael,Piwil2,Ttll5,Tsga10,Setx,Ggnbp1,Tnp2,Usp42,Tex14,Kiaa1109,Cit,Nkapl,Osbp2,Rad18,Zcchc6,Vipas39,Tsnax,Tdrd9,Hspa2,Sycp2,Eif4g3,Mybl1,Meikin,Tmf1,Smcp,Ddx4,Hmga1-rs1,Sirt1,Ube3a,Spag8,Zfp541,Clgn,Arid4b,Tdrd1,Hfm1,Fsip2,Morc2b,Ttc26,Topaz1,Tdrd5,Spata18
GO:0051252	Regulation of rna metabolic process	125	3027	0.32	2.12e-13	12.6737	10090.ENSMUSP00000002444,10090.ENSMUSP00000003527,10090.ENSMUSP00000003876,10090.ENSMUSP00000005705,10090.ENSMUSP00000006625,10090.ENSMUSP00000006898,10090.ENSMUSP00000008733,10090.ENSMUSP00000011493,10090.ENSMUSP00000015645,10090.ENSMUSP00000020420,10090.ENSMUSP00000020687,10090.ENSMUSP00000021097,10090.ENSMUSP00000021824,10090.ENSMUSP00000021929,10090.ENSMUSP00000022147,10090.ENSMUSP00000022793…	Rfx2,Supt5,Brd8,Trim28,Rbm14,Gmnn,Dnajb6,Dmrtc2,Hivep2,Ap3d1,Pttg1,Recql5,Nol8,Habp4,Smn1,Acin1,Cby1,Phf10,Eif2ak2,Ercc3,Mtl5,Pcgf6,Ncl,Zc3h8,Mrgbp,Rbl1,Larp7,Psip1,Sfpq,Mapre3,Rfc1,Zfp326,Tada3,Pagr1a,Six6os1,Cdk13,Ccar2,Sox30,Kat6a,Ythdc1,Rbm42,Bclaf1,Smarca5,Gltscr1l,Rbm46,Mael,Rbbp8,Topors,Leo1,Phf2,Ppp1r13l,Fnip1,Sltm,Akap8l,Setx,Rbm15,Pcbp1,Zfp768,E2f8,Mlf1,Zfp507,Whsc1,Nipbl,Angel2,Ilf3,Ce…
GO:0044260	Cellular macromolecule metabolic process	154	4161	0.28	2.13e-13	12.6716	10090.ENSMUSP00000003527,10090.ENSMUSP00000003876,10090.ENSMUSP00000005336,10090.ENSMUSP00000005705,10090.ENSMUSP00000006565,10090.ENSMUSP00000006625,10090.ENSMUSP00000006898,10090.ENSMUSP00000015645,10090.ENSMUSP00000020099,10090.ENSMUSP00000020252,10090.ENSMUSP00000020687,10090.ENSMUSP00000020801,10090.ENSMUSP00000020877,10090.ENSMUSP00000020959,10090.ENSMUSP00000021097,10090.ENSMUSP00000022147…	Supt5,Brd8,Senp3,Trim28,Cdc20,Rbm14,Gmnn,Hivep2,Cdk1,Sycp3,Pttg1,Smg8,Twistnb,Rnaseh1,Recql5,Smn1,Zc3h13,Pbk,Phf10,Pkmyt1,Eif2ak2,Ercc3,Incenp,Pola2,Pcgf6,Huwe1,Rev1,Prim2,Trip12,Ube2t,Dtl,Zc3h8,Mrgbp,Sycp1,Larp7,Nasp,Sfpq,Prkag2,Ppm1g,Rfc1,Aplf,Tada3,Pagr1a,Nek1,Atr,Nktr,Topbp1,Six6os1,Cdk13,Rad9b,Kat6a,Slx4,Edc4,Shprh,Baz1a,Ticrr,Trmt10a,Ssh2,Msl1,Smarca5,Atrip,Mael,Ppig,Rbbp8,Rpl37,Topors,Leo1…
GO:0051171	Regulation of nitrogen compound metabolic process	177	5126	0.25	2.46e-13	12.6091	10090.ENSMUSP00000002444,10090.ENSMUSP00000003527,10090.ENSMUSP00000003876,10090.ENSMUSP00000005705,10090.ENSMUSP00000006565,10090.ENSMUSP00000006625,10090.ENSMUSP00000006898,10090.ENSMUSP00000007800,10090.ENSMUSP00000008733,10090.ENSMUSP00000011493,10090.ENSMUSP00000015645,10090.ENSMUSP00000019514,10090.ENSMUSP00000020420,10090.ENSMUSP00000020687,10090.ENSMUSP00000020801,10090.ENSMUSP00000021097…	Rfx2,Supt5,Brd8,Trim28,Cdc20,Rbm14,Gmnn,Arpp19,Dnajb6,Dmrtc2,Hivep2,Calm3,Ap3d1,Pttg1,Smg8,Recql5,Nol8,Habp4,Smn1,Pbk,Acin1,Cby1,Sympk,Phf10,Eif2ak2,Ercc3,Incenp,Mtl5,Bad,Pcgf6,Huwe1,Trip12,Ncl,Dtl,Zc3h8,Mrgbp,Rbl1,Larp7,Psip1,Sfpq,Prkag2,Mapre3,Rfc1,Zfp326,Ankle2,Aplf,Tada3,Pagr1a,Nek1,Atr,Six6os1,Cdk13,Ccar2,Sox30,Kat6a,Slx4,Ythdc1,Rbm42,Ticrr,Bclaf1,Smarca5,Gltscr1l,Rbm46,Mael,Rbbp8,Topors,Leo…
GO:0051321	Meiotic cell cycle	31	229	0.84	2.65e-13	12.5768	10090.ENSMUSP00000011493,10090.ENSMUSP00000020252,10090.ENSMUSP00000020687,10090.ENSMUSP00000025562,10090.ENSMUSP00000027202,10090.ENSMUSP00000029448,10090.ENSMUSP00000031170,10090.ENSMUSP00000035164,10090.ENSMUSP00000035376,10090.ENSMUSP00000036347,10090.ENSMUSP00000038871,10090.ENSMUSP00000045828,10090.ENSMUSP00000046255,10090.ENSMUSP00000047385,10090.ENSMUSP00000054444,10090.ENSMUSP00000064465…	Dmrtc2,Sycp3,Pttg1,Incenp,Sgol2,Sycp1,Cenpc1,Topbp1,Six6os1,Shcbp1l,Slx4,Mael,Rbbp8,Piwil2,Tex14,Espl1,Ccdc79,Tdrd9,Hspa2,Sycp2,Numa1,Mybl1,Meikin,Ddx4,Clgn,Nuf2,Tdrd1,Hfm1,Golga2,Zfp318,Morc2b
GO:0000280	Nuclear division	33	273	0.79	5.7e-13	12.2441	10090.ENSMUSP00000006565,10090.ENSMUSP00000011493,10090.ENSMUSP00000020252,10090.ENSMUSP00000020687,10090.ENSMUSP00000025562,10090.ENSMUSP00000027202,10090.ENSMUSP00000029448,10090.ENSMUSP00000031170,10090.ENSMUSP00000034815,10090.ENSMUSP00000035164,10090.ENSMUSP00000035376,10090.ENSMUSP00000036347,10090.ENSMUSP00000038871,10090.ENSMUSP00000045828,10090.ENSMUSP00000051389,10090.ENSMUSP00000054444…	Cdc20,Dmrtc2,Sycp3,Pttg1,Incenp,Sgol2,Sycp1,Cenpc1,Kif23,Topbp1,Six6os1,Shcbp1l,Slx4,Mael,Akap8l,Tex14,Fam175a,Cenpe,Nipbl,Cit,Espl1,Ccdc79,Tdrd9,Hspa2,Sycp2,Mybl1,Meikin,Ddx4,Dsn1,Nuf2,Hfm1,Golga2,Morc2b
GO:0044703	Multi-organism reproductive process	63	1000	0.51	6.96e-13	12.1574	10090.ENSMUSP00000002444,10090.ENSMUSP00000005705,10090.ENSMUSP00000008051,10090.ENSMUSP00000011493,10090.ENSMUSP00000020252,10090.ENSMUSP00000023144,10090.ENSMUSP00000025840,10090.ENSMUSP00000025910,10090.ENSMUSP00000027202,10090.ENSMUSP00000029448,10090.ENSMUSP00000029588,10090.ENSMUSP00000034065,10090.ENSMUSP00000034980,10090.ENSMUSP00000035338,10090.ENSMUSP00000035376,10090.ENSMUSP00000036347…	Rfx2,Trim28,Cabs1,Dmrtc2,Sycp3,Prm1,Mtl5,Bad,Sgol2,Sycp1,Larp7,Nek1,Atr,Tdrd6,Six6os1,Shcbp1l,Spata6,Sox30,Ythdc1,Tekt3,Mael,Piwil2,Ttll5,Tsga10,Setx,Ggnbp1,Tnp2,Usp42,Tex14,Kiaa1109,Cit,Nkapl,Osbp2,Rad18,Zcchc6,Vipas39,Tsnax,Tdrd9,Hspa2,Sycp2,Eif4g3,Mybl1,Meikin,Tmf1,Smcp,Ddx4,Hmga1-rs1,Sirt1,Ube3a,Med1,Spag8,Zfp541,Clgn,Arid4b,Tdrd1,Hfm1,Fsip2,Arid1a,Morc2b,Ttc26,Topaz1,Tdrd5,Spata18
GO:0048285	Organelle fission	34	304	0.76	1.56e-12	11.8069	10090.ENSMUSP00000006565,10090.ENSMUSP00000011493,10090.ENSMUSP00000020252,10090.ENSMUSP00000020687,10090.ENSMUSP00000025562,10090.ENSMUSP00000027202,10090.ENSMUSP00000029448,10090.ENSMUSP00000031170,10090.ENSMUSP00000034815,10090.ENSMUSP00000035164,10090.ENSMUSP00000035376,10090.ENSMUSP00000036347,10090.ENSMUSP00000038871,10090.ENSMUSP00000045828,10090.ENSMUSP00000051389,10090.ENSMUSP00000051800…	Cdc20,Dmrtc2,Sycp3,Pttg1,Incenp,Sgol2,Sycp1,Cenpc1,Kif23,Topbp1,Six6os1,Shcbp1l,Slx4,Mael,Akap8l,Ggnbp1,Tex14,Fam175a,Cenpe,Nipbl,Cit,Espl1,Ccdc79,Tdrd9,Hspa2,Sycp2,Mybl1,Meikin,Ddx4,Dsn1,Nuf2,Hfm1,Golga2,Morc2b
GO:0080090	Regulation of primary metabolic process	178	5290	0.23	2.01e-12	11.6968	10090.ENSMUSP00000002444,10090.ENSMUSP00000003527,10090.ENSMUSP00000003876,10090.ENSMUSP00000005705,10090.ENSMUSP00000006565,10090.ENSMUSP00000006625,10090.ENSMUSP00000006898,10090.ENSMUSP00000007800,10090.ENSMUSP00000008733,10090.ENSMUSP00000011493,10090.ENSMUSP00000015645,10090.ENSMUSP00000019514,10090.ENSMUSP00000020420,10090.ENSMUSP00000020687,10090.ENSMUSP00000020801,10090.ENSMUSP00000021097…	Rfx2,Supt5,Brd8,Trim28,Cdc20,Rbm14,Gmnn,Arpp19,Dnajb6,Dmrtc2,Hivep2,Calm3,Ap3d1,Pttg1,Smg8,Recql5,Nol8,Habp4,Smn1,Pbk,Acin1,Cby1,Sympk,Phf10,Eif2ak2,Ercc3,Incenp,Mtl5,Bad,Pcgf6,Huwe1,Trip12,Ncl,Dtl,Zc3h8,Mrgbp,Rbl1,Larp7,Psip1,Sfpq,Prkag2,Mapre3,Rfc1,Zfp326,Ankle2,Aplf,Tada3,Pagr1a,Nek1,Atr,Six6os1,Cdk13,Ccar2,Sox30,Kat6a,Slx4,Ythdc1,Rbm42,Ticrr,Bclaf1,Smarca5,Gltscr1l,Rbm46,Mael,Rbbp8,Topors,Leo…
GO:0031323	Regulation of cellular metabolic process	182	5479	0.23	2.6e-12	11.585	10090.ENSMUSP00000002444,10090.ENSMUSP00000003527,10090.ENSMUSP00000003876,10090.ENSMUSP00000005705,10090.ENSMUSP00000006565,10090.ENSMUSP00000006625,10090.ENSMUSP00000006898,10090.ENSMUSP00000007800,10090.ENSMUSP00000008733,10090.ENSMUSP00000011493,10090.ENSMUSP00000015645,10090.ENSMUSP00000019514,10090.ENSMUSP00000020099,10090.ENSMUSP00000020420,10090.ENSMUSP00000020687,10090.ENSMUSP00000020801…	Rfx2,Supt5,Brd8,Trim28,Cdc20,Rbm14,Gmnn,Arpp19,Dnajb6,Dmrtc2,Hivep2,Calm3,Cdk1,Ap3d1,Pttg1,Smg8,Recql5,Nol8,Habp4,Smn1,Pbk,Acin1,Cby1,Sympk,Phf10,Pkmyt1,Eif2ak2,Ercc3,Incenp,Mtl5,Bad,Pcgf6,Huwe1,Trip12,Ncl,Zc3h8,Mrgbp,Rbl1,Larp7,Psip1,Sfpq,Prkag2,Mapre3,Rfc1,Zfp326,Ankle2,Aplf,Tada3,Pagr1a,Nek1,Atr,Six6os1,Cdk13,Ccar2,Sox30,Kat6a,Slx4,Ythdc1,Rbm42,Ticrr,Bclaf1,Smarca5,Gltscr1l,Rbm46,Mael,Rbbp8,To…
GO:0003006	Developmental process involved in reproduction	62	1005	0.5	2.61e-12	11.5834	10090.ENSMUSP00000002444,10090.ENSMUSP00000005705,10090.ENSMUSP00000008051,10090.ENSMUSP00000008733,10090.ENSMUSP00000011493,10090.ENSMUSP00000020252,10090.ENSMUSP00000023144,10090.ENSMUSP00000025840,10090.ENSMUSP00000025910,10090.ENSMUSP00000029448,10090.ENSMUSP00000029588,10090.ENSMUSP00000034065,10090.ENSMUSP00000035338,10090.ENSMUSP00000035376,10090.ENSMUSP00000036347,10090.ENSMUSP00000036964…	Rfx2,Trim28,Cabs1,Dnajb6,Dmrtc2,Sycp3,Prm1,Mtl5,Bad,Sycp1,Larp7,Nek1,Tdrd6,Six6os1,Shcbp1l,Spata6,Sox30,Ythdc1,Mael,Piwil2,Tiparp,Ttll5,Tsga10,Setx,Ggnbp1,Tnp2,Usp42,Rbm15,E2f8,Nipbl,Kiaa1109,Cit,Nkapl,Osbp2,Rad18,Zcchc6,Vipas39,Tsnax,Tdrd9,Hspa2,Sycp2,Eif4g3,Mybl1,Tmf1,Ddx4,Hmga1-rs1,Sirt1,Ube3a,Med1,Spag8,Zfp541,Clgn,Arid4b,Tdrd1,Hfm1,Fsip2,Arid1a,Ttc26,Topaz1,Tdrd5,Spata18,Birc2
GO:0044238	Primary metabolic process	202	6369	0.21	2.61e-12	11.5834	10090.ENSMUSP00000003527,10090.ENSMUSP00000003876,10090.ENSMUSP00000005003,10090.ENSMUSP00000005336,10090.ENSMUSP00000005705,10090.ENSMUSP00000006565,10090.ENSMUSP00000006625,10090.ENSMUSP00000015645,10090.ENSMUSP00000020099,10090.ENSMUSP00000020252,10090.ENSMUSP00000020513,10090.ENSMUSP00000020687,10090.ENSMUSP00000020801,10090.ENSMUSP00000020877,10090.ENSMUSP00000020959,10090.ENSMUSP00000021097…	Supt5,Brd8,Lbr,Senp3,Trim28,Cdc20,Rbm14,Hivep2,Cdk1,Sycp3,Papolg,Pttg1,Smg8,Twistnb,Rnaseh1,Recql5,Sgpp1,Nol8,Habp4,Smn1,Zc3h13,Pbk,Acin1,Sympk,Phf10,Pkmyt1,Eif2ak2,Ercc3,Wdr33,Incenp,Pola2,Bad,Pcgf6,Huwe1,Lactb2,Sf3b1,Rev1,Prim2,Trip12,Ube2t,Dtl,Cstf3,Zc3h8,Mrgbp,Sycp1,Larp7,Psip1,Sfpq,Prkag2,Ppm1g,Rfc1,Zfp326,Zfml,Aplf,Tada3,Pagr1a,Nek1,Atr,Nktr,Topbp1,Tdrd6,Six6os1,Cdk13,Rad9b,Esf1,Ccar2,Kat6a…
GO:0006396	RNA processing	52	735	0.56	3.16e-12	11.5003	10090.ENSMUSP00000020513,10090.ENSMUSP00000021824,10090.ENSMUSP00000021929,10090.ENSMUSP00000022147,10090.ENSMUSP00000022577,10090.ENSMUSP00000022793,10090.ENSMUSP00000023882,10090.ENSMUSP00000025264,10090.ENSMUSP00000027127,10090.ENSMUSP00000028599,10090.ENSMUSP00000029588,10090.ENSMUSP00000030207,10090.ENSMUSP00000030623,10090.ENSMUSP00000031227,10090.ENSMUSP00000032088,10090.ENSMUSP00000035338…	Papolg,Nol8,Habp4,Smn1,Zc3h13,Acin1,Sympk,Wdr33,Sf3b1,Cstf3,Larp7,Psip1,Sfpq,Zfp326,Zfml,Tdrd6,Cdk13,Esf1,Ccar2,Ythdc1,Trmt10a,Leo1,Piwil2,Rbbp6,Akap8l,Setx,Pcbp1,Slbp,Srsf12,Zcchc6,Npm1,Cherp,U2surp,Thrap3,Srpk2,Srrm2,Srsf2,Zc3h3,Kti12,Srsf10,Zranb2,Cdk12,Hnrnpc,Fip1l1,Urb1,Srrm1,Drosha,Rbm20,Rpl14,Cd2bp2,Fam172a,Rbm5
GO:0140013	Meiotic nuclear division	25	154	0.92	3.72e-12	11.4295	10090.ENSMUSP00000011493,10090.ENSMUSP00000020252,10090.ENSMUSP00000020687,10090.ENSMUSP00000025562,10090.ENSMUSP00000027202,10090.ENSMUSP00000029448,10090.ENSMUSP00000031170,10090.ENSMUSP00000035164,10090.ENSMUSP00000035376,10090.ENSMUSP00000036347,10090.ENSMUSP00000038871,10090.ENSMUSP00000045828,10090.ENSMUSP00000054444,10090.ENSMUSP00000064465,10090.ENSMUSP00000067324,10090.ENSMUSP00000078022…	Dmrtc2,Sycp3,Pttg1,Incenp,Sgol2,Sycp1,Cenpc1,Topbp1,Six6os1,Shcbp1l,Slx4,Mael,Tex14,Espl1,Ccdc79,Tdrd9,Hspa2,Sycp2,Mybl1,Meikin,Ddx4,Nuf2,Hfm1,Golga2,Morc2b
GO:0019222	Regulation of metabolic process	195	6085	0.21	4.03e-12	11.3947	10090.ENSMUSP00000002444,10090.ENSMUSP00000003527,10090.ENSMUSP00000003876,10090.ENSMUSP00000005705,10090.ENSMUSP00000006565,10090.ENSMUSP00000006625,10090.ENSMUSP00000006898,10090.ENSMUSP00000007800,10090.ENSMUSP00000008733,10090.ENSMUSP00000011493,10090.ENSMUSP00000015645,10090.ENSMUSP00000019514,10090.ENSMUSP00000020099,10090.ENSMUSP00000020420,10090.ENSMUSP00000020687,10090.ENSMUSP00000020801…	Rfx2,Supt5,Brd8,Trim28,Cdc20,Rbm14,Gmnn,Arpp19,Dnajb6,Dmrtc2,Hivep2,Calm3,Cdk1,Ap3d1,Pttg1,Smg8,Recql5,Nol8,Habp4,Smn1,Pbk,Acin1,Cby1,Sympk,Phf10,Pkmyt1,Eif2ak2,Ercc3,Incenp,Apba1,Mtl5,Bad,Pcgf6,Huwe1,Trip12,Ncl,Dtl,Zc3h8,Mrgbp,Rbl1,Larp7,Psip1,Sfpq,Prkag2,Mapre3,Rfc1,Zfp326,Ankle2,Aplf,Tada3,Pagr1a,Nek1,Atr,Six6os1,Cdk13,Ccar2,Sox30,Kat6a,Slx4,Ythdc1,Edc4,Rbm42,Ticrr,Bclaf1,Smarca5,Gltscr1l,Rbm4…
GO:0016071	mRNA metabolic process	43	516	0.63	4.19e-12	11.3778	10090.ENSMUSP00000020513,10090.ENSMUSP00000020801,10090.ENSMUSP00000021929,10090.ENSMUSP00000022147,10090.ENSMUSP00000022577,10090.ENSMUSP00000022793,10090.ENSMUSP00000023882,10090.ENSMUSP00000025264,10090.ENSMUSP00000027127,10090.ENSMUSP00000028599,10090.ENSMUSP00000029588,10090.ENSMUSP00000030207,10090.ENSMUSP00000030623,10090.ENSMUSP00000031227,10090.ENSMUSP00000035338,10090.ENSMUSP00000036013…	Papolg,Smg8,Habp4,Smn1,Zc3h13,Acin1,Sympk,Wdr33,Sf3b1,Cstf3,Larp7,Psip1,Sfpq,Zfp326,Tdrd6,Cdk13,Ccar2,Ythdc1,Edc4,Leo1,Rbbp6,Akap8l,Setx,Pcbp1,Slbp,Srsf12,Zcchc6,Thrap3,Srpk2,Srrm2,Srsf2,Zc3h3,Srsf10,Zranb2,Cdk12,Med1,Hnrnpc,Fip1l1,Srrm1,Rbm20,Cd2bp2,Fam172a,Rbm5
GO:0010468	Regulation of gene expression	147	4041	0.27	4.33e-12	11.3635	10090.ENSMUSP00000002444,10090.ENSMUSP00000003527,10090.ENSMUSP00000003876,10090.ENSMUSP00000005705,10090.ENSMUSP00000006625,10090.ENSMUSP00000006898,10090.ENSMUSP00000008733,10090.ENSMUSP00000011493,10090.ENSMUSP00000015645,10090.ENSMUSP00000020099,10090.ENSMUSP00000020420,10090.ENSMUSP00000020687,10090.ENSMUSP00000020801,10090.ENSMUSP00000021097,10090.ENSMUSP00000021929,10090.ENSMUSP00000022147…	Rfx2,Supt5,Brd8,Trim28,Rbm14,Gmnn,Dnajb6,Dmrtc2,Hivep2,Cdk1,Ap3d1,Pttg1,Smg8,Recql5,Habp4,Smn1,Acin1,Cby1,Phf10,Eif2ak2,Ercc3,Apba1,Mtl5,Pcgf6,Huwe1,Ncl,Zc3h8,Mrgbp,Rbl1,Larp7,Psip1,Sfpq,Mapre3,Rfc1,Zfp326,Tada3,Pagr1a,Six6os1,Cdk13,Ccar2,Sox30,Kat6a,Ythdc1,Edc4,Rbm42,Bclaf1,Smarca5,Gltscr1l,Rbm46,Mael,Topors,Leo1,Ppp1r11,Phf2,Piwil2,Ppp1r13l,Tiparp,Fnip1,Sltm,Akap8l,Setx,Zfp646,Tnp2,Rbm15,Poldip…
GO:0000278	Mitotic cell cycle	43	527	0.62	7.94e-12	11.1002	10090.ENSMUSP00000006565,10090.ENSMUSP00000007800,10090.ENSMUSP00000009667,10090.ENSMUSP00000019514,10090.ENSMUSP00000020099,10090.ENSMUSP00000020252,10090.ENSMUSP00000020687,10090.ENSMUSP00000021097,10090.ENSMUSP00000022612,10090.ENSMUSP00000025562,10090.ENSMUSP00000027202,10090.ENSMUSP00000030456,10090.ENSMUSP00000030636,10090.ENSMUSP00000031170,10090.ENSMUSP00000031474,10090.ENSMUSP00000032410…	Cdc20,Arpp19,Ush1c,Calm3,Cdk1,Sycp3,Pttg1,Recql5,Pbk,Incenp,Sgol2,Nasp,Stmn1,Cenpc1,Ankle2,Tada3,Kif23,Topbp1,Rad9b,Ticrr,Anln,Rbbp8,Akap8l,Tex14,Fam175a,E2f8,Cenpe,Mcm3,Nipbl,Cit,Espl1,Cenpj,Numa1,Mybl1,Srsf2,Cdc6,Dsn1,Anp32b,Stk33,Ect2,Nuf2,Golga2,Tacc3
GO:0051726	Regulation of cell cycle	61	1016	0.49	1.18e-11	10.9281	10090.ENSMUSP00000006565,10090.ENSMUSP00000006625,10090.ENSMUSP00000006898,10090.ENSMUSP00000019514,10090.ENSMUSP00000020099,10090.ENSMUSP00000020687,10090.ENSMUSP00000025241,10090.ENSMUSP00000025562,10090.ENSMUSP00000027202,10090.ENSMUSP00000027933,10090.ENSMUSP00000029170,10090.ENSMUSP00000029588,10090.ENSMUSP00000030623,10090.ENSMUSP00000031032,10090.ENSMUSP00000031058,10090.ENSMUSP00000032918…	Cdc20,Rbm14,Gmnn,Calm3,Cdk1,Pttg1,Ercc3,Incenp,Sgol2,Dtl,Rbl1,Larp7,Sfpq,Ppm1g,Mapre3,Pagr1a,Nek1,Kif23,Atr,Topbp1,Cdk13,Rad9b,Ccar2,Ticrr,Atrip,Piwil2,Tex14,Fam175a,E2f8,Cenpe,Mlf1,Nipbl,Cit,Angel2,Cenpj,Mdm4,Mok,Npm1,Hspa2,Eif4g3,Numa1,Lin9,Srpk2,Cdc6,Flcn,Anp32b,Sirt1,Usp47,Stk33,Cdk12,Med1,Ect2,Tacc3,Fzr1,Uimc1,Cep295,Mdm1,Sin3a,Wac,Topaz1,Birc2
GO:0044237	Cellular metabolic process	201	6445	0.2	1.59e-11	10.7986	10090.ENSMUSP00000003527,10090.ENSMUSP00000003876,10090.ENSMUSP00000005336,10090.ENSMUSP00000005705,10090.ENSMUSP00000006565,10090.ENSMUSP00000006625,10090.ENSMUSP00000006898,10090.ENSMUSP00000015645,10090.ENSMUSP00000020099,10090.ENSMUSP00000020252,10090.ENSMUSP00000020513,10090.ENSMUSP00000020687,10090.ENSMUSP00000020801,10090.ENSMUSP00000020877,10090.ENSMUSP00000020959,10090.ENSMUSP00000021097…	Supt5,Brd8,Senp3,Trim28,Cdc20,Rbm14,Gmnn,Hivep2,Cdk1,Sycp3,Papolg,Pttg1,Smg8,Twistnb,Rnaseh1,Recql5,Sgpp1,Nol8,Habp4,Smn1,Zc3h13,Pbk,Acin1,Sympk,Phf10,Pkmyt1,Eif2ak2,Ercc3,Wdr33,Incenp,Pola2,Bad,Pcgf6,Huwe1,Lactb2,Sf3b1,Rev1,Prim2,Trip12,Ube2t,Dtl,Cstf3,Zc3h8,Mrgbp,Sycp1,Larp7,Psip1,Nasp,Sfpq,Prkag2,Ppm1g,Rfc1,Zfp326,Zfml,Aplf,Tada3,Pagr1a,Nek1,Atr,Nktr,Topbp1,Tdrd6,Six6os1,Cdk13,Rad9b,Esf1,Ccar2…
GO:0071704	Organic substance metabolic process	209	6824	0.19	1.9e-11	10.7212	10090.ENSMUSP00000003527,10090.ENSMUSP00000003876,10090.ENSMUSP00000005003,10090.ENSMUSP00000005336,10090.ENSMUSP00000005705,10090.ENSMUSP00000006565,10090.ENSMUSP00000006625,10090.ENSMUSP00000006898,10090.ENSMUSP00000015645,10090.ENSMUSP00000020099,10090.ENSMUSP00000020252,10090.ENSMUSP00000020420,10090.ENSMUSP00000020513,10090.ENSMUSP00000020687,10090.ENSMUSP00000020801,10090.ENSMUSP00000020877…	Supt5,Brd8,Lbr,Senp3,Trim28,Cdc20,Rbm14,Gmnn,Hivep2,Cdk1,Sycp3,Ap3d1,Papolg,Pttg1,Smg8,Twistnb,Rnaseh1,Recql5,Sgpp1,Nol8,Habp4,Smn1,Zc3h13,Pbk,Acin1,Sympk,Phf10,Pkmyt1,Eif2ak2,Ercc3,Wdr33,Incenp,Pola2,Bad,Pcgf6,Huwe1,Lactb2,Sf3b1,Rev1,Prim2,Trip12,Ube2t,Dtl,Cstf3,Zc3h8,Mrgbp,Sycp1,Larp7,Psip1,Nasp,Sfpq,Prkag2,Ppm1g,Rfc1,Zfp326,Zfml,Aplf,Tada3,Pagr1a,Nek1,Atr,Nktr,Topbp1,Tdrd6,Six6os1,Cdk13,Rad9b,…
GO:0010556	Regulation of macromolecule biosynthetic process	124	3294	0.28	1.27e-10	9.8962	10090.ENSMUSP00000002444,10090.ENSMUSP00000003527,10090.ENSMUSP00000003876,10090.ENSMUSP00000005705,10090.ENSMUSP00000006625,10090.ENSMUSP00000006898,10090.ENSMUSP00000008733,10090.ENSMUSP00000011493,10090.ENSMUSP00000015645,10090.ENSMUSP00000020099,10090.ENSMUSP00000020420,10090.ENSMUSP00000020687,10090.ENSMUSP00000021097,10090.ENSMUSP00000021929,10090.ENSMUSP00000023064,10090.ENSMUSP00000024657…	Rfx2,Supt5,Brd8,Trim28,Rbm14,Gmnn,Dnajb6,Dmrtc2,Hivep2,Cdk1,Ap3d1,Pttg1,Recql5,Habp4,Cby1,Phf10,Eif2ak2,Ercc3,Mtl5,Pcgf6,Ncl,Zc3h8,Mrgbp,Rbl1,Larp7,Psip1,Sfpq,Mapre3,Rfc1,Zfp326,Tada3,Pagr1a,Atr,Six6os1,Cdk13,Ccar2,Sox30,Kat6a,Ticrr,Bclaf1,Smarca5,Gltscr1l,Mael,Rbbp8,Topors,Leo1,Phf2,Piwil2,Ppp1r13l,Acd,Fnip1,Sltm,Rbbp6,Akap8l,Setx,Rbm15,Poldip3,Pcbp1,Zfp768,E2f8,Mlf1,Zfp507,Whsc1,Nipbl,Ilf3,Cenp…
GO:0071103	DNA conformation change	28	246	0.76	2.19e-10	9.65956	10090.ENSMUSP00000020099,10090.ENSMUSP00000020252,10090.ENSMUSP00000021097,10090.ENSMUSP00000022793,10090.ENSMUSP00000023144,10090.ENSMUSP00000025241,10090.ENSMUSP00000025562,10090.ENSMUSP00000029448,10090.ENSMUSP00000030456,10090.ENSMUSP00000036360,10090.ENSMUSP00000038181,10090.ENSMUSP00000039422,10090.ENSMUSP00000044361,10090.ENSMUSP00000051389,10090.ENSMUSP00000053078,10090.ENSMUSP00000059192…	Cdk1,Sycp3,Recql5,Acin1,Prm1,Ercc3,Incenp,Sycp1,Nasp,Tspyl4,Kat6a,Shprh,Smarca5,Akap8l,Tnp2,Mcm3,Nipbl,Rad18,Nap1l4,Npm1,Gtf2f2,Anp32b,Hmga1-rs1,Sirt1,Hat1,Hfm1,Baz2a,Fam172a
GO:0033554	Cellular response to stress	73	1493	0.4	4.23e-10	9.37366	10090.ENSMUSP00000005705,10090.ENSMUSP00000020099,10090.ENSMUSP00000020252,10090.ENSMUSP00000020687,10090.ENSMUSP00000021097,10090.ENSMUSP00000024884,10090.ENSMUSP00000025241,10090.ENSMUSP00000025910,10090.ENSMUSP00000026292,10090.ENSMUSP00000027251,10090.ENSMUSP00000027421,10090.ENSMUSP00000027687,10090.ENSMUSP00000027933,10090.ENSMUSP00000029448,10090.ENSMUSP00000030623,10090.ENSMUSP00000030784…	Trim28,Cdk1,Sycp3,Pttg1,Recql5,Eif2ak2,Ercc3,Bad,Huwe1,Rev1,Trip12,Ube2t,Dtl,Sycp1,Sfpq,Prkag2,Rfc1,Aplf,Pagr1a,Nek1,Atr,Topbp1,Six6os1,Rad9b,Ccar2,Kat6a,Slx4,Shprh,Ticrr,Bclaf1,Atrip,Mael,Rbbp8,Topors,Acd,Fnip1,Rbbp6,Setx,Fam175a,Mcm3,Nipbl,Mdm4,Rad18,Npm1,Hspa2,Eya3,Mdc1,Ccdc88c,Lig3,Morc2a,Hsf5,Hsp90aa1,Armt1,Flcn,Rtn4,Hmga1-rs1,Sirt1,Usp47,Stk33,Ect2,Clgn,Rif1,Cep164,Fzr1,Ccdc13,Uimc1,Myef2,M…
GO:2000112	Regulation of cellular macromolecule biosynthetic process	120	3203	0.28	4.69e-10	9.32883	10090.ENSMUSP00000002444,10090.ENSMUSP00000003527,10090.ENSMUSP00000003876,10090.ENSMUSP00000005705,10090.ENSMUSP00000006625,10090.ENSMUSP00000006898,10090.ENSMUSP00000008733,10090.ENSMUSP00000011493,10090.ENSMUSP00000015645,10090.ENSMUSP00000020099,10090.ENSMUSP00000020420,10090.ENSMUSP00000020687,10090.ENSMUSP00000021097,10090.ENSMUSP00000021929,10090.ENSMUSP00000023064,10090.ENSMUSP00000024657…	Rfx2,Supt5,Brd8,Trim28,Rbm14,Gmnn,Dnajb6,Dmrtc2,Hivep2,Cdk1,Ap3d1,Pttg1,Recql5,Habp4,Cby1,Phf10,Eif2ak2,Ercc3,Mtl5,Pcgf6,Ncl,Zc3h8,Mrgbp,Rbl1,Larp7,Psip1,Sfpq,Mapre3,Rfc1,Zfp326,Tada3,Pagr1a,Atr,Six6os1,Cdk13,Ccar2,Sox30,Kat6a,Ticrr,Bclaf1,Smarca5,Gltscr1l,Mael,Topors,Leo1,Phf2,Piwil2,Ppp1r13l,Acd,Fnip1,Sltm,Rbbp6,Akap8l,Setx,Rbm15,Poldip3,Pcbp1,Zfp768,E2f8,Mlf1,Zfp507,Whsc1,Nipbl,Ilf3,Zfp608,Mdm…
[truncated: 207 more rows]

## Sheet: Q2_2.5-3D STQ ontology
#term ID	term description	observed gene count	background gene count	strength	false discovery rate	"-LOG10(FDR)"	matching proteins in your network (IDs)	matching proteins in your network (labels)
GO:0006281	DNA repair	11	435	1.37	7e-09	8.1549	10090.ENSMUSP00000020252,10090.ENSMUSP00000025241,10090.ENSMUSP00000032918,10090.ENSMUSP00000034980,10090.ENSMUSP00000035164,10090.ENSMUSP00000051492,10090.ENSMUSP00000055895,10090.ENSMUSP00000059192,10090.ENSMUSP00000080425,10090.ENSMUSP00000080949,10090.ENSMUSP00000122196	Sycp3,Ercc3,Pagr1a,Atr,Topbp1,Setx,Fam175a,Mcm3,Eya3,Mdc1,Uimc1
[truncated: 35 more rows]

## Sheet: Q2_shared 4 hr and 2.5-3 day
#term ID	term description	observed gene count	background gene count	strength	false discovery rate	"-LOG10(FDR)"	matching proteins in your network (IDs)	matching proteins in your network (labels)
[truncated: 103 more rows]
