# Supplementary material for: Phosphoproteomics of ATR signaling in mouse testes
Source: eLife. 2022 Feb 8;11:e68648. doi: 10.7554/eLife.68648 (PMC8824463; doi:10.7554/eLife.68648)
Supplement: Supplementary file 3. — Complete list of phosphopeptides identified in each biological replicate for mice treated with ATRi 2.5 and 3 days hours and the Rad1 cKO conditions. Rad1 cKO phosphopeptides are the same presented in Supplementary file 1. Column header definitions can be found in sheet 1. See Materials and methods for details on data processing and filtering. Phosphosites removed by filtering can be found in the last tab. [file elife-68648-supp3.xlsx]

## Sheet: Description of columns
Column	Name	Description
A	ProtName_site	Name of protein and phosphorylated amino acid site
B	All_Parent_Proteins	List of all proteins from which the peptide could have been derived
C	UniProtID	UniProtID of identified protein
D	position	Position of phosphorylated residue within protein
E	BestProb	Phosphosite probability score
F	Sequence_window	Amino acid sequence surrounding phosphorylation site
G	P	Phosphorylated amino acid residue
H	P.1	Amino acid at the +1 site
I	P.2	Amino acid at the +2 site
J	P.3	Amino acid at the +3 site
K	Total_ExpObservations	Total number of experiments where this peptide was detected
L	AZ20_ExpObservations	Total number of ATRi (AZ20) experiments where the peptide was detected
M	RAD1_ExpObservations	Total number of RAD1 cKO experiments where the peptide was detected
N	AZ20_1_ratio	Ratio of 3 day ATRi (AZ20)/vehicle from replicate 1
O	AZ20_2_ratio	Ratio of 2.5 hour ATRi (AZ20)/vehicle from replicate 2
P	RAD1_1_ratio	Ratio of Rad1 cKO/control from replicate 1
Q	RAD1_2_ratio	Ratio of Rad1 cKO/control from replicate 2
R	RAD1_3_ratio	Ratio of Rad1 cKO/control from replicate 3
S	STY.Q.X	Phosphorylation at the S/T/Y-Q motif
T	AZ20_Ratio_Avg	Average ATRi (AZ20)/vehicle ratio from all replicates
U	AZ20_pval	AZ20 p-value
V	RAD1_Ratio_Avg	Average Rad1 cKO/control ratio from all replicates
W	RAD1_pval	Rad1 cKO p-value
X	quadr	Quadrant location of phosphopeptides determined by 'Bowtie filtering', quadrants 1-4 (Q1, Q2, Q3, Q4), NR (between quadrants) or center (CENTER)
RemovedQuadrSites	This table contains phosphosites from quadrants that were removed with filtering (described in methods)

## Sheet: AZ20_3DAY_QuadrFiltered
ProtName_site	All_Parent_Proteins	UniProtID	position	BestProb	Sequence_window	P	P.1	P.2	P.3	Total_ExpObservations	AZ20_ExpObservations	RAD1_ExpObservations	AZ20_2-3day_1_ratio	AZ20_2-3day_2_ratio	RAD1_1_ratio	RAD1_2_ratio	RAD1_3_ratio	STY.Q.X	AZ20_Ratio_Avg	AZ20_pval_all	RAD1_Ratio_Avg	RAD1_pval_all	quadr
1433S_45	sp|O70456|1433S_MOUSE,sp|P61982|1433G_MOUSE,sp|P62259|1433E_MOUSE,sp|P63101|1433Z_MOUSE,sp|P68254|1433T_MOUSE,sp|P68510|1433F_MOUSE,sp|Q9CQV8|1433B_MOUSE	O70456	45	0.998	VEKGEELSCEERNLLSVAYKNVVGGQRAAWR	S	V	A	Y	5	2	3	-0.286286	0.299101	0.121112	-0.327143	-0.041989	STYX	0.0064077	0.975982	-0.0826732	0.643503	CENTER
1433T_232	sp|P68254|1433T_MOUSE	P68254	232	0.997	IMQLLRDNLTLWTSDSAGEECDAAEGAEN__	S	A	G	E	4	2	2	-0.527508	-0.317	NA	-0.452045	1.08662	STYX	-0.422254	0.0644855	0.31729	0.739632	CENTER
1433Z_184	sp|P63101|1433Z_MOUSE,sp|Q9CQV8|1433B_MOUSE	P63101	184	0.999	GLALNFSVFYYEILNSPEKACSLAKTAFDEA	S	P	E	K	4	2	2	-0.0734934	-0.240718	-0.283855	-0.0539974	NA	STYX	-0.157106	0.39181	-0.168926	0.523278	CENTER
2A5A_41 42	sp|Q6PD03|2A5A_MOUSE	Q6PD03	41 42	0.893	RKSVRKAQRQKRSQGSSQFRSQGSQAELHPL KSVRKAQRQKRSQGSSQFRSQGSQAELHPLP	S	S	Q	F	5	2	3	-0.268209	-0.095532	-1.19976	-1.12915	-0.937358	STYX	-0.18187	0.327515	-1.08875	0.00690741	NR
2A5E_32 33 34	sp|Q61151|2A5E_MOUSE	Q61151	32 33 34	0.899	FSRKSVRKARQKRSQSSSQFRSQGKPIELTP SRKSVRKARQKRSQSSSQFRSQGKPIELTPL RKSVRKARQKRSQSSSQFRSQGKPIELTPLP	S	S	S	Q	5	2	3	-0.203381	0.0720732	-0.0652594	-0.336172	-0.272139	STYX	-0.0656538	0.742125	-0.224524	0.328479	CENTER
2A5G_476	sp|Q60996|2A5G_MOUSE	Q60996	476	0.997	DGPQFEDVQMLKKTVSDEARQAQKELKKDRP	S	D	E	A	4	2	2	0.580211	-0.693687	0.739046	NA	0.377865	STYX	-0.0567383	0.881674	0.558456	0.200851	CENTER
3BP1_577	sp|P55194|3BP1_MOUSE	P55194	577	0.98	ARPTMPPPQPSSTRSSPPAPSLPPGSVSPGT	S	P	P	A	5	2	3	0.0762599	-0.0524912	-0.108844	-0.550253	-0.237315	STYX	0.0118844	0.908736	-0.298804	0.23707	CENTER
3BP2_225	sp|Q06649|3BP2_MOUSE	Q06649	225	0.992	PVPRKPAFSDLPRAHSFTSKSPSPLLPPPPP	S	F	T	S	5	2	3	0.315667	-0.382095	0.0400756	-0.737398	-0.990643	STYX	-0.0332141	0.867218	-0.562655	0.0999998	CENTER
3BP2_414	sp|Q06649|3BP2_MOUSE	Q06649	414	0.998	VLPRPENTPLPHLQRSPPDGQSFRGFSFEKA	S	P	P	D	5	2	3	-0.183204	-0.0671897	-0.882009	-0.566034	-0.338511	STYX	-0.125197	0.489422	-0.595518	0.0518592	CENTER
3BP5_379	sp|Q9Z131|3BP5_MOUSE	Q9Z131	379	0.994	MFPILGPRSECSGASSPECEVERGDRAEGAE	S	P	E	C	4	2	2	-0.309051	-0.0713212	-0.225628	-1.01144	NA	STYX	-0.190186	0.326681	-0.618536	0.136941	CENTER
3BP5L_13	sp|Q99LH9|3BP5L_MOUSE	Q99LH9	13	1	___MADLKKAAGGRETPQGELRSEVVEDEGP	T	P	Q	G	5	2	3	0.0647525	0.332313	-0.407259	-0.442706	-0.716494	STYX	0.198533	0.331086	-0.522153	0.0665835	CENTER
3BP5L_342	sp|Q99LH9|3BP5L_MOUSE	Q99LH9	342	0.998	PDTDTLSLLSLRTVASDLQKCDSVEHLRGLS	S	D	L	Q	5	2	3	0.101434	0.886478	-0.0858678	-0.252118	0.0667408	STYX	0.493956	0.156004	-0.0904149	0.618519	CENTER
3BP5L_349	sp|Q99LH9|3BP5L_MOUSE	Q99LH9	349	1	LLSLRTVASDLQKCDSVEHLRGLSDHASLDG	S	V	E	H	5	2	3	0.296502	0.0177772	-0.346083	0.144971	0.0255532	STYX	0.15714	0.430092	-0.0585195	0.713854	CENTER
3BP5L_361	sp|Q99LH9|3BP5L_MOUSE	Q99LH9	361	0.999	KCDSVEHLRGLSDHASLDGQELGAQSRGRRG	S	L	D	G	4	2	2	-0.249357	0.454383	NA	-0.169965	-0.733186	STYX	0.102513	0.82431	-0.451575	0.208678	CENTER
4EBP1_33 34 35 36 43 44 45	sp|Q60876|4EBP1_MOUSE	Q60876	33 34 35 36 43 44 45	0.891	RRVALGDGVQLPPGDYSTTPGGTLFSTTPGG RVALGDGVQLPPGDYSTTPGGTLFSTTPGGT VALGDGVQLPPGDYSTTPGGTLFSTTPGGTR ALGDGVQLPPGDYSTTPGGTLFSTTPGGTRI LPPGDYSTTPGGTLFSTTPGGTRIIYDRKFL PPGDYSTTPGGTLFSTTPGGTRIIYDRKFLM PGDYSTTPGGTLFSTTPGGTRIIYDRKFLME	Y	S	T	T	5	2	3	-0.059986	-0.181107	0.00145742	-0.539403	-0.200822	STYX	-0.120546	0.508715	-0.246256	0.320398	CENTER
4EBP1_43 44 45	sp|Q60876|4EBP1_MOUSE	Q60876	43 44 45	0.899	LPPGDYSTTPGGTLFSTTPGGTRIIYDRKFL PPGDYSTTPGGTLFSTTPGGTRIIYDRKFLM PGDYSTTPGGTLFSTTPGGTRIIYDRKFLME	S	T	T	P	5	2	3	-0.131073	0.394558	0.0528411	-0.258284	-0.103535	STYX	0.131742	0.64322	-0.102993	0.584923	CENTER
4EBP1_45	sp|Q60876|4EBP1_MOUSE	Q60876	45	0.992	PGDYSTTPGGTLFSTTPGGTRIIYDRKFLME	T	P	G	G	5	2	3	-0.112035	-0.159175	-0.224435	-0.0960325	0.0856409	STYX	-0.135605	0.441025	-0.0782756	0.648304	CENTER
4EBP1_69	sp|Q60876|4EBP1_MOUSE	Q60876	69	0.998	DRKFLMECRNSPVAKTPPKDLPAIPGVTSPT	T	P	P	K	5	2	3	-0.257027	-0.178918	-0.358846	-0.685582	0.00247701	STYX	-0.217973	0.232482	-0.347317	0.206663	CENTER
4EBP2_46	sp|P70445|4EBP2_MOUSE	P70445	46	0.992	PQDYCTTPGGTLFSTTPGGTRIIYDRKFLLD	T	P	G	G	5	2	3	-0.228219	-0.25735	0.0732169	-0.0723778	-0.305942	STYX	-0.242785	0.188516	-0.101701	0.593378	CENTER
4EBP2_65	sp|P70445|4EBP2_MOUSE	P70445	65	0.999	TRIIYDRKFLLDRRNSPMAQTPPCHLPNIPG	S	P	M	A	5	2	3	-0.382444	0.110242	-0.515238	-0.974623	-0.455837	STYX	-0.136101	0.570121	-0.648566	0.0397925	CENTER
4ET_344	sp|Q9EST3|4ET_MOUSE	Q9EST3	344	0.997	GSVSASRFSRWFSNPSRSGSRSSSLGSTPHE	S	R	S	G	5	2	3	-0.020096	0.6648	-0.263888	-0.0416206	0.420391	STYX	0.322352	0.318151	0.0382939	0.945243	CENTER
4ET_563	sp|Q9EST3|4ET_MOUSE	Q9EST3	563	0.999	GSLEATASLLSQRAPSPPMSQVFRTQAASAD	S	P	P	M	5	2	3	-0.3052	0.189052	-0.248765	-0.326169	0.0336236	STYX	-0.0580741	0.792831	-0.180437	0.413441	CENTER
4ET_586	sp|Q9EST3|4ET_MOUSE	Q9EST3	586	0.999	RTQAASADYLHPRIPSPIGFPSGPQQLLGDP	S	P	I	G	5	2	3	-0.186178	-0.400815	0.0885442	-0.197188	0.368632	STYX	-0.293496	0.147172	0.0866625	0.90348	CENTER
4ET_76 77	sp|Q9EST3|4ET_MOUSE	Q9EST3	76 77	0.885	DPEKWHASLYPASGRSSPVESLKKESESDRP PEKWHASLYPASGRSSPVESLKKESESDRPS	S	S	P	V	5	2	3	0.495407	0.706863	-0.0980286	0.141696	0.200676	STYX	0.601135	0.0477747	0.0814479	0.898237	CENTER
4ET_77	sp|Q9EST3|4ET_MOUSE	Q9EST3	77	0.991	PEKWHASLYPASGRSSPVESLKKESESDRPS	S	P	V	E	5	2	3	0.0705359	0.942361	-0.131312	0.162675	0.297962	STYX	0.506448	0.177382	0.109775	0.823616	CENTER
4ET_949	sp|Q9EST3|4ET_MOUSE	Q9EST3	949	0.986	HMHSQLEHRTSQRSSSPVGLAKWFGSDVLQQ	S	P	V	G	5	2	3	0.179837	0.944867	-0.0964351	0.0525116	-0.0163656	STYX	0.562352	0.105282	-0.0200964	0.809408	CENTER
4F2_58	sp|P10852|4F2_MOUSE	P10852	58	0.998	VAEDETEAGVKFTGLSKEELLKVAGSPGWVR	S	K	E	E	5	2	3	-0.351037	0.40339	-0.993633	-1.18717	-0.457395	STYX	0.0261763	0.992232	-0.879399	0.0175172	NR
5NT1B_109 110	sp|Q91YE9|5NT1B_MOUSE	Q91YE9	109 110	0.89	STTSRTSSASPSQHETSPPPQTSEKSSIQQT TTSRTSSASPSQHETSPPPQTSEKSSIQQTP	T	S	P	P	4	2	2	-1.43725	0.690846	0.464463	0.97052	NA	STYX	-0.373201	0.864562	0.717491	0.12552	CENTER
5NT1B_183	sp|Q91YE9|5NT1B_MOUSE	Q91YE9	183	0.993	EPRDLQLRDYAYSCDSREGMPKTREYPRTPP	S	R	E	G	4	2	2	-0.333562	0.208285	NA	0.682496	-0.0374883	STYX	-0.0626386	0.785726	0.322504	0.519418	CENTER
5NT1B_19	sp|Q91YE9|5NT1B_MOUSE	Q91YE9	19	0.992	TSLKHKKKNEPGMRYSKESLDAEKRKDSDKT	S	K	E	S	4	2	2	0.0384187	-0.28645	NA	1.07257	1.14593	STYX	-0.124016	0.544347	1.10925	0.0381478	NR
5NT1B_196	sp|Q91YE9|5NT1B_MOUSE	Q91YE9	196	0.995	CDSREGMPKTREYPRTPPTEWKPYAQRRLQY	T	P	P	T	5	2	3	-0.334474	0.121585	1.11007	0.828576	1.24088	STYX	-0.106445	0.644754	1.05984	0.0140319	NR
5NT1B_214	sp|Q91YE9|5NT1B_MOUSE	Q91YE9	214	0.998	TEWKPYAQRRLQYGTSVDMEPEYISDGPQQR	S	V	D	M	5	2	3	-0.330415	-0.290639	0.0685301	-0.0296233	-0.21592	STYX	-0.310527	0.114822	-0.0590043	0.698457	CENTER
5NT1B_22	sp|Q91YE9|5NT1B_MOUSE	Q91YE9	22	0.998	KHKKKNEPGMRYSKESLDAEKRKDSDKTGAR	S	L	D	A	4	2	2	-0.242971	0.0717761	1.23493	NA	0.976431	STYX	-0.0855975	0.670065	1.10568	0.0394357	NR
5NT1B_43	sp|Q91YE9|5NT1B_MOUSE	Q91YE9	43	0.999	RKDSDKTGARLSTQGSQELPLHNTDSRGYVV	S	Q	E	L	4	2	2	-0.00571128	-0.117851	NA	-0.107734	-0.376774	STYQ	-0.0617812	0.743401	-0.242254	0.402427	CENTER
5NT1B_53	sp|Q91YE9|5NT1B_MOUSE	Q91YE9	53	0.996	LSTQGSQELPLHNTDSRGYVVRNQWSRTSRS	S	R	G	Y	4	2	2	-0.374748	-0.16664	NA	0.391528	0.108479	STYX	-0.270694	0.171985	0.250003	0.567071	CENTER
5NT1B_65 66	sp|Q91YE9|5NT1B_MOUSE	Q91YE9	65 66	0.896	NTDSRGYVVRNQWSRTSRSPSTGAPSVDEPR TDSRGYVVRNQWSRTSRSPSTGAPSVDEPRS	T	S	R	S	5	2	3	0.00933515	-0.256913	1.32479	0.288783	0.36351	STYX	-0.123789	0.521869	0.659028	0.119472	CENTER
5NT1B_68	sp|Q91YE9|5NT1B_MOUSE	Q91YE9	68	0.996	SRGYVVRNQWSRTSRSPSTGAPSVDEPRSRN	S	P	S	T	5	2	3	0.202962	-0.0718088	0.822646	0.468839	0.495322	STYX	0.0655766	0.726019	0.595603	0.0958506	CENTER
5NTC_511	sp|Q3V1L4|5NTC_MOUSE	Q3V1L4	511	0.991	DINEMESPLATRNRTSVDFKDTDYKRHQLTR	S	V	D	F	5	2	3	0.192241	0.0742644	-0.515611	-0.5392	-0.651401	STYX	0.133253	0.444235	-0.568737	0.049215	CENTER
6PGL_49	sp|Q9CQ60|6PGL_MOUSE	Q9CQ60	49	0.998	LEGDRGRFALGLSGGSLVSMLARDLPAAAAP	S	L	V	S	5	2	3	-0.424378	0.306684	-0.117117	-0.830671	-0.456363	STYX	-0.0588468	0.817307	-0.46805	0.114345	CENTER
A0A087WP11_99	tr|A0A087WP11|A0A087WP11_MOUSE,tr|J3QP08|J3QP08_MOUSE,sp|Q5M8Q2|H2AL1_MOUSE,tr|Q810S6|Q810S6_MOUSE,tr|Q9DAD9|Q9DAD9_MOUSE	A0A087WP11	99	0.995	QNNEQLRQLFKPGGTSVNEDDN_________	S	V	N	E	5	2	3	-0.164469	-0.219103	1.238	0.90992	1.12733	STYX	-0.191786	0.285043	1.09175	0.0122804	NR
A0A087WP63_1683	tr|A0A087WP63|A0A087WP63_MOUSE,tr|A0A087WQ44|A0A087WQ44_MOUSE	A0A087WP63	1683	0.998	PKDEPETLTLRSGPPSPLPTATSFSGPRPRR	S	P	L	P	5	2	3	0.251209	-0.0400806	-0.0333164	0.147451	-0.000438475	STYX	0.105564	0.587285	0.0378988	0.97539	CENTER
A0A087WPY7_137	tr|A0A087WPY7|A0A087WPY7_MOUSE,tr|A0A087WR82|A0A087WR82_MOUSE,tr|B2RWR6|B2RWR6_MOUSE,tr|J3QK27|J3QK27_MOUSE,sp|O35698|RBY1A_MOUSE,sp|Q60990|RBY1B_MOUSE	A0A087WPY7	137	0.997	RSGPSCEGNLGGDRYTPNFNVSSSGRHFAVK	T	P	N	F	5	2	3	-0.126815	-0.552871	-0.24271	-0.252619	-0.190124	STYX	-0.339843	0.153718	-0.228484	0.314274	CENTER
A0A087WPY7_88 89 92	tr|A0A087WPY7|A0A087WPY7_MOUSE,tr|A0A087WR82|A0A087WR82_MOUSE,tr|B2RWR6|B2RWR6_MOUSE,tr|J3QK27|J3QK27_MOUSE,sp|O35698|RBY1A_MOUSE,sp|Q60990|RBY1B_MOUSE	A0A087WPY7	88 89 92	0.899	ILDGKRIKVKQARRPSSLESGSKKRPPSFSR LDGKRIKVKQARRPSSLESGSKKRPPSFSRT KRIKVKQARRPSSLESGSKKRPPSFSRTRGA	S	S	L	E	4	2	2	0.55686	-1.20544	NA	-0.4168	-0.553122	STYX	-0.324289	0.815472	-0.484961	0.148627	CENTER
A0A087WPY7_89	tr|A0A087WPY7|A0A087WPY7_MOUSE,tr|A0A087WR82|A0A087WR82_MOUSE,tr|B2RWR6|B2RWR6_MOUSE,tr|J3QK27|J3QK27_MOUSE,sp|O35698|RBY1A_MOUSE,sp|Q60990|RBY1B_MOUSE	A0A087WPY7	89	0.992	LDGKRIKVKQARRPSSLESGSKKRPPSFSRT	S	L	E	S	5	2	3	0.591704	-1.74211	0.132723	0.0109282	-0.743512	STYX	-0.5752	0.823871	-0.199954	0.481741	CENTER
A0A087WQP8_54	tr|A0A087WQP8|A0A087WQP8_MOUSE,tr|A0A0G2JE01|A0A0G2JE01_MOUSE,tr|D3YYI9|D3YYI9_MOUSE,tr|E9Q4E0|E9Q4E0_MOUSE,tr|K7N5V5|K7N5V5_MOUSE,tr|K7N660|K7N660_MOUSE	A0A087WQP8	54	0.985	RRWTWRMCMAHGQTTSPVPVKSKKQFEKEEK	S	P	V	P	5	2	3	0.0134634	-0.0891253	0.872062	1.08096	1.06875	STYX	-0.037831	0.85263	1.00725	0.0157831	NR
A0A087WR45_376	tr|A0A087WR45|A0A087WR45_MOUSE	A0A087WR45	376	0.979	QFPRETPDRTVPRARSPPFHSRGSRVVPSRV	S	P	P	F	5	2	3	0.382227	-0.377478	0.359845	0.291353	0.276251	STYX	0.00237455	0.942979	0.30915	0.355209	CENTER
A0A087WR45_615	tr|A0A087WR45|A0A087WR45_MOUSE	A0A087WR45	615	1	EAVGSGEAASERPRVTIPRPRDVRKMVKTTY	T	I	P	R	4	2	2	-0.0195682	0.214573	NA	0.616184	1.02489	STYX	0.0975026	0.591633	0.820535	0.0869461	CENTER
A0A087WRI3_176 177	tr|A0A087WRI3|A0A087WRI3_MOUSE	A0A087WRI3	176 177	0.887	PPIPPNMTFGIRSRPSTPFFDLLQHRYQQLW PIPPNMTFGIRSRPSTPFFDLLQHRYQQLWV	S	T	P	F	5	2	3	-0.31343	-0.198462	0.398934	0.517828	0.649132	STYX	-0.255946	0.177925	0.521965	0.132122	CENTER
A0A087WRP6_86	tr|A0A087WRP6|A0A087WRP6_MOUSE	A0A087WRP6	86	1	KSEVNNPAIGKDGNISPQVKGDEDMGHEVGS	S	P	Q	V	4	2	2	0.00133661	0.112673	NA	-0.112352	0.931264	STYX	0.0570049	0.711543	0.409456	0.476601	CENTER
A0A087WRU1_40	tr|A0A087WRU1|A0A087WRU1_MOUSE	A0A087WRU1	40	1	ERNKLKSKLKLLGVVSPVKKPSVSLDLLNLY	S	P	V	K	5	2	3	-0.493846	0.460481	0.428183	1.50279	1.43933	STYX	-0.0166826	0.903297	1.12343	0.0220686	NR
A0A087WSD2_276	tr|A0A087WSD2|A0A087WSD2_MOUSE	A0A087WSD2	276	0.999	DKGTSFMYVPEEQEATPPLSPEQEIKLNALP	T	P	P	L	5	2	3	-0.16476	-0.04779	0.621817	0.827173	1.04409	STYX	-0.106275	0.55788	0.831027	0.0331618	NR
A0A087WSD2_473 474	tr|A0A087WSD2|A0A087WSD2_MOUSE	A0A087WSD2	473 474	0.895	TPYQDLPYQVLLIKDTSPQGTPYQYILTKEI PYQDLPYQVLLIKDTSPQGTPYQYILTKEIP	T	S	P	Q	4	2	2	-0.332164	0.0320643	NA	0.997878	-0.923555	STYX	-0.15005	0.479786	0.0371616	0.955396	CENTER
A0A087WSD2_474	tr|A0A087WSD2|A0A087WSD2_MOUSE	A0A087WSD2	474	0.994	PYQDLPYQVLLIKDTSPQGTPYQYILTKEIP	S	P	Q	G	5	2	3	-0.58474	0.175481	1.31286	0.693116	1.13704	STYX	-0.204629	0.552297	1.04767	0.0165162	NR
A0A087WSD2_498	tr|A0A087WSD2|A0A087WSD2_MOUSE	A0A087WSD2	498	0.991	ILTKEIPFQETPSQGTLSQESPSQWTLSKGT	T	L	S	Q	5	2	3	-0.340914	-0.0129831	1.3455	0.786222	0.992054	STYX	-0.176948	0.39343	1.04126	0.0159772	NR
A0A087WSD2_519	tr|A0A087WSD2|A0A087WSD2_MOUSE	A0A087WSD2	519	0.996	PSQWTLSKGTPSQGTSPKGTPSQVTPPQGTP	S	P	K	G	5	2	3	1.36766	-0.753298	1.65608	2.14018	1.22523	STYX	0.307183	0.989449	1.67383	0.00479916	NR
A0A087WSD2_745	tr|A0A087WSD2|A0A087WSD2_MOUSE	A0A087WSD2	745	0.995	TQNRPSQDSQYKETPSQEIFFQDTPFQNTPS	S	Q	E	I	4	2	2	-0.826887	-0.277581	0.732751	0.499527	NA	STYQ	-0.552234	0.0566523	0.616139	0.158129	CENTER
A0A087WSD2_837	tr|A0A087WSD2|A0A087WSD2_MOUSE	A0A087WSD2	837	0.997	QEWKSNQGKKPTRRLSLSLPGKHGQVHPKRY	S	L	S	L	5	2	3	-0.503837	0.173326	0.88807	0.662368	1.37126	STYX	-0.165255	0.585968	0.9739	0.0223289	NR
A0A087WSD2_839	tr|A0A087WSD2|A0A087WSD2_MOUSE,sp|P35441|TSP1_MOUSE	A0A087WSD2	839	0.998	WKSNQGKKPTRRLSLSLPGKHGQVHPKRYSV	S	L	P	G	5	2	3	-0.426912	0.11078	1.15436	0.99116	1.85564	STYX	-0.158066	0.535936	1.33372	0.00842544	NR
A0A087WSD2_867	tr|A0A087WSD2|A0A087WSD2_MOUSE	A0A087WSD2	867	0.989	YSVDLQVKSEKPRRYSEDLQSKTSRRKSIDQ	S	E	D	L	4	2	2	-0.0503142	-0.455579	NA	0.168366	0.900677	STYX	-0.252947	0.266599	0.534521	0.265648	CENTER
A0A087WSD2_879	tr|A0A087WSD2|A0A087WSD2_MOUSE	A0A087WSD2	879	1	RRYSEDLQSKTSRRKSIDQQIKAWISPKKNT	S	I	D	Q	5	2	3	0.0921403	0.158562	1.05933	0.376248	1.06313	STYX	0.125351	0.457958	0.832904	0.0419519	NR
A0A0A6YVU8_211	tr|A0A0A6YVU8|A0A0A6YVU8_MOUSE,sp|Q9JKV1|ADRM1_MOUSE	A0A0A6YVU8	211	0.998	GSSGPPASSSSSSSRSQSAAVTPSSSTSSAR	S	Q	S	A	4	2	2	0.269556	-0.0898653	0.0272508	-0.0161424	NA	STYQ	0.0898452	0.675321	0.0055542	0.905489	CENTER
A0A0A6YVU8_213	tr|A0A0A6YVU8|A0A0A6YVU8_MOUSE,sp|Q9JKV1|ADRM1_MOUSE	A0A0A6YVU8	213	0.993	SGPPASSSSSSSRSQSAAVTPSSSTSSARAT	S	A	A	V	5	2	3	0.00337113	-0.0817385	0.0333269	0.281357	-0.0121596	STYX	-0.0391837	0.847513	0.100841	0.84501	CENTER
A0A0A6YVU8_217	tr|A0A0A6YVU8|A0A0A6YVU8_MOUSE,sp|Q9JKV1|ADRM1_MOUSE	A0A0A6YVU8	217	0.998	ASSSSSSSRSQSAAVTPSSSTSSARATPAPS	T	P	S	S	5	2	3	0.0999809	0.0440867	0.408647	0.77533	0.231483	STYX	0.0720338	0.642494	0.47182	0.186736	CENTER
A0A0A6YVU8_219 220 221 222 223 224	tr|A0A0A6YVU8|A0A0A6YVU8_MOUSE,sp|Q9JKV1|ADRM1_MOUSE	A0A0A6YVU8	219 220 221 222 223 224	0.896	SSSSSSRSQSAAVTPSSSTSSARATPAPSAP SSSSSRSQSAAVTPSSSTSSARATPAPSAPA SSSSRSQSAAVTPSSSTSSARATPAPSAPAA SSSRSQSAAVTPSSSTSSARATPAPSAPAAA SSRSQSAAVTPSSSTSSARATPAPSAPAAAS SRSQSAAVTPSSSTSSARATPAPSAPAAASA	S	S	S	T	5	2	3	0.123677	-0.127971	0.211386	0.219634	0.119328	STYX	-0.0021471	0.9934	0.183449	0.617456	CENTER
A0A0A6YW05_23	tr|A0A0A6YW05|A0A0A6YW05_MOUSE,sp|O08716|FABP9_MOUSE	A0A0A6YW05	23	0.976	LCTMIEPFLGTWKLISSENFENYVRELGVEC	S	S	E	N	4	2	2	-0.314134	0.0470199	0.55819	-0.466812	NA	STYX	-0.133557	0.527664	0.0456889	0.956356	CENTER
A0A0A6YW05_23 24	tr|A0A0A6YW05|A0A0A6YW05_MOUSE,sp|O08716|FABP9_MOUSE	A0A0A6YW05	23 24	0.889	LCTMIEPFLGTWKLISSENFENYVRELGVEC CTMIEPFLGTWKLISSENFENYVRELGVECE	S	S	E	N	5	2	3	-0.350412	-0.0471201	0.534785	0.782909	0.188353	STYX	-0.198766	0.331254	0.502016	0.167034	CENTER
A0A0A6YW67_57	tr|A0A0A6YW67|A0A0A6YW67_MOUSE,tr|D3YYZ2|D3YYZ2_MOUSE,sp|P0CG49|UBB_MOUSE,sp|P0CG49|UBB_MOUSE,sp|P0CG49|UBB_MOUSE,sp|P0CG49|UBB_MOUSE,sp|P0CG50|UBC_MOUSE,sp|P0CG50|UBC_MOUSE,sp|P0CG50|UBC_MOUSE,sp|P0CG50|UBC_MOUSE,sp|P0CG50|UBC_MOUSE,sp|P0CG50|UBC_MOUSE,sp|P0CG50|UBC_MOUSE,sp|P0CG50|UBC_MOUSE,sp|P0CG50|UBC_MOUSE,sp|P62983|RS27A_MOUSE,sp|P62984|RL40_MOUSE	A0A0A6YW67	57	0.991	RLIFAGKQLEDGRTLSDYNIQKESTLHLVLR	S	D	Y	N	5	2	3	-0.13455	-0.0322154	1.0183	0.577321	1.16863	STYX	-0.083383	0.65147	0.921415	0.0257664	NR
A0A0A6YW67_65	tr|A0A0A6YW67|A0A0A6YW67_MOUSE,sp|P0CG49|UBB_MOUSE,sp|P0CG49|UBB_MOUSE,sp|P0CG49|UBB_MOUSE,sp|P0CG49|UBB_MOUSE,sp|P0CG50|UBC_MOUSE,sp|P0CG50|UBC_MOUSE,sp|P0CG50|UBC_MOUSE,sp|P0CG50|UBC_MOUSE,sp|P0CG50|UBC_MOUSE,sp|P0CG50|UBC_MOUSE,sp|P0CG50|UBC_MOUSE,sp|P62983|RS27A_MOUSE,sp|P62984|RL40_MOUSE	A0A0A6YW67	65	0.993	LEDGRTLSDYNIQKESTLHLVLRLRGGY___	S	T	L	H	4	2	2	-1.08597	-2.44077	-0.0949054	NA	-0.0138068	STYX	-1.76337	0.0152819	-0.0543561	0.763582	NR
A0A0A6YY83_974	tr|A0A0A6YY83|A0A0A6YY83_MOUSE	A0A0A6YY83	974	0.989	PNGQRYDSVNEKLSDSPSMGRYRSVNGGPGS	S	P	S	M	5	2	3	-0.496067	-0.111382	0.16435	-0.0229902	-0.0322807	STYX	-0.303725	0.181466	0.0363597	0.970004	CENTER
A0A0G2JGR8_54	tr|A0A0G2JGR8|A0A0G2JGR8_MOUSE,tr|D3Z6R1|D3Z6R1_MOUSE	A0A0G2JGR8	54	0.996	RRWTWRMWMAHRQTTSPVPVTSKKQFEKEEK	S	P	V	P	5	2	3	-0.0328039	-0.0765684	0.545937	0.753653	1.25102	STYX	-0.0546861	0.779501	0.850203	0.036548	NR
A0A0J9YUD5_1218	tr|A0A0J9YUD5|A0A0J9YUD5_MOUSE	A0A0J9YUD5	1218	0.99	KPYSDGEGGMEDENRSVSGFLHFDTATKVRR	S	V	S	G	5	2	3	-0.325206	-0.195626	-0.350436	-1.20665	0.242014	STYX	-0.260416	0.174079	-0.438357	0.243926	CENTER
A0A0R4J054_68	tr|A0A0R4J054|A0A0R4J054_MOUSE	A0A0R4J054	68	1	CEAVFGPSIMKNWHGSPRGHDALKRKPLMTG	S	P	R	G	5	2	3	-0.276955	0.177446	1.13127	0.344427	0.699275	STYX	-0.0497548	0.814423	0.72499	0.0660311	CENTER
A0A0R4J054_902	tr|A0A0R4J054|A0A0R4J054_MOUSE	A0A0R4J054	902	0.987	TKLAQEVNNMKLTLTSPGKSSQ_________	S	P	G	K	4	2	2	-0.0251398	0.113099	NA	0.728446	1.02468	STYX	0.0439797	0.767267	0.87656	0.0707164	NR
A0A0U1RNF2_247	tr|A0A0U1RNF2|A0A0U1RNF2_MOUSE	A0A0U1RNF2	247	0.998	DDRFGQIMIENLRRRSCDLAGVETCKSLESQ	S	C	D	L	5	2	3	0.38229	0.129908	-0.750614	-0.676048	-0.931804	STYX	0.256099	0.224223	-0.786156	0.01864	CENTER
A0A0U1RNP2_567	tr|A0A0U1RNP2|A0A0U1RNP2_MOUSE,sp|E9PYH6|SET1A_MOUSE	A0A0U1RNP2	567	0.999	LPAPDEKPETDGLVDSPVMPLSEKETLPTQP	S	P	V	M	5	2	3	-0.101254	-0.217593	-0.630482	-0.345472	0.265308	STYX	-0.159423	0.37869	-0.236882	0.367836	CENTER
A0A0U1RNP2_616 617	tr|A0A0U1RNP2|A0A0U1RNP2_MOUSE,sp|E9PYH6|SET1A_MOUSE	A0A0U1RNP2	616 617	0.896	PAGPPDAAPRLDERPSSPIPLLPPPKKRRKT AGPPDAAPRLDERPSSPIPLLPPPKKRRKTV	S	S	P	I	5	2	3	0.00691252	0.230112	-0.182122	-0.418073	-0.411625	STYX	0.118512	0.520699	-0.337273	0.17915	CENTER
A0A0U1RNP2_617	tr|A0A0U1RNP2|A0A0U1RNP2_MOUSE,sp|E9PYH6|SET1A_MOUSE	A0A0U1RNP2	617	0.991	AGPPDAAPRLDERPSSPIPLLPPPKKRRKTV	S	P	I	P	5	2	3	-0.241384	0.206331	-0.29958	-0.495718	-0.608596	STYX	-0.0175265	0.918735	-0.467964	0.0885534	CENTER
A0A140LI88_63	tr|A0A140LI88|A0A140LI88_MOUSE	A0A140LI88	63	1	FCFHSGVDGMQKGIHSPEIQLGLKLRKDSQE	S	P	E	I	5	2	3	-0.795085	0.25509	0.359593	0.366684	0.047218	STYX	-0.269997	0.599042	0.257832	0.467521	CENTER
A0A140LIQ5_96 97	tr|A0A140LIQ5|A0A140LIQ5_MOUSE	A0A140LIQ5	96 97	0.893	EDCEENLPENLKRFNSSPLALPRLTKRRRSS DCEENLPENLKRFNSSPLALPRLTKRRRSSS	S	S	P	L	5	2	3	-0.383041	-0.0116373	0.11541	-0.0215835	0.158097	STYX	-0.197339	0.359613	0.0839743	0.889163	CENTER
A0A140LIQ5_97	tr|A0A140LIQ5|A0A140LIQ5_MOUSE	A0A140LIQ5	97	0.995	DCEENLPENLKRFNSSPLALPRLTKRRRSSS	S	P	L	A	5	2	3	-0.0143059	0.150124	0.321188	-0.05838	0.228535	STYX	0.0679093	0.677297	0.163781	0.678904	CENTER
A0A140LIU8_203	tr|A0A140LIU8|A0A140LIU8_MOUSE	A0A140LIU8	203	0.999	SFLQEAGAAAAQARLSDEEGAEGEGGTGEAG	S	D	E	E	5	2	3	0.601923	-0.161086	0.056335	0.0639638	0.334596	STYX	0.220418	0.587673	0.151632	0.710482	CENTER
A0A140LIY9_2283	tr|A0A140LIY9|A0A140LIY9_MOUSE	A0A140LIY9	2283	0.941	DSKAVPSGQKKDRPVSSEGRLLQSNVSHSSI	S	S	E	G	4	2	2	0.316049	-0.548356	1.84124	1.47567	NA	STYX	-0.116154	0.746297	1.65845	0.0197512	NR
A0A140LIY9_507	tr|A0A140LIY9|A0A140LIY9_MOUSE	A0A140LIY9	507	0.991	DQRGLVTPGTDQRAFSPSLSDERTLVSLGLM	S	P	S	L	5	2	3	-0.211427	-0.0883193	0.863827	0.475929	0.740771	STYX	-0.149873	0.407174	0.693509	0.0602541	CENTER
A0A140LIY9_535	tr|A0A140LIY9|A0A140LIY9_MOUSE	A0A140LIY9	535	0.974	GLMQVSTDQQGFRQSSLTSRFIQPGAEQLRV	S	L	T	S	4	2	2	0.19662	-0.290981	1.16339	NA	0.874233	STYX	-0.0471808	0.82431	1.01881	0.048381	NR
A0A140LIY9_575	tr|A0A140LIY9|A0A140LIY9_MOUSE	A0A140LIY9	575	1	LDRRSSVPVGTERRASLQALAEKRSSVPIEV	S	L	Q	A	5	2	3	-0.259398	0.15924	0.602545	0.352995	0.474974	STYX	-0.050079	0.810145	0.476838	0.164889	CENTER
A0A1B0GR13_304	tr|A0A1B0GR13|A0A1B0GR13_MOUSE	A0A1B0GR13	304	0.998	NAKKPLKTGGKKERDSDIDSGGSKDAKKEGK	S	D	I	D	5	2	3	0.146793	-0.408564	1.11734	1.10248	0.887912	STYX	-0.130886	0.608145	1.03591	0.0144337	NR
A0A1B0GR13_610	tr|A0A1B0GR13|A0A1B0GR13_MOUSE	A0A1B0GR13	610	1	SRERLPFPPCEPFRASPKPVHVCKCKESPSP	S	P	K	P	5	2	3	0.472758	-0.0930362	1.4137	1.37061	1.19533	STYX	0.189861	0.515088	1.32655	0.00664245	NR
A0A1B0GR91_118	tr|A0A1B0GR91|A0A1B0GR91_MOUSE	A0A1B0GR91	118	0.998	QHIANREAWGIHGHQSPPSCAAEPISIWGDS	S	P	P	S	5	2	3	-0.117397	-0.0428008	-0.0424479	-0.333694	0.22385	STYX	-0.0800989	0.663843	-0.0507639	0.728629	CENTER
A0A1B0GR91_79	tr|A0A1B0GR91|A0A1B0GR91_MOUSE	A0A1B0GR91	79	0.999	MDGRSVIWGCEGRPGTPVDDRGDNLDFVQQL	T	P	V	D	5	2	3	-0.124961	-0.344625	-0.133038	0.295285	0.250236	STYX	-0.234793	0.229327	0.137494	0.74857	CENTER
A0A1B0GSJ4_103	tr|A0A1B0GSJ4|A0A1B0GSJ4_MOUSE	A0A1B0GSJ4	103	0.999	CSPVTVKIAPPEGRGSPLASLEQGARIAEHP	S	P	L	A	5	2	3	0.436174	0.133897	0.44344	0.456522	0.813605	STYX	0.285035	0.201226	0.571189	0.108915	CENTER
A0A1B0GSX1_139	tr|A0A1B0GSX1|A0A1B0GSX1_MOUSE	A0A1B0GSX1	139	1	PTGAQQDGQQSCRVCSKPPILPGRGITNDCQ	S	K	P	P	4	2	2	-0.380983	-0.348798	0.631208	0.71202	NA	STYX	-0.364891	0.0790962	0.671614	0.127694	CENTER
A0A1B0GT05_9	tr|A0A1B0GT05|A0A1B0GT05_MOUSE,sp|O35153|BET1L_MOUSE	A0A1B0GT05	9	0.991	_______MADWTRAQSSGAVEDILDRENKRM	S	S	G	A	5	2	3	0.0798562	-0.0215205	-0.166907	-0.321419	-0.593739	STYX	0.0291679	0.827114	-0.360688	0.168914	CENTER
A0A1B0GT45_254	tr|A0A1B0GT45|A0A1B0GT45_MOUSE	A0A1B0GT45	254	0.981	FIPAFSEVSKPAKAPSPTSPCQPAPNPPYAP	S	P	T	S	4	2	2	0.0690628	-0.156844	0.111892	0.0833494	NA	STYX	-0.0438907	0.822558	0.0976205	0.87604	CENTER
A0A1B0GT45_317	tr|A0A1B0GT45|A0A1B0GT45_MOUSE	A0A1B0GT45	317	0.993	ARDLAHNPKQNSACTSPQTPPKSPTYAPFQS	S	P	Q	T	4	2	2	-0.111517	-0.254096	0.927482	0.395843	NA	STYX	-0.182807	0.318642	0.661663	0.152664	CENTER
A0A1B0GT45_800	tr|A0A1B0GT45|A0A1B0GT45_MOUSE	A0A1B0GT45	800	0.998	CLQKNLDLSQDSGLRSPAAIQDAGVLRSHSA	S	P	A	A	5	2	3	0.0430972	-0.192508	0.231374	0.304982	-0.141157	STYX	-0.0747057	0.701421	0.131733	0.764825	CENTER
A0A1D5RLM8_5406	tr|A0A1D5RLM8|A0A1D5RLM8_MOUSE,sp|Q80X60|EFCB3_MOUSE	A0A1D5RLM8	5406	0.993	LKAPVFHKRDKDLRGSFSDHLKHKESKLSPA	S	F	S	D	5	2	3	-0.486279	0.182359	0.582858	1.44381	1.2737	STYX	-0.15196	0.6098	1.10012	0.0173684	NR
A0A1D5RLM8_5408	tr|A0A1D5RLM8|A0A1D5RLM8_MOUSE,sp|Q80X60|EFCB3_MOUSE	A0A1D5RLM8	5408	0.997	APVFHKRDKDLRGSFSDHLKHKESKLSPAQL	S	D	H	L	5	2	3	-0.216377	-0.0419264	1.10536	0.904678	1.20294	STYX	-0.129152	0.487797	1.07099	0.0130161	NR
A0A1D5RM53_102	tr|A0A1D5RM53|A0A1D5RM53_MOUSE	A0A1D5RM53	102	1	RSDKNRTRTKAHLLPSPREKGPLPNSLTTGG	S	P	R	E	4	2	2	-0.0575703	0.335595	-0.161638	NA	0.701811	STYX	0.139013	0.536752	0.270086	0.634185	CENTER
A0A1D5RM53_32	tr|A0A1D5RM53|A0A1D5RM53_MOUSE	A0A1D5RM53	32	0.999	SQAAASLGGGQKLSCSEEFLTRISTELTDEA	S	E	E	F	5	2	3	-0.202436	0.0758474	1.27715	0.667884	1.51216	STYX	-0.0632943	0.752911	1.1524	0.0141114	NR
A0A1D5RM53_56	tr|A0A1D5RM53|A0A1D5RM53_MOUSE	A0A1D5RM53	56	0.998	TELTDEALFIARSRLSPLPNKEKNTKDQGTQ	S	P	L	P	5	2	3	-0.224148	0.0984829	1.13981	0.910127	1.22635	STYX	-0.0628328	0.757744	1.0921	0.0122508	NR
A0A1D5RMA1_196	tr|A0A1D5RMA1|A0A1D5RMA1_MOUSE	A0A1D5RMA1	196	0.999	GFVPYYRSPEERLRASPVVSSSVLGSSWE__	S	P	V	V	5	2	3	-0.557035	-0.154084	0.261038	0.140644	0.275033	STYX	-0.355559	0.131899	0.225572	0.517302	CENTER
A0A1D5RMD1_1009	tr|A0A1D5RMD1|A0A1D5RMD1_MOUSE	A0A1D5RMD1	1009	1	ALSWGELGISLSRALSRGELRPELNKATQGK	S	R	G	E	5	2	3	-0.470149	-0.405254	1.10216	0.236416	0.254312	STYX	-0.437701	0.0528221	0.530963	0.185274	CENTER
A0A1D5RMD1_1349	tr|A0A1D5RMD1|A0A1D5RMD1_MOUSE	A0A1D5RMD1	1349	0.991	GQGISGQPVSRWASASQQNTLLSQQHRACTI	S	Q	Q	N	4	2	2	0.052414	-0.313766	NA	0.0599313	-0.281295	STYQ	-0.130676	0.537197	-0.110682	0.644634	CENTER
A0A1D5RMD1_1383	tr|A0A1D5RMD1|A0A1D5RMD1_MOUSE	A0A1D5RMD1	1383	0.998	AWKGYRTRRQLSQKQSAAKMVQAVWRGHYTR	S	A	A	K	5	2	3	1.20434	-1.55374	1.52393	1.34711	-0.0396766	STYX	-0.174701	0.953105	0.943788	0.080875	NR
A0A1D5RMD1_170	tr|A0A1D5RMD1|A0A1D5RMD1_MOUSE	A0A1D5RMD1	170	0.999	EDQPPVMVTKETQFPSFDNLVPSQATAGPCA	S	F	D	N	5	2	3	-0.168425	-0.348969	0.227036	0.166389	0.407925	STYX	-0.258697	0.18372	0.267116	0.440179	CENTER
A0A1D5RMD1_229	tr|A0A1D5RMD1|A0A1D5RMD1_MOUSE	A0A1D5RMD1	229	1	KTFRSSCLMRHLEGDSLKIRHVASKTIKVGA	S	L	K	I	5	2	3	-0.338234	-0.100272	0.719736	1.66694	1.01608	STYX	-0.219253	0.264859	1.13425	0.015351	NR
A0A1D5RMD1_317 318	tr|A0A1D5RMD1|A0A1D5RMD1_MOUSE	A0A1D5RMD1	317 318	0.898	ATMSTAPRSAPQARPTSPATVMKMQATTSPT TMSTAPRSAPQARPTSPATVMKMQATTSPTS	T	S	P	A	5	2	3	-0.512557	-0.0928667	1.32455	0.45667	0.0967751	STYX	-0.302712	0.194795	0.625999	0.155105	CENTER
A0A1D5RMD1_318	tr|A0A1D5RMD1|A0A1D5RMD1_MOUSE	A0A1D5RMD1	318	0.989	TMSTAPRSAPQARPTSPATVMKMQATTSPTS	S	P	A	T	5	2	3	-0.446274	-0.317791	1.04247	0.262035	0.2516	STYX	-0.382033	0.0752722	0.518701	0.183907	CENTER
A0A1D5RMD1_429 430	tr|A0A1D5RMD1|A0A1D5RMD1_MOUSE	A0A1D5RMD1	429 430	0.899	QAQTYTVSTSSKTSPSSPTVKPSPQTRLAAM AQTYTVSTSSKTSPSSPTVKPSPQTRLAAML	S	S	P	T	5	2	3	-0.297472	-0.161931	0.61302	0.880516	0.247011	STYX	-0.229702	0.21975	0.580182	0.11639	CENTER
A0A1D5RMD1_430	tr|A0A1D5RMD1|A0A1D5RMD1_MOUSE	A0A1D5RMD1	430	0.996	AQTYTVSTSSKTSPSSPTVKPSPQTRLAAML	S	P	T	V	5	2	3	-0.0829127	-0.20276	1.15274	0.939266	0.114257	STYX	-0.142836	0.429763	0.735422	0.0846379	CENTER
A0A1D5RMD1_489	tr|A0A1D5RMD1|A0A1D5RMD1_MOUSE	A0A1D5RMD1	489	0.998	PRCSPQSPVVAGNTPSQVHLNSTRTKVTVST	S	Q	V	H	5	2	3	0.00769947	-0.0871018	0.395245	0.302362	-0.0147453	STYQ	-0.0397012	0.843812	0.227621	0.533508	CENTER
A0A1D5RMD1_515	tr|A0A1D5RMD1|A0A1D5RMD1_MOUSE	A0A1D5RMD1	515	0.993	VTVSTKQATTVVKVNSQSYLGRCGSQGNLDT	S	Q	S	Y	5	2	3	-0.133556	-0.839191	0.788319	0.598725	0.189246	STYQ	-0.486374	0.119025	0.52543	0.150214	CENTER
A0A1D5RMD1_622	tr|A0A1D5RMD1|A0A1D5RMD1_MOUSE	A0A1D5RMD1	622	0.99	PVTLTQAQLAVPLTKSSSQIQPPPCHARTQP	S	S	S	Q	4	2	2	0.121925	-0.102103	0.467663	0.322196	NA	STYX	0.0099111	0.933578	0.39493	0.336934	CENTER
A0A1D5RMD1_784	tr|A0A1D5RMD1|A0A1D5RMD1_MOUSE	A0A1D5RMD1	784	0.999	AACQVCPSTKLSKAPSLAQLITCLAKVPSQA	S	L	A	Q	5	2	3	0.316537	-0.135515	0.558573	0.0875144	0.461572	STYX	0.0905113	0.725344	0.36922	0.297794	CENTER
A0A1D5RMD1_797	tr|A0A1D5RMD1|A0A1D5RMD1_MOUSE	A0A1D5RMD1	797	0.999	APSLAQLITCLAKVPSQAQLATETAKCLLAA	S	Q	A	Q	5	2	3	0.0368537	-0.64053	0.829489	0.707843	0.375953	STYQ	-0.301838	0.325849	0.637762	0.081069	CENTER
A0A1D5RMD1_824	tr|A0A1D5RMD1|A0A1D5RMD1_MOUSE	A0A1D5RMD1	824	0.995	LLAAHPTTDHRSKTQSQTFLSSSKASVQLWQ	S	Q	T	F	5	2	3	0.370613	-0.479578	0.645178	0.616981	0.128953	STYQ	-0.0544826	0.842491	0.463704	0.197801	CENTER
A0A1D5RMD1_910	tr|A0A1D5RMD1|A0A1D5RMD1_MOUSE	A0A1D5RMD1	910	0.997	PVCNAESWGDSGRAQTPPPSPVPNQAVPCHD	T	P	P	P	5	2	3	0.309382	0.0387744	0.0904726	-0.227182	-0.374818	STYX	0.174078	0.385432	-0.170509	0.440645	CENTER
A0A1D5RMD1_996	tr|A0A1D5RMD1|A0A1D5RMD1_MOUSE	A0A1D5RMD1	996	0.999	ALPQGMLGMALMKALSWGELGISLSRALSRG	S	W	G	E	4	2	2	-0.164694	-0.336096	NA	0.456937	0.0839656	STYX	-0.250395	0.193558	0.270452	0.54152	CENTER
A0A1L1SR47_721	tr|A0A1L1SR47|A0A1L1SR47_MOUSE	A0A1L1SR47	721	0.999	GIPFRSTPSSKLPLGSGQLQSTKEASKDILQ	S	G	Q	L	4	2	2	-0.584506	-0.332494	0.763256	0.440433	NA	STYX	-0.4585	0.0561141	0.601844	0.171178	CENTER
A0A1L1SU27_554	tr|A0A1L1SU27|A0A1L1SU27_MOUSE	A0A1L1SU27	554	1	KLLQPLVGLEAAELGSPGKRFLALRSQLTEF	S	P	G	K	5	2	3	0.441939	0.580661	0.727642	0.370841	0.760412	STYX	0.5113	0.0608657	0.619632	0.0872727	CENTER
A0A1L1SU27_744	tr|A0A1L1SU27|A0A1L1SU27_MOUSE	A0A1L1SU27	744	0.988	TDCHRPEARGGVRPRSSPPVPLSGSSDFRSP	S	S	P	P	5	2	3	-0.149804	-0.0652117	0.75584	0.443951	0.524169	STYX	-0.107508	0.54839	0.574654	0.104319	CENTER
A0A1L1SU27_744 745	tr|A0A1L1SU27|A0A1L1SU27_MOUSE	A0A1L1SU27	744 745	0.869	TDCHRPEARGGVRPRSSPPVPLSGSSDFRSP DCHRPEARGGVRPRSSPPVPLSGSSDFRSPN	S	S	P	P	5	2	3	0.279491	0.244617	0.176951	0.13084	0.703296	STYX	0.262054	0.190643	0.337029	0.363596	CENTER
A0A1W2P6Q8_424	tr|A0A1W2P6Q8|A0A1W2P6Q8_MOUSE,tr|A0A1W2P7H4|A0A1W2P7H4_MOUSE,tr|A0A1W2P7S8|A0A1W2P7S8_MOUSE,tr|A0A1W2P7Z8|A0A1W2P7Z8_MOUSE,tr|A0A1W2P855|A0A1W2P855_MOUSE,sp|Q6A068|CDC5L_MOUSE	A0A1W2P6Q8	424	1	LSTPLRTPSNGAEGLTPRSGTTPKPVTNATP	T	P	R	S	5	2	3	0.0772291	0.210927	0.0642722	0.0732212	0.000585751	STYX	0.144078	0.417118	0.0460264	0.998247	CENTER
A0A1W2P6Q8_430	tr|A0A1W2P6Q8|A0A1W2P6Q8_MOUSE,tr|A0A1W2P7H4|A0A1W2P7H4_MOUSE,tr|A0A1W2P7S8|A0A1W2P7S8_MOUSE,tr|A0A1W2P7Z8|A0A1W2P7Z8_MOUSE,tr|A0A1W2P855|A0A1W2P855_MOUSE,sp|Q6A068|CDC5L_MOUSE	A0A1W2P6Q8	430	0.986	TPSNGAEGLTPRSGTTPKPVTNATPGRTPLR	T	P	K	P	5	2	3	0.514255	0.231181	0.0572274	-0.0124758	0.314451	STYX	0.372718	0.121849	0.119734	0.795212	CENTER
A0A1W2P6U8_1122	tr|A0A1W2P6U8|A0A1W2P6U8_MOUSE	A0A1W2P6U8	1122	0.998	VDPEKAKPEPGLQSLSPKESVEGIQIPNVKS	S	P	K	E	5	2	3	0.201264	-0.468815	1.46523	0.767313	0.705276	STYX	-0.133775	0.648149	0.979273	0.0236545	NR
A0A1W2P6U8_1621	tr|A0A1W2P6U8|A0A1W2P6U8_MOUSE	A0A1W2P6U8	1621	0.995	LTVEECLKRIKSTVVSPSNSLKRDIKSVKLI	S	P	S	N	4	2	2	0.00800443	0.00162345	0.869462	NA	0.341002	STYX	0.00481394	0.941367	0.605232	0.183848	CENTER
A0A1W2P6U8_195	tr|A0A1W2P6U8|A0A1W2P6U8_MOUSE	A0A1W2P6U8	195	0.983	APYSPEKELSVSRNRSTPLPTFQLMDTEKSD	S	T	P	L	4	2	2	-0.0380746	-0.341822	NA	-0.00145002	0.903973	STYX	-0.189948	0.354325	0.451262	0.389113	CENTER
A0A1W2P6U8_2432	tr|A0A1W2P6U8|A0A1W2P6U8_MOUSE	A0A1W2P6U8	2432	0.978	RSPKINSGPHLQGVKSSEGISGDTVPKEKPM	S	S	E	G	4	2	2	0.113098	-0.378767	NA	0.924665	0.512873	STYX	-0.132834	0.579559	0.718769	0.119398	CENTER
A0A1W2P6U8_4201	tr|A0A1W2P6U8|A0A1W2P6U8_MOUSE	A0A1W2P6U8	4201	0.993	LYTREDSVSRKQSKISPCGSPTRTFESQHSL	S	P	C	G	5	2	3	0.192197	0.0162483	0.463631	0.558356	0.610638	STYX	0.104223	0.550417	0.544208	0.116909	CENTER
A0A1W2P6U8_4771	tr|A0A1W2P6U8|A0A1W2P6U8_MOUSE,sp|Q8CAF4|NHSL1_MOUSE,sp|Q9D2D7|ZN687_MOUSE	A0A1W2P6U8	4771	0.993	PGSPSRRSPRSPSRRSPGSLSRRSPRRPSKR	S	P	G	S	4	2	2	0.264383	-0.269706	1.11571	NA	0.830498	STYX	-0.00266125	0.954809	0.973104	0.0542368	NR
A0A1W2P6U8_4875	tr|A0A1W2P6U8|A0A1W2P6U8_MOUSE	A0A1W2P6U8	4875	1	PRSLSWRSPHRCSRRSPCRPLERRGHSSSVK	S	P	C	R	5	2	3	0.17732	-0.245726	1.27887	0.919099	1.54392	STYX	-0.0342029	0.863765	1.2473	0.00906449	NR
A0A1W2P884_158	tr|A0A1W2P884|A0A1W2P884_MOUSE	A0A1W2P884	158	0.988	SSLDMKDFRPLRKWSSLSKLTAPDTRNHSGI	S	L	S	K	4	2	2	-0.129309	0.0401852	NA	1.21843	1.64653	STYX	-0.0445618	0.822032	1.43248	0.0245502	NR
A0A1W2P884_349 350 351	tr|A0A1W2P884|A0A1W2P884_MOUSE	A0A1W2P884	349 350 351	0.897	GSETPMQVLTGSSRQSYSPPGFQDFSKWESV SETPMQVLTGSSRQSYSPPGFQDFSKWESVL ETPMQVLTGSSRQSYSPPGFQDFSKWESVLK	S	Y	S	P	4	2	2	0.0196921	-0.312241	0.313478	0.244458	NA	STYX	-0.146274	0.477271	0.278968	0.497281	CENTER
A0A1Y7VN40_1012	tr|A0A1Y7VN40|A0A1Y7VN40_MOUSE	A0A1Y7VN40	1012	1	HQEFRYRGNGDKQQPSPAAQRAYYPDQDRSK	S	P	A	A	4	2	2	-0.0765203	-0.0285494	1.1627	NA	0.313936	STYX	-0.0525348	0.789189	0.738317	0.148289	CENTER
A0A286YCV9_1380 1381	tr|A0A286YCV9|A0A286YCV9_MOUSE	A0A286YCV9	1380 1381	0.896	KEQLTGKGKLSRRSISSPSMNRLSGSRQELS EQLTGKGKLSRRSISSPSMNRLSGSRQELSP	S	S	P	S	5	2	3	0.0113319	0.222988	-0.603228	-0.783898	-0.51916	STYX	0.11716	0.520626	-0.635429	0.0365774	CENTER
A0A286YCV9_1409	tr|A0A286YCV9|A0A286YCV9_MOUSE	A0A286YCV9	1409	0.999	LSPSHSLGSNKGRWESQQDVSQTLVSRGIAP	S	Q	Q	D	5	2	3	-0.0643803	-0.310937	-0.36973	-0.870844	-0.639379	STYQ	-0.187659	0.33785	-0.626651	0.0434482	CENTER
A0A286YCV9_1657 1658	tr|A0A286YCV9|A0A286YCV9_MOUSE	A0A286YCV9	1657 1658	0.894	VPRAPLLSEPASAVPTSPFRIRKVRTSELKS PRAPLLSEPASAVPTSPFRIRKVRTSELKSF	T	S	P	F	5	2	3	-0.0710764	-0.201029	-0.202467	-0.155808	0.108707	STYX	-0.136053	0.453132	-0.0831894	0.633197	CENTER
A0A286YCV9_1658	tr|A0A286YCV9|A0A286YCV9_MOUSE	A0A286YCV9	1658	0.983	PRAPLLSEPASAVPTSPFRIRKVRTSELKSF	S	P	F	R	5	2	3	-0.22681	0.0947371	-0.037708	-0.0105155	0.135422	STYX	-0.0660365	0.745786	0.029066	0.950411	CENTER
A0A286YCV9_1708 1709	tr|A0A286YCV9|A0A286YCV9_MOUSE	A0A286YCV9	1708 1709	0.899	DPSNARGQTLGRLEVTSDSEDASEVPEWLRE PSNARGQTLGRLEVTSDSEDASEVPEWLREG	T	S	D	S	5	2	3	-0.361425	-0.0816557	-0.268771	-0.380838	0.0228247	STYX	-0.22154	0.272506	-0.208928	0.363735	CENTER
A0A286YCV9_1709	tr|A0A286YCV9|A0A286YCV9_MOUSE	A0A286YCV9	1709	0.992	PSNARGQTLGRLEVTSDSEDASEVPEWLREG	S	D	S	E	5	2	3	-0.750537	-0.195092	-0.119835	-0.429372	0.0523921	STYX	-0.472814	0.088874	-0.165605	0.459165	CENTER
A0A286YCV9_1798	tr|A0A286YCV9|A0A286YCV9_MOUSE	A0A286YCV9	1798	0.986	RPSRVRRAVGTGRRRSSGLQPQGAPEVRRSA	S	S	G	L	5	2	3	-0.282363	0.256187	-0.678345	-0.684348	-1.11707	STYX	-0.0130881	0.92517	-0.826587	0.0174892	CENTER
A0A286YCV9_912	tr|A0A286YCV9|A0A286YCV9_MOUSE	A0A286YCV9	912	0.994	QQEPVTVAPEVDTSSSPTSKQPQCMVVFDHC	S	P	T	S	4	2	2	-0.12573	-0.180178	0.677159	-0.227238	NA	STYX	-0.152954	0.387097	0.22496	0.721517	CENTER
A0A286YDG0_12	tr|A0A286YDG0|A0A286YDG0_MOUSE,tr|D3YXI8|D3YXI8_MOUSE,tr|D3Z235|D3Z235_MOUSE,tr|D3Z236|D3Z236_MOUSE,tr|L7N292|L7N292_MOUSE,tr|L7N2D0|L7N2D0_MOUSE,tr|Q5EBJ2|Q5EBJ2_MOUSE,tr|Q9DAR5|Q9DAR5_MOUSE	A0A286YDG0	12	0.99	____MGSQAGSFRKASPQTPNIDENEKRIKR	S	P	Q	T	5	2	3	-0.276462	-0.115456	0.854291	0.668435	0.329047	STYX	-0.195959	0.291172	0.617258	0.0919162	CENTER
A0A286YDG0_15	tr|A0A286YDG0|A0A286YDG0_MOUSE,tr|D3YXI8|D3YXI8_MOUSE,tr|D3Z235|D3Z235_MOUSE,tr|D3Z236|D3Z236_MOUSE,tr|L7N292|L7N292_MOUSE,tr|L7N2D0|L7N2D0_MOUSE,tr|Q5EBJ2|Q5EBJ2_MOUSE,tr|Q9DAR5|Q9DAR5_MOUSE	A0A286YDG0	15	0.999	_MGSQAGSFRKASPQTPNIDENEKRIKRLEK	T	P	N	I	5	2	3	-0.118356	-0.0161039	0.574996	0.957061	0.529031	STYX	-0.06723	0.71919	0.687029	0.0648329	CENTER
A0A2I3BRL8_102	tr|A0A2I3BRL8|A0A2I3BRL8_MOUSE,sp|Q91VM5|RMXL1_MOUSE	A0A2I3BRL8	102	1	PSFESGRRGPPPPPRSRGPPRGLRGGSGGTR	S	R	G	P	5	2	3	0.221327	-0.290867	0.995543	0.822403	0.344169	STYX	-0.03477	0.862969	0.720705	0.0621497	CENTER
A0A2I3BRL8_121	tr|A0A2I3BRL8|A0A2I3BRL8_MOUSE,sp|Q91VM5|RMXL1_MOUSE	A0A2I3BRL8	121	0.998	PRGLRGGSGGTRGPPSRGGYMDDGGYSMNFN	S	R	G	G	4	2	2	-0.0385541	0.630627	NA	0.405965	0.344335	STYX	0.296037	0.352165	0.37515	0.360555	CENTER
A0A2I3BRL8_138 139 140	tr|A0A2I3BRL8|A0A2I3BRL8_MOUSE,sp|Q91VM5|RMXL1_MOUSE	A0A2I3BRL8	138 139 140	0.875	GGYMDDGGYSMNFNMSSSRGPLPVKRGPPPR GYMDDGGYSMNFNMSSSRGPLPVKRGPPPRS YMDDGGYSMNFNMSSSRGPLPVKRGPPPRSG	S	S	S	R	4	2	2	-0.394375	-0.292011	NA	0.341436	0.697804	STYX	-0.343193	0.0935314	0.51962	0.229847	CENTER
A0A2I3BRL8_162 163	tr|A0A2I3BRL8|A0A2I3BRL8_MOUSE,sp|Q91VM5|RMXL1_MOUSE	A0A2I3BRL8	162 163	0.899	KRGPPPRSGGPPPKRSTPSGPVRSSSGMGGR RGPPPRSGGPPPKRSTPSGPVRSSSGMGGRT	S	T	P	S	5	2	3	0.494762	0.470162	-0.198029	-0.0651045	-0.139739	STYX	0.482462	0.066178	-0.134291	0.505285	CENTER
A0A2I3BRL8_163	tr|A0A2I3BRL8|A0A2I3BRL8_MOUSE,sp|Q91VM5|RMXL1_MOUSE	A0A2I3BRL8	163	0.992	RGPPPRSGGPPPKRSTPSGPVRSSSGMGGRT	T	P	S	G	5	2	3	0.662503	0.216268	0.0406772	0.102378	0.0106878	STYX	0.439386	0.108662	0.0512476	0.981874	CENTER
A0A2I3BRL8_205	tr|A0A2I3BRL8|A0A2I3BRL8_MOUSE,sp|Q91VM5|RMXL1_MOUSE,sp|Q9WV02|RBMX_MOUSE	A0A2I3BRL8	205	0.998	PPRREPLPSRRDVYLSPRDDGYSTKDNYSSR	S	P	R	D	5	2	3	0.0190688	0.313885	-0.186329	-0.0382154	-0.221269	STYX	0.166477	0.41486	-0.148604	0.472841	CENTER
A0A2I3BRL8_323	tr|A0A2I3BRL8|A0A2I3BRL8_MOUSE,sp|Q91VM5|RMXL1_MOUSE,sp|Q9WV02|RBMX_MOUSE	A0A2I3BRL8	323	0.995	DDYSSSRDGYGGSRDSYSSSRSDLYSSGRDR	S	Y	S	S	5	2	3	0.121788	0.336397	-0.0671674	0.15108	-0.269204	STYX	0.229093	0.2567	-0.0617637	0.694191	CENTER
A0A2I3BRL8_349	tr|A0A2I3BRL8|A0A2I3BRL8_MOUSE,sp|Q91VM5|RMXL1_MOUSE,sp|Q9WV02|RBMX_MOUSE	A0A2I3BRL8	349	1	SGRDRVGRQERGLPPSMERGYPPPRDSYSSS	S	M	E	R	5	2	3	-0.0169186	-0.077062	-0.178487	-0.190038	-0.0974334	STYX	-0.0469903	0.811891	-0.155319	0.457734	CENTER
A0A2I3BRL8_88	tr|A0A2I3BRL8|A0A2I3BRL8_MOUSE,sp|Q91VM5|RMXL1_MOUSE,sp|Q9WV02|RBMX_MOUSE	A0A2I3BRL8	88	0.996	SLDGKAIKVEQATKPSFESGRRGPPPPPRSR	S	F	E	S	5	2	3	0.268439	0.207333	-0.364541	-0.500125	-0.65866	STYX	0.237886	0.221787	-0.507775	0.0710281	CENTER
A0A2R8VHF3_48	tr|A0A2R8VHF3|A0A2R8VHF3_MOUSE,sp|P05213|TBA1B_MOUSE,sp|P05214|TBA3_MOUSE,sp|P68369|TBA1A_MOUSE,sp|P68373|TBA1C_MOUSE	A0A2R8VHF3	48	0.997	DGQMPSDKTIGGGDDSFNTFFSETGAGKHVP	S	F	N	T	5	2	3	-0.27398	-0.383825	-0.252143	-0.357038	-0.176867	STYX	-0.328903	0.10298	-0.262016	0.265946	CENTER
A0A2R8VHF7_150	tr|A0A2R8VHF7|A0A2R8VHF7_MOUSE	A0A2R8VHF7	150	0.998	SYRHVVRHWPLGASFSPGIVQRKTQVYTKSS	S	P	G	I	5	2	3	-0.265728	0.176344	0.642475	-0.1719	0.423361	STYX	-0.0446916	0.829483	0.297979	0.451721	CENTER
A0A2R8VJU7_332	tr|A0A2R8VJU7|A0A2R8VJU7_MOUSE	A0A2R8VJU7	332	1	HVLPRGPGWVNLAPVSPGQLMAPGPGKVRKR	S	P	G	Q	5	2	3	0.0312263	0.770473	0.725923	0.288811	0.611003	STYX	0.40085	0.233673	0.541912	0.127391	CENTER
A0A2R8W6I7_198	tr|A0A2R8W6I7|A0A2R8W6I7_MOUSE,sp|P55194|3BP1_MOUSE	A0A2R8W6I7	198	0.999	TALAELRDNHSQADHSPLTTAAPFSRVYGVS	S	P	L	T	5	2	3	0.38641	-0.328575	-0.258101	0.0293588	-0.347403	STYX	0.0289174	0.992861	-0.192049	0.391954	CENTER
A0A2R8W6I7_471	tr|A0A2R8W6I7|A0A2R8W6I7_MOUSE,sp|P55194|3BP1_MOUSE	A0A2R8W6I7	471	0.992	MAVRERTEADLPKPTSPKVSRNPTETAASAE	S	P	K	V	5	2	3	-0.108175	0.122007	-1.18886	-1.19678	-1.23174	STYX	0.0069161	0.94728	-1.20579	0.00516628	NR
A0A338P6G8_13	tr|A0A338P6G8|A0A338P6G8_MOUSE	A0A338P6G8	13	0.998	___MQKEASQGQSLGSIEELNVGRSEEEAEQ	S	I	E	E	4	2	2	-0.54857	-0.126417	-0.2586	-0.184926	NA	STYX	-0.337493	0.154923	-0.221763	0.422901	CENTER
A0A338P6R8_17	tr|A0A338P6R8|A0A338P6R8_MOUSE	A0A338P6R8	17	1	DSLAAPQDRLVEQLLSPRTQAQRRLKDIDKQ	S	P	R	T	4	2	2	0.0164587	0.309434	NA	0.321349	1.16586	STYX	0.162946	0.422696	0.743604	0.145536	CENTER
A0A338P6R8_336	tr|A0A338P6R8|A0A338P6R8_MOUSE,sp|Q9Z2Q6|SEPT5_MOUSE	A0A338P6R8	336	0.999	IQQMTSKLTQDSRMESPIPILPLPTPDAETE	S	P	I	P	5	2	3	-0.0881069	-0.173001	0.564773	0.592505	0.712831	STYX	-0.130554	0.463431	0.623369	0.0797527	CENTER
A16L1_287	sp|Q8C0J2|A16L1_MOUSE	Q8C0J2	287	0.996	AGGLLDSITNIFGRRSVSSIPVPQDIMDTHP	S	V	S	S	5	2	3	-0.472271	-0.0545592	-0.579091	-0.832541	-0.7947	STYX	-0.263415	0.253691	-0.735444	0.0234329	CENTER
A1L3P4_687	tr|A1L3P4|A1L3P4_MOUSE	A1L3P4	687	0.999	ELVIRGTRLVLPMDDSEPALNSLDDTRHSPA	S	E	P	A	5	2	3	-0.818633	0.00712789	-0.420702	-0.219333	-0.168757	STYX	-0.405753	0.258308	-0.269597	0.260185	CENTER
A1L3P4_700	tr|A1L3P4|A1L3P4_MOUSE	A1L3P4	700	0.998	DDSEPALNSLDDTRHSPA_____________	S	P	A	_	5	2	3	-0.234093	-0.163976	-0.0177953	-0.448547	-0.0320454	STYX	-0.199035	0.269127	-0.166129	0.460917	CENTER
A2A484_410	tr|A2A484|A2A484_MOUSE	A2A484	410	0.997	TDKQEKVKLNFDMTASPKILLSKPLLSGGAG	S	P	K	I	5	2	3	-0.00934626	-0.0633575	-0.769225	-0.597823	-0.86787	STYX	-0.0363519	0.867395	-0.744972	0.0222943	CENTER
A2A484_553	tr|A2A484|A2A484_MOUSE	A2A484	553	0.998	LSESVQQQSAPVPLISPKRQIRSRFQLNLDK	S	P	K	R	5	2	3	-0.0735907	-0.171159	-0.595946	-0.552594	-0.908144	STYX	-0.122375	0.49261	-0.685561	0.0302574	CENTER
A2A484_658	tr|A2A484|A2A484_MOUSE	A2A484	658	0.994	KPTNQVEVKEEAKSNSPVSEKPDPTPAKDKA	S	P	V	S	5	2	3	-0.0266224	-0.153065	-1.60744	-1.18317	-1.14225	STYX	-0.0898437	0.624063	-1.31095	0.00472612	NR
A2A484_763	tr|A2A484|A2A484_MOUSE	A2A484	763	0.999	AIGKPPPSSTSAGNQSPPETPVLTRSATQAP	S	P	P	E	5	2	3	-0.104443	-0.268055	-0.45575	-0.78591	-0.606255	STYX	-0.186249	0.314834	-0.615972	0.0411649	CENTER
A2A4P4_219	tr|A2A4P4|A2A4P4_MOUSE,sp|Q3THG9|AASD1_MOUSE	A2A4P4	219	0.998	TRRGAQADHFTESPLSPGSQVQVRVDWERRF	S	P	G	S	4	2	2	-0.253677	0.107287	NA	0.09096	-0.096378	STYX	-0.073195	0.724162	-0.002709	0.885416	CENTER
A2A5N3_342	tr|A2A5N3|A2A5N3_MOUSE,sp|P29341|PABP1_MOUSE,tr|Q62029|Q62029_MOUSE,tr|Q6PHQ9|Q6PHQ9_MOUSE,tr|Q9D4E6|Q9D4E6_MOUSE	A2A5N3	342	0.995	TESSHSKGFGFVCFSSPEEATKAVTEMNGRI	S	P	E	E	5	2	3	0.071324	0.0127907	1.11791	1.15137	0.858865	STYX	0.0420574	0.770191	1.04271	0.0142874	NR
A2A654_1302	tr|A2A654|A2A654_MOUSE	A2A654	1302	0.999	KPDPKDQVLDDVSIQSPGPNCQRQNSVESDL	S	P	G	P	5	2	3	-0.0805883	-0.0588097	-0.453638	-0.365077	-0.262937	STYX	-0.069699	0.709615	-0.36055	0.15389	CENTER
A2A654_1388	tr|A2A654|A2A654_MOUSE	A2A654	1388	1	VVSSSKSTLPASVPKSPRDRDARAFSKAVDF	S	P	R	D	5	2	3	0.288276	0.422887	0.0364261	-0.122457	-0.110515	STYX	0.355581	0.117646	-0.065515	0.681114	CENTER
A2A654_1674	tr|A2A654|A2A654_MOUSE	A2A654	1674	1	EDMETESPEVKRVIPSPVRTGEGSNLSKGFM	S	P	V	R	5	2	3	0.150483	0.512974	0.415013	0.387538	0.0480655	STYX	0.331729	0.167472	0.283539	0.424041	CENTER
A2A654_228	tr|A2A654|A2A654_MOUSE	A2A654	228	1	SSTPGRRKPRVHRPRSPILEEKDIPPLEFPK	S	P	I	L	5	2	3	0.185489	-0.0098917	0.0197509	0.374315	0.184556	STYX	0.0877984	0.613036	0.192874	0.609765	CENTER
A2A654_2468	tr|A2A654|A2A654_MOUSE	A2A654	2468	0.998	QPQSSVQGQSPVRVQSPPLTRIRPSTPSQVT	S	P	P	L	5	2	3	0.145583	0.126252	-0.250485	0.0619762	-0.141121	STYX	0.135918	0.419772	-0.109877	0.567871	CENTER
A2A6P4_62	tr|A2A6P4|A2A6P4_MOUSE	A2A6P4	62	0.997	TAPTVRCRRGAAPRRSPSPAAMSERLRPRKR	S	P	S	P	5	2	3	0.1519	0.101361	0.0945419	-0.136839	0.205896	STYX	0.12663	0.452319	0.054533	0.976122	CENTER
A2A6P4_64	tr|A2A6P4|A2A6P4_MOUSE	A2A6P4	64	0.995	PTVRCRRGAAPRRSPSPAAMSERLRPRKRRR	S	P	A	A	5	2	3	0.693215	-0.237724	0.265626	-0.0835602	-0.255515	STYX	0.227745	0.690107	-0.024483	0.792836	CENTER
A2A6P4_82	tr|A2A6P4|A2A6P4_MOUSE	A2A6P4	82	0.999	AMSERLRPRKRRRNGSDDDNHPPPQTKRSSR	S	D	D	D	5	2	3	0.418447	-0.155498	-0.623742	-0.769111	-0.129586	STYX	0.131474	0.676062	-0.50748	0.0906339	CENTER
A2A716_393	tr|A2A716|A2A716_MOUSE	A2A716	393	0.999	FAKDDTIGRVGRLHGSVPNLSRYLESRDTSG	S	V	P	N	5	2	3	-0.403823	-0.0268456	0.643156	-0.507123	-0.376468	STYX	-0.215334	0.324079	-0.0801453	0.614918	CENTER
A2A7B5_441	tr|A2A7B5|A2A7B5_MOUSE	A2A7B5	441	0.995	PDDGKGENVTSKDESSPPQLGQDCLILNSEK	S	P	P	Q	5	2	3	0.18499	-0.121137	0.221362	-0.122051	0.490593	STYX	0.0319266	0.867749	0.196635	0.62742	CENTER
A2A7B5_638	tr|A2A7B5|A2A7B5_MOUSE	A2A7B5	638	0.998	SPSSTNCESKKRRTASPPVLPKIKAETDSDS	S	P	P	V	5	2	3	0.0537144	0.162798	-0.0302774	-0.105404	-0.208916	STYX	0.108256	0.51953	-0.114866	0.551543	CENTER
A2A7B5_733 734 735 738 739	tr|A2A7B5|A2A7B5_MOUSE	A2A7B5	733 734 735 738 739	0.88	PASMLAVTSSRFKRRTSSPPSSPQHSPALRD ASMLAVTSSRFKRRTSSPPSSPQHSPALRDF SMLAVTSSRFKRRTSSPPSSPQHSPALRDFG AVTSSRFKRRTSSPPSSPQHSPALRDFGKQS VTSSRFKRRTSSPPSSPQHSPALRDFGKQSD	T	S	S	P	4	2	2	0.345275	-0.0165519	-0.0891426	0.0461547	NA	STYX	0.164361	0.452048	-0.0214939	0.841105	CENTER
A2A7B5_735	tr|A2A7B5|A2A7B5_MOUSE	A2A7B5	735	0.981	SMLAVTSSRFKRRTSSPPSSPQHSPALRDFG	S	P	P	S	4	2	2	-0.212732	0.280453	NA	0.898044	-0.0191952	STYX	0.0338603	0.918735	0.439424	0.405956	CENTER
A2A7B5_792	tr|A2A7B5|A2A7B5_MOUSE	A2A7B5	792	0.997	SPAWSLSGRDERETGSPPCFDEYKISKEWAA	S	P	P	C	5	2	3	0.1091	-0.0764035	-0.0814371	-0.148679	-0.0931499	STYX	0.0163483	0.900445	-0.107755	0.570897	CENTER
A2A7F4_631	tr|A2A7F4|A2A7F4_MOUSE	A2A7F4	631	0.996	KKLLLKSAQRGIYPKSPTGSLEQNPEQARGE	S	P	T	G	5	2	3	0.261371	0.0857521	-0.0532913	-0.531162	-0.802252	STYX	0.173562	0.354325	-0.462235	0.121762	CENTER
A2A9H6_3631 3632	tr|A2A9H6|A2A9H6_MOUSE	A2A9H6	3631 3632	0.899	TQDKLWEVKKRSSVKSSAESSEVAETPR___ QDKLWEVKKRSSVKSSAESSEVAETPR____	S	S	A	E	4	2	2	0.0183484	-0.278265	NA	0.715411	0.732979	STYX	-0.129958	0.513781	0.724195	0.107156	CENTER
A2AB62_12	tr|A2AB62|A2AB62_MOUSE	A2AB62	12	0.992	____MEGSRGQKTKRSPSTLRRPPQKPRNIL	S	P	S	T	5	2	3	0.031688	0.123736	1.94551	1.41627	1.11232	STYX	0.0777122	0.622312	1.49137	0.00600635	NR
A2ADM8_455	tr|A2ADM8|A2ADM8_MOUSE,sp|Q5HZG4|TAF3_MOUSE	A2ADM8	455	1	FDIRALEPSRRRAALSPARSTFTPLEKARPL	S	P	A	R	5	2	3	0.194311	0.438328	0.556118	0.564676	0.307913	STYX	0.31632	0.158747	0.476236	0.167376	CENTER
A2ADW8_19	tr|A2ADW8|A2ADW8_MOUSE,tr|A2AJU2|A2AJU2_MOUSE,tr|A2BI02|A2BI02_MOUSE,tr|A2BI72|A2BI72_MOUSE,tr|B1AV09|B1AV09_MOUSE,tr|B1AVZ5|B1AVZ5_MOUSE,tr|B1B0X0|B1B0X0_MOUSE,tr|B1B0X6|B1B0X6_MOUSE,tr|E9QA14|E9QA14_MOUSE,tr|Q62012|Q62012_MOUSE	A2ADW8	19	0.999	REDEIRQLRYLEAANSEEEYNEENDIQSESS	S	E	E	E	5	2	3	-0.107855	-0.0982293	-0.0640772	-0.28728	-0.278741	STYX	-0.103042	0.563871	-0.210032	0.353302	CENTER
A2ADW8_384	tr|A2ADW8|A2ADW8_MOUSE,tr|A2AJU2|A2AJU2_MOUSE,tr|A2BI02|A2BI02_MOUSE,tr|A2BI72|A2BI72_MOUSE,tr|B1AV09|B1AV09_MOUSE,tr|B1B0X0|B1B0X0_MOUSE,tr|B1B0X6|B1B0X6_MOUSE,tr|E9QA14|E9QA14_MOUSE,tr|Q62012|Q62012_MOUSE	A2ADW8	384	0.998	ERYHGPRGRNGPRDASPPGSEPEIDRSSAIR	S	P	P	G	5	2	3	-0.0314433	0.102243	-0.103992	-0.193294	-0.636363	STYX	0.0353996	0.803521	-0.311216	0.236914	CENTER
A2ADW8_443	tr|A2ADW8|A2ADW8_MOUSE,tr|A2AJU2|A2AJU2_MOUSE,tr|A2BI02|A2BI02_MOUSE,tr|A2BI72|A2BI72_MOUSE,tr|B1AV09|B1AV09_MOUSE,tr|B1AVZ5|B1AVZ5_MOUSE,tr|B1AZM2|B1AZM2_MOUSE,tr|B1B0X0|B1B0X0_MOUSE,tr|B1B0X6|B1B0X6_MOUSE,tr|E9QA14|E9QA14_MOUSE,tr|Q62012|Q62012_MOUSE	A2ADW8	443	0.999	SAEESDESFDRLTCRSMLDTLY_________	S	M	L	D	5	2	3	-0.732845	0.221074	-0.00761901	-0.261173	0.331673	STYX	-0.255886	0.567831	0.0209602	0.914342	CENTER
A2AF73_226 227	tr|A2AF73|A2AF73_MOUSE	A2AF73	226 227	0.885	INKELDKLEDTVGKRSSLVMKEEDRQHWDDV NKELDKLEDTVGKRSSLVMKEEDRQHWDDVK	S	S	L	V	5	2	3	-0.3632	0.121285	1.31811	1.14385	1.53987	STYX	-0.120958	0.611535	1.33394	0.00680326	NR
A2AF73_227	tr|A2AF73|A2AF73_MOUSE	A2AF73	227	0.994	NKELDKLEDTVGKRSSLVMKEEDRQHWDDVK	S	L	V	M	5	2	3	-0.374554	0.0747932	0.700859	1.34058	1.38667	STYX	-0.14988	0.515597	1.1427	0.0134982	NR
A2AF73_338	tr|A2AF73|A2AF73_MOUSE	A2AF73	338	0.988	SKRPSETASSIQKQPSFTEPKMSQEHLERKT	S	F	T	E	5	2	3	0.245275	0.223611	0.242506	0.223925	1.34307	STYX	0.234443	0.225642	0.603166	0.173116	CENTER
A2AF73_345	tr|A2AF73|A2AF73_MOUSE	A2AF73	345	1	ASSIQKQPSFTEPKMSQEHLERKTSISSMRT	S	Q	E	H	5	2	3	0.410448	-0.0816035	1.21238	1.34336	1.64914	STYQ	0.164422	0.529062	1.40162	0.00605335	NR
A2AF73_400	tr|A2AF73|A2AF73_MOUSE	A2AF73	400	0.998	DEDQSSLYKLLETRFSPIARRRSSLAEDQAF	S	P	I	A	5	2	3	-0.503431	0.519624	1.4932	1.16713	0.81333	STYX	0.00809655	0.935816	1.15789	0.0118635	NR
A2AF73_497 498	tr|A2AF73|A2AF73_MOUSE	A2AF73	497 498	0.867	FTDQKPMEDNLHSILTSPSTRRTSVSDQRMF TDQKPMEDNLHSILTSPSTRRTSVSDQRMFY	T	S	P	S	5	2	3	0.0441794	-0.0853598	0.0362794	0.143544	0.735748	STYX	-0.0205902	0.936353	0.30519	0.438433	CENTER
A2AF73_520	tr|A2AF73|A2AF73_MOUSE	A2AF73	520	1	SVSDQRMFYEPIQIKSAPPIIKKTSFAEEKS	S	A	P	P	5	2	3	-0.326451	-0.0511223	0.537008	0.589883	1.14878	STYX	-0.188787	0.345334	0.758557	0.0525186	CENTER
A2AHM1_40	tr|A2AHM1|A2AHM1_MOUSE	A2AHM1	40	0.999	LQGAQPTGKEEGKAASPALDQGDGPSSSDRG	S	P	A	L	5	2	3	-0.725372	-0.222663	0.314154	0.437348	0.0492233	STYX	-0.474017	0.07814	0.266908	0.451327	CENTER
A2AK42_60 61 62	tr|A2AK42|A2AK42_MOUSE,tr|A2AK44|A2AK44_MOUSE,sp|Q8C5N3|CWC22_MOUSE	A2AK42	60 61 62	0.863	YSDYSRSDYERSRRGYSYDDSMESRSRDREK SDYSRSDYERSRRGYSYDDSMESRSRDREKR DYSRSDYERSRRGYSYDDSMESRSRDREKRR	Y	S	Y	D	5	2	3	0.111733	-0.0215048	-0.300871	-0.854995	-0.538998	STYX	0.0451141	0.761	-0.564955	0.0611006	CENTER
A2AMD0_171	tr|A2AMD0|A2AMD0_MOUSE,sp|Q05CL8|LARP7_MOUSE	A2AMD0	171	1	ASSLPEARAGKRERCSAEDEDCLPPRPKAKK	S	A	E	D	5	2	3	0.614978	0.176156	0.0723265	0.114193	0.159692	STYX	0.395567	0.133319	0.115404	0.797641	CENTER
A2ANY6_2908	tr|A2ANY6|A2ANY6_MOUSE	A2ANY6	2908	0.999	LSRGFLEKAHDASSPSQPDLSSLVHLTRRVQ	S	Q	P	D	4	2	2	-0.239267	0.392856	NA	-0.231445	0.0359424	STYQ	0.0767945	0.853336	-0.0977512	0.666735	CENTER
A2ANY6_4808	tr|A2ANY6|A2ANY6_MOUSE	A2ANY6	4808	1	PGVDEEDSELVAKDDSLDAGNLNKNKKHQDE	S	L	D	A	5	2	3	0.131956	-0.0100001	-0.695113	-0.340483	0.546946	STYX	0.0609777	0.696754	-0.162883	0.500562	CENTER
A2ANY6_4827	tr|A2ANY6|A2ANY6_MOUSE	A2ANY6	4827	1	GNLNKNKKHQDEKEDSEPEDVEQGQEKINEQ	S	E	P	E	5	2	3	0.619187	-0.0498822	-0.0934758	0.18495	0.475549	STYX	0.284653	0.374014	0.189008	0.641389	CENTER
A2ANY6_5235 5236 5237	tr|A2ANY6|A2ANY6_MOUSE	A2ANY6	5235 5236 5237	0.899	VDMQTLKTKEDQDPRTTTPHQETENERPERS DMQTLKTKEDQDPRTTTPHQETENERPERSR MQTLKTKEDQDPRTTTPHQETENERPERSRD	T	T	T	P	4	2	2	0.0592162	-0.186181	0.0705079	0.437529	NA	STYX	-0.0634826	0.746126	0.254018	0.569521	CENTER
A2ANY6_5237	tr|A2ANY6|A2ANY6_MOUSE	A2ANY6	5237	0.963	MQTLKTKEDQDPRTTTPHQETENERPERSRD	T	P	H	Q	4	2	2	0.0819146	-0.076053	0.425428	0.282951	NA	STYX	0.00293079	0.957588	0.354189	0.389423	CENTER
A2APZ1_63	tr|A2APZ1|A2APZ1_MOUSE	A2APZ1	63	0.998	GAWRRDRKSQRLPCGSPESPNARRDRGTARA	S	P	E	S	5	2	3	-0.524284	-0.093837	0.0185947	0.251987	-0.341583	STYX	-0.30906	0.190987	-0.0236669	0.806767	CENTER
A2APZ1_66	tr|A2APZ1|A2APZ1_MOUSE	A2APZ1	66	0.998	RRDRKSQRLPCGSPESPNARRDRGTARALLL	S	P	N	A	5	2	3	-0.397863	0.000950552	0.405211	0.393032	0.791655	STYX	-0.198456	0.367876	0.529966	0.135557	CENTER
A2ATK9_460	tr|A2ATK9|A2ATK9_MOUSE	A2ATK9	460	1	DNLTPSGTLGKDYHKSVEIFPLKARKSMEKE	S	V	E	I	5	2	3	-0.920406	-0.09965	-0.831373	-0.480791	-0.52992	STYX	-0.510028	0.142274	-0.614028	0.0426442	CENTER
A2ATY4_481	tr|A2ATY4|A2ATY4_MOUSE	A2ATY4	481	1	RKNHPGVTEGRGRMESPERTDMYVEQKLESD	S	P	E	R	5	2	3	0.394312	-0.22537	-0.147589	0.136366	0.208635	STYX	0.0844711	0.826501	0.065804	0.944773	CENTER
A2AUY4_1200	tr|A2AUY4|A2AUY4_MOUSE	A2AUY4	1200	0.996	ASGGIDLGEEQHPLGTPTPGRKRRRKGGDSD	T	P	T	P	5	2	3	-0.034562	-0.169857	-0.0722461	0.199538	-0.431804	STYX	-0.10221	0.578943	-0.101504	0.612938	CENTER
A2RT18_110	tr|A2RT18|A2RT18_MOUSE	A2RT18	110	0.998	SQFPKDSWSASRTINSDSESPVMSSDSMKYM	S	D	S	E	5	2	3	0.182359	0.0850234	0.249434	0.399691	0.132893	STYX	0.133691	0.438294	0.260673	0.454168	CENTER
A2RT18_255	tr|A2RT18|A2RT18_MOUSE	A2RT18	255	1	EGFQMDEEREGCLVESDFRDSEREAHLLEAH	S	D	F	R	5	2	3	0.0305977	-0.106132	-0.551711	0.0884731	0.180098	STYX	-0.0377673	0.85466	-0.09438	0.66861	CENTER
A2RT18_399	tr|A2RT18|A2RT18_MOUSE	A2RT18	399	0.998	EYRYPHSCESLKYQISPIPLSSETCTSNVSS	S	P	I	P	5	2	3	-0.148304	-0.0625359	0.355078	0.596958	0.732268	STYX	-0.10542	0.558409	0.561435	0.1137	CENTER
A2RT18_423	tr|A2RT18|A2RT18_MOUSE	A2RT18	423	0.986	CTSNVSSFVDSPTSKSPKSVTRKKSRRSITY	S	P	K	S	4	2	2	-0.848592	0.0063434	0.495067	NA	0.0495805	STYX	-0.421125	0.255098	0.272324	0.548028	CENTER
A2RT18_439	tr|A2RT18|A2RT18_MOUSE	A2RT18	439	0.997	PKSVTRKKSRRSITYSPEQGSQKCTRCFMEI	S	P	E	Q	5	2	3	-0.125183	-0.000972427	0.267633	0.45336	-0.121557	STYX	-0.0630775	0.735923	0.199812	0.612293	CENTER
A2RTS7_399 400	tr|A2RTS7|A2RTS7_MOUSE	A2RTS7	399 400	0.865	PGTLEKTLGRPKGGPSSPEVLPTAQEPLKGT GTLEKTLGRPKGGPSSPEVLPTAQEPLKGTN	S	S	P	E	5	2	3	0.393962	0.219496	0.570266	0.477181	0.616881	STYX	0.306729	0.157354	0.554776	0.110473	CENTER
A6X8I0_102	tr|A6X8I0|A6X8I0_MOUSE,tr|B1AZA0|B1AZA0_MOUSE,tr|B1B0R1|B1B0R1_MOUSE,tr|L7MUF1|L7MUF1_MOUSE,tr|Q497S0|Q497S0_MOUSE,tr|Q4KL04|Q4KL04_MOUSE,tr|Q4KL05|Q4KL05_MOUSE,tr|Q5M8P2|Q5M8P2_MOUSE,tr|Q62478|Q62478_MOUSE	A6X8I0	102	0.999	ENWNLLSGDQQVRNASELDLMEVQNPVTHDD	S	E	L	D	5	2	3	-0.170692	-0.341224	0.0125749	0.249878	0.724041	STYX	-0.255958	0.186294	0.328831	0.388446	CENTER
A6X8Z9_211	tr|A6X8Z9|A6X8Z9_MOUSE	A6X8Z9	211	0.999	QAGYRSYYKTLAHIESRTLTDTNDYRETGQR	S	R	T	L	4	2	2	-0.497356	-0.142587	0.534863	NA	0.67691	STYX	-0.319971	0.152037	0.605887	0.16207	CENTER
A6ZI46_101	tr|A6ZI46|A6ZI46_MOUSE,tr|A6ZI47|A6ZI47_MOUSE,sp|P05064|ALDOA_MOUSE	A6ZI46	101	0.996	LAADESIGSMGNRLQSIGTENTEENRRFFRQ	S	I	G	T	5	2	3	0.0317188	-0.384716	-0.668068	-0.739313	-0.807744	STYX	-0.176499	0.429763	-0.738375	0.0221793	CENTER
A6ZI47_36	tr|A6ZI47|A6ZI47_MOUSE,sp|P05064|ALDOA_MOUSE	A6ZI47	36	0.988	RRIVAPGKGILAADESTGSIAKRLQSIGTEN	S	T	G	S	5	2	3	-0.474117	0.300862	-1.20652	-0.735045	-0.913361	STYX	-0.0866274	0.773205	-0.951641	0.011034	NR
A6ZI47_39	tr|A6ZI47|A6ZI47_MOUSE,sp|P05064|ALDOA_MOUSE	A6ZI47	39	0.997	VAPGKGILAADESTGSIAKRLQSIGTENTEE	S	I	A	K	5	2	3	-0.291072	0.103281	-0.832708	-0.630455	-0.658049	STYX	-0.0938957	0.663108	-0.707071	0.0260332	CENTER
A7L3B_92	sp|Q3UD01|A7L3B_MOUSE	Q3UD01	92	0.999	LPGDPGDGPQTELQRSPPEFQ__________	S	P	P	E	5	2	3	-0.301676	0.180357	0.0451141	-0.191179	0.682228	STYX	-0.0606597	0.784774	0.178721	0.734944	CENTER
A7UAK5_490	tr|A7UAK5|A7UAK5_MOUSE	A7UAK5	490	0.999	KQDAKKGPNPLMRRNSVTPLASPEPTKKPRI	S	V	T	P	5	2	3	-0.253459	-0.0544104	-1.04153	-1.13278	-0.676297	STYX	-0.153935	0.412417	-0.9502	0.0112301	NR
A8DUK4_50 51	tr|A8DUK4|A8DUK4_MOUSE,sp|P02088|HBB1_MOUSE	A8DUK4	50 51	0.873	VYPWTQRYFDSFGDLSSASAIMGNAKVKAHG YPWTQRYFDSFGDLSSASAIMGNAKVKAHGK	S	S	A	S	5	2	3	-0.0926682	-0.673724	0.165616	-0.0124276	-0.0035779	STYX	-0.383196	0.164786	0.04987	0.987262	CENTER
A8DUK4_53	tr|A8DUK4|A8DUK4_MOUSE,sp|P02088|HBB1_MOUSE	A8DUK4	53	0.998	WTQRYFDSFGDLSSASAIMGNAKVKAHGKKV	S	A	I	M	5	2	3	-0.509402	-0.895004	0.193741	-0.0239118	-0.0869223	STYX	-0.702203	0.0263654	0.0276356	0.944304	CENTER
A8DUK4_81	tr|A8DUK4|A8DUK4_MOUSE,sp|P02088|HBB1_MOUSE	A8DUK4	81	0.999	KKVITAFNDGLNHLDSLKGTFASLSELHCDK	S	L	K	G	5	2	3	0.0397793	-0.626742	-0.294376	-0.0751601	0.969321	STYX	-0.293481	0.333781	0.199928	0.814647	CENTER
A8DUK4_88	tr|A8DUK4|A8DUK4_MOUSE,sp|P02088|HBB1_MOUSE,sp|P02089|HBB2_MOUSE	A8DUK4	88	0.984	NDGLNHLDSLKGTFASLSELHCDKLHVDPEN	S	L	S	E	4	2	2	-0.72445	-0.469408	-0.165899	-0.111494	NA	STYX	-0.596929	0.0315202	-0.138697	0.578713	CENTER
AAAS_495	sp|P58742|AAAS_MOUSE	P58742	495	1	THIPLYFVNAQFPRFSPVLGRAQEPPAGGGG	S	P	V	L	5	2	3	0.049937	-0.00287367	-0.328648	-0.110055	0.764535	STYX	0.0235317	0.852188	0.10861	0.965613	CENTER
AAK1_18	sp|Q3UHJ0|AAK1_MOUSE	Q3UHJ0	18	0.976	KFFDSRREQGSSGLGSGSSGGGGSSSGLGSG	S	G	S	S	4	2	2	-0.291075	0.323677	0.114805	0.0690675	NA	STYX	0.0163011	0.994298	0.0919362	0.889159	CENTER
AAK1_20 21	sp|Q3UHJ0|AAK1_MOUSE	Q3UHJ0	20 21	0.884	FDSRREQGSSGLGSGSSGGGGSSSGLGSGYI DSRREQGSSGLGSGSSGGGGSSSGLGSGYIG	S	S	G	G	4	2	2	-0.0894755	0.0572811	-0.271658	-0.17317	NA	STYX	-0.0160972	0.95454	-0.222414	0.422947	CENTER
AAK1_21	sp|Q3UHJ0|AAK1_MOUSE	Q3UHJ0	21	0.998	DSRREQGSSGLGSGSSGGGGSSSGLGSGYIG	S	G	G	G	4	2	2	-0.346745	0.0147947	0.0747204	-0.134435	NA	STYX	-0.165975	0.434049	-0.0298572	0.819377	CENTER
AAK1_603 604	sp|Q3UHJ0|AAK1_MOUSE	Q3UHJ0	603 604	0.898	PGQIQAPVRQQPKVQTTPPPTIQGQKVGSLT GQIQAPVRQQPKVQTTPPPTIQGQKVGSLTP	T	T	P	P	5	2	3	0.473127	-0.0063546	-0.244686	-0.277302	-0.433556	STYX	0.233386	0.359849	-0.318515	0.195641	CENTER
AAK1_604	sp|Q3UHJ0|AAK1_MOUSE	Q3UHJ0	604	0.994	GQIQAPVRQQPKVQTTPPPTIQGQKVGSLTP	T	P	P	P	5	2	3	-0.225495	0.0565259	-0.148087	-0.163324	-0.24448	STYX	-0.0844848	0.669409	-0.185297	0.39508	CENTER
AAK1_618	sp|Q3UHJ0|AAK1_MOUSE	Q3UHJ0	618	0.998	TTPPPTIQGQKVGSLTPPSSPKTQRAGHRRI	T	P	P	S	5	2	3	-0.297344	0.374032	0.039345	0.133312	-0.0371252	STYX	0.0383442	0.96001	0.0451771	0.997829	CENTER
AAK1_618 621 622	sp|Q3UHJ0|AAK1_MOUSE	Q3UHJ0	618 621 622	0.899	TTPPPTIQGQKVGSLTPPSSPKTQRAGHRRI PPTIQGQKVGSLTPPSSPKTQRAGHRRILSD PTIQGQKVGSLTPPSSPKTQRAGHRRILSDV	T	P	P	S	5	2	3	0.0473098	-0.139241	-0.166384	-0.304371	-0.134047	STYX	-0.0459658	0.816608	-0.2016	0.366617	CENTER
AAK1_638	sp|Q3UHJ0|AAK1_MOUSE	Q3UHJ0	638	0.916	PKTQRAGHRRILSDVTHSAVFGVPASKSTQL	T	H	S	A	5	2	3	-0.310134	-0.121086	-0.634409	-0.883622	-0.536654	STYX	-0.21561	0.25755	-0.684895	0.0301076	CENTER
AAK1_650	sp|Q3UHJ0|AAK1_MOUSE	Q3UHJ0	650	0.978	SDVTHSAVFGVPASKSTQLLQAAAAEASLNK	S	T	Q	L	4	2	2	-0.55874	0.0133615	-0.300537	NA	-0.215545	STYX	-0.27269	0.314996	-0.258041	0.365938	CENTER
AAK1_650 651	sp|Q3UHJ0|AAK1_MOUSE	Q3UHJ0	650 651	0.855	SDVTHSAVFGVPASKSTQLLQAAAAEASLNK DVTHSAVFGVPASKSTQLLQAAAAEASLNKS	S	T	Q	L	4	2	2	-0.21566	0.00425065	-0.153574	-0.458405	NA	STYX	-0.105705	0.577635	-0.30599	0.31646	CENTER
AAK1_668	sp|Q3UHJ0|AAK1_MOUSE	Q3UHJ0	668	0.991	LLQAAAAEASLNKSKSATTTPSGSPRTSQQN	S	A	T	T	5	2	3	0.290787	0.269169	0.440216	0.575723	0.406893	STYX	0.279978	0.169909	0.474277	0.165089	CENTER
AAK1_670 671 672 676	sp|Q3UHJ0|AAK1_MOUSE	Q3UHJ0	670 671 672 676	0.878	QAAAAEASLNKSKSATTTPSGSPRTSQQNVS AAAAEASLNKSKSATTTPSGSPRTSQQNVSN AAAEASLNKSKSATTTPSGSPRTSQQNVSNA ASLNKSKSATTTPSGSPRTSQQNVSNASEGS	T	T	T	P	4	2	2	0.26234	0.161075	-0.0981387	-0.525872	NA	STYX	0.211707	0.265004	-0.312005	0.325505	CENTER
AAK1_676	sp|Q3UHJ0|AAK1_MOUSE	Q3UHJ0	676	0.998	ASLNKSKSATTTPSGSPRTSQQNVSNASEGS	S	P	R	T	5	2	3	0.0405153	0.0893007	-0.297133	-0.245588	-0.281739	STYX	0.064908	0.669901	-0.27482	0.244909	CENTER
AAKB1_108	sp|Q9R078|AAKB1_MOUSE	Q9R078	108	0.999	LSGSFNNWSKLPLTRSQNNFVAILDLPEGEH	S	Q	N	N	5	2	3	-0.952561	0.350948	0.1505	-0.227378	-0.0360318	STYQ	-0.300807	0.683071	-0.0376367	0.756684	CENTER
AAKB2_181 182 183	sp|Q6PAM0|AAKB2_MOUSE	Q6PAM0	181 182 183	0.889	KLDSMESSETSCRDLSSSPPGPYGQEMYVFR LDSMESSETSCRDLSSSPPGPYGQEMYVFRS DSMESSETSCRDLSSSPPGPYGQEMYVFRSE	S	S	S	P	5	2	3	0.0380951	-0.00831364	0.286529	0.680154	0.389243	STYX	0.0148908	0.891007	0.451975	0.193274	CENTER
AAKB2_183	sp|Q6PAM0|AAKB2_MOUSE	Q6PAM0	183	0.995	DSMESSETSCRDLSSSPPGPYGQEMYVFRSE	S	P	P	G	5	2	3	-0.452589	0.249835	0.398022	0.643487	0.692973	STYX	-0.101377	0.727287	0.578161	0.102017	CENTER
AAKB2_38	sp|Q6PAM0|AAKB2_MOUSE	Q6PAM0	38	0.99	GGGHGPGKEHKIMVGSTDDPSVFSLPDSKLP	S	T	D	D	4	2	2	-0.279948	0.0555863	NA	0.67637	1.27082	STYX	-0.112181	0.583571	0.973596	0.0626397	NR
AAKG2_113	sp|Q91WG5|AAKG2_MOUSE	Q91WG5	113	0.999	SPGSPKTVFPFSYQESPPRSPRRMSFSGIFR	S	P	P	R	5	2	3	-0.154665	0.215296	0.448447	0.332189	0.470437	STYX	0.0303158	0.897416	0.417024	0.215591	CENTER
AAKG2_122	sp|Q91WG5|AAKG2_MOUSE	Q91WG5	122	0.995	PFSYQESPPRSPRRMSFSGIFRSSSKESSPN	S	F	S	G	4	2	2	-0.586573	0.213463	0.630536	NA	0.262967	STYX	-0.186555	0.603743	0.446751	0.295855	CENTER
AAKG2_143	sp|Q91WG5|AAKG2_MOUSE	Q91WG5	143	0.994	RSSSKESSPNSNPSTSPGGIRFFSRSRKTSS	S	P	G	G	5	2	3	-0.0733724	0.183352	0.372374	0.503392	-0.181361	STYX	0.0549899	0.760143	0.231469	0.558619	CENTER
AAKG2_16	sp|Q91WG5|AAKG2_MOUSE	Q91WG5	16	0.997	MGSAAMDTKKKKEVSSPGGSSGKKNPSLKRR	S	P	G	G	5	2	3	0.936014	-0.284168	1.78286	1.32848	1.91798	STYX	0.325923	0.706016	1.67644	0.00441472	NR
AAKG2_196	sp|Q91WG5|AAKG2_MOUSE	Q91WG5	196	0.993	KQEPERPESRIYASSSPPDTGQRFCLAFQSP	S	P	P	D	5	2	3	0.097353	0.522517	0.442457	0.605625	1.1118	STYX	0.309935	0.209972	0.71996	0.0632882	CENTER
AAMDC_46	sp|Q8R0P4|AAMDC_MOUSE	Q8R0P4	46	0.999	GGSRAWDWRETGTEHSPGVQPADVKEVAEKG	S	P	G	V	5	2	3	0.0553414	0.0661049	0.536198	0.572366	0.207194	STYX	0.0607231	0.687372	0.438586	0.208698	CENTER
AAPK1_183	sp|Q5EG47|AAPK1_MOUSE,sp|Q8BRK8|AAPK2_MOUSE	Q5EG47	183	0.991	DFGLSNMMSDGEFLRTSCGSPNYAAPEVISG	T	S	C	G	5	2	3	-0.868066	-0.554825	-0.188549	-0.337073	-0.402412	STYX	-0.711445	0.0245818	-0.309345	0.206192	CENTER
AAPK1_187	sp|Q5EG47|AAPK1_MOUSE,sp|Q8BRK8|AAPK2_MOUSE	Q5EG47	187	0.981	SNMMSDGEFLRTSCGSPNYAAPEVISGRLYA	S	P	N	Y	5	2	3	-0.132418	-0.372894	0.00225405	-0.788175	-0.366101	STYX	-0.252656	0.205384	-0.384007	0.185122	CENTER
AAPK1_496	sp|Q5EG47|AAPK1_MOUSE	Q5EG47	496	0.963	ITEAKSGTATPQRSGSISNYRSCQRSDSDAE	S	I	S	N	5	2	3	-0.0712389	0.0758311	-1.14145	-1.20512	-1.17481	STYX	0.00229608	0.958934	-1.17379	0.00549065	NR
AAPK2_491	sp|Q8BRK8|AAPK2_MOUSE	Q8BRK8	491	0.995	VVEQRSGSSTPQRSCSAAGLHRARSSFDSST	S	A	A	G	5	2	3	0.0761121	0.28073	-0.170952	0.0066791	0.239042	STYX	0.178421	0.350653	0.024923	0.936061	CENTER
AB17A_302	sp|Q99JW1|AB17A_MOUSE	Q99JW1	302	0.999	IELYSQYLERLRRFISQELPSQRA_______	S	Q	E	L	4	2	2	-0.444738	-0.0307484	NA	0.282192	0.165383	STYQ	-0.237743	0.298591	0.223788	0.600204	CENTER
AB17B_282	sp|Q7M759|AB17B_MOUSE	Q7M759	282	1	VELYGQYLERLKQFVSQELVNL_________	S	Q	E	L	5	2	3	0.103883	0.174497	0.0688387	0.816721	0.767066	STYQ	0.13919	0.418541	0.550875	0.152852	CENTER
AB1IP_507	sp|Q8R5A3|AB1IP_MOUSE	Q8R5A3	507	0.998	QIETTKDEKQGLGNHSPGATRENHRPKSSLP	S	P	G	A	5	2	3	-0.319344	0.181507	-0.589099	-0.357088	-0.29627	STYX	-0.0689188	0.763145	-0.414152	0.118866	CENTER
ABCAH_1697	sp|E9PX95|ABCAH_MOUSE	E9PX95	1697	0.995	SSTKEQIQQEQAVLASPSPPSNSRPISSPPS	S	P	S	P	4	2	2	0.0816962	-0.111238	0.279113	0.0918494	NA	STYX	-0.0147711	0.958934	0.185481	0.681397	CENTER
ABCF1_107	sp|Q6P542|ABCF1_MOUSE	Q6P542	107	0.999	ERVLMERLKQLSVPASDEEDEVPAPIPRGRK	S	D	E	E	5	2	3	-0.0577902	-0.0948606	-0.0614256	-0.0828501	-0.139583	STYX	-0.0763254	0.680429	-0.0946196	0.603853	CENTER
ABCF1_194	sp|Q6P542|ABCF1_MOUSE	Q6P542	194	0.999	EKSKGKAKSKPAAADSEGEEEEEDTAKEKEP	S	E	G	E	5	2	3	0.330183	-0.0119021	-0.216366	0.00477042	-0.235083	STYX	0.15914	0.455235	-0.148893	0.473569	CENTER
ABCF1_90	sp|Q6P542|ABCF1_MOUSE	Q6P542	90	1	RDTRKGRRKKDVDDDSDERVLMERLKQLSVP	S	D	E	R	5	2	3	0.438023	-0.0260542	-0.17019	-0.183999	0.19674	STYX	0.205985	0.407238	-0.0524829	0.715518	CENTER
ABCF3_543	sp|Q8K268|ABCF3_MOUSE	Q8K268	543	1	GAGKSTMLKLLMGDLSPVRGIRHAHRNLKIG	S	P	V	R	5	2	3	-0.473453	0.0375497	0.173143	0.195192	0.0623327	STYX	-0.217952	0.384816	0.143556	0.720762	CENTER
ABHD2_415	sp|Q9QXM0|ABHD2_MOUSE	Q9QXM0	415	0.972	YANAICQWERNKSQCSDTEQMEAELE_____	S	D	T	E	5	2	3	-0.377207	-0.284979	0.0254592	-0.125552	-0.508582	STYX	-0.331093	0.101281	-0.202892	0.396211	CENTER
ABI1_183	sp|Q8CBW3|ABI1_MOUSE	Q8CBW3	183	0.999	TGTLSRTNPPTQKPPSPPVSGRGTLGRNTPY	S	P	P	V	5	2	3	-0.0942389	0.315868	-0.933827	-1.08937	-1.09634	STYX	0.110814	0.634854	-1.03985	0.00769695	NR
ABI1_225	sp|Q8CBW3|ABI1_MOUSE	Q8CBW3	225	0.998	PNDYMTSPARLGSQHSPGRTASLNQRPRTHS	S	P	G	R	5	2	3	-0.157469	0.255249	0.0699968	0.178387	-0.456115	STYX	0.0488903	0.847425	-0.0692438	0.705945	CENTER
ABI1_231	sp|Q8CBW3|ABI1_MOUSE	Q8CBW3	231	0.997	SPARLGSQHSPGRTASLNQRPRTHSGSSGGS	S	L	N	Q	5	2	3	-0.256794	-0.131327	-1.34768	-1.62795	-0.631067	STYX	-0.19406	0.287127	-1.20223	0.00840593	NR
ABI1_285 286 287 288 289 290 291 303	sp|Q8CBW3|ABI1_MOUSE	Q8CBW3	285 286 287 288 289 290 291 303	0.892	TAGPAAPGAAPGSQYGTMTRQISRHNSTTSS AGPAAPGAAPGSQYGTMTRQISRHNSTTSST GPAAPGAAPGSQYGTMTRQISRHNSTTSSTS PAAPGAAPGSQYGTMTRQISRHNSTTSSTSS AAPGAAPGSQYGTMTRQISRHNSTTSSTSSG APGAAPGSQYGTMTRQISRHNSTTSSTSSGG PGAAPGSQYGTMTRQISRHNSTTSSTSSGGY TRQISRHNSTTSSTSSGGYRRTPSVAAQFSA	G	T	M	T	5	2	3	-0.210618	0.76674	-0.0589046	0.542304	-0.282794	STYX	0.278061	0.623028	0.0668683	0.996155	CENTER
ABI1_296	sp|Q8CBW3|ABI1_MOUSE	Q8CBW3	296	0.996	GSQYGTMTRQISRHNSTTSSTSSGGYRRTPS	S	T	T	S	5	2	3	-0.988997	1.30433	-1.56069	-0.693518	-0.693384	STYX	0.157666	0.977418	-0.982532	0.0141346	NR
ABI2_177	sp|P62484|ABI2_MOUSE	P62484	177	0.999	MGGLPRTTPPTQKPPSPPMSGKGTLGRHSPY	S	P	P	M	5	2	3	-0.0794423	0.290294	-0.636358	-0.76101	-0.69918	STYX	0.105426	0.62821	-0.698849	0.0262361	CENTER
ABI2_190	sp|P62484|ABI2_MOUSE	P62484	190	0.982	PPSPPMSGKGTLGRHSPYRTLEPVRPPVVPN	S	P	Y	R	5	2	3	-0.00181207	0.905058	-0.196179	0.00873661	-0.525424	STYX	0.451623	0.259685	-0.237622	0.333043	CENTER
ABI2_221	sp|P62484|ABI2_MOUSE	P62484	221	0.998	DYVPSPTRNMAPSQQSPVRTASVNQRNRTYS	S	P	V	R	5	2	3	-0.0594602	-0.0220389	-0.323563	-0.197923	-0.283842	STYX	-0.0407495	0.848836	-0.268443	0.254483	CENTER
ABI2_301	sp|P62484|ABI2_MOUSE	P62484	301	0.997	MNRPASRHTPPTIGGSLPYRRPPSITSQTSL	S	L	P	Y	5	2	3	-0.456538	-0.0483638	-0.547871	-0.634393	-0.160099	STYX	-0.252451	0.268639	-0.447454	0.110107	CENTER
ABL1_547	sp|P00520|ABL1_MOUSE	P00520	547	0.999	TRTCRRAAEQKDAPDTPELLHTKGLGESDAL	T	P	E	L	5	2	3	-0.173106	-0.0387546	0.109047	0.543061	1.06614	STYX	-0.10593	0.563871	0.572749	0.152175	CENTER
ABL1_569	sp|P00520|ABL1_MOUSE	P00520	569	0.999	KGLGESDALDSEPAVSPLLPRKERGPPDGSL	S	P	L	L	5	2	3	-0.345398	0.0575466	-0.536136	-0.47309	-0.287004	STYX	-0.143926	0.513201	-0.432077	0.10557	CENTER
ABL1_658	sp|P00520|ABL1_MOUSE	P00520	658	0.995	NGPPALTSDAAEPTKSPKASNGAGVPNGAFR	S	P	K	A	4	2	2	0.309598	-0.0735908	-0.0802106	-0.0377351	NA	STYX	0.118004	0.599198	-0.0589728	0.751729	CENTER
ABL1_717	sp|P00520|ABL1_MOUSE	P00520	717	0.991	EESGMSSSKRFLRSCSASCMPHGARDTEWRS	S	A	S	C	5	2	3	-0.152728	0.535332	-0.184522	-1.3058	-0.895077	STYX	0.191302	0.600137	-0.795132	0.03841	CENTER
ABL2_621	sp|Q4JIM5|ABL2_MOUSE	Q4JIM5	621	0.998	SAPAGFIRSTQASSGSPALPRKQRDKSPSSL	S	P	A	L	5	2	3	0.00335323	0.231382	-0.0915103	0.272021	-0.22959	STYX	0.117368	0.526267	-0.0163597	0.813018	CENTER
ABL2_632	sp|Q4JIM5|ABL2_MOUSE	Q4JIM5	632	0.996	ASSGSPALPRKQRDKSPSSLLEDAKETCFTR	S	P	S	S	5	2	3	-0.18216	0.211861	-0.61255	-0.382773	-0.540789	STYX	0.0148506	0.958306	-0.512037	0.0678773	CENTER
ABL2_822	sp|Q4JIM5|ABL2_MOUSE	Q4JIM5	822	0.998	CQRSKLQLERTVSTSSQPEENVDRANDMLPK	S	Q	P	E	5	2	3	-0.135034	-0.308939	-0.988991	-1.51832	-1.03522	STYQ	-0.221986	0.240818	-1.18084	0.00623101	NR
ABL2_936	sp|Q4JIM5|ABL2_MOUSE	Q4JIM5	936	0.997	AVLPTTHNHKVPVLISPTLKHTPADVQLIGT	S	P	T	L	5	2	3	0.170302	0.719751	0.237621	0.00868731	0.155353	STYX	0.445027	0.125389	0.133887	0.748321	CENTER
ABLM1_475	sp|Q8K4G5|ABLM1_MOUSE	Q8K4G5	475	0.99	DKQERQSLGESPRTLSPTPSAEGYQDVRDRM	S	P	T	P	5	2	3	-0.233956	-0.0231061	-0.681879	-0.79528	-0.908475	STYX	-0.128531	0.496949	-0.795211	0.0178974	CENTER
ABLM1_496	sp|Q8K4G5|ABLM1_MOUSE	Q8K4G5	496	0.996	EGYQDVRDRMIHRSTSQGSINSPVYSRHSYT	S	Q	G	S	5	2	3	-0.0204334	-0.0720199	-0.630013	-0.852289	-0.614852	STYQ	-0.0462266	0.816958	-0.699051	0.0272937	CENTER
ABLM1_670	sp|Q8K4G5|ABLM1_MOUSE	Q8K4G5	670	0.994	GPPSLAAVGTDPRRRSSGREEDEEELLRRRQ	S	S	G	R	5	2	3	-0.181538	-0.140181	-0.903297	-0.680768	-0.653178	STYX	-0.16086	0.362749	-0.745748	0.0221831	CENTER
ABLM1_670 671	sp|Q8K4G5|ABLM1_MOUSE	Q8K4G5	670 671	0.89	GPPSLAAVGTDPRRRSSGREEDEEELLRRRQ PPSLAAVGTDPRRRSSGREEDEEELLRRRQL	S	S	G	R	5	2	3	-0.378257	0.00146198	-0.756271	-0.392265	-0.598024	STYX	-0.188398	0.383033	-0.582187	0.0495335	CENTER
ABR_72	sp|Q5SSL4|ABR_MOUSE	Q5SSL4	72	0.903	SPQLSARSQGGGDSVSPTPPEGLAPGVEAGK	S	P	T	P	5	2	3	-0.205813	-0.157538	-0.000599827	-0.266647	-0.205147	STYX	-0.181675	0.308055	-0.157465	0.455751	CENTER
ABRX1_331	sp|Q8BPZ8|ABRX1_MOUSE	Q8BPZ8	331	0.99	VDVVDQLTLMVEYVYSPEASPVPTAQLRKRK	S	P	E	A	5	2	3	0.0452401	-0.172467	0.0962775	0.217495	1.17437	STYX	-0.0636135	0.742805	0.496046	0.254948	CENTER
ABRX2_280	sp|Q3TCJ1|ABRX2_MOUSE	Q3TCJ1	280	0.994	LLSRQMPSESLEPAFSPRMSYSGFSAEGRST	S	P	R	M	5	2	3	-0.310394	-0.0223653	0.179695	0.000728983	0.473641	STYX	-0.16638	0.406983	0.218022	0.565296	CENTER
ABTB2_364 365	sp|Q7TQI7|ABTB2_MOUSE	Q7TQI7	364 365	0.866	RAMHHMQGRHPLCPGTSPARQARQPPQPITW AMHHMQGRHPLCPGTSPARQARQPPQPITWS	T	S	P	A	5	2	3	-0.238611	-0.122636	-0.161819	3.89e-05	-0.797479	STYX	-0.180623	0.319079	-0.319753	0.269911	CENTER
ABTB2_67	sp|Q7TQI7|ABTB2_MOUSE	Q7TQI7	67	0.996	AAWWCYSGSMNSRHNSWDTVNTVLPEDPEVA	S	W	D	T	5	2	3	-0.867125	-0.0836875	-0.151006	-0.546067	-0.294061	STYX	-0.475407	0.157652	-0.330378	0.195641	CENTER
ACACA_29	sp|Q5SWU9|ACACA_MOUSE	Q5SWU9	29	0.999	NQHSRFIIGSVSEDNSEDEISNLVKLDLEEK	S	E	D	E	5	2	3	-0.403531	-0.192292	-0.0408858	-0.979506	-0.241784	STYX	-0.297911	0.142458	-0.420725	0.183669	CENTER
ACACA_49	sp|Q5SWU9|ACACA_MOUSE	Q5SWU9	49	0.996	SNLVKLDLEEKEGSLSPASVSSDTLSDLGIS	S	P	A	S	5	2	3	-0.362685	-0.0398686	-0.173744	-0.295812	0.0916523	STYX	-0.201277	0.333556	-0.125968	0.533077	CENTER
ACACA_79	sp|Q5SWU9|ACACA_MOUSE	Q5SWU9	79	0.998	SGLQDGLAFHMRSSMSGLHLVKQGRDRKKID	S	G	L	H	5	2	3	-0.307981	0.289858	-0.345012	-0.664258	-0.612766	STYX	-0.0090615	0.933131	-0.540679	0.0610735	CENTER
ACACB_136	sp|E9Q4Z2|ACACB_MOUSE	E9Q4Z2	136	0.993	NGLSFPARPPSQRTVSPSREDRKQAHIKRQL	S	P	S	R	5	2	3	0.247796	-0.384439	0.47573	0.360113	-0.244558	STYX	-0.0683216	0.781574	0.197095	0.636094	CENTER
ACAD9_478	sp|Q8JZN5|ACAD9_MOUSE	Q8JZN5	478	1	NVTTVMETIGRKLRDSLGRTVDLGLTGDLGV	S	L	G	R	5	2	3	-0.441133	-0.272299	-0.131153	-0.359169	-0.312093	STYX	-0.356716	0.0905981	-0.267472	0.260323	CENTER
ACADL_54 55	sp|P51174|ACADL_MOUSE	P51174	54 55	0.899	PSAKKLTDVGIRRIFSSEHDIFRESVRKFFQ SAKKLTDVGIRRIFSSEHDIFRESVRKFFQE	S	S	E	H	5	2	3	-0.00809176	0.157698	-0.919245	-0.0942925	-0.216174	STYX	0.0748031	0.65147	-0.409904	0.179171	CENTER
ACAP2_378 379	sp|Q6ZQK5|ACAP2_MOUSE	Q6ZQK5	378 379	0.892	AYREKGDESEKLDKKSSPSTGSLDSGNESKE YREKGDESEKLDKKSSPSTGSLDSGNESKEK	S	S	P	S	5	2	3	0.0815358	-0.0369292	-0.194372	0.400002	-0.395834	STYX	0.0223033	0.858813	-0.0634011	0.680153	CENTER
ACAP2_384	sp|Q6ZQK5|ACAP2_MOUSE	Q6ZQK5	384	0.994	DESEKLDKKSSPSTGSLDSGNESKEKLLKGE	S	L	D	S	5	2	3	0.364565	0.250458	-0.547894	-0.478508	-0.822486	STYX	0.307512	0.150594	-0.616296	0.0417474	CENTER
ACATN_42	sp|Q99J27|ACATN_MOUSE	Q99J27	42	1	SGPLPPGGWDDSRRDSVGGEGDREVLLGDAG	S	V	G	G	5	2	3	0.483306	-0.393429	-1.36319	-0.821183	-0.0312379	STYX	0.0449386	0.999775	-0.738538	0.0634375	CENTER
ACBD5_395	sp|Q5XG73|ACBD5_MOUSE	Q5XG73	395	1	FSSVRRGRGNRIPHLSEGPKGRQVGSGGDGE	S	E	G	P	5	2	3	0.0121033	-0.17676	-0.492139	-0.582784	-0.401515	STYX	-0.0823286	0.662128	-0.492146	0.0735666	CENTER
ACBD5_418	sp|Q5XG73|ACBD5_MOUSE	Q5XG73	418	0.998	VGSGGDGERWGSDRGSRGSLNEQIALVLIRL	S	R	G	S	5	2	3	0.25928	0.0216078	-0.941506	-0.619439	0.0416857	STYX	0.140444	0.4611	-0.50642	0.120503	CENTER
ACBG1_53	sp|Q99PU5|ACBG1_MOUSE	Q99PU5	53	0.962	SQTSSLIDGQTLSKESPSHGLELSAPEKARA	S	P	S	H	5	2	3	-0.107369	-0.498841	-0.701633	-0.306018	-0.0773476	STYX	-0.303105	0.184463	-0.361666	0.187679	CENTER
ACBG1_55	sp|Q99PU5|ACBG1_MOUSE	Q99PU5	55	0.92	TSSLIDGQTLSKESPSHGLELSAPEKARAAS	S	H	G	L	5	2	3	-0.477966	-0.454632	-0.569194	-0.305852	-0.171448	STYX	-0.466299	0.0461645	-0.348832	0.178218	CENTER
ACBG1_70	sp|Q99PU5|ACBG1_MOUSE	Q99PU5	70	1	SHGLELSAPEKARAASLDGAEEALWTTRADG	S	L	D	G	5	2	3	-0.449508	0.0145627	-0.581808	-0.729531	-0.44971	STYX	-0.217473	0.360558	-0.587017	0.0462883	CENTER
ACBG1_703	sp|Q99PU5|ACBG1_MOUSE	Q99PU5	703	1	ISGGELGPTMKLKRLTVLEKYKDIIDSFYQE	T	V	L	E	5	2	3	-0.329569	-0.313874	-0.570058	-0.88005	-0.7263	STYX	-0.321721	0.105864	-0.725469	0.0247098	CENTER
ACBG2_575	sp|Q2XU92|ACBG2_MOUSE	Q2XU92	575	0.999	KCETDRKSGEPLNKLSVEAKSFCQMLGSQAT	S	V	E	A	5	2	3	-0.477686	-0.282593	-0.285889	-0.64651	-1.23605	STYX	-0.38014	0.0805289	-0.722817	0.0406762	CENTER
ACD_25	sp|Q5EE38|ACD_MOUSE	Q5EE38	25	0.994	QPWIRELILGSETLSSPRTGQLLKVLQDSET	S	P	R	T	5	2	3	0.151243	0.294795	0.383408	0.0335629	0.449328	STYX	0.223019	0.251312	0.288766	0.416781	CENTER
ACD_298	sp|Q5EE38|ACD_MOUSE	Q5EE38	298	0.997	PPAVGSTSPRAQAPTSPPCNSTPSSLLLNCS	S	P	P	C	4	2	2	-0.069651	-0.144281	NA	-0.166096	0.102605	STYX	-0.106966	0.547865	-0.0317454	0.817131	CENTER
ACE_1305	sp|P09470|ACE_MOUSE	P09470	1305	1	NHHSLRRPHRGPQFGSEVELRHS________	S	E	V	E	5	2	3	-0.233134	-0.0864252	-0.160163	-0.196933	0.0982281	STYX	-0.15978	0.38199	-0.086289	0.627141	CENTER
ACINU_1003	sp|Q9JIX8|ACINU_MOUSE	Q9JIX8	1003	0.999	VSITIDDPVRTAQVPSPPRGKISNIVHISNL	S	P	P	R	5	2	3	0.3016	0.371306	0.0877134	0.0772493	-0.628337	STYX	0.336453	0.125889	-0.154458	0.544598	CENTER
ACINU_216	sp|Q9JIX8|ACINU_MOUSE	Q9JIX8	216	1	HSPRKSSSFSEEKGESDDEKPRKGERRSSRV	S	D	D	E	5	2	3	0.751746	0.0701846	0.249737	0.361075	0.0519828	STYX	0.410965	0.195222	0.220932	0.539905	CENTER
ACINU_389	sp|Q9JIX8|ACINU_MOUSE	Q9JIX8	389	0.988	ENEVKSSQSLEEKSQSPSPPPLPEDLEKAPV	S	P	S	P	5	2	3	0.16969	-0.106671	0.312464	0.39091	0.609066	STYX	0.0315093	0.860404	0.43748	0.201294	CENTER
ACINU_391	sp|Q9JIX8|ACINU_MOUSE	Q9JIX8	391	0.998	EVKSSQSLEEKSQSPSPPPLPEDLEKAPVVL	S	P	P	P	5	2	3	0.453121	0.475648	0.174931	0.356167	0.574648	STYX	0.464384	0.0708068	0.368582	0.288968	CENTER
ACINU_413	sp|Q9JIX8|ACINU_MOUSE	Q9JIX8	413	0.999	DLEKAPVVLQPEQIVSEEETPPPLLTKEASS	S	E	E	E	5	2	3	-0.109944	0.304143	0.334711	0.259056	1.05094	STYX	0.0970995	0.680429	0.548237	0.156711	CENTER
ACINU_417	sp|Q9JIX8|ACINU_MOUSE	Q9JIX8	417	0.999	APVVLQPEQIVSEEETPPPLLTKEASSPPTH	T	P	P	P	5	2	3	-0.70738	0.129927	0.359936	0.0762746	0.599755	STYX	-0.288727	0.45198	0.345322	0.334584	CENTER
ACINU_427 428	sp|Q9JIX8|ACINU_MOUSE	Q9JIX8	427 428	0.88	VSEEETPPPLLTKEASSPPTHIQLQEEMEPV SEEETPPPLLTKEASSPPTHIQLQEEMEPVE	S	S	P	P	5	2	3	-0.00301012	-0.045862	0.259131	0.07711	0.3995	STYX	-0.0244361	0.922756	0.245247	0.488095	CENTER
ACINU_431	sp|Q9JIX8|ACINU_MOUSE	Q9JIX8	431	0.957	ETPPPLLTKEASSPPTHIQLQEEMEPVEGPA	T	H	I	Q	5	2	3	0.0935976	-0.0871321	0.0196985	-0.0117834	0.159141	STYX	0.00323275	0.959023	0.0556854	0.970161	CENTER
ACINU_454	sp|Q9JIX8|ACINU_MOUSE	Q9JIX8	454	0.999	MEPVEGPAPPVLIQLSPPNTDAGAREPLASP	S	P	P	N	5	2	3	-0.148084	-0.252034	0.159593	0.0739119	0.0902339	STYX	-0.200059	0.270006	0.107913	0.817447	CENTER
ACINU_479	sp|Q9JIX8|ACINU_MOUSE	Q9JIX8	479	0.998	EPLASPHPAQLLRSLSPLSGTTDTKAESPAG	S	P	L	S	5	2	3	0.286062	0.357048	0.398966	0.415149	0.394	STYX	0.321555	0.136402	0.402705	0.23002	CENTER
ACINU_710	sp|Q9JIX8|ACINU_MOUSE	Q9JIX8	710	1	EKAPTFSASVRGRHLSHPEPEQQHVIQRLQP	S	H	P	E	5	2	3	0.315292	0.144976	-0.0981372	-0.148356	-0.147173	STYX	0.230134	0.245728	-0.131222	0.511381	CENTER
ACINU_729	sp|Q9JIX8|ACINU_MOUSE	Q9JIX8	729	1	PEQQHVIQRLQPEQGSPKKCEAEEAEPPAAT	S	P	K	K	5	2	3	0.559798	0.326897	0.279308	0.290957	0.322789	STYX	0.443348	0.0837791	0.297684	0.37179	CENTER
ACINU_825	sp|Q9JIX8|ACINU_MOUSE	Q9JIX8	825	0.997	EKKESSMPKSFKRKISVVSATKGVQAGNSDT	S	V	V	S	5	2	3	-0.37898	-0.0971471	-0.974271	-1.37358	-2.06803	STYX	-0.238063	0.241406	-1.47196	0.00478349	NR
ACINU_838	sp|Q9JIX8|ACINU_MOUSE	Q9JIX8	838	0.997	KISVVSATKGVQAGNSDTEGGQPGRKRRWGA	S	D	T	E	5	2	3	0.434175	0.04253	-0.0142516	0.122354	-0.0382702	STYX	0.238352	0.304702	0.0232775	0.932933	CENTER
ACINU_898	sp|Q9JIX8|ACINU_MOUSE	Q9JIX8	898	0.997	GQEAVVDLHADDSRISEDETERNGDDGTHDK	S	E	D	E	5	2	3	1.19345	-0.00884406	0.201364	0.301579	1.12119	STYX	0.592301	0.248209	0.541377	0.180299	CENTER
ACL6A_233	sp|Q9Z2N8|ACL6A_MOUSE	Q9Z2N8	233	1	IPPYMIASKEAVREGSPANWKRKEKLPQVTR	S	P	A	N	5	2	3	0.274643	0.127172	0.850659	0.897688	0.643435	STYX	0.200907	0.288352	0.797261	0.0363251	CENTER
ACL7B_8	sp|Q9QY83|ACL7B_MOUSE	Q9QY83	8	0.997	________MATKNSPSPKPMGTAQGDPGEAG	S	P	K	P	5	2	3	-0.0366887	-0.0212818	0.749789	0.797173	0.583129	STYX	-0.0289853	0.904901	0.71003	0.0532899	CENTER
ACLY_447	sp|Q91V92|ACLY_MOUSE	Q91V92	447	0.978	AHTANFLLNASGSTSTPAPSRTASFSESRAD	T	P	A	P	5	2	3	0.145589	-0.0649341	-0.266457	-0.450995	-0.566556	STYX	0.0403273	0.798215	-0.428003	0.109539	CENTER
ACLY_455	sp|Q91V92|ACLY_MOUSE	Q91V92	455	0.996	NASGSTSTPAPSRTASFSESRADEVAPAKKA	S	F	S	E	5	2	3	-0.0806164	0.631409	-1.13891	-0.97036	-2.32302	STYX	0.275396	0.426025	-1.47743	0.00538525	NR
ACO10_244 245 246 247	sp|Q32MW3|ACO10_MOUSE,sp|Q9R0X4|ACOT9_MOUSE	Q32MW3	244 245 246 247	0.874	LFTQGELNKSRRIAFSTSSLLKVAPSSEERN FTQGELNKSRRIAFSTSSLLKVAPSSEERNI TQGELNKSRRIAFSTSSLLKVAPSSEERNII QGELNKSRRIAFSTSSLLKVAPSSEERNIIH	S	T	S	S	5	2	3	-0.6983	0.214138	0.50436	0.213297	0.116431	STYX	-0.242081	0.567983	0.278029	0.433759	CENTER
ACOT1_416	sp|O55137|ACOT1_MOUSE	O55137	416	0.999	QTFFHKQLGSECLHVSPKI____________	S	P	K	I	5	2	3	-0.156313	-0.144987	-0.895535	-0.903078	-1.09612	STYX	-0.15065	0.388272	-0.964909	0.00970024	NR
ACOT8_316	sp|P58137|ACOT8_MOUSE	P58137	316	0.985	VTCAQEGVIRLKPQVSESKL___________	S	E	S	K	5	2	3	-0.127209	-0.0290011	0.633386	0.477026	0.617835	STYX	-0.078105	0.672034	0.576082	0.0993792	CENTER
ACPM_69	sp|Q9CR21|ACPM_MOUSE	Q9CR21	69	0.999	LAQVPGTVTHLCRQYSDAPPLTLDGIKDRVL	S	D	A	P	4	2	2	-0.0582057	0.0441799	-0.348768	0.0661011	NA	STYX	-0.00701291	0.994208	-0.141333	0.588749	CENTER
ACSA_263	sp|Q9QXG4|ACSA_MOUSE	Q9QXG4	263	0.992	IVVKHLGRAELGMNDSPSQSPPVKRPCPDVQ	S	P	S	Q	5	2	3	0.192355	-0.0973643	0.254637	0.727147	0.651919	STYX	0.0474954	0.800215	0.544568	0.129069	CENTER
ACSA_265	sp|Q9QXG4|ACSA_MOUSE	Q9QXG4	265	0.989	VKHLGRAELGMNDSPSQSPPVKRPCPDVQIC	S	Q	S	P	5	2	3	0.116153	0.364188	0.171806	0.554052	0.478329	STYQ	0.240171	0.248071	0.401396	0.247768	CENTER
ACSA_267	sp|Q9QXG4|ACSA_MOUSE	Q9QXG4	267	0.998	HLGRAELGMNDSPSQSPPVKRPCPDVQICWN	S	P	P	V	5	2	3	0.341201	0.214316	0.244454	0.468811	0.22183	STYX	0.277759	0.180256	0.311698	0.361385	CENTER
ACSA_30	sp|Q9QXG4|ACSA_MOUSE	Q9QXG4	30	1	RAREETGAEGRVRGWSPPPEVRRSAHVPSLQ	S	P	P	P	5	2	3	-0.0390241	0.433396	0.521464	0.0134809	0.234888	STYX	0.197186	0.432266	0.256611	0.487067	CENTER
ACSL1_672	sp|P41216|ACSL1_MOUSE,sp|Q8JZR0|ACSL5_MOUSE,sp|Q91WC3|ACSL6_MOUSE,sp|Q9JHW4|SELB_MOUSE	P41216	672	0.991	IAVHPELFSIDNGLLTPTLKAKRPELRNYFR	T	P	T	L	5	2	3	-0.395593	0.0649557	1.29848	0.626889	1.36302	STYX	-0.165319	0.478178	1.09613	0.0161677	NR
ACTB_323	sp|P60710|ACTB_MOUSE,sp|P62737|ACTA_MOUSE,sp|P63260|ACTG_MOUSE,sp|P63268|ACTH_MOUSE,sp|P68033|ACTC_MOUSE,sp|P68134|ACTS_MOUSE	P60710	323	0.991	GIADRMQKEITALAPSTMKIKIIAPPERKYS	S	T	M	K	5	2	3	0.10374	0.117304	-0.088972	-0.325708	0.00952405	STYX	0.110522	0.498876	-0.135052	0.513998	CENTER
ACTL9_12	sp|Q8CG27|ACTL9_MOUSE	Q8CG27	12	0.997	____MDVNGHPKFQPSPETDGPLPLTSSTLM	S	P	E	T	5	2	3	-0.520179	-0.0285358	0.859673	0.275169	0.960568	STYX	-0.274357	0.271131	0.69847	0.0716662	CENTER
ACTT3_60	sp|Q8BXF8|ACTT3_MOUSE	Q8BXF8	60	0.999	SRQELCVGDQAQERRSFLSISYPVERGLISS	S	F	L	S	4	2	2	-0.18764	0.00504621	NA	0.0976191	0.023035	STYX	-0.0912967	0.626853	0.0603271	0.962563	CENTER
ADA10_720	sp|O35598|ADA10_MOUSE	O35598	720	1	PSSNPKLPPPKPLPGTLKRRRPPQPIQQPPR	T	L	K	R	4	2	2	-0.0215179	-0.113396	-0.45559	-0.71329	NA	STYX	-0.0674572	0.721127	-0.58444	0.106075	CENTER
ADA17_794	sp|Q9Z0F8|ADA17_MOUSE	Q9Z0F8	794	0.995	GFEKDPFPNSSTAAKSFEDLTDHPVTRSEKA	S	F	E	D	5	2	3	-0.0861066	-0.201847	-0.697289	-0.473261	-0.838907	STYX	-0.143977	0.425632	-0.669819	0.0325178	CENTER
ADAM2_729	sp|Q60718|ADAM2_MOUSE	Q60718	729	0.999	MKWRMDDFSSEEQFESESESKD_________	S	E	S	E	5	2	3	0.0826092	-0.19657	0.72822	0.805042	1.28893	STYX	-0.0569802	0.777343	0.940729	0.0233448	NR
ADAS_52	sp|Q8C0I1|ADAS_MOUSE	Q8C0I1	52	0.999	QEAPSTNECKARRAASAAGASPAATPAAPES	S	A	A	G	5	2	3	0.00867331	-0.150176	-0.0568894	-0.113461	-0.36489	STYX	-0.0707514	0.702673	-0.178414	0.420364	CENTER
ADAS_57	sp|Q8C0I1|ADAS_MOUSE	Q8C0I1	57	0.999	TNECKARRAASAAGASPAATPAAPESGTIPK	S	P	A	A	5	2	3	-0.116849	-0.108654	-0.39924	-0.178055	-0.492111	STYX	-0.112752	0.524872	-0.356469	0.163438	CENTER
ADAT1_191	sp|Q9JHI2|ADAT1_MOUSE	Q9JHI2	191	1	NLEDSKDKRNCEDPASPVAKKMRLGTPARSL	S	P	V	A	5	2	3	0.770118	0.451092	-0.230816	0.0934787	-0.339368	STYX	0.610605	0.0493407	-0.158902	0.460479	CENTER
ADCY2_1084	sp|Q80TL1|ADCY2_MOUSE	Q80TL1	1084	0.977	DLKTYFVNTEMSRSLSQSNLAS_________	S	Q	S	N	5	2	3	0.399764	-0.13466	0.046073	-0.234529	0.132757	STYQ	0.132552	0.646612	-0.0185663	0.812815	CENTER
ADCY2_471	sp|Q80TL1|ADCY2_MOUSE	Q80TL1	471	1	LVKTYFVINPKGERRSPQHLFRPRHTLDGAK	S	P	Q	H	5	2	3	0.0280338	0.127879	0.369075	0.327537	0.376121	STYX	0.0779563	0.623585	0.357578	0.284165	CENTER
ADCY5_156	sp|P84309|ADCY5_MOUSE	P84309	156	1	AAAAAAAGGTEVRPRSVELGLEERRGKGRAA	S	V	E	L	5	2	3	-0.426143	-0.315254	-0.408174	-0.457679	-0.0737925	STYX	-0.370699	0.0792501	-0.313215	0.213364	CENTER
ADCY5_62	sp|P84309|ADCY5_MOUSE	P84309	62	0.998	GGSTRGSTKRSGGAVTPQQQQRLASRWRGGD	T	P	Q	Q	4	2	2	0.0263301	-0.111618	-0.626967	-0.681349	NA	STYX	-0.0426442	0.831501	-0.654158	0.0801535	CENTER
ADCY9_613	sp|P51830|ADCY9_MOUSE	P51830	613	0.996	RESSGPRGQGTASPGSVSDLAQTVKTFDNLK	S	V	S	D	5	2	3	-0.245007	-0.0930139	-0.911651	-1.4383	-1.54574	STYX	-0.16901	0.35573	-1.29856	0.00534512	NR
ADDA_355	sp|Q9QYC0|ADDA_MOUSE	Q9QYC0	355	0.99	NLVLLDPGKYKAKSRSPGTPAGEGSGSPPKW	S	P	G	T	5	2	3	0.102473	-0.0718468	-0.479857	-0.576583	-0.143168	STYX	0.0153132	0.903921	-0.399869	0.13711	CENTER
ADDA_358	sp|Q9QYC0|ADDA_MOUSE	Q9QYC0	358	0.998	LLDPGKYKAKSRSPGTPAGEGSGSPPKWQIG	T	P	A	G	5	2	3	-0.0491805	-0.185608	-0.690274	-0.401602	-0.32854	STYX	-0.117394	0.521722	-0.473472	0.0883083	CENTER
ADDA_431	sp|Q9QYC0|ADDA_MOUSE	Q9QYC0	431	0.996	VTGHSFASDGDSGTCSPLRHSFQKQQREKTR	S	P	L	R	5	2	3	0.00449453	-0.34298	-0.56625	-0.0827022	-0.200872	STYX	-0.169243	0.420096	-0.283275	0.264034	CENTER
ADDA_464 465	sp|Q9QYC0|ADDA_MOUSE	Q9QYC0	464 465	0.895	HSGRGDDASEEGQNGSSPKSKTKWTKEDGHR SGRGDDASEEGQNGSSPKSKTKWTKEDGHRT	S	S	P	K	5	2	3	0.287973	-0.255655	-1.18421	-0.940828	-0.420018	STYX	0.0161591	0.992232	-0.848353	0.0203337	NR
ADDA_465	sp|Q9QYC0|ADDA_MOUSE	Q9QYC0	465	0.993	SGRGDDASEEGQNGSSPKSKTKWTKEDGHRT	S	P	K	S	5	2	3	0.313329	-0.316495	-0.609653	-1.19984	-0.419214	STYX	-0.0015834	0.947907	-0.742902	0.031365	CENTER
ADDA_586	sp|Q9QYC0|ADDA_MOUSE	Q9QYC0	586	0.998	ELEEYRREVERKQKGSEENLDETREQKEKSP	S	E	E	N	5	2	3	0.229382	-0.00981002	-0.510699	-1.01969	-1.07271	STYX	0.109786	0.553652	-0.867698	0.0165014	NR
ADDA_610	sp|Q9QYC0|ADDA_MOUSE	Q9QYC0	610	0.999	EQKEKSPPDQSAVPNTPPSTPVKLEEDLPQE	T	P	P	S	5	2	3	-0.219666	-0.393404	-0.361748	-0.579074	-0.267502	STYX	-0.306535	0.128216	-0.402774	0.127064	CENTER
ADDG_423	sp|Q9QYB5|ADDG_MOUSE	Q9QYB5	423	0.999	ATVTAFSFEDDSAPLSPLKFMAQRQQREKTR	S	P	L	K	5	2	3	0.266088	-0.39267	-0.342861	-0.464786	0.164626	STYX	-0.0632914	0.799171	-0.21434	0.372212	CENTER
ADDG_679	sp|Q9QYB5|ADDG_MOUSE	Q9QYB5	679	0.981	SPERTEEVLSPDGSPSKSPSKKKKKFRTPSF	S	K	S	P	5	2	3	0.0219653	-0.0186107	-0.915041	-1.04617	-0.835495	STYX	0.00167731	0.954809	-0.932235	0.0108003	NR
ADDG_681	sp|Q9QYB5|ADDG_MOUSE	Q9QYB5	681	0.996	ERTEEVLSPDGSPSKSPSKKKKKFRTPSFLK	S	P	S	K	5	2	3	-0.134339	-0.114709	-1.01641	-1.07601	-0.806632	STYX	-0.124524	0.479296	-0.966352	0.0098676	NR
ADDG_691	sp|Q9QYB5|ADDG_MOUSE,sp|Q9QYB8|ADDB_MOUSE,sp|Q9QYC0|ADDA_MOUSE	Q9QYB5	691	0.969	GSPSKSPSKKKKKFRTPSFLKKNKKKEKVEA	T	P	S	F	5	2	3	-0.544037	-0.0350173	-1.34884	-1.99354	-1.98151	STYX	-0.289527	0.255804	-1.77463	0.00326059	NR
ADGB_1297	sp|G3UZ78|ADGB_MOUSE	G3UZ78	1297	0.998	KMDIKEKHEEPAPMGSPDSHAVSEGQKSVGV	S	P	D	S	5	2	3	-0.1238	-0.143866	0.738196	1.08391	0.176729	STYX	-0.133833	0.444973	0.66628	0.0961386	CENTER
ADGB_1431	sp|G3UZ78|ADGB_MOUSE	G3UZ78	1431	0.997	FIKKPVTTDTTTSAPSPETLSVSQSQTKSSE	S	P	E	T	4	2	2	0.41215	-0.194985	NA	0.540523	0.453909	STYX	0.108583	0.753723	0.497216	0.235251	CENTER
ADGB_1509	sp|G3UZ78|ADGB_MOUSE	G3UZ78	1509	0.986	KEEPPQKEIPVVRQRSPTILETSPQQIRKAL	S	P	T	I	5	2	3	0.0788594	0.0376484	0.105626	-0.242887	-0.349895	STYX	0.0582539	0.696505	-0.162386	0.455712	CENTER
ADGB_1509 1515 1516	sp|G3UZ78|ADGB_MOUSE	G3UZ78	1509 1515 1516	0.896	KEEPPQKEIPVVRQRSPTILETSPQQIRKAL KEIPVVRQRSPTILETSPQQIRKALEFLDFS EIPVVRQRSPTILETSPQQIRKALEFLDFSH	S	P	T	I	5	2	3	-0.501452	-0.248283	0.165006	0.187384	-0.186526	STYX	-0.374867	0.0892336	0.0552881	0.974239	CENTER
ADGB_1516	sp|G3UZ78|ADGB_MOUSE	G3UZ78	1516	0.996	EIPVVRQRSPTILETSPQQIRKALEFLDFSH	S	P	Q	Q	5	2	3	-0.179024	0.242787	0.0371416	1.25716	-0.168201	STYX	0.0318814	0.907042	0.375367	0.535449	CENTER
ADIG_63	sp|Q8R400|ADIG_MOUSE	Q8R400	63	0.998	DSDLCFNWEPWSKRPSECGCEETFPGEEDGL	S	E	C	G	5	2	3	-0.0728417	-0.281065	0.12665	-0.53697	0.482247	STYX	-0.176953	0.348855	0.0239755	0.951664	CENTER
ADIP_29	sp|Q8VC66|ADIP_MOUSE	Q8VC66	29	0.995	TENKNLSQYTSETKMSPSSLYSQQVLCSSVP	S	P	S	S	5	2	3	-0.41562	-0.0904123	0.469442	0.565858	1.13313	STYX	-0.253016	0.230288	0.72281	0.0632509	CENTER
ADIP_293	sp|Q8VC66|ADIP_MOUSE	Q8VC66	293	0.999	KKVLQQMKKEMISLLSPQKKKPRERAEDGTG	S	P	Q	K	5	2	3	0.537277	0.435054	0.690918	0.388589	0.868654	STYX	0.486166	0.0657639	0.649387	0.0772821	CENTER
ADIP_313	sp|Q8VC66|ADIP_MOUSE	Q8VC66	313	0.999	KPRERAEDGTGTVAISDIEDDSGELSRDSVW	S	D	I	E	5	2	3	-0.28788	-0.36567	0.0545359	-0.220534	0.279107	STYX	-0.326775	0.103624	0.0377029	0.969116	CENTER
ADIP_342	sp|Q8VC66|ADIP_MOUSE	Q8VC66	342	0.996	VWGLSCDTVREQLTNSIRKQWRILKSHVEKL	S	I	R	K	4	2	2	0.986731	0.536771	-0.307405	NA	-0.073754	STYX	0.761751	0.0366478	-0.190579	0.484144	CENTER
ADIP_537	sp|Q8VC66|ADIP_MOUSE	Q8VC66	537	0.993	SVANGVPACTSKLTKSLPASPSTSDFRQTHS	S	L	P	A	5	2	3	-0.0288091	-0.328324	0.0611781	0.170023	0.706777	STYX	-0.178566	0.380032	0.312659	0.413628	CENTER
ADIP_541	sp|Q8VC66|ADIP_MOUSE	Q8VC66	541	0.998	GVPACTSKLTKSLPASPSTSDFRQTHSCVSE	S	P	S	T	5	2	3	-0.151402	-0.190046	0.565892	0.93148	0.73455	STYX	-0.170724	0.335698	0.743974	0.0476407	CENTER
ADIP_543	sp|Q8VC66|ADIP_MOUSE	Q8VC66	543	0.99	PACTSKLTKSLPASPSTSDFRQTHSCVSEHS	S	T	S	D	5	2	3	-0.311534	-0.0604597	-0.110477	0.35486	0.173711	STYX	-0.185997	0.343038	0.139365	0.751454	CENTER
ADIP_588 591 592	sp|Q8VC66|ADIP_MOUSE	Q8VC66	588 591 592	0.879	SEVARESTDQKWSVQSRPSSREGCYSGCSSA ARESTDQKWSVQSRPSSREGCYSGCSSAFRS RESTDQKWSVQSRPSSREGCYSGCSSAFRSA	S	R	P	S	5	2	3	-0.335513	-0.391726	0.347781	0.466555	0.250158	STYX	-0.363619	0.0806264	0.354831	0.293434	CENTER
ADIP_592	sp|Q8VC66|ADIP_MOUSE	Q8VC66	592	0.994	RESTDQKWSVQSRPSSREGCYSGCSSAFRSA	S	R	E	G	5	2	3	-0.63067	-0.046962	0.397173	0.629043	0.736803	STYX	-0.338816	0.2203	0.587673	0.0981739	CENTER
ADNP_708	sp|Q9Z103|ADNP_MOUSE	Q9Z103	708	1	QNGQDKTNAPSRLNQSPGLAPVKRTYEQMEF	S	P	G	L	4	2	2	0.110702	0.556454	NA	-0.270514	0.129063	STYX	0.333578	0.189198	-0.0707253	0.729831	CENTER
ADT1_42	sp|P48962|ADT1_MOUSE,sp|P51881|ADT2_MOUSE	P48962	42	1	APIERVKLLLQVQHASKQISAEKQYKGIIDC	S	K	Q	I	4	2	2	-0.253326	-0.107643	-0.297365	-0.822273	NA	STYX	-0.180484	0.325019	-0.559819	0.136179	CENTER
ADT4_20	sp|Q3V132|ADT4_MOUSE	Q3V132	20	0.987	SSKKQSSKKALFDPVSFSKDLLAGGVAAAVS	S	F	S	K	4	2	2	-0.347065	0.042628	1.20066	1.02671	NA	STYX	-0.152218	0.484626	1.11368	0.0381404	NR
ADX_65 66 67	sp|P46656|ADX_MOUSE	P46656	65 66 67	0.897	EAGPGRPLSVSARARSSSEDKITVHFKNRDG AGPGRPLSVSARARSSSEDKITVHFKNRDGE GPGRPLSVSARARSSSEDKITVHFKNRDGET	S	S	S	E	5	2	3	-0.374112	0.379806	-0.578708	-1.02805	-1.13606	STYX	0.0028468	0.945488	-0.914274	0.0135627	NR
AEBP2_24	sp|Q9Z248|AEBP2_MOUSE	Q9Z248	24	1	ADLEELSRLSPLSPGSPGPAARGRAEPPEEE	S	P	G	P	5	2	3	0.650156	-0.474447	1.51316	1.19803	0.22938	STYX	0.0878546	0.983522	0.980189	0.0417014	NR
AF10_252	sp|O54826|AF10_MOUSE	O54826	252	0.998	EKDKHKQKHKKQPEPSPALVPSLTVTTEKTY	S	P	A	L	5	2	3	0.284535	0.154399	0.641799	0.43124	0.889349	STYX	0.219467	0.255475	0.654129	0.0748634	CENTER
AF10_346	sp|O54826|AF10_MOUSE	O54826	346	0.989	KPGAGRNPGTAVSASSPFPQGSFSGTPGSVK	S	P	F	P	4	2	2	-0.0288989	0.101361	0.569017	0.01871	NA	STYX	0.0362313	0.799432	0.293863	0.53178	CENTER
AF10_356	sp|O54826|AF10_MOUSE	O54826	356	0.99	AVSASSPFPQGSFSGTPGSVKSSSGSSVQSP	T	P	G	S	5	2	3	0.203404	-0.063684	0.419103	0.173769	0.745435	STYX	0.0698602	0.702757	0.446103	0.213991	CENTER
AF10_370	sp|O54826|AF10_MOUSE	O54826	370	0.999	GTPGSVKSSSGSSVQSPQDFLSFTDSDLRSD	S	P	Q	D	5	2	3	-0.422521	-0.113642	0.363441	0.520497	0.701775	STYX	-0.268081	0.202619	0.528571	0.131014	CENTER
AF10_691	sp|O54826|AF10_MOUSE	O54826	691	0.998	LGGRGSSPRGSLSPRSPVSNLQLRYDQPSNS	S	P	V	S	5	2	3	-0.0186666	0.40143	0.387945	0.293881	0.67118	STYX	0.191382	0.415569	0.451002	0.19305	CENTER
AF1L2_484	sp|Q5DTU0|AF1L2_MOUSE	Q5DTU0	484	0.952	VSAAKTSLLLMQRKFSEPNTYIDGLPSRDCQ	S	E	P	N	5	2	3	-0.648943	-0.021001	-0.873134	-0.904856	-0.309117	STYX	-0.334972	0.247334	-0.695702	0.0359234	CENTER
AFAD_1081 1082 1083	sp|Q9QZQ1|AFAD_MOUSE	Q9QZQ1	1081 1082 1083	0.896	LVGLSQERAAELMTRTSSVVTLEVAKQGAIY VGLSQERAAELMTRTSSVVTLEVAKQGAIYH GLSQERAAELMTRTSSVVTLEVAKQGAIYHG	T	S	S	V	4	2	2	-0.254955	0.324325	-0.0659365	NA	-0.044242	STYX	0.0346851	0.949968	-0.0550893	0.759115	CENTER
AFAD_1083	sp|Q9QZQ1|AFAD_MOUSE	Q9QZQ1	1083	0.994	GLSQERAAELMTRTSSVVTLEVAKQGAIYHG	S	V	V	T	5	2	3	-0.479855	0.185335	-0.0647387	-0.274415	0.100136	STYX	-0.14726	0.617468	-0.0796727	0.648352	CENTER
AFAD_1107	sp|Q9QZQ1|AFAD_MOUSE	Q9QZQ1	1107	0.999	QGAIYHGLATLLNQPSPMMQRISDRRGSGKP	S	P	M	M	5	2	3	-0.683933	0.0271799	0.125964	-0.22436	-0.0855004	STYX	-0.328377	0.302269	-0.0612987	0.693658	CENTER
AFAD_1143	sp|Q9QZQ1|AFAD_MOUSE	Q9QZQ1	1143	0.997	GFELYNNSAQNGSPESPQMPWTEYSEPKKLP	S	P	Q	M	5	2	3	-0.277724	-0.369594	0.0636714	-0.137872	-0.498097	STYX	-0.323659	0.106302	-0.190766	0.418778	CENTER
AFAD_1172	sp|Q9QZQ1|AFAD_MOUSE	Q9QZQ1	1172	0.967	LPGDDRLMKNRADHRSSPNVANQPPSPGGKG	S	S	P	N	4	2	2	0.121084	0.161137	-0.130752	-0.25068	NA	STYX	0.14111	0.408768	-0.190716	0.477099	CENTER
AFAD_1172 1173	sp|Q9QZQ1|AFAD_MOUSE	Q9QZQ1	1172 1173	0.899	LPGDDRLMKNRADHRSSPNVANQPPSPGGKG PGDDRLMKNRADHRSSPNVANQPPSPGGKGP	S	S	P	N	4	2	2	-0.0986441	0.205051	-0.353748	-0.173058	NA	STYX	0.0532036	0.783995	-0.263403	0.364534	CENTER
AFAD_1182	sp|Q9QZQ1|AFAD_MOUSE	Q9QZQ1	1182	1	RADHRSSPNVANQPPSPGGKGPYTSGTAAKI	S	P	G	G	5	2	3	0.233341	0.147837	0.0317983	0.0917296	-0.0311985	STYX	0.190589	0.301162	0.0307765	0.956992	CENTER
AFAD_1201 1202	sp|Q9QZQ1|AFAD_MOUSE	Q9QZQ1	1201 1202	0.89	KGPYTSGTAAKITSVSTGNLCTEEQSPPPRP GPYTSGTAAKITSVSTGNLCTEEQSPPPRPE	S	T	G	N	5	2	3	-0.0171806	-0.176881	-0.210391	-0.30019	-0.22283	STYX	-0.097031	0.600294	-0.24447	0.288075	CENTER
AFAD_1275	sp|Q9QZQ1|AFAD_MOUSE	Q9QZQ1	1275	1	TESNHSSIAIQRVTRSQEELREEKVYQLERH	S	Q	E	E	5	2	3	0.227401	0.080064	-0.304997	-0.265092	-0.887492	STYQ	0.153733	0.394992	-0.48586	0.102417	CENTER
AFAD_1719	sp|Q9QZQ1|AFAD_MOUSE	Q9QZQ1	1719	0.996	PPPQRNASYLKTQVLSPDSLFTAKFVAYDEE	S	P	D	S	5	2	3	0.317742	0.63546	0.472951	0.692472	0.615553	STYX	0.476601	0.0781971	0.593659	0.0922581	CENTER
AFAD_216	sp|Q9QZQ1|AFAD_MOUSE	Q9QZQ1	216	0.997	EVYKDMPETSFTRTISNPEVVMKRRRQQKLE	S	N	P	E	5	2	3	-0.407791	-0.319603	-0.761597	-0.73736	-0.385824	STYX	-0.363697	0.0812138	-0.62826	0.0409313	CENTER
AFAD_246	sp|Q9QZQ1|AFAD_MOUSE	Q9QZQ1	246	0.991	EKRMQEFRSSDGRPDSGGTLRIYADSLKPNI	S	G	G	T	5	2	3	1.27228	-0.489485	-0.121142	0.472861	-0.439816	STYX	0.391398	0.883628	-0.0293654	0.766727	CENTER
AFAD_249	sp|Q9QZQ1|AFAD_MOUSE	Q9QZQ1	249	0.994	MQEFRSSDGRPDSGGTLRIYADSLKPNIPYK	T	L	R	I	4	2	2	-0.245616	-0.40713	-0.756228	NA	-0.398747	STYX	-0.326373	0.10886	-0.577487	0.113787	CENTER
AFAP1_284	sp|Q80YS6|AFAP1_MOUSE	Q80YS6	284	0.981	NKAELEKKLSSERPSSDGEGGVENGVTTCNG	S	D	G	E	4	2	2	-0.508876	-0.251423	0.0831797	0.365533	NA	STYX	-0.38015	0.0869271	0.224356	0.615538	CENTER
AFAP1_549	sp|Q80YS6|AFAP1_MOUSE	Q80YS6	549	0.998	QQKKVETAGGVKRTASNAEQYKYGKNRVEAD	S	N	A	E	5	2	3	-0.388723	-0.452735	-0.432183	-0.570448	-0.153526	STYX	-0.420729	0.0580538	-0.385386	0.146788	CENTER
AFAP1_669	sp|Q80YS6|AFAP1_MOUSE	Q80YS6	669	0.999	LGLAIEPRSGTSSPQSPVFRHRTLENSPISS	S	P	V	F	5	2	3	-0.307463	0.0488295	-0.42808	-0.0192335	-0.195348	STYX	-0.129317	0.538088	-0.214221	0.357706	CENTER
AFAP1_712	sp|Q80YS6|AFAP1_MOUSE	Q80YS6	712	0.978	NSAAVLKKSQPSSGSSPCRGHVLQKAKEWEL	S	P	C	R	4	2	2	0.710471	-0.892791	0.846941	1.6361	NA	STYX	-0.0911601	0.89341	1.24152	0.0389846	NR
AFF4_1055	sp|Q9ESC8|AFF4_MOUSE	Q9ESC8	1055	0.999	SPGLGSKAVGMPSPVSPKLSPGNSGSYSSGG	S	P	K	L	5	2	3	-0.181691	0.0496207	0.0438165	-0.199849	0.273751	STYX	-0.0660352	0.733888	0.0392396	0.973664	CENTER
AFF4_1059	sp|Q9ESC8|AFF4_MOUSE	Q9ESC8	1059	0.998	GSKAVGMPSPVSPKLSPGNSGSYSSGGSSAS	S	P	G	N	4	2	2	0.131138	-0.234497	-0.453161	-0.395093	NA	STYX	-0.0516797	0.805612	-0.424127	0.185309	CENTER
AFF4_669	sp|Q9ESC8|AFF4_MOUSE	Q9ESC8	669	0.995	LPPSSQTPKYPESNRTPVKPSSVEEEDSFFR	T	P	V	K	5	2	3	-0.317711	-0.144842	-0.181848	-0.833148	-0.307539	STYX	-0.231277	0.223966	-0.440845	0.13023	CENTER
AFF4_689	sp|Q9ESC8|AFF4_MOUSE	Q9ESC8	689	1	SSVEEEDSFFRQRMFSPMEEKELLSPLSEPD	S	P	M	E	5	2	3	-0.240152	0.00431041	-0.373323	-0.255172	-0.249689	STYX	-0.117921	0.537717	-0.292728	0.223319	CENTER
AFF4_701	sp|Q9ESC8|AFF4_MOUSE	Q9ESC8	701	0.998	RMFSPMEEKELLSPLSEPDDRYPLIVKIDLN	S	E	P	D	5	2	3	-0.386011	0.143425	-0.0863513	-0.767241	-0.450495	STYX	-0.121293	0.625577	-0.434696	0.131853	CENTER
AFF4_809	sp|Q9ESC8|AFF4_MOUSE	Q9ESC8	809	0.999	ESSKQSSTKEKDLLPSPAGPILSKDSKTEHG	S	P	A	G	5	2	3	-0.0812958	0.0917831	-0.174472	-0.344949	-0.389268	STYX	0.00524367	0.949162	-0.302896	0.214572	CENTER
AFF4_831	sp|Q9ESC8|AFF4_MOUSE	Q9ESC8	831	0.995	SKDSKTEHGSRKRTVSQSSSLKSSGTSSKEN	S	Q	S	S	4	2	2	0.0440669	0.118752	-1.02065	NA	-0.995763	STYQ	0.0814097	0.606257	-1.00821	0.0310291	NR
AFG2H_18	sp|Q3UMC0|AFG2H_MOUSE	Q3UMC0	18	0.997	SKKNRKRQKEGAEGASPSLSAAPSRSGTSTP	S	P	S	L	5	2	3	-0.19712	0.0738405	-0.440871	-0.331469	-0.664351	STYX	-0.0616398	0.756888	-0.478897	0.0839893	CENTER
AFG2H_244	sp|Q3UMC0|AFG2H_MOUSE	Q3UMC0	244	0.998	DLSFQLSQLDLKEPQSPSSQSTPCKPTNDRT	S	P	S	S	4	2	2	0.202526	-0.22595	-0.541657	-0.256611	NA	STYX	-0.0117116	0.942263	-0.399134	0.217412	CENTER
AFG2H_273	sp|Q3UMC0|AFG2H_MOUSE	Q3UMC0	273	0.994	RTVNKAGEVLLDVTQSPRDGSGLGLEESTGL	S	P	R	D	5	2	3	-0.346448	0.0567561	-0.0431566	-0.0924514	0.201163	STYX	-0.144846	0.511028	0.0218518	0.926523	CENTER
AFTIN_151	sp|Q80WT5|AFTIN_MOUSE	Q80WT5	151	0.997	KVVVQGPSTGQLRSFSPGDFRTDKNIVHQTK	S	P	G	D	5	2	3	-0.156736	0.211244	0.434461	0.0866701	0.486834	STYX	0.0272541	0.909093	0.335988	0.337813	CENTER
AFTIN_395	sp|Q80WT5|AFTIN_MOUSE	Q80WT5	395	0.997	IGSSKEENRKLTNPKSPDPDPTGQNALDDSA	S	P	D	P	4	2	2	0.165667	-0.029927	-0.0258327	NA	0.568791	STYX	0.0678699	0.683897	0.271479	0.578768	CENTER
AFTIN_679 680	sp|Q80WT5|AFTIN_MOUSE	Q80WT5	679 680	0.89	VEEEVSSLKHLLETHSSPAKTREALADRGEL EEEVSSLKHLLETHSSPAKTREALADRGELR	S	S	P	A	5	2	3	0.0292957	-0.395668	0.627362	1.423	0.883173	STYX	-0.183186	0.417506	0.977845	0.0233168	NR
AFTIN_680	sp|Q80WT5|AFTIN_MOUSE	Q80WT5	680	0.983	EEEVSSLKHLLETHSSPAKTREALADRGELR	S	P	A	K	5	2	3	-0.0855116	0.530197	0.68452	0.648592	0.925728	STYX	0.222343	0.470876	0.752947	0.0445424	CENTER
AFTIN_857 858 859 860 861	sp|Q80WT5|AFTIN_MOUSE	Q80WT5	857 858 859 860 861	0.897	GVDPELYELTTAKLETSTSSLRVTDAFAKLM VDPELYELTTAKLETSTSSLRVTDAFAKLMS DPELYELTTAKLETSTSSLRVTDAFAKLMST PELYELTTAKLETSTSSLRVTDAFAKLMSTV ELYELTTAKLETSTSSLRVTDAFAKLMSTVE	T	S	T	S	4	2	2	-0.240744	0.0725075	-0.0310656	NA	0.396073	STYX	-0.0841181	0.67565	0.182504	0.714254	CENTER
AGAP1_521	sp|Q8BXK8|AGAP1_MOUSE	Q8BXK8	521	1	PSISSSTSPKLDPPPSPHANRKKHRRKKSTS	S	P	H	A	5	2	3	0.0291802	0.0415883	-0.340856	-0.141323	-0.34698	STYX	0.0353843	0.796043	-0.276386	0.248144	CENTER
AGAP1_836	sp|Q8BXK8|AGAP1_MOUSE	Q8BXK8	836	0.998	LLQYGCPDERFVLMATPNLSRKSNSRNNSSG	T	P	N	L	5	2	3	-0.478652	-0.0547798	-0.347264	-0.603366	0.184996	STYX	-0.266716	0.251033	-0.255211	0.3277	CENTER
AGAP3_477 478	sp|Q8VHH5|AGAP3_MOUSE	Q8VHH5	477 478	0.896	PGKRLPRATPTTAPGTSPRANGLAMERSNTQ GKRLPRATPTTAPGTSPRANGLAMERSNTQL	T	S	P	R	4	2	2	0.930852	0.353976	-0.0761258	NA	-0.354823	STYX	0.642414	0.0566669	-0.215474	0.446318	CENTER
AGAP3_573	sp|Q8VHH5|AGAP3_MOUSE	Q8VHH5	573	0.998	PAESLSSSPKLEPPPSPHSNRKKHRGKKSTG	S	P	H	S	5	2	3	-0.236865	0.113978	-0.667618	-0.389655	-0.388323	STYX	-0.0614437	0.767095	-0.481865	0.0821716	CENTER
AGFG1_177	sp|Q8K2K6|AGFG1_MOUSE	Q8K2K6	177	0.961	SLLGESAPALHLNKGTPSQSPVVGRSQGQQQ	T	P	S	Q	4	2	2	-0.0388529	-0.067568	0.369099	0.295283	NA	STYX	-0.0532105	0.78789	0.332191	0.416377	CENTER
AGFG1_181	sp|Q8K2K6|AGFG1_MOUSE	Q8K2K6	181	0.999	ESAPALHLNKGTPSQSPVVGRSQGQQQEKKQ	S	P	V	V	5	2	3	0.445349	0.282461	0.494737	0.211994	0.448367	STYX	0.363905	0.114951	0.385032	0.258827	CENTER
AGM1_498	sp|Q9CYR6|AGM1_MOUSE	Q9CYR6	498	0.985	DLVKKYTLARAFVRPSGTEDIVRVYAEANSQ	S	G	T	E	5	2	3	-0.53133	0.357897	-0.645054	-0.836059	-0.435737	STYX	-0.0867164	0.798302	-0.63895	0.0383916	CENTER
AGO2_388	sp|Q8CJG0|AGO2_MOUSE	Q8CJG0	388	0.971	APDRQEEISKLMRSASFNTDPYVREFGIMVK	S	F	N	T	5	2	3	0.0305576	-0.00331859	-0.835134	-1.35174	-0.818001	STYX	0.0136195	0.898217	-1.00163	0.0102488	NR
AGRL1_1123	sp|Q80TR1|AGRL1_MOUSE	Q80TR1	1123	0.99	HSYCCIRSPPGGTHGSLKTSAMRSNTRYYTG	S	L	K	T	4	2	2	0.19006	0.17215	-0.64352	-0.681497	NA	STYX	0.181105	0.316082	-0.662508	0.0779469	CENTER
AHDC1_1060	sp|Q6PAL7|AHDC1_MOUSE	Q6PAL7	1060	0.997	SAPTPLRCDSRASTVSPGGYMVPKGTTASAA	S	P	G	G	5	2	3	0.138067	0.680725	-0.0923634	-0.133117	-0.138245	STYX	0.409396	0.147015	-0.121242	0.536961	CENTER
AHDC1_1391 1392	sp|Q6PAL7|AHDC1_MOUSE	Q6PAL7	1391 1392	0.898	LAHPPTVFDAGLQKAYSPTCSPTLGFKEELR AHPPTVFDAGLQKAYSPTCSPTLGFKEELRP	Y	S	P	T	5	2	3	-0.192004	0.74856	0.205265	0.415743	0.975113	STYX	0.278278	0.595137	0.53204	0.161505	CENTER
AHDC1_1394	sp|Q6PAL7|AHDC1_MOUSE	Q6PAL7	1394	0.992	PPTVFDAGLQKAYSPTCSPTLGFKEELRPPP	T	C	S	P	5	2	3	0.0826257	0.65672	0.262834	-0.01255	0.44676	STYX	0.369673	0.195532	0.232348	0.528606	CENTER
AHDC1_1467	sp|Q6PAL7|AHDC1_MOUSE	Q6PAL7	1467	0.998	CKGTAYWYPPGSAARSPPYEGKVGSGLLADF	S	P	P	Y	5	2	3	0.279535	0.766892	-0.146851	-0.370712	-0.252801	STYX	0.523213	0.0787509	-0.256788	0.275703	CENTER
AHDC1_1498	sp|Q6PAL7|AHDC1_MOUSE	Q6PAL7	1498	0.999	LGRTEAVCLSAPHLASPPATPKADKEPLEMA	S	P	P	A	5	2	3	0.248779	0.381844	-0.470214	-0.441738	-0.883267	STYX	0.315311	0.145017	-0.598406	0.0487179	CENTER
AHDC1_1540	sp|Q6PAL7|AHDC1_MOUSE	Q6PAL7	1540	0.996	ATAGYGCPLLSDLTLSPVPRDSLLPLQDTAY	S	P	V	P	5	2	3	-0.259901	0.0847177	0.0239608	-0.355916	0.175334	STYX	-0.0875917	0.668999	-0.0522072	0.732376	CENTER
AHDC1_892	sp|Q6PAL7|AHDC1_MOUSE	Q6PAL7	892	0.999	AQRGLATFPSRGAKASPVAVGSSGAGADPSF	S	P	V	A	5	2	3	-0.0519319	0.00616607	-0.0879361	-0.109437	-0.239207	STYX	-0.0228829	0.929373	-0.145527	0.481619	CENTER
AHI1_855 856	sp|Q8K3E5|AHI1_MOUSE	Q8K3E5	855 856	0.882	VIRSCAAKVNKNLSMTSPPPGPAKKPRVKQS IRSCAAKVNKNLSMTSPPPGPAKKPRVKQSF	T	S	P	P	5	2	3	0.145593	0.0162609	0.339685	0.533455	0.629616	STYX	0.0809272	0.617706	0.500919	0.148291	CENTER
AHI1_856	sp|Q8K3E5|AHI1_MOUSE	Q8K3E5	856	0.989	IRSCAAKVNKNLSMTSPPPGPAKKPRVKQSF	S	P	P	P	5	2	3	0.35411	0.220199	0.535588	0.15996	0.198609	STYX	0.287154	0.171032	0.298052	0.400201	CENTER
AIDA_161	sp|Q8C4Q6|AIDA_MOUSE	Q8C4Q6	161	0.999	SFSARVPGTLLPRLPSEPGMTLLTIRIEKIG	S	E	P	G	5	2	3	-0.102024	0.231058	0.741756	-0.118319	0.182975	STYX	0.0645172	0.75321	0.268804	0.526464	CENTER
AIFM1_267	sp|Q9Z0X1|AIFM1_MOUSE	Q9Z0X1	267	0.994	FEKCLIATGGTPRSLSAIDRAGAEVKSRTTL	S	A	I	D	4	2	2	-0.389066	-0.0200906	-0.46929	0.0241485	NA	STYX	-0.204578	0.343496	-0.222571	0.457082	CENTER
AIMP2_36	sp|Q8R010|AIMP2_MOUSE	Q8R010	36	0.987	PTCMYRLPNVHSKTTSPATDAGHVQETSEPS	S	P	A	T	5	2	3	0.0410124	0.0377874	0.209013	0.0327771	-0.170377	STYX	0.0393999	0.777343	0.0238043	0.93361	CENTER
AJUBA_129	sp|Q91XC0|AJUBA_MOUSE	Q91XC0	129	0.999	SSPPDFRLETTAPALSPRSSFASSSASDASK	S	P	R	S	5	2	3	-0.455626	0.0761689	-0.408704	-0.397213	-0.738135	STYX	-0.189729	0.459323	-0.514684	0.0707414	CENTER
AJUBA_146 147	sp|Q91XC0|AJUBA_MOUSE	Q91XC0	146 147	0.878	RSSFASSSASDASKPSSPRGSLLLDGAGASG SSFASSSASDASKPSSPRGSLLLDGAGASGA	S	S	P	R	5	2	3	0.447242	-0.477005	-0.610655	-0.994705	-0.694435	STYX	-0.0148816	0.905169	-0.766599	0.0213184	CENTER
AJUBA_239	sp|Q91XC0|AJUBA_MOUSE	Q91XC0	239	0.977	CAHRSVGFGCQESRHSYPPALGSPGALTGAV	S	Y	P	P	4	2	2	-0.518494	-0.25541	NA	-0.182594	-0.196421	STYX	-0.386952	0.0836785	-0.189508	0.478344	CENTER
AJUBA_272	sp|Q91XC0|AJUBA_MOUSE	Q91XC0	272	0.996	TAGPLERRGAQPGRHSVTGYGDCAAGARYQD	S	V	T	G	5	2	3	-0.239907	0.0281335	-0.42762	-0.0868736	-0.719947	STYX	-0.105887	0.586511	-0.41148	0.144429	CENTER
AK17B_704	sp|A2A3V1|AK17B_MOUSE	A2A3V1	704	0.998	KIHSHGVKDSQHIRKSPVSSSLRSVDVGLPL	S	P	V	S	5	2	3	-0.0613077	0.0858215	-0.952829	-0.947947	-0.733842	STYX	0.0122569	0.90945	-0.878206	0.0130328	NR
AKA10_187	sp|O88845|AKA10_MOUSE	O88845	187	0.995	HSLNTVKQSSLAEPVSPSKRHETPASSVTEA	S	P	S	K	5	2	3	0.395516	0.204792	0.279308	0.21082	0.173374	STYX	0.300154	0.165678	0.221167	0.526464	CENTER
AKA10_255	sp|O88845|AKA10_MOUSE	O88845	255	0.992	QEGHSARSLHREVARTGSHQIPTDSQDSSSR	T	G	S	H	4	2	2	0.231943	0.092377	-0.353816	0.140782	NA	STYX	0.16216	0.373168	-0.106517	0.663468	CENTER
AKA10_52	sp|O88845|AKA10_MOUSE	O88845	52	0.998	KTLDVKSTKASVAVHSPQKSTKNHALLEAAG	S	P	Q	K	5	2	3	0.792214	0.536536	0.645107	0.175084	-0.00411007	STYX	0.664375	0.0411235	0.272027	0.483418	CENTER
AKA12_1285	sp|Q9WTQ5|AKA12_MOUSE	Q9WTQ5	1285	0.998	RDSEVMEVARCQETESNEEQSISPEKREMGT	S	N	E	E	5	2	3	-0.143171	-0.072647	-0.195045	-0.0453317	-0.163228	STYX	-0.107909	0.542481	-0.134535	0.505243	CENTER
AKA12_1292	sp|Q9WTQ5|AKA12_MOUSE	Q9WTQ5	1292	0.999	VARCQETESNEEQSISPEKREMGTDVEKEET	S	P	E	K	5	2	3	0.324419	-0.139021	0.551825	0.455369	0.409118	STYX	0.0926986	0.724247	0.472104	0.165769	CENTER
AKA12_1355	sp|Q9WTQ5|AKA12_MOUSE	Q9WTQ5	1355	0.982	MPHSERGKALGSLEGSPSLPDQDKADCIEVQ	S	P	S	L	5	2	3	-0.277518	0.113991	-0.135111	-0.0470563	0.539771	STYX	-0.0817633	0.701755	0.119201	0.857244	CENTER
AKA12_1645	sp|Q9WTQ5|AKA12_MOUSE	Q9WTQ5	1645	0.997	LAKAEADASGNLTKESPDTNGPKLTEEGDAL	S	P	D	T	5	2	3	0.267234	-0.111565	-0.806039	-1.17173	-1.43465	STYX	0.0778348	0.725597	-1.13747	0.00721434	NR
AKA12_228	sp|Q9WTQ5|AKA12_MOUSE	Q9WTQ5	228	0.999	SKESELKQSTEKQEGTLKQAQSSTEIPLQAE	T	L	K	Q	5	2	3	0.111096	-0.408406	0.291296	-1.04925	-0.161827	STYX	-0.148655	0.548615	-0.306595	0.391772	CENTER
AKA12_234	sp|Q9WTQ5|AKA12_MOUSE	Q9WTQ5	234	0.993	KQSTEKQEGTLKQAQSSTEIPLQAESGQGTE	S	S	T	E	5	2	3	-0.350066	-0.350401	-0.48306	-0.571886	-0.125447	STYX	-0.350233	0.0869894	-0.393465	0.143386	CENTER
AKA12_234 235 236	sp|Q9WTQ5|AKA12_MOUSE	Q9WTQ5	234 235 236	0.898	KQSTEKQEGTLKQAQSSTEIPLQAESGQGTE QSTEKQEGTLKQAQSSTEIPLQAESGQGTEE STEKQEGTLKQAQSSTEIPLQAESGQGTEEE	S	S	T	E	5	2	3	0.0863469	-0.129334	-0.224217	-0.371883	-0.0105097	STYX	-0.0214935	0.924634	-0.202203	0.374077	CENTER
AKA12_270	sp|Q9WTQ5|AKA12_MOUSE	Q9WTQ5	270	0.996	DGEENREKEPTKPLESPTSPVSNETTSSFKK	S	P	T	S	5	2	3	-0.371369	-0.195979	-0.800944	-0.500126	-0.331306	STYX	-0.283674	0.152037	-0.544125	0.0643681	CENTER
AKA12_272 273	sp|Q9WTQ5|AKA12_MOUSE	Q9WTQ5	272 273	0.857	EENREKEPTKPLESPTSPVSNETTSSFKKFF ENREKEPTKPLESPTSPVSNETTSSFKKFFT	T	S	P	V	5	2	3	-0.176256	-0.311621	-0.752402	0.210554	0.364974	STYX	-0.243938	0.198109	-0.0589579	0.834656	CENTER
AKA12_273	sp|Q9WTQ5|AKA12_MOUSE	Q9WTQ5	273	0.997	ENREKEPTKPLESPTSPVSNETTSSFKKFFT	S	P	V	S	5	2	3	-0.286934	-0.203312	0.199419	0.449298	0.656108	STYX	-0.245123	0.190529	0.434942	0.214911	CENTER
AKA12_310 311	sp|Q9WTQ5|AKA12_MOUSE	Q9WTQ5	310 311	0.852	RKKTSFKKPKEDDLETSEKRKEQEAEKVDEE KKTSFKKPKEDDLETSEKRKEQEAEKVDEEE	T	S	E	K	5	2	3	0.267401	-0.208073	-0.167803	-0.140812	0.854645	STYX	0.0296638	0.927942	0.18201	0.806919	CENTER
AKA12_350	sp|Q9WTQ5|AKA12_MOUSE	Q9WTQ5	350	0.996	AEEQEPAEGTDQARLSADYEKVELPLEDQVG	S	A	D	Y	5	2	3	-0.373562	-0.186135	-0.432451	0.493842	1.13512	STYX	-0.279848	0.158315	0.398838	0.428081	CENTER
AKA12_371	sp|Q9WTQ5|AKA12_MOUSE	Q9WTQ5	371	1	VELPLEDQVGDLEALSEKCAPLATEVFDEKT	S	E	K	C	5	2	3	-0.844325	-0.216511	0.0466295	0.222985	1.24252	STYX	-0.530418	0.076293	0.504045	0.269768	CENTER
AKA12_489	sp|Q9WTQ5|AKA12_MOUSE	Q9WTQ5	489	0.993	PKHPEGIVSEVEMLSSQERIKVQGSPLKKLF	S	Q	E	R	4	2	2	-0.466907	-0.0521596	NA	-0.47246	-0.194926	STYQ	-0.259533	0.259447	-0.333693	0.28094	CENTER
AKA12_498	sp|Q9WTQ5|AKA12_MOUSE	Q9WTQ5	498	1	EVEMLSSQERIKVQGSPLKKLFSSSGLKKLS	S	P	L	K	5	2	3	0.210687	0.0088704	0.490995	0.183283	-0.321393	STYX	0.109779	0.541884	0.117628	0.834247	CENTER
AKA12_507	sp|Q9WTQ5|AKA12_MOUSE	Q9WTQ5	507	0.991	RIKVQGSPLKKLFSSSGLKKLSGKKQKGKRG	S	G	L	K	5	2	3	-0.24168	-0.470007	-0.16379	-0.706373	-0.0881472	STYX	-0.355843	0.0974466	-0.319437	0.242761	CENTER
AKA12_583 584	sp|Q9WTQ5|AKA12_MOUSE	Q9WTQ5	583 584	0.898	GPSEAPQEAEAEEGATSDGEKKREGITPWAS PSEAPQEAEAEEGATSDGEKKREGITPWASF	T	S	D	G	4	2	2	0.0200583	-0.184392	-0.0665743	-0.41704	NA	STYX	-0.0821671	0.665396	-0.241807	0.410462	CENTER
AKA12_584	sp|Q9WTQ5|AKA12_MOUSE	Q9WTQ5	584	0.996	PSEAPQEAEAEEGATSDGEKKREGITPWASF	S	D	G	E	4	2	2	-0.0217681	-0.324935	0.0219493	-0.172255	NA	STYX	-0.173351	0.393992	-0.0751529	0.716352	CENTER
AKA12_598	sp|Q9WTQ5|AKA12_MOUSE	Q9WTQ5	598	0.999	TSDGEKKREGITPWASFKKMVTPKKRVRRPS	S	F	K	K	5	2	3	-0.527393	-0.419356	-0.346202	-1.25395	-0.377312	STYX	-0.473375	0.0455893	-0.659155	0.0573329	CENTER
AKA12_613	sp|Q9WTQ5|AKA12_MOUSE	Q9WTQ5	613	0.997	SFKKMVTPKKRVRRPSESDKEEELDKVKSAT	S	E	S	D	5	2	3	0.154506	-0.306106	-0.694953	-0.262372	-0.581253	STYX	-0.0758	0.736008	-0.512859	0.0745855	CENTER
AKA12_630 631 632 637	sp|Q9WTQ5|AKA12_MOUSE	Q9WTQ5	630 631 632 637	0.899	SDKEEELDKVKSATLSSTESTASGMQDEVRA DKEEELDKVKSATLSSTESTASGMQDEVRAV KEEELDKVKSATLSSTESTASGMQDEVRAVG DKVKSATLSSTESTASGMQDEVRAVGEEQRS	S	S	T	E	4	2	2	0.0593465	0.088235	0.0112189	-0.122534	NA	STYX	0.0737908	0.633972	-0.0556573	0.759604	CENTER
AKA12_631	sp|Q9WTQ5|AKA12_MOUSE	Q9WTQ5	631	0.994	DKEEELDKVKSATLSSTESTASGMQDEVRAV	S	T	E	S	4	2	2	-0.104728	0.25113	NA	-0.0914418	0.0908138	STYX	0.0732011	0.732024	-0.00031397	0.891888	CENTER
AKA12_634 635	sp|Q9WTQ5|AKA12_MOUSE	Q9WTQ5	634 635	0.899	EELDKVKSATLSSTESTASGMQDEVRAVGEE ELDKVKSATLSSTESTASGMQDEVRAVGEEQ	S	T	A	S	5	2	3	0.0252847	0.0839854	-0.374964	-0.0579795	-0.0249021	STYX	0.054635	0.714229	-0.152615	0.477829	CENTER
AKA12_637	sp|Q9WTQ5|AKA12_MOUSE	Q9WTQ5	637	1	DKVKSATLSSTESTASGMQDEVRAVGEEQRS	S	G	M	Q	5	2	3	-0.0882629	-0.00898449	-0.247488	-0.246074	-0.431767	STYX	-0.0486237	0.803782	-0.308443	0.207442	CENTER
AKA12_652	sp|Q9WTQ5|AKA12_MOUSE	Q9WTQ5	652	1	SGMQDEVRAVGEEQRSEEPKRRVDTSVSWEA	S	E	E	P	5	2	3	0.193069	-0.0477562	-0.277386	-0.169507	-0.151732	STYX	0.0726566	0.682327	-0.199542	0.368883	CENTER
AKA12_682	sp|Q9WTQ5|AKA12_MOUSE	Q9WTQ5	682	0.986	ALICVGSSKKRARKASSSDDEGGPRTLGGDG	S	S	S	D	5	2	3	1.95925	-1.6085	1.61286	1.0986	-0.390987	STYX	0.175376	0.987294	0.773492	0.199106	CENTER
AKA12_684	sp|Q9WTQ5|AKA12_MOUSE	Q9WTQ5	684	1	ICVGSSKKRARKASSSDDEGGPRTLGGDGHR	S	D	D	E	5	2	3	1.07711	-1.03966	1.1004	0.799965	0.438052	STYX	0.0187255	0.95445	0.779471	0.047413	CENTER
AKA12_767	sp|Q9WTQ5|AKA12_MOUSE	Q9WTQ5	767	0.999	PRKKSKSKLEERAEDSGAEQLASEIEPSREE	S	G	A	E	5	2	3	-0.27314	-0.222118	0.146254	0.23443	0.552294	STYX	-0.247629	0.183016	0.310993	0.378711	CENTER
AKA12_783	sp|Q9WTQ5|AKA12_MOUSE	Q9WTQ5	783	0.998	GAEQLASEIEPSREESWVSIKKFIPGRRKKR	S	W	V	S	5	2	3	-0.247202	-0.0954547	0.237975	-0.379905	-0.134878	STYX	-0.171328	0.349724	-0.0922692	0.625143	CENTER
AKA12_885	sp|Q9WTQ5|AKA12_MOUSE	Q9WTQ5	885	0.981	HTVSVAVIDGTRAVTSAEERSPSWISASMTE	S	A	E	E	5	2	3	0.0239953	0.201307	0.304456	-0.107157	0.275502	STYX	0.112651	0.523333	0.157601	0.696807	CENTER
AKA12_890	sp|Q9WTQ5|AKA12_MOUSE	Q9WTQ5	890	0.997	AVIDGTRAVTSAEERSPSWISASMTEPLEHA	S	P	S	W	5	2	3	-0.325705	-0.525221	0.0499734	-0.28853	-0.374129	STYX	-0.425463	0.0624637	-0.204229	0.374288	CENTER
AKA12_892	sp|Q9WTQ5|AKA12_MOUSE	Q9WTQ5	892	0.997	IDGTRAVTSAEERSPSWISASMTEPLEHAEG	S	W	I	S	5	2	3	-0.140762	-0.176189	-0.0745066	-0.694881	-0.273258	STYX	-0.158475	0.370035	-0.347548	0.20229	CENTER
AKA12_910	sp|Q9WTQ5|AKA12_MOUSE	Q9WTQ5	910	0.999	SASMTEPLEHAEGVATPPVGEVTEKDITAEA	T	P	P	V	5	2	3	-0.577039	-0.0722489	0.401351	0.212021	0.20211	STYX	-0.324644	0.201862	0.271827	0.429803	CENTER
AKAP1_101	sp|O08715|AKAP1_MOUSE	O08715	101	0.997	TEPLALPRTRQVRRRSESSGNLPSVADTRSQ	S	E	S	S	5	2	3	-0.449268	-0.0610988	-0.58005	-0.385583	-0.210901	STYX	-0.255183	0.255239	-0.392178	0.137023	CENTER
AKAP1_103	sp|O08715|AKAP1_MOUSE	O08715	103	0.991	PLALPRTRQVRRRSESSGNLPSVADTRSQPG	S	S	G	N	5	2	3	0.490263	-0.116345	0.227178	0.358112	-0.0451851	STYX	0.186959	0.551093	0.180035	0.643691	CENTER
AKAP1_103 104	sp|O08715|AKAP1_MOUSE	O08715	103 104	0.892	PLALPRTRQVRRRSESSGNLPSVADTRSQPG LALPRTRQVRRRSESSGNLPSVADTRSQPGP	S	S	G	N	5	2	3	-0.404568	-0.134736	-0.151355	0.271262	-0.0248311	STYX	-0.269652	0.187308	0.0316919	0.95015	CENTER
AKAP1_138	sp|O08715|AKAP1_MOUSE	O08715	138	1	EIAKVELSLMGDKAKSIPLGCPLLPKDASFP	S	I	P	L	5	2	3	-0.263104	-0.254802	0.215545	0.225694	0.601002	STYX	-0.258953	0.165094	0.347414	0.322094	CENTER
AKAP1_380	sp|O08715|AKAP1_MOUSE	O08715	380	0.998	TSDPASTRTGATASPSAEALPPKTYVSCLSS	S	A	E	A	5	2	3	-0.174744	-0.0605188	0.2145	-0.0798924	0.281322	STYX	-0.117631	0.516979	0.138643	0.741127	CENTER
AKAP1_55	sp|O08715|AKAP1_MOUSE	O08715	55	1	VETLKVGPAIKDRRLSEEACPGVLSVAPTVT	S	E	E	A	5	2	3	-0.159124	-0.18115	-0.363715	-0.400951	-0.31732	STYX	-0.170137	0.335303	-0.360662	0.150996	CENTER
AKAP2_768	sp|O54931|AKAP2_MOUSE	O54931	768	0.994	EEELKRQRQVRQSTPSPRAKNAPSLPSRTTC	S	P	R	A	5	2	3	0.190474	-0.540348	-0.997711	-0.750165	-1.60893	STYX	-0.174937	0.592644	-1.11893	0.00863605	NR
AKAP3_192	sp|O88987|AKAP3_MOUSE	O88987	192	0.991	SELVNETVTACSKNISSDKAPGSGDRASGSS	S	S	D	K	5	2	3	0.291481	-0.345334	1.66251	1.34989	0.479493	STYX	-0.0269266	0.887183	1.16396	0.0193075	NR
AKAP3_199	sp|O88987|AKAP3_MOUSE	O88987	199	0.999	VTACSKNISSDKAPGSGDRASGSSQAPGLRY	S	G	D	R	5	2	3	0.167771	-0.537646	2.03568	1.87664	1.39478	STYX	-0.184937	0.561289	1.76903	0.00409647	NR
AKAP3_206 207	sp|O88987|AKAP3_MOUSE	O88987	206 207	0.894	ISSDKAPGSGDRASGSSQAPGLRYTSTLKIK SSDKAPGSGDRASGSSQAPGLRYTSTLKIKE	S	S	Q	A	5	2	3	0.00376344	0.057074	0.16079	0.268855	0.666823	STYX	0.0304187	0.821419	0.365489	0.304661	CENTER
AKAP3_260	sp|O88987|AKAP3_MOUSE	O88987	260	1	VFESRNAGDAKEGGRSLPGDQKLFRTSPDNR	S	L	P	G	4	2	2	0.188068	-0.409735	0.980819	NA	1.32888	STYX	-0.110834	0.670393	1.15485	0.0368161	NR
AKAP3_407	sp|O88987|AKAP3_MOUSE	O88987	407	0.996	FPENIRRARDKSESYSLISTKSRAGDPKLSN	S	L	I	S	4	2	2	-0.236842	-0.812853	NA	0.0911374	1.14843	STYX	-0.524848	0.0694827	0.619784	0.260986	CENTER
AKAP3_576	sp|O88987|AKAP3_MOUSE	O88987	576	1	PPPPSPVVQDECKLKSPPHKICDQEQTEKKD	S	P	P	H	5	2	3	1.4304	-1.20218	2.70373	2.98421	2.41492	STYX	0.114109	0.976161	2.70095	0.0029116	NR
AKAP3_644	sp|O88987|AKAP3_MOUSE	O88987	644	1	IHPCERPKTPCERPITPPAPKFCEDEEATGG	T	P	P	A	5	2	3	-0.377951	0.0436834	1.67634	1.34282	1.23591	STYX	-0.167134	0.456664	1.41836	0.00588969	NR
AKAP3_701	sp|O88987|AKAP3_MOUSE	O88987	701	0.997	DSVMKLCLIIAKSCDSPLSELGEEKCGDASR	S	P	L	S	5	2	3	0.169792	-0.329325	1.07503	1.15703	1.77594	STYX	-0.0797665	0.730585	1.336	0.00773908	NR
AKAP3_719	sp|O88987|AKAP3_MOUSE	O88987	719	0.995	SELGEEKCGDASRPNSAFPDNLYECLPVKGT	S	A	F	P	5	2	3	0.0672722	-0.659752	1.41146	1.24464	1.7997	STYX	-0.29624	0.365605	1.48527	0.00544651	NR
AKAP3_756	sp|O88987|AKAP3_MOUSE	O88987	756	1	LQNAYLTIHNELRGLSGQPPEGCEIPKVIVS	S	G	Q	P	5	2	3	-0.0546959	-0.29895	1.31701	0.794203	1.33963	STYX	-0.176823	0.364652	1.15028	0.0119144	NR
AKAP3_818	sp|O88987|AKAP3_MOUSE	O88987	818	0.991	FAGDDEGIQEKLLQLSATAVEKGRSVGEVLQ	S	A	T	A	4	2	2	-0.191736	-0.0611326	NA	0.50428	0.589394	STYX	-0.126434	0.489352	0.546837	0.197005	CENTER
AKAP4_130	sp|Q60662|AKAP4_MOUSE	Q60662	130	0.998	LNDLQKYALGFQHALSPSASSCKHKVGDLEG	S	P	S	A	5	2	3	-0.463644	0.401095	1.02564	1.01725	0.958484	STYX	-0.0312744	0.881674	1.00046	0.0156755	NR
AKAP4_132	sp|Q60662|AKAP4_MOUSE	Q60662	132	0.995	DLQKYALGFQHALSPSASSCKHKVGDLEGDY	S	A	S	S	5	2	3	-0.342394	0.455866	0.723655	0.0891622	0.93135	STYX	0.0567359	0.955705	0.581389	0.136902	CENTER
AKAP4_134	sp|Q60662|AKAP4_MOUSE	Q60662	134	0.989	QKYALGFQHALSPSASSCKHKVGDLEGDYSK	S	S	C	K	5	2	3	-0.434165	0.200914	1.26099	1.41646	0.968892	STYX	-0.116625	0.672445	1.21545	0.00907318	NR
AKAP4_182	sp|Q60662|AKAP4_MOUSE	Q60662	182	1	YLNKGPQNLRLEMAASKNTNNNQSPSNPATK	S	K	N	T	4	2	2	-0.15335	-0.327662	1.34859	NA	1.2647	STYX	-0.240506	0.20891	1.30665	0.0271204	NR
AKAP4_190	sp|Q60662|AKAP4_MOUSE	Q60662	190	0.998	LRLEMAASKNTNNNQSPSNPATKSPSNQRSV	S	P	S	N	5	2	3	0.435078	-0.284164	1.36926	1.1217	1.71332	STYX	0.075457	0.891007	1.40142	0.00640827	NR
AKAP4_204	sp|Q60662|AKAP4_MOUSE	Q60662	204	0.969	QSPSNPATKSPSNQRSVATPEGECSMDDLSF	S	V	A	T	4	2	2	-0.205263	-0.306416	0.163389	NA	-0.696993	STYX	-0.25584	0.177021	-0.266802	0.464698	CENTER
AKAP4_207	sp|Q60662|AKAP4_MOUSE	Q60662	207	0.999	SNPATKSPSNQRSVATPEGECSMDDLSFYVN	T	P	E	G	5	2	3	-0.37509	-0.42718	0.679404	0.391134	0.400652	STYX	-0.401135	0.0639993	0.490397	0.156883	CENTER
AKAP4_213	sp|Q60662|AKAP4_MOUSE	Q60662	213	0.999	SPSNQRSVATPEGECSMDDLSFYVNRLSSLV	S	M	D	D	5	2	3	-0.467418	-0.360245	0.0666368	-0.216974	0.0832562	STYX	-0.413831	0.0616447	-0.0223603	0.801643	CENTER
AKAP4_218	sp|Q60662|AKAP4_MOUSE	Q60662	218	0.997	RSVATPEGECSMDDLSFYVNRLSSLVIQMAR	S	F	Y	V	5	2	3	0.0952154	-0.578388	0.149123	0.823723	1.18388	STYX	-0.241586	0.433785	0.71891	0.086247	CENTER
AKAP4_271	sp|Q60662|AKAP4_MOUSE	Q60662	271	0.999	DKGKTSPRSAVSKIASEMAHEAVELTSSEMR	S	E	M	A	5	2	3	-0.25529	-0.199184	0.862549	0.205525	0.72737	STYX	-0.227237	0.214384	0.598481	0.111001	CENTER
AKAP4_30	sp|Q60662|AKAP4_MOUSE	Q60662	30	0.987	DWLHSRRGVCKVDLYSPKGQQDQDRKVICFV	S	P	K	G	5	2	3	0.0588085	0.00986886	1.60183	1.68059	2.04597	STYX	0.0343387	0.803957	1.77613	0.00388091	NR
AKAP4_327	sp|Q60662|AKAP4_MOUSE	Q60662	327	0.995	EKQQMCPKDSKEFADSISKGLMVYANQVASD	S	I	S	K	5	2	3	0.253419	-0.364868	1.2558	1.44576	1.45398	STYX	-0.0557243	0.811803	1.38518	0.00595014	NR
AKAP4_341	sp|Q60662|AKAP4_MOUSE	Q60662	341	0.999	DSISKGLMVYANQVASDMMVSVMKTLKVHSC	S	D	M	M	5	2	3	-0.00968942	-0.213159	0.70176	0.0378496	0.970334	STYX	-0.111424	0.554708	0.569981	0.153398	CENTER
AKAP4_355	sp|Q60662|AKAP4_MOUSE	Q60662	355	1	ASDMMVSVMKTLKVHSCGKPIPACVVLKRVL	S	C	G	K	4	2	2	-0.235561	-0.387687	0.733471	0.762219	NA	STYX	-0.311624	0.120848	0.747845	0.0995898	CENTER
AKAP4_444	sp|Q60662|AKAP4_MOUSE	Q60662	444	0.996	LVSALLGEKKETKSQSLAYATLKAGTNDPKC	S	L	A	Y	5	2	3	0.0159554	-0.386629	2.01361	1.22111	1.83728	STYX	-0.185337	0.401529	1.69067	0.00465885	NR
AKAP4_463	sp|Q60662|AKAP4_MOUSE	Q60662	463	0.999	ATLKAGTNDPKCKNQSLEFSAMKAEMKGKDK	S	L	E	F	5	2	3	0.0244246	-0.344652	1.21075	0.826483	1.39715	STYX	-0.160114	0.453742	1.14479	0.0117033	NR
AKAP4_489	sp|Q60662|AKAP4_MOUSE	Q60662	489	0.994	KGKDKCKSKADPCCKSLTSAERVSEHILKES	S	L	T	S	5	2	3	0.207294	-0.162444	1.04426	1.09729	1.12743	STYX	0.0224246	0.927227	1.08966	0.0118194	NR
AKAP4_492	sp|Q60662|AKAP4_MOUSE	Q60662	492	0.958	DKCKSKADPCCKSLTSAERVSEHILKESLTM	S	A	E	R	5	2	3	-0.0664886	-0.29443	1.89804	1.86311	2.02201	STYX	-0.180459	0.348392	1.92772	0.00348699	NR
AKAP4_504	sp|Q60662|AKAP4_MOUSE	Q60662	504	0.988	SLTSAERVSEHILKESLTMWNNQKQGNQGKV	S	L	T	M	5	2	3	0.0078741	-0.268073	1.20913	0.406115	1.62668	STYX	-0.1301	0.505257	1.08064	0.0253726	NR
AKAP4_536	sp|Q60662|AKAP4_MOUSE	Q60662	536	0.979	NKVCCTSKDEKREKISPSTDSLAKDLIVSAL	S	P	S	T	5	2	3	0.176091	-0.14908	2.10557	1.70221	1.95551	STYX	0.0135053	0.948355	1.9211	0.00354467	NR
AKAP4_538	sp|Q60662|AKAP4_MOUSE	Q60662	538	0.994	VCCTSKDEKREKISPSTDSLAKDLIVSALML	S	T	D	S	5	2	3	0.0638817	-0.376794	1.85025	1.1952	1.43245	STYX	-0.156456	0.492184	1.49263	0.00558328	NR
AKAP4_538 539	sp|Q60662|AKAP4_MOUSE	Q60662	538 539	0.899	VCCTSKDEKREKISPSTDSLAKDLIVSALML CCTSKDEKREKISPSTDSLAKDLIVSALMLI	S	T	D	S	5	2	3	-0.0386491	-0.419957	1.0395	0.923437	1.50115	STYX	-0.229303	0.298068	1.1547	0.0114143	NR
AKAP4_63	sp|Q60662|AKAP4_MOUSE	Q60662	63	0.956	STLNVEDKDSKGAAGSRSEGELNLETLEEKE	S	R	S	E	5	2	3	-0.0733605	-0.43634	0.201909	0.868932	1.00855	STYX	-0.25485	0.242493	0.693132	0.0813435	CENTER
AKAP4_732	sp|Q60662|AKAP4_MOUSE	Q60662	732	0.994	GAALAELEEQAALVGSGSRCGRDAMMSQNYS	S	G	S	R	5	2	3	-0.0730163	-0.171601	0.240807	-0.423226	0.173038	STYX	-0.122309	0.493888	-0.00312717	0.882432	CENTER
AKAP4_734	sp|Q60662|AKAP4_MOUSE	Q60662	734	0.99	ALAELEEQAALVGSGSRCGRDAMMSQNYSET	S	R	C	G	5	2	3	-0.00224814	-0.507865	0.325672	0.791502	0.455865	STYX	-0.255057	0.308964	0.524346	0.139904	CENTER
AKAP4_743	sp|Q60662|AKAP4_MOUSE	Q60662	743	0.993	ALVGSGSRCGRDAMMSQNYSETPGPEVIVNN	S	Q	N	Y	5	2	3	-0.198202	-0.80998	0.416424	0.527105	0.241922	STYQ	-0.504091	0.0848113	0.39515	0.246723	CENTER
AKAP4_749	sp|Q60662|AKAP4_MOUSE	Q60662	749	0.996	SRCGRDAMMSQNYSETPGPEVIVNNQCSTTN	T	P	G	P	5	2	3	-0.0859156	-0.398448	0.324729	-0.148338	0.147172	STYX	-0.242182	0.244996	0.107854	0.834349	CENTER
AKAP4_761	sp|Q60662|AKAP4_MOUSE	Q60662	761	0.997	YSETPGPEVIVNNQCSTTNLQKQLQAVLQWI	S	T	T	N	5	2	3	-0.231446	-0.53725	0.959084	0.572983	0.175242	STYX	-0.384348	0.0918275	0.569103	0.13554	CENTER
AKAP4_761 762 763	sp|Q60662|AKAP4_MOUSE	Q60662	761 762 763	0.899	YSETPGPEVIVNNQCSTTNLQKQLQAVLQWI SETPGPEVIVNNQCSTTNLQKQLQAVLQWIA ETPGPEVIVNNQCSTTNLQKQLQAVLQWIAA	S	T	T	N	5	2	3	-0.41128	-0.431875	0.375711	-0.0578632	0.0889119	STYX	-0.421578	0.0565793	0.135587	0.764275	CENTER
AKAP4_811 812	sp|Q60662|AKAP4_MOUSE	Q60662	811 812	0.896	LEKLPEVSAKAAEKGYSVGDLLQEVMKFAKE EKLPEVSAKAAEKGYSVGDLLQEVMKFAKER	Y	S	V	G	5	2	3	-0.186682	-0.217187	1.15067	0.245544	0.482409	STYX	-0.201934	0.263992	0.626207	0.115099	CENTER
AKAP8_336	sp|Q9DBR0|AKAP8_MOUSE	Q9DBR0	336	1	DGDLSENDDGAGDLRSGDEEFRGEDDLCDSR	S	G	D	E	5	2	3	0.335224	-0.12859	-0.205226	-0.0170139	0.27564	STYX	0.103317	0.691435	0.0178	0.909818	CENTER
AKAP8_72	sp|Q9DBR0|AKAP8_MOUSE	Q9DBR0	72	0.999	SWEATKTNDGGLAAGSPAMHVASFAPEPCTD	S	P	A	M	5	2	3	-0.131847	0.332299	-0.0319509	-0.0787193	-0.232683	STYX	0.100226	0.701004	-0.114451	0.554307	CENTER
AKIB1_738	sp|Q6ZPS6|AKIB1_MOUSE	Q6ZPS6	738	1	QEFLASVARGVAPADSPDAPRRSFAGGTWDW	S	P	D	A	5	2	3	0.0540732	0.239253	-0.548806	-0.288558	-0.425804	STYX	0.146663	0.426483	-0.421056	0.112477	CENTER
AKIB1_885	sp|Q6ZPS6|AKIB1_MOUSE	Q6ZPS6	885	0.978	TRDFLSNETSLGAIGSSLPSRLDSVPRSTES	S	S	L	P	4	2	2	-0.716197	0.407866	NA	-0.280226	-0.210418	STYX	-0.154165	0.768041	-0.245322	0.384795	CENTER
AKIR1_22	sp|Q99LF1|AKIR1_MOUSE	Q99LF1	22	0.998	LKRPMEFEAALLSPGSPKRRRCAPLPGPTPG	S	P	K	R	5	2	3	0.0254962	0.393319	-0.0044677	-0.409054	0.0119466	STYX	0.209407	0.349898	-0.133858	0.529937	CENTER
AKIR2_55	sp|B1AXD8|AKIR2_MOUSE	B1AXD8	55	0.999	PAAATAAAAASAAAASPQKYLRMEPSPFGDV	S	P	Q	K	5	2	3	0.428246	0.0926733	0.145764	0.0319815	0.156083	STYX	0.260459	0.245591	0.111276	0.809256	CENTER
AKP13_1526	sp|E9Q394|AKP13_MOUSE	E9Q394	1526	0.997	VPANCSFLRSSMRSLSPFRRHSWGPGKNAAS	S	P	F	R	4	2	2	-0.577589	0.356217	-0.845732	NA	-1.26492	STYX	-0.110686	0.773722	-1.05533	0.0312363	NR
AKP13_1532	sp|E9Q394|AKP13_MOUSE	E9Q394	1532	1	FLRSSMRSLSPFRRHSWGPGKNAASDAEMNQ	S	W	G	P	5	2	3	-0.380802	0.0647621	-0.830119	-0.346119	-0.419249	STYX	-0.15802	0.489847	-0.531829	0.0708028	CENTER
AKP13_1569	sp|E9Q394|AKP13_MOUSE	E9Q394	1569	0.999	LGHVVRRPPIHRRSFSLEGLTGGGVGNKPSS	S	L	E	G	5	2	3	-0.743006	-0.229929	-0.385822	-0.83366	-0.464644	STYX	-0.486467	0.0745368	-0.561375	0.0588706	CENTER
AKP13_1613	sp|E9Q394|AKP13_MOUSE	E9Q394	1613	0.998	NPFGGEEQRNSLMSLSEEHLEPDQRQHHRMF	S	E	E	H	5	2	3	-0.293444	-0.0737014	-0.832306	-0.707781	-0.730364	STYX	-0.183573	0.335134	-0.756817	0.0205618	CENTER
AKP13_1839	sp|E9Q394|AKP13_MOUSE	E9Q394	1839	0.999	VIMRNKSSQPKERPRSAVLLADEATAAPMFT	S	A	V	L	5	2	3	-0.322218	-0.318653	0.0291229	-0.343276	-0.399538	STYX	-0.320435	0.10701	-0.237897	0.317088	CENTER
AKP13_1892	sp|E9Q394|AKP13_MOUSE	E9Q394	1892	0.983	GNDENMSNTWKFLSHSTDSLNKICKVNESTE	S	T	D	S	5	2	3	-0.325197	0.382405	-0.809887	-1.19846	-1.26637	STYX	0.0286043	0.991065	-1.09157	0.00753345	NR
AKP13_1892 1893	sp|E9Q394|AKP13_MOUSE	E9Q394	1892 1893	0.897	GNDENMSNTWKFLSHSTDSLNKICKVNESTE NDENMSNTWKFLSHSTDSLNKICKVNESTES	S	T	D	S	5	2	3	-0.101843	0.293882	-1.11337	-1.47188	-1.83019	STYX	0.0960194	0.672116	-1.47182	0.00411179	NR
AKP13_2462	sp|E9Q394|AKP13_MOUSE	E9Q394	2462	0.997	EKEEGDDGQDLRRTESDSGLKKGGNGNLVFM	S	D	S	G	5	2	3	1.49737	-1.14298	0.0216361	0.45293	-0.805221	STYX	0.177196	0.981368	-0.110218	0.705702	CENTER
AKP13_2692	sp|E9Q394|AKP13_MOUSE	E9Q394	2692	0.999	PSVTKSGSLDSELSVSPKRNSISRTQKDKGP	S	P	K	R	5	2	3	-0.0420919	-0.0463356	-0.865812	-1.02983	-1.04879	STYX	-0.0442137	0.831062	-0.981477	0.00919914	NR
AKP13_809	sp|E9Q394|AKP13_MOUSE	E9Q394	809	0.998	DALSLVPSQKEKGTATPQLHRTTACRDGPDG	T	P	Q	L	5	2	3	0.290157	-0.0649224	-0.343885	-0.257587	-0.21477	STYX	0.112617	0.594513	-0.272081	0.248816	CENTER
AKP13_921	sp|E9Q394|AKP13_MOUSE	E9Q394	921	0.993	ESSTALGQDGKDRAMSCSSVKEDVHSSEMSR	S	C	S	S	5	2	3	0.0453464	0.0710652	-0.805077	-1.2825	-0.867129	STYX	0.0582058	0.697087	-0.984902	0.0102507	NR
AKT1_124	sp|P31750|AKT1_MOUSE	P31750	124	0.992	GLKRQEEETMDFRSGSPSDNSGAEEMEVSLA	S	P	S	D	5	2	3	-0.10663	-0.10652	-0.384112	-0.451515	-0.545237	STYX	-0.106575	0.548465	-0.460288	0.0874426	CENTER
AKT1_126	sp|P31750|AKT1_MOUSE	P31750	126	0.976	KRQEEETMDFRSGSPSDNSGAEEMEVSLAKP	S	D	N	S	4	2	2	-0.5134	-0.0361773	-0.28513	NA	-0.887611	STYX	-0.274789	0.263319	-0.58637	0.131042	CENTER
AKT2_34	sp|Q60823|AKT2_MOUSE	Q60823	34	0.996	IKTWRPRYFLLKSDGSFIGYKERPEAPDQTL	S	F	I	G	5	2	3	-0.108097	0.921908	-0.497775	-0.235901	-0.406094	STYX	0.406905	0.417441	-0.379923	0.140644	CENTER
AKT3_34	sp|Q9WUA6|AKT3_MOUSE	Q9WUA6	34	0.97	IKNWRPRYFLLKTDGSFIGYKEKPQDVDLPY	S	F	I	G	5	2	3	-0.134921	0.364438	0.434866	-0.141646	0.0956335	STYX	0.114759	0.67672	0.129618	0.793948	CENTER
AKTIP_29 30	sp|Q64362|AKTIP_MOUSE	Q64362	29 30	0.885	KRAEGEEKTLAGDVKTSPPRSAPKKQLPSIP RAEGEEKTLAGDVKTSPPRSAPKKQLPSIPK	T	S	P	P	4	2	2	-0.245971	0.324782	0.254412	NA	-0.255883	STYX	0.0394053	0.933399	-0.0007354	0.88586	CENTER
AKTS1_213	sp|Q9D1F4|AKTS1_MOUSE	Q9D1F4	213	0.993	RTEARSSDEENGPPSSPDLDRIAASMRALVL	S	P	D	L	5	2	3	-0.195124	-0.0424616	-0.345275	-0.483226	-0.368536	STYX	-0.118793	0.519457	-0.399012	0.123158	CENTER
AL1A2_351	sp|Q62148|AL1A2_MOUSE	Q62148	351	0.996	FVKRSVERAKRRIVGSPFDPTTEQGPQIDKK	S	P	F	D	5	2	3	-0.394672	-0.0268373	0.579541	0.617988	0.684053	STYX	-0.210755	0.330191	0.627194	0.077337	CENTER
AL1A7_267	sp|O35945|AL1A7_MOUSE,sp|P24549|AL1A1_MOUSE,sp|P47738|ALDH2_MOUSE,sp|Q62148|AL1A2_MOUSE,sp|Q9CZS1|AL1B1_MOUSE,sp|Q9JHW9|AL1A3_MOUSE	O35945	267	1	KLIKEAAGKSNLKRVTLELGGKSPCIVFADA	T	L	E	L	5	2	3	-0.487109	0.2377	-0.784114	-1.17766	-1.05336	STYX	-0.124705	0.684807	-1.00504	0.00909233	NR
AL2SB_85	sp|Q8BVM7|AL2SB_MOUSE	Q8BVM7	85	0.998	GNTESSKAPSEVIQVSPGYTLIRNREQISVT	S	P	G	Y	4	2	2	-0.114035	0.264628	0.0738129	-0.0463641	NA	STYX	0.0752965	0.735923	0.0137244	0.922051	CENTER
ALKB3_28	sp|Q8K1E6|ALKB3_MOUSE	Q8K1E6	28	0.999	GWATPTKSQSATQPASPARSRLSQTAGPAWR	S	P	A	R	5	2	3	0.240791	-0.130031	0.339007	0.494216	0.0433932	STYX	0.0553802	0.805699	0.292205	0.411646	CENTER
ALKB5_362	sp|Q3TSG4|ALKB5_MOUSE	Q3TSG4	362	0.994	ENRRSVLLPTHRRRGSFSSENYWRKSYESSE	S	F	S	S	5	2	3	-0.385356	-0.00628085	-0.138708	-0.463081	-0.0328249	STYX	-0.195818	0.366083	-0.211538	0.367522	CENTER
ALKB5_384 385	sp|Q3TSG4|ALKB5_MOUSE	Q3TSG4	384 385	0.896	WRKSYESSEDCPEAASSPTRKVKMRRH____ RKSYESSEDCPEAASSPTRKVKMRRH_____	S	S	P	T	5	2	3	0.482658	0.594478	0.0890763	0.365997	-0.133575	STYX	0.538568	0.055322	0.107166	0.843214	CENTER
ALKB5_385	sp|Q3TSG4|ALKB5_MOUSE	Q3TSG4	385	0.994	RKSYESSEDCPEAASSPTRKVKMRRH_____	S	P	T	R	5	2	3	0.29846	0.653917	0.0617979	0.41818	-0.120747	STYX	0.476188	0.0815679	0.119744	0.819179	CENTER
ALKB5_65	sp|Q3TSG4|ALKB5_MOUSE	Q3TSG4	65	0.999	PYPASGTTKRKYQEDSDPERSDYEEHQLQKE	S	D	P	E	5	2	3	0.616654	0.129104	-0.0833932	0.601543	0.80552	STYX	0.372879	0.161796	0.441223	0.262216	CENTER
ALLC_50	sp|Q9JHX6|ALLC_MOUSE	Q9JHX6	50	0.989	TDDFFGPAENLIKSDSPTFKEHEYTEFGKWV	S	P	T	F	5	2	3	-0.161339	-0.19613	1.42751	1.34118	1.38492	STYX	-0.178734	0.314076	1.38454	0.0058779	NR
ALMS1_117 118	sp|Q8K4E0|ALMS1_MOUSE	Q8K4E0	117 118	0.882	PTPPPPPPPLSPRLRYTPVEHLGKTEVVPLT TPPPPPPPLSPRLRYTPVEHLGKTEVVPLTC	Y	T	P	V	4	2	2	-0.124596	0.438821	-0.261745	NA	0.319878	STYX	0.157112	0.598729	0.0290665	0.948744	CENTER
ALS2_1329	sp|Q920R0|ALS2_MOUSE	Q920R0	1329	0.997	NIAVALTTNRRQHKDSPEILSRSQTQTLESL	S	P	E	I	5	2	3	0.276003	0.0289126	0.0295128	-0.0927874	-0.20739	STYX	0.152458	0.428975	-0.0902215	0.615472	CENTER
ALS2_460	sp|Q920R0|ALS2_MOUSE	Q920R0	460	0.993	EEQVKQESLQGKKSSSLMDIREEELEGGSRR	S	L	M	D	5	2	3	-0.314199	-0.153902	-0.434319	-0.313344	0.188965	STYX	-0.23405	0.216427	-0.186233	0.418891	CENTER
ALS2_486	sp|Q920R0|ALS2_MOUSE	Q920R0	486	0.999	GGSRRLSLPGLLSQVSPRLLRKAARVKTRTV	S	P	R	L	5	2	3	-0.0553533	0.159871	0.391173	0.0243042	-0.11717	STYX	0.0522591	0.751416	0.0994356	0.87106	CENTER
ALS2_504	sp|Q920R0|ALS2_MOUSE	Q920R0	504	0.996	LLRKAARVKTRTVVLTPTYSGEADALLPSLR	T	P	T	Y	5	2	3	0.217213	-0.146977	0.272288	0.184797	0.869335	STYX	0.0351178	0.877856	0.44214	0.236472	CENTER
AMER1_871 872	sp|Q7TS75|AMER1_MOUSE	Q7TS75	871 872	0.897	NSYHSRFYQGLPWGVSSLPRYLGLPGVHPRP SYHSRFYQGLPWGVSSLPRYLGLPGVHPRPP	S	S	L	P	5	2	3	-0.197375	0.0697447	-0.175684	-1.00851	-0.23179	STYX	-0.0638151	0.746979	-0.471994	0.135128	CENTER
AMER2_244	sp|Q8CCJ4|AMER2_MOUSE	Q8CCJ4	244	0.998	ECVKEEPPRAARRPDSPGQDASRHAAGEPAG	S	P	G	Q	5	2	3	0.326333	-0.079262	1.67642	1.30467	0.570871	STYX	0.123535	0.593111	1.18399	0.0162171	NR
AMERL_74	sp|Q8JZZ6|AMERL_MOUSE	Q8JZZ6	74	0.992	SGRENVSDLTLGPGNSPITRMNTASGALSPL	S	P	I	T	5	2	3	0.176608	0.0597025	-0.32919	-0.26615	0.143303	STYX	0.118155	0.489705	-0.150679	0.479701	CENTER
AMOL1_253	sp|Q9D4H4|AMOL1_MOUSE	Q9D4H4	253	1	QKSRTEGRPTVNRANSGQAHKDEALKELKQG	S	G	Q	A	4	2	2	0.738425	-0.286533	0.663605	0.00802545	NA	STYX	0.225946	0.751416	0.335815	0.484595	CENTER
AMOL1_804	sp|Q9D4H4|AMOL1_MOUSE	Q9D4H4	804	0.998	KDAGKTDSASLRPARSVPSIAAATGTHSRQT	S	V	P	S	5	2	3	-0.344349	0.0709783	0.215242	-0.156002	0.0655271	STYX	-0.136685	0.53846	0.0415889	0.984594	CENTER
AMOL1_820	sp|Q9D4H4|AMOL1_MOUSE	Q9D4H4	820	0.99	VPSIAAATGTHSRQTSLTSSQLTEEKKEEKT	S	L	T	S	5	2	3	-0.0384669	-0.335308	-0.0340891	0.172641	0.757871	STYX	-0.186888	0.358846	0.298808	0.463073	CENTER
AMOL1_840	sp|Q9D4H4|AMOL1_MOUSE	Q9D4H4	840	1	QLTEEKKEEKTTWKGSIGFLLGKEHQGQASA	S	I	G	F	5	2	3	-0.577317	-0.373133	-0.214666	-0.762401	0.425123	STYX	-0.475225	0.0489646	-0.183981	0.497939	CENTER
AMOL1_918	sp|Q9D4H4|AMOL1_MOUSE	Q9D4H4	918	0.998	ASLPSRGRLSTAPSNSPILKHPAAKGAVEKQ	S	P	I	L	4	2	2	-0.468338	-0.232835	0.715761	0.32867	NA	STYX	-0.350586	0.102198	0.522215	0.229286	CENTER
AMOT_802	sp|Q8VHG2|AMOT_MOUSE	Q8VHG2	802	0.998	APIMEEKRDDKSWKGSLGVLLGGDYRVEPVP	S	L	G	V	5	2	3	-0.236856	-0.402694	-0.0886054	-0.512975	-0.482115	STYX	-0.319775	0.115445	-0.361232	0.170116	CENTER
AMPD2_109	sp|Q9DBT5|AMPD2_MOUSE	Q9DBT5	109	0.993	PDILLRAKQDFLKTDSDSDLQLYKEQGEGQG	S	D	S	D	4	2	2	-0.249168	0.331072	NA	0.0490575	-0.0289871	STYX	0.0409521	0.93161	0.0100352	0.913319	CENTER
AMPD2_12	sp|Q9DBT5|AMPD2_MOUSE	Q9DBT5	12	0.997	____MASEARSGLGASPLQSARSLPGNAPCL	S	P	L	Q	5	2	3	0.151214	0.295722	-0.0533842	0.483068	-0.145757	STYX	0.223468	0.250847	0.0946422	0.907843	CENTER
AMRA1_1206	sp|A2AH22|AMRA1_MOUSE	A2AH22	1206	0.984	RSSQTGTESGAARTSSPQPSTSRGLPSEPGQ	S	P	Q	P	5	2	3	1.28642	-0.00471562	0.489809	0.679947	-0.202252	STYX	0.640854	0.239647	0.322501	0.422637	CENTER
AN32A_15	sp|O35381|AN32A_MOUSE,sp|Q64G17|AN32C_MOUSE	O35381	15	0.992	_MEMDKRIYLELRNRTPSDVKELVLDNCKSI	T	P	S	D	5	2	3	1.67822	-1.23172	0.542169	-0.0531546	-1.35289	STYX	0.223252	0.985228	-0.287959	0.57733	CENTER
ANC2_549	sp|Q8BZQ7|ANC2_MOUSE	Q8BZQ7	549	0.996	YRSLLADRLLHQFSFSPEREIRNVELLKLRF	S	P	E	R	5	2	3	-0.0401416	0.445075	0.126968	-0.17957	0.234583	STYX	0.202467	0.427728	0.0606605	0.960074	CENTER
ANCHR_202	sp|Q9DAZ9|ANCHR_MOUSE	Q9DAZ9	202	0.998	AEVAIDENCQPRASASLQNDLNKGAARSQRT	S	L	Q	N	4	2	2	-0.359283	-0.0960852	NA	-0.00424466	-0.260281	STYX	-0.227684	0.255239	-0.132263	0.595354	CENTER
ANCHR_69	sp|Q9DAZ9|ANCHR_MOUSE	Q9DAZ9	69	0.999	HTILTRGSSDNASKWSPPQNYKKRVAALEAK	S	P	P	Q	5	2	3	-0.230767	0.251339	-0.145197	0.00167459	0.844664	STYX	0.010286	0.994836	0.233714	0.658473	CENTER
ANDR_630	sp|P19091|ANDR_MOUSE	P19091	630	0.998	GNLKLQEEGENSNAGSPTEDPSQKMTVSHIE	S	P	T	E	4	2	2	0.00574379	0.0610195	-0.423666	-1.22812	NA	STYX	0.0333816	0.80936	-0.825896	0.0708667	CENTER
ANDR_75	sp|P19091|ANDR_MOUSE	P19091	75	0.999	TSPRRRRRQQHTEDGSPQAHIRGPTGYLALE	S	P	Q	A	5	2	3	0.126071	0.214527	-0.897552	-0.7136	-0.420808	STYX	0.170299	0.342179	-0.67732	0.0334879	CENTER
ANFY1_861	sp|Q810B6|ANFY1_MOUSE	Q810B6	861	1	TYKNNKAAEAILKRESGAAEQVDNKGRNFLH	S	G	A	A	4	2	2	0.546672	-0.0744744	-0.501229	-0.111679	NA	STYX	0.236099	0.445442	-0.306454	0.327088	CENTER
ANGE1_38	sp|Q8VCU0|ANGE1_MOUSE	Q8VCU0	38	0.993	AFFTCRKNALLAKSSSPQVEGNFAMAPRGPD	S	P	Q	V	5	2	3	-0.273629	-0.247997	0.197045	0.332357	0.331025	STYX	-0.260813	0.163354	0.286809	0.39727	CENTER
ANGT_49	sp|P11859|ANGT_MOUSE	P11859	49	0.942	LLYHNKSTCAQLENPSVETLPESTFEPVPIQ	S	V	E	T	4	2	2	-0.472156	0.0748165	-0.164641	NA	-0.506101	STYX	-0.19867	0.446584	-0.335371	0.28744	CENTER
ANK1_777	sp|Q02357|ANK1_MOUSE	Q02357	777	0.991	NGTTPLAIAKRLGYISVTDVLKVVTDETSVV	S	V	T	D	4	2	2	-0.931776	-1.05475	NA	-0.121606	0.353316	STYX	-0.993261	0.0168197	0.115855	0.859673	NR
ANK1_830	sp|Q02357|ANK1_MOUSE	Q02357	830	1	DEGDELVGSKAERRDSRDVGEEKELLDFVPK	S	R	D	V	5	2	3	1.31634	-1.65498	1.99666	1.36379	-0.326207	STYX	-0.169321	0.960548	1.01141	0.147886	NR
ANK1_862	sp|Q02357|ANK1_MOUSE	Q02357	862	0.997	DQVVESPAIPRIPCVTPETVVIRSEDQEQAS	T	P	E	T	5	2	3	-0.243737	-0.692709	0.0540179	-0.0589205	-0.107662	STYX	-0.468223	0.072009	-0.0375216	0.757432	CENTER
ANK3_1406	sp|G5E8K5|ANK3_MOUSE	G5E8K5	1406	0.989	FKENRLPFSIKIRDTSQEPCGRLSFLKEPKT	S	Q	E	P	5	2	3	-0.14918	0.210387	-1.36102	-0.527385	-0.228908	STYQ	0.0306036	0.893588	-0.705769	0.0547535	CENTER
ANK3_1803	sp|G5E8K5|ANK3_MOUSE	G5E8K5	1803	1	TPSGSLESPAQARRLTGGLLDRLDDSSDQAR	T	G	G	L	5	2	3	-0.552577	-0.222243	-1.0325	-0.100076	-0.0175349	STYX	-0.38741	0.0940387	-0.38337	0.252358	CENTER
ANKAR_1381	sp|A2RT91|ANKAR_MOUSE	A2RT91	1381	0.996	KEHRQKTRPKIQPRDSLTLLPPVTNVKELFR	S	L	T	L	5	2	3	-0.132668	-0.235691	0.792503	1.13402	1.14306	STYX	-0.18418	0.308322	1.0232	0.0157973	NR
ANKE1_726	sp|Q9D2J7|ANKE1_MOUSE	Q9D2J7	726	0.999	FTKKVDITFIPKRIWSPEATTAELIRKRELR	S	P	E	A	5	2	3	-0.566931	0.103836	0.677958	0.729453	0.694127	STYX	-0.231548	0.453199	0.700513	0.0541608	CENTER
ANKL2_895	sp|Q6P1H6|ANKL2_MOUSE	Q6P1H6	895	0.999	STVMCYSPSDRQSWPSPALKGKFTTELVDLD	S	P	A	L	5	2	3	-0.0234076	0.240729	0.370317	0.292596	0.13294	STYX	0.108661	0.566687	0.265284	0.441773	CENTER
ANKS3_225	sp|Q9CZK6|ANKS3_MOUSE	Q9CZK6	225	0.998	RQFGHMKIVALMETHSPVLPKSLYRSPEKYE	S	P	V	L	5	2	3	-0.0695876	0.0698388	-0.940786	-0.801404	-0.704469	STYX	0.000125565	0.967994	-0.815553	0.0165576	CENTER
ANKZ1_86	sp|Q80UU1|ANKZ1_MOUSE	Q80UU1	86	0.996	RTSCPGENTSSGGKVSPYSLEISEKLFCSAC	S	P	Y	S	5	2	3	-0.0452079	-0.0336891	-0.251628	-0.381284	-1.30781	STYX	-0.0394485	0.855455	-0.646905	0.0700289	CENTER
ANLN_182	sp|Q8K298|ANLN_MOUSE	Q8K298	182	0.987	SYFAPVPTEDKAASPSKPPISNASATPVGRR	S	K	P	P	5	2	3	0.487987	0.822761	0.508245	0.311487	-0.0201428	STYX	0.655374	0.0442549	0.26653	0.466878	CENTER
ANLN_293	sp|Q8K298|ANLN_MOUSE	Q8K298	293	0.996	GPLLSASVSSSVKASSPVTAATFITENREAQ	S	P	V	T	5	2	3	0.00107181	0.140982	0.162415	-0.216351	-0.194375	STYX	0.0710267	0.658459	-0.0827702	0.634972	CENTER
ANLN_359	sp|Q8K298|ANLN_MOUSE	Q8K298	359	1	NREVCLQSQSKDKLATPGGRGIKPFLERFGE	T	P	G	G	4	2	2	-0.0524065	0.26804	1.60844	NA	2.09904	STYX	0.107817	0.592411	1.85374	0.017975	NR
ANLN_96	sp|Q8K298|ANLN_MOUSE	Q8K298	96	0.997	PDLENTEPIDVAKPCSPMPAPRQAKPPAPAA	S	P	M	P	5	2	3	0.364767	0.779436	0.379914	0.212577	0.193145	STYX	0.572102	0.0601715	0.261879	0.447593	CENTER
ANMY1_346	sp|Q8C0W1|ANMY1_MOUSE	Q8C0W1	346	0.999	KSFHPNIAERTLLQESPKSLVTPKISFLLAD	S	P	K	S	5	2	3	0.166772	-0.0336491	0.324401	0.341454	1.398	STYX	0.0665614	0.690273	0.687951	0.112537	CENTER
ANPRA_525	sp|P18293|ANPRA_MOUSE	P18293	525	0.995	DLQPSSLERHLRSAGSRLTLSGRGSNYGSLL	S	R	L	T	4	2	2	-0.252044	0.272108	NA	0.0837133	-0.286016	STYX	0.0100319	0.996183	-0.101152	0.665743	CENTER
ANPRC_25 26 31	sp|P70180|ANPRC_MOUSE	P70180	25 26 31	0.856	SACVLLARVLLAGGASSGAGDTRPGSRRRAR ACVLLARVLLAGGASSGAGDTRPGSRRRARE ARVLLAGGASSGAGDTRPGSRRRAREALAAQ	S	S	G	A	4	2	2	-0.160075	-0.0243377	0.026182	NA	0.57753	STYX	-0.0922062	0.614696	0.301856	0.518689	CENTER
ANR11_1070	sp|E9Q4F7|ANR11_MOUSE	E9Q4F7	1070	1	GKEKHKDIHSKDRKASFDQLREKKEKVFSSI	S	F	D	Q	5	2	3	-0.43713	-0.202602	-0.457266	-0.188871	-1.37272	STYX	-0.319866	0.126531	-0.672952	0.0690714	CENTER
ANR11_1676	sp|E9Q4F7|ANR11_MOUSE	E9Q4F7	1676	1	KDWLSGQPLKEVLPASPRTEQSRPTGVPTPT	S	P	R	T	4	2	2	-0.0965716	0.31959	NA	-0.267732	0.250144	STYX	0.111509	0.635496	-0.0087939	0.868007	CENTER
ANR11_276	sp|E9Q4F7|ANR11_MOUSE	E9Q4F7	276	0.959	QQSNRKGETPLKVANSPTMVNLLLGKGTYTS	S	P	T	M	5	2	3	-0.14777	0.357708	-0.0899209	-0.176993	-0.0459376	STYX	0.104969	0.710118	-0.104284	0.579078	CENTER
ANR17_15	sp|Q99NH0|ANR17_MOUSE	Q99NH0	15	0.999	_MEKATVPAAAEGEGSPPAAAAVAAPPAAAA	S	P	P	A	5	2	3	-0.576582	-0.289384	-0.0527506	-0.324831	-0.160605	STYX	-0.432983	0.0672481	-0.179396	0.412655	CENTER
ANR17_2041	sp|Q99NH0|ANR17_MOUSE	Q99NH0	2041	0.996	PMPTAKEHYPVSSPSSPSPPAQPGGVSRNSP	S	P	S	P	4	2	2	-0.207774	-0.00718209	NA	0.0145487	-0.0400569	STYX	-0.107478	0.567754	-0.0127541	0.85961	CENTER
ANR17_2063	sp|Q99NH0|ANR17_MOUSE	Q99NH0	2063	0.998	PGGVSRNSPLDCGSASPNKGASASEQEASSP	S	P	N	K	4	2	2	0.0732316	0.222702	-0.352797	0.257871	NA	STYX	0.147967	0.41075	-0.0474631	0.790975	CENTER
ANR17_2401	sp|Q99NH0|ANR17_MOUSE	Q99NH0	2401	0.999	NESPAQSVSSGVRAPSPAPSSVPLGSEKPSS	S	P	A	P	5	2	3	0.0854632	0.0778207	-0.116124	-0.192735	-0.114004	STYX	0.0816419	0.60139	-0.140955	0.490443	CENTER
ANR28_1011	sp|Q505D1|ANR28_MOUSE	Q505D1	1011	0.996	TFNAINRYTNTSKTVSFEALPIMRNEASSYC	S	F	E	A	5	2	3	-0.572851	-0.103194	-0.139777	-0.501969	-0.364802	STYX	-0.338023	0.172232	-0.335516	0.187613	CENTER
ANR42_507	sp|Q3V096|ANR42_MOUSE	Q3V096	507	1	SCESSKEKRRVKKKVSPGGVFVRSYQRIRTS	S	P	G	G	5	2	3	-0.342808	0.101042	1.38251	0.898773	1.16828	STYX	-0.120883	0.595917	1.14985	0.0110134	NR
ANR45_233	sp|Q810N6|ANR45_MOUSE	Q810N6	233	1	ISEIFEQKQQLEDIVSPILAKMSTPRHFAAS	S	P	I	L	5	2	3	0.0105674	-0.207289	0.841256	0.701552	1.09208	STYX	-0.0983608	0.604135	0.878295	0.027052	NR
ANS1A_642	sp|P59672|ANS1A_MOUSE	P59672	642	0.994	SKPKAELKLSRSLSKSDSDLLTCSPTEDATM	S	D	S	D	5	2	3	-0.177583	-0.156722	-0.405079	-0.214776	-0.449316	STYX	-0.167153	0.343668	-0.35639	0.159162	CENTER
ANS1A_663	sp|P59672|ANS1A_MOUSE	P59672	663	0.995	TCSPTEDATMGSRSESLSNCSIGKKRLEKSP	S	L	S	N	5	2	3	0.05207	0.0273924	-0.581275	-0.588638	-0.944162	STYX	0.0397312	0.778379	-0.704692	0.0278758	CENTER
ANS1A_679	sp|P59672|ANS1A_MOUSE	P59672	679	0.996	LSNCSIGKKRLEKSPSFASEWDEIEKIMSSI	S	F	A	S	5	2	3	-0.329396	0.0461079	-0.38307	-0.889031	-0.462958	STYX	-0.141644	0.509365	-0.578353	0.0560393	CENTER
ANS1A_692 693	sp|P59672|ANS1A_MOUSE	P59672	692 693	0.899	SPSFASEWDEIEKIMSSIGEGIDFSQEQQKI PSFASEWDEIEKIMSSIGEGIDFSQEQQKIS	S	S	I	G	5	2	3	-0.137161	-0.101582	-0.263284	-0.968527	-0.696672	STYX	-0.119372	0.498948	-0.642827	0.0473032	CENTER
ANS1A_903	sp|P59672|ANS1A_MOUSE	P59672	903	0.999	DLLLPSADTSRRRHDSLPDPGTASRADRFRV	S	L	P	D	5	2	3	0.0978387	-0.049428	-0.429225	-0.373751	-0.428557	STYX	0.0242054	0.855897	-0.410511	0.114285	CENTER
ANX11_451	sp|P97384|ANX11_MOUSE	P97384	451	0.996	ERLNKAMRGAGTKDRTLIRIMVSRSELDLLD	T	L	I	R	5	2	3	0.958315	0.181186	-0.451565	-0.911503	-0.107014	STYX	0.56975	0.10427	-0.490027	0.109757	CENTER
AP2A1_655	sp|P17426|AP2A1_MOUSE	P17426	655	0.998	INGGVEPTPSTVSTPSPSADLLGLRAAPPPA	S	P	S	A	5	2	3	-0.185258	-0.251773	-0.0193537	-0.29024	-0.0588154	STYX	-0.218516	0.231339	-0.122803	0.538649	CENTER
AP2A1_836	sp|P17426|AP2A1_MOUSE	P17426	836	0.998	QVQQVLNIECLRDFLTPPLLSVRFRYGGTAQ	T	P	P	L	4	2	2	-0.860374	-0.153923	0.115367	0.367635	NA	STYX	-0.507149	0.104968	0.241501	0.580197	CENTER
AP3B1_276	sp|Q9Z1T1|AP3B1_MOUSE	Q9Z1T1	276	0.998	REDGGLEDNEKNFYESEEEEEEKEKSSRKKS	S	E	E	E	5	2	3	0.40254	-0.218182	-0.578054	-0.308149	0.4129	STYX	0.092179	0.804566	-0.157768	0.495738	CENTER
AP3D1_760	sp|O54774|AP3D1_MOUSE	O54774	760	0.999	KKEKGKRRHSSLPTESDEDIAPAQRVDIITE	S	D	E	D	5	2	3	-0.3111	0.16949	-0.10798	0.111625	0.116895	STYX	-0.0708051	0.752612	0.04018	0.983339	CENTER
AP3D1_784	sp|O54774|AP3D1_MOUSE	O54774	784	0.999	RVDIITEEMPENALPSDEDDKDPNDPYRALD	S	D	E	D	5	2	3	-0.0268256	-0.406255	0.0886916	-0.109373	0.259346	STYX	-0.21654	0.32204	0.0795548	0.905402	CENTER
AP4AT_305	sp|Q3U3N6|AP4AT_MOUSE	Q3U3N6	305	1	GTSREPGDLAERAEATPPNDCQQELNLVRTV	T	P	P	N	5	2	3	-0.395125	-0.167925	-0.629508	-0.480564	-0.785088	STYX	-0.281525	0.162709	-0.63172	0.0378189	CENTER
AP4AT_400	sp|Q3U3N6|AP4AT_MOUSE	Q3U3N6	400	0.999	VLLLCRQQLQELGAGSPGPVTNKATKILRHF	S	P	G	P	5	2	3	-0.0249338	0.00788733	-0.247172	-0.152032	-0.264268	STYX	-0.00852324	0.998069	-0.221157	0.327798	CENTER
AP4E1_675	sp|Q80V94|AP4E1_MOUSE	Q80V94	675	0.999	PYGLSFSSSGFTGRQSPAGISLGSDISGNSA	S	P	A	G	4	2	2	-0.0232025	-0.0944291	-0.0410042	0.306696	NA	STYX	-0.0588158	0.759886	0.132846	0.8076	CENTER
AP4E1_962	sp|Q80V94|AP4E1_MOUSE	Q80V94	962	0.994	FPVENFKIIEQPECSSPVIETERTKSFQYSV	S	P	V	I	5	2	3	0.0132836	-0.266637	-0.196698	-0.525486	-0.382253	STYX	-0.126677	0.517562	-0.368146	0.154534	CENTER
APBA1_309	sp|B2RUJ5|APBA1_MOUSE	B2RUJ5	309	0.999	AEDMPEAEQDLERAPTPGGGHPDSPGLPAPA	T	P	G	G	4	2	2	0.157283	0.0759994	0.414506	0.590508	NA	STYX	0.116641	0.486105	0.502507	0.234018	CENTER
APBA1_317	sp|B2RUJ5|APBA1_MOUSE	B2RUJ5	317	0.999	QDLERAPTPGGGHPDSPGLPAPAGQQQRVVG	S	P	G	L	5	2	3	-0.00377503	0.321667	0.340434	0.472287	0.0507053	STYX	0.158946	0.448738	0.287809	0.418024	CENTER
APBA1_333	sp|B2RUJ5|APBA1_MOUSE	B2RUJ5	333	0.999	PGLPAPAGQQQRVVGTPGGSEVGQRYSKEKR	T	P	G	G	4	2	2	-0.081325	0.300431	NA	-0.137218	0.136753	STYX	0.109553	0.622471	-0.00023225	0.889667	CENTER
APC_1040	sp|Q61315|APC_MOUSE	Q61315	1040	0.998	YSLKYSDEQLNSGRQSPSQNERWARPKHVIE	S	P	S	Q	5	2	3	-0.656553	0.224558	-0.336055	-0.761906	-0.242018	STYX	-0.215998	0.5928	-0.44666	0.113685	CENTER
APC_1437	sp|Q61315|APC_MOUSE	Q61315	1437	0.999	LPDSPGQTMPPSRSKTPPPPPQTVQAKREVP	T	P	P	P	5	2	3	0.00486995	0.129061	-0.632805	-0.943584	-1.19541	STYX	0.0669654	0.670885	-0.923932	0.012802	NR
APC_2260	sp|Q61315|APC_MOUSE	Q61315	2260	0.996	PVSKKGPPLKTPASKSPSEGPGATTSPRGTK	S	P	S	E	5	2	3	-0.353079	0.00503736	-0.901322	-1.48419	-0.270158	STYX	-0.174021	0.410622	-0.885225	0.0281567	NR
APC_2270	sp|Q61315|APC_MOUSE	Q61315	2270	0.99	TPASKSPSEGPGATTSPRGTKPAGKSELSPI	S	P	R	G	5	2	3	-0.152567	-0.0631252	-0.92677	-0.846295	-0.991984	STYX	-0.107846	0.548915	-0.921683	0.0109803	NR
APC_2449	sp|Q61315|APC_MOUSE	Q61315	2449	0.996	RPALVRQSTFIKEAPSPTLRRKLEESASFES	S	P	T	L	5	2	3	-0.203895	0.205165	-0.220253	-0.190969	-0.246249	STYX	0.000635	0.98873	-0.219157	0.329909	CENTER
APC_2713	sp|Q61315|APC_MOUSE	Q61315	2713	0.998	KDSKDTHGKQSVGSGSPVQTVGLETRLNSFV	S	P	V	Q	5	2	3	0.167561	-0.148068	-0.20162	-0.820292	-0.613728	STYX	0.00974645	0.961355	-0.545213	0.072309	CENTER
APC_2774	sp|Q61315|APC_MOUSE	Q61315	2774	0.994	AERTPFSSSSSSKHSSPSGTVAARVTPFNYN	S	P	S	G	5	2	3	-0.00610653	-0.0320354	-1.04565	-0.997775	-1.53482	STYX	-0.019071	0.951044	-1.19275	0.00609338	NR
APC1_688	sp|P53995|APC1_MOUSE	P53995	688	0.999	DRLAWTRSFDFEGSLSPVIAPKKARPSDTGS	S	P	V	I	5	2	3	-0.0504633	0.115127	0.0567068	-0.210708	0.192282	STYX	0.0323319	0.821857	0.01276	0.900676	CENTER
APC1_902	sp|P53995|APC1_MOUSE	P53995	902	0.984	CVSDETCQYLSKVTSTPQKPQAEQEENRFTF	T	P	Q	K	4	2	2	-0.0529161	0.154106	0.108097	0.365967	NA	STYX	0.0505951	0.755861	0.237032	0.588029	CENTER
APEH_187	sp|Q8R146|APEH_MOUSE	Q8R146	187	0.997	KAESFFQTKALDVSASDEEMARPKKPDQAIK	S	D	E	E	5	2	3	-0.457153	0.131322	0.0175003	0.181034	0.171055	STYX	-0.162915	0.551996	0.123196	0.776206	CENTER
APEX1_18	sp|P28352|APEX1_MOUSE	P28352	18	1	KRGKKAAADDGEEPKSEPETKKSKGAAKKTE	S	E	P	E	5	2	3	0.671687	-0.0979217	-0.836891	-0.530646	-0.754838	STYX	0.286883	0.446315	-0.707458	0.026907	CENTER
APLF_149	sp|Q9D842|APLF_MOUSE	Q9D842	149	0.999	VNLPDKTTGASQLQGSPEITKTKCPTIDPMS	S	P	E	I	5	2	3	0.1767	0.280442	-0.167155	0.264634	0.00536283	STYX	0.228571	0.238166	0.0342805	0.962112	CENTER
APTX_112	sp|Q7TQC5|APTX_MOUSE	Q7TQC5	112	0.998	NGLYPYIVEFEEVAESPNLTQRKRKRSDCDS	S	P	N	L	4	2	2	-0.638392	-0.173614	NA	0.0682426	1.00583	STYX	-0.406003	0.108488	0.537038	0.306023	CENTER
APTX_150	sp|Q7TQC5|APTX_MOUSE	Q7TQC5	150	0.994	GTGLAPGSSPSQCSVSPKKDKNGATKKESLG	S	P	K	K	4	2	2	0.108196	-0.135222	0.250362	0.525064	NA	STYX	-0.0135131	0.956602	0.387713	0.355557	CENTER
AR13B_328	sp|Q640N2|AR13B_MOUSE	Q640N2	328	0.999	RVVDSYREALSQQLDSEDEQDQRGSESGENS	S	E	D	E	5	2	3	0.116266	-0.116793	0.340292	0.276927	0.733797	STYX	-0.00026355	0.981906	0.450339	0.201363	CENTER
AR6P4_50	sp|Q9JM93|AR6P4_MOUSE	Q9JM93	50	0.989	SRNCSASRSQGHKAGSASGVEERSKHKAQRT	S	A	S	G	5	2	3	0.353425	-0.160144	-0.188615	0.244377	-0.00758742	STYX	0.0966406	0.741359	0.0160582	0.908883	CENTER
AR6P6_80	sp|Q8BH07|AR6P6_MOUSE	Q8BH07	80	1	SETKRAPLLPRVGDGSPVLPDKRNGIFPATA	S	P	V	L	5	2	3	0.250515	0.133616	0.215592	0.365799	0.288458	STYX	0.192066	0.301584	0.28995	0.391193	CENTER
ARAF_212 213 214 215	sp|P04627|ARAF_MOUSE	P04627	212 213 214 215	0.866	FSFPAPANPPLQRIRSTSTPNVHMVSTTAPM SFPAPANPPLQRIRSTSTPNVHMVSTTAPMD FPAPANPPLQRIRSTSTPNVHMVSTTAPMDS PAPANPPLQRIRSTSTPNVHMVSTTAPMDSS	S	T	S	T	5	2	3	0.0749862	-0.123092	0.221337	-0.383726	-0.0986436	STYX	-0.0240529	0.915252	-0.0870108	0.639794	CENTER
ARAF_214	sp|P04627|ARAF_MOUSE,sp|Q99N57|RAF1_MOUSE	P04627	214	0.989	FPAPANPPLQRIRSTSTPNVHMVSTTAPMDS	S	T	P	N	5	2	3	0.188631	-0.0992348	-1.08743	-0.475855	0.474582	STYX	0.0446981	0.81032	-0.362903	0.305929	CENTER
ARAF_215	sp|P04627|ARAF_MOUSE	P04627	215	0.994	PAPANPPLQRIRSTSTPNVHMVSTTAPMDSS	T	P	N	V	4	2	2	0.126862	-0.316792	NA	-0.471341	0.0966217	STYX	-0.0949649	0.676226	-0.18736	0.525685	CENTER
ARAF_255	sp|P04627|ARAF_MOUSE	P04627	255	0.997	STDAAGRGGDGAPRGSPSPASVSSGRKSPHS	S	P	S	P	5	2	3	0.109426	-0.296094	-0.573792	-0.67906	-0.366093	STYX	-0.0933341	0.668343	-0.539648	0.0607482	CENTER
ARAF_580	sp|P04627|ARAF_MOUSE,sp|Q99N57|RAF1_MOUSE	P04627	580	0.997	IELLQRSLPKIERSASEPSLHRTQADELPAC	S	E	P	S	5	2	3	-0.37311	0.677579	-0.1461	-0.101552	-0.311242	STYX	0.152234	0.88194	-0.186298	0.396722	CENTER
ARFG1_135	sp|Q9EPJ9|ARFG1_MOUSE	Q9EPJ9	135	0.999	EGKEWSLESSPAQNWTPPQPKTLQFTAHRAS	T	P	P	Q	5	2	3	0.00218287	0.0747403	0.251791	-0.445794	0.288514	STYX	0.0384616	0.786245	0.0315039	0.980305	CENTER
ARFG1_342	sp|Q9EPJ9|ARFG1_MOUSE	Q9EPJ9	342	0.987	SFWETFGSAEPPKAKSPSSDSWTCADASTGR	S	P	S	S	4	2	2	-0.17619	-0.109277	0.0540444	NA	0.0916863	STYX	-0.142734	0.422566	0.0728654	0.933345	CENTER
ARFG2_145	sp|Q99K28|ARFG2_MOUSE	Q99K28	145	0.998	GTDLWIDSMNSAPSHSPEKKDSDFFTEHTQA	S	P	E	K	4	2	2	-0.367787	-0.363917	NA	0.226242	0.0344986	STYX	-0.365852	0.0787892	0.13037	0.802131	CENTER
ARFG2_339	sp|Q99K28|ARFG2_MOUSE	Q99K28	339	0.999	QMIEQETPLSAKSSRSQLDLFDDVGTFASGP	S	Q	L	D	5	2	3	-0.351368	-0.443892	-0.720234	-0.886185	-0.336853	STYQ	-0.39763	0.0668451	-0.647758	0.041048	CENTER
ARFG2_431 432	sp|Q99K28|ARFG2_MOUSE	Q99K28	431 432	0.898	ESSEARQKFAGAKAISSDMFFGREVDSEYEA SSEARQKFAGAKAISSDMFFGREVDSEYEAR	S	S	D	M	5	2	3	-0.196057	0.0328637	-0.387485	-1.06236	-0.534063	STYX	-0.0815967	0.671541	-0.661302	0.0419321	CENTER
ARFG3_241	sp|Q9D8S3|ARFG3_MOUSE	Q9D8S3	241	0.994	GAKKGSLGAQKLTNTSFTEIEKQAQAVDKRK	S	F	T	E	5	2	3	0.132255	0.518744	0.0316813	-0.234219	-0.188769	STYX	0.3255	0.17876	-0.130435	0.516581	CENTER
ARFG3_331	sp|Q9D8S3|ARFG3_MOUSE	Q9D8S3	331	0.998	ISHSVTSDMQTIEQESPTLAKPRRKYQEDPE	S	P	T	L	5	2	3	0.200806	0.133254	0.350399	0.0961664	0.696649	STYX	0.16703	0.347467	0.381072	0.293434	CENTER
ARGL1_74 75	sp|Q3UL36|ARGL1_MOUSE	Q3UL36	74 75	0.899	RSTNAAASRRERERASSPPDRIDIFGRTVSK STNAAASRRERERASSPPDRIDIFGRTVSKR	S	S	P	P	5	2	3	-0.16032	0.484156	0.349017	-0.00551789	-0.051005	STYX	0.161918	0.644673	0.0974982	0.870079	CENTER
ARGL1_75	sp|Q3UL36|ARGL1_MOUSE	Q3UL36	75	1	STNAAASRRERERASSPPDRIDIFGRTVSKR	S	P	P	D	5	2	3	-0.192738	0.379418	0.70607	0.00222822	-0.0681458	STYX	0.09334	0.774842	0.213384	0.650569	CENTER
ARH_198	sp|Q8C142|ARH_MOUSE	Q8C142	198	0.995	KANQEGGDVPGTRRDSTPSLKTLVATGNLLD	S	T	P	S	5	2	3	-0.191827	-0.0684923	-1.01553	-1.17737	-0.385143	STYX	-0.13016	0.473165	-0.859348	0.0207812	NR
ARH40_1485	sp|Q3UPH7|ARH40_MOUSE	Q3UPH7	1485	0.998	DVSPGPRNSPSLQPPSPGSSTPALTSGGILG	S	P	G	S	5	2	3	-0.91033	-0.456679	-0.202199	-0.389136	-0.41013	STYX	-0.683504	0.0296232	-0.333822	0.179745	CENTER
ARHG2_163	sp|Q60875|ARHG2_MOUSE	Q60875	163	0.999	KSVSTTNIAGHFNDESPLGLRQILSQSTDSL	S	P	L	G	4	2	2	-0.297276	0.173035	NA	0.115618	0.857824	STYX	-0.0621208	0.779588	0.486721	0.312789	CENTER
ARHG2_174	sp|Q60875|ARHG2_MOUSE	Q60875	174	0.991	FNDESPLGLRQILSQSTDSLNMRNRTLSVES	S	T	D	S	4	2	2	-0.0595859	-0.0994281	0.170041	NA	0.215504	STYX	-0.079507	0.667197	0.192772	0.662477	CENTER
ARHG2_885	sp|Q60875|ARHG2_MOUSE	Q60875	885	0.999	AEAPWARRPLDPRRRSLPAGDALYLSFNPPQ	S	L	P	A	5	2	3	-0.0359548	-0.162956	-0.0760043	-0.384972	-0.19627	STYX	-0.0994551	0.585659	-0.219082	0.34186	CENTER
ARHG2_931	sp|Q60875|ARHG2_MOUSE	Q60875	931	1	SLHRPFDDREAQELGSPEDRLQDSSDPDTGS	S	P	E	D	5	2	3	0.313348	-0.00231869	-0.219829	0.424011	0.74783	STYX	0.155515	0.452928	0.317337	0.444189	CENTER
ARHG2_955	sp|Q60875|ARHG2_MOUSE	Q60875	955	0.997	SDPDTGSEEEVSSRLSPPHSPRDFTRMQDIP	S	P	P	H	5	2	3	-0.366726	0.0386528	0.27999	0.799783	0.648783	STYX	-0.164037	0.458845	0.576186	0.111988	CENTER
ARHG5_593	sp|E9Q7D5|ARHG5_MOUSE	E9Q7D5	593	0.998	PLSSYTGVTQHLRSNSFPGSHRTEQTPDSLG	S	F	P	G	5	2	3	-0.200878	0.152176	-0.134328	0.295459	-0.215366	STYX	-0.0243514	0.906863	-0.0180784	0.803773	CENTER
ARHG6_224	sp|Q8K4I3|ARHG6_MOUSE	Q8K4I3	224	0.999	PSNYVREIKPSERPLSPKAIKGFDTAPLTKN	S	P	K	A	5	2	3	-0.350289	0.152609	-0.569694	-0.594395	-0.635642	STYX	-0.0988401	0.678285	-0.59991	0.0416553	CENTER
ARHG6_487	sp|Q8K4I3|ARHG6_MOUSE	Q8K4I3	487	0.999	LFSSVLIMLSASPRMSGFMYQGKIPIAGMVV	S	G	F	M	4	2	2	-0.142319	-0.0673917	-0.912574	-0.666556	NA	STYX	-0.104856	0.557426	-0.789565	0.0546905	CENTER
ARHG6_639	sp|Q8K4I3|ARHG6_MOUSE	Q8K4I3	639	0.998	TMKKFLHKRKTERKASEEEYVIRKSTAALEE	S	E	E	E	5	2	3	-0.609282	0.0676647	0.132365	0.0350911	0.353818	STYX	-0.270809	0.380094	0.173758	0.655866	CENTER
ARHG6_765	sp|Q8K4I3|ARHG6_MOUSE	Q8K4I3	765	0.983	KLLKQTDECIRSESSSKTSILQ_________	S	K	T	S	5	2	3	-0.818834	-0.0545783	0.918874	0.306834	0.834174	STYX	-0.436706	0.189653	0.686627	0.0718213	CENTER
ARHG7_228	sp|Q9ES28|ARHG7_MOUSE	Q9ES28	228	0.999	PSNYVREIKPSEKPVSPKSGTLKSPPKGFDT	S	P	K	S	5	2	3	0.89259	0.469574	0.303497	0.445629	0.216204	STYX	0.681082	0.0439589	0.321777	0.342726	CENTER
ARHG7_497	sp|Q9ES28|ARHG7_MOUSE	Q9ES28	497	0.999	LFPNLLLMLSASPRMSGFIYQGKLPTTGMTI	S	G	F	I	5	2	3	-0.12261	0.0407054	-0.206902	-0.351054	0.560465	STYX	-0.0409522	0.839235	0.0008363	0.806209	CENTER
ARHG7_655	sp|Q9ES28|ARHG7_MOUSE	Q9ES28	655	0.998	LRPSAALCYKEDLSKSPKTMKKLLPKRKPER	S	P	K	T	5	2	3	1.07201	-0.16938	0.307082	0.189432	0.526629	STYX	0.451313	0.506768	0.341048	0.321613	CENTER
ARHG7_673	sp|Q9ES28|ARHG7_MOUSE	Q9ES28	673	1	TMKKLLPKRKPERKPSDEEFAVRKSTAALEE	S	D	E	E	5	2	3	-0.419227	-0.108485	0.392122	0.444319	0.592306	STYX	-0.263856	0.209155	0.476249	0.164292	CENTER
ARHG7_776	sp|Q9ES28|ARHG7_MOUSE	Q9ES28	776	1	AHSYRMGSASRSRKESAPQVLLPEEEKIIVE	S	A	P	Q	5	2	3	-0.740571	0.0526689	-0.542082	-0.629514	-0.177772	STYX	-0.343951	0.32913	-0.449789	0.106733	CENTER
ARHG8_508	sp|Q9Z206|ARHG8_MOUSE	Q9Z206	508	0.999	FNCIRAAIAPFQRAASPLELQGLPDLHEECE	S	P	L	E	5	2	3	0.10622	0.160747	0.00236178	-0.095567	0.0787326	STYX	0.133483	0.431738	-0.00482418	0.854002	CENTER
ARHGC_309	sp|Q8R4H2|ARHGC_MOUSE	Q8R4H2	309	0.999	WSSGDASRPSSDSADSPKSSLRERSYLEEAP	S	P	K	S	4	2	2	0.141632	-0.182713	-0.459638	-1.44729	NA	STYX	-0.0205404	0.924902	-0.953463	0.0592851	NR
ARHGC_736	sp|Q8R4H2|ARHGC_MOUSE	Q8R4H2	736	1	VQEEECEVERVAEHGTPKPFRKFDSIAFGES	T	P	K	P	5	2	3	-0.434592	0.0136251	-1.21024	-1.21821	-1.23977	STYX	-0.210483	0.367038	-1.22274	0.00501526	NR
ARHGH_414	sp|Q80U35|ARHGH_MOUSE	Q80U35	414	0.984	WSSRSSVGWGVYRSPSFGTGDGLLLRPQTRS	S	F	G	T	5	2	3	-0.400012	-0.0116364	-1.02421	-0.692949	-0.61792	STYX	-0.205824	0.348276	-0.778358	0.0205868	CENTER
ARI1A_1601	sp|A2BH40|ARI1A_MOUSE	A2BH40	1601	0.986	VSSPAPLPRPMENRTSPSKSPFLHSGMKMQK	S	P	S	K	5	2	3	-0.884785	0.913255	-0.0600875	-0.263466	-0.403156	STYX	0.0142347	0.942621	-0.242236	0.303458	CENTER
ARI1A_302	sp|A2BH40|ARI1A_MOUSE	A2BH40	302	0.991	TPQPTATPTLNQLLTSPSSARGYQGYPGGDY	S	P	S	S	5	2	3	0.159719	-0.134913	-0.044534	-0.477188	0.00273808	STYX	0.0124028	0.943696	-0.172995	0.451485	CENTER
ARI1A_382 383 384	sp|A2BH40|ARI1A_MOUSE	A2BH40	382 383 384	0.887	GSSGGGGQPLARTPQSSSPMDQMGKMRPQPY SSGGGGQPLARTPQSSSPMDQMGKMRPQPYG SGGGGQPLARTPQSSSPMDQMGKMRPQPYGG	S	S	S	P	5	2	3	0.170722	0.971658	-0.0453633	-0.00593126	0.267861	STYX	0.57119	0.108612	0.0721887	0.929076	CENTER
ARI1A_384	sp|A2BH40|ARI1A_MOUSE	A2BH40	384	0.995	SGGGGQPLARTPQSSSPMDQMGKMRPQPYGG	S	P	M	D	5	2	3	0.290294	-0.0912729	-0.266536	-0.109585	-0.229472	STYX	0.0995107	0.653986	-0.201864	0.363216	CENTER
ARI1A_697	sp|A2BH40|ARI1A_MOUSE	A2BH40	697	0.992	FSPHTSPHLPGIRGPSPSPVGSPASVAQSRS	S	P	S	P	5	2	3	0.0654723	-0.0136846	-0.0409719	-0.342954	-0.235314	STYX	0.0258939	0.843548	-0.206413	0.36042	CENTER
ARI1A_773	sp|A2BH40|ARI1A_MOUSE	A2BH40	773	0.994	PQMPQYTSPQPGSALSPRQPSGGQMHSGVGS	S	P	R	Q	5	2	3	0.39724	-0.0538469	-0.196413	-0.173353	-0.46746	STYX	0.171697	0.481256	-0.279075	0.251435	CENTER
ARI1B_1563	sp|E9Q4N7|ARI1B_MOUSE	E9Q4N7	1563	0.995	APSPASFQRSLESRMSPSKSPFLPTMKMQKV	S	P	S	K	5	2	3	-0.454001	0.316201	-0.687801	-0.818023	-1.13031	STYX	-0.0689002	0.805699	-0.87871	0.0141836	NR
ARI1B_1757	sp|E9Q4N7|ARI1B_MOUSE	E9Q4N7	1757	0.964	EEEEDSEKIESEGKSSPALAAPDASVDPKET	S	P	A	L	4	2	2	-0.0339685	-0.280987	-1.03111	-0.766541	NA	STYX	-0.157478	0.417699	-0.898827	0.0411969	NR
ARI1B_454	sp|E9Q4N7|ARI1B_MOUSE	E9Q4N7	454	0.999	SPAWAAAQQRSHPAMSPGTPGPTMGRSQGSP	S	P	G	T	5	2	3	-0.0450713	0.134001	-0.145362	-0.265635	-0.0669942	STYX	0.0444646	0.77088	-0.15933	0.451445	CENTER
ARI2_352	sp|Q9Z1K6|ARI2_MOUSE	Q9Z1K6	352	0.999	YECSRYKENPDIVNQSQQAQAREALKKYLFY	S	Q	Q	A	5	2	3	0.231426	1.03456	0.453046	0.351872	-0.157037	STYQ	0.632993	0.0822996	0.215961	0.583571	CENTER
ARI3A_339	sp|Q62431|ARI3A_MOUSE	Q62431	339	0.99	MKYLYPYECERRGLSSPNELQAAIDSNRREG	S	P	N	E	5	2	3	-0.274713	-0.225005	0.675533	-0.362623	0.802859	STYX	-0.249859	0.179963	0.371923	0.393879	CENTER
ARI3B_385 386	sp|Q9Z1N7|ARI3B_MOUSE	Q9Z1N7	385 386	0.895	RFSILGLGSSSGTSASSPRIPPASTLRKGDG FSILGLGSSSGTSASSPRIPPASTLRKGDGV	S	S	P	R	5	2	3	-0.024276	0.314312	0.262061	-0.0591729	0.90318	STYX	0.145018	0.490484	0.368689	0.374112	CENTER
ARI4A_867	sp|F8VPQ2|ARI4A_MOUSE	F8VPQ2	867	1	YEKEKKLKRKILGQQSPEKKLRLDNGMEMTT	S	P	E	K	5	2	3	0.129556	0.0833965	-0.643328	-0.846221	-1.12637	STYX	0.106476	0.512476	-0.871973	0.0147786	NR
ARI4B_675	sp|A2CG63|ARI4B_MOUSE	A2CG63	675	0.999	CKLRRLSKSPFQSNPSPEMVSKLDLADAKNS	S	P	E	M	5	2	3	0.279295	0.156046	-0.348177	-0.301254	-0.150567	STYX	0.21767	0.257125	-0.266666	0.259879	CENTER
ARI4B_839	sp|A2CG63|ARI4B_MOUSE	A2CG63	839	0.995	GKRRYCSADECLQTGSPGKKEDRTKSKEPLC	S	P	G	K	5	2	3	0.508282	0.174855	-0.143922	-0.0814361	-0.366339	STYX	0.341568	0.152844	-0.197232	0.382594	CENTER
ARI5B_1032	sp|Q8BM75|ARI5B_MOUSE	Q8BM75	1032	1	EDLDLVIAGKKARAVSPLDPAKEASGKEKAS	S	P	L	D	5	2	3	0.023877	-0.11043	-0.579812	-0.892773	-0.718882	STYX	-0.0432766	0.828781	-0.730489	0.0240086	CENTER
ARID2_631	sp|E9Q7E2|ARID2_MOUSE	E9Q7E2	631	0.997	PISTPVVRVDAVADLSPTPSPAGIPHGPQAA	S	P	T	P	5	2	3	-0.160669	-0.00552967	0.0412619	0.104145	-0.116199	STYX	-0.0830994	0.652281	0.00973572	0.895332	CENTER
ARIP4_1168	sp|Q99NG0|ARIP4_MOUSE	Q99NG0	1168	0.997	SSPKAPDPEGLARPVSPDSPEIISELQQYAD	S	P	D	S	4	2	2	-0.674705	-0.0864669	NA	-0.383391	0.267535	STYX	-0.380586	0.170435	-0.0579281	0.772661	CENTER
ARK72_40	sp|Q8CG76|ARK72_MOUSE	Q8CG76	40	0.996	GRPLAMSRPPPPRAASGAPLRPATVLGTMEM	S	G	A	P	5	2	3	-0.0655581	0.106196	-0.077642	-0.728957	-0.499276	STYX	0.0203192	0.877501	-0.435292	0.129632	CENTER
ARL3_46	sp|Q9WUL7|ARL3_MOUSE	Q9WUL7	46	0.996	TTLLKQLASEDISHITPTQGFNIKSVQSQGF	T	P	T	Q	5	2	3	-0.342638	0.0708252	0.843584	0.494916	0.761355	STYX	-0.135907	0.540692	0.699951	0.0579544	CENTER
ARL3_5	sp|Q9WUL7|ARL3_MOUSE	Q9WUL7	5	1	___________MGLLSILRKLKSAPDQEVRI	S	I	L	R	4	2	2	-0.651699	0.36742	NA	0.542504	0.953996	STYX	-0.14214	0.752868	0.74825	0.109379	CENTER
ARL3_58	sp|Q9WUL7|ARL3_MOUSE	Q9WUL7	58	0.998	SHITPTQGFNIKSVQSQGFKLNVWDIGGQRK	S	Q	G	F	4	2	2	-0.580319	0.27783	NA	0.745738	0.887934	STYQ	-0.151244	0.690937	0.816836	0.0810447	CENTER
ARM10_43	sp|Q9D0L7|ARM10_MOUSE	Q9D0L7	43	0.999	TRGPRRGGRRLRPSRSAEDLTDGSYDDILNA	S	A	E	D	5	2	3	-0.429507	-0.329316	-0.197082	-0.331707	0.0894563	STYX	-0.379411	0.0747752	-0.146444	0.487561	CENTER
ARM12_47	sp|Q80X86|ARM12_MOUSE	Q80X86	47	0.991	YKAVRTGLKCHPPLCSNSPICIARLAIERER	S	N	S	P	4	2	2	-0.0899821	-0.130786	-0.0978824	-0.509379	NA	STYX	-0.110384	0.5329	-0.303631	0.33335	CENTER
ARM12_49	sp|Q80X86|ARM12_MOUSE	Q80X86	49	0.993	AVRTGLKCHPPLCSNSPICIARLAIERERHG	S	P	I	C	4	2	2	0.0718478	0.0903298	0.305095	-0.502233	NA	STYX	0.0810888	0.604449	-0.0985687	0.711859	CENTER
ARMC3_649	sp|A2AU72|ARMC3_MOUSE	A2AU72	649	0.998	SLRRGSKEKANAIFGSPTEEKSEPASVRNTI	S	P	T	E	5	2	3	-0.365739	-0.0111921	0.468497	0.77071	0.441645	STYX	-0.188466	0.37462	0.560284	0.113028	CENTER
ARMC4_336	sp|B2RY50|ARMC4_MOUSE	B2RY50	336	0.998	DNQIFEKPKTEDGHSSVAGSEKSKIEKISFG	S	V	A	G	4	2	2	0.00674978	-0.232624	1.78408	NA	1.292	STYX	-0.112937	0.553426	1.53804	0.0223019	NR
ARMC4_353	sp|B2RY50|ARMC4_MOUSE	B2RY50	353	0.997	AGSEKSKIEKISFGKSPMTKRLEPSLNWRVT	S	P	M	T	5	2	3	-0.247329	-0.0126225	1.17046	1.04147	1.27853	STYX	-0.129976	0.49467	1.16349	0.00970762	NR
ARMC9_656	sp|Q9D2I5|ARMC9_MOUSE	Q9D2I5	656	1	ASVQWSGDEPLRRPVTPGGHRTGCPVLGDHL	T	P	G	G	5	2	3	0.845759	-0.258164	2.06517	1.33871	1.66969	STYX	0.293797	0.686793	1.69119	0.00443294	NR
ARMT1_4	sp|A6H630|ARMT1_MOUSE	A6H630	4	0.998	____________MAESPAFLSAKDEGSFAYL	S	P	A	F	4	2	2	0.800295	-0.0490454	0.794879	0.361795	NA	STYX	0.375625	0.335981	0.578337	0.193212	CENTER
ARMT1_41	sp|A6H630|ARMT1_MOUSE	A6H630	41	1	PQILTKVIDTLHRHKSEFFEKHGEEGIEAEK	S	E	F	F	5	2	3	-0.451722	0.155128	1.18339	1.21598	1.18945	STYX	-0.148297	0.592333	1.19627	0.00870283	NR
ARP10_414	sp|Q9QZB7|ARP10_MOUSE	Q9QZB7	414	0.97	FDVGKAQPPLMKRAFSTEK____________	S	T	E	K	5	2	3	0.0690597	0.429986	-0.494428	-0.574765	-0.500203	STYX	0.249523	0.272703	-0.523132	0.061637	CENTER
ARP10_414 415	sp|Q9QZB7|ARP10_MOUSE	Q9QZB7	414 415	0.858	FDVGKAQPPLMKRAFSTEK____________ DVGKAQPPLMKRAFSTEK_____________	S	T	E	K	5	2	3	0.0762802	0.152615	-0.210878	-0.850533	-0.634962	STYX	0.114448	0.49183	-0.565458	0.0660794	CENTER
ARP19_104	sp|P56212|ARP19_MOUSE	P56212	104	0.998	GDHIPTPQDLPQRKPSLVASKLAG_______	S	L	V	A	5	2	3	-0.448062	-0.298803	-1.03924	-1.06412	-0.0434206	STYX	-0.373433	0.0807045	-0.715595	0.0576171	CENTER
ARP5L_64	sp|Q9D898|ARP5L_MOUSE	Q9D898	64	0.998	RQGDMLRAFHAALRNSPINTKNQAVKERAQG	S	P	I	N	5	2	3	0.26847	0.241367	0.480727	0.370868	0.0383933	STYX	0.254918	0.198777	0.296663	0.403367	CENTER
ARP8_132	sp|Q8R2S9|ARP8_MOUSE	Q8R2S9	132	0.997	IWSKKMSNGTRRIPVSPEQTRSYNKQMRPAI	S	P	E	Q	5	2	3	0.044486	0.00261747	-0.0544281	0.0312329	-0.059544	STYX	0.0235518	0.85157	-0.0275797	0.785063	CENTER
ARPC5_77	sp|Q9CPW4|ARPC5_MOUSE	Q9CPW4	77	1	PPINTKSQAVKDRAGSIVLKVLISFKANDIE	S	I	V	L	5	2	3	-0.165548	0.129841	-0.297664	-0.406089	-0.365482	STYX	-0.0178534	0.935189	-0.356411	0.155639	CENTER
ARRB1_412	sp|Q8BWG8|ARRB1_MOUSE	Q8BWG8	412	0.997	KGMKDDKDEEDDGTGSPHLNNR_________	S	P	H	L	5	2	3	0.35345	-0.241455	-0.403139	-0.50615	0.0165804	STYX	0.0559979	0.895101	-0.29757	0.243422	CENTER
ARVC_643	sp|P98203|ARVC_MOUSE	P98203	643	1	FHQGKKDAEMDRNFDTLDLPKRTEAAKGFEL	T	L	D	L	5	2	3	-0.0403123	-0.161438	-0.661983	-0.617746	0.0190566	STYX	-0.100875	0.578866	-0.420224	0.14888	CENTER
ASAP1_1045	sp|Q9QWY8|ASAP1_MOUSE	Q9QWY8	1045	0.999	QPPSEVTQRSHTGDLSPNVQSRDAIQKQASE	S	P	N	V	5	2	3	-0.153872	-0.0305516	0.898095	0.776479	0.293264	STYX	-0.0922116	0.615171	0.655946	0.0814925	CENTER
ASAP1_1059	sp|Q9QWY8|ASAP1_MOUSE	Q9QWY8	1059	0.995	LSPNVQSRDAIQKQASEDSNDLTPTLPETPV	S	E	D	S	5	2	3	-0.469467	-0.194189	0.263302	-0.870872	-0.269494	STYX	-0.331828	0.123485	-0.292355	0.34226	CENTER
ASAP1_1072	sp|Q9QWY8|ASAP1_MOUSE	Q9QWY8	1072	0.998	QASEDSNDLTPTLPETPVPLPRKINTGKNKV	T	P	V	P	5	2	3	-0.207438	0.0152718	0.452025	0.00741328	0.491281	STYX	-0.096083	0.613826	0.316906	0.377753	CENTER
ASAP1_732	sp|Q9QWY8|ASAP1_MOUSE	Q9QWY8	732	0.999	HVEYEWNLRQDEMDESDDDLDDKPSPIKKER	S	D	D	D	5	2	3	0.0224245	-0.545272	0.126388	0.683319	1.05306	STYX	-0.261424	0.331815	0.620922	0.119799	CENTER
ASAP1_854	sp|Q9QWY8|ASAP1_MOUSE	Q9QWY8	854	0.993	KKRPPPPPPGHKRTLSDPPSPLPHGPPNKGA	S	D	P	P	5	2	3	-0.614189	0.327995	-0.0302886	0.0766638	-0.395264	STYX	-0.143097	0.728301	-0.116296	0.568493	CENTER
ASAP1_858	sp|Q9QWY8|ASAP1_MOUSE	Q9QWY8	858	0.999	PPPPPGHKRTLSDPPSPLPHGPPNKGAIPWG	S	P	L	P	5	2	3	-0.101415	-0.0435334	0.465928	0.143928	0.689847	STYX	-0.0724742	0.69717	0.433234	0.224468	CENTER
ASAP3_867	sp|Q5U464|ASAP3_MOUSE	Q5U464	867	0.99	ESTRSYRRGGRSLEDSPSARQPLCSRRHIPV	S	P	S	A	4	2	2	-0.0727724	-0.292921	0.575057	NA	0.650549	STYX	-0.182847	0.33802	0.612803	0.15709	CENTER
ASB3_35	sp|Q9WV72|ASB3_MOUSE	Q9WV72	35	1	EGNVKILRKLLKKGRSVDVADNRGWMPIHEA	S	V	D	V	5	2	3	0.272923	0.434127	0.614877	0.351085	0.589551	STYX	0.353525	0.120848	0.518504	0.136211	CENTER
ASCC1_63	sp|Q9D8Z1|ASCC1_MOUSE	Q9D8Z1	63	0.996	AYEVAQTPHGFRATVSAPSLLYKHIVGKRGD	S	A	P	S	5	2	3	-0.439562	0.425417	-0.114626	-0.118495	-0.138008	STYX	-0.0070724	0.918825	-0.12371	0.530367	CENTER
ASGL1_183	sp|Q8C0M9|ASGL1_MOUSE	Q8C0M9	183	1	EKLEKGAQNADCPKNSGTVGAVALDCRGNLA	S	G	T	V	5	2	3	0.661359	-1.07655	1.99729	1.62722	1.04102	STYX	-0.207597	0.864473	1.55517	0.00590741	NR
ASH1L_1678	sp|Q99MY8|ASH1L_MOUSE	Q99MY8	1678	0.991	ASDKPSQRSSESTNCSPTRKRSSSESTSSTV	S	P	T	R	5	2	3	1.09502	-0.312232	-0.331293	-0.388648	-0.892921	STYX	0.391394	0.725344	-0.53762	0.0729042	CENTER
ASH2L_618	sp|Q91X20|ASH2L_MOUSE	Q91X20	618	1	ADVLYHVETEVDGRRSPPWEP__________	S	P	P	W	5	2	3	-0.0715037	0.160142	-0.186511	-0.321529	0.638385	STYX	0.044319	0.792484	0.0434481	0.900001	CENTER
ASHWN_150	sp|Q922M7|ASHWN_MOUSE	Q922M7	150	0.999	TSDAFWKSPNSSSRISPLVLFSNLPVNHKME	S	P	L	V	4	2	2	0.513772	0.270788	0.231898	0.118075	NA	STYX	0.39228	0.105815	0.174986	0.700698	CENTER
ASHWN_230	sp|Q922M7|ASHWN_MOUSE	Q922M7	230	1	NHLKPPEVKRKIQHVTWP_____________	T	W	P	_	5	2	3	-0.265464	0.172993	0.249538	0.154923	0.610288	STYX	-0.0462354	0.824923	0.33825	0.339866	CENTER
ASPC1_193	sp|Q8VBT9|ASPC1_MOUSE	Q8VBT9	193	0.999	AGKQESIAVRSKAPGSPVSSLSADQASSSTL	S	P	V	S	5	2	3	-0.257561	-0.215205	0.205006	0.114796	0.325414	STYX	-0.236383	0.199368	0.215072	0.546646	CENTER
ASPC1_278 279	sp|Q8VBT9|ASPC1_MOUSE	Q8VBT9	278 279	0.894	GGQRLGGPSASLRPLTSPSANSSKSFSGPGG GQRLGGPSASLRPLTSPSANSSKSFSGPGGP	T	S	P	S	5	2	3	-0.0106096	0.128123	0.622826	0.36602	0.559785	STYX	0.0587566	0.705263	0.51621	0.136781	CENTER
ASPC1_279	sp|Q8VBT9|ASPC1_MOUSE	Q8VBT9	279	0.994	GQRLGGPSASLRPLTSPSANSSKSFSGPGGP	S	P	S	A	5	2	3	-0.211487	0.0187773	0.659645	0.700235	0.757633	STYX	-0.0963547	0.615092	0.705838	0.0531446	CENTER
ASPC1_496	sp|Q8VBT9|ASPC1_MOUSE	Q8VBT9	496	0.993	TADVLVARCMSRASGSPPLLPAPDPVSLESE	S	P	P	L	5	2	3	-0.125635	-0.238507	0.628397	0.384988	0.377443	STYX	-0.182071	0.314617	0.463609	0.17647	CENTER
ASPP1_669	sp|Q62415|ASPP1_MOUSE,sp|Q8CG79|ASPP2_MOUSE	Q62415	669	0.991	VPGEGSTVESLPRPLSPTKLTPIVHSPLRYQ	S	P	T	K	4	2	2	-0.587974	0.178995	-0.0372363	NA	0.296181	STYX	-0.204489	0.556368	0.129472	0.81339	CENTER
ASPP1_679	sp|Q62415|ASPP1_MOUSE	Q62415	679	0.999	LPRPLSPTKLTPIVHSPLRYQSDADLEALRR	S	P	L	R	5	2	3	-0.187345	-0.0721723	0.808079	0.0539477	0.10774	STYX	-0.129759	0.471708	0.323256	0.424574	CENTER
ASTRA_12	sp|Q8VEF1|ASTRA_MOUSE	Q8VEF1	12	0.982	____MFDTTPHSGRSSPSSSPSLRKRLQLLP	S	P	S	S	5	2	3	0.296337	-0.0154929	-0.321301	-0.528138	-0.222986	STYX	0.140422	0.490271	-0.357475	0.162549	CENTER
ASTRA_279	sp|Q8VEF1|ASTRA_MOUSE	Q8VEF1	279	0.992	HSQEPSPVGSRRGRVTPNLSRASSDADHGAE	T	P	N	L	5	2	3	0.859841	-0.538997	-0.510705	-0.56556	-0.296571	STYX	0.160422	0.964854	-0.457612	0.0927664	CENTER
ASTRB_274	sp|Q80TI0|ASTRB_MOUSE	Q80TI0	274	0.999	NDSSSKSSIETKPDASPQLPKKSITNSTLTS	S	P	Q	L	5	2	3	0.20534	-0.00160172	-0.568554	-0.461628	-0.61757	STYX	0.101869	0.570045	-0.549251	0.0545965	CENTER
ASTRB_550	sp|Q80TI0|ASTRB_MOUSE	Q80TI0	550	0.999	LTKTESTYLAEIHRQSPKEKASKSSAVRRRK	S	P	K	E	5	2	3	0.128	0.235604	-0.116295	-0.389462	-0.338888	STYX	0.181802	0.321161	-0.281548	0.244085	CENTER
ASTRB_56	sp|Q80TI0|ASTRB_MOUSE	Q80TI0	56	0.984	MVEKGSDHSSDKSPSTPEQGVQRSCSSQSGR	T	P	E	Q	4	2	2	0.510289	0.0177786	-0.599682	0.49459	NA	STYX	0.264034	0.307948	-0.052546	0.811085	CENTER
ASXL1_500	sp|P59598|ASXL1_MOUSE	P59598	500	0.876	SQIQAERDNLACASASPDRIPTLPQDTVDQE	S	P	D	R	5	2	3	-0.0250741	-0.132804	-0.160085	-0.482618	-0.276909	STYX	-0.0789392	0.669409	-0.306537	0.217077	CENTER
ASXL2_1254	sp|Q8BZ32|ASXL2_MOUSE	Q8BZ32	1254	0.989	QPLLLPPLQTPKLYGSPTQIGPSYRGMINVS	S	P	T	Q	5	2	3	-0.174455	0.462757	-0.180401	-0.246639	-0.511893	STYX	0.144151	0.681337	-0.312978	0.211153	CENTER
ASXL2_653	sp|Q8BZ32|ASXL2_MOUSE	Q8BZ32	653	1	SVGGTIPGPGPGGGQSPREGGERKIAGGGSA	S	P	R	E	5	2	3	-1.1367	0.350465	0.0694646	-0.284936	-0.246541	STYX	-0.393115	0.673759	-0.154004	0.468687	CENTER
AT11C_1105	sp|Q9QZW0|AT11C_MOUSE	Q9QZW0	1105	0.995	VRRRSARRNLSCRRASDSLSARPSVRPLLLR	S	D	S	L	5	2	3	-0.0462499	-0.298502	-0.468503	-0.850283	0.276522	STYX	-0.172376	0.378873	-0.347421	0.261157	CENTER
AT131_22	sp|Q9EPE9|AT131_MOUSE	Q9EPE9	22	0.995	AVPCGARPGGARDNGSPQPGSRLRPGLAAGP	S	P	Q	P	4	2	2	0.774945	0.0285221	0.249413	NA	0.286969	STYX	0.401733	0.236379	0.268191	0.51635	CENTER
AT131_896	sp|Q9EPE9|AT131_MOUSE	Q9EPE9	896	0.999	NAPERVVERRRRPRDSPVLSNSGPRVSRSTK	S	P	V	L	5	2	3	-0.0518354	0.191763	-0.141977	-0.484677	-0.220716	STYX	0.0699635	0.693511	-0.282457	0.248681	CENTER
AT133_813	sp|Q5XF89|AT133_MOUSE	Q5XF89	813	0.998	SAIDSEAIPIKLAHDSLEDLEVTRYHFAMNG	S	L	E	D	5	2	3	-0.199427	0.182073	-0.320398	-0.237649	0.21476	STYX	-0.0086771	0.960369	-0.114429	0.560826	CENTER
AT2A2_441	sp|O55143|AT2A2_MOUSE,sp|Q64518|AT2A3_MOUSE	O55143	441	0.997	DYNEAKGVYEKVGEATETALTCLVEKMNVFD	T	E	T	A	5	2	3	0.00111207	-0.00204527	0.128157	-0.0912982	0.335133	STYX	-0.000466601	0.966379	0.123997	0.787837	CENTER
AT2A2_663	sp|O55143|AT2A2_MOUSE	O55143	663	0.997	TSKAFTGREFDELSPSAQRDACLNARCFARV	S	A	Q	R	5	2	3	-0.499884	0.0352652	-0.576191	-0.423131	-0.247223	STYX	-0.232309	0.369855	-0.415515	0.118928	CENTER
AT2B1_1139 1140	sp|G5E829|AT2B1_MOUSE	G5E829	1139 1140	0.897	FRSSLYEGLEKPESRSSIHNFMTHPEFRIED RSSLYEGLEKPESRSSIHNFMTHPEFRIEDS	S	S	I	H	5	2	3	-0.173754	-0.0044266	-0.351939	-0.282981	-0.254184	STYX	-0.0890905	0.631808	-0.296368	0.217835	CENTER
AT2B1_1140	sp|G5E829|AT2B1_MOUSE	G5E829	1140	0.975	RSSLYEGLEKPESRSSIHNFMTHPEFRIEDS	S	I	H	N	5	2	3	-0.613528	0.144421	0.0514051	-0.534496	-0.0747768	STYX	-0.234554	0.497591	-0.185956	0.43917	CENTER
AT2B1_1177	sp|G5E829|AT2B1_MOUSE	G5E829	1177	0.996	IDDTDAEDDAPTKRNSSPPPSPNKNNNAVDS	S	S	P	P	4	2	2	0.259924	-0.0802651	0.0197996	-0.603677	NA	STYX	0.0898294	0.666869	-0.291939	0.382034	CENTER
AT2B1_1178	sp|G5E829|AT2B1_MOUSE	G5E829	1178	0.993	DDTDAEDDAPTKRNSSPPPSPNKNNNAVDSG	S	P	P	P	5	2	3	0.436354	0.0681742	-0.572977	-0.486229	-0.421769	STYX	0.252264	0.271033	-0.493658	0.073051	CENTER
AT2B1_1211	sp|G5E829|AT2B1_MOUSE,sp|Q9R0K7|AT2B2_MOUSE	G5E829	1211	0.998	LTIEMNKSATSSSPGSPLHSLETSL______	S	P	L	H	5	2	3	0.159295	-0.070721	0.0615365	-0.219602	-0.193157	STYX	0.0442871	0.791703	-0.117074	0.548349	CENTER
AT2B4_1065	sp|Q6Q477|AT2B4_MOUSE	Q6Q477	1065	0.969	IPTKSLKFLKEAGHGSDKEDISRDTEGMDEI	S	D	K	E	5	2	3	1.05088	0.0671283	0.109429	0.286311	0.579893	STYX	0.559004	0.174435	0.325211	0.359456	CENTER
AT8A1_29	sp|P70704|AT8A1_MOUSE	P70704	29	0.992	RAEGYEKTDDVSEKTSLADQEEVRTIFINQP	S	L	A	D	5	2	3	-0.45498	-0.334309	-0.77786	-0.909155	-0.44769	STYX	-0.394645	0.0696384	-0.711568	0.0284638	CENTER
AT8B3_1145	sp|Q6UQ17|AT8B3_MOUSE	Q6UQ17	1145	1	RTVLKQRPKGEEEAPSEEVAVEPAMRHLRRG	S	E	E	V	4	2	2	-0.114364	-0.138141	NA	0.139546	-0.340289	STYX	-0.126253	0.472817	-0.100372	0.67364	CENTER
AT8B3_1324	sp|Q6UQ17|AT8B3_MOUSE	Q6UQ17	1324	0.992	SSFWKSPLWRDSASSSPSQLEVPRKQS____	S	P	S	Q	5	2	3	0.0244695	0.0699373	0.473508	0.667162	0.569716	STYX	0.0472034	0.745445	0.570129	0.103552	CENTER
AT8B3_138	sp|Q6UQ17|AT8B3_MOUSE	Q6UQ17	138	1	DKIINNRPCQILRGKSFLWKKWKNLCVGDVV	S	F	L	W	4	2	2	-0.28928	-0.0464047	1.05653	0.650499	NA	STYX	-0.167842	0.387221	0.853516	0.0789001	NR
ATAD1_322	sp|Q9D5T0|ATAD1_MOUSE	Q9D5T0	322	0.998	ALLCVREYVNSTSEESHDEDEIRPVQQQDLH	S	H	D	E	4	2	2	0.0563894	0.440605	NA	0.10377	-0.113677	STYX	0.248497	0.283423	-0.00495335	0.879142	CENTER
ATAT_261	sp|Q8K341|ATAT_MOUSE	Q8K341	261	1	AVEPPWPLNRAPRRATPPAHPPPRSSSLGNS	T	P	P	A	4	2	2	0.710999	0.169641	-0.122498	0.459782	NA	STYX	0.44032	0.126531	0.168642	0.763612	CENTER
ATAT_276	sp|Q8K341|ATAT_MOUSE	Q8K341	276	0.998	TPPAHPPPRSSSLGNSPDRGPLRPFVPEQEL	S	P	D	R	5	2	3	0.299766	0.398791	0.0149847	0.0625838	0.0174021	STYX	0.349278	0.119372	0.0316569	0.960231	CENTER
ATAT_315	sp|Q8K341|ATAT_MOUSE	Q8K341	315	0.995	PHPTARLLLATDPGGSPAQRRRTRGTPWGLV	S	P	A	Q	5	2	3	-0.676045	0.115383	-0.163401	-0.625814	-0.314384	STYX	-0.280331	0.434909	-0.367866	0.165789	CENTER
ATF2_94	sp|P16951|ATF2_MOUSE	P16951	94	0.998	KKASEDDIKKMPLDLSPLATPIIRSKIEEPS	S	P	L	A	5	2	3	-0.31105	0.144618	-0.17764	-0.389105	-0.231519	STYX	-0.0832157	0.713389	-0.266088	0.261296	CENTER
ATF6A_153	sp|F6VAN0|ATF6A_MOUSE	F6VAN0	153	0.998	EKPVTGPGNKTEHGLTPKKKIQMSSKPSVQP	T	P	K	K	4	2	2	0.69304	0.223793	0.45733	0.504327	NA	STYX	0.458416	0.102743	0.480828	0.24708	CENTER
ATG13_360	sp|Q91YI1|ATG13_MOUSE	Q91YI1	360	0.999	SEDTETVSNSSEGRASPHDILETIFVRKVGA	S	P	H	D	5	2	3	-0.123606	-0.112377	0.67272	0.445487	0.969366	STYX	-0.117992	0.504322	0.695858	0.0634656	CENTER
ATG2B_1570 1571	sp|Q80XK6|ATG2B_MOUSE	Q80XK6	1570 1571	0.898	VWHLYGGKDFATAPPTSPAKSYIPHSSPSQT WHLYGGKDFATAPPTSPAKSYIPHSSPSQTP	T	S	P	A	4	2	2	0.408481	0.290825	-0.086392	0.0611141	NA	STYX	0.349653	0.1198	-0.0126389	0.861629	CENTER
ATG2B_240	sp|Q80XK6|ATG2B_MOUSE	Q80XK6	240	0.987	GVSLFWDEFSASAKSSPVCSTAPVETEPKLS	S	P	V	C	4	2	2	0.495225	-0.231326	-0.159881	0.260271	NA	STYX	0.13195	0.765549	0.0501951	0.994906	CENTER
ATG2B_255	sp|Q80XK6|ATG2B_MOUSE	Q80XK6	255	0.992	SPVCSTAPVETEPKLSPSWNPKIVYEPHPQL	S	P	S	W	4	2	2	-0.107343	0.460737	0.0228115	0.0930253	NA	STYX	0.176697	0.549666	0.0579184	0.968708	CENTER
ATIF1_27	sp|O35143|ATIF1_MOUSE	O35143	27	0.991	FGVWGMKVLQTRGFVSDSSDSMDTGAGSIRE	S	D	S	S	4	2	2	-0.194727	-0.163107	-0.501615	NA	-0.597994	STYX	-0.178917	0.314184	-0.549805	0.115392	CENTER
ATIF1_32	sp|O35143|ATIF1_MOUSE	O35143	32	0.999	MKVLQTRGFVSDSSDSMDTGAGSIREAGGAF	S	M	D	T	5	2	3	-0.13082	-0.167342	-0.290244	-0.449997	-0.139878	STYX	-0.149081	0.39731	-0.293373	0.230555	CENTER
ATLA1_22	sp|Q8BH66|ATLA1_MOUSE	Q8BH66	22	0.989	DRNSWGGFSEKSSDWSSEEEEPVRKAGPVQV	S	S	E	E	5	2	3	0.0191117	-0.0838943	0.457954	0.478309	0.592209	STYX	-0.0323913	0.880608	0.50949	0.137509	CENTER
ATM_1897	sp|Q62388|ATM_MOUSE	Q62388	1897	0.996	HSSQASRSATPANSDSESENFLRCCLDKKSQ	S	E	S	E	4	2	2	-0.378694	-0.227814	NA	-0.0792657	0.298405	STYX	-0.303254	0.128047	0.10957	0.857718	CENTER
ATM_1987	sp|Q62388|ATM_MOUSE	Q62388	1987	0.999	STDEQEKRSPTFEEGSQGTTISSLSEKSKEE	S	Q	G	T	5	2	3	-0.326028	0.137628	0.17959	-0.198204	0.0561529	STYQ	-0.0941999	0.683897	0.0125129	0.901403	CENTER
ATMIN_94	sp|Q6P9S1|ATMIN_MOUSE	Q6P9S1	94	1	NILCTVRGCGKILPNSPALNMHLVKSHRLQD	S	P	A	L	5	2	3	-0.130331	0.578769	0.278715	0.324169	1.09367	STYX	0.224219	0.536826	0.565518	0.149287	CENTER
ATN1_34	sp|O35126|ATN1_MOUSE	O35126	34	0.998	EAPGPREELRSRGRASPGGVSTSSSDGKAEK	S	P	G	G	5	2	3	-0.319993	-0.0113804	-0.0991814	-0.576186	0.157514	STYX	-0.165686	0.414989	-0.172618	0.480843	CENTER
ATN1_630	sp|O35126|ATN1_MOUSE	O35126	630	0.998	TASPPGPPQYSKRAPSPGSYKTATPPGYKPG	S	P	G	S	5	2	3	-0.109546	0.128141	-0.202579	-0.543616	-0.63605	STYX	0.00929775	0.938591	-0.460749	0.0987885	CENTER
ATR_431	sp|Q9JKK8|ATR_MOUSE	Q9JKK8	431	0.999	CQAQQENLSGNNDEVSPKRRKLSSSLSSYKK	S	P	K	R	5	2	3	0.406806	0.530838	0.429632	0.485147	0.145734	STYX	0.468822	0.0704738	0.353504	0.305774	CENTER
ATRIP_97	sp|Q8BMG1|ATRIP_MOUSE	Q8BMG1	97	1	LSSAHKVRRLDGLPNSPIRKSREDIPVKDNF	S	P	I	R	5	2	3	0.188333	0.716424	0.535137	0.420789	0.447836	STYX	0.452378	0.116279	0.467921	0.169239	CENTER
ATRX_1290	sp|Q61687|ATRX_MOUSE	Q61687	1290	0.999	PDGGGKKRIGKQSEESPADDGELRREQLAVN	S	P	A	D	5	2	3	0.109952	-0.195096	-0.744526	-1.00255	-0.982441	STYX	-0.0425717	0.836509	-0.909838	0.0117996	NR
ATRX_590	sp|Q61687|ATRX_MOUSE	Q61687	590	0.998	RKELFVKLTPVSLSNSPIKGVDCQEVSQEKN	S	P	I	K	5	2	3	0.175065	-0.0417526	-0.904618	-0.646096	0.203628	STYX	0.0666563	0.696255	-0.449029	0.173551	CENTER
ATRX_912	sp|Q61687|ATRX_MOUSE	Q61687	912	1	SDGAEKPSVKEENVNSPEDKRVSKTKEKTKH	S	P	E	D	5	2	3	0.257735	-0.111361	-1.47616	-0.768304	-0.435216	STYX	0.0731873	0.738045	-0.893226	0.0214109	NR
ATRX_92	sp|Q61687|ATRX_MOUSE	Q61687	92	0.997	SRSKRKPSIVTKYVESDDEKPTDENVNEKAA	S	D	D	E	5	2	3	-0.0286711	-0.391902	-1.16683	-1.87759	-1.40464	STYX	-0.210287	0.329744	-1.48302	0.00402233	NR
ATX1_382	sp|P54254|ATX1_MOUSE	P54254	382	0.973	PSADLEAQQTTHREASPSTLNDKSGLHLGKP	S	P	S	T	5	2	3	0.0545931	0.173774	-0.708936	-0.719682	-0.9889	STYX	0.114183	0.502599	-0.805839	0.0175266	CENTER
ATX1_751	sp|P54254|ATX1_MOUSE	P54254	751	0.996	KIEPSKPTATRKRRWSAPETRKLEKSEDEPP	S	A	P	E	5	2	3	-0.407983	-0.0772517	-0.154553	-0.203863	0.042697	STYX	-0.242617	0.249502	-0.105239	0.576166	CENTER
ATX2_435	sp|O70305|ATX2_MOUSE	O70305	435	1	SAQYKARVALENDDRSEEEKYTAVQRNCSDR	S	E	E	E	5	2	3	0.00766056	-0.0478924	-0.669451	-0.720862	-0.993354	STYX	-0.0201159	0.941905	-0.794556	0.0185089	CENTER
ATX2_593	sp|O70305|ATX2_MOUSE	O70305	593	0.999	STMPKRMSSEGPPRMSPKAQRHPRNHRVSAG	S	P	K	A	5	2	3	-0.0274646	0.0716979	-0.254738	-0.383829	-0.553339	STYX	0.0221166	0.858724	-0.397302	0.129814	CENTER
ATX2_636	sp|O70305|ATX2_MOUSE	O70305	636	0.985	HNPPSEAAAPPVARTSPAGGTWSSVVSGVPR	S	P	A	G	5	2	3	-0.377417	0.265963	-0.0706234	-0.446361	-0.0741746	STYX	-0.0557272	0.814947	-0.197053	0.394388	CENTER
ATX2_653	sp|O70305|ATX2_MOUSE	O70305	653	0.999	AGGTWSSVVSGVPRLSPKTHRPRSPRQSSIG	S	P	K	T	5	2	3	-0.610772	0.284747	-0.155768	-0.859139	-0.518715	STYX	-0.163013	0.684393	-0.511207	0.0910096	CENTER
ATX2_697	sp|O70305|ATX2_MOUSE	O70305	697	0.998	GIIPAEAVSMPVPAASPTPASPASNRALTPS	S	P	T	P	5	2	3	-0.274441	-0.121192	-0.920139	-0.333773	-0.260682	STYX	-0.197816	0.285347	-0.504865	0.093944	CENTER
ATX2_702	sp|O70305|ATX2_MOUSE	O70305	702	0.989	EAVSMPVPAASPTPASPASNRALTPSIEAKD	S	P	A	S	4	2	2	-0.296527	-0.304501	NA	-0.0724506	0.212733	STYX	-0.300515	0.122856	0.0701411	0.945164	CENTER
ATX2_710	sp|O70305|ATX2_MOUSE	O70305	710	0.994	AASPTPASPASNRALTPSIEAKDSRLQDQRQ	T	P	S	I	5	2	3	-0.0546186	-0.146174	-0.670657	-1.85462	-1.13706	STYX	-0.100396	0.577866	-1.22078	0.00846294	NR
ATX2_727	sp|O70305|ATX2_MOUSE	O70305	727	0.997	SIEAKDSRLQDQRQNSPAGSKENVKASETSP	S	P	A	G	5	2	3	0.679486	0.0891691	0.814131	-0.0602326	-1.22243	STYX	0.384328	0.186556	-0.156178	0.724004	CENTER
ATX2_741	sp|O70305|ATX2_MOUSE	O70305	741	0.992	NSPAGSKENVKASETSPSFSKADNKGMSPVV	S	P	S	F	5	2	3	0.123416	0.28085	-0.242056	-0.161308	-0.206966	STYX	0.202133	0.288659	-0.203443	0.358632	CENTER
ATX2_753	sp|O70305|ATX2_MOUSE	O70305	753	0.999	SETSPSFSKADNKGMSPVVSEHRKQIDDLKK	S	P	V	V	4	2	2	-0.194978	0.226538	NA	0.627934	-0.0319517	STYX	0.0157796	0.9601	0.297991	0.544663	CENTER
ATX2_832	sp|O70305|ATX2_MOUSE	O70305	832	0.986	SSSSSNCTSGSSKTNSPSISPSMLSNAEHKR	S	P	S	I	4	2	2	-0.139465	0.0508326	NA	-0.0707682	-0.371398	STYX	-0.0443163	0.823346	-0.221083	0.438874	CENTER
ATX2_836	sp|O70305|ATX2_MOUSE	O70305	836	0.996	SNCTSGSSKTNSPSISPSMLSNAEHKRGPEV	S	P	S	M	5	2	3	-0.10708	0.107334	-0.434258	-0.125234	-0.426905	STYX	0.00012745	0.977059	-0.328799	0.192467	CENTER
ATX2_860	sp|O70305|ATX2_MOUSE	O70305	860	0.991	HKRGPEVTSQGVQTSSPACKQEKDDREEKKD	S	P	A	C	5	2	3	-0.243309	0.084564	-0.281625	-0.286247	0.114353	STYX	-0.0793723	0.69534	-0.151173	0.477463	CENTER
ATX2L_109	sp|Q7TQH0|ATX2L_MOUSE	Q7TQH0	109	0.999	IGSVRGQTTGKGPPQSPVFEGVYNNSRMLHF	S	P	V	F	5	2	3	0.398519	-0.154258	-0.175501	-0.60164	-0.430331	STYX	0.122131	0.688946	-0.402491	0.133865	CENTER
ATX2L_27	sp|Q7TQH0|ATX2L_MOUSE	Q7TQH0	27	0.993	QPQQPPPTQQAVARRSPGGTSPPNGGLPGPL	S	P	G	G	5	2	3	-0.0585656	-0.304466	-0.125997	-0.133491	-0.0418657	STYX	-0.181516	0.35339	-0.100451	0.586817	CENTER
ATX2L_304	sp|Q7TQH0|ATX2L_MOUSE	Q7TQH0	304	0.976	QRELRAAQLAREIESSPQYRLRIAMENDDGR	S	P	Q	Y	5	2	3	0.558842	0.453818	0.555109	0.499769	0.424649	STYX	0.50633	0.0614726	0.493176	0.149676	CENTER
ATX2L_31 32	sp|Q7TQH0|ATX2L_MOUSE	Q7TQH0	31 32	0.887	PPPTQQAVARRSPGGTSPPNGGLPGPLTATA PPTQQAVARRSPGGTSPPNGGLPGPLTATAA	T	S	P	P	5	2	3	-0.262123	-0.514958	-0.114564	-0.0517695	-0.0854992	STYX	-0.388541	0.0820617	-0.0839442	0.631751	CENTER
ATX2L_32	sp|Q7TQH0|ATX2L_MOUSE	Q7TQH0	32	0.997	PPTQQAVARRSPGGTSPPNGGLPGPLTATAA	S	P	P	N	5	2	3	-0.204875	-0.110461	0.0204366	0.0421246	-0.0156405	STYX	-0.157668	0.380521	0.0156403	0.91403	CENTER
ATX2L_337	sp|Q7TQH0|ATX2L_MOUSE	Q7TQH0	337	0.997	EEKHSAVQRQGSGRESPSLVSREGKYIPLPQ	S	P	S	L	5	2	3	-0.144346	0.0344809	0.655253	0.386101	0.107049	STYX	-0.0549326	0.774411	0.382801	0.284637	CENTER
ATX2L_388 389	sp|Q7TQH0|ATX2L_MOUSE	Q7TQH0	388 389	0.887	GLSSLPPRGPHHLDNSSPGPGSEARGINGGP LSSLPPRGPHHLDNSSPGPGSEARGINGGPS	S	S	P	G	5	2	3	0.370782	-0.0370908	0.897533	0.156551	0.456834	STYX	0.166846	0.466525	0.503639	0.178832	CENTER
ATX2L_389	sp|Q7TQH0|ATX2L_MOUSE	Q7TQH0	389	0.994	LSSLPPRGPHHLDNSSPGPGSEARGINGGPS	S	P	G	P	5	2	3	0.513791	-0.0843521	0.372841	0.537738	0.493869	STYX	0.214719	0.475946	0.468149	0.169239	CENTER
ATX2L_422	sp|Q7TQH0|ATX2L_MOUSE	Q7TQH0	422	0.987	SPKAQRPLRGAKTLSSPSNRPSGEASVPPTS	S	P	S	N	4	2	2	-0.181795	0.305886	NA	-0.116004	0.594468	STYX	0.0620453	0.831238	0.239232	0.655212	CENTER
ATX2L_453	sp|Q7TQH0|ATX2L_MOUSE	Q7TQH0	453	0.999	AALPFLPVGRMYPPRSPKSAAPAPVSASCPE	S	P	K	S	5	2	3	0.1237	0.0619935	0.625148	0.371805	0.301405	STYX	0.0928468	0.562351	0.432786	0.207017	CENTER
ATX2L_496	sp|Q7TQH0|ATX2L_MOUSE	Q7TQH0	496	0.945	IPVTSSVVDPGAGSISPASPKLSLTPTDVKE	S	P	A	S	5	2	3	-0.0414589	-0.198319	3.8149	0.248319	-0.00573126	STYX	-0.119889	0.515234	1.3525	0.238921	NR
ATX2L_499	sp|Q7TQH0|ATX2L_MOUSE	Q7TQH0	499	0.998	TSSVVDPGAGSISPASPKLSLTPTDVKELPT	S	P	K	L	5	2	3	-0.0866048	-0.251957	0.791991	0.153634	0.235585	STYX	-0.169281	0.358551	0.393737	0.28873	CENTER
ATX2L_505	sp|Q7TQH0|ATX2L_MOUSE	Q7TQH0	505	0.994	PGAGSISPASPKLSLTPTDVKELPTKEPSRN	T	P	T	D	5	2	3	0.283754	0.261197	-0.378794	-0.44385	-0.154262	STYX	0.272475	0.178469	-0.325635	0.192983	CENTER
ATX2L_562	sp|Q7TQH0|ATX2L_MOUSE	Q7TQH0	562	0.996	ELRKFGAQFKLQPSSSPETGLDPFPSRILKE	S	P	E	T	5	2	3	0.0265512	0.155057	-0.0383026	0.0736356	0.128054	STYX	0.0908041	0.583648	0.0544624	0.975128	CENTER
ATX2L_597	sp|Q7TQH0|ATX2L_MOUSE	Q7TQH0	597	0.999	KEKEVDGLLTSDPMGSPVSSKTESILDKEDK	S	P	V	S	5	2	3	-0.0788915	0.259425	-0.0460881	-0.0865333	0.152133	STYX	0.0902668	0.66368	0.0065038	0.883829	CENTER
ATX2L_637	sp|Q7TQH0|ATX2L_MOUSE	Q7TQH0	637	0.988	EGPEQLPAPCPSQTGSPPVGLIKGDEKEEGP	S	P	P	V	4	2	2	0.190997	-0.22373	-0.15886	0.0208744	NA	STYX	-0.0163665	0.927316	-0.068993	0.731341	CENTER
ATX2L_681 682 683 684	sp|Q7TQH0|ATX2L_MOUSE	Q7TQH0	681 682 683 684	0.897	AKEFNPTKPLLSVNKSTSTPTSPGPRTHSTP KEFNPTKPLLSVNKSTSTPTSPGPRTHSTPS EFNPTKPLLSVNKSTSTPTSPGPRTHSTPSI FNPTKPLLSVNKSTSTPTSPGPRTHSTPSIP	S	T	S	T	5	2	3	0.405325	0.236545	0.608808	0.400466	0.472421	STYX	0.320935	0.144707	0.493898	0.150493	CENTER
ATX2L_681 682 683 684 686 687	sp|Q7TQH0|ATX2L_MOUSE	Q7TQH0	681 682 683 684 686 687	0.896	AKEFNPTKPLLSVNKSTSTPTSPGPRTHSTP KEFNPTKPLLSVNKSTSTPTSPGPRTHSTPS EFNPTKPLLSVNKSTSTPTSPGPRTHSTPSI FNPTKPLLSVNKSTSTPTSPGPRTHSTPSIP PTKPLLSVNKSTSTPTSPGPRTHSTPSIPVL TKPLLSVNKSTSTPTSPGPRTHSTPSIPVLT	S	T	S	T	4	2	2	-0.128542	-0.155884	0.499523	0.492025	NA	STYX	-0.142213	0.41673	0.495774	0.233923	CENTER
ATX2L_683	sp|Q7TQH0|ATX2L_MOUSE	Q7TQH0	683	0.988	EFNPTKPLLSVNKSTSTPTSPGPRTHSTPSI	S	T	P	T	5	2	3	-0.965738	0.118887	0.809002	0.763193	0.186375	STYX	-0.423426	0.405012	0.58619	0.1178	CENTER
ATX2L_686 687	sp|Q7TQH0|ATX2L_MOUSE	Q7TQH0	686 687	0.884	PTKPLLSVNKSTSTPTSPGPRTHSTPSIPVL TKPLLSVNKSTSTPTSPGPRTHSTPSIPVLT	T	S	P	G	5	2	3	0.430362	0.436935	0.611717	0.879939	0.501919	STYX	0.433649	0.0797712	0.664525	0.0689212	CENTER
ATX2L_687	sp|Q7TQH0|ATX2L_MOUSE	Q7TQH0	687	0.991	TKPLLSVNKSTSTPTSPGPRTHSTPSIPVLT	S	P	G	P	5	2	3	0.668504	0.37942	0.409155	0.804947	0.46896	STYX	0.523962	0.0633557	0.561021	0.114677	CENTER
ATX2L_766	sp|Q7TQH0|ATX2L_MOUSE	Q7TQH0	766	0.999	KGSLPPQRSDQHQPASAPPMMQAAAAAAGPP	S	A	P	P	4	2	2	0.0108494	-0.360456	0.0482612	0.255442	NA	STYX	-0.174803	0.414345	0.151851	0.754169	CENTER
ATX3_260 261	sp|Q9CVD2|ATX3_MOUSE	Q9CVD2	260 261	0.898	EEADLRRAIQLSMQGSSRSMCENSPQTSSPD EADLRRAIQLSMQGSSRSMCENSPQTSSPDL	S	S	R	S	5	2	3	0.013176	-0.178413	0.433584	0.476468	-0.137759	STYX	-0.0826185	0.660252	0.257431	0.502398	CENTER
ATX3_268	sp|Q9CVD2|ATX3_MOUSE	Q9CVD2	268	0.997	IQLSMQGSSRSMCENSPQTSSPDLSSEELRR	S	P	Q	T	5	2	3	0.258399	-0.122399	0.265719	0.560711	0.0351364	STYX	0.0679999	0.762802	0.287189	0.431145	CENTER
ATX3_271 272 273	sp|Q9CVD2|ATX3_MOUSE	Q9CVD2	271 272 273	0.858	SMQGSSRSMCENSPQTSSPDLSSEELRRRRE MQGSSRSMCENSPQTSSPDLSSEELRRRREA QGSSRSMCENSPQTSSPDLSSEELRRRREAY	T	S	S	P	5	2	3	0.0733489	-0.288529	0.278776	0.335151	0.102127	STYX	-0.10759	0.60909	0.238685	0.495033	CENTER
ATX3_273	sp|Q9CVD2|ATX3_MOUSE	Q9CVD2	273	0.998	QGSSRSMCENSPQTSSPDLSSEELRRRREAY	S	P	D	L	5	2	3	-0.189886	-0.27769	0.558431	0.447271	0.306049	STYX	-0.233788	0.207689	0.437251	0.199611	CENTER
AUTS2_1235	sp|A0A087WPF7|AUTS2_MOUSE	A0A087WPF7	1235	0.997	SAPPPLISTLGGRPGSPRRTTPLSAEIRERP	S	P	R	R	5	2	3	0.0986529	-0.0903803	-0.184473	0.307894	0.0248542	STYX	0.00413634	0.95705	0.0494252	0.999451	CENTER
AUTS2_941	sp|A0A087WPF7|AUTS2_MOUSE	A0A087WPF7	941	0.996	GRAAGEEPKQLSRVPSPYVRTPGVDSTRPNS	S	P	Y	V	5	2	3	-0.0501377	0.239366	0.108795	-0.108232	0.252767	STYX	0.0946143	0.624461	0.084443	0.89108	CENTER
AVL9_244	sp|Q80U56|AVL9_MOUSE	Q80U56	244	0.989	IEHGLSDCSQYRPRKSMSEDAGPQESNPSAD	S	M	S	E	4	2	2	-0.753714	0.0772907	NA	-0.0980735	-0.412645	STYX	-0.338212	0.363224	-0.255359	0.386246	CENTER
AVL9_368	sp|Q80U56|AVL9_MOUSE	Q80U56	368	0.997	SDQTHLFQKDSLPSDSPPITVQPQANNRQVV	S	P	P	I	4	2	2	0.0305768	0.0838623	0.00916197	NA	-0.0240187	STYX	0.0572196	0.70284	-0.00742836	0.872623	CENTER
AXIN1_485	sp|O35625|AXIN1_MOUSE	O35625	485	0.999	LDEHVQRVMRTPGCQSPGPGHRSPDSGHVAK	S	P	G	P	5	2	3	0.678458	-0.197757	0.0313667	0.525274	-0.0610091	STYX	0.24035	0.625816	0.165211	0.719487	CENTER
AXIN1_77	sp|O35625|AXIN1_MOUSE	O35625	77	0.997	RRSDLDLGYEPEGSASPTPPYLRWAESLHSL	S	P	T	P	5	2	3	-0.0827336	-0.181307	0.18889	0.560879	0.483005	STYX	-0.13202	0.461169	0.410925	0.236109	CENTER
AZI2_313 314	sp|Q9QYP6|AZI2_MOUSE	Q9QYP6	313 314	0.886	HPSLSPNGKAPCYAPSSPLPGDRKVFSDKAV PSLSPNGKAPCYAPSSPLPGDRKVFSDKAVL	S	S	P	L	4	2	2	-0.017494	0.0319496	-0.195632	NA	-0.262666	STYX	0.0072278	0.927853	-0.229149	0.410005	CENTER
B1AR10_441	tr|B1AR10|B1AR10_MOUSE	B1AR10	441	0.998	RFTTTASSSSRARAPSPGDYKSPHITGAGAS	S	P	G	D	5	2	3	-0.374295	0.390045	-0.352872	-0.711218	-0.715277	STYX	0.00787505	0.952747	-0.593122	0.0486655	CENTER
B1ASB6_39	tr|B1ASB6|B1ASB6_MOUSE	B1ASB6	39	1	PTLSKEGLSAKGPPPSPVLPPFRRKCRKCGI	S	P	V	L	5	2	3	-0.170314	0.00826465	-0.0872534	-0.573407	-0.117302	STYX	-0.0810246	0.664252	-0.259321	0.305372	CENTER
B1AV60_289	tr|B1AV60|B1AV60_MOUSE	B1AV60	289	0.981	AKDRHFLTFNSTRSPSPTECCHMAPWSRKSH	S	P	T	E	5	2	3	-0.391723	-0.208543	-0.457757	-0.664075	-1.16369	STYX	-0.300133	0.135516	-0.76184	0.0266728	CENTER
B1AVB3_34	tr|B1AVB3|B1AVB3_MOUSE	B1AVB3	34	0.992	TGSISAPSEYFRQSKTPPTNEFKIGMKLEAR	T	P	P	T	5	2	3	0.352232	0.00989058	0.340612	0.391808	0.207388	STYX	0.181061	0.402224	0.313269	0.355141	CENTER
B1AVB3_619	tr|B1AVB3|B1AVB3_MOUSE	B1AVB3	619	0.997	MPALFSALSVSSTERTPPSSSEQPKSSTSGK	T	P	P	S	4	2	2	0.778846	-0.302213	NA	0.0286914	0.404184	STYX	0.238316	0.763832	0.216438	0.641239	CENTER
B1AVP0_237	tr|B1AVP0|B1AVP0_MOUSE	B1AVP0	237	0.998	GSSHPKKATGSKASASPSTSSTSSRPRAPKE	S	P	S	T	4	2	2	-0.141008	0.124751	-0.769636	-1.16125	NA	STYX	-0.0081282	0.979752	-0.965445	0.0369758	NR
B1AW18_300	tr|B1AW18|B1AW18_MOUSE	B1AW18	300	0.999	MPLSKQESSFVIKLQTPPDFYRANKYRKYES	T	P	P	D	4	2	2	-0.106156	0.0596076	NA	0.719708	0.838272	STYX	-0.0232743	0.920254	0.77899	0.0905586	CENTER
B1AW18_315	tr|B1AW18|B1AW18_MOUSE	B1AW18	315	0.988	TPPDFYRANKYRKYESPVHLGTEETDPNELE	S	P	V	H	4	2	2	-0.456488	-0.217306	0.288536	NA	0.980727	STYX	-0.336897	0.113558	0.634631	0.183636	CENTER
B1AW18_95	tr|B1AW18|B1AW18_MOUSE	B1AW18	95	0.988	SVESPLFPTISHRVCSPTANKNQQKPADDSG	S	P	T	A	5	2	3	0.473204	-0.25916	1.54868	1.30566	1.44966	STYX	0.107022	0.829044	1.43467	0.00549176	NR
B1AWN8_222	tr|B1AWN8|B1AWN8_MOUSE	B1AWN8	222	0.989	KKEAKTTKKGSKDKVSATESGGEKAGSKKEA	S	A	T	E	4	2	2	0.25553	-0.588818	1.44873	0.58749	NA	STYX	-0.166644	0.657726	1.01811	0.0684078	NR
B1AWN8_226	tr|B1AWN8|B1AWN8_MOUSE	B1AWN8	226	0.999	KTTKKGSKDKVSATESGGEKAGSKKEAKATK	S	G	G	E	5	2	3	0.38646	-0.448618	1.47311	0.577034	0.886744	STYX	-0.0310792	0.880697	0.978964	0.025364	NR
B1AWN8_253	tr|B1AWN8|B1AWN8_MOUSE	B1AWN8	253	0.999	KATKKGSKDKVSGTESGGEKAGSKKEAKTTK	S	G	G	E	4	2	2	1.27351	-1.21679	NA	1.75969	1.40632	STYX	0.028363	0.964585	1.58301	0.0208481	NR
B1AXN3_208	tr|B1AXN3|B1AXN3_MOUSE	B1AXN3	208	0.991	VNQTKMKSSDGSLSTSARSNKGDIQILEMEK	S	A	R	S	4	2	2	-0.0790296	-0.33919	0.355441	0.138291	NA	STYX	-0.20911	0.292306	0.246866	0.566745	CENTER
B1AXP3_319	tr|B1AXP3|B1AXP3_MOUSE	B1AXP3	319	0.998	DLLTTVQTHYKYLKGSPAITCRPVPSIKKSK	S	P	A	I	5	2	3	0.00854701	0.135	0.497051	0.688011	0.666544	STYX	0.0717736	0.6522	0.617202	0.0819985	CENTER
B1AXP3_64	tr|B1AXP3|B1AXP3_MOUSE	B1AXP3	64	0.998	LPRNSFKPEWCYRKPSAPMEGLTTCRRDFGL	S	A	P	M	5	2	3	-0.117352	-0.0346973	0.819486	0.870776	0.677801	STYX	-0.0760245	0.683236	0.789354	0.0367425	CENTER
B1B0V2_104	tr|B1B0V2|B1B0V2_MOUSE	B1B0V2	104	1	GHARPMMRSQRELGLTPKGGGKADQGGKGRK	T	P	K	G	5	2	3	-0.61192	-0.137676	0.434227	0.30165	0.77144	STYX	-0.374798	0.135339	0.502439	0.156059	CENTER
B1B0V2_256	tr|B1B0V2|B1B0V2_MOUSE	B1B0V2	256	0.997	DDDDGDGGPDPRGSGTPEGWVLRSGVVPFGR	T	P	E	G	5	2	3	-0.272506	-0.198299	-0.454228	-0.944048	-0.385945	STYX	-0.235403	0.202938	-0.59474	0.0535491	CENTER
B1B0V2_306	tr|B1B0V2|B1B0V2_MOUSE	B1B0V2	306	0.999	GWNLRPRPRSSASAVSPEARPKAQSAGRNLR	S	P	E	A	5	2	3	0.106884	-0.246891	0.0640967	-0.197932	-0.372642	STYX	-0.0700038	0.734481	-0.168826	0.442863	CENTER
B1B0V2_332	tr|B1B0V2|B1B0V2_MOUSE	B1B0V2	332	0.999	GRNLRPRPRSSASVVSPEARPKAQSAGRNLR	S	P	E	A	5	2	3	-0.346193	-0.379264	-0.141883	-0.00350938	-0.668123	STYX	-0.362728	0.0803924	-0.271172	0.309818	CENTER
B1B0V2_358	tr|B1B0V2|B1B0V2_MOUSE	B1B0V2	358	0.997	GRNLRPRPRSSASVVSPEARPEAQSAGRNLR	S	P	E	A	5	2	3	-0.418337	-0.103094	-0.39916	-0.162695	-0.267258	STYX	-0.260716	0.215258	-0.276371	0.24852	CENTER
B1B0V2_479	tr|B1B0V2|B1B0V2_MOUSE	B1B0V2	479	0.999	SRFAVPGRSSLAAEDSPPRRPVRMRASSPSP	S	P	P	R	5	2	3	0.102529	-0.16244	0.0921811	-0.0034946	-0.571848	STYX	-0.0299554	0.883539	-0.161054	0.509317	CENTER
B2KF50_929	tr|B2KF50|B2KF50_MOUSE	B2KF50	929	0.998	SDQGAVSPEKVLRDGSGENLAASQERLPSDG	S	G	E	N	5	2	3	0.534966	-0.346692	-0.526218	-0.255988	0.216609	STYX	0.0941366	0.911413	-0.188532	0.430838	CENTER
B2L11_83	sp|O54918|B2L11_MOUSE	O54918	83	0.972	PFATRSPLFIFVRRSSLLSRSSSGYFSFDTD	S	L	L	S	4	2	2	0.121963	-0.487451	NA	0.221025	0.0109587	STYX	-0.182744	0.517853	0.115992	0.83621	CENTER
B2L13_35	sp|P59017|B2L13_MOUSE	P59017	35	0.999	LSYLGLLSQEKQQGPSPPGVQLDVAPQSLNP	S	P	P	G	4	2	2	-0.0762342	-0.161307	-0.289315	0.0297158	NA	STYX	-0.118771	0.50346	-0.1298	0.604399	CENTER
B2L13_387	sp|P59017|B2L13_MOUSE	P59017	387	0.992	GAAQLSEERAGSRKKSHTGEAAAVRGAKSGL	S	H	T	G	5	2	3	0.426093	-0.885163	-0.81473	0.274958	-0.555846	STYX	-0.229535	0.752099	-0.365206	0.23968	CENTER
B2L13_389	sp|P59017|B2L13_MOUSE	P59017	389	0.998	AQLSEERAGSRKKSHTGEAAAVRGAKSGLPA	T	G	E	A	5	2	3	1.24025	-1.26634	0.775018	0.0158785	-0.802011	STYX	-0.013047	0.960996	-0.00370483	0.887143	CENTER
B2L14_107 108	sp|Q9CPT0|B2L14_MOUSE	Q9CPT0	107 108	0.897	WRTLFRVAEKEEGLPSSPKEIRAQGPQGPFP RTLFRVAEKEEGLPSSPKEIRAQGPQGPFPV	S	S	P	K	4	2	2	-0.246777	-0.0542895	1.39809	NA	1.05657	STYX	-0.150533	0.42055	1.22733	0.0321867	NR
B2L14_108	sp|Q9CPT0|B2L14_MOUSE	Q9CPT0	108	0.971	RTLFRVAEKEEGLPSSPKEIRAQGPQGPFPV	S	P	K	E	5	2	3	-0.392788	-0.120192	1.33971	1.59039	1.10216	STYX	-0.25649	0.207852	1.34409	0.00687887	NR
B2L14_44	sp|Q9CPT0|B2L14_MOUSE	Q9CPT0	44	0.999	FYARHHVFKNTPAVFSPKLSRTRSLSQKALG	S	P	K	L	5	2	3	-0.120993	0.0389529	0.86147	0.825201	0.884528	STYX	-0.0410199	0.839235	0.857066	0.0269885	NR
B2RPU8_45	tr|B2RPU8|B2RPU8_MOUSE,sp|Q9D1L0|CHCH2_MOUSE	B2RPU8	45	0.999	PAAQPPAAAAPSAVGSPAAAPRQPGLMAQMA	S	P	A	A	5	2	3	-0.327746	-0.123117	0.0274981	-0.108313	-0.464797	STYX	-0.225431	0.242674	-0.181871	0.430454	CENTER
B2RQG2_1882	tr|B2RQG2|B2RQG2_MOUSE	B2RQG2	1882	1	NFYQVKDIRRPERRHSDPWGRQDQQQPDRPF	S	D	P	W	4	2	2	0.957138	0.0857406	NA	-0.177207	0.548453	STYX	0.521439	0.163303	0.185623	0.757343	CENTER
B2RQG2_249	tr|B2RQG2|B2RQG2_MOUSE	B2RQG2	249	0.999	DPKHACNNQGEVNVPSPELDCPLLSETSASV	S	P	E	L	5	2	3	-0.0141451	-0.208007	-0.179347	-0.395253	-0.488293	STYX	-0.111076	0.553351	-0.354297	0.165049	CENTER
B2RQG2_281 282	tr|B2RQG2|B2RQG2_MOUSE	B2RQG2	281 282	0.89	EKNIEALMECKAKTNSSPLFKFPVREDEQSD KNIEALMECKAKTNSSPLFKFPVREDEQSDL	S	S	P	L	4	2	2	0.803363	1.01545	0.010611	0.261146	NA	STYX	0.909404	0.0266412	0.135878	0.791779	NR
B2RQG2_282	tr|B2RQG2|B2RQG2_MOUSE	B2RQG2	282	0.993	KNIEALMECKAKTNSSPLFKFPVREDEQSDL	S	P	L	F	5	2	3	1.0651	0.98239	0.122284	-0.0020062	0.472528	STYX	1.02374	0.02336	0.197602	0.616948	NR
B2RT41_356	tr|B2RT41|B2RT41_MOUSE	B2RT41	356	0.995	SQGLEDKEQNLTRRLSASDIVSEKKLGEEEE	S	A	S	D	5	2	3	-0.466763	-0.0305729	-0.79163	-0.396186	-1.16181	STYX	-0.248668	0.289017	-0.78321	0.0258623	CENTER
B2RT41_506 507	tr|B2RT41|B2RT41_MOUSE	B2RT41	506 507	0.873	RFMKLVGGKRRARSKSSDPDLRRSLEKQSDS FMKLVGGKRRARSKSSDPDLRRSLEKQSDSA	S	S	D	P	4	2	2	0.58054	-0.0200079	NA	-0.450581	-0.11355	STYX	0.280266	0.339156	-0.282066	0.351018	CENTER
B2RT41_658	tr|B2RT41|B2RT41_MOUSE	B2RT41	658	0.999	RAFKPEETSSNSDPPSPPVLNNSQPLSRSNL	S	P	P	V	5	2	3	-0.296432	0.0382886	-0.0413201	-0.150787	-0.215318	STYX	-0.129072	0.53157	-0.135809	0.500729	CENTER
B2RT41_952	tr|B2RT41|B2RT41_MOUSE	B2RT41	952	0.999	EQDRLGPNKMMRLDNSPISSPRKHSAELIAM	S	P	I	S	5	2	3	0.214805	0.470136	0.140015	0.155922	-0.0534974	STYX	0.34247	0.13939	0.0808134	0.899223	CENTER
B2RUM3_89	tr|B2RUM3|B2RUM3_MOUSE	B2RUM3	89	0.994	CFHHSTEEVKGSDCASEYQALKECMQKYPDI	S	E	Y	Q	5	2	3	0.20111	-0.322947	-0.991103	-0.766779	-0.159189	STYX	-0.0609188	0.789016	-0.639024	0.0567001	CENTER
B2RXA7_419	tr|B2RXA7|B2RXA7_MOUSE	B2RXA7	419	1	MYSIRDTHETAAVYRSPPEGFDPERFGVESG	S	P	P	E	5	2	3	-0.277628	0.138937	-0.0200872	0.192075	0.282858	STYX	-0.0693457	0.750135	0.151615	0.705215	CENTER
B2RXB0_221	tr|B2RXB0|B2RXB0_MOUSE	B2RXB0	221	0.997	NSEAIMLLAAERNSSSLLELSNRHQTSRDRH	S	L	L	E	5	2	3	0.0388877	0.195647	0.244401	0.313293	1.22141	STYX	0.117267	0.502599	0.593034	0.150884	CENTER
B2RXC2_179	tr|B2RXC2|B2RXC2_MOUSE	B2RXC2	179	0.985	SAIQAPRSPRLGRARSPSPCPFRSSSQPPER	S	P	S	P	5	2	3	0.297675	0.0966662	-0.32466	-0.494638	-0.537009	STYX	0.19717	0.310626	-0.452102	0.0930469	CENTER
B2RXC2_200	tr|B2RXC2|B2RXC2_MOUSE	B2RXC2	200	0.997	FRSSSQPPERVLAPCSPSEERRTKSWGEQCT	S	P	S	E	5	2	3	-0.142023	0.0351269	-0.214809	-1.10139	-0.51061	STYX	-0.053448	0.781834	-0.608938	0.0653004	CENTER
B2RXC2_209	tr|B2RXC2|B2RXC2_MOUSE	B2RXC2	209	0.997	RVLAPCSPSEERRTKSWGEQCTETPDTNSGR	S	W	G	E	4	2	2	-0.436063	0.158965	-0.0341748	-0.349022	NA	STYX	-0.138549	0.608302	-0.191598	0.487209	CENTER
B2RXC2_247	tr|B2RXC2|B2RXC2_MOUSE	B2RXC2	247	0.992	PSKDKEGVAPLLGPASPTRLGTQSPSTSVRM	S	P	T	R	5	2	3	-0.685002	-0.0238134	-0.28948	-1.05336	-0.35119	STYX	-0.354408	0.237808	-0.564676	0.0770297	CENTER
B2RXC2_274	tr|B2RXC2|B2RXC2_MOUSE	B2RXC2	274	0.988	SVRMERGTPASPRCGSPTPMETDKRVAPSLE	S	P	T	P	5	2	3	-0.27114	-0.194925	-1.32669	-1.04557	-1.82315	STYX	-0.233032	0.207527	-1.39847	0.00459246	NR
B2RXM2_328 329	tr|B2RXM2|B2RXM2_MOUSE,sp|Q8BG05|ROA3_MOUSE	B2RXM2	328 329	0.875	QSNYGPMKGGSFGGRSSGSPYGGGYGSGGGS SNYGPMKGGSFGGRSSGSPYGGGYGSGGGSG	S	S	G	S	4	2	2	-0.381019	0.270798	0.0084543	NA	-0.114812	STYX	-0.0551106	0.817657	-0.0531787	0.765542	CENTER
B2RXM2_331	tr|B2RXM2|B2RXM2_MOUSE,sp|Q8BG05|ROA3_MOUSE	B2RXM2	331	0.996	YGPMKGGSFGGRSSGSPYGGGYGSGGGSGGY	S	P	Y	G	5	2	3	0.0671759	0.70794	0.160406	0.153189	-0.142618	STYX	0.387558	0.204058	0.0569925	0.967809	CENTER
B2RXM2_333	tr|B2RXM2|B2RXM2_MOUSE,sp|Q8BG05|ROA3_MOUSE	B2RXM2	333	0.996	PMKGGSFGGRSSGSPYGGGYGSGGGSGGYGS	Y	G	G	G	5	2	3	-0.14621	0.146914	0.0733732	0.0229914	-0.178432	STYX	0.00035195	0.992591	-0.0273558	0.787786	CENTER
B2RXM2_339	tr|B2RXM2|B2RXM2_MOUSE,sp|Q8BG05|ROA3_MOUSE	B2RXM2	339	0.998	FGGRSSGSPYGGGYGSGGGSGGYGSRRF___	S	G	G	G	5	2	3	0.16109	0.0484754	-0.0309318	0.659669	-0.2503	STYX	0.104783	0.530906	0.126146	0.874727	CENTER
B2RXQ2_1236	tr|B2RXQ2|B2RXQ2_MOUSE	B2RXQ2	1236	0.989	AETLPANFRVTSSMSSPSMQPKKVQMDGSVS	S	P	S	M	5	2	3	0.120262	0.19078	-0.089833	-0.301543	-0.083202	STYX	0.155521	0.375892	-0.158193	0.458211	CENTER
B2RXQ2_238 239	tr|B2RXQ2|B2RXQ2_MOUSE	B2RXQ2	238 239	0.887	GNHEQESAPSTNGKRSSDGSLSHEDLAKVLE NHEQESAPSTNGKRSSDGSLSHEDLAKVLEL	S	S	D	G	5	2	3	-0.262846	0.573403	-0.669285	-0.258367	-0.579482	STYX	0.155278	0.777085	-0.502378	0.0779436	CENTER
B2RXQ2_238 239 242	tr|B2RXQ2|B2RXQ2_MOUSE	B2RXQ2	238 239 242	0.89	GNHEQESAPSTNGKRSSDGSLSHEDLAKVLE NHEQESAPSTNGKRSSDGSLSHEDLAKVLEL QESAPSTNGKRSSDGSLSHEDLAKVLELQEV	S	S	D	G	5	2	3	0.0928384	0.0173033	-1.09324	-0.357306	-0.531297	STYX	0.0550708	0.714397	-0.660615	0.0443966	CENTER
B2RXQ2_690	tr|B2RXQ2|B2RXQ2_MOUSE	B2RXQ2	690	0.991	ENTEQRAEEIESRVGSGSLDNLGRFRSMSSI	S	G	S	L	5	2	3	-0.224558	-0.276176	-1.12561	-0.963362	-0.0917874	STYX	-0.250367	0.179233	-0.72692	0.0514183	CENTER
B2RXQ2_692	tr|B2RXQ2|B2RXQ2_MOUSE	B2RXQ2	692	0.997	TEQRAEEIESRVGSGSLDNLGRFRSMSSIPP	S	L	D	N	5	2	3	-0.10184	-0.161345	-1.19788	-0.952915	-1.0471	STYX	-0.131592	0.455507	-1.06597	0.00726405	NR
B2RXQ2_716 717	tr|B2RXQ2|B2RXQ2_MOUSE	B2RXQ2	716 717	0.898	SMSSIPPYPASSLAGSSPPGSGRSTPRRVPH MSSIPPYPASSLAGSSPPGSGRSTPRRVPHS	S	S	P	P	5	2	3	0.0192368	-0.10543	-0.116708	-0.183606	-0.270902	STYX	-0.0430966	0.83036	-0.190405	0.386106	CENTER
B2RXQ2_77	tr|B2RXQ2|B2RXQ2_MOUSE	B2RXQ2	77	1	ALTQGKLHEVGHERDSLQRQLNTALPQEFAA	S	L	Q	R	5	2	3	0.277021	0.264702	-0.392432	-0.762743	-0.416303	STYX	0.270861	0.179744	-0.523826	0.0685917	CENTER
B2RXQ2_774 775	tr|B2RXQ2|B2RXQ2_MOUSE	B2RXQ2	774 775	0.887	SREEVRDDKTTIKCETSPPSSPRPLRLDRMH REEVRDDKTTIKCETSPPSSPRPLRLDRMHK	T	S	P	P	5	2	3	0.0665586	-0.155936	-0.807068	-0.173294	-0.776413	STYX	-0.0446889	0.820194	-0.585592	0.0642547	CENTER
B2RXQ2_774 775 778 779	tr|B2RXQ2|B2RXQ2_MOUSE	B2RXQ2	774 775 778 779	0.875	SREEVRDDKTTIKCETSPPSSPRPLRLDRMH REEVRDDKTTIKCETSPPSSPRPLRLDRMHK VRDDKTTIKCETSPPSSPRPLRLDRMHKGAP RDDKTTIKCETSPPSSPRPLRLDRMHKGAPH	T	S	P	P	4	2	2	0.490261	-0.0951549	-0.177728	-0.141127	NA	STYX	0.197553	0.509799	-0.159427	0.535475	CENTER
B2RY53_141 142	tr|B2RY53|B2RY53_MOUSE,sp|Q9CPR4|RL17_MOUSE	B2RY53	141 142	0.889	RRRTYRAHGPINPYMSSPCHIEMILTEKEQI RRTYRAHGPINPYMSSPCHIEMILTEKEQIV	S	S	P	C	5	2	3	-0.126309	-0.0810244	0.312302	0.190727	1.03001	STYX	-0.103667	0.559697	0.511012	0.191106	CENTER
B2RY53_142	tr|B2RY53|B2RY53_MOUSE,sp|Q9CPR4|RL17_MOUSE	B2RY53	142	0.979	RRTYRAHGPINPYMSSPCHIEMILTEKEQIV	S	P	C	H	5	2	3	-0.126328	0.588272	0.524657	0.620893	0.918921	STYX	0.230972	0.525753	0.688157	0.0624904	CENTER
B3A2_112	sp|P13808|B3A2_MOUSE	P13808	112	0.998	TPQGPGRKPRRRPGASPTGETPTIEEGEEDE	S	P	T	G	4	2	2	-0.256137	-0.299264	0.0908686	-0.173494	NA	STYX	-0.277701	0.144583	-0.0413127	0.794751	CENTER
B3A2_144	sp|P13808|B3A2_MOUSE	P13808	144	0.998	EASEAEGFRAPPQQPSPATTPSAVQFFLQED	S	P	A	T	5	2	3	-0.432547	-0.350567	-0.572763	-0.095245	0.40564	STYX	-0.391557	0.0688626	-0.087456	0.667036	CENTER
B3A2_170	sp|P13808|B3A2_MOUSE	P13808	170	0.988	FLQEDEGAERKPERTSPSPPTQTPHQEAAPR	S	P	S	P	4	2	2	-0.0583943	0.162166	-0.502434	-0.101182	NA	STYX	0.0518859	0.754321	-0.301808	0.334354	CENTER
B3A2_172	sp|P13808|B3A2_MOUSE	P13808	172	0.995	QEDEGAERKPERTSPSPPTQTPHQEAAPRAS	S	P	P	T	4	2	2	-0.163056	0.104102	0.0108856	0.3476	NA	STYX	-0.0294772	0.885316	0.179243	0.710483	CENTER
B7XG49_350	tr|B7XG49|B7XG49_MOUSE	B7XG49	350	1	KMSPKSMKIALAGMASKSLEYIPSSPASLSR	S	K	S	L	4	2	2	-0.34418	-0.0190807	0.152879	NA	0.421531	STYX	-0.181631	0.380582	0.287205	0.502077	CENTER
B7XG49_374	tr|B7XG49|B7XG49_MOUSE	B7XG49	374	0.993	SPASLSRKEIMTVTNSRIETTGKSVGETAND	S	R	I	E	4	2	2	-0.581508	-0.264489	NA	0.154178	1.01513	STYX	-0.422998	0.0740255	0.584653	0.247409	CENTER
B7XG49_494	tr|B7XG49|B7XG49_MOUSE	B7XG49	494	0.988	NRWHKGVSHVPITKESRSSHKLSRTISTASS	S	R	S	S	4	2	2	0.170412	-0.209814	NA	0.295099	1.14746	STYX	-0.0197013	0.919718	0.721279	0.156784	CENTER
B9EJU1_141	tr|B9EJU1|B9EJU1_MOUSE	B9EJU1	141	1	ETKVSIIKEDVIDEDSARQGASSDDDDDSCI	S	A	R	Q	5	2	3	0.37608	-0.357984	0.556776	0.7278	1.41555	STYX	0.0090477	0.96001	0.90004	0.0342594	NR
B9EJU1_189 192 193	tr|B9EJU1|B9EJU1_MOUSE	B9EJU1	189 192 193	0.899	KVQEQGDQKAPDAVPSRPTTPLRAVRPEAVV EQGDQKAPDAVPSRPTTPLRAVRPEAVVEPI QGDQKAPDAVPSRPTTPLRAVRPEAVVEPIP	S	R	P	T	5	2	3	-0.146179	-0.337803	0.13446	0.0631336	-0.0293802	STYX	-0.241991	0.210505	0.0560712	0.970109	CENTER
B9EJU1_192	tr|B9EJU1|B9EJU1_MOUSE	B9EJU1	192	0.961	EQGDQKAPDAVPSRPTTPLRAVRPEAVVEPI	T	T	P	L	5	2	3	-0.84567	0.351113	0.729998	0.709776	-0.332001	STYX	-0.247278	0.693428	0.369258	0.389781	CENTER
B9EJU1_192 193	tr|B9EJU1|B9EJU1_MOUSE	B9EJU1	192 193	0.899	EQGDQKAPDAVPSRPTTPLRAVRPEAVVEPI QGDQKAPDAVPSRPTTPLRAVRPEAVVEPIP	T	T	P	L	5	2	3	-0.0945688	0.0907392	0.355992	0.287376	0.167967	STYX	-0.00191482	0.982625	0.270445	0.429229	CENTER
B9EJU1_193	tr|B9EJU1|B9EJU1_MOUSE	B9EJU1	193	0.991	QGDQKAPDAVPSRPTTPLRAVRPEAVVEPIP	T	P	L	R	5	2	3	0.0310639	0.101695	0.433132	0.180858	0.1401	STYX	0.0663794	0.66736	0.251363	0.478805	CENTER
B9EKF4_659	tr|B9EKF4|B9EKF4_MOUSE	B9EKF4	659	0.997	LTLHQRIHRVRSGYASPERGSAFNPKHSLKP	S	P	E	R	5	2	3	0.324886	-1.22738	-0.503552	0.845082	-0.192074	STYX	-0.451248	0.64637	0.0498187	0.865281	CENTER
BABA1_33	sp|Q3UI43|BABA1_MOUSE	Q3UI43	33	1	EEGEETISEPRPHTRSNPEGAEDRALGAQAS	S	N	P	E	5	2	3	0.065675	0.0511972	0.338132	0.934506	0.551315	STYX	0.0584361	0.696588	0.607985	0.100325	CENTER
BACD1_145	sp|Q8BGV7|BACD1_MOUSE	Q8BGV7	145	0.999	IEDCQLALQQKREKLSPLCLIPTVTSPREEQ	S	P	L	C	5	2	3	-0.301876	0.0137432	0.57516	-0.00972687	0.425073	STYX	-0.144067	0.477271	0.330169	0.367766	CENTER
BACH1_448	sp|P97302|BACH1_MOUSE	P97302	448	0.997	QRRSECPWLGIRISESPEPGQRTFTTLSSVN	S	P	E	P	5	2	3	-0.622056	-0.29281	-0.992988	-0.453946	0.115655	STYX	-0.457433	0.0620374	-0.44376	0.174485	CENTER
BAD_136	sp|Q61337|BAD_MOUSE	Q61337	136	1	EGMEEELSPFRGRSRSAPPNLWAAQRYGREL	S	A	P	P	5	2	3	-0.185874	0.109125	0.180743	0.251706	0.468353	STYX	-0.0383746	0.853071	0.300267	0.382701	CENTER
BAD_155	sp|Q61337|BAD_MOUSE	Q61337	155	0.999	NLWAAQRYGRELRRMSDEFEGSFKGLPRPKS	S	D	E	F	5	2	3	-0.0617045	-0.595731	0.0564163	0.0994447	0.316756	STYX	-0.328718	0.211244	0.157539	0.689789	CENTER
BAG2_20	sp|Q91YN9|BAG2_MOUSE	Q91YN9	20	0.986	KISAKAHEGRFCRSSSMADRSSRLLESLDQL	S	M	A	D	5	2	3	1.03219	-0.228596	0.609354	0.508457	-0.531534	STYX	0.401796	0.609169	0.195426	0.658046	CENTER
BAG3_274	sp|Q9JLV1|BAG3_MOUSE	Q9JLV1	274	0.998	DDWEPRPLRAASPFRSPVRGASSREGSPARS	S	P	V	R	5	2	3	-0.371207	0.449386	-0.417573	-1.00352	-0.99775	STYX	0.0390897	0.996543	-0.806283	0.0220648	CENTER
BAG3_360	sp|Q9JLV1|BAG3_MOUSE	Q9JLV1	360	0.997	QVIRREADSKPVSQKSPPPAEKVEVKVSSAP	S	P	P	P	5	2	3	0.189126	-0.211695	0.272488	0.307172	0.388289	STYX	-0.0112848	0.948086	0.32265	0.334748	CENTER
BAG3_382	sp|Q9JLV1|BAG3_MOUSE	Q9JLV1	382	0.981	VEVKVSSAPIPCPSPSPAPSAVPSPPKNVAA	S	P	A	P	4	2	2	0.197276	-0.164214	-0.0937477	NA	-0.102163	STYX	0.0165312	0.947011	-0.0979554	0.665042	CENTER
BAG3_390	sp|Q9JLV1|BAG3_MOUSE	Q9JLV1	390	0.996	PIPCPSPSPAPSAVPSPPKNVAAEQKAAPSP	S	P	P	K	5	2	3	0.0588947	-0.00942211	-0.695606	-0.515615	-0.535065	STYX	0.0247363	0.847161	-0.582095	0.0464682	CENTER
BAG3_404	sp|Q9JLV1|BAG3_MOUSE	Q9JLV1	404	1	PSPPKNVAAEQKAAPSPAPAEPAAPKSGEAE	S	P	A	P	5	2	3	0.111813	-0.113889	-0.052952	0.444249	0.132966	STYX	-0.00103795	0.983522	0.174754	0.672242	CENTER
BAG3_560	sp|Q9JLV1|BAG3_MOUSE	Q9JLV1	560	0.999	KDPQTESQQLEAKAATPPNPSNPADSAGNLV	T	P	P	N	5	2	3	-0.357154	-0.244267	-0.112105	-0.222324	-0.196944	STYX	-0.300711	0.126251	-0.177124	0.410563	CENTER
BAG4_175	sp|Q8CI61|BAG4_MOUSE	Q8CI61	175	0.998	YTQSNYSTEVPNTYRSPGNSPTPMSRWMYSQ	S	P	G	N	4	2	2	0.0321518	0.385182	-0.367464	0.0886323	NA	STYX	0.208667	0.343324	-0.139416	0.597637	CENTER
BAG4_179	sp|Q8CI61|BAG4_MOUSE	Q8CI61	179	0.998	NYSTEVPNTYRSPGNSPTPMSRWMYSQQDCP	S	P	T	P	5	2	3	-0.181314	0.270841	-0.311913	-0.231993	-0.00709044	STYX	0.0447631	0.870407	-0.183665	0.403035	CENTER
BAG5_264	sp|Q8CI32|BAG5_MOUSE	Q8CI32	264	0.993	INKLLKYLDLEEEADSTHAFDLGQNHSIIKI	S	T	H	A	4	2	2	-0.571094	-0.357855	NA	0.278205	0.543762	STYX	-0.464475	0.0520962	0.410984	0.327921	CENTER
BAG6_1102 1103	sp|Q9Z1R2|BAG6_MOUSE	Q9Z1R2	1102 1103	0.888	EAVSRAAKAAGARPLTSPESLSRDLEAPEVQ AVSRAAKAAGARPLTSPESLSRDLEAPEVQE	T	S	P	E	5	2	3	-0.600851	0.137221	0.83024	0.607899	0.540571	STYX	-0.231815	0.492823	0.65957	0.0692018	CENTER
BAG6_1103	sp|Q9Z1R2|BAG6_MOUSE	Q9Z1R2	1103	0.99	AVSRAAKAAGARPLTSPESLSRDLEAPEVQE	S	P	E	S	5	2	3	-0.45665	0.0822267	0.815872	0.648593	0.754005	STYX	-0.187212	0.469009	0.73949	0.0457949	CENTER
BAG6_1138 1139	sp|Q9Z1R2|BAG6_MOUSE	Q9Z1R2	1138 1139	0.897	QLRSDIQKRLQEDPNYSPQRFPNAHRAFADD LRSDIQKRLQEDPNYSPQRFPNAHRAFADDP	Y	S	P	Q	5	2	3	0.00168187	0.101769	-0.0251883	-0.0901266	-0.353562	STYX	0.0517253	0.732871	-0.156292	0.467521	CENTER
BAG6_1139	sp|Q9Z1R2|BAG6_MOUSE	Q9Z1R2	1139	0.996	LRSDIQKRLQEDPNYSPQRFPNAHRAFADDP	S	P	Q	R	5	2	3	0.0693221	0.139053	-0.00516637	-0.11037	-0.365416	STYX	0.104187	0.523772	-0.160318	0.460678	CENTER
BAG6_123	sp|Q9Z1R2|BAG6_MOUSE	Q9Z1R2	123	1	THGGAPLPGTRGPGASVHDRNANSYVMVGTF	S	V	H	D	5	2	3	0.125863	-0.377489	1.27306	0.369231	1.02851	STYX	-0.125813	0.605078	0.890266	0.0374211	NR
BAG6_509	sp|Q9Z1R2|BAG6_MOUSE	Q9Z1R2	509	1	PGFPTAPTRVVIARPTPPQARPSHPGGPPVS	T	P	P	Q	4	2	2	-0.0779632	0.210231	0.605604	0.340815	NA	STYX	0.0661337	0.729146	0.47321	0.263687	CENTER
BAG6_985	sp|Q9Z1R2|BAG6_MOUSE	Q9Z1R2	985	0.973	QTLPEEPMEVQGAERTSPEPQRENASPAPGT	T	S	P	E	4	2	2	0.276567	-0.0944688	NA	0.158135	0.195679	STYX	0.0910492	0.675486	0.176907	0.696062	CENTER
BAG6_985 986	sp|Q9Z1R2|BAG6_MOUSE	Q9Z1R2	985 986	0.898	QTLPEEPMEVQGAERTSPEPQRENASPAPGT TLPEEPMEVQGAERTSPEPQRENASPAPGTT	T	S	P	E	5	2	3	0.0545538	-0.259807	0.218059	0.190384	0.248163	STYX	-0.102626	0.608302	0.218868	0.531742	CENTER
BAG6_986	sp|Q9Z1R2|BAG6_MOUSE	Q9Z1R2	986	0.99	TLPEEPMEVQGAERTSPEPQRENASPAPGTT	S	P	E	P	5	2	3	-0.0991347	-0.202356	0.345468	0.2582	1.47749	STYX	-0.150745	0.402603	0.693721	0.125341	CENTER
BAG6_995	sp|Q9Z1R2|BAG6_MOUSE	Q9Z1R2	995	0.999	QGAERTSPEPQRENASPAPGTTAEEAMSRGP	S	P	A	P	5	2	3	-0.0650003	-0.0138654	0.000362453	0.136264	0.0727636	STYX	-0.0394328	0.850688	0.0697968	0.928034	CENTER
BAHD1_182	sp|Q497V6|BAHD1_MOUSE	Q497V6	182	1	KRPRLGDLGEGSRDLSPELAPDEGARRDGDP	S	P	E	L	5	2	3	-0.665639	-0.0353694	-1.25885	0.0418494	0.0533335	STYX	-0.350504	0.228022	-0.38789	0.349135	CENTER
BAIP2_326	sp|Q8BKX1|BAIP2_MOUSE	Q8BKX1	326	0.998	YNPWADRKAAQPKSLSPPQSQSKLSDSYSNT	S	P	P	Q	5	2	3	0.127394	0.288219	0.463243	0.462166	0.252981	STYX	0.207807	0.279301	0.392796	0.245762	CENTER
BAIP2_367	sp|Q8BKX1|BAIP2_MOUSE	Q8BKX1	367	0.989	NSYATTENKTLPRSSSMAAGLERNGRMRVKA	S	M	A	A	5	2	3	-0.0917173	-0.266948	-0.392559	-0.721739	-0.475659	STYX	-0.179333	0.334401	-0.529986	0.063831	CENTER
BAIP2_453 454 455 456	sp|Q8BKX1|BAIP2_MOUSE	Q8BKX1	453 454 455 456	0.899	SDGSDRLHMSLQQGKSSSTGNLLDKDDLALP DGSDRLHMSLQQGKSSSTGNLLDKDDLALPP GSDRLHMSLQQGKSSSTGNLLDKDDLALPPP SDRLHMSLQQGKSSSTGNLLDKDDLALPPPD	S	S	S	T	5	2	3	-0.498459	-0.195164	-0.0832993	-0.64689	-0.549785	STYX	-0.346812	0.11683	-0.426658	0.13053	CENTER
BAIP2_455	sp|Q8BKX1|BAIP2_MOUSE	Q8BKX1	455	0.975	GSDRLHMSLQQGKSSSTGNLLDKDDLALPPP	S	T	G	N	4	2	2	-0.387513	-0.170199	NA	-0.796294	-0.716989	STYX	-0.278856	0.164035	-0.756642	0.0585424	CENTER
BAIP3_215	sp|Q80TT2|BAIP3_MOUSE,sp|Q8K3A9|MEPCE_MOUSE	Q80TT2	215	0.974	QKEQRFGFRKGSKRSSPLPAKCIQVTEVKNS	S	P	L	P	5	2	3	0.0171704	0.310992	-0.864913	-0.297843	-0.017071	STYX	0.164081	0.419901	-0.393276	0.189	CENTER
BAKOR_11	sp|Q8CDJ3|BAKOR_MOUSE	Q8CDJ3	11	0.998	_____MASPSGKGSWTPEAPGFGPRALARDL	T	P	E	A	5	2	3	-0.469988	0.0725271	-0.469305	-0.542843	-0.280131	STYX	-0.19873	0.444101	-0.43076	0.106647	CENTER
BAP18_96	sp|Q9DCT6|BAP18_MOUSE	Q9DCT6	96	0.999	KRKVYEDSGIPLPAESPKKGPKKMTSGVLSP	S	P	K	K	5	2	3	0.161099	0.214695	-0.197718	-0.454074	-0.102882	STYX	0.187897	0.303484	-0.251558	0.292982	CENTER
BASP1_131 132	sp|Q91XV3|BASP1_MOUSE	Q91XV3	131 132	0.874	AAGGEAPKAGEASAESTGAADGAAPEEGEAK AGGEAPKAGEASAESTGAADGAAPEEGEAKK	S	T	G	A	5	2	3	-0.377626	-0.316388	0.0169814	-0.615894	-0.422988	STYX	-0.347007	0.0897434	-0.340634	0.206805	CENTER
BASP1_173	sp|Q91XV3|BASP1_MOUSE	Q91XV3	173	0.984	AKSDAAPAASDSKPSSAEPAPSSKETPAASE	S	A	E	P	5	2	3	0.63754	-0.241361	-0.277997	-0.587548	-0.636248	STYX	0.19809	0.714145	-0.500598	0.077315	CENTER
BASP1_179 180	sp|Q91XV3|BASP1_MOUSE	Q91XV3	179 180	0.86	PAASDSKPSSAEPAPSSKETPAASEAPSSAA AASDSKPSSAEPAPSSKETPAASEAPSSAAK	S	S	K	E	4	2	2	0.371281	-0.0578302	-0.139123	-0.302961	NA	STYX	0.156725	0.506192	-0.221042	0.427797	CENTER
BASP1_31	sp|Q91XV3|BASP1_MOUSE	Q91XV3	31	0.999	DEKAKDKDKKAEGAGTEEEGTPKESEPQAAA	T	E	E	E	5	2	3	0.227518	0.189161	-0.494269	-0.387756	0.0121394	STYX	0.208339	0.266018	-0.289962	0.251218	CENTER
BASP1_36	sp|Q91XV3|BASP1_MOUSE	Q91XV3	36	0.999	DKDKKAEGAGTEEEGTPKESEPQAAADATEV	T	P	K	E	5	2	3	0.343599	-0.387415	-0.632651	-0.484119	0.364197	STYX	-0.0219083	0.892342	-0.250858	0.35157	CENTER
BAZ1A_1339	sp|O88379|BAZ1A_MOUSE	O88379	1339	0.994	TETRSLRVGSRSTRHSPSALQDVFVELLSPH	S	P	S	A	5	2	3	0.145129	0.767336	0.788871	0.204713	0.37706	STYX	0.456232	0.134312	0.456881	0.2053	CENTER
BAZ1A_1366	sp|O88379|BAZ1A_MOUSE	O88379	1366	0.99	LSPHSKRRGRKGADHTPEHSPSFTNFRVSTS	T	P	E	H	5	2	3	0.283847	0.359798	0.62542	0.446829	0.400625	STYX	0.321822	0.136432	0.490958	0.152889	CENTER
BAZ1A_1415 1416	sp|O88379|BAZ1A_MOUSE	O88379	1415 1416	0.898	HSESKRRGRKRQSTESSPVPLNRRSSGRQGG SESKRRGRKRQSTESSPVPLNRRSSGRQGGV	S	S	P	V	5	2	3	0.42259	0.396487	0.351532	1.00754	-0.0973794	STYX	0.409538	0.0883472	0.420565	0.326115	CENTER
BAZ1A_1416	sp|O88379|BAZ1A_MOUSE	O88379	1416	0.994	SESKRRGRKRQSTESSPVPLNRRSSGRQGGV	S	P	V	P	5	2	3	0.00874358	0.445695	0.0925721	0.442202	0.307207	STYX	0.227219	0.349144	0.28066	0.421613	CENTER
BAZ1A_732	sp|O88379|BAZ1A_MOUSE	O88379	732	0.999	ENKNIEQKDLDPDVVTEDEDDPGSHKRSRRG	T	E	D	E	5	2	3	0.658096	0.00393213	0.0467839	0.169214	-0.0301658	STYX	0.331014	0.286923	0.0619439	0.953492	CENTER
BAZ1B_1338	sp|Q9Z277|BAZ1B_MOUSE	Q9Z277	1338	1	VDDLVLQTKRISRRQSLELQKCEDILHKLVK	S	L	E	L	5	2	3	0.106628	0.0897295	-0.699496	-0.548873	-0.501614	STYX	0.0981787	0.541213	-0.583328	0.0462739	CENTER
BAZ1B_1464	sp|Q9Z277|BAZ1B_MOUSE	Q9Z277	1464	0.998	KRRKFPDRLADDEGDSDSESVGQSRGRRQKK	S	D	S	E	5	2	3	0.0706717	0.0541265	-0.0762449	-0.271558	-0.130389	STYX	0.0623991	0.680511	-0.159398	0.451642	CENTER
BAZ2A_1042	sp|Q91YE5|BAZ2A_MOUSE	Q91YE5	1042	0.998	DGLGRRRSSRIMEETSGIEEEEEEENTTAVH	S	G	I	E	5	2	3	-0.0127782	-0.0273902	-0.0204962	0.190781	0.221326	STYX	-0.0200842	0.945667	0.130537	0.760227	CENTER
BAZ2A_1383	sp|Q91YE5|BAZ2A_MOUSE	Q91YE5	1383	0.998	GTPKRLSGDSEEMSQSPTGLGQPKRRGRPPS	S	P	T	G	5	2	3	0.398245	0.398217	0.310228	0.317319	0.0999264	STYX	0.398231	0.0926326	0.242491	0.485179	CENTER
BAZ2A_1734	sp|Q91YE5|BAZ2A_MOUSE	Q91YE5	1734	0.985	TQRPGFPKRGQKRKSSFPLTFPEGDSRRRML	S	F	P	L	5	2	3	0.353346	0.0921381	-0.229042	-0.0763561	0.10062	STYX	0.222742	0.282162	-0.0682595	0.675498	CENTER
BAZ2A_540	sp|Q91YE5|BAZ2A_MOUSE	Q91YE5	540	1	VAVSGSGDVLKRRIATPEEVRLPLQHGWRRE	T	P	E	E	5	2	3	0.197777	0.555633	0.39362	0.188514	0.50678	STYX	0.376705	0.131323	0.362971	0.289147	CENTER
BAZ2A_720	sp|Q91YE5|BAZ2A_MOUSE	Q91YE5	720	0.997	NKKKMRQKVQRGESQTPVQGQARNKRKQDTK	T	P	V	Q	4	2	2	0.536655	0.16477	0.133269	0.825507	NA	STYX	0.350713	0.152941	0.479388	0.311021	CENTER
BBOF1_519	sp|Q3V079|BBOF1_MOUSE	Q3V079	519	0.999	FITQQAPVSDSNRMVSPDVIPQGLQDSDIA_	S	P	D	V	5	2	3	-0.563489	-0.0288178	0.390355	0.160956	0.891479	STYX	-0.296154	0.259352	0.48093	0.198968	CENTER
BBX_242	sp|Q8VBW5|BBX_MOUSE	Q8VBW5	242	0.998	TCRPDISESPELRQKSPLFQFAEISSRTSHP	S	P	L	F	5	2	3	-0.598414	-0.165525	-0.25102	-1.08073	-0.763366	STYX	-0.381969	0.118095	-0.698373	0.0411129	CENTER
BBX_576	sp|Q8VBW5|BBX_MOUSE	Q8VBW5	576	0.966	SVPGEVPEGIKAEPLTPTEDALPPSLPGQAK	T	P	T	E	5	2	3	-0.106987	-0.184873	-0.277998	-0.399362	-0.174559	STYX	-0.14593	0.413316	-0.283973	0.238033	CENTER
BBX_700 701	sp|Q8VBW5|BBX_MOUSE	Q8VBW5	700 701	0.888	KLDEEFEKKFNSLPQYSPITFDRKCVSTPRK LDEEFEKKFNSLPQYSPITFDRKCVSTPRKK	Y	S	P	I	5	2	3	-0.859242	0.327928	0.449158	0.53699	0.357325	STYX	-0.265657	0.669573	0.447824	0.187943	CENTER
BBX_701	sp|Q8VBW5|BBX_MOUSE	Q8VBW5	701	0.993	LDEEFEKKFNSLPQYSPITFDRKCVSTPRKK	S	P	I	T	5	2	3	-0.335669	0.177355	0.577927	0.62474	0.786036	STYX	-0.0791571	0.736347	0.662901	0.0663698	CENTER
BBX_811	sp|Q8VBW5|BBX_MOUSE	Q8VBW5	811	0.999	KTKITHLVRTADGRVSPAGGTLDDKPKEQLQ	S	P	A	G	5	2	3	-0.0459791	0.2167	-0.186118	-0.0926944	-0.406979	STYX	0.0853607	0.644269	-0.228597	0.327603	CENTER
BCAR1_143	sp|Q61140|BCAR1_MOUSE	Q61140	143	0.998	QQGLYQAPGPNPQFQSPPAKQTSTFSKQTPH	S	P	P	A	5	2	3	0.232408	0.0560871	-0.120082	-0.59311	-0.319447	STYX	0.144248	0.428712	-0.344213	0.187547	CENTER
BCAR1_432	sp|Q61140|BCAR1_MOUSE	Q61140	432	0.997	PPPAEREAPTDGKRLSASSTGSTRSSQSASS	S	A	S	S	5	2	3	-0.192367	0.14044	-0.681182	-1.57326	-1.43349	STYX	-0.0259635	0.90508	-1.22931	0.00751433	NR
BCAS3_518	sp|Q8CCN5|BCAS3_MOUSE	Q8CCN5	518	0.999	SYNNFTNNNPGNPRLSPLPSLMVVTPLAQIK	S	P	L	P	4	2	2	-0.220063	0.119796	0.0257319	0.185094	NA	STYX	-0.0501335	0.809971	0.105413	0.858916	CENTER
BCAS3_570	sp|Q8CCN5|BCAS3_MOUSE	Q8CCN5	570	0.998	FSIKAPCKVKSPPQISPSKSMGGEFCVAAVF	S	P	S	K	5	2	3	0.264925	0.428791	0.214775	0.161094	-0.0531139	STYX	0.346858	0.125639	0.107585	0.823361	CENTER
BCAS3_869	sp|Q8CCN5|BCAS3_MOUSE	Q8CCN5	869	0.996	SEEGLRERLADAMAESPSRDVVGSGTELQRE	S	P	S	R	5	2	3	-0.0537633	0.33774	-0.28212	-0.4662	0.179522	STYX	0.141988	0.528032	-0.189599	0.41776	CENTER
BCAS3_886	sp|Q8CCN5|BCAS3_MOUSE	Q8CCN5	886	0.999	SRDVVGSGTELQREGSIETLSNSSGSTSGSI	S	I	E	T	5	2	3	0.162889	-0.112747	-0.272132	-0.368676	-0.394178	STYX	0.025071	0.884339	-0.344995	0.166069	CENTER
BCD1_39	sp|Q3UFB2|BCD1_MOUSE	Q3UFB2	39	1	PRPAAGGEGARDLDGSPEAGDGEERNGLAGT	S	P	E	A	5	2	3	-0.461315	0.0606112	-0.17265	-0.483463	-0.647995	STYX	-0.200352	0.428975	-0.434703	0.115888	CENTER
BCKD_31	sp|O55028|BCKD_MOUSE	O55028	31	0.995	SLWPLLGSSLSLRARSTSATDTHHVELARER	S	T	S	A	5	2	3	-0.139688	0.133427	-0.816175	-0.602223	-0.299746	STYX	-0.0031307	0.999596	-0.572715	0.0577034	CENTER
BCKD_31 32 33	sp|O55028|BCKD_MOUSE	O55028	31 32 33	0.877	SLWPLLGSSLSLRARSTSATDTHHVELARER LWPLLGSSLSLRARSTSATDTHHVELARERS WPLLGSSLSLRARSTSATDTHHVELARERSK	S	T	S	A	5	2	3	-0.446379	-0.0653	-0.375822	-0.425063	-0.120076	STYX	-0.255839	0.250243	-0.306987	0.215615	CENTER
BCL6_458	sp|P41183|BCL6_MOUSE	P41183	458	0.998	QASRLNNLVNRSLAGSPRSSSESHSPLYMHP	S	P	R	S	4	2	2	0.153919	0.0523102	NA	-0.25788	-0.078234	STYX	0.103115	0.53438	-0.168057	0.522129	CENTER
BCL7C_126	sp|O08664|BCL7C_MOUSE	O08664	126	0.985	AEPSPGGTPQPSRPGSPTGPPEVITEDTQPP	S	P	T	G	4	2	2	0.0224098	-0.0373212	0.572489	-0.278751	NA	STYX	-0.0074557	0.995734	0.146869	0.850599	CENTER
BCL9_291	sp|Q9D219|BCL9_MOUSE	Q9D219	291	0.979	RESPGVENKLIPPVGSPGSSTPLPPDGTGPN	S	P	G	S	5	2	3	-0.896741	-0.50089	-0.189486	-0.176548	-0.0770993	STYX	-0.698816	0.0268574	-0.147711	0.475271	CENTER
BCL9_686	sp|Q9D219|BCL9_MOUSE	Q9D219	686	0.996	GSNPIFPRIPVEGPLSPSRGDFPKGMPPQIG	S	P	S	R	5	2	3	-0.497165	0.361167	-0.653309	-0.658655	-0.918272	STYX	-0.0679991	0.82177	-0.743412	0.0225452	CENTER
BCL9L_1014	sp|Q67FY2|BCL9L_MOUSE	Q67FY2	1014	0.998	VPSPGWVASPKTAMPSPGVSQNKQPPLSINS	S	P	G	V	5	2	3	-0.174481	0.688996	-0.824267	-1.01477	-0.436193	STYX	0.257257	0.580792	-0.758412	0.0251287	CENTER
BCL9L_116	sp|Q67FY2|BCL9L_MOUSE	Q67FY2	116	0.996	VSPFSSLKGKVKRERSVSVDSGEQREAGTPS	S	V	S	V	5	2	3	-0.187374	-0.0163657	-0.151364	-1.00245	-0.474775	STYX	-0.10187	0.584112	-0.542862	0.0876858	CENTER
BCL9L_118	sp|Q67FY2|BCL9L_MOUSE	Q67FY2	118	0.973	PFSSLKGKVKRERSVSVDSGEQREAGTPSLD	S	V	D	S	5	2	3	0.700682	0.324073	-0.233158	-0.715595	-0.729679	STYX	0.512378	0.0725268	-0.559477	0.0636996	CENTER
BCL9L_21	sp|Q67FY2|BCL9L_MOUSE	Q67FY2	21	0.998	NKTRLPHPRRREAPGSPPLSPRGHCPPAPAK	S	P	P	L	5	2	3	0.0973112	0.128598	-0.398201	-0.791694	-0.774352	STYX	0.112954	0.490838	-0.654749	0.0365656	CENTER
BCL9L_747	sp|Q67FY2|BCL9L_MOUSE	Q67FY2	747	0.999	GTPMGIEFGGGRGLLSPPMGQSGLREVDPPM	S	P	P	M	5	2	3	-0.35871	0.31519	-0.480611	-0.63452	-0.316148	STYX	-0.0217601	0.894211	-0.477093	0.0840716	CENTER
BCLA3_139	sp|A2AG58|BCLA3_MOUSE	A2AG58	139	0.994	EHERDCYIPTVQGRYTPDDHRGRGRGSGRGE	T	P	D	D	5	2	3	0.553592	-0.124671	-0.226309	0.239424	-0.337543	STYX	0.21446	0.537123	-0.108143	0.577598	CENTER
BCLA3_205	sp|A2AG58|BCLA3_MOUSE	A2AG58	205	0.999	DELRHQRVQEESYPQSPRRGSEDFGTRNPFQ	S	P	R	R	5	2	3	-0.044348	-0.0509584	-0.314786	-0.397172	-0.88996	STYX	-0.0476532	0.814947	-0.533973	0.0743616	CENTER
BCLA3_592	sp|A2AG58|BCLA3_MOUSE	A2AG58	592	0.993	KERLQNEDENIFHMASPTERNHQSPSFSKVK	S	P	T	E	5	2	3	0.149907	-0.0933232	-0.534048	-0.690639	-0.313995	STYX	0.0282917	0.861907	-0.512894	0.0716456	CENTER
BCLF1_177	sp|Q8K019|BCLF1_MOUSE	Q8K019	177	1	QEKQTKKAEGEPQEESPLKSKSQEEPKDTFE	S	P	L	K	5	2	3	0.684863	0.148724	-0.572268	-0.189486	-0.441679	STYX	0.416794	0.140902	-0.401144	0.132088	CENTER
BCLF1_183	sp|Q8K019|BCLF1_MOUSE	Q8K019	183	0.989	KAEGEPQEESPLKSKSQEEPKDTFEHDPSES	S	Q	E	E	5	2	3	0.184712	0.906687	0.22361	0.283733	0.368266	STYQ	0.5457	0.105209	0.29187	0.38722	CENTER
BCLF1_221	sp|Q8K019|BCLF1_MOUSE	Q8K019	221	0.998	ATSGDIWPGLSAYDNSPRSPHSPSPIATPPS	S	P	R	S	5	2	3	-0.323131	0.157795	0.0272798	-0.0619613	0.15171	STYX	-0.082668	0.719947	0.0390095	0.978789	CENTER
BCLF1_283 284 289	sp|Q8K019|BCLF1_MOUSE	Q8K019	283 284 289	0.893	PERSGSGSVGNGSSRYSPSQNSPIHHIPSRR ERSGSGSVGNGSSRYSPSQNSPIHHIPSRRS GSVGNGSSRYSPSQNSPIHHIPSRRSPAKTI	Y	S	P	S	5	2	3	0.0811148	-0.0894017	-0.35899	0.195989	-0.38335	STYX	-0.00414347	0.991873	-0.182117	0.425944	CENTER
BCLF1_289	sp|Q8K019|BCLF1_MOUSE	Q8K019	289	0.999	GSVGNGSSRYSPSQNSPIHHIPSRRSPAKTI	S	P	I	H	5	2	3	-0.0845999	0.0145568	0.0751814	-0.12008	-0.105897	STYX	-0.0350216	0.866686	-0.050265	0.723119	CENTER
BCLF1_305	sp|Q8K019|BCLF1_MOUSE	Q8K019	305	0.997	PIHHIPSRRSPAKTITPQNAPREESRGRSSF	T	P	Q	N	5	2	3	0.96309	0.426699	0.404363	0.184991	-0.293206	STYX	0.694894	0.0463	0.0987161	0.871215	CENTER
BCLF1_319	sp|Q8K019|BCLF1_MOUSE	Q8K019	319	0.99	ITPQNAPREESRGRSSFYPEGDQETAKTGKF	S	F	Y	P	5	2	3	-0.0829776	-0.0587193	-0.295405	-0.436754	0.25903	STYX	-0.0708484	0.704929	-0.15771	0.47905	CENTER
BCLF1_339	sp|Q8K019|BCLF1_MOUSE	Q8K019	339	0.97	GDQETAKTGKFLKRFTDEESRVFLLDRGNIR	T	D	E	E	5	2	3	0.629316	0.285171	0.122939	0.304154	0.138254	STYX	0.457244	0.0870102	0.188449	0.608388	CENTER
BCLF1_395	sp|Q8K019|BCLF1_MOUSE	Q8K019	395	0.999	DYFSDKESAKQKFHDSEGDDTEETEDYRQFR	S	E	G	D	5	2	3	-0.0821114	-0.164647	-0.317657	-0.0837801	-0.0891381	STYX	-0.123379	0.487233	-0.163525	0.447672	CENTER
BCLF1_412	sp|Q8K019|BCLF1_MOUSE	Q8K019	412	1	GDDTEETEDYRQFRKSVLADQGKSFATSSHR	S	V	L	A	5	2	3	-0.178462	0.280175	-0.0736753	-0.0572873	0.197433	STYX	0.0508565	0.853865	0.0221569	0.927148	CENTER
BCLF1_448	sp|Q8K019|BCLF1_MOUSE	Q8K019	448	1	GPKYKSKVSLKGNRESDGFREEKNYKLKETA	S	D	G	F	5	2	3	0.590852	0.401399	-0.10786	0.00313533	0.0140387	STYX	0.496126	0.0655659	-0.0302287	0.780128	CENTER
BCLF1_494	sp|Q8K019|BCLF1_MOUSE	Q8K019	494	1	EDKGSDRITVKKEVQSPEQVKSEKLKELFDY	S	P	E	Q	5	2	3	0.22109	0.186223	-0.350899	-0.0276495	-0.38401	STYX	0.203657	0.274083	-0.254186	0.287986	CENTER
BCLF1_509 510	sp|Q8K019|BCLF1_MOUSE	Q8K019	509 510	0.899	SPEQVKSEKLKELFDYSPPLHKSLDAREKSI PEQVKSEKLKELFDYSPPLHKSLDAREKSIF	Y	S	P	P	5	2	3	-0.168533	0.338505	-0.15123	-0.147063	-0.287639	STYX	0.0849862	0.770794	-0.195311	0.377009	CENTER
BCLF1_510	sp|Q8K019|BCLF1_MOUSE	Q8K019	510	0.996	PEQVKSEKLKELFDYSPPLHKSLDAREKSIF	S	P	P	L	5	2	3	-0.0807616	0.39587	-0.0454498	-0.228388	-0.427417	STYX	0.157554	0.538534	-0.233752	0.320782	CENTER
BCLF1_529	sp|Q8K019|BCLF1_MOUSE	Q8K019	529	1	HKSLDAREKSIFREESPLRIKMIASDSHRPE	S	P	L	R	5	2	3	-0.169875	0.29519	-0.268917	-0.386538	-0.410274	STYX	0.0626575	0.817395	-0.355243	0.157056	CENTER
BCLF1_646	sp|Q8K019|BCLF1_MOUSE	Q8K019	646	1	TSYQKATEEHSTRQKSPEIHRRIDISPSALR	S	P	E	I	5	2	3	1.09596	-0.0468755	0.552513	0.316834	-0.375911	STYX	0.524543	0.303061	0.164479	0.723365	CENTER
BCLF1_656	sp|Q8K019|BCLF1_MOUSE	Q8K019	656	0.996	STRQKSPEIHRRIDISPSALRKHTRLAGEER	S	P	S	A	5	2	3	-0.251592	0.165612	-0.182397	-0.172106	-0.196896	STYX	-0.0429896	0.834663	-0.1838	0.396831	CENTER
BCLF1_688	sp|Q8K019|BCLF1_MOUSE	Q8K019	688	1	FKEEIQKGDKKLRCDSADLRHDIDRRRKERS	S	A	D	L	5	2	3	0.107395	0.162324	-0.0127991	0.241564	0.172086	STYX	0.13486	0.42799	0.133617	0.75021	CENTER
BCLF1_759	sp|Q8K019|BCLF1_MOUSE	Q8K019	759	0.994	ERDHSRSSSSSASPSSPSSREEKESKKEREE	S	P	S	S	4	2	2	0.956876	0.282817	0.267631	-0.332979	NA	STYX	0.619846	0.0700029	-0.032674	0.820002	CENTER
BCORL_1474	sp|A2AQH4|BCORL_MOUSE	A2AQH4	1474	0.995	TPSKYRSAGPEEASESPTARQIPPEARRLIV	S	P	T	A	5	2	3	-0.122674	0.0905071	-0.0551981	-0.314908	-0.730911	STYX	-0.0160835	0.94943	-0.367006	0.187043	CENTER
BCR_356	sp|Q6PAJ1|BCR_MOUSE	Q6PAJ1	356	0.986	TSSEEDFSSGQSSRVSPSPTTYRMFRDKSRS	S	P	S	P	5	2	3	0.123378	0.120324	-0.565179	-0.736627	-0.0121888	STYX	0.121851	0.460553	-0.437998	0.136522	CENTER
BCR_697	sp|Q6PAJ1|BCR_MOUSE	Q6PAJ1	697	0.994	NFLSSINEEITPRRQSMTVKKGEHRQLLKDS	S	M	T	V	5	2	3	0.410849	0.0656544	0.0505409	-1.2267	-0.512602	STYX	0.238252	0.284789	-0.562922	0.122157	CENTER
BD1L1_1071	sp|E9Q6J5|BD1L1_MOUSE	E9Q6J5	1071	0.995	TEKKLSRRLCENRRGSTSQEMAKEDKLVANM	S	T	S	Q	5	2	3	1.12714	-0.19759	-0.37089	-0.337742	-0.333546	STYX	0.464776	0.550041	-0.347393	0.162588	CENTER
BD1L1_1071 1072 1073	sp|E9Q6J5|BD1L1_MOUSE	E9Q6J5	1071 1072 1073	0.896	TEKKLSRRLCENRRGSTSQEMAKEDKLVANM EKKLSRRLCENRRGSTSQEMAKEDKLVANMS KKLSRRLCENRRGSTSQEMAKEDKLVANMSG	S	T	S	Q	5	2	3	0.793488	-0.23966	-0.357357	-0.171054	-0.5711	STYX	0.276914	0.667278	-0.366504	0.161407	CENTER
BD1L1_1678 1679	sp|E9Q6J5|BD1L1_MOUSE	E9Q6J5	1678 1679	0.866	GAVTSAGTEIRAGSLSSEDVDGSQENRIQVG AVTSAGTEIRAGSLSSEDVDGSQENRIQVGP	S	S	E	D	5	2	3	-0.27862	0.0515591	-0.29516	-0.376522	-0.39843	STYX	-0.113531	0.577635	-0.356704	0.155162	CENTER
BD1L1_2001	sp|E9Q6J5|BD1L1_MOUSE	E9Q6J5	2001	1	VLVSGEVPECEVGHMSPRKNEECDGLMASTA	S	P	R	K	5	2	3	0.123085	-0.00370013	-0.107578	-0.220867	-0.0912125	STYX	0.0596923	0.700253	-0.139886	0.493997	CENTER
BD1L1_240	sp|E9Q6J5|BD1L1_MOUSE	E9Q6J5	240	0.997	AKVSERTSRKLSSQPSTDVSTDKERGSEDAT	S	T	D	V	5	2	3	-0.120446	0.186583	-0.241236	-0.794025	-0.840142	STYX	0.0330683	0.864031	-0.625134	0.0506774	CENTER
BD1L1_2554	sp|E9Q6J5|BD1L1_MOUSE	E9Q6J5	2554	0.999	LPTKSDHSGTWTSEGSPEKMGHVAGARQSFH	S	P	E	K	4	2	2	-0.279392	0.984981	NA	-0.187482	0.338859	STYX	0.352794	0.694342	0.0756885	0.949512	CENTER
BD1L1_2840 2841	sp|E9Q6J5|BD1L1_MOUSE	E9Q6J5	2840 2841	0.895	KEDSKTETDITTVEQSSPSGKLKVSQADESN EDSKTETDITTVEQSSPSGKLKVSQADESNK	S	S	P	S	5	2	3	0.447383	-0.0598319	-0.102042	0.267336	0.376258	STYX	0.193775	0.46158	0.180517	0.646514	CENTER
BD1L1_2888	sp|E9Q6J5|BD1L1_MOUSE	E9Q6J5	2888	0.997	EKTASMRLRGRKPKRSLTSSDDAESSEPERK	S	L	T	S	5	2	3	-0.03515	-0.0927168	-0.343041	0.340666	-0.166151	STYX	-0.0639334	0.736856	-0.0561756	0.702976	CENTER
BD1L1_2898	sp|E9Q6J5|BD1L1_MOUSE	E9Q6J5	2898	0.993	RKPKRSLTSSDDAESSEPERKRQKSVSETSE	S	E	P	E	5	2	3	0.192988	0.0887271	0.0596784	-0.435988	-0.674023	STYX	0.140858	0.420096	-0.350111	0.206805	CENTER
BD1L1_2989	sp|E9Q6J5|BD1L1_MOUSE	E9Q6J5	2989	0.997	KLAKEKLSTSEKVSKSPPLGRSKAQLSPSVK	S	P	P	L	5	2	3	0.18704	0.377395	-0.434032	-0.667227	-0.812518	STYX	0.282218	0.18235	-0.637926	0.0382142	CENTER
BD1L1_3000	sp|E9Q6J5|BD1L1_MOUSE	E9Q6J5	3000	0.996	KVSKSPPLGRSKAQLSPSVKRKREVSPPGAR	S	P	S	V	5	2	3	0.376627	0.5963	-0.185076	-0.124131	-0.647989	STYX	0.486464	0.0690344	-0.319065	0.228496	CENTER
BD1L1_3010	sp|E9Q6J5|BD1L1_MOUSE	E9Q6J5	3010	1	SKAQLSPSVKRKREVSPPGARTRGQQKVDEN	S	P	P	G	5	2	3	0.213155	0.203164	-0.262963	-0.258737	-0.449919	STYX	0.20816	0.266067	-0.323873	0.189553	CENTER
BET1_50	sp|O35623|BET1_MOUSE	O35623	50	0.997	LTESLRSKVTAIKSLSIEIGHEVKNQNKLLA	S	I	E	I	5	2	3	-0.0437873	-0.19138	-0.623436	-0.860383	-0.960758	STYX	-0.117583	0.523259	-0.814859	0.0173036	CENTER
BI2L1_261	sp|Q9DBJ3|BI2L1_MOUSE	Q9DBJ3	261	0.999	IKTPISTPVSGTPQPSPMIERSKMIGKDYDT	S	P	M	I	5	2	3	0.0448168	-0.0683587	-0.235984	-0.664758	-0.315753	STYX	-0.0117709	0.979662	-0.405498	0.133135	CENTER
BICC1_768	sp|Q99MQ1|BICC1_MOUSE	Q99MQ1	768	0.997	VRTPTNTWSGLGFSKSMPAETIKELRRANHV	S	M	P	A	4	2	2	-0.370344	-0.081561	-0.615876	NA	-0.304743	STYX	-0.225953	0.26723	-0.460309	0.173551	CENTER
BICD2_578	sp|Q921C5|BICD2_MOUSE	Q921C5	578	1	QGKAGRTSPEGRGRRSPVLLPKGLLATEVGR	S	P	V	L	5	2	3	-0.125416	0.171119	-0.640806	-0.889308	-0.634727	STYX	0.0228514	0.90187	-0.721614	0.0248529	CENTER
BICD2_819	sp|Q921C5|BICD2_MOUSE	Q921C5	819	0.996	RGRSKAASKAKPASPSL______________	S	L	_	_	4	2	2	-0.30572	0.223169	-0.830959	NA	-1.03544	STYX	-0.0412755	0.844958	-0.933202	0.0376575	NR
BICRA_1427	sp|F8VPZ9|BICRA_MOUSE	F8VPZ9	1427	0.993	PGAAEGAQGRPRGAGSPTPLPTKVDEATSGL	S	P	T	P	5	2	3	-0.244937	0.0240217	-0.880038	-0.882834	-1.2019	STYX	-0.110458	0.569816	-0.988258	0.00946657	NR
BIEA_229	sp|Q9CY64|BIEA_MOUSE	Q9CY64	229	1	WIEEKGPGLKRNRHISIHFKSGSLEEVPNVG	S	I	H	F	5	2	3	-0.550238	0.240126	-0.722236	-0.789304	-0.759522	STYX	-0.155056	0.653823	-0.75702	0.0202983	CENTER
BIEA_236	sp|Q9CY64|BIEA_MOUSE	Q9CY64	236	0.994	GLKRNRHISIHFKSGSLEEVPNVGVNKNIFL	S	L	E	E	5	2	3	-0.20377	0.0432871	-1.02111	-1.02271	-1.32842	STYX	-0.0802413	0.680429	-1.12408	0.00646963	NR
BIG1_1076	sp|G3X9K3|BIG1_MOUSE	G3X9K3	1076	0.997	VKPRYISGTVRGREGSLTGTKDQAPDEFVGL	S	L	T	G	5	2	3	0.354731	-0.0912492	-1.50817	-2.40798	-1.23221	STYX	0.131741	0.591944	-1.71612	0.0036473	NR
BIG1_394	sp|G3X9K3|BIG1_MOUSE	G3X9K3	394	0.993	VAYTPSLPDDRLSVSSNDTQESGNSSGPSPG	S	N	D	T	4	2	2	0.106663	-0.0308351	0.0546183	0.202776	NA	STYX	0.0379139	0.791617	0.128697	0.805175	CENTER
BIG1_661	sp|G3X9K3|BIG1_MOUSE	G3X9K3	661	0.96	EISEVKHPETINRYGSLNSLESTSSSGIGSY	S	L	N	S	5	2	3	-0.350987	0.0110738	-0.083974	-0.140567	-0.0240534	STYX	-0.169957	0.423022	-0.0828646	0.634598	CENTER
BIG2_1518	sp|A2A5R2|BIG2_MOUSE	A2A5R2	1518	0.997	EEVSDRHLDVDLDRQSLSSIDRNASERGQSQ	S	L	S	S	5	2	3	-0.000463175	-0.0170374	0.203798	-0.104325	0.072515	STYX	-0.00875028	0.995196	0.0573292	0.968907	CENTER
BIG2_1535	sp|A2A5R2|BIG2_MOUSE	A2A5R2	1535	0.998	SSIDRNASERGQSQLSNPTDDSWKGAPYAHQ	S	N	P	T	4	2	2	0.173752	0.125871	-0.027511	0.173872	NA	STYX	0.149811	0.38611	0.0731802	0.936474	CENTER
BIG2_227	sp|A2A5R2|BIG2_MOUSE	A2A5R2	227	0.999	MQSKPQSPVIQATAGSPKFSRLKQSQAQSKP	S	P	K	F	5	2	3	0.139817	-0.29918	-0.028296	0.000201978	-0.342225	STYX	-0.0796815	0.72256	-0.12344	0.542901	CENTER
BIG2_355 356	sp|A2A5R2|BIG2_MOUSE	A2A5R2	355 356	0.876	ENSQTNGIADDRQSLSSADNLEPDVQGHQVA NSQTNGIADDRQSLSSADNLEPDVQGHQVAA	S	S	A	D	5	2	3	0.331311	0.00922918	0.0647914	0.0268785	0.162616	STYX	0.17027	0.418541	0.0847621	0.885175	CENTER
BIN1_298	sp|O08539|BIN1_MOUSE	O08539	298	0.996	AQPSDNAPEKGNKSPSPPPDGSPAATPEIRV	S	P	P	P	5	2	3	0.251069	0.0926818	-0.217732	-0.586522	-0.607203	STYX	0.171875	0.354325	-0.470486	0.0929193	CENTER
BIN1_304	sp|O08539|BIN1_MOUSE	O08539	304	0.998	APEKGNKSPSPPPDGSPAATPEIRVNHEPEP	S	P	A	A	5	2	3	0.283216	0.0212009	-0.318427	-0.588324	-0.511424	STYX	0.152208	0.437629	-0.472725	0.0848391	CENTER
BIN2_380	sp|D3Z6Q9|BIN2_MOUSE	D3Z6Q9	380	0.997	SAQSPGRGQTGKDTPSPGDVVLRARASSEGA	S	P	G	D	5	2	3	-0.148432	0.0860914	0.735573	-0.137509	0.897934	STYX	-0.0311702	0.879365	0.498666	0.231551	CENTER
BIN2_430	sp|D3Z6Q9|BIN2_MOUSE	D3Z6Q9	430	0.999	PPPRASGSGSCNAPGSPEGSSQLCSPRASPD	S	P	E	G	5	2	3	-0.0333101	-0.0171278	0.249196	0.879934	-0.940747	STYX	-0.0252189	0.921684	0.0627943	0.890873	CENTER
BIN2_439	sp|D3Z6Q9|BIN2_MOUSE	D3Z6Q9	439	0.998	SCNAPGSPEGSSQLCSPRASPDASSNPEPAE	S	P	R	A	5	2	3	-0.528839	-0.0641769	-0.0611247	0.426886	-0.521871	STYX	-0.296508	0.22418	-0.0520364	0.738305	CENTER
BIN2_443	sp|D3Z6Q9|BIN2_MOUSE	D3Z6Q9	443	0.998	PGSPEGSSQLCSPRASPDASSNPEPAETREK	S	P	D	A	5	2	3	0.0303483	0.126663	0.640893	0.548271	0.407867	STYX	0.0785057	0.620086	0.532344	0.125341	CENTER
BL1S4_164	sp|Q8VED2|BL1S4_MOUSE	Q8VED2	164	1	ARMEEQVAKAEAELGTFPRAFRRLLHTISVP	T	F	P	R	5	2	3	-0.373942	0.0711022	-0.165587	-0.189377	-0.0205699	STYX	-0.15142	0.508932	-0.125178	0.528306	CENTER
BLM_774	sp|O88700|BLM_MOUSE,sp|Q9Z129|RECQ1_MOUSE	O88700	774	0.997	LQLSKKDPIIKLLYVTPEKVCASNRLISTLE	T	P	E	K	5	2	3	-0.355824	0.265641	0.590171	1.03374	0.334932	STYX	-0.0450914	0.839147	0.652948	0.086295	CENTER
BLNK_196	sp|Q9QUN3|BLNK_MOUSE	Q9QUN3	196	0.987	PVEDNDENYIHPRESSPPPAEKAPMVNRSTK	S	P	P	P	5	2	3	0.347588	-0.313279	0.45425	0.56308	0.842224	STYX	0.0171545	0.98882	0.619851	0.0861149	CENTER
BMP2K_1010	sp|Q91Z96|BMP2K_MOUSE	Q91Z96	1010	0.991	TPERARRHKKVGRRDSQSSNEFLTISDSKEN	S	Q	S	S	5	2	3	-0.248023	0.0966915	-0.167184	-0.747331	-0.310212	STYQ	-0.0756658	0.711459	-0.408243	0.144681	CENTER
BMP2K_13	sp|Q91Z96|BMP2K_MOUSE	Q91Z96	13	0.995	___MKKFSRMPKSEGSGGGAAAGGAAGGGLG	S	G	G	G	5	2	3	0.443178	-0.180357	0.28385	-0.80679	0.227676	STYX	0.13141	0.705096	-0.0984216	0.768429	CENTER
BMP2K_644	sp|Q91Z96|BMP2K_MOUSE	Q91Z96	644	0.988	DREFDLLRSNRLGASTPSDKTVDLPPAPHSR	T	P	S	D	5	2	3	-0.387575	0.136503	-1.08856	-0.488847	-0.891951	STYX	-0.125536	0.613431	-0.82312	0.0193958	CENTER
BMP2K_908	sp|Q91Z96|BMP2K_MOUSE	Q91Z96	908	0.999	PAVGPDARPLPARPRSVDIFGSTPFQPFSVS	S	V	D	I	5	2	3	-0.024347	-0.2002	-0.236961	-1.11537	-0.788722	STYX	-0.112273	0.547265	-0.713686	0.0405701	CENTER
BMP2K_929	sp|Q91Z96|BMP2K_MOUSE	Q91Z96	929	0.995	STPFQPFSVSASKSESKEDVFGLVPFEEITG	S	K	E	D	5	2	3	0.399356	-0.21217	-0.665558	-1.15942	-0.213954	STYX	0.0935929	0.796564	-0.679646	0.0494803	CENTER
BNIP2_114	sp|O54940|BNIP2_MOUSE	O54940	114	0.997	DDLPKPKTTEVIRKGSITEYTATEEKGDGRR	S	I	T	E	5	2	3	-0.193061	-0.0220463	-0.853801	-1.06204	-0.904383	STYX	-0.107553	0.564707	-0.940076	0.0105154	NR
BNIP3_66	sp|O55003|BNIP3_MOUSE	O55003	66	0.993	SSSKSSHCDSPPRSQTPQDTNRAEIDSHSFG	T	P	Q	D	5	2	3	1.15854	-0.819456	-0.0712875	0.312011	-0.0191486	STYX	0.169541	0.982445	0.0738584	0.928398	CENTER
BOLA1_123	sp|Q9D8S9|BOLA1_MOUSE	Q9D8S9	123	0.999	AKTPAQWRENPQLDISPPCLGGSKKTRGTS_	S	P	P	C	4	2	2	-0.239539	0.0153531	NA	-0.209684	-0.346691	STYX	-0.112093	0.561137	-0.278188	0.339526	CENTER
BOLA1_81	sp|Q9D8S9|BOLA1_MOUSE	Q9D8S9	81	1	THFRVAVVSSRFEGMSPLQRHRLVHEALSEE	S	P	L	Q	5	2	3	-0.268247	0.0107933	-0.0187527	0.306479	0.152931	STYX	-0.128727	0.510739	0.146886	0.719389	CENTER
BORC5_75	sp|Q9D920|BORC5_MOUSE	Q9D920	75	0.99	PTFQPLLKGLLSGQTSPTNAKLEKLDSQQVL	S	P	T	N	5	2	3	0.00792459	0.0108935	0.138325	-0.220873	-0.275191	STYX	0.00940906	0.919361	-0.119246	0.546385	CENTER
BORC6_173	sp|Q9D6W8|BORC6_MOUSE	Q9D6W8	173	0.999	GRAGRSFPSRLQDSRSLDGLSGACGGGGSSS	S	L	D	G	4	2	2	-0.0845373	-0.290503	0.0138517	-0.0419465	NA	STYX	-0.18752	0.323582	-0.0140474	0.855953	CENTER
BORC6_43	sp|Q9D6W8|BORC6_MOUSE	Q9D6W8	43	0.997	RPSRTPSKPPSVRTLSGEEEAESVGVSSRHP	S	G	E	E	5	2	3	-0.0402481	-0.00235695	-0.773194	-0.803527	-0.415219	STYX	-0.0213025	0.937964	-0.66398	0.0348706	CENTER
BORG4_116	sp|Q9JM96|BORG4_MOUSE	Q9JM96	116	1	LGSLRDSALFVKNAMSLPQLNEKEAAEKDSS	S	L	P	Q	5	2	3	0.230924	0.570304	-0.285658	-0.863973	-0.42696	STYX	0.400614	0.113173	-0.52553	0.0776453	CENTER
BORG5_121	sp|Q91W92|BORG5_MOUSE	Q91W92	121	0.999	SPAPPPISPIIKNAISLPQLNQATYDSLVMG	S	L	P	Q	5	2	3	-0.521637	-0.389063	-0.32076	-0.637522	-0.26802	STYX	-0.45535	0.0503246	-0.408767	0.127407	CENTER
BORG5_207	sp|Q91W92|BORG5_MOUSE	Q91W92	207	0.993	FPSEPTPNPELRRSDSLLSFRFDLDLGPSLL	S	L	L	S	5	2	3	-0.707725	-0.276048	-0.755045	-0.742507	0.185991	STYX	-0.491887	0.061457	-0.437187	0.170668	CENTER
BPL1_124	sp|Q920N2|BPL1_MOUSE	Q920N2	124	0.994	CLELENSTIDSVRSASAENIPDLPCDHSGVE	S	A	E	N	5	2	3	-0.032001	-0.0944167	-0.249986	-0.13725	-0.295312	STYX	-0.0632089	0.741189	-0.227516	0.318677	CENTER
BPNT1_42	sp|Q9Z0S1|BPNT1_MOUSE	Q9Z0S1	42	0.987	RCVIAEGDLGIVQKTSATDLQTKADRLVQMS	S	A	T	D	5	2	3	0.160681	-0.0793119	0.771172	0.756073	0.903748	STYX	0.0406844	0.809796	0.810331	0.0335152	CENTER
BRAF_135	sp|P28028|BRAF_MOUSE	P28028	135	1	LVFQTPTDASRNNPKSPQKPIVRVFLPNKQR	S	P	Q	K	5	2	3	0.94771	1.08633	0.26377	0.188307	-0.0175368	STYX	1.01702	0.0235875	0.144847	0.721695	NR
BRAF_346 347 348	sp|P28028|BRAF_MOUSE	P28028	346 347 348	0.885	PADEDHRNQFGQRDRSSSAPNVHINTIEPVN ADEDHRNQFGQRDRSSSAPNVHINTIEPVNI DEDHRNQFGQRDRSSSAPNVHINTIEPVNID	S	S	S	A	5	2	3	-0.0965915	-0.155786	-0.15181	0.0313978	0.123578	STYX	-0.126189	0.47525	0.00105551	0.868634	CENTER
BRAF_348	sp|P28028|BRAF_MOUSE	P28028	348	0.969	DEDHRNQFGQRDRSSSAPNVHINTIEPVNID	S	A	P	N	5	2	3	-0.127035	0.0610787	0.25808	0.122055	0.370386	STYX	-0.0329784	0.872002	0.250174	0.472882	CENTER
BRAF_766	sp|P28028|BRAF_MOUSE	P28028	766	0.997	IELLARSLPKIHRSASEPSLNRAGFQTEDFS	S	E	P	S	5	2	3	0.0511957	0.177291	0.394675	0.447742	0.388083	STYX	0.114243	0.503675	0.410167	0.222001	CENTER
BRAP_116	sp|Q99MP8|BRAP_MOUSE	Q99MP8	116	0.998	QRSREQSESVNTAPESPSKQLPDQISFFSGN	S	P	S	K	4	2	2	0.32822	-0.0920327	-0.0150084	0.259558	NA	STYX	0.118094	0.617626	0.122275	0.822437	CENTER
BRAT1_684 685	sp|Q8C3R1|BRAT1_MOUSE	Q8C3R1	684 685	0.894	QPSLHCPYTVGLPRASSPRPHPEFLQTLCRL PSLHCPYTVGLPRASSPRPHPEFLQTLCRLP	S	S	P	R	5	2	3	-0.545358	-0.0429126	-0.546584	-0.597017	-0.696215	STYX	-0.294135	0.245088	-0.613272	0.0392833	CENTER
BRAT1_685	sp|Q8C3R1|BRAT1_MOUSE	Q8C3R1	685	0.974	PSLHCPYTVGLPRASSPRPHPEFLQTLCRLP	S	P	R	P	5	2	3	-0.274922	0.0632137	-0.41502	-0.882692	-0.70064	STYX	-0.105854	0.604057	-0.666117	0.035137	CENTER
BRAT1_735 736	sp|Q8C3R1|BRAT1_MOUSE	Q8C3R1	735 736	0.899	ACDLLLFLRDKTVPCSSPREAGDSPNSASVE CDLLLFLRDKTVPCSSPREAGDSPNSASVEA	S	S	P	R	5	2	3	-0.20625	-0.226133	-0.559232	-0.848547	-0.939394	STYX	-0.216191	0.234602	-0.782391	0.020143	CENTER
BRAT1_736	sp|Q8C3R1|BRAT1_MOUSE	Q8C3R1	736	0.988	CDLLLFLRDKTVPCSSPREAGDSPNSASVEA	S	P	R	E	5	2	3	0.00431317	-0.0401094	-0.892319	-0.712991	-0.468886	STYX	-0.0178981	0.953733	-0.691399	0.0302274	CENTER
BRAT1_743	sp|Q8C3R1|BRAT1_MOUSE	Q8C3R1	743	0.998	RDKTVPCSSPREAGDSPNSASVEAALQRWRE	S	P	N	S	5	2	3	-0.287313	0.0351072	-0.419667	-0.411555	-0.728729	STYX	-0.126103	0.536826	-0.519984	0.0681842	CENTER
BRCA1_1199	sp|P48754|BRCA1_MOUSE	P48754	1199	0.998	EDLPCFQHLLSRISNTPELTRCSSAVTQRMP	T	P	E	L	4	2	2	-0.217459	-0.100957	-0.193081	NA	-0.355297	STYX	-0.159208	0.379605	-0.274189	0.347833	CENTER
BRCA1_686	sp|P48754|BRCA1_MOUSE	P48754	686	1	AKKNEPNEHIRKRRASDAFPEEKLMNKAGLL	S	D	A	F	5	2	3	0.224408	0.139798	-0.168208	-0.48394	-0.637822	STYX	0.182103	0.315973	-0.42999	0.118649	CENTER
BRCA1_717	sp|P48754|BRCA1_MOUSE	P48754	717	0.999	TSCSSPRKSQGPVNPSPQRTGTEQLETRQMS	S	P	Q	R	5	2	3	0.0764654	-0.114652	-0.00497188	0.0187265	-0.10417	STYX	-0.0190931	0.938323	-0.0301384	0.780027	CENTER
BRCA2_1758	sp|P97929|BRCA2_MOUSE	P97929	1758	0.997	SDVPPDMKNAEGNTISPRVSATKERNLHPQT	S	P	R	V	5	2	3	0.554356	0.417304	0.561149	0.309406	0.204972	STYX	0.48583	0.0667615	0.358509	0.298707	CENTER
BRD3_247 248 249	sp|Q8K2F0|BRD3_MOUSE	Q8K2F0	247 248 249	0.896	TPPVVKKKGVKRKADTTTPTTSAITASRSES PPVVKKKGVKRKADTTTPTTSAITASRSESP PVVKKKGVKRKADTTTPTTSAITASRSESPP	T	T	T	P	5	2	3	-0.57541	0.000375057	0.807279	0.630164	0.0783069	STYX	-0.287517	0.291893	0.50525	0.178896	CENTER
BRD3_249	sp|Q8K2F0|BRD3_MOUSE	Q8K2F0	249	0.996	PVVKKKGVKRKADTTTPTTSAITASRSESPP	T	P	T	T	4	2	2	-0.210914	0.155289	0.615285	NA	0.00376305	STYX	-0.0278121	0.892876	0.309524	0.515935	CENTER
BRD3_262	sp|Q8K2F0|BRD3_MOUSE	Q8K2F0	262	0.997	TTTPTTSAITASRSESPPPLSEPKQAKVVAR	S	P	P	P	5	2	3	0.0826044	-0.0670026	0.0788888	-0.05486	-0.21027	STYX	0.00780087	0.930984	-0.0620806	0.689644	CENTER
BRD4_1153	sp|Q9ESU6|BRD4_MOUSE	Q9ESU6	1153	1	VQPQPLVVVKEEKIHSPIIRSEPFSTSLRPE	S	P	I	I	5	2	3	-0.143153	0.565013	0.567007	-0.291421	-0.203561	STYX	0.21093	0.568365	0.0240086	0.862549	CENTER
BRD7_279	sp|O88665|BRD7_MOUSE	O88665	279	0.997	QSGEDSGCWQREREDSGDAETQAFRSPAKDN	S	G	D	A	5	2	3	0.757956	0.0486898	0.327294	0.262847	0.00867094	STYX	0.403323	0.215926	0.199604	0.587133	CENTER
BRD7_621	sp|O88665|BRD7_MOUSE	O88665	621	0.998	VSIHGVRKAMGISVPSPIVGNSFVDLTGECE	S	P	I	V	4	2	2	-0.0523042	-0.231371	NA	0.178503	0.598936	STYX	-0.141838	0.446047	0.388719	0.371327	CENTER
BRD8_264	sp|Q8R3B7|BRD8_MOUSE	Q8R3B7	264	0.999	ITDDSPQKKMLGQKATPPPSPLLSELLKKGS	T	P	P	P	5	2	3	-0.130129	0.275976	0.855117	0.426958	0.826125	STYX	0.0729231	0.756289	0.702733	0.0602451	CENTER
BRD8_283 284	sp|Q8R3B7|BRD8_MOUSE	Q8R3B7	283 284	0.898	SPLLSELLKKGSLLPTSPRLVNESEMPVPPG PLLSELLKKGSLLPTSPRLVNESEMPVPPGH	T	S	P	R	5	2	3	0.366151	0.750185	0.196513	0.489184	0.0851695	STYX	0.558168	0.0612698	0.256955	0.477056	CENTER
BRD8_645	sp|Q8R3B7|BRD8_MOUSE	Q8R3B7	645	1	GEADGSSGKGDERPLSAVKTEASPESMLSPS	S	A	V	K	5	2	3	0.241524	0.0154703	0.461778	0.972947	0.673276	STYX	0.128497	0.491688	0.702667	0.0610644	CENTER
BRD9_103	sp|Q3UQU0|BRD9_MOUSE	Q3UQU0	103	1	RKEEKKRKREKEHCDSEGEADAFDPGKKVEV	S	E	G	E	5	2	3	0.622957	-0.0393286	0.184423	0.0448344	-0.0864709	STYX	0.291814	0.356023	0.0475954	0.995736	CENTER
BRDT_186	sp|Q91Y44|BRDT_MOUSE	Q91Y44	186	0.998	FKRQEIPSGLPDISLSPLNMAQEAPPICDSQ	S	P	L	N	5	2	3	0.0220515	0.194415	0.952019	0.369266	-0.000724273	STYX	0.108234	0.537271	0.440187	0.272997	CENTER
BRDT_230	sp|Q91Y44|BRDT_MOUSE	Q91Y44	230	0.998	DTTTPTTSIAKASSESPPTLRETKPVNMPVK	S	P	P	T	5	2	3	0.637985	0.457994	0.388139	0.23174	0.351185	STYX	0.547989	0.0548939	0.323688	0.337185	CENTER
BRE1A_138	sp|Q5DTM8|BRE1A_MOUSE	Q5DTM8	138	0.993	ERKALVVPEPEPDSDSNQERKDDRERGDGQE	S	N	Q	E	5	2	3	-0.274017	-0.223108	-0.312714	-0.298131	-0.577896	STYX	-0.248562	0.18165	-0.396247	0.131232	CENTER
BRM1L_197	sp|Q3U1T3|BRM1L_MOUSE	Q3U1T3	197	1	WNDELQSRKKRKDPFSPDKKKPVVVSGPYIV	S	P	D	K	5	2	3	0.286006	-0.334784	-0.589896	-0.744214	0.0216675	STYX	-0.0243889	0.893499	-0.437481	0.141619	CENTER
BRPF1_82	sp|B2RRD7|BRPF1_MOUSE	B2RRD7	82	0.967	QSRPANKQSPSPSEVSQSPGREVMSYAQAQR	S	Q	S	P	4	2	2	0.112525	0.143637	-0.372257	-0.272899	NA	STYQ	0.128081	0.443967	-0.322578	0.283312	CENTER
BRSK1_450	sp|Q5RJI5|BRSK1_MOUSE	Q5RJI5	450	0.998	GASTGLSSSPLSSPRSPVFSFSPEPGAGDEA	S	P	V	F	4	2	2	0.0841253	-0.0971442	-0.195512	NA	0.209462	STYX	-0.00650942	0.996992	0.00697465	0.902754	CENTER
BRSK1_508	sp|Q5RJI5|BRSK1_MOUSE	Q5RJI5	508	0.999	PPPSARSTPLPGPPGSPRSSGGTPLHSPLHT	S	P	R	S	5	2	3	-0.0630077	0.122793	0.223147	0.147592	0.0795498	STYX	0.0298928	0.834224	0.150096	0.703316	CENTER
BRSK1_563	sp|Q5RJI5|BRSK1_MOUSE,sp|Q69Z98|BRSK2_MOUSE	Q5RJI5	563	0.998	AWRSRLNSIRNSFLGSPRFHRRKMQVPTAEE	S	P	R	F	5	2	3	-0.230681	0.204406	0.0457686	-0.0919451	0.342429	STYX	-0.0131373	0.93501	0.098751	0.862188	CENTER
BRSK1_758	sp|Q5RJI5|BRSK1_MOUSE	Q5RJI5	758	0.975	SLQPPPGRSDPDLSSSPRRGPPKDKKLLATN	S	P	R	R	5	2	3	0.352878	0.39491	0.597869	-0.377335	0.473646	STYX	0.373894	0.104679	0.231393	0.591157	CENTER
BRSK2_368	sp|Q69Z98|BRSK2_MOUSE	Q69Z98	368	1	LPPRNEIDPPRKRVDSPMLNRHGKRRPERKS	S	P	M	L	4	2	2	-0.485631	-0.165248	NA	-0.201375	0.250252	STYX	-0.32544	0.137532	0.0244384	0.941968	CENTER
BRSK2_424	sp|Q69Z98|BRSK2_MOUSE	Q69Z98	424	0.996	QRSRSISGASSGLSTSPLSSPRVTPHPSPRG	S	P	L	S	5	2	3	-0.775258	0.0677631	-0.195903	0.153941	-0.213274	STYX	-0.353747	0.345334	-0.0850786	0.627838	CENTER
BRSK2_436	sp|Q69Z98|BRSK2_MOUSE	Q69Z98	436	0.997	LSTSPLSSPRVTPHPSPRGSPLPTPKGTPVH	S	P	R	G	5	2	3	0.206352	0.10668	-0.149652	-0.251514	0.312675	STYX	0.156516	0.377837	-0.0294968	0.771487	CENTER
BRWD1_1751	sp|Q921C3|BRWD1_MOUSE	Q921C3	1751	0.99	SHTAATCKTKSRPIESSEEDSRCHGSDHGPS	S	S	E	E	5	2	3	0.061756	0.453659	0.136109	0.207478	-0.458441	STYX	0.257707	0.272014	-0.0382846	0.790865	CENTER
BRWD1_1830	sp|Q921C3|BRWD1_MOUSE	Q921C3	1830	0.998	CEEKCGERRGPEVEGSPVSEALREAILAPQC	S	P	V	S	5	2	3	0.045347	0.509704	-0.137478	-0.341275	-0.46916	STYX	0.277525	0.27118	-0.315971	0.205323	CENTER
BRWD1_1857	sp|Q921C3|BRWD1_MOUSE	Q921C3	1857	0.999	APQCLSHRGSETDVDSDGGAVREKSYSNENG	S	D	G	G	5	2	3	0.801154	0.220238	0.0103292	0.00479532	-0.198655	STYX	0.510696	0.0961123	-0.061177	0.693174	CENTER
BRWD1_1902	sp|Q921C3|BRWD1_MOUSE	Q921C3	1902	0.997	KSSSDKESNLQVTQKSPKDRSSPSRITQRAS	S	P	K	D	4	2	2	0.739862	0.404312	-0.0813484	NA	-0.627466	STYX	0.572087	0.0559549	-0.354407	0.296486	CENTER
BRWD1_1927	sp|Q921C3|BRWD1_MOUSE	Q921C3	1927	0.993	ITQRASVATDKMKLTSDAEDLSLESVCTRSK	S	D	A	E	5	2	3	-0.412969	-0.0386822	-0.188628	-0.530352	-0.447815	STYX	-0.225826	0.30132	-0.388931	0.139184	CENTER
BRWD1_702	sp|Q921C3|BRWD1_MOUSE	Q921C3	702	0.999	TPRRGSFRRLSLDIQSPPNIGLRRSGQVEGV	S	P	P	N	5	2	3	0.00181128	0.0175501	-0.0224584	-0.145255	0.0287783	STYX	0.00968067	0.917217	-0.0463116	0.733265	CENTER
BSN_105	sp|O88737|BSN_MOUSE	O88737	105	0.999	SPTPKQASATAPGRESPRETRAQGPSGQEAE	S	P	R	E	5	2	3	0.193909	0.041613	0.659969	0.68568	0.903027	STYX	0.117761	0.499234	0.749559	0.0448144	CENTER
BSPRY_460	sp|Q80YW5|BSPRY_MOUSE	Q80YW5	460	1	LISIVRGPLATVRLDSPPHHPCRSGHASR__	S	P	P	H	5	2	3	0.0800938	0.0337703	1.33735	1.03964	1.14633	STYX	0.056932	0.702172	1.17444	0.00960104	NR
BTBD7_722	sp|Q8CFE5|BTBD7_MOUSE	Q8CFE5	722	0.999	QNPHKFFPDERFGDESPLLTMRQPGRCRVNS	S	P	L	L	5	2	3	-0.628754	-0.226536	0.485044	0.0155684	0.479443	STYX	-0.427645	0.0836584	0.326685	0.361488	CENTER
BTBD7_994	sp|Q8CFE5|BTBD7_MOUSE	Q8CFE5	994	0.992	ASPNGLKSVYLPGQTSPKKQEDPRREYPPSP	S	P	K	K	4	2	2	-0.230532	0.100919	NA	-0.200134	-0.0195367	STYX	-0.0648063	0.750647	-0.109835	0.638138	CENTER
BTBDA_119	sp|Q80X66|BTBDA_MOUSE	Q80X66	119	0.998	DHSSSRPSSPRPQRASPNGSMSSAGNSSRNS	S	P	N	G	4	2	2	0.34393	-0.0345693	0.405224	0.631043	NA	STYX	0.15468	0.483501	0.518133	0.222546	CENTER
BTBDI_174	sp|A0A0A6YY25|BTBDI_MOUSE	A0A0A6YY25	174	0.996	PKSRPQTPLPVTQTPSPLGAVRLKSLGEEEG	S	P	L	G	4	2	2	-0.173962	-0.126983	-0.242862	NA	0.147356	STYX	-0.150473	0.393805	-0.047753	0.780046	CENTER
BTBDI_414	sp|A0A0A6YY25|BTBDI_MOUSE	A0A0A6YY25	414	0.994	VNEQEIPARIQLCQDSPESPRLQDILLSASH	S	P	E	S	5	2	3	-0.191321	0.0822639	0.0213386	0.380406	0.138989	STYX	-0.0545285	0.78789	0.180245	0.642046	CENTER
BTBDI_443	sp|A0A0A6YY25|BTBDI_MOUSE	A0A0A6YY25	443	0.994	SHSPDHPMVKSEFGSSPMLTGKESDLNIDCR	S	P	M	L	5	2	3	-0.023074	0.609939	0.556782	0.421693	0.563905	STYX	0.293433	0.334457	0.514127	0.136418	CENTER
BTBDI_583	sp|A0A0A6YY25|BTBDI_MOUSE	A0A0A6YY25	583	0.999	PLVMRSENTESFEPLSPLVMPSEVSREELSL	S	P	L	V	5	2	3	0.0514943	-0.0687261	-0.00251753	-0.143797	0.134997	STYX	-0.00861589	0.992861	-0.00377264	0.855237	CENTER
BTF3_156	sp|Q64152|BTF3_MOUSE	Q64152	156	0.997	LTEMLPSILNQLGADSLTSLRRLAEALPKQS	S	L	T	S	4	2	2	-0.809322	0.157225	NA	-0.140088	0.466382	STYX	-0.326048	0.470946	0.163147	0.778013	CENTER
BUB1_579	sp|O08901|BUB1_MOUSE	O08901	579	0.999	DSTVCGIRCNKTLAPSPKSIGDFTSAAQLSS	S	P	K	S	5	2	3	0.26175	0.0929453	0.453225	0.810972	0.511897	STYX	0.177348	0.343955	0.592031	0.0970331	CENTER
BUB1B_1050	sp|Q9Z1S0|BUB1B_MOUSE	Q9Z1S0	1050	0.999	EALLTQQDKQPGGSQSPA_____________	S	P	A	_	5	2	3	-0.032217	0.639417	0.321092	0.579594	0.335233	STYX	0.3036	0.340352	0.411973	0.226299	CENTER
BUD13_121	sp|Q8R149|BUD13_MOUSE	Q8R149	121	0.991	GGHGEDGHFHHDDQDSSPPRRVRHDTPDTSP	S	S	P	P	4	2	2	-0.473067	0.271768	-0.0536616	0.271687	NA	STYX	-0.10065	0.740934	0.109013	0.858033	CENTER
BUD13_131 134 135	sp|Q8R149|BUD13_MOUSE	Q8R149	131 134 135	0.89	HDDQDSSPPRRVRHDTPDTSPPRKARHDTPD QDSSPPRRVRHDTPDTSPPRKARHDTPDPSP DSSPPRRVRHDTPDTSPPRKARHDTPDPSPP	T	P	D	T	5	2	3	0.569237	0.025137	-0.0192053	0.187514	-0.24291	STYX	0.297187	0.279501	-0.0248672	0.794454	CENTER
BUD13_134 135	sp|Q8R149|BUD13_MOUSE,sp|Q8R149|BUD13_MOUSE	Q8R149	134 135	0.896	QDSSPPRRVRHDTPDTSPPRKARHDTPDPSP DSSPPRRVRHDTPDTSPPRKARHDTPDPSPP	T	S	P	P	5	2	3	0.274332	0.585135	0.488456	0.359421	-0.250905	STYX	0.429734	0.0946814	0.198991	0.634598	CENTER
BUD13_148	sp|Q8R149|BUD13_MOUSE,sp|Q8R149|BUD13_MOUSE,sp|Q8R149|BUD13_MOUSE,sp|Q8R149|BUD13_MOUSE	Q8R149	148	0.999	DTSPPRKARHDTPDPSPPRKARHDTPDTSPP	S	P	P	R	5	2	3	0.182517	0.346429	0.387379	0.277586	-0.0345494	STYX	0.264473	0.198974	0.210139	0.575763	CENTER
BUD13_187	sp|Q8R149|BUD13_MOUSE,sp|Q8R149|BUD13_MOUSE	Q8R149	187	0.998	DPSPPRKARHDTPDPSPPRRVRHDTPDLSPP	S	P	P	R	4	2	2	0.752139	0.595362	NA	0.245963	0.237179	STYX	0.673751	0.0388362	0.241571	0.563486	CENTER
BUD13_200	sp|Q8R149|BUD13_MOUSE,sp|Q8R149|BUD13_MOUSE	Q8R149	200	0.999	DPSPPRRVRHDTPDLSPPRRVRHDTPDLSPP	S	P	P	R	5	2	3	0.122638	0.226114	0.495159	0.217954	-0.163354	STYX	0.174376	0.335642	0.183253	0.662606	CENTER
BUD13_238	sp|Q8R149|BUD13_MOUSE	Q8R149	238	1	PDPSPPRRVRHDLDASPPRKSHRNSSAVSPR	S	P	P	R	5	2	3	0.324465	0.298957	0.0130444	0.166912	0.0427798	STYX	0.311711	0.143225	0.0742453	0.915278	CENTER
BUD13_251	sp|Q8R149|BUD13_MOUSE	Q8R149	251	0.998	DASPPRKSHRNSSAVSPRRGHHGSLGTSSPR	S	P	R	R	5	2	3	1.27571	-0.00347931	0.755019	0.590378	-0.0286476	STYX	0.636116	0.239063	0.438916	0.25214	CENTER
BUD13_297	sp|Q8R149|BUD13_MOUSE	Q8R149	297	1	LDSSGTQHLRRAHHESPDLELHKAKSSKAAE	S	P	D	L	5	2	3	0.217706	0.229899	-0.222762	0.849181	-0.207274	STYX	0.223803	0.240367	0.139715	0.928242	CENTER
BYST_97	sp|O54825|BYST_MOUSE	O54825	97	0.999	RERATRLGPGLPQDGSDEEDEEWPTLEKAAK	S	D	E	E	5	2	3	-0.67441	-0.0113548	-0.422072	-0.46398	-0.388436	STYX	-0.342882	0.253925	-0.424829	0.105189	CENTER
BZW1_411	sp|Q9CQC6|BZW1_MOUSE	Q9CQC6	411	0.978	QMKKFVEWLKNAEEESESEAEEGD_______	S	E	S	E	5	2	3	-0.0127112	0.0102898	0.307168	0.0507629	0.50578	STYX	-0.00121073	0.968712	0.287904	0.418929	CENTER
C170B_1101	sp|Q80U49|C170B_MOUSE	Q80U49	1101	0.989	SATAQKVQQALTRSNSLSTPRPTRASRLRRA	S	L	S	T	5	2	3	-0.230774	-0.0615108	-0.305916	0.190573	0.0928974	STYX	-0.146143	0.430026	-0.0074821	0.851071	CENTER
C170B_1122	sp|Q80U49|C170B_MOUSE	Q80U49	1122	0.988	PTRASRLRRARLGDASDTEAVDGERGTAANP	S	D	T	E	5	2	3	-0.14941	-0.331513	-0.782123	-1.10062	-0.37808	STYX	-0.240462	0.210669	-0.753607	0.0285351	CENTER
C170B_1347	sp|Q80U49|C170B_MOUSE	Q80U49	1347	0.987	VAGDGDSLGSPGPTRSPSLGNVPNTPASTIS	S	P	S	L	5	2	3	0.226497	-0.147987	-0.34009	-0.592537	-0.252912	STYX	0.0392549	0.866155	-0.39518	0.134154	CENTER
C170B_360	sp|Q80U49|C170B_MOUSE	Q80U49	360	0.993	HTRTLKGHKHEDGTQSDSEDPLAKTASVSGA	S	D	S	E	5	2	3	-0.489024	0.0602869	-0.769017	-0.259599	-0.63094	STYX	-0.214369	0.413444	-0.553185	0.0638685	CENTER
C170B_490	sp|Q80U49|C170B_MOUSE	Q80U49	490	0.998	GNTSPVPRASTRSFGSVGRRSRLAQDFMAQC	S	V	G	R	5	2	3	-0.251751	0.340265	-1.38004	-1.4038	-1.52781	STYX	0.044257	0.927048	-1.43722	0.00380157	NR
C170B_534 539 540 541	sp|Q80U49|C170B_MOUSE	Q80U49	534 539 540 541	0.888	KTPPVLPAPLTPRGASPVTPSTTPPPPTDPQ LPAPLTPRGASPVTPSTTPPPPTDPQLTKAR PAPLTPRGASPVTPSTTPPPPTDPQLTKARK APLTPRGASPVTPSTTPPPPTDPQLTKARKQ	S	P	V	T	4	2	2	-0.0418053	-0.0609068	-0.286504	-0.855106	NA	STYX	-0.0513561	0.797346	-0.570805	0.135022	CENTER
C170B_539 540 541	sp|Q80U49|C170B_MOUSE	Q80U49	539 540 541	0.897	LPAPLTPRGASPVTPSTTPPPPTDPQLTKAR PAPLTPRGASPVTPSTTPPPPTDPQLTKARK APLTPRGASPVTPSTTPPPPTDPQLTKARKQ	S	T	T	P	5	2	3	-0.124961	-0.116679	-0.452822	-0.291746	-0.928412	STYX	-0.12082	0.49261	-0.55766	0.067907	CENTER
C170B_653	sp|Q80U49|C170B_MOUSE	Q80U49	653	0.998	GMAPQMEQQSLLVPGSPGGQKWVSRWASLAD	S	P	G	G	5	2	3	-0.0730323	-0.053468	-0.415395	-0.789629	-0.417123	STYX	-0.0632501	0.738555	-0.540716	0.0635591	CENTER
C170B_818 819	sp|Q80U49|C170B_MOUSE	Q80U49	818 819	0.892	FVGPGEVDGPGRVVQTSPSARDGLYVSSNGR VGPGEVDGPGRVVQTSPSARDGLYVSSNGRM	T	S	P	S	4	2	2	-0.141106	-0.103072	NA	-0.518947	0.116824	STYX	-0.122089	0.488927	-0.201061	0.513914	CENTER
C170B_843	sp|Q80U49|C170B_MOUSE	Q80U49	843	0.997	VSSNGRMVIQLRSGRSPEPDPAPPKETLTFA	S	P	E	P	5	2	3	0.0581375	-0.256879	-0.836661	-1.44818	-1.32862	STYX	-0.0993706	0.619848	-1.20449	0.00632097	NR
C170B_862	sp|Q80U49|C170B_MOUSE	Q80U49	862	0.992	DPAPPKETLTFARQESFTKEPTSGPPAPGKL	S	F	T	K	5	2	3	-0.0119055	-0.237656	-1.31883	-1.16239	-0.899798	STYX	-0.124781	0.51139	-1.12701	0.00662406	NR
C170B_864	sp|Q80U49|C170B_MOUSE	Q80U49	864	0.996	APPKETLTFARQESFTKEPTSGPPAPGKLPH	T	K	E	P	4	2	2	-0.0218642	-0.200188	-1.56739	-0.947991	NA	STYX	-0.111026	0.552522	-1.25769	0.0245758	NR
C170B_967 968	sp|Q80U49|C170B_MOUSE	Q80U49	967 968	0.893	ASTISLLSGKNGPSPTTPQTPGPQKESPLSP STISLLSGKNGPSPTTPQTPGPQKESPLSPP	T	T	P	Q	4	2	2	-0.512294	-0.43521	NA	-0.211153	-0.72634	STYX	-0.473752	0.0451529	-0.468747	0.188177	CENTER
C2C2L_662	sp|Q80X80|C2C2L_MOUSE	Q80X80	662	0.996	IFRRRPRQKEAGLSQSHDDLSNTTATPSVRK	S	H	D	D	5	2	3	-0.013256	-0.176302	-0.5731	-0.346304	-0.475498	STYX	-0.094779	0.609327	-0.464967	0.0870547	CENTER
C2C4C_153	sp|Q5HZI2|C2C4C_MOUSE	Q5HZI2	153	0.998	VPKAQTSYGFATLAESPHTRRKESLFHSEHG	S	P	H	T	5	2	3	-0.29176	0.0331578	-0.528215	-0.526728	-0.693357	STYX	-0.129301	0.52634	-0.582766	0.046389	CENTER
C2C4C_282	sp|Q5HZI2|C2C4C_MOUSE	Q5HZI2	282	0.998	PDTSPGVRRRLSRRATPEPGPESGQAPRGEH	T	P	E	P	5	2	3	-0.354198	-0.292663	-0.695704	-0.29221	-0.668188	STYX	-0.323431	0.105065	-0.552034	0.0612275	CENTER
C2CD5_260	sp|Q7TPS5|C2CD5_MOUSE	Q7TPS5	260	0.984	LDKLSSPAAFLPACSSPSRELKEIPFNEDPN	S	P	S	R	5	2	3	-0.430359	0.111727	0.451357	0.439403	0.423606	STYX	-0.159316	0.535565	0.438122	0.193926	CENTER
C2CD5_280 281	sp|Q7TPS5|C2CD5_MOUSE	Q7TPS5	280 281	0.896	LKEIPFNEDPNPNTHSSGPSTPLKNQTYSFS KEIPFNEDPNPNTHSSGPSTPLKNQTYSFSP	S	S	G	P	5	2	3	-0.03565	0.157064	0.122121	0.737775	0.276593	STYX	0.0607072	0.710789	0.37883	0.300877	CENTER
C2CD5_295	sp|Q7TPS5|C2CD5_MOUSE	Q7TPS5	295	0.998	SSGPSTPLKNQTYSFSPSKSYSRQSSSSDTD	S	P	S	K	5	2	3	0.46409	0.80864	0.506168	0.55924	0.43342	STYX	0.636365	0.0467707	0.499609	0.144717	CENTER
C2CD5_304 305 306 307	sp|Q7TPS5|C2CD5_MOUSE	Q7TPS5	304 305 306 307	0.892	NQTYSFSPSKSYSRQSSSSDTDLSLTPKTGM QTYSFSPSKSYSRQSSSSDTDLSLTPKTGMG TYSFSPSKSYSRQSSSSDTDLSLTPKTGMGS YSFSPSKSYSRQSSSSDTDLSLTPKTGMGSG	S	S	S	S	5	2	3	0.466496	-0.165336	-0.602009	0.80197	-1.01649	STYX	0.15058	0.663843	-0.272176	0.391229	CENTER
C2CD5_307	sp|Q7TPS5|C2CD5_MOUSE	Q7TPS5	307	0.992	YSFSPSKSYSRQSSSSDTDLSLTPKTGMGSG	S	D	T	D	5	2	3	-0.0817443	0.0324031	0.280401	0.790167	0.228523	STYX	-0.0246706	0.916324	0.43303	0.230504	CENTER
C2CD5_314	sp|Q7TPS5|C2CD5_MOUSE	Q7TPS5	314	0.999	SYSRQSSSSDTDLSLTPKTGMGSGSAGKEGG	T	P	K	T	5	2	3	0.114882	0.631752	0.182926	-0.239398	0.130144	STYX	0.373317	0.171244	0.0245573	0.937782	CENTER
C2CD5_643	sp|Q7TPS5|C2CD5_MOUSE	Q7TPS5	643	0.999	LYEITPPEVSEEMIGSPIPEPRQRSRLLRSQ	S	P	I	P	5	2	3	-0.39465	-0.124037	0.183428	-0.203855	0.425275	STYX	-0.259343	0.203018	0.13495	0.780832	CENTER
C2CD5_659	sp|Q7TPS5|C2CD5_MOUSE	Q7TPS5	659	0.997	PIPEPRQRSRLLRSQSESSDEVTELDLSHGK	S	E	S	S	5	2	3	0.375638	-0.0189431	0.217298	-0.242378	0.150952	STYX	0.178347	0.431804	0.0419574	0.986791	CENTER
C2D1A_312	sp|Q8K1A6|C2D1A_MOUSE	Q8K1A6	312	0.999	ELVDLSRLPPPPDQLSPEPPLPAAQPLTSAS	S	P	E	P	5	2	3	-0.19544	-0.133974	0.0848419	0.181512	0.158061	STYX	-0.164707	0.354325	0.141472	0.725627	CENTER
C2D1A_435	sp|Q8K1A6|C2D1A_MOUSE	Q8K1A6	435	0.999	GVLETAMRLANHDEGSDDEEEETPKKQNTPA	S	D	D	E	5	2	3	0.290882	0.0843971	-0.511341	-0.479225	-0.135011	STYX	0.18764	0.330974	-0.375192	0.153436	CENTER
C2D1A_459	sp|Q8K1A6|C2D1A_MOUSE	Q8K1A6	459	0.983	KKQNTPAASTTQLKSSPSKAPPSGPAPAGKA	S	P	S	K	5	2	3	0.347112	0.625886	0.0468148	0.119878	-0.278285	STYX	0.486499	0.072724	-0.0371973	0.765425	CENTER
C2D1B_502	sp|Q8BRN9|C2D1B_MOUSE	Q8BRN9	502	0.996	PAQAPLAKKPAQTLVSPSHLLTEPKASSSKE	S	P	S	H	4	2	2	-0.420051	0.15166	NA	-0.121662	0.199878	STYX	-0.134196	0.607279	0.0391082	0.980299	CENTER
C2D1B_513 514 515	sp|Q8BRN9|C2D1B_MOUSE	Q8BRN9	513 514 515	0.886	QTLVSPSHLLTEPKASSSKESLSPSVREQVT TLVSPSHLLTEPKASSSKESLSPSVREQVTL LVSPSHLLTEPKASSSKESLSPSVREQVTLL	S	S	S	K	5	2	3	-0.194919	-0.0359596	0.801282	0.440276	0.00984599	STYX	-0.115439	0.53438	0.417135	0.271994	CENTER
C2D1B_515	sp|Q8BRN9|C2D1B_MOUSE	Q8BRN9	515	0.988	LVSPSHLLTEPKASSSKESLSPSVREQVTLL	S	K	E	S	4	2	2	-0.318899	-0.0604664	0.363795	NA	-0.0433843	STYX	-0.189683	0.336999	0.160205	0.757832	CENTER
C2D1B_520	sp|Q8BRN9|C2D1B_MOUSE	Q8BRN9	520	0.996	HLLTEPKASSSKESLSPSVREQVTLLEARKL	S	P	S	V	5	2	3	0.907691	0.376378	0.382127	0.488237	-0.071508	STYX	0.642035	0.053654	0.266285	0.473772	CENTER
C43BP_375 376 377	sp|Q9EQG9|C43BP_MOUSE	Q9EQG9	375 376 377	0.881	SSVGTHRFVQKPYSRSSSMSSIDLVSASDDV SVGTHRFVQKPYSRSSSMSSIDLVSASDDVH VGTHRFVQKPYSRSSSMSSIDLVSASDDVHR	S	S	S	M	4	2	2	-0.0515761	-0.0657755	-0.0589209	-0.128525	NA	STYX	-0.0586758	0.762973	-0.0937227	0.671823	CENTER
C8AP2_1844	sp|Q9WUF3|C8AP2_MOUSE	Q9WUF3	1844	0.995	QRKDIDLSSEKTQRLSPNSDRNGDAHRKQAS	S	P	N	S	5	2	3	0.245002	-0.607535	0.526056	0.710237	0.417589	STYX	-0.181266	0.635977	0.551294	0.115979	CENTER
C8AP2_560	sp|Q9WUF3|C8AP2_MOUSE	Q9WUF3	560	0.999	KDLKLSFMEKLNLTLSPAKKQPACQDNPHQI	S	P	A	K	5	2	3	0.307557	0.656191	0.376928	0.111096	0.0190299	STYX	0.481874	0.0792886	0.169018	0.671285	CENTER
CA021_115	sp|Q8K207|CA021_MOUSE	Q8K207	115	0.996	FRMLDEKIEKGRDYCSEEEDIT_________	S	E	E	E	5	2	3	-0.352297	-0.464516	0.036089	-0.538044	-0.148996	STYX	-0.408407	0.0637251	-0.216984	0.375135	CENTER
CA021_95	sp|Q8K207|CA021_MOUSE	Q8K207	95	0.998	PGLVHQPRANMHISESQQEFFRMLDEKIEKG	S	Q	Q	E	5	2	3	-0.413521	-0.0551252	-0.067648	-0.783746	-0.58055	STYQ	-0.234323	0.277853	-0.477314	0.110824	CENTER
CA043_211	sp|Q8R092|CA043_MOUSE	Q8R092	211	0.996	SSQRQHQSAAKDLTQSPEMSPTTIQVTYLPS	S	P	E	M	4	2	2	0.0441326	0.132237	0.125332	0.138116	NA	STYX	0.0881846	0.581717	0.131724	0.796548	CENTER
CA052_156	sp|Q9CWU4|CA052_MOUSE	Q9CWU4	156	0.998	AKKARLLPEGEETVESDDDKDERASKIRRVE	S	D	D	D	5	2	3	-0.0394261	-0.0680974	-0.466802	-0.429663	-0.69162	STYX	-0.0537617	0.784514	-0.529362	0.0627122	CENTER
CA112_31	sp|Q3TQQ9|CA112_MOUSE	Q3TQQ9	31	1	ELSSWSEEMCRRELPSVLPRLLSMYQCSESW	S	V	L	P	5	2	3	0.189066	0.157755	0.838373	1.08956	1.62011	STYX	0.173411	0.332263	1.18268	0.0117974	NR
CA131_67	sp|Q8CIL4|CA131_MOUSE	Q8CIL4	67	0.999	ETIEDVAVEPLPLPGSPVRGQKKSASSFFQK	S	P	V	R	5	2	3	-0.448594	-0.00939347	-0.204927	-0.264961	-0.58995	STYX	-0.228994	0.325849	-0.353279	0.173696	CENTER
CA174_208	sp|Q80WR5|CA174_MOUSE	Q80WR5	208	0.97	VELMQDLPPASSSYPSMSRREFRKMHFRAKD	S	M	S	R	4	2	2	-0.403436	-0.165861	NA	-0.0913639	0.420657	STYX	-0.284648	0.16045	0.164646	0.760705	CENTER
CA198_176	sp|Q8C3W1|CA198_MOUSE	Q8C3W1	176	0.973	QGTQGSKPAQSSRSSSLDALGPARKEEEAPF	S	L	D	A	4	2	2	-0.445476	0.0160606	NA	-0.315028	-0.728262	STYX	-0.214708	0.365665	-0.521645	0.144274	CENTER
CAAP1_306 307	sp|Q8VDY9|CAAP1_MOUSE	Q8VDY9	306 307	0.889	RDIEKSVNEILGLAESSPKEPKVATLTVPPA DIEKSVNEILGLAESSPKEPKVATLTVPPAE	S	S	P	K	5	2	3	-0.196402	-0.0682919	-0.557195	-0.671625	-0.80995	STYX	-0.132347	0.465905	-0.67959	0.0296966	CENTER
CAAP1_307	sp|Q8VDY9|CAAP1_MOUSE	Q8VDY9	307	0.987	DIEKSVNEILGLAESSPKEPKVATLTVPPAE	S	P	K	E	5	2	3	-0.41324	-0.0217223	-0.59293	-0.531393	-0.117077	STYX	-0.217481	0.32524	-0.4138	0.132139	CENTER
CABS1_108	sp|Q8C633|CABS1_MOUSE	Q8C633	108	0.988	EITTPTETPNSKPKGSITENFIPVKIGNTSS	S	I	T	E	5	2	3	-0.381459	0.0679926	1.08911	0.465132	1.16434	STYX	-0.156733	0.495524	0.906192	0.0306093	NR
CABS1_121 122 123	sp|Q8C633|CABS1_MOUSE	Q8C633	121 122 123	0.884	KGSITENFIPVKIGNTSSPVGTVSLIDFSSN GSITENFIPVKIGNTSSPVGTVSLIDFSSNT SITENFIPVKIGNTSSPVGTVSLIDFSSNTA	T	S	S	P	5	2	3	-0.0361961	-0.227616	2.13201	0.142058	1.36876	STYX	-0.131906	0.482167	1.21427	0.0439409	NR
CABS1_123	sp|Q8C633|CABS1_MOUSE	Q8C633	123	0.997	SITENFIPVKIGNTSSPVGTVSLIDFSSNTA	S	P	V	G	5	2	3	-0.201595	-0.0892067	1.42709	1.19821	1.40598	STYX	-0.145401	0.419383	1.34376	0.00644784	NR
CABS1_242	sp|Q8C633|CABS1_MOUSE	Q8C633	242	1	TNIAEENVTEIKLIVSEDRPKTVTKLSDSEE	S	E	D	R	5	2	3	-0.381695	0.257455	1.29908	1.18941	1.38448	STYX	-0.0621198	0.797085	1.29099	0.00711582	NR
CABS1_253	sp|Q8C633|CABS1_MOUSE	Q8C633	253	0.996	KLIVSEDRPKTVTKLSDSEEEKFITVFELTN	S	D	S	E	5	2	3	0.551518	-0.144117	1.20704	1.32748	2.11747	STYX	0.2037	0.576635	1.55066	0.00566704	NR
CABS1_255	sp|Q8C633|CABS1_MOUSE	Q8C633	255	0.996	IVSEDRPKTVTKLSDSEEEKFITVFELTNSA	S	E	E	E	5	2	3	0.244162	0.0409795	1.20179	0.926314	1.5673	STYX	0.142571	0.442227	1.2318	0.00941793	NR
CABS1_269	sp|Q8C633|CABS1_MOUSE	Q8C633	269	0.999	DSEEEKFITVFELTNSAEKAKDNVEDPLNDE	S	A	E	K	5	2	3	-0.0136351	-0.175876	1.62564	0.28293	1.79559	STYX	-0.0947554	0.609642	1.23472	0.0276482	NR
CABS1_300	sp|Q8C633|CABS1_MOUSE	Q8C633	300	0.994	ESTDGANDWMEKETASEAESHAVLLTAVESR	S	E	A	E	5	2	3	-0.468939	0.137409	0.580256	1.25522	1.56023	STYX	-0.165765	0.55418	1.1319	0.0168592	NR
CABS1_376	sp|Q8C633|CABS1_MOUSE	Q8C633	376	0.999	IVDTLKDKEDLSTTNSGLFKLLKEEPDDLMM	S	G	L	F	5	2	3	-0.486396	0.130222	1.34132	1.22352	2.18797	STYX	-0.178087	0.531644	1.58427	0.0054973	NR
CABS1_95 96	sp|Q8C633|CABS1_MOUSE	Q8C633	95 96	0.895	IEGCLKLTTLPEKEITTPTETPNSKPKGSIT EGCLKLTTLPEKEITTPTETPNSKPKGSITE	T	T	P	T	5	2	3	0.104642	0.196611	1.30978	0.974139	1.58706	STYX	0.150626	0.392433	1.29033	0.00811971	NR
CABYR_124	sp|Q9D424|CABYR_MOUSE	Q9D424	124	0.999	NVAGPLFSNKTTQFPSVHAEVQSEETSEGAR	S	V	H	A	5	2	3	-0.120432	-0.289636	0.774237	0.199295	0.296013	STYX	-0.205034	0.273984	0.423181	0.241757	CENTER
CABYR_147	sp|Q9D424|CABYR_MOUSE	Q9D424	147	0.994	EETSEGARGPSDKPTTPKTDYTPPSSPPPAP	T	P	K	T	5	2	3	0.779615	-0.458719	1.55259	1.73943	1.20315	STYX	0.160448	0.930894	1.49839	0.00535161	NR
CABYR_256 257	sp|Q9D424|CABYR_MOUSE	Q9D424	256 257	0.895	QVVVGPVSEAEPPKASSAPLQGEQEPPAHEA VVVGPVSEAEPPKASSAPLQGEQEPPAHEAP	S	S	A	P	4	2	2	-0.830921	-0.116971	0.285846	0.60698	NA	STYX	-0.473946	0.131697	0.446413	0.293413	CENTER
CABYR_324	sp|Q9D424|CABYR_MOUSE	Q9D424	324	0.999	FTDHDQVACVKEIEQSPPGSPKAVEPKTKIS	S	P	P	G	5	2	3	-0.0840971	-0.107402	1.30387	1.22254	0.978352	STYX	-0.0957494	0.593423	1.16825	0.00985449	NR
CABYR_339	sp|Q9D424|CABYR_MOUSE	Q9D424	339	0.998	SPPGSPKAVEPKTKISIESLKTVQVEENSQH	S	I	E	S	5	2	3	-0.300417	-0.068462	1.67956	1.23556	0.957796	STYX	-0.184439	0.339497	1.29097	0.00851044	NR
CAC1H_1203	sp|O88427|CAC1H_MOUSE	O88427	1203	1	GASPGPRATPLRRAESLGHRSTMDLCPPRPA	S	L	G	H	5	2	3	1.13138	-0.255059	1.0657	0.521905	0.304146	STYX	0.438158	0.64435	0.630585	0.100828	CENTER
CAC1H_2201	sp|O88427|CAC1H_MOUSE	O88427	2201	0.998	SELEPALGARRKKKMSPPCISIDPPTEDEGS	S	P	P	C	5	2	3	-0.373944	-0.274343	0.318345	0.523437	0.105929	STYX	-0.324144	0.10618	0.315904	0.367243	CENTER
CAC1H_32	sp|O88427|CAC1H_MOUSE	O88427	32	0.997	ASPSAPAAPVRASPASPGVPGREEQRGSGSS	S	P	G	V	5	2	3	0.674202	-0.00618372	0.261738	0.515852	0.192435	STYX	0.334009	0.297337	0.323342	0.347854	CENTER
CACB1_205	sp|Q8R3Z5|CACB1_MOUSE	Q8R3Z5	205	0.997	SSSSLGDVVTGTRRPTPPASAKQKQKSTEHV	T	P	P	A	4	2	2	0.0307915	0.354466	0.690229	NA	0.842243	STYX	0.192629	0.365426	0.766236	0.0945756	CENTER
CACL1_366	sp|Q8R0X2|CACL1_MOUSE	Q8R0X2	366	0.997	GDQSRKRAGDELAYNSPSACASSRGYR____	S	P	S	A	4	2	2	0.240294	0.132838	0.140067	NA	-0.0358599	STYX	0.186566	0.311378	0.0521034	0.986962	CENTER
CACO1_208	sp|Q8CGU1|CACO1_MOUSE	Q8CGU1	208	0.998	QEHSELTEQYKGLSRSHGELSEERDILSQQQ	S	H	G	E	5	2	3	0.0851197	-0.20043	0.0608438	-0.039924	0.472822	STYX	-0.0576553	0.775187	0.16458	0.705799	CENTER
CACO1_560 561 562 563	sp|Q8CGU1|CACO1_MOUSE	Q8CGU1	560 561 562 563	0.897	EDMRLPSYGLCESGNTSSSPPGPREPSSLVV DMRLPSYGLCESGNTSSSPPGPREPSSLVVI MRLPSYGLCESGNTSSSPPGPREPSSLVVIN RLPSYGLCESGNTSSSPPGPREPSSLVVINQ	T	S	S	S	5	2	3	-0.10133	0.0505186	0.192779	0.0162557	0.592614	STYX	-0.0254056	0.912127	0.267216	0.480313	CENTER
CACO1_563	sp|Q8CGU1|CACO1_MOUSE	Q8CGU1	563	0.991	RLPSYGLCESGNTSSSPPGPREPSSLVVINQ	S	P	P	G	5	2	3	-0.11653	-0.0195993	-0.0320323	0.0576953	0.464298	STYX	-0.0680647	0.716666	0.16332	0.707456	CENTER
CADM1_436	sp|Q8R5M8|CADM1_MOUSE	Q8R5M8	436	0.999	FTHEAKGADDAADADTAIINAEGGQNNSEEK	T	A	I	I	4	2	2	0.0586154	-0.45745	-0.157026	-0.704141	NA	STYX	-0.199417	0.428056	-0.430583	0.223278	CENTER
CADM1_448	sp|Q8R5M8|CADM1_MOUSE	Q8R5M8	448	0.999	DADTAIINAEGGQNNSEEKKEYFI_______	S	E	E	K	5	2	3	0.405456	-0.506157	0.335886	0.346244	0.0601693	STYX	-0.0503506	0.855455	0.247433	0.484892	CENTER
CADM4_83	sp|Q8R464|CADM4_MOUSE,sp|Q9EPQ8|TCF20_MOUSE	Q8R464	83	1	GTRALKDERFQLEEFSPRRVRIRLSDARLED	S	P	R	R	5	2	3	0.379764	0.997291	0.875986	0.30376	0.159708	STYX	0.688527	0.0508427	0.446485	0.233603	CENTER
CAF1A_293 294	sp|Q9QWF0|CAF1A_MOUSE	Q9QWF0	293 294	0.89	SPEGPSTPPEHRGGRSSPSTPACRVAKNFVK PEGPSTPPEHRGGRSSPSTPACRVAKNFVKG	S	S	P	S	4	2	2	0.893164	0.236341	0.0573269	0.0181811	NA	STYX	0.564753	0.0862653	0.037754	0.982221	CENTER
CAF1A_294	sp|Q9QWF0|CAF1A_MOUSE	Q9QWF0	294	0.989	PEGPSTPPEHRGGRSSPSTPACRVAKNFVKG	S	P	S	T	5	2	3	-0.171155	0.383163	0.113698	0.425089	0.0370315	STYX	0.106004	0.731177	0.191939	0.621665	CENTER
CAF1B_439 440	sp|Q9D0N7|CAF1B_MOUSE	Q9D0N7	439 440	0.882	EGTPSNRTQDPSSPCTTPSPTTQSPAPSAIK GTPSNRTQDPSSPCTTPSPTTQSPAPSAIKD	T	T	P	S	4	2	2	0.0767549	-0.116861	0.225581	0.206931	NA	STYX	-0.0200533	0.934563	0.216256	0.614578	CENTER
CAGE1_777 778 779	sp|Q5IR70|CAGE1_MOUSE	Q5IR70	777 778 779	0.894	NDKYRRHVGSLINKVTSYEEIIKCADQRLEI DKYRRHVGSLINKVTSYEEIIKCADQRLEIS KYRRHVGSLINKVTSYEEIIKCADQRLEISH	T	S	Y	E	5	2	3	-0.129297	-0.0834505	0.931731	1.20244	1.38978	STYX	-0.106374	0.549365	1.17465	0.0101062	NR
CALM1_102	sp|P0DP26|CALM1_MOUSE,sp|P0DP27|CALM2_MOUSE,sp|P0DP28|CALM3_MOUSE	P0DP26	102	0.998	REAFRVFDKDGNGYISAAELRHVMTNLGEKL	S	A	A	E	5	2	3	-0.393628	-0.0787322	0.980545	0.272838	0.584092	STYX	-0.23618	0.256464	0.612492	0.104375	CENTER
CALR_115	sp|P14211|CALR_MOUSE	P14211	115	1	EQNIDCGGGYVKLFPSGLDQKDMHGDSEYNI	S	G	L	D	5	2	3	0.216128	0.243057	0.123287	-0.752973	0.129801	STYX	0.229593	0.23301	-0.166628	0.565851	CENTER
CALX_553	sp|P35564|CALX_MOUSE	P35564	553	0.997	RDEEEEEEKLEEKQKSDAEEDGVTGSQDEED	S	D	A	E	4	2	2	0.61405	-0.249892	-0.156054	0.43318	NA	STYX	0.182079	0.73779	0.138563	0.825938	CENTER
CALX_563	sp|P35564|CALX_MOUSE	P35564	563	0.999	EEKQKSDAEEDGVTGSQDEEDSKPKAEEDEI	S	Q	D	E	5	2	3	0.650523	-0.180302	-0.0968052	0.305956	1.02247	STYQ	0.235111	0.60288	0.41054	0.344029	CENTER
CALX_582	sp|P35564|CALX_MOUSE	P35564	582	1	EDSKPKAEEDEILNRSPRNRKPRRE______	S	P	R	N	5	2	3	0.028504	0.179233	-0.368509	-0.270468	0.0634147	STYX	0.103868	0.543301	-0.191854	0.396685	CENTER
CAMLG_55	sp|P49070|CAMLG_MOUSE	P49070	55	0.986	QRINRIMGFHRPGSGSEEENQTKSKPQDSDK	S	E	E	E	5	2	3	0.154112	-0.079742	-0.444999	-0.557524	-0.441565	STYX	0.0371852	0.822383	-0.481363	0.077337	CENTER
CAMP1_1133	sp|A2AHC3|CAMP1_MOUSE	A2AHC3	1133	0.981	TLPQSRSLPPSTHPRSPSDPGGELPEKCLFD	S	P	S	D	5	2	3	-0.00851731	-0.324428	-0.583567	-0.910378	-0.900604	STYX	-0.166473	0.415375	-0.798183	0.0185089	CENTER
CAMP1_1135	sp|A2AHC3|CAMP1_MOUSE	A2AHC3	1135	0.996	PQSRSLPPSTHPRSPSDPGGELPEKCLFDSY	S	D	P	G	5	2	3	0.0327108	0.217537	-0.578811	-0.999752	-0.920366	STYX	0.125124	0.486105	-0.832976	0.0167302	NR
CAMP1_1407	sp|A2AHC3|CAMP1_MOUSE	A2AHC3	1407	0.999	PESVYSGGTPSHRVESLEALPILSRNPSRST	S	L	E	A	5	2	3	-0.796257	0.0638297	-0.393102	-0.499748	-0.426709	STYX	-0.366214	0.337113	-0.439853	0.097152	CENTER
CAMP1_374	sp|A2AHC3|CAMP1_MOUSE	A2AHC3	374	0.998	PPVPISNATKRSFLGSPAAMSPADQPPSTQP	S	P	A	A	4	2	2	-0.0493977	-0.171745	NA	-0.189286	-0.0165512	STYX	-0.110571	0.544048	-0.102919	0.655328	CENTER
CAMP1_550	sp|A2AHC3|CAMP1_MOUSE	A2AHC3	550	0.996	EDEDEELVAIIRTDVSPPSPQMPRTSPQAPG	S	P	P	S	5	2	3	-0.198351	0.0752598	-0.460382	-0.174793	0.031634	STYX	-0.0615457	0.757659	-0.20118	0.389131	CENTER
CAMP1_553	sp|A2AHC3|CAMP1_MOUSE	A2AHC3	553	0.998	DEELVAIIRTDVSPPSPQMPRTSPQAPGLVA	S	P	Q	M	5	2	3	0.0772097	0.0202883	-0.382331	-0.485565	-0.305669	STYX	0.048749	0.738894	-0.391189	0.129482	CENTER
CAMP1_559 560	sp|A2AHC3|CAMP1_MOUSE	A2AHC3	559 560	0.899	IIRTDVSPPSPQMPRTSPQAPGLVASIRSPQ IRTDVSPPSPQMPRTSPQAPGLVASIRSPQR	T	S	P	Q	5	2	3	-0.156974	0.0347827	-0.228251	-0.143438	-0.540723	STYX	-0.0610958	0.748599	-0.304137	0.227307	CENTER
CAMP1_559 560 569	sp|A2AHC3|CAMP1_MOUSE	A2AHC3	559 560 569	0.899	IIRTDVSPPSPQMPRTSPQAPGLVASIRSPQ IRTDVSPPSPQMPRTSPQAPGLVASIRSPQR PQMPRTSPQAPGLVASIRSPQRQADTLESKP	T	S	P	Q	5	2	3	-0.183316	0.0386609	0.0707753	-0.312622	-0.37573	STYX	-0.0723276	0.708443	-0.205859	0.372212	CENTER
CAMP1_559 560 572	sp|A2AHC3|CAMP1_MOUSE	A2AHC3	559 560 572	0.889	IIRTDVSPPSPQMPRTSPQAPGLVASIRSPQ IRTDVSPPSPQMPRTSPQAPGLVASIRSPQR PRTSPQAPGLVASIRSPQRQADTLESKPDSF	T	S	P	Q	5	2	3	-0.238656	0.0088998	-0.183072	-0.371364	0.0395748	STYX	-0.114878	0.549215	-0.17162	0.437891	CENTER
CAMP1_560	sp|A2AHC3|CAMP1_MOUSE	A2AHC3	560	0.984	IRTDVSPPSPQMPRTSPQAPGLVASIRSPQR	S	P	Q	A	5	2	3	-0.42447	0.077953	-0.0693935	-0.338396	-0.152355	STYX	-0.173259	0.481466	-0.186715	0.398954	CENTER
CAMP1_788 789	sp|A2AHC3|CAMP1_MOUSE	A2AHC3	788 789	0.879	MKVKEHEDKDDASGRSSPCLSTTSQLSSMSM KVKEHEDKDDASGRSSPCLSTTSQLSSMSMA	S	S	P	C	5	2	3	0.130881	-0.113523	-0.304664	-0.372946	-0.0873691	STYX	0.00867905	0.942352	-0.254993	0.282517	CENTER
CAMP1_789	sp|A2AHC3|CAMP1_MOUSE	A2AHC3	789	0.995	KVKEHEDKDDASGRSSPCLSTTSQLSSMSMA	S	P	C	L	5	2	3	-0.047909	-0.172233	-0.323206	-0.504067	0.0209739	STYX	-0.110071	0.545768	-0.268766	0.280175	CENTER
CAMP1_823	sp|A2AHC3|CAMP1_MOUSE	A2AHC3	823	0.996	VKMTSFAERKLQRLNSCETKSSTSSSQKTTP	S	C	E	T	5	2	3	1.05347	-0.986688	0.31377	-0.124907	-0.5233	STYX	0.0333931	0.954988	-0.111479	0.603762	CENTER
CAMP2_1291	sp|Q8C1B1|CAMP2_MOUSE	Q8C1B1	1291	0.998	SGKRTPRSESVEGFLSPSRCGSRNGEKDWEN	S	P	S	R	5	2	3	-0.399604	-0.0578869	-0.37078	-0.277745	-0.322634	STYX	-0.228746	0.282263	-0.32372	0.186977	CENTER
CAMP2_943	sp|Q8C1B1|CAMP2_MOUSE	Q8C1B1	943	0.993	AAAPFSSDSPRPTHPSPQSSTRKSASFSVKN	S	P	Q	S	4	2	2	-0.159068	0.115429	0.167344	-0.127657	NA	STYX	-0.0218195	0.917574	0.0198439	0.936282	CENTER
CAMP3_1077	sp|Q80VC9|CAMP3_MOUSE	Q80VC9	1077	0.995	APNNLGVKRPTSRAPSPSGLMSPSRLPGSRE	S	P	S	G	5	2	3	0.0181856	-0.0904286	-0.827283	-0.791792	-0.836726	STYX	-0.0361215	0.861731	-0.8186	0.0160867	CENTER
CAMP3_334	sp|Q80VC9|CAMP3_MOUSE	Q80VC9	334	1	PDFVQAKDLPDGHAVSPRNTETVPSQNNSGS	S	P	R	N	5	2	3	0.510526	-0.122925	-0.471803	-0.321718	-0.432051	STYX	0.1938	0.552974	-0.408524	0.116482	CENTER
CAMP3_347	sp|Q80VC9|CAMP3_MOUSE	Q80VC9	347	0.997	AVSPRNTETVPSQNNSGSSSPVFNFRHPLLS	S	G	S	S	5	2	3	0.124338	-0.206985	-0.279406	-0.124919	-0.170282	STYX	-0.0413236	0.844869	-0.191536	0.384921	CENTER
CAMP3_349 350 351	sp|Q80VC9|CAMP3_MOUSE	Q80VC9	349 350 351	0.896	SPRNTETVPSQNNSGSSSPVFNFRHPLLSPG PRNTETVPSQNNSGSSSPVFNFRHPLLSPGG RNTETVPSQNNSGSSSPVFNFRHPLLSPGGP	S	S	S	P	5	2	3	-0.0130221	-0.190751	-0.596836	-0.508984	-0.338181	STYX	-0.101886	0.584885	-0.481334	0.0806131	CENTER
CAMP3_351	sp|Q80VC9|CAMP3_MOUSE	Q80VC9	351	0.993	RNTETVPSQNNSGSSSPVFNFRHPLLSPGGP	S	P	V	F	5	2	3	-0.0714623	0.0985624	0.120167	-0.660547	-0.324153	STYX	0.01355	0.910967	-0.288178	0.284136	CENTER
CAMP3_362	sp|Q80VC9|CAMP3_MOUSE	Q80VC9	362	0.999	SGSSSPVFNFRHPLLSPGGPQSPLRGSTGSL	S	P	G	G	5	2	3	-0.104964	-0.201381	-0.639002	-0.596445	-0.114644	STYX	-0.153172	0.393867	-0.45003	0.11397	CENTER
CAMP3_368	sp|Q80VC9|CAMP3_MOUSE	Q80VC9	368	0.996	VFNFRHPLLSPGGPQSPLRGSTGSLKSSPSM	S	P	L	R	5	2	3	-0.376184	-0.0787982	-0.490369	-0.182434	-0.648385	STYX	-0.227491	0.266842	-0.440396	0.111944	CENTER
CAMP3_431 432	sp|Q80VC9|CAMP3_MOUSE	Q80VC9	431 432	0.896	DVDVVMGDPVLLRSVSSDSLGPPRPVSTSSR VDVVMGDPVLLRSVSSDSLGPPRPVSTSSRN	S	S	D	S	5	2	3	-0.294483	-0.141156	-0.15997	-0.779271	-0.761043	STYX	-0.21782	0.244084	-0.566761	0.0697456	CENTER
CAMP3_548	sp|Q80VC9|CAMP3_MOUSE	Q80VC9	548	0.998	CSTGEILKPPPPSEGSPKAVASSPAANNSEV	S	P	K	A	5	2	3	-0.217443	-0.0882328	-0.391003	-0.114171	-0.73069	STYX	-0.152838	0.399825	-0.411955	0.142348	CENTER
CAMP3_767	sp|Q80VC9|CAMP3_MOUSE	Q80VC9	767	0.999	AASPSPARRAPAARRSPGPGPSPTPRSPKHA	S	P	G	P	5	2	3	0.067372	0.105901	-0.817136	-0.761239	-0.340287	STYX	0.0866364	0.584653	-0.639554	0.0417474	CENTER
CAMP3_797	sp|Q80VC9|CAMP3_MOUSE	Q80VC9	797	0.999	ARPAELKLAPLTRVLTPPHDVDSLPHLRKFS	T	P	P	H	5	2	3	0.124357	-0.128674	-0.472073	-0.149837	-0.38074	STYX	-0.0021583	0.99322	-0.334217	0.185448	CENTER
CAMP3_812	sp|Q80VC9|CAMP3_MOUSE	Q80VC9	812	0.989	TPPHDVDSLPHLRKFSPSQVPVQTRSSILLS	S	P	S	Q	5	2	3	-0.181893	0.00564813	-1.67497	-1.57726	-1.77534	STYX	-0.0881223	0.637343	-1.67586	0.00320647	NR
CAMP3_903	sp|Q80VC9|CAMP3_MOUSE	Q80VC9	903	1	KDEDKPEDEMAQKRASLLERQQRRVEEARRR	S	L	L	E	5	2	3	-0.142554	0.0100698	-0.686525	-0.626832	-0.340221	STYX	-0.0662423	0.722222	-0.551192	0.0586601	CENTER
CAND1_1220	sp|Q6ZQ38|CAND1_MOUSE	Q6ZQ38	1220	0.993	NPELAAIFESIQKDSSSTNLESMDTS_____	S	S	T	N	5	2	3	0.132761	0.151341	0.480764	0.120572	1.47704	STYX	0.142051	0.404123	0.69279	0.134018	CENTER
CAP1_309	sp|P40124|CAP1_MOUSE	P40124	309	0.997	SGPKPFSAPKPQTSPSPKPATKKEPALLELE	S	P	K	P	4	2	2	0.374555	0.274224	0.578874	0.417577	NA	STYX	0.32439	0.135163	0.498225	0.237412	CENTER
CAPR2_384	sp|Q05A80|CAPR2_MOUSE	Q05A80	384	0.998	KQQVPITPVSQWKPESPKSKVGSPQEEQNVQ	S	P	K	S	5	2	3	0.626552	-0.0851433	-0.0395663	-0.297428	-0.310858	STYX	0.270704	0.435042	-0.215951	0.34316	CENTER
CAPR2_391	sp|Q05A80|CAPR2_MOUSE	Q05A80	391	0.999	PVSQWKPESPKSKVGSPQEEQNVQETPKPWV	S	P	Q	E	5	2	3	0.531276	0.247896	-0.344535	-0.181641	-0.208832	STYX	0.389586	0.111975	-0.245003	0.290701	CENTER
CAPR2_853	sp|Q05A80|CAPR2_MOUSE	Q05A80	853	0.99	QANSRAGWSDSSQVSSPERDSETFNSGDSGL	S	P	E	R	4	2	2	-0.0782103	-0.00813485	NA	-0.227373	-0.154814	STYX	-0.0431726	0.830009	-0.191094	0.475458	CENTER
CAR14_276	sp|Q99KF0|CAR14_MOUSE	Q99KF0	276	0.922	GEELNRLKEENEKLRSMTFSLVEKDILEQSL	S	M	T	F	4	2	2	0.471566	-0.208163	-1.69162	NA	-0.2036	STYX	0.131701	0.738215	-0.947611	0.113384	NR
CARF_234	sp|Q8BI72|CARF_MOUSE	Q8BI72	234	0.996	GSGKALESEAPHKRGSASFVSSLLKSSMNSH	S	A	S	F	5	2	3	-0.208616	0.246034	0.127174	0.4275	0.507887	STYX	0.0187092	0.960189	0.354187	0.308196	CENTER
CARL1_1103	sp|Q6EDY6|CARL1_MOUSE	Q6EDY6	1103	0.998	VLMTEELSSPKGAMRSPPVDTTRKEIKAAEH	S	P	P	V	5	2	3	-0.314747	0.100189	0.272162	0.24563	0.312575	STYX	-0.107279	0.625736	0.276789	0.40993	CENTER
CARL1_1130	sp|Q6EDY6|CARL1_MOUSE	Q6EDY6	1130	0.999	AAEHNGAPDRTEEIKTPEPLEEGPAEEAGRA	T	P	E	P	5	2	3	0.0264625	-0.356846	-0.146915	-0.196533	0.632953	STYX	-0.165192	0.444436	0.0965015	0.953649	CENTER
CARL1_122	sp|Q6EDY6|CARL1_MOUSE	Q6EDY6	122	1	LAHIGTCLRRIFPGLSPLRIMKKVSMEPSER	S	P	L	R	5	2	3	-0.181341	0.0855562	-0.162617	-0.121722	0.704033	STYX	-0.0478923	0.811978	0.139898	0.855648	CENTER
CARL1_1294 1295	sp|Q6EDY6|CARL1_MOUSE	Q6EDY6	1294 1295	0.893	TASRPEDTPDSPSGPSSPKVALLPPILKKVS ASRPEDTPDSPSGPSSPKVALLPPILKKVSS	S	S	P	K	5	2	3	0.0182074	-0.194857	-0.29538	-0.409208	-0.400167	STYX	-0.088325	0.643543	-0.368252	0.14517	CENTER
CARL1_1295	sp|Q6EDY6|CARL1_MOUSE	Q6EDY6	1295	0.996	ASRPEDTPDSPSGPSSPKVALLPPILKKVSS	S	P	K	V	5	2	3	-0.0384826	-0.11639	-0.252237	-0.537382	-0.445848	STYX	-0.0774362	0.676885	-0.411822	0.119052	CENTER
CARL1_1363	sp|Q6EDY6|CARL1_MOUSE	Q6EDY6	1363	1	RSSGKDGHQGSKCSDSGEEAEKEFIFV____	S	G	E	E	5	2	3	-0.605684	-0.100414	0.0242845	-0.462731	-0.344138	STYX	-0.353049	0.168304	-0.260862	0.287926	CENTER
CARL1_920	sp|Q6EDY6|CARL1_MOUSE	Q6EDY6	920	0.999	LTEVERLEDLDTCMMTPKSKRKSIHSRMLRP	T	P	K	S	5	2	3	0.107415	-0.0678342	-0.660105	-0.478258	-0.136872	STYX	0.0197904	0.881407	-0.425078	0.125083	CENTER
CARL1_972	sp|Q6EDY6|CARL1_MOUSE	Q6EDY6	972	0.992	IEDPPFPSVRQEKRSSGLISELPSEEGRRLE	S	G	L	I	5	2	3	0.142306	-0.0251054	-0.489532	-0.809481	-0.90381	STYX	0.0586001	0.71104	-0.734275	0.0252611	CENTER
CASC3_145	sp|Q8K3W3|CASC3_MOUSE	Q8K3W3	145	0.999	EEKPESKGTVTGERQSGDGQESTEPVENKVG	S	G	D	G	4	2	2	0.854595	0.418076	0.378287	0.467379	NA	STYX	0.636335	0.0501133	0.422833	0.304848	CENTER
CASC3_262 263	sp|Q8K3W3|CASC3_MOUSE	Q8K3W3	262 263	0.899	PDDIKPRRIRKPRFGSSPQRDPNWIGDRSSK DDIKPRRIRKPRFGSSPQRDPNWIGDRSSKS	S	S	P	Q	5	2	3	-0.0659883	0.139318	0.375741	-0.157573	0.31715	STYX	0.036665	0.81128	0.17844	0.65724	CENTER
CASC3_263	sp|Q8K3W3|CASC3_MOUSE	Q8K3W3	263	0.985	DDIKPRRIRKPRFGSSPQRDPNWIGDRSSKS	S	P	Q	R	5	2	3	0.326264	0.342405	0.331878	0.40716	0.452861	STYX	0.334335	0.127034	0.3973	0.23642	CENTER
CASC3_36	sp|Q8K3W3|CASC3_MOUSE	Q8K3W3	36	0.985	SGSDSGSPARGGGSCSGSVGGGGSGSLPSQR	S	G	S	V	4	2	2	0.0561087	-0.0439278	0.171793	-0.150647	NA	STYX	0.00609045	0.933936	0.0105733	0.913319	CENTER
CASC3_44	sp|Q8K3W3|CASC3_MOUSE	Q8K3W3	44	0.996	ARGGGSCSGSVGGGGSGSLPSQRGGRGGGLH	S	G	S	L	4	2	2	0.546839	-0.189808	0.0407173	0.118388	NA	STYX	0.178516	0.659518	0.0795525	0.917461	CENTER
CASK_90	sp|P06796|CASK_MOUSE	P06796	90	0.999	PYMYYPLVVRLLLLRSPAPISKWQSMPNFPQ	S	P	A	P	5	2	3	-0.0180239	0.797521	-0.378653	-0.0183072	0.177339	STYX	0.389749	0.292615	-0.0732072	0.67948	CENTER
CASP6_62	sp|O08738|CASP6_MOUSE	O08738	62	1	RRGTNADRDNLTRRFSDLGFEVKCFNDLRAE	S	D	L	G	5	2	3	-0.0720659	0.0768105	-0.526169	-0.644878	-0.46328	STYX	0.00237232	0.957947	-0.544776	0.0562335	CENTER
CASP8_188	sp|O89110|CASP8_MOUSE	O89110	188	1	GKIEDYERSSTERRMSLEGREELPPSVLDEM	S	L	E	G	5	2	3	-0.154996	0.434867	-0.935044	-1.70476	-1.40132	STYX	0.139936	0.664088	-1.34704	0.00510787	NR
CATIN_148	sp|Q9CS00|CATIN_MOUSE	Q9CS00	148	0.993	PGSSASSLDSPRRSRSPGTATLALSQQQSLQ	S	P	G	T	5	2	3	0.309053	-0.326846	-0.103639	0.272247	-0.00866789	STYX	-0.0088965	0.928568	0.0533136	0.98449	CENTER
CATIP_346	sp|B9EKE5|CATIP_MOUSE	B9EKE5	346	1	VTFAAEHFRPFAALRSPIPALRSSHQPSPFR	S	P	I	P	4	2	2	-0.268835	-0.2071	0.728892	0.161602	NA	STYX	-0.237968	0.19862	0.445247	0.325544	CENTER
CATIP_358	sp|B9EKE5|CATIP_MOUSE	B9EKE5	358	0.996	ALRSPIPALRSSHQPSPFRTLENEEEEEAKE	S	P	F	R	5	2	3	-0.766656	0.530272	0.55325	1.03077	1.41412	STYX	-0.118192	0.837476	0.999381	0.0230545	NR
CAVN1_21	sp|O54724|CAVN1_MOUSE	O54724	21	0.998	LHIVERPYSGFPDASSEGPEPTQGEARATEE	S	E	G	P	4	2	2	-0.445133	-0.411882	-0.23035	-0.681284	NA	STYX	-0.428507	0.0547092	-0.455817	0.189447	CENTER
CAVN1_302	sp|O54724|CAVN1_MOUSE	O54724	302	0.959	ERREKLKTSRDKLRKSFTPDHVVYARSKTAV	S	F	T	P	4	2	2	-0.990642	0.0270897	-0.761956	NA	-0.115108	STYX	-0.481776	0.274478	-0.438532	0.232318	CENTER
CAVN1_42	sp|O54724|CAVN1_MOUSE	O54724	42	0.999	TQGEARATEEPSGTGSDELIKSDQVNGVLVL	S	D	E	L	5	2	3	-0.111974	-0.441365	-0.763069	-0.88545	-0.438516	STYX	-0.276669	0.198148	-0.695678	0.0303225	CENTER
CAVN2_241	sp|Q63918|CAVN2_MOUSE	Q63918	241	1	SRAEKIKRSSLKKVDSLKKAFSRQNIEKKMN	S	L	K	K	5	2	3	2.23757	-1.41536	0.609716	0.956462	-0.611713	STYX	0.411102	0.995465	0.318155	0.499395	CENTER
CAVN2_287 288 293	sp|Q63918|CAVN2_MOUSE	Q63918	287 288 293	0.881	KKSLTPNHQKASSGKSSPFKVSPLSFGRKKV KSLTPNHQKASSGKSSPFKVSPLSFGRKKVR NHQKASSGKSSPFKVSPLSFGRKKVREGESS	S	S	P	F	5	2	3	-0.100372	-0.644235	-0.534897	-0.389665	-0.20143	STYX	-0.372304	0.161593	-0.375331	0.148217	CENTER
CAVN2_293	sp|Q63918|CAVN2_MOUSE	Q63918	293	0.998	NHQKASSGKSSPFKVSPLSFGRKKVREGESS	S	P	L	S	5	2	3	-0.332447	-0.208031	-0.442738	-0.856939	-0.61014	STYX	-0.270239	0.161358	-0.636605	0.0389345	CENTER
CAVN4_334	sp|A2AMM0|CAVN4_MOUSE	A2AMM0	334	1	VTKGGYSPQEGGDPPTPEPLKVTFKPQVRVE	T	P	E	P	5	2	3	-0.362165	-0.119285	1.24532	1.36777	1.56113	STYX	-0.240725	0.225384	1.39141	0.00595729	NR
CB070_168	sp|Q9DAS2|CB070_MOUSE	Q9DAS2	168	0.992	LPPLSEKSKWNLLRLSPDYKRTYQTFPSGKR	S	P	D	Y	5	2	3	0.0899195	-0.142276	1.18083	1.1707	1.36511	STYX	-0.0261784	0.901425	1.23888	0.00802262	NR
CB081_238	sp|Q9DAQ4|CB081_MOUSE	Q9DAQ4	238	0.993	SKESLRSTAEGERVYSPQSSLKQPQVVRLQA	S	P	Q	S	5	2	3	-0.186979	0.0869852	1.00339	1.36781	1.52392	STYX	-0.0499968	0.805612	1.29837	0.0077436	NR
CBL_480 481	sp|P22682|CBL_MOUSE	P22682	480 481	0.898	LFMMKELAGAKVERPSSPFSMAPQASLPPVP FMMKELAGAKVERPSSPFSMAPQASLPPVPP	S	S	P	F	5	2	3	0.0331431	0.0114275	-0.0538961	-0.18603	-0.241006	STYX	0.0222853	0.857222	-0.160311	0.44826	CENTER
CBL_481	sp|P22682|CBL_MOUSE	P22682	481	0.996	FMMKELAGAKVERPSSPFSMAPQASLPPVPP	S	P	F	S	5	2	3	-0.246666	0.0700252	0.0251553	-0.312127	0.211389	STYX	-0.0883202	0.659844	-0.0251944	0.798755	CENTER
CBP_2064	sp|P45481|CBP_MOUSE	P45481	2064	0.991	VAGPRMPNVQPPRSISPSALQDLLRTLKSPS	S	P	S	A	5	2	3	-0.145782	-0.0538757	-0.186158	-0.493797	-0.124132	STYX	-0.0998288	0.580252	-0.268029	0.273255	CENTER
CBP_2079 2080	sp|P45481|CBP_MOUSE	P45481	2079 2080	0.86	SPSALQDLLRTLKSPSSPQQQQQVLNILKSN PSALQDLLRTLKSPSSPQQQQQVLNILKSNP	S	S	P	Q	5	2	3	-0.634843	0.104929	0.607796	0.160321	0.767534	STYX	-0.264957	0.429566	0.511884	0.161525	CENTER
CBPC5_539	sp|Q09M02|CBPC5_MOUSE	Q09M02	539	0.999	SVNSIPAACHDNGRASPPPPPAFPSRYTVEL	S	P	P	P	5	2	3	0.140386	0.0966787	0.266573	0.270405	-0.307946	STYX	0.118532	0.47372	0.076344	0.914498	CENTER
CBPC5_809	sp|Q09M02|CBPC5_MOUSE	Q09M02	809	0.988	SSPPTRRGMRGSSPTSPIPQTRESSELEPGP	S	P	I	P	5	2	3	0.379784	-0.00332306	0.318882	0.464333	1.26933	STYX	0.18823	0.40311	0.684182	0.0946926	CENTER
CBPC5_841	sp|Q09M02|CBPC5_MOUSE	Q09M02	841	0.999	SATPGLPQAGPPRPRSAPAFSPISCTLSDSP	S	A	P	A	5	2	3	-0.394713	-0.127021	0.188827	0.205718	0.0981594	STYX	-0.260867	0.199249	0.164235	0.665463	CENTER
CBX3_176	sp|P23198|CBX3_MOUSE	P23198	176	0.999	PQIVIAFYEERLTWHSCPEDEAQ________	S	C	P	E	5	2	3	-0.275486	-0.656844	-0.563687	-0.646541	0.0533629	STYX	-0.466165	0.064161	-0.385622	0.175842	CENTER
CBX3_93	sp|P23198|CBX3_MOUSE	P23198	93	0.994	NSQKAGKEKDGTKRKSLSDSESDDSKSKKKR	S	L	S	D	5	2	3	0.524324	0.0551449	-0.322256	-0.494197	-0.529538	STYX	0.289734	0.255239	-0.448664	0.0949908	CENTER
CBX3_95	sp|P23198|CBX3_MOUSE	P23198	95	0.995	QKAGKEKDGTKRKSLSDSESDDSKSKKKRDA	S	D	S	E	5	2	3	0.174383	0.0325524	-0.750683	-0.497369	-0.974687	STYX	0.103468	0.542928	-0.740913	0.024891	CENTER
CBX3_97	sp|P23198|CBX3_MOUSE	P23198	97	0.982	AGKEKDGTKRKSLSDSESDDSKSKKKRDAAD	S	E	S	D	5	2	3	0.21804	0.0878581	-0.505493	-0.738948	-1.11433	STYX	0.152949	0.393056	-0.786258	0.0222252	CENTER
CBX5_92 93	sp|Q61686|CBX5_MOUSE	Q61686	92 93	0.894	ENNKPREKSEGNKRKSSFSNSADDIKSKKKR NNKPREKSEGNKRKSSFSNSADDIKSKKKRE	S	S	F	S	5	2	3	0.0735534	0.439483	-1.301	-1.28383	-1.67709	STYX	0.256518	0.262503	-1.42064	0.00400398	NR
CBX5_93	sp|Q61686|CBX5_MOUSE	Q61686	93	0.993	NNKPREKSEGNKRKSSFSNSADDIKSKKKRE	S	F	S	N	5	2	3	0.247701	0.281819	-1.6935	-1.49098	-1.41738	STYX	0.26476	0.187346	-1.53396	0.00352164	NR
CBY1_20	sp|Q9D1C2|CBY1_MOUSE	Q9D1C2	20	0.989	GSIFSPKKTPPRKSASLSNLHSLDRSTRELE	S	L	S	N	5	2	3	0.240201	0.84123	0.492472	0.616788	0.474492	STYX	0.540715	0.0873012	0.527917	0.12539	CENTER
CC020_266	sp|Q8CDN1|CC020_MOUSE	Q8CDN1	266	0.999	PKPVDDVSPQPVRARTPPENTVVELPDPCPE	T	P	P	E	5	2	3	-0.0928336	-0.0424391	0.105627	-0.0660262	0.358271	STYX	-0.0676363	0.719105	0.132624	0.769431	CENTER
CC105_272	sp|Q9D4K7|CC105_MOUSE	Q9D4K7	272	0.998	EQAGRHSWVDITRPPTPRTQGLKTPPPDPIG	T	P	R	T	5	2	3	-0.281816	0.246183	0.0734573	0.445791	0.89969	STYX	-0.0178168	0.911324	0.472979	0.217542	CENTER
CC105_280	sp|Q9D4K7|CC105_MOUSE	Q9D4K7	280	0.997	VDITRPPTPRTQGLKTPPPDPIGTYTPACAK	T	P	P	P	5	2	3	-0.30133	-0.129209	1.18447	1.3294	1.07986	STYX	-0.21527	0.253644	1.19791	0.00897456	NR
CC116_117 118	sp|Q80X53|CC116_MOUSE	Q80X53	117 118	0.868	AGVPLVDIQDPVEVPSSRHRSRARPSIDTVH GVPLVDIQDPVEVPSSRHRSRARPSIDTVHR	S	S	R	H	5	2	3	-0.27092	-0.331166	0.602277	-0.276459	0.234992	STYX	-0.301043	0.12302	0.186937	0.682461	CENTER
CC116_127	sp|Q80X53|CC116_MOUSE	Q80X53	127	0.997	PVEVPSSRHRSRARPSIDTVHRHRARPTLCA	S	I	D	T	5	2	3	-0.241063	-0.107607	1.74173	0.994816	0.95104	STYX	-0.174335	0.338701	1.22919	0.0107517	NR
CC116_379 380	sp|Q80X53|CC116_MOUSE	Q80X53	379 380	0.893	NREARGEPCDSLTTAYSPKTSHRKSKGRRGS REARGEPCDSLTTAYSPKTSHRKSKGRRGSP	Y	S	P	K	5	2	3	0.0264183	-0.226904	0.714372	0.783887	0.747161	STYX	-0.100243	0.603743	0.748473	0.04353	CENTER
CC116_380	sp|Q80X53|CC116_MOUSE	Q80X53	380	0.982	REARGEPCDSLTTAYSPKTSHRKSKGRRGSP	S	P	K	T	4	2	2	-0.314667	-0.53509	0.310688	NA	0.910081	STYX	-0.424878	0.0643555	0.610384	0.187639	CENTER
CC116_394	sp|Q80X53|CC116_MOUSE	Q80X53	394	0.999	YSPKTSHRKSKGRRGSPPNAVQMATRFRLKV	S	P	P	N	5	2	3	-0.169415	-0.117398	0.196013	0.827781	0.364899	STYX	-0.143406	0.417441	0.462898	0.205393	CENTER
CC116_536	sp|Q80X53|CC116_MOUSE	Q80X53	536	0.977	RAGLEVLEQPLKGRGSFTHHF__________	S	F	T	H	4	2	2	0.25857	-0.141642	0.971532	NA	0.896451	STYX	0.0584639	0.806657	0.933991	0.0575431	NR
CC120_495	sp|A2AEV7|CC120_MOUSE,tr|E9PUJ8|E9PUJ8_MOUSE	A2AEV7	495	0.987	AMLPGPPPIYAADGSSPLLRSKDPNTRAIRS	S	P	L	L	5	2	3	-0.225412	-0.0969515	1.05176	1.26852	1.54973	STYX	-0.161182	0.37468	1.29	0.00771047	NR
CC124_117	sp|Q9D8X2|CC124_MOUSE	Q9D8X2	117	1	SLRREQRAEPVEKAKSHLELPLEENLNRRLQ	S	H	L	E	5	2	3	-0.380655	-0.35249	0.562218	-0.289955	0.24333	STYX	-0.366573	0.07814	0.171864	0.711165	CENTER
CC136_212	sp|Q3TVA9|CC136_MOUSE	Q3TVA9	212	0.998	LRAEMELKTSEPSNLSISDFSGIQDELHHLR	S	I	S	D	5	2	3	-0.125845	-0.207987	0.202433	0.0547406	0.0957195	STYX	-0.166916	0.350885	0.117631	0.791219	CENTER
CC136_277	sp|Q3TVA9|CC136_MOUSE	Q3TVA9	277	0.984	ATERWLESHLLRSTMSSESQTSELDFPEPDP	S	S	E	S	4	2	2	-0.297408	-0.163524	NA	-0.0989525	0.70862	STYX	-0.230466	0.217937	0.304834	0.565223	CENTER
CC136_277 278	sp|Q3TVA9|CC136_MOUSE	Q3TVA9	277 278	0.899	ATERWLESHLLRSTMSSESQTSELDFPEPDP TERWLESHLLRSTMSSESQTSELDFPEPDPV	S	S	E	S	5	2	3	-0.179984	-0.243268	0.00655037	-0.182771	0.39698	STYX	-0.211626	0.243856	0.0735863	0.946652	CENTER
CC136_750 751	sp|Q3TVA9|CC136_MOUSE	Q3TVA9	750 751	0.897	RSFEYCGKNSGSRAPSTENFHRSYESSIDEN SFEYCGKNSGSRAPSTENFHRSYESSIDENE	S	T	E	N	5	2	3	-0.207209	0.102923	1.26703	1.10497	0.60636	STYX	-0.0521435	0.798997	0.992789	0.0208282	NR
CC136_778	sp|Q3TVA9|CC136_MOUSE	Q3TVA9	778	0.988	DENEGYQKSYVSSQPSTETFLKSYDSSTSAN	S	T	E	T	5	2	3	-0.891416	0.432325	2.16759	0.967098	1.54574	STYX	-0.229545	0.756032	1.56014	0.00656788	NR
CC136_791	sp|Q3TVA9|CC136_MOUSE	Q3TVA9	791	0.997	QPSTETFLKSYDSSTSANEAFEKSYCSSSTS	S	A	N	E	4	2	2	-0.361742	0.10099	NA	0.727985	0.53334	STYX	-0.130376	0.574869	0.630663	0.15051	CENTER
CC136_803	sp|Q3TVA9|CC136_MOUSE	Q3TVA9	803	0.992	SSTSANEAFEKSYCSSSTSVSYKKSYGSVSS	S	S	T	S	5	2	3	-0.257478	0.0555152	1.64775	1.68646	1.80555	STYX	-0.100981	0.613826	1.71325	0.00397826	NR
CC138_64	sp|Q0VF22|CC138_MOUSE	Q0VF22	64	0.993	LSDFDQTKYKRRIVTSPDGLDTYSSGDKVGS	S	P	D	G	5	2	3	0.521475	0.278079	0.297611	0.647094	0.0360523	STYX	0.399777	0.102222	0.326919	0.372704	CENTER
CC138_92	sp|Q0VF22|CC138_MOUSE	Q0VF22	92	0.999	VGSSPRYYSDGRNHPTPPFCSSFKHLNVNCL	T	P	P	F	5	2	3	0.092948	0.303329	0.449596	-0.661995	0.525698	STYX	0.198139	0.311647	0.104433	0.815766	CENTER
CC14B_33 34 35	sp|Q6PFY9|CC14B_MOUSE	Q6PFY9	33 34 35	0.883	SRRSSSSSPGVKKSRSSTPQELHRLEQQDDL RRSSSSSPGVKKSRSSTPQELHRLEQQDDLY RSSSSSPGVKKSRSSTPQELHRLEQQDDLYL	S	S	T	P	4	2	2	-0.357692	-0.416209	0.360517	0.475762	NA	STYX	-0.38695	0.0694654	0.41814	0.310523	CENTER
CC151_559	sp|Q8BSN3|CC151_MOUSE	Q8BSN3	559	0.999	LPVASVKDKFFDEEESEDDDRDVVTRAAFKL	S	E	D	D	4	2	2	-0.0553005	-0.175265	NA	0.974823	0.981882	STYX	-0.115283	0.52737	0.978353	0.0510237	NR
CC157_175	sp|Q5SPX1|CC157_MOUSE	Q5SPX1	175	1	ARSPECMTAKFIKPPSPVPGLPLICQGLQSI	S	P	V	P	5	2	3	0.0945659	-0.162085	0.62693	0.732959	0.647653	STYX	-0.0337596	0.868103	0.669181	0.0631112	CENTER
CC157_198	sp|Q5SPX1|CC157_MOUSE	Q5SPX1	198	0.997	ICQGLQSIPVRVSLRSPGGTSEKTKSVYSQT	S	P	G	G	5	2	3	-0.273482	0.452427	0.352584	0.568948	0.624889	STYX	0.0894725	0.865093	0.515473	0.138205	CENTER
CC181_281	sp|Q80ZU5|CC181_MOUSE	Q80ZU5	281	1	IKKEESEAKGHVLPISPAGEPLAQVPQLLPN	S	P	A	G	5	2	3	-0.71464	0.00157906	1.01579	0.233329	0.479337	STYX	-0.35653	0.263511	0.576152	0.130814	CENTER
CC181_326	sp|Q80ZU5|CC181_MOUSE	Q80ZU5	326	0.998	KKARRSNHRIQSAGVSPVTSTYCLSPRQKEL	S	P	V	T	4	2	2	-0.137025	0.0179493	NA	-0.274079	0.24404	STYX	-0.0595379	0.753979	-0.0150195	0.854944	CENTER
CC181_335	sp|Q80ZU5|CC181_MOUSE	Q80ZU5	335	0.998	IQSAGVSPVTSTYCLSPRQKELQKQLERKRE	S	P	R	Q	5	2	3	0.0302404	-0.101587	0.224769	0.3496	0.89416	STYX	-0.0356735	0.864296	0.48951	0.187328	CENTER
CC181_66	sp|Q80ZU5|CC181_MOUSE	Q80ZU5	66	0.999	VLKENETETELGQQLSDPDNSPKDEALPRRN	S	D	P	D	4	2	2	0.353132	-0.357541	NA	0.14476	0.354955	STYX	-0.00220435	0.935637	0.249857	0.561211	CENTER
CC186_49	sp|Q8C9S4|CC186_MOUSE	Q8C9S4	49	0.994	TEKTSELRDDSCISVSGDESSRLETGAELLS	S	G	D	E	5	2	3	0.0174307	-0.0045703	-0.0616755	0.230106	1.08516	STYX	0.0064302	0.93161	0.417863	0.354119	CENTER
CC186_745	sp|Q8C9S4|CC186_MOUSE	Q8C9S4	745	0.979	GNHDKDISSMGSRSSSSGSLNARISAEDRSP	S	S	G	S	5	2	3	0.163631	0.20932	0.689525	0.673083	1.01337	STYX	0.186475	0.306402	0.791994	0.038496	CENTER
CC186_759	sp|Q8C9S4|CC186_MOUSE	Q8C9S4	759	0.996	SSSGSLNARISAEDRSPENTSSSVAVDNFPE	S	P	E	N	5	2	3	-0.60206	-0.304956	0.0946565	0.117916	0.333049	STYX	-0.453508	0.0608192	0.181874	0.628769	CENTER
CC187_31	sp|Q8C5V8|CC187_MOUSE	Q8C5V8	31	1	TLQNCSRGNQQEGLFSPKAMGRMAGQKDSTK	S	P	K	A	5	2	3	0.0166589	-0.0651864	0.712376	0.359737	0.689167	STYX	-0.0242638	0.922488	0.587094	0.10023	CENTER
CC187_349	sp|Q8C5V8|CC187_MOUSE	Q8C5V8	349	0.994	QDLRQQIQAGLELTRSPRVDRKLSLSKPKPQ	S	P	R	V	4	2	2	-0.00623516	0.0678223	NA	-0.018098	0.635359	STYX	0.0307936	0.820807	0.30863	0.524533	CENTER
CC189_323	sp|Q6NZQ0|CC189_MOUSE	Q6NZQ0	323	0.999	ERLSSKLAALEQPFQTPPSKGKTKTK_____	T	P	P	S	5	2	3	0.0625663	0.0622501	0.328473	0.286204	0.933316	STYX	0.0624082	0.680181	0.515998	0.164272	CENTER
CC85C_180	sp|E9Q6B2|CC85C_MOUSE	E9Q6B2	180	0.987	AGGAGGGGGGAGSRSSIDSQASLSGPLAGSA	S	I	D	S	5	2	3	0.0662541	0.0653089	-0.322555	-0.303357	-0.113622	STYX	0.0657815	0.666787	-0.246511	0.290611	CENTER
CC85C_247	sp|E9Q6B2|CC85C_MOUSE	E9Q6B2	247	0.998	GPHKVPDGKAGATRRSLDDLSAPPHHRSIPN	S	L	D	D	5	2	3	0.165818	-0.142886	0.728616	-0.53975	-0.691381	STYX	0.0114658	0.951761	-0.167505	0.475473	CENTER
CCAR1_1004	sp|Q8CH18|CCAR1_MOUSE	Q8CH18	1004	0.996	EALQEDMLGNRLLLPTPTIKQESKDGEENVG	T	P	T	I	4	2	2	-0.554982	0.0618901	-0.0181191	-0.109354	NA	STYX	-0.246546	0.389077	-0.0637365	0.741816	CENTER
CCAR1_624	sp|Q8CH18|CCAR1_MOUSE	Q8CH18	624	0.998	QDEEEKDDGEVKEIATPTHWSKLDPKAMKVN	T	P	T	H	4	2	2	-0.926166	0.457738	NA	0.442107	0.31566	STYX	-0.234214	0.770622	0.378883	0.356101	CENTER
CCAR2_222	sp|Q8VDP4|CCAR2_MOUSE	Q8VDP4	222	0.996	AGGEPWGAKKPRHDLSPYRVHLTPYTVDSPT	S	P	Y	R	5	2	3	-0.268347	0.950105	0.273042	0.73353	0.979919	STYX	0.340879	0.683401	0.662164	0.0833331	CENTER
CCAR2_677	sp|Q8VDP4|CCAR2_MOUSE	Q8VDP4	677	0.997	FAGAKLEETEVRSVASNQSEMEYSSLQDMPK	S	N	Q	S	5	2	3	0.277391	0.218674	0.372399	0.355146	0.604348	STYX	0.248032	0.207689	0.443964	0.194669	CENTER
CCD13_485	sp|D3YV10|CCD13_MOUSE	D3YV10	485	0.998	PADARFPEDQTPITNSPASAGDHVGRLGSSR	S	P	A	S	5	2	3	0.502859	-0.109123	0.476758	0.25452	0.293634	STYX	0.196868	0.529726	0.341637	0.310756	CENTER
CCD13_637 638 639 640	sp|D3YV10|CCD13_MOUSE	D3YV10	637 638 639 640	0.891	AANTKPNSAGSAKKDSSSTQLCDMPMESQIQ ANTKPNSAGSAKKDSSSTQLCDMPMESQIQE NTKPNSAGSAKKDSSSTQLCDMPMESQIQEL TKPNSAGSAKKDSSSTQLCDMPMESQIQELN	S	S	S	T	5	2	3	0.091863	-0.216058	0.278991	0.29894	0.318736	STYX	-0.0620976	0.760315	0.298889	0.370247	CENTER
CCD13_638	sp|D3YV10|CCD13_MOUSE	D3YV10	638	0.953	ANTKPNSAGSAKKDSSSTQLCDMPMESQIQE	S	S	T	Q	4	2	2	-0.452521	-0.247235	NA	0.436084	0.418091	STYX	-0.349878	0.0986349	0.427087	0.300554	CENTER
CCD25_204	sp|Q78PG9|CCD25_MOUSE	Q78PG9	204	1	LMKVENMSSNQDGNDSDEFM___________	S	D	E	F	5	2	3	-0.399017	-0.143731	-0.187633	-0.21451	-0.116123	STYX	-0.271374	0.180989	-0.172755	0.419835	CENTER
CCD27_118	sp|Q3V036|CCD27_MOUSE	Q3V036	118	0.987	SHVGSAIMVDLPRTCSGVWKLTEDHPLGRLG	S	G	V	W	5	2	3	-0.460944	-0.05526	0.931441	0.101978	0.681164	STYX	-0.258102	0.258071	0.571528	0.140256	CENTER
CCD27_12 13 14	sp|Q3V036|CCD27_MOUSE	Q3V036	12 13 14	0.862	____MKQENLTQECCSTSPKISKGLMVLQSI ___MKQENLTQECCSTSPKISKGLMVLQSIA __MKQENLTQECCSTSPKISKGLMVLQSIAS	S	T	S	P	5	2	3	0.0485597	-0.360248	0.630126	0.640395	0.784117	STYX	-0.155844	0.481817	0.684879	0.0590553	CENTER
CCD27_14	sp|Q3V036|CCD27_MOUSE	Q3V036	14	0.993	__MKQENLTQECCSTSPKISKGLMVLQSIAS	S	P	K	I	5	2	3	-0.284527	-0.188281	0.547313	0.72176	0.230033	STYX	-0.236404	0.205183	0.499702	0.160233	CENTER
CCD27_148	sp|Q3V036|CCD27_MOUSE	Q3V036	148	0.991	GSASSVDGRVFPFSKSACELNYPRKRSEPSD	S	A	C	E	5	2	3	-0.349752	-0.0718881	0.903753	0.308502	0.168547	STYX	-0.21082	0.293493	0.460268	0.222349	CENTER
CCD27_165	sp|Q3V036|CCD27_MOUSE	Q3V036	165	0.997	CELNYPRKRSEPSDPSPTGSPTVVKKSQRTR	S	P	T	G	5	2	3	0.0156114	-0.0460751	0.326962	0.621459	0.633335	STYX	-0.0152319	0.966379	0.527252	0.131316	CENTER
CCD34_11	sp|Q3UI66|CCD34_MOUSE	Q3UI66	11	0.986	_____MRAAGPWRAASPAPCTRYLARCKPGF	S	P	A	P	4	2	2	0.490384	0.246838	0.287826	NA	0.302292	STYX	0.368611	0.120256	0.295059	0.470505	CENTER
CCD39_888	sp|Q9D5Y1|CCD39_MOUSE	Q9D5Y1	888	0.998	SSRSSSQSSSLSSFRSLEDVTLQSPPTAKVI	S	L	E	D	5	2	3	0.427426	-0.0677311	0.565943	0.99387	0.503464	STYX	0.179847	0.490767	0.687759	0.0662923	CENTER
CCD39_896	sp|Q9D5Y1|CCD39_MOUSE	Q9D5Y1	896	0.999	SSLSSFRSLEDVTLQSPPTAKVIQLRFPEPP	S	P	P	T	5	2	3	0.445692	0.278534	0.579917	0.252677	0.832919	STYX	0.362113	0.116044	0.555171	0.127342	CENTER
CCD39_925	sp|Q9D5Y1|CCD39_MOUSE	Q9D5Y1	925	0.99	PPPATNDSSRSASSGSNSNIPKEKKLSK___	S	N	S	N	4	2	2	-0.247354	0.0453237	NA	0.375569	0.744005	STYX	-0.101015	0.609405	0.559787	0.20071	CENTER
CCD40_153	sp|Q8BI79|CCD40_MOUSE	Q8BI79	153	1	VESTGRAAPEGELEVSDHEKVEALLDELDEL	S	D	H	E	4	2	2	0.226157	-0.204542	NA	0.264202	1.47098	STYX	0.0108078	0.979752	0.86759	0.143438	NR
CCD40_306	sp|Q8BI79|CCD40_MOUSE	Q8BI79	306	1	LEETRIQFLDQVQSLSPEALLDRATEGSDEA	S	P	E	A	4	2	2	-0.0980642	-0.0637669	0.688236	NA	0.912003	STYX	-0.0809155	0.660252	0.800119	0.0864881	CENTER
CCD40_318	sp|Q8BI79|CCD40_MOUSE	Q8BI79	318	0.999	QSLSPEALLDRATEGSDEAEEEGSQLIVLDP	S	D	E	A	5	2	3	-0.469118	-0.200966	-0.0568421	-0.0804758	0.656308	STYX	-0.335042	0.119505	0.172997	0.742019	CENTER
CCD40_582	sp|Q8BI79|CCD40_MOUSE	Q8BI79	582	0.994	MDALRECQHQVKSTDSEIEVCKKSIMQEEEK	S	E	I	E	5	2	3	-0.199894	-0.159704	0.92552	0.836002	1.17248	STYX	-0.179799	0.31224	0.978002	0.018031	NR
CCD43_186	sp|Q9CR29|CCD43_MOUSE	Q9CR29	186	0.999	VLNARKLERDSLRDESQRKKEQDKLQREKDK	S	Q	R	K	4	2	2	-0.141912	-0.229913	-0.0333862	NA	0.0587709	STYQ	-0.185913	0.301426	0.0126923	0.919181	CENTER
CCD54_214	sp|Q9DAL3|CCD54_MOUSE	Q9DAL3	214	0.992	SSYPEPTGELKKKTTSPQNITLKKNNSLQNA	S	P	Q	N	5	2	3	0.0289262	-0.314118	0.614504	0.405619	0.845335	STYX	-0.142596	0.492752	0.621819	0.0864273	CENTER
CCD54_225	sp|Q9DAL3|CCD54_MOUSE	Q9DAL3	225	0.999	KKTTSPQNITLKKNNSLQNASVGCKKVRSNI	S	L	Q	N	5	2	3	-0.00415114	-0.30374	0.904473	1.14351	1.10862	STYX	-0.153945	0.443565	1.0522	0.0136549	NR
CCD57_922	sp|Q6PHN1|CCD57_MOUSE	Q6PHN1	922	0.997	ESDHRTHRSSSLASSSLQDIWRLLELGSSPS	S	L	Q	D	5	2	3	-0.347268	-0.582759	0.532101	-0.443624	0.116507	STYX	-0.465014	0.0532089	0.0683281	0.966397	CENTER
CCD57_964	sp|Q6PHN1|CCD57_MOUSE	Q6PHN1	964	1	CPAPSRPSCFQKVNRSPVPIQKAFAVKGLKM	S	P	V	P	5	2	3	-0.0589199	0.0692529	1.35309	0.904849	1.20665	STYX	0.00516653	0.94074	1.15486	0.0107295	NR
CCD60_319	sp|Q8C4J0|CCD60_MOUSE	Q8C4J0	319	0.996	RRTILVESEIQKKAPSILSLVKQIKSEYGWK	S	I	L	S	5	2	3	-0.388865	0.0419711	1.46121	0.467997	1.12892	STYX	-0.173447	0.44504	1.01937	0.024756	NR
CCD63_9 10	sp|Q8CDV6|CCD63_MOUSE	Q8CDV6	9 10	0.899	_______MKKVRRKGSSGLSELSEKAREQLA ______MKKVRRKGSSGLSELSEKAREQLAQ	S	S	G	L	4	2	2	-0.298485	-0.340954	0.624774	0.778412	NA	STYX	-0.31972	0.10834	0.701593	0.116678	CENTER
CCD66_316	sp|Q6NS45|CCD66_MOUSE	Q6NS45	316	0.993	KSQVHDQSKEARLLESPCSAIKQEQQRKWIE	S	P	C	S	5	2	3	0.259827	0.0733006	0.168767	0.12655	0.383456	STYX	0.166564	0.373772	0.226258	0.52762	CENTER
CCD66_747	sp|Q6NS45|CCD66_MOUSE	Q6NS45	747	0.999	VERNNPENLSQNRGISPLATSHRETESESRL	S	P	L	A	5	2	3	0.33208	0.491024	-0.00643785	0.250875	0.475845	STYX	0.411552	0.0917841	0.240094	0.514971	CENTER
CCD70_22	sp|Q9D9B0|CCD70_MOUSE	Q9D9B0	22	0.996	SKWMGLACLRSLVLPSPSIRQKKLIHKLQEE	S	P	S	I	4	2	2	-0.200545	-0.11732	0.15518	NA	0.567266	STYX	-0.158932	0.374498	0.361223	0.408228	CENTER
CCD73_1023	sp|Q8CDM4|CCD73_MOUSE	Q8CDM4	1023	0.999	SQTVKVTDSPDPLTFSPGNNDWQSLVMNRLT	S	P	G	N	5	2	3	-0.815063	-0.205086	0.333541	-0.0166025	0.492293	STYX	-0.510075	0.0819232	0.269744	0.458608	CENTER
CCD73_876	sp|Q8CDM4|CCD73_MOUSE	Q8CDM4	876	0.999	ADSVSTSARSAFDLPSPDKPEKTPGYIKFVP	S	P	D	K	5	2	3	0.387151	0.527109	0.433039	0.565921	0.546936	STYX	0.45713	0.0743721	0.515298	0.13518	CENTER
CCD81_206	sp|Q9D5W4|CCD81_MOUSE	Q9D5W4	206	1	DSVLSSRESYRKRPNSAMAFPRIEHKETENK	S	A	M	A	5	2	3	-0.0946789	-0.0306292	0.724079	0.860227	0.83883	STYX	-0.062654	0.743231	0.807712	0.0336027	CENTER
CCD81_222	sp|Q9D5W4|CCD81_MOUSE	Q9D5W4	222	0.999	AMAFPRIEHKETENKTPVEVVGEEGGENRPR	T	P	V	E	5	2	3	-0.022532	-0.237085	0.647499	1.03189	0.0881782	STYX	-0.129809	0.494031	0.589189	0.139833	CENTER
CCD81_297	sp|Q9D5W4|CCD81_MOUSE	Q9D5W4	297	0.988	RSGNGGKITACENLSSPGCQRNDNERPRTSP	S	P	G	C	5	2	3	0.260476	-0.107904	0.553405	0.744498	0.598913	STYX	0.076286	0.726949	0.632272	0.0770735	CENTER
CCD81_419	sp|Q9D5W4|CCD81_MOUSE	Q9D5W4	419	1	KPEFYKSFLFDKRPLSPEINAFKQEEYSQSL	S	P	E	I	5	2	3	-0.272572	-0.151704	1.36112	1.39132	1.97178	STYX	-0.212138	0.248025	1.57474	0.00495336	NR
CCD86_18	sp|Q9JJ89|CCD86_MOUSE	Q9JJ89	18	0.999	TPLRRSRRLEGLKPLSPENLPVPEVSRAKRA	S	P	E	N	5	2	3	-0.114446	0.130011	-0.516436	-0.85128	-0.784918	STYX	0.0077825	0.9471	-0.717545	0.0261124	CENTER
CCD86_194	sp|Q9JJ89|CCD86_MOUSE	Q9JJ89	194	0.985	LGLESPAGQTESSPESPQREQPSKLPPPQGE	S	P	Q	R	4	2	2	0.0765009	-0.044751	0.166448	-0.797836	NA	STYX	0.0158749	0.889139	-0.315694	0.429108	CENTER
CCD86_283	sp|Q9JJ89|CCD86_MOUSE	Q9JJ89	283	0.999	ETVTESLNLKKRVIASPQAPASKKLKEKEEL	S	P	Q	A	5	2	3	0.395471	0.443122	-0.202718	-0.159937	-0.531362	STYX	0.419297	0.0850148	-0.298006	0.234299	CENTER
CCD89_12	sp|Q9DA73|CCD89_MOUSE	Q9DA73	12	1	____MPQEEKTLRMDTPPPDEILGKQNENLQ	T	P	P	P	5	2	3	-0.374878	0.0420452	0.620868	0.725188	0.947577	STYX	-0.166416	0.457277	0.764544	0.0428256	CENTER
CCD92_194	sp|Q8VDN4|CCD92_MOUSE	Q8VDN4	194	0.995	DKLPETPRRRMKKSLSAPLHPEFEEVYRFGA	S	A	P	L	5	2	3	0.241413	0.727101	0.681506	0.459052	0.567622	STYX	0.484257	0.0937958	0.569393	0.104417	CENTER
CCD97_210	sp|Q9DBT3|CCD97_MOUSE	Q9DBT3	210	0.984	QEELNARTAAPQAPRSGSPGTPAYPLSDLLF	S	G	S	P	5	2	3	-0.093455	-0.20357	0.0212473	0.0580789	0.447887	STYX	-0.148513	0.409535	0.175738	0.668085	CENTER
CCD97_212	sp|Q9DBT3|CCD97_MOUSE	Q9DBT3	212	0.992	ELNARTAAPQAPRSGSPGTPAYPLSDLLFQS	S	P	G	T	5	2	3	0.0822778	-0.0549566	0.686589	0.207206	0.506951	STYX	0.0136606	0.900979	0.466916	0.185666	CENTER
CCDC6_237	sp|D3YZP9|CCDC6_MOUSE	D3YZP9	237	0.999	RILQEKLDQPVSAPPSPRDISMEIDSPENMM	S	P	R	D	5	2	3	-0.0889243	0.0862612	-0.401162	-0.440116	-0.350553	STYX	-0.00133153	0.979572	-0.397277	0.122601	CENTER
CCDC6_345	sp|D3YZP9|CCDC6_MOUSE	D3YZP9	345	0.99	FNEMSAQGLRPRTVSSPIPYTPSPSSSRPIS	S	P	I	P	4	2	2	-0.00897154	0.0822058	0.056606	NA	0.38781	STYX	0.0366172	0.79448	0.222208	0.624433	CENTER
CCDC6_410 411 412	sp|D3YZP9|CCDC6_MOUSE	D3YZP9	410 411 412	0.896	HMGASHGITRPSPRRSSSPDKFKRPTPPPSP MGASHGITRPSPRRSSSPDKFKRPTPPPSPN GASHGITRPSPRRSSSPDKFKRPTPPPSPNT	S	S	S	P	5	2	3	0.131415	0.16377	-0.534518	-0.428639	-0.413304	STYX	0.147592	0.390504	-0.45882	0.0878929	CENTER
CCDC6_412	sp|D3YZP9|CCDC6_MOUSE	D3YZP9	412	0.997	GASHGITRPSPRRSSSPDKFKRPTPPPSPNT	S	P	D	K	5	2	3	0.369612	-0.0343493	0.0952983	-0.375646	-0.63055	STYX	0.167632	0.462333	-0.303633	0.258468	CENTER
CCDC6_45	sp|D3YZP9|CCDC6_MOUSE	D3YZP9	45	0.998	GSGGGGGGKSGGIVISPFRLEELTNRLASLQ	S	P	F	R	5	2	3	-0.691392	0.26785	0.123614	-0.523666	-0.291422	STYX	-0.211771	0.637262	-0.230491	0.350182	CENTER
CCM2_393	sp|Q8K2Y9|CCM2_MOUSE	Q8K2Y9	393	0.99	LETIGVKDGRGIITDSFGRHRRALSTTSTST	S	F	G	R	5	2	3	-0.0705948	0.159443	-0.753493	-0.379814	-0.283982	STYX	0.0444244	0.79101	-0.47243	0.0954851	CENTER
CCM2_425	sp|Q8K2Y9|CCM2_MOUSE	Q8K2Y9	425	0.997	NGNRTTGSPDDRSAPSEGDEWDRMISDISSD	S	E	G	D	4	2	2	0.820514	0.247131	NA	-0.29364	-0.398722	STYX	0.533823	0.085977	-0.346181	0.256651	CENTER
CCNB2_397	sp|P30276|CCNB2_MOUSE	P30276	397	0.999	LNSKIIKDLASPLLGSP______________	S	P	_	_	5	2	3	-0.358008	0.6851	0.57076	0.367897	0.786896	STYX	0.163546	0.862615	0.575184	0.107719	CENTER
CCNB3_1058	sp|Q810T2|CCNB3_MOUSE	Q810T2	1058	0.999	EEEFFKSFLVFENKNSPNMSSNAFESRTDNS	S	P	N	M	5	2	3	-1.01474	-0.131611	0.24367	-0.559291	-0.41571	STYX	-0.573176	0.115731	-0.243777	0.344631	CENTER
CCNB3_223	sp|Q810T2|CCNB3_MOUSE	Q810T2	223	0.997	TDLKKSVIRKVTLTSSPLWLKNKHVVQEEKP	S	P	L	W	4	2	2	-0.706459	0.305468	NA	0.19673	-0.433719	STYX	-0.200496	0.67565	-0.118495	0.653415	CENTER
CCNB3_496	sp|Q810T2|CCNB3_MOUSE	Q810T2	496	0.999	DPPSQWPSALPKKHISPGELSKQKKQHVSPK	S	P	G	E	5	2	3	-0.535811	-0.071819	-0.0342392	0.091324	-0.660249	STYX	-0.303815	0.211902	-0.201055	0.445948	CENTER
CCND3_264	sp|P30282|CCND3_MOUSE	P30282	264	0.999	AALRESLREAAQTAPSPVPKAPRGSSSQGPS	S	P	V	P	5	2	3	-0.418279	0.275032	-0.953767	-0.98942	-1.62045	STYX	-0.0716237	0.787197	-1.18788	0.00662669	NR
CCNE2_21	sp|Q9Z238|CCNE2_MOUSE	Q9Z238	21	0.999	SRLQAKQHAQPNQPDSPQETQIIQAKKRKTA	S	P	Q	E	5	2	3	0.851075	0.307987	0.364565	0.0877437	0.260925	STYX	0.579531	0.068213	0.237745	0.500437	CENTER
CCNK_325	sp|O88874|CCNK_MOUSE	O88874	325	0.941	SAQQQQQQAQQPKKPSPQPSPPRQAKRAVVV	S	P	Q	P	5	2	3	0.463287	0.164471	0.456204	0.398793	-0.000918608	STYX	0.313879	0.170962	0.284693	0.429075	CENTER
CCNK_329	sp|O88874|CCNK_MOUSE	O88874	329	0.999	QQQQAQQPKKPSPQPSPPRQAKRAVVVSPKE	S	P	P	R	5	2	3	0.422109	0.584081	0.258964	0.167122	0.12599	STYX	0.503095	0.0632436	0.184025	0.614918	CENTER
CCNK_341	sp|O88874|CCNK_MOUSE	O88874	341	1	PQPSPPRQAKRAVVVSPKEENKATEPPPPPK	S	P	K	E	5	2	3	0.214455	0.594854	0.220787	0.107908	-0.132027	STYX	0.404654	0.11704	0.0655561	0.945608	CENTER
CCNL1_341 347 348	sp|Q52KE7|CCNL1_MOUSE	Q52KE7	341 347 348	0.877	LNLDGTPALSTLGGFSPASKPSSPREVKAEE PALSTLGGFSPASKPSSPREVKAEEKSPVSI ALSTLGGFSPASKPSSPREVKAEEKSPVSIN	S	P	A	S	5	2	3	-0.367861	-0.425072	-0.190787	0.0919483	0.169614	STYX	-0.396466	0.0660121	0.0235916	0.935227	CENTER
CCNL1_348	sp|Q52KE7|CCNL1_MOUSE	Q52KE7	348	0.986	ALSTLGGFSPASKPSSPREVKAEEKSPVSIN	S	P	R	E	5	2	3	-0.0850497	0.300381	0.0897594	-0.0309894	-0.055134	STYX	0.107666	0.630128	0.001212	0.868841	CENTER
CCNL1_358	sp|Q52KE7|CCNL1_MOUSE	Q52KE7	358	0.996	ASKPSSPREVKAEEKSPVSINVKTVKKEPED	S	P	V	S	5	2	3	-0.0477113	0.100411	-0.499868	-0.362628	-0.631663	STYX	0.0263497	0.846808	-0.498053	0.0741489	CENTER
CCNL1_380	sp|Q52KE7|CCNL1_MOUSE	Q52KE7	380	0.991	KTVKKEPEDRQQASKSPYNGVRKDSKRSRTS	S	P	Y	N	5	2	3	-0.104097	0.15798	-0.521525	-0.425739	-0.794909	STYX	0.0269417	0.872534	-0.580725	0.0506077	CENTER
CCNL2_328	sp|Q9JJA7|CCNL2_MOUSE	Q9JJA7	328	0.999	LLPGTAPGLDSAAGFSPAPKLESPKEGKGGK	S	P	A	P	5	2	3	0.151551	0.410151	-0.291621	-0.285676	-0.00455183	STYX	0.280851	0.196506	-0.19395	0.386429	CENTER
CCNL2_335	sp|Q9JJA7|CCNL2_MOUSE	Q9JJA7	335	1	GLDSAAGFSPAPKLESPKEGKGGKPSPPSGK	S	P	K	E	5	2	3	1.07218	0.317532	0.652258	0.226094	-0.508691	STYX	0.694854	0.0597582	0.12322	0.831075	CENTER
CCNL2_345	sp|Q9JJA7|CCNL2_MOUSE	Q9JJA7	345	0.998	APKLESPKEGKGGKPSPPSGKSAKRKMEGPK	S	P	P	S	5	2	3	1.07105	0.488795	0.088309	-0.00154615	-0.322447	STYX	0.779922	0.0388575	-0.0785613	0.65634	CENTER
CCNL2_366	sp|Q9JJA7|CCNL2_MOUSE	Q9JJA7	366	1	SAKRKMEGPKKAQGHSPVNGLLKGQESRSQS	S	P	V	N	5	2	3	0.121873	0.358761	0.111487	0.0809795	0.0429449	STYX	0.240317	0.24381	0.0784705	0.902701	CENTER
CCNY_21	sp|Q8BGU5|CCNY_MOUSE	Q8BGU5	21	0.997	SCCVSSSPKLRRNAHSRLESYRPDTDLSRED	S	R	L	E	5	2	3	-0.253933	-0.287369	0.0808656	-0.41556	-0.323999	STYX	-0.270651	0.152618	-0.219565	0.351977	CENTER
CCNY_25 26	sp|Q8BGU5|CCNY_MOUSE	Q8BGU5	25 26	0.893	SSSPKLRRNAHSRLESYRPDTDLSREDTGCN SSPKLRRNAHSRLESYRPDTDLSREDTGCNL	S	Y	R	P	4	2	2	-0.361537	-0.485158	-0.527156	NA	0.224954	STYX	-0.423348	0.0591048	-0.151101	0.615707	CENTER
CCNY_326	sp|Q8BGU5|CCNY_MOUSE	Q8BGU5	326	0.995	DKYKDLRKPMRKRSASADNLILPRWSPAIIS	S	A	D	N	5	2	3	-0.113656	0.0664407	-0.22124	-0.352736	-0.323679	STYX	-0.0236075	0.918557	-0.299218	0.214669	CENTER
CCNY_336	sp|Q8BGU5|CCNY_MOUSE	Q8BGU5	336	0.999	RKRSASADNLILPRWSPAIIS__________	S	P	A	I	5	2	3	-0.453214	0.0134456	0.206428	-0.288518	-0.715028	STYX	-0.219884	0.356963	-0.265706	0.33735	CENTER
CCSAP_222	sp|Q8QZT2|CCSAP_MOUSE	Q8QZT2	222	1	QVEKRKLAAQRQRAHSVDVEKNQRVKPASAE	S	V	D	V	5	2	3	0.256681	-0.217801	0.540408	0.319202	0.0610784	STYX	0.01944	0.961714	0.306896	0.389818	CENTER
CCZ1_264	sp|Q8C1Y8|CCZ1_MOUSE	Q8C1Y8	264	1	SLFPRHIEPELAGRDSPVRAEMPGNLQHYGR	S	P	V	R	5	2	3	0.293808	-0.00310161	-0.424805	-0.10859	0.265557	STYX	0.145353	0.469562	-0.0892795	0.64031	CENTER
CD003_19	sp|Q99M08|CD003_MOUSE	Q99M08	19	1	SQAASGTDGVRERRGSFEAGRRNQDEAPQSG	S	F	E	A	5	2	3	0.375876	-0.0664371	-0.496643	-0.634625	-0.4341	STYX	0.154719	0.520845	-0.521789	0.063531	CENTER
CD046_10 11	sp|Q3UUX7|CD046_MOUSE	Q3UUX7	10 11	0.897	______MADSEEFRASSPPPPPPSSPSSGAS _____MADSEEFRASSPPPPPPSSPSSGASS	S	S	P	P	4	2	2	0.151332	0.636514	0.147626	-0.157912	NA	STYX	0.393923	0.144862	-0.0051429	0.878192	CENTER
CD051_111	sp|Q9DAF8|CD051_MOUSE	Q9DAF8	111	0.988	SQEAADGKGRLPDIASPSRDSPLNIKHKVAH	S	P	S	R	4	2	2	-0.396913	0.390383	NA	0.241502	0.501133	STYX	-0.0032653	0.927137	0.371318	0.374126	CENTER
CD11B_234	sp|P24788|CD11B_MOUSE	P24788	234	1	REEYSDKGKVGHWSRSPLRPPRERFEMGDNR	S	P	L	R	5	2	3	0.425628	0.254112	0.0840544	0.299522	0.758219	STYX	0.33987	0.13138	0.380598	0.304692	CENTER
CD11B_270	sp|P24788|CD11B_MOUSE	P24788	270	0.998	EKVEERDLLSDLQDISDSERKTSSAESSSAE	S	D	S	E	5	2	3	-0.568718	-0.028977	0.283337	-0.0108615	0.384515	STYX	-0.298847	0.257692	0.218997	0.550711	CENTER
CD11B_47	sp|P24788|CD11B_MOUSE	P24788	47	1	IKRLKNSDDRDSKRDSLEEGELRDHRMEITI	S	L	E	E	5	2	3	0.499831	0.310882	0.314772	0.307828	0.308701	STYX	0.405357	0.0961123	0.310434	0.350013	CENTER
CD11B_578	sp|P24788|CD11B_MOUSE	P24788	578	0.998	GILKVGDFGLAREYGSPLKAYTPVVVTLWYR	S	P	L	K	5	2	3	0.219488	0.39749	0.370661	0.272217	1.02222	STYX	0.308489	0.156234	0.555033	0.145695	CENTER
CD11B_584	sp|P24788|CD11B_MOUSE	P24788	584	0.997	DFGLAREYGSPLKAYTPVVVTLWYRAPELLL	T	P	V	V	5	2	3	-0.615579	-0.00331745	0.478421	0.00331403	-0.0652262	STYX	-0.309448	0.275716	0.138836	0.77716	CENTER
CD11B_65	sp|P24788|CD11B_MOUSE	P24788	65	0.997	EGELRDHRMEITIRNSPYRREDSMEDRGEED	S	P	Y	R	5	2	3	-0.763584	0.279449	0.142525	-0.164031	0.136107	STYX	-0.242067	0.633571	0.0382003	0.978004	CENTER
CD11B_72	sp|P24788|CD11B_MOUSE	P24788	72	1	RMEITIRNSPYRREDSMEDRGEEDDSLAIKP	S	M	E	D	5	2	3	1.47654	-0.262759	-0.568433	0.0939887	1.09771	STYX	0.606893	0.632449	0.207756	0.805498	CENTER
CD11B_740	sp|P24788|CD11B_MOUSE	P24788	740	0.989	PTWPAKSEQQRVKRGTSPRPPEGGLGYSQLG	T	S	P	R	5	2	3	0.359217	0.0746062	0.144896	0.392374	0.221974	STYX	0.216912	0.299063	0.253081	0.469089	CENTER
CD11B_740 741	sp|P24788|CD11B_MOUSE	P24788	740 741	0.899	PTWPAKSEQQRVKRGTSPRPPEGGLGYSQLG TWPAKSEQQRVKRGTSPRPPEGGLGYSQLGD	T	S	P	R	5	2	3	0.411925	0.184802	0.20143	0.226786	0.255246	STYX	0.298364	0.172055	0.227821	0.510074	CENTER
CD11B_741	sp|P24788|CD11B_MOUSE	P24788	741	0.994	TWPAKSEQQRVKRGTSPRPPEGGLGYSQLGD	S	P	R	P	5	2	3	0.354111	0.234756	0.0872834	0.331858	0.542187	STYX	0.294434	0.163184	0.320443	0.3654	CENTER
CD158_62	sp|Q8CDI6|CD158_MOUSE	Q8CDI6	62	0.998	LTQMPFFPKYEVELDSPRKSTPYPGKEHIER	S	P	R	K	5	2	3	0.691477	0.601493	0.288432	0.808715	0.413303	STYX	0.646485	0.0407567	0.503483	0.158813	CENTER
CD158_929	sp|Q8CDI6|CD158_MOUSE	Q8CDI6	929	0.996	PAMALSKTEEDGRTPSLGALEDRVRDCITES	S	L	G	A	5	2	3	-0.350075	-0.0782752	0.319939	-0.0154348	0.380464	STYX	-0.214175	0.284435	0.228323	0.530367	CENTER
CD2AP_404	sp|Q9JLQ0|CD2AP_MOUSE	Q9JLQ0	404	0.997	PKKPTAPTKASNLLRSPGAVYPKRPEKPVPP	S	P	G	A	5	2	3	-0.362502	0.0765244	-0.778624	-1.33369	-1.0363	STYX	-0.142989	0.531127	-1.04954	0.00857469	NR
CD2AP_510	sp|Q9JLQ0|CD2AP_MOUSE	Q9JLQ0	510	0.97	KMPGRRLPGRFNGGHSPTQSPEKTLKLPKED	S	P	T	Q	5	2	3	-0.309402	0.00804444	-0.971569	-0.993902	-1.63541	STYX	-0.150679	0.458435	-1.20029	0.0064504	NR
CD2B2_244	sp|Q9CWK3|CD2B2_MOUSE	Q9CWK3	244	0.998	RLKGLGCRAQGSHDPTPPPSLDMFAEEVAEG	T	P	P	P	5	2	3	-0.834185	-0.376419	0.703382	-0.299982	0.111488	STYX	-0.605302	0.0383078	0.171629	0.757282	CENTER
CD2B2_49	sp|Q9CWK3|CD2B2_MOUSE	Q9CWK3	49	0.999	AGGPGSRFKGKHSLDSDEEDDDEEGSSKYDI	S	D	E	E	5	2	3	0.700758	-0.179097	0.0817526	0.452688	0.787215	STYX	0.260831	0.586511	0.440552	0.234428	CENTER
CD34_343	sp|Q64314|CD34_MOUSE	Q64314	343	0.999	TENGGGQGYSSGPGASPETQGKANVTRGAQE	S	P	E	T	5	2	3	-0.306631	-0.386103	-0.571021	-0.909243	-0.415294	STYX	-0.346367	0.0904695	-0.631853	0.0418661	CENTER
CDA7L_136	sp|Q922M5|CDA7L_MOUSE	Q922M5	136	0.992	EEEAAPRRGRSTRRSSFGLRVAFQFPTKKLA	S	F	G	L	5	2	3	-0.144537	0.0926345	-0.223663	-1.20094	-1.75831	STYX	-0.0259514	0.901336	-1.06097	0.024463	NR
CDC16_560	sp|Q8R349|CDC16_MOUSE	Q8R349	560	1	YDFDVHTMKTLKNIISPPWDFRDFEVEKQNT	S	P	P	W	5	2	3	-0.526847	0.134421	-0.188575	-0.26274	0.117619	STYX	-0.196213	0.517853	-0.111232	0.565607	CENTER
CDC20_70	sp|Q9JJ66|CDC20_MOUSE	Q9JJ66	70	0.989	TPGRTPGKSSSKVQTTPSKPGGDRFIPQRSA	T	P	S	K	5	2	3	1.43467	1.29117	-0.259544	0.140209	-0.336449	STYX	1.36292	0.0190306	-0.151928	0.476894	NR
CDC23_582	sp|Q8BGZ4|CDC23_MOUSE	Q8BGZ4	582	0.996	TPGTFFLPASLSANNTPTRRVSPLNLSSVTP	T	P	T	R	5	2	3	-0.0265216	-0.302775	0.179051	0.00172441	0.0702465	STYX	-0.164649	0.407429	0.0836739	0.888023	CENTER
CDC23_588	sp|Q8BGZ4|CDC23_MOUSE	Q8BGZ4	588	0.999	LPASLSANNTPTRRVSPLNLSSVTP______	S	P	L	N	5	2	3	0.104857	0.0381352	-0.194422	-0.468848	-0.178773	STYX	0.0714959	0.644592	-0.280681	0.248896	CENTER
CDC23_596	sp|Q8BGZ4|CDC23_MOUSE	Q8BGZ4	596	0.999	NTPTRRVSPLNLSSVTP______________	T	P	_	_	5	2	3	-0.241508	0.675937	0.350362	-0.017583	0.762072	STYX	0.217214	0.70259	0.36495	0.341361	CENTER
CDCA2_296	sp|Q14B71|CDCA2_MOUSE	Q14B71	296	0.995	ATATRSPETPMCGSSSPSAKTTATRSPATPV	S	P	S	A	5	2	3	0.287183	0.696017	0.0993963	0.422479	0.190747	STYX	0.4916	0.0813317	0.237541	0.508896	CENTER
CDCA3_67	sp|Q99M54|CDCA3_MOUSE	Q99M54	67	0.979	EQLNGLKQAQDPDPRSPTLGIARTPMKISGP	S	P	T	L	5	2	3	0.734545	0.464896	0.0303445	-0.391636	-0.254407	STYX	0.599721	0.049484	-0.205233	0.370913	CENTER
CDCA5_222	sp|Q9CPY3|CDCA5_MOUSE	Q9CPY3	222	0.999	DSTKDLVPARTLPGISPPVVKEKRKKKVPEI	S	P	P	V	5	2	3	0.187324	0.581972	0.358571	0.54089	0.45412	STYX	0.384648	0.132072	0.451194	0.184449	CENTER
CDHR5_753	sp|Q8VHF2|CDHR5_MOUSE	Q8VHF2	753	0.997	QPKASGSPKTVQAGDSPSAVRSILTKERRPE	S	P	S	A	5	2	3	0.378522	0.239989	-0.327098	-1.0091	-0.630214	STYX	0.309256	0.150978	-0.655469	0.0428323	CENTER
CDIP1_27	sp|Q9DB75|CDIP1_MOUSE	Q9DB75	27	0.998	GPTAPLLEEKSGAPLTPGRTSPAVMQPPPGM	T	P	G	R	4	2	2	0.792895	-0.038367	-0.242822	-0.313306	NA	STYX	0.377264	0.320338	-0.278064	0.337014	CENTER
CDK1_15	sp|P11440|CDK1_MOUSE,sp|P97377|CDK2_MOUSE,sp|Q80YP0|CDK3_MOUSE	P11440	15	0.997	_MEDYIKIEKIGEGTYGVVYKGRHRVTGQIV	Y	G	V	V	5	2	3	0.177394	0.628561	0.312103	0.227559	0.240709	STYX	0.402978	0.13072	0.260124	0.442785	CENTER
CDK10_196	sp|Q3UMM4|CDK10_MOUSE	Q3UMM4	196	0.999	DFGLARAYGVPVKPMTPKVVTLWYRAPELLL	T	P	K	V	5	2	3	0.358746	0.869307	0.136181	-0.0778455	0.707967	STYX	0.614027	0.0576229	0.255434	0.543336	CENTER
CDK12_1079	sp|Q14AX6|CDK12_MOUSE	Q14AX6	1079	1	KETTSGTTAEPVKNNSPAPPQPAPVKAEPGP	S	P	A	P	5	2	3	0.417259	0.317338	0.133625	0.141268	0.449542	STYX	0.367298	0.109633	0.241478	0.503192	CENTER
CDK12_1240	sp|Q14AX6|CDK12_MOUSE	Q14AX6	1240	0.996	ENTNDKNSGPQGPRRTPTMPQEEAAACPPHI	T	P	T	M	5	2	3	0.129933	-0.0750251	-0.195418	0.437582	0.288579	STYX	0.0274537	0.855013	0.176915	0.671381	CENTER
CDK12_1365	sp|Q14AX6|CDK12_MOUSE	Q14AX6	1365	0.999	DERSSGPALTESLVQTPVKNRTFSGSVSHLG	T	P	V	K	5	2	3	0.410037	0.13147	0.138998	0.458401	-1.18066	STYX	0.270754	0.212479	-0.194419	0.718555	CENTER
CDK12_292	sp|Q14AX6|CDK12_MOUSE,sp|Q69ZA1|CDK13_MOUSE	Q14AX6	292	0.991	PYKEPSAYQSSTRSPSPYSRRQRSVSPYSRR	S	P	Y	S	5	2	3	0.0341856	0.775737	0.748481	0.697298	0.0908128	STYX	0.404961	0.229589	0.512197	0.170831	CENTER
CDK12_331	sp|Q14AX6|CDK12_MOUSE	Q14AX6	331	0.988	GSYSGRSPSPYGRRRSSSPFLSKRSLSRSPL	S	S	S	P	5	2	3	-0.396669	0.236936	0.231321	-0.0961169	0.897278	STYX	-0.0798665	0.753381	0.344161	0.419608	CENTER
CDK12_331 332 333	sp|Q14AX6|CDK12_MOUSE	Q14AX6	331 332 333	0.897	GSYSGRSPSPYGRRRSSSPFLSKRSLSRSPL SYSGRSPSPYGRRRSSSPFLSKRSLSRSPLP YSGRSPSPYGRRRSSSPFLSKRSLSRSPLPS	S	S	S	P	5	2	3	0.0135281	0.158491	-0.0520088	0.370448	0.179065	STYX	0.0860097	0.605392	0.165835	0.681114	CENTER
CDK12_421 422	sp|Q14AX6|CDK12_MOUSE	Q14AX6	421 422	0.874	AAAAAAAKMDGKESKSSPIILPKKEKLEVKE AAAAAAKMDGKESKSSPIILPKKEKLEVKES	S	S	P	I	5	2	3	-0.0527408	0.664412	0.342427	-0.0960927	0.19612	STYX	0.305836	0.367996	0.147485	0.726906	CENTER
CDK12_422	sp|Q14AX6|CDK12_MOUSE	Q14AX6	422	0.99	AAAAAAKMDGKESKSSPIILPKKEKLEVKES	S	P	I	I	5	2	3	0.145924	0.489627	0.499219	0.387896	0.478782	STYX	0.317776	0.176408	0.455299	0.178345	CENTER
CDK12_677	sp|Q14AX6|CDK12_MOUSE	Q14AX6	677	0.998	LTDLPLPPELPGGDPSPPDSPEPKAITPPQQ	S	P	P	D	5	2	3	-0.49184	-0.178287	0.037498	-0.17144	0.0880091	STYX	-0.335064	0.128442	-0.0153111	0.823667	CENTER
CDK12_688	sp|Q14AX6|CDK12_MOUSE	Q14AX6	688	0.999	GGDPSPPDSPEPKAITPPQQPYKKRPKICCP	T	P	P	Q	5	2	3	0.121889	0.417718	0.431706	0.0848104	0.119158	STYX	0.269804	0.218526	0.211892	0.571877	CENTER
CDK13_1147	sp|Q69ZA1|CDK13_MOUSE	Q69ZA1	1147	0.996	PAGILATGEKQTDPSTPQQESSKSLGGVQPS	T	P	Q	Q	5	2	3	0.377209	0.290632	-0.378263	-0.334039	-0.126307	STYX	0.333921	0.127849	-0.279536	0.245309	CENTER
CDK13_1245	sp|Q69ZA1|CDK13_MOUSE	Q69ZA1	1245	1	QDDLIQHQDRRILELTPEPDRPRILPPDQRP	T	P	E	P	5	2	3	0.0390783	0.728609	-0.0454916	-0.253526	-0.241264	STYX	0.383844	0.230682	-0.180094	0.407178	CENTER
CDK13_326	sp|Q69ZA1|CDK13_MOUSE	Q69ZA1	326	0.998	RRRQRSLSPLGGRDESPVSHRASQSLRSRKS	S	P	V	S	5	2	3	1.28268	-0.059993	0.313061	0.568627	0.649119	STYX	0.611341	0.311217	0.510269	0.143547	CENTER
CDK13_384	sp|Q69ZA1|CDK13_MOUSE	Q69ZA1	384	0.996	PSYSRHSSYERGGDVSPSPYSSSSWRRSRSP	S	P	S	P	5	2	3	0.0779486	0.39984	-0.183582	0.0512067	-0.256194	STYX	0.238894	0.273738	-0.129523	0.520191	CENTER
CDK13_437 438 440	sp|Q69ZA1|CDK13_MOUSE	Q69ZA1	437 438 440	0.877	RSRSRHRLSRSRSRHSSISPSTLTLKSSLAA SRSRHRLSRSRSRHSSISPSTLTLKSSLAAE SRHRLSRSRSRHSSISPSTLTLKSSLAAELN	S	S	I	S	4	2	2	0.0809142	0.148793	NA	-0.157228	-0.597275	STYX	0.114854	0.489917	-0.377252	0.255743	CENTER
CDK13_526	sp|Q69ZA1|CDK13_MOUSE	Q69ZA1	526	0.997	NHVKEVKKLKTEHAPSPSSGGTVKSDKAKTK	S	P	S	S	5	2	3	0.221958	0.0242607	-0.166926	0.150296	-0.141293	STYX	0.123109	0.496878	-0.0526412	0.716399	CENTER
CDK13_588	sp|Q69ZA1|CDK13_MOUSE	Q69ZA1	588	0.99	TKEEPVSTKEKSKPLTPSTGAKEKEQHVALV	T	P	S	T	5	2	3	0.78855	0.514944	-0.0848246	-0.24785	-0.307274	STYX	0.651747	0.042711	-0.213316	0.345938	CENTER
CDK13_662	sp|Q69ZA1|CDK13_MOUSE	Q69ZA1	662	0.909	ADLPLPPELPGGDDLSKSPEEKKTAAQLHSK	S	K	S	P	5	2	3	-0.338473	-0.248851	0.144654	0.00508499	0.242301	STYX	-0.293662	0.131726	0.13068	0.757731	CENTER
CDK13_664	sp|Q69ZA1|CDK13_MOUSE	Q69ZA1	664	0.978	LPLPPELPGGDDLSKSPEEKKTAAQLHSKRR	S	P	E	E	5	2	3	-0.400375	-0.0613498	-0.267758	-0.136228	-0.102787	STYX	-0.230862	0.276957	-0.168924	0.430339	CENTER
CDK16_110	sp|Q04735|CDK16_MOUSE	Q04735	110	0.995	SPVRVRMRNHPPRKISTEDINKRLSLPADIR	S	T	E	D	5	2	3	-0.0881725	-0.246654	-0.368917	-0.569294	-0.502094	STYX	-0.167413	0.360913	-0.480102	0.0800236	CENTER
CDK16_110 111	sp|Q04735|CDK16_MOUSE	Q04735	110 111	0.857	SPVRVRMRNHPPRKISTEDINKRLSLPADIR PVRVRMRNHPPRKISTEDINKRLSLPADIRL	S	T	E	D	5	2	3	-0.270746	-0.187617	-0.687337	-0.580479	-0.537798	STYX	-0.229182	0.214468	-0.601871	0.0415306	CENTER
CDK16_12	sp|Q04735|CDK16_MOUSE	Q04735	12	0.991	____MDRMKKIKRQLSMTLRGGRGIDKTNGV	S	M	T	L	5	2	3	-0.689553	0.143795	0.314256	-0.26697	0.992742	STYX	-0.272879	0.474763	0.346676	0.460001	CENTER
CDK16_78	sp|Q04735|CDK16_MOUSE	Q04735	78	0.999	LSSAPEIVHEDMKMGSDGESDQASATSSDEV	S	D	G	E	4	2	2	-0.20136	-0.116824	0.071442	0.349735	NA	STYX	-0.159092	0.374317	0.210588	0.642159	CENTER
CDK16_95	sp|Q04735|CDK16_MOUSE	Q04735	95	0.998	GESDQASATSSDEVQSPVRVRMRNHPPRKIS	S	P	V	R	4	2	2	0.260443	-0.629999	0.112017	0.516324	NA	STYX	-0.184778	0.646935	0.31417	0.474515	CENTER
CDK17_137	sp|Q8K0D0|CDK17_MOUSE	Q8K0D0	137	1	SPTGVCLRNRIHRRISMEDLNKRLSLPADIR	S	M	E	D	5	2	3	0.0657371	0.106743	-0.645311	-0.968277	-0.727205	STYX	0.0862399	0.586123	-0.780264	0.0196249	CENTER
CDK17_165	sp|Q8K0D0|CDK17_MOUSE	Q8K0D0	165	0.994	DIRIPDGYLEKLQISSPPFDQPMSRRSRRAS	S	P	P	F	5	2	3	-0.0730895	0.14463	0.203654	-0.166774	0.123508	STYX	0.0357703	0.823258	0.0534627	0.979887	CENTER
CDK17_180	sp|Q8K0D0|CDK17_MOUSE	Q8K0D0	180	0.996	SPPFDQPMSRRSRRASLSEIGFGKMETYIKL	S	L	S	E	5	2	3	-0.131232	-0.221386	-0.809462	-1.72908	-1.34338	STYX	-0.176309	0.326293	-1.29397	0.00617169	NR
CDK18_75	sp|Q04899|CDK18_MOUSE	Q04899	75	1	QNQRRFSMEDLNKRLSLPMDIRLPQEFLQKL	S	L	P	M	5	2	3	-0.214815	0.145047	-0.961286	-0.0231521	-0.380254	STYX	-0.0348836	0.868103	-0.454897	0.147593	CENTER
CDK5_17	sp|P49615|CDK5_MOUSE	P49615	17	0.998	QKYEKLEKIGEGTYGTVFKAKNRETHEIVAL	T	V	F	K	5	2	3	-0.423407	0.0293138	-1.08101	-1.47214	-1.36377	STYX	-0.197047	0.398881	-1.30564	0.00467894	NR
CDK7_164	sp|Q03147|CDK7_MOUSE	Q03147	164	0.997	GVLKLADFGLAKSFGSPNRAYTHQVVTRWYR	S	P	N	R	5	2	3	0.114435	0.667494	0.347527	0.42031	0.734807	STYX	0.390965	0.167056	0.500881	0.153852	CENTER
CDK9_186	sp|Q99J95|CDK9_MOUSE	Q99J95	186	0.946	ARAFSLAKNSQPNRYTNRVVTLWYRPPELLL	T	N	R	V	4	2	2	0.477972	-0.297059	-1.25649	-1.10424	NA	STYX	0.0904566	0.880697	-1.18037	0.0234174	NR
CDK9_347	sp|Q99J95|CDK9_MOUSE	Q99J95	347	0.998	LTSMFEYLAPPRRKGSQITQQSTNQSRNPAT	S	Q	I	T	4	2	2	-0.203234	0.368871	-0.37069	-0.30394	NA	STYQ	0.0828182	0.805524	-0.337315	0.2662	CENTER
CDKL3_160	sp|Q8BLF2|CDKL3_MOUSE	Q8BLF2	160	0.997	GFARTLAAPGDVYTDYVATRWYRAPELVLKD	Y	V	A	T	5	2	3	-0.583284	0.0402299	1.89132	0.660178	2.22545	STYX	-0.271527	0.347467	1.59232	0.0101446	NR
CDKL3_507 508	sp|Q8BLF2|CDKL3_MOUSE	Q8BLF2	507 508	0.89	EKGAFNERTGQNDQISSGNKRKLNFPKCDRK KGAFNERTGQNDQISSGNKRKLNFPKCDRKE	S	S	G	N	4	2	2	0.213389	-0.0447042	1.14733	1.45634	NA	STYX	0.0843426	0.646693	1.30184	0.0282671	NR
CDKL5_306	sp|Q3UTQ8|CDKL5_MOUSE	Q3UTQ8	306	0.996	CLNHPTFQTQRLLDRSPSRSTKRKPYHVESS	S	P	S	R	5	2	3	-0.218493	-0.0919736	0.33118	0.139678	0.0854308	STYX	-0.155233	0.392433	0.185429	0.620183	CENTER
CDKL5_407	sp|Q3UTQ8|CDKL5_MOUSE	Q3UTQ8	407	0.999	SSSKDLTNNNIPHLLSPKEAKSKTEFDFNID	S	P	K	E	5	2	3	-0.235728	-0.265169	0.392784	0.255626	-0.0347877	STYX	-0.250448	0.178106	0.204541	0.588081	CENTER
CDKL5_529	sp|Q3UTQ8|CDKL5_MOUSE	Q3UTQ8	529	0.992	SRYFPSSCLDLNSPTSPTPTRHTDTRTLLSP	S	P	T	P	4	2	2	-0.0742893	0.0619237	0.0931195	NA	0.062184	STYX	-0.0061828	1	0.0776518	0.921413	CENTER
CDKL5_543	sp|Q3UTQ8|CDKL5_MOUSE	Q3UTQ8	543	0.988	TSPTPTRHTDTRTLLSPSGRNNRNEGTLDSR	S	P	S	G	5	2	3	-0.237251	-0.129317	1.23375	0.901429	0.662776	STYX	-0.183284	0.311002	0.932652	0.0237964	NR
CDKL5_720	sp|Q3UTQ8|CDKL5_MOUSE	Q3UTQ8	720	0.996	NDPVPRRVGSFYRVPSPRPDNSFHENNVSTR	S	P	R	P	4	2	2	-0.439203	0.289326	NA	0.15889	-0.237267	STYX	-0.0749385	0.787977	-0.0391886	0.798718	CENTER
CDN1B_10	sp|P46414|CDN1B_MOUSE	P46414	10	0.997	______MSNVRVSNGSPSLERMDARQAEHPK	S	P	S	L	5	2	3	0.0703915	0.0816648	-0.392598	-0.73955	-0.624766	STYX	0.0760282	0.623903	-0.585638	0.0485756	CENTER
CDN1B_178	sp|P46414|CDN1B_MOUSE	P46414	178	0.998	QNKRANRTEENVSDGSPNAGTVEQTPKKPGL	S	P	N	A	5	2	3	-0.116423	-0.126544	-0.303066	-0.36965	0.430794	STYX	-0.121483	0.489988	-0.0806408	0.630958	CENTER
CDR2_310	sp|P97817|CDR2_MOUSE	P97817	310	0.995	LAAPEAPRKPLKRSSSETALSSLAGDDIVKD	S	E	T	A	4	2	2	0.152155	0.116392	NA	0.958544	0.406478	STYX	0.134274	0.427728	0.682511	0.144517	CENTER
CDR2L_154	sp|A2A6T1|CDR2L_MOUSE	A2A6T1	154	0.999	LEQLRIRREKRERRRTIHTFPCLKELCTSSR	T	I	H	T	5	2	3	-0.341826	-0.23816	-0.441888	-0.65621	-0.506905	STYX	-0.289993	0.137055	-0.535001	0.0594969	CENTER
CDR2L_157	sp|A2A6T1|CDR2L_MOUSE	A2A6T1	157	0.998	LRIRREKRERRRTIHTFPCLKELCTSSRCED	T	F	P	C	5	2	3	0.152849	0.26519	-0.413181	-0.16124	-0.469658	STYX	0.20902	0.270299	-0.348026	0.172105	CENTER
CDR2L_178 179 180	sp|A2A6T1|CDR2L_MOUSE	A2A6T1	178 179 180	0.885	ELCTSSRCEDAFRLHSSSLELGPRPLEQENE LCTSSRCEDAFRLHSSSLELGPRPLEQENER CTSSRCEDAFRLHSSSLELGPRPLEQENERL	S	S	S	L	5	2	3	-0.477303	-0.216911	-0.39588	-0.684228	-0.473869	STYX	-0.347107	0.108885	-0.517993	0.0665932	CENTER
CDR2L_179	sp|A2A6T1|CDR2L_MOUSE	A2A6T1	179	0.993	LCTSSRCEDAFRLHSSSLELGPRPLEQENER	S	S	L	E	5	2	3	-0.318984	0.0742283	-0.222328	-0.36789	-0.351563	STYX	-0.122378	0.572953	-0.313927	0.199244	CENTER
CDR2L_393	sp|A2A6T1|CDR2L_MOUSE	A2A6T1	393	0.998	GAGVRHAGVQTSRPISRDSSWRDLLGGEESP	S	R	D	S	5	2	3	0.115067	0.194257	-0.561421	-0.565602	-0.605646	STYX	0.154662	0.379605	-0.577557	0.0464898	CENTER
CDS1_35 36 37	sp|P98191|CDS1_MOUSE	P98191	35 36 37	0.893	PPREGEAAGGDHETESTSDKETDIDDRYGDL PREGEAAGGDHETESTSDKETDIDDRYGDLD REGEAAGGDHETESTSDKETDIDDRYGDLDA	S	T	S	D	4	2	2	0.342343	-0.226221	1.24876	0.990262	NA	STYX	0.0580611	0.87688	1.11951	0.038365	NR
CDS2_32	sp|Q99L43|CDS2_MOUSE	Q99L43	32	0.996	DKESESEAKLDGETASDSESRAETAPLPTSV	S	D	S	E	5	2	3	0.0402293	-0.176488	-0.620329	-0.634604	0.0613806	STYX	-0.0681293	0.724753	-0.397851	0.169036	CENTER
CDV3_51	sp|Q4VAA2|CDV3_MOUSE	Q4VAA2	51	0.998	GGSSAAAGSRPGDGGSLGSGARSGDGGSLGS	S	L	G	S	4	2	2	-0.224767	-0.0464047	-0.0183506	-0.568339	NA	STYX	-0.135586	0.466181	-0.293345	0.368156	CENTER
CDV3_66	sp|Q4VAA2|CDV3_MOUSE	Q4VAA2	66	0.996	SLGSGARSGDGGSLGSGSRSGDGGSSGSGAR	S	G	S	R	4	2	2	-0.134581	0.144465	0.297283	NA	0.0864534	STYX	0.00494225	0.968353	0.191868	0.669658	CENTER
CDV3_8	sp|Q4VAA2|CDV3_MOUSE	Q4VAA2	8	1	________MAETEERSLDNFFAKRDKKKKKE	S	L	D	N	5	2	3	-0.303431	0.128016	0.374274	0.0954094	1.20795	STYX	-0.0877075	0.695007	0.559212	0.188603	CENTER
CDYL_116	sp|Q9WTK2|CDYL_MOUSE	Q9WTK2	116	1	IHDFNRRHNERQKEGSLARASRASPSNARKQ	S	L	A	R	4	2	2	0.530995	-0.602814	1.70104	1.09885	NA	STYX	-0.0359096	0.890918	1.39995	0.0272937	NR
CDYL_196	sp|Q9WTK2|CDYL_MOUSE	Q9WTK2	196	1	NMDLAKSGIKILVPKSPVKGRTSVDGFQGES	S	P	V	K	5	2	3	-0.0430783	0.197877	-0.491139	-0.665636	-0.730178	STYX	0.0773991	0.665315	-0.628984	0.0373732	CENTER
CDYL2_111	sp|Q9D5D8|CDYL2_MOUSE	Q9D5D8	111	0.998	PGKSKPSSHKRKRVNSPLSRPKKGSSGKAPD	S	P	L	S	5	2	3	0.320111	0.510749	-0.792111	-0.316124	-0.74241	STYX	0.41543	0.0916758	-0.616882	0.0463458	CENTER
CE104_707	sp|Q80V31|CE104_MOUSE	Q80V31	707	1	AEKQKKEEMKALQGQSGELRETQAGVQEKES	S	G	E	L	5	2	3	-0.208668	-0.10414	0.670377	0.370855	0.198903	STYX	-0.156404	0.385	0.413378	0.23934	CENTER
CE120_368	sp|Q7TSG1|CE120_MOUSE	Q7TSG1	368	1	TQNGHEAEHSQKRVLTPIKEKTLTGPKSPRE	T	P	I	K	5	2	3	0.350493	0.641764	0.378661	0.32401	0.644277	STYX	0.496129	0.0708243	0.448983	0.191775	CENTER
CE120_380	sp|Q7TSG1|CE120_MOUSE	Q7TSG1	380	0.999	RVLTPIKEKTLTGPKSPRESPAPPPPPNQTP	S	P	R	E	5	2	3	0.452245	0.383686	0.418349	0.64602	0.267463	STYX	0.417965	0.0854437	0.443944	0.199473	CENTER
CE152_1283	sp|A2AUM9|CE152_MOUSE	A2AUM9	1283	0.998	LEALRALCRTPPRSLSAGAAESAGPSCSRQA	S	A	G	A	4	2	2	0.579999	0.05218	0.15915	NA	0.436134	STYX	0.31609	0.243355	0.297642	0.484897	CENTER
CE162_899	sp|Q6ZQ06|CE162_MOUSE	Q6ZQ06	899	0.988	EKLRLEIEKLKTESGSPATQQRLRSKERALD	S	P	A	T	5	2	3	2.15531	0.306285	0.402483	0.474219	-0.434655	STYX	1.2308	0.0535285	0.147349	0.751951	NR
CE164_1357	sp|Q5DU05|CE164_MOUSE	Q5DU05	1357	0.998	KWRKYFPSGIPLLSGSPPPPENKLGYVSVSE	S	P	P	P	5	2	3	-0.630046	-0.0088935	0.416031	-0.0200752	0.181003	STYX	-0.31947	0.26597	0.19232	0.619998	CENTER
CE164_234	sp|Q5DU05|CE164_MOUSE	Q5DU05	234	0.993	TNEEDEEESDNQSVRSSSELLKNLHLDLGAL	S	S	S	E	4	2	2	-0.0577825	0.273664	NA	0.413036	1.23039	STYX	0.107941	0.596541	0.821713	0.112909	CENTER
CE164_234 235 236	sp|Q5DU05|CE164_MOUSE	Q5DU05	234 235 236	0.899	TNEEDEEESDNQSVRSSSELLKNLHLDLGAL NEEDEEESDNQSVRSSSELLKNLHLDLGALG EEDEEESDNQSVRSSSELLKNLHLDLGALGG	S	S	S	E	5	2	3	-0.109063	-0.117027	-0.312427	-0.563456	-0.863322	STYX	-0.113045	0.523626	-0.579735	0.0564706	CENTER
CE164_505	sp|Q5DU05|CE164_MOUSE	Q5DU05	505	0.998	PEWKEAEGPGKDSVASPAPLSLLQREQVLSP	S	P	A	P	5	2	3	0.358539	0.173125	0.443299	0.292376	0.576747	STYX	0.265832	0.200157	0.437474	0.200532	CENTER
CE170_1102	sp|Q6A065|CE170_MOUSE	Q6A065	1102	0.978	PTRTSLLRRARLGEASDSELADADKASVASE	S	D	S	E	5	2	3	-0.0439148	-0.123422	0.446431	1.74082	1.8304	STYX	-0.0836682	0.647744	1.33922	0.0176609	NR
CE170_1135	sp|Q6A065|CE170_MOUSE	Q6A065	1135	0.983	TTSSTSKPPTGRRTISRIDLLAQPRRTRLGS	S	R	I	D	4	2	2	-0.310449	-0.177336	0.605878	NA	-0.31313	STYX	-0.243893	0.197913	0.146374	0.862828	CENTER
CE170_1155	sp|Q6A065|CE170_MOUSE	Q6A065	1155	0.995	LAQPRRTRLGSLSARSDSEATISRSSASART	S	D	S	E	5	2	3	0.220706	-0.253179	0.7038	0.705435	0.419723	STYX	-0.0162364	0.919986	0.609653	0.0881737	CENTER
CE170_1188	sp|Q6A065|CE170_MOUSE	Q6A065	1188	0.998	AVIRSGARLVPSDKLSPRTRANSISRLSDSK	S	P	R	T	5	2	3	-0.00750221	0.152627	0.686747	0.529567	0.366447	STYX	0.0725624	0.657808	0.527587	0.130948	CENTER
CE170_1200	sp|Q6A065|CE170_MOUSE	Q6A065	1200	0.978	DKLSPRTRANSISRLSDSKVKSMSSTHGSPS	S	D	S	K	4	2	2	0.130847	0.241032	NA	0.328529	0.149748	STYX	0.185939	0.313157	0.239138	0.576134	CENTER
CE170_1249 1250	sp|Q6A065|CE170_MOUSE	Q6A065	1249 1250	0.851	EFGSNRNSPKHTRLRTSPALKTTRMQSTGSA FGSNRNSPKHTRLRTSPALKTTRMQSTGSAM	T	S	P	A	4	2	2	-0.0109738	0.708997	NA	0.576361	0.766712	STYX	0.349012	0.296972	0.671536	0.130673	CENTER
CE170_1529	sp|Q6A065|CE170_MOUSE	Q6A065	1529	0.996	PSPPKQKSSPVNNHSSPSQTPALCPPETRAL	S	P	S	Q	5	2	3	0.133467	-0.000249861	0.195212	0.43665	0.735823	STYX	0.0666084	0.674992	0.455895	0.201155	CENTER
CE170_358	sp|Q6A065|CE170_MOUSE	Q6A065	358	0.999	QMVWERTEEDSKSIKSDVPVYLKRLKGNKHD	S	D	V	P	5	2	3	-0.17701	-0.257801	0.405948	0.171771	0.219645	STYX	-0.217405	0.234248	0.265788	0.443643	CENTER
CE170_378	sp|Q6A065|CE170_MOUSE	Q6A065	378	0.998	YLKRLKGNKHDDGTQSDSENAGAHRRCSKRA	S	D	S	E	4	2	2	-0.0480614	0.278782	1.21087	1.89965	NA	STYX	0.11536	0.571574	1.55526	0.0232851	NR
CE170_829	sp|Q6A065|CE170_MOUSE	Q6A065	829	0.986	KGDKKESSKSLVRQGSFTIDKPSSNIPIELI	S	F	T	I	5	2	3	-0.504574	-0.372222	0.138804	0.232996	0.301419	STYX	-0.438398	0.0549366	0.224406	0.521127	CENTER
CE170_950	sp|Q6A065|CE170_MOUSE	Q6A065	950	0.996	LVTGETERKSTQKRKSFTSLYKDRCSTSSPS	S	F	T	S	5	2	3	-0.200766	-0.253446	-0.422755	-0.356478	-0.170484	STYX	-0.227106	0.21555	-0.316572	0.201248	CENTER
CE350_1812	sp|E9Q309|CE350_MOUSE	E9Q309	1812	0.999	GSLADDDEAEDNKAASPGPPGLETRSPSPIS	S	P	G	P	4	2	2	0.254627	0.110787	NA	0.317876	0.262314	STYX	0.182707	0.326404	0.290095	0.478444	CENTER
CE350_1824	sp|E9Q309|CE350_MOUSE	E9Q309	1824	0.998	KAASPGPPGLETRSPSPISISSSETSSIMQK	S	P	I	S	4	2	2	0.264949	0.2855	-0.0468118	NA	0.212989	STYX	0.275225	0.175437	0.0830886	0.916059	CENTER
CE350_1928 1929 1930	sp|E9Q309|CE350_MOUSE	E9Q309	1928 1929 1930	0.888	TEQKGIASEEGSPMPSYSPRNSESCIPEDLG EQKGIASEEGSPMPSYSPRNSESCIPEDLGS QKGIASEEGSPMPSYSPRNSESCIPEDLGSP	S	Y	S	P	4	2	2	0.858591	0.0696085	-0.0207182	-0.487209	NA	STYX	0.4641	0.184948	-0.253963	0.406092	CENTER
CE350_2221	sp|E9Q309|CE350_MOUSE	E9Q309	2221	0.998	AQTESRDSLESAPSLSPVKELNAPDRIYDVS	S	P	V	K	5	2	3	-0.0595763	0.351518	0.47864	0.0286955	0.0415171	STYX	0.145971	0.526928	0.182951	0.655297	CENTER
CE350_2450	sp|E9Q309|CE350_MOUSE	E9Q309	2450	0.993	SVHSGVHSERLLELRSPTELMKSKERSDVGH	S	P	T	E	5	2	3	0.0329832	0.513485	0.251217	0.407576	0.325084	STYX	0.273234	0.285804	0.327959	0.328252	CENTER
CE350_874	sp|E9Q309|CE350_MOUSE	E9Q309	874	0.993	VKLAPQENGPWTKAISPPVKEDIEDAFSARI	S	P	P	V	5	2	3	0.103825	0.495912	0.638001	0.641579	0.346865	STYX	0.299868	0.210956	0.542148	0.12249	CENTER
CE57L_234	sp|Q8VDS7|CE57L_MOUSE	Q8VDS7	234	0.937	CLKREPPQQRDHKFRTPTFERKKPFRTTSQA	T	P	T	F	5	2	3	-0.305719	-0.123215	0.749959	0.389507	1.15885	STYX	-0.214467	0.257929	0.766105	0.0541198	CENTER
CECR2_1210	sp|E9Q2Z1|CECR2_MOUSE	E9Q2Z1	1210	0.995	PQGFSDWQRSLPSQRSPSGPPGSHPPRSLFS	S	P	S	G	5	2	3	0.547649	0.361947	0.210622	-0.134461	-0.246545	STYX	0.454798	0.076742	-0.0567945	0.703851	CENTER
CECR2_402	sp|E9Q2Z1|CECR2_MOUSE	E9Q2Z1	402	0.998	QGKELPPELSHLDLNSPMREGKKTKDLFELD	S	P	M	R	4	2	2	-0.377712	-0.0556492	-0.0579115	NA	-0.0239587	STYX	-0.216681	0.298696	-0.0409351	0.791408	CENTER
CELF1_28	sp|P28659|CELF1_MOUSE	P28659	28	0.995	LDAIKMFVGQVPRTWSEKDLRELFEQYGAVY	S	E	K	D	5	2	3	-0.749342	0.463529	-0.113943	0.0522638	-0.509247	STYX	-0.142907	0.798128	-0.190309	0.423054	CENTER
CENPA_15 16	sp|O35216|CENPA_MOUSE	O35216	15 16	0.898	_MGPRRKPQTPRRRPSSPAPGPSRQSSSVGS MGPRRKPQTPRRRPSSPAPGPSRQSSSVGSQ	S	S	P	A	5	2	3	0.541073	0.32678	-0.00673877	-0.403597	0.328446	STYX	0.433927	0.0858126	-0.0272965	0.796781	CENTER
CENPA_16	sp|O35216|CENPA_MOUSE	O35216	16	0.995	MGPRRKPQTPRRRPSSPAPGPSRQSSSVGSQ	S	P	A	P	5	2	3	0.511118	-0.11462	-0.410856	-0.252604	-0.219652	STYX	0.198249	0.53601	-0.294371	0.222871	CENTER
CENPC_699	sp|P49452|CENPC_MOUSE	P49452	699	0.996	VPDKKLHHKLVLPSNSPNVRRSNRIRLKPLE	S	P	N	V	5	2	3	0.305246	0.901013	0.259373	0.428662	0.680183	STYX	0.60313	0.0669457	0.456073	0.190528	CENTER
CENPJ_850	sp|Q569L8|CENPJ_MOUSE	Q569L8	850	0.999	APVKKGEDFKCDRRISPPPPSDLMVKFFPSL	S	P	P	P	5	2	3	0.163139	0.783063	0.259116	0.1145	0.163478	STYX	0.473101	0.123157	0.179031	0.627745	CENTER
CENPU_111	sp|Q8C4M7|CENPU_MOUSE	Q8C4M7	111	0.997	RGKASRNLDPSEDEASGNESIKVSTKKPRRK	S	G	N	E	5	2	3	0.463214	0.151524	0.0423706	-0.00528172	1.26978	STYX	0.307369	0.180256	0.435625	0.407141	CENTER
CENPU_164	sp|Q8C4M7|CENPU_MOUSE	Q8C4M7	164	0.999	EGPRSQQRQAAPAAPSPPERPAEPVTPRRTR	S	P	P	E	5	2	3	0.0926516	0.136957	0.175723	0.430957	-0.197932	STYX	0.114804	0.485682	0.136249	0.776105	CENTER
CENPU_174	sp|Q8C4M7|CENPU_MOUSE	Q8C4M7	174	0.998	APAAPSPPERPAEPVTPRRTRLHSAQLSPVD	T	P	R	R	4	2	2	0.407175	0.0892251	-0.0840481	0.14315	NA	STYX	0.2482	0.257219	0.029551	0.961027	CENTER
CENPU_186	sp|Q8C4M7|CENPU_MOUSE	Q8C4M7	186	0.999	EPVTPRRTRLHSAQLSPVDETPATQSQLKTQ	S	P	V	D	5	2	3	0.552865	0.437707	0.407316	0.612368	-0.017318	STYX	0.495286	0.0640801	0.334122	0.364393	CENTER
CENPV_105	sp|Q9CXS4|CENPV_MOUSE	Q9CXS4	105	1	EQRERWETFQKRQRLSFEGAAKLLLDTFEYQ	S	F	E	G	5	2	3	-0.930672	-0.194417	-0.606031	-0.868701	-0.0502841	STYX	-0.562544	0.0836584	-0.508339	0.103246	CENTER
CENPV_18	sp|Q9CXS4|CENPV_MOUSE	Q9CXS4	18	0.998	RTRSAVATGPREQRRSGATGGLSGGESRAQR	S	G	A	T	5	2	3	-0.170236	0.240059	-0.145803	-0.273581	0.10951	STYX	0.0349115	0.893499	-0.103291	0.585554	CENTER
CENPV_25	sp|Q9CXS4|CENPV_MOUSE	Q9CXS4	25	0.997	TGPREQRRSGATGGLSGGESRAQRSRSRTRA	S	G	G	E	5	2	3	-0.876968	0.0390107	-1.01777	-1.0203	-0.031472	STYX	-0.418979	0.297025	-0.689847	0.0622784	CENTER
CENPV_6	sp|Q9CXS4|CENPV_MOUSE	Q9CXS4	6	0.999	__________MRRTRSAVATGPREQRRSGAT	S	A	V	A	5	2	3	-0.835454	-0.0826436	0.0883939	-0.417762	0.306374	STYX	-0.459049	0.160082	-0.00766484	0.861827	CENTER
CENPV_84	sp|Q9CXS4|CENPV_MOUSE	Q9CXS4	84	0.997	AAEEPPPAVTPAASVSALDLGEQRERWETFQ	S	A	L	D	5	2	3	-0.32513	-0.270581	-0.370736	-0.505076	0.042291	STYX	-0.297856	0.125528	-0.27784	0.271079	CENTER
CEP41_114	sp|Q99NF3|CEP41_MOUSE	Q99NF3	114	0.999	SEADAEIAAKTNGKGSPEEQSPSPVQFINST	S	P	E	E	4	2	2	-0.104225	-0.0771301	0.287635	0.556113	NA	STYX	-0.0906776	0.614221	0.421874	0.315607	CENTER
CEP41_121	sp|Q99NF3|CEP41_MOUSE	Q99NF3	121	0.999	AAKTNGKGSPEEQSPSPVQFINSTGAGDSSR	S	P	V	Q	5	2	3	-0.20931	-0.18985	0.405432	-0.0965653	0.235824	STYX	-0.19958	0.268153	0.181563	0.647739	CENTER
CEP41_357 358	sp|Q99NF3|CEP41_MOUSE	Q99NF3	357 358	0.892	CRGGQNLPTSCPASHSSPRTLTSGHLQGKPW RGGQNLPTSCPASHSSPRTLTSGHLQGKPWK	S	S	P	R	4	2	2	-0.370831	0.228574	NA	0.8465	0.254926	STYX	-0.0711287	0.771827	0.550713	0.22851	CENTER
CEP41_358	sp|Q99NF3|CEP41_MOUSE	Q99NF3	358	0.985	RGGQNLPTSCPASHSSPRTLTSGHLQGKPWK	S	P	R	T	4	2	2	0.388335	-0.0733301	0.370892	-0.191992	NA	STYX	0.157502	0.529283	0.0894502	0.923964	CENTER
CEP55_23	sp|Q8BT07|CEP55_MOUSE	Q8BT07	23	0.985	DLIKSKWGSRPSSSKSDTALEKFKGEIAAFK	S	D	T	A	5	2	3	0.112286	-0.36303	1.00146	1.4717	1.14712	STYX	-0.125372	0.595059	1.20676	0.00933022	NR
CEP55_388	sp|Q8BT07|CEP55_MOUSE	Q8BT07	388	0.998	QHQLYVILKELRKAKSQITQLESLKQLHGFT	S	Q	I	T	5	2	3	-0.245688	-0.0899936	-0.0460082	0.62668	0.878981	STYQ	-0.167841	0.359023	0.486551	0.220565	CENTER
CEP55_40	sp|Q8BT07|CEP55_MOUSE	Q8BT07	40	0.988	TALEKFKGEIAAFKTSLDEITSGKGKMAEKG	S	L	D	E	5	2	3	0.434993	-0.478604	0.608301	1.7494	1.58523	STYX	-0.0218055	0.895012	1.31431	0.0128872	NR
CEP55_426	sp|Q8BT07|CEP55_MOUSE	Q8BT07	426	0.996	LQREPESRVKATSPKSPSAALNDSLVECPKC	S	P	S	A	5	2	3	0.210017	-0.00728965	0.37952	1.01884	0.932372	STYX	0.101363	0.574256	0.776911	0.0490187	CENTER
CEP55_434	sp|Q8BT07|CEP55_MOUSE	Q8BT07	434	0.999	VKATSPKSPSAALNDSLVECPKCSVQYPATE	S	L	V	E	4	2	2	0.242476	-0.168921	NA	1.13451	1.16958	STYX	0.0367772	0.886294	1.15205	0.0349586	NR
CEP68_419	sp|Q8C0D9|CEP68_MOUSE	Q8C0D9	419	1	TAEDCLPIGEDLRMGSPQLKTKEKEPPFPRQ	S	P	Q	L	5	2	3	-0.17889	0.00296326	-0.368258	-0.723692	-0.129528	STYX	-0.0879635	0.637504	-0.40716	0.144754	CENTER
CEP72_117	sp|Q9D3R3|CEP72_MOUSE	Q9D3R3	117	0.993	LQDVDFRLNPVVKNESDYRLFVVHMLPKLRQ	S	D	Y	R	4	2	2	-0.0422758	0.287722	NA	1.1975	1.66665	STYX	0.122723	0.550266	1.43207	0.0249054	NR
CEP72_236	sp|Q9D3R3|CEP72_MOUSE	Q9D3R3	236	0.999	HEADLHYAQESRHLLSPLSIQHQCGDSARRG	S	P	L	S	5	2	3	-0.134412	0.480813	0.997198	0.496111	0.253604	STYX	0.173201	0.593345	0.582305	0.123286	CENTER
CEP72_359 360	sp|Q9D3R3|CEP72_MOUSE	Q9D3R3	359 360	0.899	SDRECLSFLERADGPSSLEDSLSRQDGLEGQ DRECLSFLERADGPSSLEDSLSRQDGLEGQS	S	S	L	E	4	2	2	0.655322	0.111577	0.391036	NA	0.180793	STYX	0.38345	0.170681	0.285915	0.497841	CENTER
CEP72_360	sp|Q9D3R3|CEP72_MOUSE	Q9D3R3	360	0.997	DRECLSFLERADGPSSLEDSLSRQDGLEGQS	S	L	E	D	5	2	3	0.330965	0.317397	0.350845	-0.145377	0.510972	STYX	0.324181	0.13399	0.238813	0.54138	CENTER
CEP85_16	sp|Q8BMK0|CEP85_MOUSE	Q8BMK0	16	0.995	MAMQEKYPNDRSHATSPGSNVIQKGSSLGTE	S	P	G	S	5	2	3	0.190175	0.564993	0.79233	0.790184	0.63105	STYX	0.377584	0.133407	0.737854	0.0462739	CENTER
CEP95_449	sp|Q8BVV7|CEP95_MOUSE	Q8BVV7	449	0.998	GFSTCRKAPYRSHSLSPSSVNKHRQLEKEKK	S	P	S	S	4	2	2	0.292009	0.40157	NA	0.491814	0.543306	STYX	0.34679	0.120902	0.51756	0.218372	CENTER
CEP97_797	sp|Q9CZ62|CEP97_MOUSE	Q9CZ62	797	1	DSDDVAGDGKRHLACSPERFDASSDSETHRV	S	P	E	R	5	2	3	0.921103	0.0900037	-0.432937	0.00567732	0.250963	STYX	0.505553	0.1621	-0.0587656	0.727004	CENTER
CERS5_407	sp|Q9D6K9|CERS5_MOUSE	Q9D6K9	407	0.997	EQGTCKATGNLHFRASPHLHSCD________	S	P	H	L	5	2	3	-1.04075	-0.179528	-0.531226	-0.27981	-0.480896	STYX	-0.610138	0.0882842	-0.430644	0.10669	CENTER
CETN1_14	sp|P41209|CETN1_MOUSE	P41209	14	0.995	__MASTFRKSNVASTSYKRKVGPKPELTEDQ	S	Y	K	R	4	2	2	0.341884	-0.453322	0.585113	NA	0.230588	STYX	-0.055719	0.833345	0.40785	0.339607	CENTER
CETN2_20	sp|Q9R1K9|CETN2_MOUSE	Q9R1K9	20	0.999	FKKTTMASSAQRKRMSPKPELTEDQKQEIRE	S	P	K	P	4	2	2	0.00685509	-0.0342698	-0.820982	-0.543172	NA	STYX	-0.0137074	0.974366	-0.682077	0.0772583	CENTER
CF106_215	sp|Q3TT38|CF106_MOUSE	Q3TT38	215	1	TQPHRKVEGNFNPFASPQKNRQSDENNLTDP	S	P	Q	K	5	2	3	-0.29294	0.262633	-0.15446	-0.391964	-0.371874	STYX	-0.0151535	0.917931	-0.306099	0.212545	CENTER
CF157_30	sp|Q0VFX2|CF157_MOUSE	Q0VFX2	30	0.998	QGKKIGGKKDASGTKTPELAMVEELKEFYHK	T	P	E	L	5	2	3	-0.0691197	-0.320109	1.06481	1.18664	1.54291	STYX	-0.194614	0.321271	1.26479	0.00815441	NR
CF163_204 205	sp|Q3V037|CF163_MOUSE	Q3V037	204 205	0.884	EEFVTTGVTVIKDKKTSLGQLIKAKEHEMTI EFVTTGVTVIKDKKTSLGQLIKAKEHEMTIY	T	S	L	G	4	2	2	-0.400165	0.369717	0.977972	0.760201	NA	STYX	-0.0152242	0.90615	0.869086	0.0705414	NR
CF163_205	sp|Q3V037|CF163_MOUSE	Q3V037	205	0.991	EFVTTGVTVIKDKKTSLGQLIKAKEHEMTIY	S	L	G	Q	5	2	3	-0.719176	0.314993	1.10624	0.579969	0.576905	STYX	-0.202092	0.680346	0.754373	0.0514183	CENTER
CF163_301	sp|Q3V037|CF163_MOUSE	Q3V037	301	1	RAAFQKYINYTFPRLSPGHADFILPERKKTP	S	P	G	H	5	2	3	-0.395469	0.147123	0.473949	1.20493	1.02131	STYX	-0.124173	0.622153	0.900064	0.0309087	NR
CF163_315	sp|Q3V037|CF163_MOUSE	Q3V037	315	0.989	LSPGHADFILPERKKTPSILAKENEPRTD__	T	P	S	I	5	2	3	-0.276463	0.187774	1.2414	1.31214	1.2166	STYX	-0.0443445	0.831062	1.25671	0.00753198	NR
CF203_106	sp|Q9CQF4|CF203_MOUSE	Q9CQF4	106	0.999	KSTKKTLQKEADEEDSDEETSYPERSEQEEE	S	D	E	E	5	2	3	0.235321	-0.079575	-0.0979931	-0.03607	0.331305	STYX	0.077873	0.698253	0.0657472	0.958977	CENTER
CFA36_164	sp|Q8C6E0|CFA36_MOUSE	Q8C6E0	164	0.995	LEQEEMKILREVLRKSKEEYDQEEERKRKKQ	S	K	E	E	4	2	2	0.429279	-0.0650554	0.71674	1.10613	NA	STYX	0.182112	0.483431	0.911434	0.0665296	NR
CFA36_201	sp|Q8C6E0|CFA36_MOUSE	Q8C6E0	201	0.994	EELPVYTSEAEKMSNSQGDGEHFVQPPSEVK	S	Q	G	D	5	2	3	0.644876	0.411761	0.437225	0.428691	0.580133	STYQ	0.528319	0.0601562	0.482016	0.158716	CENTER
CFA36_254	sp|Q8C6E0|CFA36_MOUSE	Q8C6E0	254	0.999	SLTQKGLKIPGLEHASMEGPIANLSALGTEE	S	M	E	G	4	2	2	0.383139	-0.290689	-0.11872	-0.0552575	NA	STYX	0.0462248	0.942352	-0.0869887	0.68706	CENTER
CFA43_1354	sp|E9Q7R9|CFA43_MOUSE	E9Q7R9	1354	0.999	QADVTSLVPYGERPGSAKLNKENLAQLMKSM	S	A	K	L	5	2	3	-0.342255	-0.220853	0.558131	0.672135	0.859135	STYX	-0.281554	0.147675	0.696467	0.0580324	CENTER
CFA44_1097	sp|E9Q5M6|CFA44_MOUSE	E9Q5M6	1097	0.997	ESVLEKGKKFRPRTLSEIMVENQIEKTKKLI	S	E	I	M	5	2	3	-0.203171	-0.186181	1.12231	0.764345	1.34091	STYX	-0.194676	0.278701	1.07585	0.0145655	NR
CFA44_1288	sp|E9Q5M6|CFA44_MOUSE	E9Q5M6	1288	0.999	QDKSSSKQSGTGSGGSAGGGLVGFLKLSSGK	S	A	G	G	5	2	3	-0.0939043	-0.200261	1.34144	1.05439	1.03054	STYX	-0.147083	0.413766	1.14212	0.0106229	NR
CFA44_889	sp|E9Q5M6|CFA44_MOUSE	E9Q5M6	889	1	FSEFIVPKGIKAKVPSPRFGIESEAAPEDIE	S	P	R	F	5	2	3	0.196318	0.104082	1.55433	1.28066	1.21165	STYX	0.1502	0.393305	1.34888	0.00647092	NR
CFA74_199	sp|Q3UY96|CFA74_MOUSE	Q3UY96	199	1	HEAEAEARQRGLEVHSARQLQREREAMEKSE	S	A	R	Q	5	2	3	0.273771	-0.20594	0.79029	1.3966	0.159044	STYX	0.0339156	0.914091	0.781977	0.0786431	CENTER
CFA91_173	sp|Q8BRC6|CFA91_MOUSE	Q8BRC6	173	0.998	LNVVLSPVKTQPLLLTPESSKYAIIPTKSTV	T	P	E	S	5	2	3	-0.287838	0.093199	1.01697	0.941435	0.971975	STYX	-0.0973193	0.648553	0.976793	0.0170163	NR
CFA97_229 230	sp|Q6ZPR1|CFA97_MOUSE	Q6ZPR1	229 230	0.884	SESHSSGKCVSSVTPSSPKQRCKSGRKSSAQ ESHSSGKCVSSVTPSSPKQRCKSGRKSSAQP	S	S	P	K	5	2	3	0.173989	0.402721	0.338456	0.221831	0.562298	STYX	0.288355	0.182314	0.374195	0.276975	CENTER
CFA97_230	sp|Q6ZPR1|CFA97_MOUSE	Q6ZPR1	230	0.993	ESHSSGKCVSSVTPSSPKQRCKSGRKSSAQP	S	P	K	Q	5	2	3	0.752526	0.299438	0.399198	0.358116	0.704019	STYX	0.525982	0.0746284	0.487111	0.162115	CENTER
CFA97_8	sp|Q6ZPR1|CFA97_MOUSE	Q6ZPR1	8	0.996	________MDRFGDISEGEVDHSFFDSDFED	S	E	G	E	5	2	3	0.0203296	-0.00445337	0.270776	0.830714	1.32129	STYX	0.00793811	0.924634	0.807593	0.0578244	CENTER
CFDP1_202 203	sp|O88271|CFDP1_MOUSE	O88271	202 203	0.861	SFLKQTEREKPQALVTSPATPLPAGSGIKRA FLKQTEREKPQALVTSPATPLPAGSGIKRAS	T	S	P	A	4	2	2	0.095601	0.322779	-0.253273	NA	-0.397491	STYX	0.20919	0.296035	-0.325382	0.280582	CENTER
CFDP1_203	sp|O88271|CFDP1_MOUSE	O88271	203	0.995	FLKQTEREKPQALVTSPATPLPAGSGIKRAS	S	P	A	T	5	2	3	0.512368	0.342344	-0.125937	0.0419353	0.0811655	STYX	0.427356	0.0857921	-0.000945297	0.863167	CENTER
CFTR_710	sp|P26361|CFTR_MOUSE	P26361	710	1	RKNSILNSFSSVRKISIVQKTPLCIDGESDD	S	I	V	Q	5	2	3	-1.01914	0.233264	-2.35444	-2.20991	-1.90326	STYX	-0.392936	0.551845	-2.15587	0.00283045	NR
CG031_165	sp|Q9D5Y0|CG031_MOUSE	Q9D5Y0	165	0.997	YHTHISRGSVFPTFTSPKDLYTGIKARTQQP	S	P	K	D	5	2	3	0.0406481	0.0569606	0.790165	1.04969	1.17769	STYX	0.0488044	0.736517	1.00585	0.0167481	NR
CG031_219	sp|Q9D5Y0|CG031_MOUSE	Q9D5Y0	219	0.999	YELLDFPMDSKKKALTWPGQGVYYDFPKFVE	T	W	P	G	5	2	3	-0.335504	-0.0521302	1.10095	0.706987	1.46979	STYX	-0.193817	0.336716	1.09258	0.0153954	NR
CG031_484	sp|Q9D5Y0|CG031_MOUSE	Q9D5Y0	484	0.999	AYRDPYAMCPNPVRLSKSNILQNKTDTADFT	S	K	S	N	5	2	3	-0.26671	0.204151	1.21494	1.16494	1.87946	STYX	-0.0312797	0.871648	1.41978	0.00657049	NR
CG031_486	sp|Q9D5Y0|CG031_MOUSE	Q9D5Y0	486	1	RDPYAMCPNPVRLSKSNILQNKTDTADFTFD	S	N	I	L	5	2	3	-0.245183	0.115963	1.27361	1.10678	1.67166	STYX	-0.06461	0.754835	1.35069	0.00697856	NR
CG043_494 495	sp|Q3UTZ3|CG043_MOUSE	Q3UTZ3	494 495	0.897	SVSHPPPEARPLSRKSSPSSPAVRDLVERHQ VSHPPPEARPLSRKSSPSSPAVRDLVERHQA	S	S	P	S	4	2	2	1.01554	0.228072	0.295244	NA	-0.0324909	STYX	0.621807	0.0840009	0.131377	0.808657	CENTER
CG043_495	sp|Q3UTZ3|CG043_MOUSE	Q3UTZ3	495	0.981	VSHPPPEARPLSRKSSPSSPAVRDLVERHQA	S	P	S	S	5	2	3	0.594645	0.0109216	0.504095	0.286083	0.0483709	STYX	0.302784	0.292099	0.279516	0.434298	CENTER
CG043_517	sp|Q3UTZ3|CG043_MOUSE	Q3UTZ3	517	0.991	RDLVERHQASLGRSQSFSHQQPSRSHLMRSG	S	F	S	H	5	2	3	-0.486082	0.0500567	0.0709572	-0.156183	0.0436821	STYX	-0.218013	0.399133	-0.0138479	0.826935	CENTER
CG043_541	sp|Q3UTZ3|CG043_MOUSE	Q3UTZ3	541	0.999	SHLMRSGSVMERRAITPPVASPVGRPLYLPP	T	P	P	V	5	2	3	-0.330748	0.0339086	0.246873	-0.026852	0.611596	STYX	-0.14842	0.485611	0.277206	0.466918	CENTER
CG050_177	sp|Q9CXL3|CG050_MOUSE	Q9CXL3	177	0.996	AEALMQKLDEAEPEDSGGSPGKVQRLRQVLQ	S	G	G	S	4	2	2	0.56106	0.0767885	-0.342347	NA	-0.33381	STYX	0.318924	0.220131	-0.338079	0.263447	CENTER
CG050_180	sp|Q9CXL3|CG050_MOUSE	Q9CXL3	180	0.998	LMQKLDEAEPEDSGGSPGKVQRLRQVLQLLS	S	P	G	K	5	2	3	0.729916	0.266239	0.729314	0.19723	-0.177554	STYX	0.498077	0.0851168	0.249664	0.569472	CENTER
CG050_52	sp|Q9CXL3|CG050_MOUSE	Q9CXL3	52	0.999	KETASTLVQEASPELSPEERRVLERKLKKER	S	P	E	E	5	2	3	0.164045	-0.0756706	0.123233	0.0251641	-0.316477	STYX	0.0441872	0.795782	-0.0560266	0.715126	CENTER
CG057_185	sp|Q5SS90|CG057_MOUSE	Q5SS90	185	0.993	VKLPAINSKNPSKTGTPVSHKEPERSRLSLP	T	P	V	S	4	2	2	0.763108	-0.560842	1.27503	3.09695	NA	STYX	0.101133	0.99762	2.18599	0.0205263	NR
CG057_198	sp|Q5SS90|CG057_MOUSE	Q5SS90	198	0.997	TGTPVSHKEPERSRLSLPPMPGQKNSSPTNF	S	L	P	P	5	2	3	-0.0796477	-0.0244523	0.609585	0.361075	1.16004	STYX	-0.05205	0.790316	0.710233	0.0718213	CENTER
CG057_209	sp|Q5SS90|CG057_MOUSE	Q5SS90	209	0.99	RSRLSLPPMPGQKNSSPTNFSKLISNGYKDE	S	P	T	N	5	2	3	-0.0807082	0.272091	1.08167	1.75893	1.37982	STYX	0.0956914	0.651551	1.40681	0.00657439	NR
CG057_267	sp|Q5SS90|CG057_MOUSE	Q5SS90	267	0.999	DSKSNQDTETPENPETPEGSEKTPDAEVSSP	T	P	E	G	4	2	2	0.383147	0.121984	0.581643	0.748061	NA	STYX	0.252566	0.231427	0.664852	0.132958	CENTER
CG057_94	sp|Q5SS90|CG057_MOUSE	Q5SS90	94	0.991	RPDLLKHFAPGTRQGSPVAYSLPDWYIHHSK	S	P	V	A	5	2	3	-0.000375288	0.0225194	0.733439	-0.119187	0.142583	STYX	0.0110721	0.912306	0.252278	0.563258	CENTER
CGNL1_284	sp|Q6AW69|CGNL1_MOUSE	Q6AW69	284	1	TKKNRPDVLPFRRQDSAGPILDGARSRRSSS	S	A	G	P	5	2	3	-0.302836	-0.0454675	-0.33633	-0.664493	-0.569212	STYX	-0.174152	0.375225	-0.523345	0.0667392	CENTER
CGNL1_389	sp|Q6AW69|CGNL1_MOUSE	Q6AW69	389	0.997	GKRNRINPDDRKRSRSVDSAFPFGLQGNTEY	S	V	D	S	5	2	3	-1.09706	-0.162908	-0.0729894	-0.490209	-0.208676	STYX	-0.629987	0.0953276	-0.257291	0.290043	CENTER
CGNL1_602	sp|Q6AW69|CGNL1_MOUSE	Q6AW69	602	0.998	SRAAGSAQGSNQAPNSPSEGNSLLDQKNKLI	S	P	S	E	4	2	2	0.0362065	-0.185213	-0.742031	-0.728605	NA	STYX	-0.0745032	0.69917	-0.735318	0.0616943	CENTER
CGNL1_679	sp|Q6AW69|CGNL1_MOUSE	Q6AW69	679	1	TLQRRLEESEGELRKSLEELFQVKMEREQHQ	S	L	E	E	5	2	3	-0.105718	0.674783	-0.81283	-0.913333	0.0162297	STYX	0.284533	0.458913	-0.569978	0.0928556	CENTER
CH074_282	sp|Q80ZQ3|CH074_MOUSE	Q80ZQ3	282	0.999	PPLPCITTGPAALEDSPKASKANKGKKAKAK	S	P	K	A	5	2	3	-0.0269169	-0.375921	0.333521	0.449001	0.426171	STYX	-0.201419	0.343439	0.402898	0.230988	CENTER
CHAP1_108	sp|Q8K327|CHAP1_MOUSE	Q8K327	108	0.993	EQPKEQPSKDTESGKSPSPPERQNPAFDPAE	S	P	S	P	5	2	3	0.270906	0.184939	-0.830233	-0.674674	-0.594411	STYX	0.227923	0.236959	-0.699773	0.0270112	CENTER
CHAP1_204	sp|Q8K327|CHAP1_MOUSE	Q8K327	204	0.997	PPCELPELEKPERGPSPESVKSALVSSKPPK	S	P	E	S	5	2	3	0.336742	0.0714016	-1.03285	-0.551008	-0.67086	STYX	0.204072	0.318806	-0.751573	0.0238697	CENTER
CHAP1_265	sp|Q8K327|CHAP1_MOUSE	Q8K327	265	0.995	SLSASPESRKPARTASPEPRKPSPAESPELW	S	P	E	P	5	2	3	1.12051	-0.435429	0.326125	0.150271	-0.579789	STYX	0.342543	0.856427	-0.0344646	0.831842	CENTER
CHAP1_272	sp|Q8K327|CHAP1_MOUSE	Q8K327	272	0.998	SRKPARTASPEPRKPSPAESPELWKPFPAIA	S	P	A	E	5	2	3	-0.596529	0.200761	-0.342279	-0.658655	-0.488234	STYX	-0.197884	0.582412	-0.496389	0.0758536	CENTER
CHAP1_276	sp|Q8K327|CHAP1_MOUSE	Q8K327	276	0.998	ARTASPEPRKPSPAESPELWKPFPAIASEPR	S	P	E	L	5	2	3	-0.379473	0.37448	-0.570732	-0.761467	-0.942892	STYX	-0.0024961	0.932505	-0.758364	0.0219092	CENTER
CHAP1_394	sp|Q8K327|CHAP1_MOUSE	Q8K327	394	0.999	WKSGPPELRKTALPLSPEHWKAVPPVSPELR	S	P	E	H	5	2	3	-0.0297799	0.229989	-0.562567	-0.861719	-0.746209	STYX	0.100105	0.591011	-0.723498	0.0248361	CENTER
CHAP1_405	sp|Q8K327|CHAP1_MOUSE	Q8K327	405	1	ALPLSPEHWKAVPPVSPELRRPGPPLSPEIR	S	P	E	L	5	2	3	-0.0798613	0.130678	0.157803	-0.516515	-0.205024	STYX	0.0254083	0.863677	-0.187912	0.428502	CENTER
CHAP1_416	sp|Q8K327|CHAP1_MOUSE	Q8K327	416	1	VPPVSPELRRPGPPLSPEIRSPAGSPELKKP	S	P	E	I	5	2	3	-0.226472	-0.0466219	-0.514414	-0.485755	-0.598302	STYX	-0.136547	0.463156	-0.532824	0.0586864	CENTER
CHAP1_432 433 434 441	sp|Q8K327|CHAP1_MOUSE	Q8K327	432 433 434 441	0.891	PEIRSPAGSPELKKPSSSPDLWKVSPDQRKT EIRSPAGSPELKKPSSSPDLWKVSPDQRKTS IRSPAGSPELKKPSSSPDLWKVSPDQRKTSP PELKKPSSSPDLWKVSPDQRKTSPASLDFPE	S	S	S	P	4	2	2	0.340633	0.0587759	NA	-0.0647981	-0.173037	STYX	0.199704	0.333837	-0.118918	0.619837	CENTER
CHAP1_434	sp|Q8K327|CHAP1_MOUSE	Q8K327	434	0.993	IRSPAGSPELKKPSSSPDLWKVSPDQRKTSP	S	P	D	L	5	2	3	-0.109125	0.0101599	-0.269139	-0.579119	-0.546669	STYX	-0.0494827	0.799171	-0.464975	0.0907841	CENTER
CHAP1_448	sp|Q8K327|CHAP1_MOUSE	Q8K327	448	0.977	SSPDLWKVSPDQRKTSPASLDFPEPQKSSCG	S	P	A	S	4	2	2	0.0516765	0.23404	NA	-0.707561	-0.654381	STYX	0.142858	0.435042	-0.680971	0.0732172	CENTER
CHAP1_464	sp|Q8K327|CHAP1_MOUSE	Q8K327	464	0.998	PASLDFPEPQKSSCGSPPDLWKSSFIMESQK	S	P	P	D	5	2	3	-0.184364	0.211838	-0.572932	-0.323124	-0.715888	STYX	0.0137373	0.962163	-0.537315	0.0638873	CENTER
CHAP1_603	sp|Q8K327|CHAP1_MOUSE	Q8K327	603	0.997	EGLLATPKKLLDEALSPSSKKLKKDSQENSD	S	P	S	S	5	2	3	-0.0396345	0.197588	-0.717319	-0.683909	-0.91384	STYX	0.0789768	0.657808	-0.771689	0.0197076	CENTER
CHCH2_13	sp|Q9D1L0|CHCH2_MOUSE	Q9D1L0	13	0.997	___MPRGSRSRTSRVTPPASRAPQMRAAPRR	T	P	P	A	5	2	3	0.4195	0.044685	-0.578281	-0.164561	-0.165398	STYX	0.232093	0.307574	-0.302746	0.237096	CENTER
CHD1_1093 1094	sp|P40201|CHD1_MOUSE	P40201	1093 1094	0.893	ISFNGSEGRRSRSRRYSGSDSDSISERKRPK SFNGSEGRRSRSRRYSGSDSDSISERKRPKK	Y	S	G	S	5	2	3	0.367703	0.13397	0.587146	0.512023	0.149799	STYX	0.250837	0.227241	0.416323	0.236239	CENTER
CHD1_1678	sp|P40201|CHD1_MOUSE	P40201	1678	0.998	SDWQLDHRAASSGPRSPLDQRSPYGSRSPFE	S	P	L	D	5	2	3	-0.399743	0.122347	-0.506356	-1.14016	-0.579665	STYX	-0.138698	0.577866	-0.74206	0.0281473	CENTER
CHD1_5	sp|P40201|CHD1_MOUSE	P40201	5	0.997	___________MNGHSDEESVRNGSGESSQS	S	D	E	E	5	2	3	0.673329	0.0788368	0.988493	-0.195512	-1.01673	STYX	0.376083	0.197091	-0.0745821	0.703851	CENTER
CHD2_1365	sp|E9PZM4|CHD2_MOUSE	E9PZM4	1365	1	NKAPRLKDEHGLEPASPRHSDNPSEEGEVKD	S	P	R	H	5	2	3	0.19848	0.322458	-0.582767	-0.559912	-0.492991	STYX	0.260469	0.198974	-0.545223	0.0547617	CENTER
CHD4_1524	sp|Q6PDQ2|CHD4_MOUSE	Q6PDQ2	1524	0.992	WSMPELAEVEENKKMSQPGSPSPKTPTPSTP	S	Q	P	G	5	2	3	0.601266	0.372186	0.104595	0.0583257	0.156841	STYQ	0.486726	0.0695	0.106587	0.82229	CENTER
CHD4_1528	sp|Q6PDQ2|CHD4_MOUSE	Q6PDQ2	1528	0.998	ELAEVEENKKMSQPGSPSPKTPTPSTPGDTQ	S	P	S	P	5	2	3	0.275358	0.499374	-0.358482	-0.243339	-0.612189	STYX	0.387366	0.106863	-0.40467	0.1293	CENTER
CHD4_1546	sp|Q6PDQ2|CHD4_MOUSE	Q6PDQ2	1546	0.999	PKTPTPSTPGDTQPNTPAPVPPAEDGIKIEE	T	P	A	P	5	2	3	0.393926	0.0216783	-0.292588	-0.443725	-0.104546	STYX	0.207802	0.356434	-0.280286	0.249597	CENTER
CHD4_522	sp|Q6PDQ2|CHD4_MOUSE	Q6PDQ2	522	0.902	PSPTPVPRPPDADPNTPSPKPLEGRPERQFF	T	P	S	P	4	2	2	0.0118791	-0.139995	0.0465072	-0.353017	NA	STYX	-0.0640578	0.73304	-0.153255	0.565114	CENTER
CHD7_2548	sp|A2AJK6|CHD7_MOUSE	A2AJK6	2548	0.999	AFEEDIETPPIRNIPSPGQLDPDTRIPVINL	S	P	G	Q	5	2	3	-0.654297	-0.119155	-0.0625384	-0.202897	-0.225989	STYX	-0.386726	0.143934	-0.163808	0.43793	CENTER
CHD8_1980	sp|Q09XV5|CHD8_MOUSE	Q09XV5	1980	0.986	NYMQNHQAGASAASLSRCSTPLLHQQCTSRT	S	R	C	S	4	2	2	0.334872	0.114351	NA	-0.328067	-0.318691	STYX	0.224611	0.266648	-0.323379	0.279153	CENTER
CHD8_1999	sp|Q09XV5|CHD8_MOUSE	Q09XV5	1999	0.998	TPLLHQQCTSRTASPSPLRPDAPVEKSPEES	S	P	L	R	5	2	3	0.147668	0.849714	-0.509924	-0.444522	-0.171971	STYX	0.498691	0.126642	-0.375472	0.149805	CENTER
CHD8_2220	sp|Q09XV5|CHD8_MOUSE	Q09XV5	2220	0.987	LTPGEDGDSPVPTPRSGSAASMAEEEASAVT	S	G	S	A	5	2	3	-0.21912	-0.217321	-0.158173	-0.946127	-0.855327	STYX	-0.218221	0.231515	-0.653209	0.0536954	CENTER
CHD9_2750	sp|Q8BYH8|CHD9_MOUSE	Q8BYH8	2750	0.995	DSKELEGKKERTESQSPENGGERCVPGSPST	S	P	E	N	4	2	2	0.429804	-0.205716	-0.832271	-0.193592	NA	STYX	0.112044	0.760829	-0.512932	0.176797	CENTER
CHFR_231	sp|Q810L3|CHFR_MOUSE	Q810L3	231	0.998	KGRSSLVANGELSSLSPVFQDKEASFSLLES	S	P	V	F	5	2	3	0.306757	0.425124	0.431439	-0.110047	0.872535	STYX	0.36594	0.11124	0.397976	0.326988	CENTER
CHIC2_26	sp|Q9D9G3|CHIC2_MOUSE	Q9D9G3	26	0.993	EEDEERALEEQLLKYSPDPVVVRGSGHVTVF	S	P	D	P	4	2	2	0.219811	-0.291738	NA	0.924145	1.13533	STYX	-0.0359637	0.859166	1.02974	0.0463012	NR
CHIP_20	sp|Q9WUD1|CHIP_MOUSE	Q9WUD1	20	0.998	EEKEGGARLGTGGGGSPDKSPSAQELKEQGN	S	P	D	K	5	2	3	0.415521	0.640947	-0.114196	0.134843	-0.214617	STYX	0.528234	0.0599722	-0.064657	0.683038	CENTER
CHIP_24	sp|Q9WUD1|CHIP_MOUSE	Q9WUD1	24	0.992	GGARLGTGGGGSPDKSPSAQELKEQGNRLFV	S	P	S	A	5	2	3	-0.173729	-0.177227	0.148192	0.302774	-0.0809611	STYX	-0.175478	0.323472	0.123335	0.784458	CENTER
CHIP_274	sp|Q9WUD1|CHIP_MOUSE	Q9WUD1	274	0.998	EEHLQRVGHFDPVTRSPLTQEQLIPNLAMKE	S	P	L	T	5	2	3	-0.7183	-0.0372597	-0.288387	-0.132301	0.134549	STYX	-0.37778	0.218273	-0.0953797	0.608388	CENTER
CHKA_71	sp|O54804|CHKA_MOUSE	O54804	71	1	LPPPPPPPLPLPPPPSPPLADEQPEPRTRRR	S	P	P	L	5	2	3	-0.206521	-0.16322	0.358574	-0.126231	0.186719	STYX	-0.18487	0.299796	0.139687	0.752598	CENTER
CHM2B_199	sp|Q8BJF9|CHM2B_MOUSE	Q8BJF9	199	0.998	AARSLPSASTSKATISDEEIERQLKALGVD_	S	D	E	E	5	2	3	0.190975	0.504911	0.520229	0.912952	0.784668	STYX	0.347943	0.144305	0.739283	0.0492377	CENTER
CHP2_27	sp|Q9D869|CHP2_MOUSE	Q9D869	27	0.998	PDVEHIRRETGFSQASLLRLYHRFQALDRDE	S	L	L	R	5	2	3	0.0592624	-0.0105363	0.0160827	-0.391485	-0.117852	STYX	0.0243631	0.848924	-0.164418	0.454524	CENTER
CHRC1_122	sp|Q9JKP8|CHRC1_MOUSE	Q9JKP8	122	1	LKEKREEEEDNEDDGSDLGEALA________	S	D	L	G	5	2	3	0.747739	0.0277339	0.441413	0.352052	0.373611	STYX	0.387736	0.241541	0.389025	0.246563	CENTER
CHSP1_31	sp|Q9CR86|CHSP1_MOUSE	Q9CR86	31	0.996	QTSVGLLDTPRTRDRSPSPLRGNVVPSPLPT	S	P	S	P	5	2	3	-0.343232	-0.1154	-0.355851	-0.655988	-0.312966	STYX	-0.229316	0.242175	-0.441602	0.104936	CENTER
CHSP1_33	sp|Q9CR86|CHSP1_MOUSE	Q9CR86	33	0.996	SVGLLDTPRTRDRSPSPLRGNVVPSPLPTRR	S	P	L	R	5	2	3	-0.0348373	0.261629	-0.435874	-0.0710275	-0.28712	STYX	0.113396	0.562959	-0.264674	0.273026	CENTER
CHSP1_42	sp|Q9CR86|CHSP1_MOUSE	Q9CR86	42	0.999	TRDRSPSPLRGNVVPSPLPTRRTRTFSATVR	S	P	L	P	5	2	3	-0.184804	-0.0159736	-0.427146	-0.659308	-0.434679	STYX	-0.100389	0.58938	-0.507044	0.0700594	CENTER
CHSP1_51	sp|Q9CR86|CHSP1_MOUSE	Q9CR86	51	0.992	RGNVVPSPLPTRRTRTFSATVRASQGPVYKG	T	F	S	A	4	2	2	-0.213888	-0.298836	NA	-1.33573	-1.32358	STYX	-0.256362	0.174936	-1.32965	0.0194944	NR
CHSP1_53	sp|Q9CR86|CHSP1_MOUSE	Q9CR86	53	0.992	NVVPSPLPTRRTRTFSATVRASQGPVYKGVC	S	A	T	V	5	2	3	-0.186514	-0.0702042	-0.95989	-1.67579	-0.928999	STYX	-0.128359	0.476713	-1.18823	0.00695249	NR
CI135_85	sp|Q9CQC3|CI135_MOUSE	Q9CQC3	85	0.989	VKNLCMSTYKRFGSDSPRWMSEAREQMAQVL	S	P	R	W	5	2	3	-0.397931	0.463025	1.67084	-0.0686531	1.28654	STYX	0.0325468	0.981458	0.962908	0.0864273	NR
CIC_1080	sp|Q924A2|CIC_MOUSE	Q924A2	1080	0.994	PEIQLPLPPGKRRTQSLSALPKERDSSSEKD	S	L	S	A	5	2	3	-0.236678	-0.179759	-0.960281	-1.43107	-1.53741	STYX	-0.208219	0.251079	-1.30959	0.0050624	NR
CIC_1082	sp|Q924A2|CIC_MOUSE	Q924A2	1082	0.972	IQLPLPPGKRRTQSLSALPKERDSSSEKDGR	S	A	L	P	5	2	3	-0.112087	-0.271391	-1.08245	-1.45573	-1.77012	STYX	-0.191739	0.300899	-1.4361	0.00426082	NR
CIC_1338	sp|Q924A2|CIC_MOUSE	Q924A2	1338	0.997	PPLLPSRASRSQRAASEDMTSDEERMVICEE	S	E	D	M	5	2	3	-0.0123123	-0.115221	-0.915478	-1.00313	-1.31215	STYX	-0.0637664	0.735329	-1.07692	0.00744996	NR
CIC_1342 1343	sp|Q924A2|CIC_MOUSE	Q924A2	1342 1343	0.898	PSRASRSQRAASEDMTSDEERMVICEEEGDD SRASRSQRAASEDMTSDEERMVICEEEGDDD	T	S	D	E	5	2	3	0.338458	0.380424	0.116638	0.141371	-0.100432	STYX	0.35944	0.111594	0.0525256	0.980148	CENTER
CIC_1343	sp|Q924A2|CIC_MOUSE	Q924A2	1343	0.989	SRASRSQRAASEDMTSDEERMVICEEEGDDD	S	D	E	E	5	2	3	0.163947	-0.139189	-0.0809255	0.17582	0.0488478	STYX	0.0123786	0.94504	0.047914	0.992911	CENTER
CIC_1403	sp|Q924A2|CIC_MOUSE	Q924A2	1403	1	GEDPEGNKGFGRKVFSPVIRSSFTHCRPTLD	S	P	V	I	5	2	3	-0.388167	0.219153	-0.77331	-0.83246	-0.799516	STYX	-0.0845071	0.738555	-0.801762	0.0170801	CENTER
CIC_1625	sp|Q924A2|CIC_MOUSE	Q924A2	1625	0.998	GARTEMGTGSRVPGGSPMGVSLVYSDKKSAA	S	P	M	G	4	2	2	-0.599288	0.312004	NA	-0.682691	-0.471865	STYX	-0.143642	0.719611	-0.577278	0.106946	CENTER
CIC_1809	sp|Q924A2|CIC_MOUSE	Q924A2	1809	0.998	LQSVPSAPPPKAQSVSPVQATPSGGSAQLLP	S	P	V	Q	5	2	3	0.0104258	0.041591	-0.596142	-0.644851	-0.870426	STYX	0.0260084	0.840203	-0.703807	0.0269115	CENTER
CIC_20	sp|Q924A2|CIC_MOUSE	Q924A2	20	0.996	KKACPGLAGSASGSKSPPATRAKALRRRGAG	S	P	P	A	5	2	3	0.104501	0.0157551	-0.544756	-0.808745	-0.610997	STYX	0.0601282	0.694674	-0.654833	0.0335425	CENTER
CIC_2147 2148	sp|Q924A2|CIC_MOUSE	Q924A2	2147 2148	0.887	PAPPPPTETWPPTARSSPPPPLPAEERPGTK APPPPTETWPPTARSSPPPPLPAEERPGTKG	S	S	P	P	5	2	3	-0.0186596	-0.0893001	-0.270076	-0.741652	-0.321985	STYX	-0.0539799	0.779501	-0.444571	0.111767	CENTER
CIC_2284	sp|Q924A2|CIC_MOUSE	Q924A2	2284	0.994	PEEVLPSPTLQSLATSPRAILGSYRKKRKNS	S	P	R	A	5	2	3	-0.621969	-0.219877	-0.111458	-0.644009	-0.723522	STYX	-0.420923	0.0872388	-0.492996	0.0973901	CENTER
CIC_662	sp|Q924A2|CIC_MOUSE	Q924A2	662	0.996	ASPVIQRTAVRSRHLSASTPKAGVLTPPDLG	S	A	S	T	5	2	3	-0.285939	-0.0478736	-0.70682	-0.893572	-0.679387	STYX	-0.166906	0.388768	-0.759926	0.0205976	CENTER
CIC_766	sp|Q924A2|CIC_MOUSE	Q924A2	766	1	SHTPTPSTPAGFRAVSPAVPFSRSRQPSPLL	S	P	A	V	5	2	3	-0.245603	0.112534	-0.482576	-0.136499	-0.483151	STYX	-0.0665347	0.747831	-0.367409	0.158774	CENTER
CIC_778	sp|Q924A2|CIC_MOUSE	Q924A2	778	0.999	RAVSPAVPFSRSRQPSPLLLLPPPAGLTSDP	S	P	L	L	5	2	3	-0.0244906	0.0748156	-0.194386	-0.418928	0.0178653	STYX	0.0251625	0.845134	-0.198483	0.387725	CENTER
CING_129	sp|P59242|CING_MOUSE	P59242	129	0.983	SDEEPKDHLNGKLIRSQSQASLTGLAFMSPS	S	Q	S	Q	5	2	3	-0.267437	-0.0706266	-0.167636	-0.146789	-0.178528	STYQ	-0.169032	0.367038	-0.164318	0.437659	CENTER
CING_131	sp|P59242|CING_MOUSE	P59242	131	0.997	EEPKDHLNGKLIRSQSQASLTGLAFMSPSNR	S	Q	A	S	5	2	3	-0.153793	-0.209607	-0.351235	-0.861408	-0.310164	STYQ	-0.1817	0.308482	-0.507603	0.0854453	CENTER
CING_134	sp|P59242|CING_MOUSE	P59242	134	0.999	KDHLNGKLIRSQSQASLTGLAFMSPSNRSTS	S	L	T	G	5	2	3	-0.10652	-0.062375	-0.120327	-1.2634	-0.79732	STYX	-0.0844477	0.645319	-0.727016	0.0522794	CENTER
CING_197	sp|P59242|CING_MOUSE,sp|Q8R2R3|AAGAB_MOUSE	P59242	197	1	QKGGQVRGRTGRRTRTLPHEQRKRSQSLDSR	T	L	P	H	5	2	3	-0.134201	-0.317319	-0.434428	-0.867709	-0.850853	STYX	-0.22576	0.236602	-0.717663	0.0282509	CENTER
CING_206	sp|P59242|CING_MOUSE	P59242	206	0.993	TGRRTRTLPHEQRKRSQSLDSRLPRDTREER	S	Q	S	L	5	2	3	0.908402	-0.349097	0.0328838	0.445046	-0.995608	STYQ	0.279652	0.796998	-0.17256	0.651419	CENTER
CING_208	sp|P59242|CING_MOUSE	P59242	208	0.992	RRTRTLPHEQRKRSQSLDSRLPRDTREEREH	S	L	D	S	5	2	3	0.470815	-0.12544	-0.368875	-0.256473	-1.16008	STYX	0.172688	0.581409	-0.595142	0.0755511	CENTER
CING_268	sp|P59242|CING_MOUSE	P59242	268	0.998	SSFSRSRQTQDWVLQSFEETRDPAMVQFKST	S	F	E	E	5	2	3	-0.918496	-0.0025441	-0.0880198	-1.39902	-0.595685	STYX	-0.46052	0.240773	-0.694243	0.0715114	CENTER
CING_326	sp|P59242|CING_MOUSE	P59242	326	1	REGSSESEASVRRKVSLVLEQMQPLGMVSPA	S	L	V	L	5	2	3	-0.559796	0.420526	-0.762079	-0.983481	-1.24547	STYX	-0.0696351	0.838355	-0.997011	0.00964502	NR
CING_339	sp|P59242|CING_MOUSE	P59242	339	0.999	KVSLVLEQMQPLGMVSPASTKALAGQAELTR	S	P	A	S	5	2	3	0.0224759	-0.345223	-0.208906	-0.892072	-0.454076	STYX	-0.161374	0.448806	-0.518351	0.0854334	CENTER
CING_445	sp|P59242|CING_MOUSE	P59242	445	0.998	EAQVKELQLKLKHSQSPDSGKESLLKDLLDT	S	P	D	S	5	2	3	-0.273803	-0.035649	-1.04066	-0.780348	-0.922416	STYX	-0.154726	0.422631	-0.914475	0.0115064	NR
CING_84	sp|P59242|CING_MOUSE	P59242	84	0.999	TDSFGVQIKGGNNRGSPGALSSDSELPENPY	S	P	G	A	5	2	3	-0.438583	-0.115676	-0.548698	-0.98979	-0.810784	STYX	-0.27713	0.195066	-0.783091	0.0205331	CENTER
CING_89 90	sp|P59242|CING_MOUSE	P59242	89 90	0.868	VQIKGGNNRGSPGALSSDSELPENPYSQVKG QIKGGNNRGSPGALSSDSELPENPYSQVKGR	S	S	D	S	5	2	3	-0.475686	-0.08651	-0.533898	-0.731344	-0.616749	STYX	-0.281098	0.212686	-0.62733	0.0372475	CENTER
CING_90	sp|P59242|CING_MOUSE	P59242	90	0.992	QIKGGNNRGSPGALSSDSELPENPYSQVKGR	S	D	S	E	5	2	3	-0.0327321	-0.133039	-0.307745	-0.716204	-1.33808	STYX	-0.0828856	0.653661	-0.787342	0.0330808	CENTER
CIP2A_586	sp|Q8BWY9|CIP2A_MOUSE	Q8BWY9	586	0.999	FQPLNHGFSTSAKCLTPPPSKDNAPALNIED	T	P	P	P	5	2	3	0.249817	-0.648101	-0.119695	0.477941	0.326284	STYX	-0.199142	0.626933	0.228176	0.553297	CENTER
CIP2A_590	sp|Q8BWY9|CIP2A_MOUSE	Q8BWY9	590	0.933	NHGFSTSAKCLTPPPSKDNAPALNIEDLIEK	S	K	D	N	4	2	2	-0.206236	0.154351	0.416465	NA	-0.0153102	STYX	-0.0259428	0.900177	0.200578	0.678514	CENTER
CIP4_296	sp|Q8CJ53|CIP4_MOUSE	Q8CJ53	296	0.998	DLEFEDFSQVINRVPSDSSLGTPDGRPELRA	S	D	S	S	5	2	3	0.0758796	0.122583	-0.529241	-0.0671317	0.204095	STYX	0.0992315	0.53742	-0.130759	0.564853	CENTER
CJ062_39	sp|Q80Y39|CJ062_MOUSE	Q80Y39	39	0.999	HRANDSWIKSHFSRLSEERLPTYRYVSNNGH	S	E	E	R	5	2	3	-0.588204	-2.94e-05	0.632208	0.498858	0.238466	STYX	-0.294117	0.286974	0.45651	0.188405	CENTER
CJ062_87	sp|Q80Y39|CJ062_MOUSE	Q80Y39	87	0.999	LTTKHGERGAALHRDSFASKQKISGSSMTKE	S	F	A	S	5	2	3	-0.289934	0.183008	1.33824	1.35461	0.634545	STYX	-0.0534627	0.805873	1.10913	0.0156135	NR
CJ062_95	sp|Q80Y39|CJ062_MOUSE	Q80Y39	95	0.993	GAALHRDSFASKQKISGSSMTKEMQRESGKS	S	G	S	S	4	2	2	-0.19588	-0.22154	NA	1.14066	0.0522152	STYX	-0.20871	0.248532	0.596438	0.289117	CENTER
CJ062_98	sp|Q80Y39|CJ062_MOUSE	Q80Y39	98	0.993	LHRDSFASKQKISGSSMTKEMQRESGKSPSM	S	M	T	K	4	2	2	-0.148982	-0.214795	NA	0.62022	0.802473	STYX	-0.181888	0.309446	0.711347	0.113421	CENTER
CJ088_423	sp|Q9D2Q3|CJ088_MOUSE	Q9D2Q3	423	1	DAKMALLVDLLRGPNSPPPGMPLRHYDSRER	S	P	P	P	5	2	3	0.147633	0.397897	0.0659722	0.172738	0.124518	STYX	0.272765	0.203938	0.121076	0.78199	CENTER
CJ090_233	sp|D2J0Y4|CJ090_MOUSE	D2J0Y4	233	0.999	LDKSLSVPLERPQIASPKMHRSVLSLSLRCS	S	P	K	M	5	2	3	0.429469	0.0622504	0.75528	0.542415	0.801671	STYX	0.24586	0.281056	0.699789	0.056598	CENTER
CJ090_315	sp|D2J0Y4|CJ090_MOUSE	D2J0Y4	315	0.997	LVPVHLGSGTCPRTGSPPLENVKFADVGRNQ	S	P	P	L	5	2	3	0.340099	0.0541845	0.568156	0.572906	1.10048	STYX	0.197142	0.341265	0.74718	0.053387	CENTER
CJ090_54	sp|D2J0Y4|CJ090_MOUSE	D2J0Y4	54	1	LARRDGVSMHRRFALSPDRLGILTPSDDQGL	S	P	D	R	4	2	2	0.51249	0.112808	NA	0.237187	1.2517	STYX	0.312649	0.1976	0.744441	0.169526	CENTER
CK068_36	sp|Q8VD62|CK068_MOUSE	Q8VD62	36	1	GGGAADPGQERSRARSWVGAERSEGRRMEPN	S	W	V	G	5	2	3	0.530704	-0.193984	-0.68038	-1.31373	-1.03984	STYX	0.16836	0.67565	-1.01132	0.0100814	NR
CK074_235	sp|Q9CQI4|CK074_MOUSE	Q9CQI4	235	0.994	EIATIQELSKQKRVGSGTNVCELHD______	S	G	T	N	5	2	3	0.0842564	0.237007	0.572828	0.32102	0.858383	STYX	0.160632	0.380399	0.584077	0.107949	CENTER
CK091_34	sp|Q9D1Z2|CK091_MOUSE	Q9D1Z2	34	0.991	PPLYFPSLYDRGISSSPLSDFNIWKKLFVPL	S	P	L	S	5	2	3	0.174677	-0.14636	1.01581	1.19642	1.16079	STYX	0.0141583	0.944681	1.12434	0.0107335	NR
CK096_210	sp|Q3UPL5|CK096_MOUSE	Q3UPL5	210	0.999	VSPMEEEKAKKSFLQSLECLRRSTQSLSLQR	S	L	E	C	5	2	3	0.0675214	-0.157559	0.566205	0.293368	0.452464	STYX	-0.0450186	0.817657	0.437346	0.200094	CENTER
CK5P2_1195	sp|Q8K389|CK5P2_MOUSE	Q8K389	1195	1	HQVRYVKHMKILRPLTPEMIDGKMLESLKQQ	T	P	E	M	5	2	3	-0.386105	0.0930943	0.997838	0.94496	1.17431	STYX	-0.146506	0.536603	1.03903	0.0141269	NR
CK5P2_1810	sp|Q8K389|CK5P2_MOUSE	Q8K389	1810	0.992	VLRKARGNLELRPGATRPGASSPSRPGS___	T	R	P	G	5	2	3	-0.267837	-0.0699693	0.0737089	0.226465	-0.28908	STYX	-0.168903	0.367996	0.00369797	0.880362	CENTER
CK5P2_1815 1816	sp|Q8K389|CK5P2_MOUSE	Q8K389	1815 1816	0.886	RGNLELRPGATRPGASSPSRPGS________ GNLELRPGATRPGASSPSRPGS_________	S	S	P	S	4	2	2	-0.275387	0.0631348	0.241069	NA	-0.145186	STYX	-0.106126	0.603193	0.0479415	0.999584	CENTER
CKAP4_26	sp|Q8BMK4|CKAP4_MOUSE	Q8BMK4	26	1	GGHGAASPSDKGAHPSGGADDVAKKPPAAPQ	S	G	G	A	4	2	2	0.0967917	-0.0103254	NA	0.859804	1.04104	STYX	0.0432332	0.767955	0.950421	0.0557821	NR
CKAP4_367	sp|Q8BMK4|CKAP4_MOUSE	Q8BMK4	367	1	RLEEELQQLKVGAHGSEEGAVFKDSKALEEL	S	E	E	G	4	2	2	-0.168695	-0.221438	NA	0.258189	-0.0755887	STYX	-0.195066	0.278252	0.0913	0.897033	CENTER
CKAP5_1528	sp|A2AGT5|CKAP5_MOUSE	A2AGT5	1528	0.998	IFEPVLIPEPKIRAVSPHFDDMHSNTASTIN	S	P	H	F	4	2	2	0.102753	-0.239052	NA	-0.686976	-0.575076	STYX	-0.0681496	0.739744	-0.631026	0.0869017	CENTER
CKAP5_816	sp|A2AGT5|CKAP5_MOUSE	A2AGT5	816	0.999	LLSQIDAEFQKMQGQSPPAPTRGIAKHSTSA	S	P	P	A	5	2	3	0.264331	0.132489	0.681317	0.613298	0.492008	STYX	0.19841	0.291327	0.595541	0.090759	CENTER
CKLF_144	sp|Q9DAS1|CKLF_MOUSE	Q9DAS1	144	0.969	CQKLRFRPRQPYQKKSTNDIDDRE_______	S	T	N	D	5	2	3	0.000695732	-0.279179	1.55666	1.28032	1.71346	STYX	-0.139242	0.477619	1.51682	0.00505212	NR
CKLF_144 145	sp|Q9DAS1|CKLF_MOUSE	Q9DAS1	144 145	0.894	CQKLRFRPRQPYQKKSTNDIDDRE_______ QKLRFRPRQPYQKKSTNDIDDRE________	S	T	N	D	5	2	3	0.150976	-0.213238	1.3109	0.809882	1.45473	STYX	-0.0311313	0.880963	1.19184	0.0109064	NR
CKS2_51	sp|P56390|CKS2_MOUSE	P56390	51	0.996	HLMSEEEWRRLGVQQSLGWVHYMIHEPEPHI	S	L	G	W	4	2	2	-0.52945	0.556148	NA	0.616246	0.641027	STYX	0.013349	0.939397	0.628636	0.147502	CENTER
CL045_177	sp|Q9CX66|CL045_MOUSE	Q9CX66	177	0.998	LPNAEGGKGKIEILDSPASKKKKQ_______	S	P	A	S	5	2	3	-0.123619	0.0410862	-0.938137	-1.24772	-1.07549	STYX	-0.0412662	0.837476	-1.08712	0.0070282	NR
CL16A_848 849	sp|Q80U30|CL16A_MOUSE	Q80U30	848 849	0.896	SQHLPFRFYEQCRRGSSDPTVQRSVFASVDK QHLPFRFYEQCRRGSSDPTVQRSVFASVDKV	S	S	D	P	5	2	3	-0.112257	-0.191911	0.244957	0.77046	0.610097	STYX	-0.152084	0.395305	0.541838	0.132881	CENTER
CL16A_849	sp|Q80U30|CL16A_MOUSE	Q80U30	849	0.981	QHLPFRFYEQCRRGSSDPTVQRSVFASVDKV	S	D	P	T	4	2	2	0.223457	-0.22247	NA	-0.159146	0.545647	STYX	0.0004931	0.98065	0.19325	0.737935	CENTER
CLAP1_1088	sp|Q80TV8|CLAP1_MOUSE	Q80TV8	1088	0.998	LLHNHLKNSSNTGVGSPSNTIGRTPSRHPSS	S	P	S	N	5	2	3	-0.218368	-0.206512	-0.254912	-0.172209	-0.227993	STYX	-0.21244	0.242175	-0.218371	0.331473	CENTER
CLAP1_1193	sp|Q80TV8|CLAP1_MOUSE	Q80TV8	1193	1	SLRGVTEAIEKFSFRSQEDLNEPIKRDGKKD	S	Q	E	D	5	2	3	-0.442822	-0.0993762	-1.38712	-1.56662	-1.58694	STYQ	-0.271099	0.210956	-1.51356	0.00357158	NR
CLAP1_1220	sp|Q80TV8|CLAP1_MOUSE	Q80TV8	1220	0.998	GKKDCDIVSRDGGAASPATEGRGGSEIEGGR	S	P	A	T	5	2	3	0.287278	-0.21382	-0.772172	-0.284472	-0.508184	STYX	0.0367294	0.913109	-0.521609	0.07324	CENTER
CLAP1_559	sp|Q80TV8|CLAP1_MOUSE	Q80TV8	559	0.996	DSIVSLPQSDRSSSSSQESLNRPLSAKRSPT	S	Q	E	S	5	2	3	-0.21848	-0.0886416	-0.262416	-0.241732	0.0474329	STYQ	-0.153561	0.397247	-0.152238	0.469855	CENTER
CLAP1_568	sp|Q80TV8|CLAP1_MOUSE	Q80TV8	568	0.999	DRSSSSSQESLNRPLSAKRSPTGSTASRGST	S	A	K	R	5	2	3	-0.279517	-0.236582	0.798135	0.344475	0.721896	STYX	-0.258049	0.168513	0.621502	0.0884798	CENTER
CLAP1_600	sp|Q80TV8|CLAP1_MOUSE	Q80TV8	600	0.996	STKSVSTTGSLQRSRSDIDVNAAASAKSKVS	S	D	I	D	5	2	3	-0.343874	-0.355538	-0.389038	-0.613614	-0.292293	STYX	-0.349706	0.0875514	-0.431648	0.109002	CENTER
CLAP1_620	sp|Q80TV8|CLAP1_MOUSE	Q80TV8	620	0.933	NAAASAKSKVSSSSGSPAFSSAAALPPGSYA	S	P	A	F	5	2	3	-0.586256	-0.130397	-0.0608602	0.0893058	0.250511	STYX	-0.358326	0.145204	0.0929854	0.866313	CENTER
CLAP1_676	sp|Q80TV8|CLAP1_MOUSE	Q80TV8	676	0.996	GRSRAKVVSQSQRSRSANPAGAGSRSSSPGK	S	A	N	P	5	2	3	0.669207	-0.481885	2.66703	1.00501	1.02196	STYX	0.0936614	0.982714	1.56467	0.00893161	NR
CLAP1_684	sp|Q80TV8|CLAP1_MOUSE	Q80TV8	684	0.999	SQSQRSRSANPAGAGSRSSSPGKLLGSGLAG	S	R	S	S	5	2	3	0.601367	-0.735563	1.33224	0.917725	1.21722	STYX	-0.0670981	0.879631	1.15573	0.0105551	NR
CLAP1_708	sp|Q80TV8|CLAP1_MOUSE	Q80TV8	708	0.995	LGSGLAGGSSRGPPVTPSSEKRSKIPRSQGC	T	P	S	S	5	2	3	0.039428	-0.196539	0.298514	0.0379349	0.450929	STYX	-0.0785554	0.685055	0.262459	0.461476	CENTER
CLAP2_333	sp|Q8BRT1|CLAP2_MOUSE	Q8BRT1	333	0.993	GSVASLPQSDRSSSSSQESLNRPFSSKWSTA	S	Q	E	S	5	2	3	-0.209178	0.0103044	-0.518451	-0.671083	-1.12235	STYQ	-0.0994366	0.600215	-0.77063	0.0238534	CENTER
CLAP2_461	sp|Q8BRT1|CLAP2_MOUSE	Q8BRT1	461	0.998	KTDSRGRSRTKMVSQSQPGSRSGSPGRVLTT	S	Q	P	G	5	2	3	-0.113215	-0.222178	-0.906745	-0.732218	-0.335032	STYQ	-0.167696	0.353215	-0.657998	0.0396537	CENTER
CLAP2_465	sp|Q8BRT1|CLAP2_MOUSE	Q8BRT1	465	0.998	RGRSRTKMVSQSQPGSRSGSPGRVLTTTALS	S	R	S	G	5	2	3	0.195845	-0.196054	-0.13675	-0.302547	-0.0985854	STYX	-0.00010425	0.988371	-0.179294	0.410787	CENTER
CLAP2_535	sp|Q8BRT1|CLAP2_MOUSE	Q8BRT1	535	0.999	ARSSRIPRPSVSQGCSREASRESSRDTSPVR	S	R	E	A	5	2	3	0.186492	-0.208585	-0.515243	-1.17582	-1.01242	STYX	-0.0110464	0.949341	-0.901163	0.0152929	NR
CLAP2_547	sp|Q8BRT1|CLAP2_MOUSE	Q8BRT1	547	0.992	QGCSREASRESSRDTSPVRSFQPLGPGYGIS	S	P	V	R	5	2	3	0.142091	0.942818	0.481581	0.101529	-2.18404	STYX	0.542455	0.123952	-0.533643	0.6509	CENTER
CLAP2_947	sp|Q8BRT1|CLAP2_MOUSE	Q8BRT1	947	0.997	SLRGVTEAIQNFSFRSQEDMSEPVRRDPKKE	S	Q	E	D	5	2	3	0.659402	0.135432	0.0689222	-0.834109	-0.311107	STYQ	0.397417	0.151234	-0.358765	0.22635	CENTER
CLASR_285	sp|Q8CFC7|CLASR_MOUSE	Q8CFC7	285	0.994	QRREFREKRLRGRKISPPSYARRDSPTYDPY	S	P	P	S	5	2	3	-0.177165	0.284438	-0.28742	-0.289518	-0.493673	STYX	0.0536364	0.845486	-0.35687	0.159687	CENTER
CLASR_450	sp|Q8CFC7|CLASR_MOUSE	Q8CFC7	450	0.996	RHSDGGSRDGHRYSRSPARRGGYVPRRRSRS	S	P	A	R	5	2	3	1.06846	0.225025	1.38227	0.784364	-0.595671	STYX	0.646743	0.0834173	0.523656	0.348899	CENTER
CLASR_541	sp|Q8CFC7|CLASR_MOUSE	Q8CFC7	541	1	HSPSPPREKLTRPAASPAVGEKLKKTEPAAG	S	P	A	V	5	2	3	0.253876	0.484373	-0.434663	0.0857522	-0.26761	STYX	0.369124	0.118759	-0.205507	0.378143	CENTER
CLCB_175	sp|Q6IRU5|CLCB_MOUSE	Q6IRU5	175	1	AFYQQPDADTIGYVASEEAFVKESKEETPGT	S	E	E	A	4	2	2	0.48496	0.235459	0.466819	NA	1.00228	STYX	0.360209	0.126698	0.734551	0.120815	CENTER
CLCC1_433	sp|Q99LI2|CLCC1_MOUSE	Q99LI2	433	0.998	SKRDALRQRFHSGNKSPEVLRAFDLPDTEAQ	S	P	E	V	5	2	3	0.0163331	-0.134988	-1.03419	-0.533698	-0.577522	STYX	-0.0593275	0.754493	-0.715138	0.0288794	CENTER
CLCN2_712	sp|Q9R0A1|CLCN2_MOUSE	Q9R0A1	712	0.997	GQTHKPLKPALKRGPSNSTSLQEGTTGNMES	S	N	S	T	5	2	3	-0.0586732	-0.27569	-0.0623675	-0.526884	-0.496258	STYX	-0.167181	0.380399	-0.361836	0.172785	CENTER
CLCN2_875	sp|Q9R0A1|CLCN2_MOUSE	Q9R0A1	875	0.991	VRPPLASFRDSATSSSDTETTEVHALWGPRS	S	D	T	E	4	2	2	-0.133561	-0.200792	NA	-0.891956	-0.610904	STYX	-0.167176	0.348392	-0.75143	0.0620643	CENTER
CLCN7_47	sp|O70496|CLCN7_MOUSE	O70496	47	0.983	EETPLLNGAGPGARQSHSALFRIGQMNNVEL	S	H	S	A	5	2	3	-0.078273	-0.00570265	-0.191645	-0.381456	-0.505873	STYX	-0.0419878	0.835718	-0.359658	0.161211	CENTER
CLCN7_49	sp|O70496|CLCN7_MOUSE	O70496	49	0.998	TPLLNGAGPGARQSHSALFRIGQMNNVELDD	S	A	L	F	5	2	3	-0.299733	-0.17538	-0.0800413	-0.691829	-1.15437	STYX	-0.237556	0.206635	-0.64208	0.0698568	CENTER
CLD11_196 197 198	sp|Q60771|CLD11_MOUSE	Q60771	196 197 198	0.892	DAQSFGENRFYYSSGSSSPTHAKSAHV____ AQSFGENRFYYSSGSSSPTHAKSAHV_____ QSFGENRFYYSSGSSSPTHAKSAHV______	S	S	S	P	5	2	3	-0.87716	0.0550057	-0.0700523	-0.281854	-0.670945	STYX	-0.411077	0.318205	-0.34095	0.206381	CENTER
CLD11_198	sp|Q60771|CLD11_MOUSE	Q60771	198	0.995	QSFGENRFYYSSGSSSPTHAKSAHV______	S	P	T	H	5	2	3	-0.722849	0.782942	-0.115995	-0.174082	-0.771818	STYX	0.0300463	0.942442	-0.353965	0.211081	CENTER
CLGN_578	sp|P52194|CLGN_MOUSE	P52194	578	0.998	EDRETLEGQEEVSKLSKSGSEDEMKDADESP	S	K	S	G	5	2	3	0.70468	-0.519843	0.707959	1.66683	1.92565	STYX	0.0924187	0.994926	1.43348	0.00994469	NR
CLGN_580	sp|P52194|CLGN_MOUSE	P52194	580	0.994	RETLEGQEEVSKLSKSGSEDEMKDADESPGS	S	G	S	E	4	2	2	-0.0443173	-0.0968149	NA	0.776821	1.87654	STYX	-0.0705661	0.705932	1.32668	0.0417502	NR
CLGN_582	sp|P52194|CLGN_MOUSE	P52194	582	0.995	TLEGQEEVSKLSKSGSEDEMKDADESPGSGD	S	E	D	E	5	2	3	0.511952	-0.300212	1.12279	1.34123	1.35191	STYX	0.10587	0.863234	1.27198	0.00752168	NR
CLH1_394	sp|Q68FD5|CLH1_MOUSE	Q68FD5	394	0.996	EAAKVAANAPKGILRTPDTIRRFQSVPAQPG	T	P	D	T	5	2	3	-0.272298	0.186976	0.166504	-0.0325238	0.49046	STYX	-0.042661	0.836069	0.208147	0.595739	CENTER
CLIP1_192	sp|Q922J3|CLIP1_MOUSE	Q922J3	192	0.99	EPSATPQISNLTKTASESISNLSEAGSVKKG	S	E	S	I	4	2	2	-0.1159	-0.110562	0.199713	NA	0.196865	STYX	-0.113231	0.5226	0.198289	0.651042	CENTER
CLIP1_194	sp|Q922J3|CLIP1_MOUSE	Q922J3	194	0.997	SATPQISNLTKTASESISNLSEAGSVKKGER	S	I	S	N	5	2	3	-0.301273	0.368565	0.217776	0.0182767	0.394022	STYX	0.0336463	0.971853	0.210025	0.57112	CENTER
CLIP1_199	sp|Q922J3|CLIP1_MOUSE	Q922J3	199	0.998	ISNLTKTASESISNLSEAGSVKKGERELKVG	S	E	A	G	5	2	3	0.245559	0.136366	-0.076506	-0.55386	-0.430902	STYX	0.190962	0.302638	-0.353756	0.179235	CENTER
CLIP1_309	sp|Q922J3|CLIP1_MOUSE	Q922J3	309	0.998	AVRRVMAATPASLKRSPSASSLSSMSSVASS	S	P	S	A	5	2	3	-0.121974	0.152158	0.35008	0.373331	0.0911786	STYX	0.0150922	0.925528	0.27153	0.437156	CENTER
CLIP1_311	sp|Q922J3|CLIP1_MOUSE	Q922J3	311	0.997	RRVMAATPASLKRSPSASSLSSMSSVASSVS	S	A	S	S	5	2	3	-0.0847155	0.0487438	0.612514	0.780172	0.41467	STYX	-0.0179859	0.947817	0.602452	0.0925246	CENTER
CLIP4_456	sp|Q8CI96|CLIP4_MOUSE	Q8CI96	456	0.984	KKLTTSSGGKKTLSKSPSLPSRASAGLKSSA	S	P	S	L	5	2	3	-0.328175	-0.0956893	-0.44985	-0.64904	-0.651277	STYX	-0.211932	0.277505	-0.583389	0.0466848	CENTER
CLIP4_580 581 582 583	sp|Q8CI96|CLIP4_MOUSE	Q8CI96	580 581 582 583	0.885	SNKQNHSYPGFRRSFSTTSASSQKEINRRNA NKQNHSYPGFRRSFSTTSASSQKEINRRNAF KQNHSYPGFRRSFSTTSASSQKEINRRNAFA QNHSYPGFRRSFSTTSASSQKEINRRNAFAK	S	T	T	S	5	2	3	-0.319695	0.261138	-0.724951	-0.977622	-0.920394	STYX	-0.0292782	0.879898	-0.874322	0.0133064	NR
CLIP4_608 609 610 611 612	sp|Q8CI96|CLIP4_MOUSE	Q8CI96	608 609 610 611 612	0.881	RNAFAKTKTTLRRSWSSSTTAGGLEGTVKLH NAFAKTKTTLRRSWSSSTTAGGLEGTVKLHE AFAKTKTTLRRSWSSSTTAGGLEGTVKLHEG FAKTKTTLRRSWSSSTTAGGLEGTVKLHEGS AKTKTTLRRSWSSSTTAGGLEGTVKLHEGSQ	S	S	S	T	5	2	3	-0.700147	-0.153436	-0.803388	-0.929964	-0.370775	STYX	-0.426792	0.114485	-0.701376	0.0326351	CENTER
CLK3_157	sp|O35492|CLK3_MOUSE	O35492	157	0.991	AAGAWETMHHCKRYRSPEPDPYLSYRWKRRR	S	P	E	P	5	2	3	-0.240541	0.25788	0.31239	0.120478	0.0685895	STYX	0.00866915	0.995914	0.167152	0.664605	CENTER
CLK3_88	sp|O35492|CLK3_MOUSE	O35492	88	1	RDLHRCRPDPGGAGQSPRVCEFGARAVRPLG	S	P	R	V	4	2	2	0.137451	-0.150551	-0.221082	-0.0709607	NA	STYX	-0.0065499	0.981996	-0.146022	0.563649	CENTER
CLK4_138	sp|O35493|CLK4_MOUSE	O35493	138	0.992	SHQSHSKSHRRKRSRSIEDDEEGHLICQSGD	S	I	E	D	5	2	3	0.0780135	-0.275302	-0.104005	0.196058	0.345215	STYX	-0.0986441	0.635255	0.145756	0.733265	CENTER
CLMN_163	sp|Q8C5W0|CLMN_MOUSE	Q8C5W0	163	0.961	SRSSPSSSLSPGSGGTDSDSSYPPTPTTERS	T	D	S	D	4	2	2	0.0699709	-0.207514	0.500387	0.50406	NA	STYX	-0.0687717	0.729739	0.502224	0.228727	CENTER
CLMN_172	sp|Q8C5W0|CLMN_MOUSE	Q8C5W0	172	0.995	SPGSGGTDSDSSYPPTPTTERSVAVAVKDQR	T	P	T	T	4	2	2	0.0832435	0.0107221	0.209676	0.20378	NA	STYX	0.0469828	0.748343	0.206728	0.634071	CENTER
CLMN_317	sp|Q8C5W0|CLMN_MOUSE	Q8C5W0	317	0.994	DKEAPIESTFVRIKESPSEQGSRVLLLSENG	S	P	S	E	5	2	3	0.2069	0.183841	1.3582	1.24741	0.96467	STYX	0.195371	0.288199	1.19009	0.00952996	NR
CLMN_319	sp|Q8C5W0|CLMN_MOUSE	Q8C5W0	319	0.995	EAPIESTFVRIKESPSEQGSRVLLLSENGER	S	E	Q	G	5	2	3	0.0268517	-0.156415	1.74783	1.09922	0.583279	STYX	-0.0647815	0.730331	1.14344	0.018217	NR
CLMN_323	sp|Q8C5W0|CLMN_MOUSE	Q8C5W0	323	0.996	ESTFVRIKESPSEQGSRVLLLSENGERAYTV	S	R	V	L	4	2	2	0.226954	-0.588614	2.04434	NA	1.48291	STYX	-0.18083	0.621755	1.76363	0.0191126	NR
CLMN_358	sp|Q8C5W0|CLMN_MOUSE	Q8C5W0	358	0.998	SYPPPDKVFVCDQLESPTGFCLDSAPSHKLS	S	P	T	G	5	2	3	-0.56699	-0.227217	0.620064	-0.858521	-0.447778	STYX	-0.397103	0.0905552	-0.228745	0.424802	CENTER
CLMN_419	sp|Q8C5W0|CLMN_MOUSE	Q8C5W0	419	0.998	ESSILSTRKDGRRSNSLPVKKTVHFEADLHK	S	L	P	V	5	2	3	-0.0841085	0.23941	1.25075	0.672283	1.06858	STYX	0.0776508	0.702506	0.997205	0.0190615	NR
CLMN_715	sp|Q8C5W0|CLMN_MOUSE	Q8C5W0	715	0.997	APPSTSVSLETLRSHSEEGLDFKPSPPLSKI	S	E	E	G	5	2	3	-0.589066	-0.146669	0.829436	0.593453	0.558171	STYX	-0.367868	0.131769	0.660354	0.0689212	CENTER
CLMN_724	sp|Q8C5W0|CLMN_MOUSE	Q8C5W0	724	0.999	ETLRSHSEEGLDFKPSPPLSKISVIPHDLFY	S	P	P	L	5	2	3	-0.362791	0.236281	0.54908	0.466166	0.733921	STYX	-0.063255	0.790143	0.583056	0.0988555	CENTER
CLMN_905	sp|Q8C5W0|CLMN_MOUSE	Q8C5W0	905	0.996	DHVESSLFIAPGTVRSSDDLEENSSEHKVPS	S	S	D	D	5	2	3	-0.322261	0.187148	1.02728	1.15219	0.262053	STYX	-0.0675565	0.768385	0.813838	0.0526065	CENTER
CLMN_905 906	sp|Q8C5W0|CLMN_MOUSE	Q8C5W0	905 906	0.89	DHVESSLFIAPGTVRSSDDLEENSSEHKVPS HVESSLFIAPGTVRSSDDLEENSSEHKVPSR	S	S	D	D	5	2	3	-0.032969	-0.0348459	0.946773	-0.0980076	-0.13051	STYX	-0.0339074	0.883184	0.239419	0.699379	CENTER
CLMN_925	sp|Q8C5W0|CLMN_MOUSE	Q8C5W0	925	0.995	EENSSEHKVPSRNSHSDSSIYIRRHTNRSLE	S	D	S	S	5	2	3	-0.537417	0.21143	1.07482	0.717453	0.663556	STYX	-0.162993	0.623267	0.81861	0.0353994	CENTER
CLN3_14	sp|Q61124|CLN3_MOUSE	Q61124	14	0.951	__MGSSAGSWRRLEDSEREETDSEPQAPRLD	S	E	R	E	4	2	2	-0.640648	-0.582821	-0.522357	-0.158348	NA	STYX	-0.611734	0.0278333	-0.340352	0.284828	CENTER
CLOCK_427	sp|O08785|CLOCK_MOUSE	O08785	427	0.992	INTVSLKEALERFDHSPTPSASSRSSRKSSH	S	P	T	P	5	2	3	0.578729	-0.0811888	-0.436529	0.0892183	-1.08139	STYX	0.24877	0.444168	-0.476234	0.161368	CENTER
CLOCK_845	sp|O08785|CLOCK_MOUSE	O08785	845	0.974	HQPQQQQQLPRHRTDSLTDPSKVQPQ_____	S	L	T	D	4	2	2	-0.0962896	-0.165208	NA	-1.25393	-0.725346	STYX	-0.130749	0.460485	-0.989637	0.0375321	NR
CLSPN_1265	sp|Q80YR7|CLSPN_MOUSE	Q80YR7	1265	0.994	PSAPRNSRNFVFHTLSPTKAEAAKDSSKPQV	S	P	T	K	5	2	3	0.579238	1.32527	-0.0288488	0.431213	0.0376302	STYX	0.952253	0.0308766	0.146665	0.745391	NR
CLSPN_417	sp|Q80YR7|CLSPN_MOUSE	Q80YR7	417	0.995	LEIEETEKHSDDRPYSPGDRSMSQQESSIPR	S	P	G	D	5	2	3	0.00151414	0.0333223	-0.136708	0.0817956	-0.00695053	STYX	0.0174182	0.880786	-0.0206208	0.806209	CENTER
CLU_1300	sp|Q5SW19|CLU_MOUSE	Q5SW19	1300	0.998	PEPEPEPERAVEDMGSPQTAKEGPSSLNLQG	S	P	Q	T	5	2	3	0.583252	0.423824	-0.07703	0.047363	0.00780453	STYX	0.503538	0.0630998	-0.00728747	0.846242	CENTER
CLUA1_409	sp|Q8R3P7|CLUA1_MOUSE	Q8R3P7	409	1	AKPSRRIRKPEPLDESDNDF___________	S	D	N	D	5	2	3	-0.28063	-0.107528	0.718567	0.440818	0.962381	STYX	-0.194079	0.299063	0.707255	0.0601646	CENTER
CNKR3_383	sp|Q8BMA3|CNKR3_MOUSE	Q8BMA3	383	0.996	HSKSKQPLPVRKGSESPNSFLDQESQRRRFT	S	P	N	S	5	2	3	-0.0603446	-0.00973454	-0.313111	-0.683801	-0.864301	STYX	-0.0350396	0.872534	-0.620404	0.04675	CENTER
CNNM3_706	sp|Q32NY4|CNNM3_MOUSE	Q32NY4	706	0.999	TAGSTNSRPSIPVEESPGRNPGV________	S	P	G	R	5	2	3	-0.344138	-0.0773565	-0.473386	0.0899714	-0.0753901	STYX	-0.210747	0.290453	-0.152935	0.497606	CENTER
CNOT2_165	sp|Q8C5L3|CNOT2_MOUSE	Q8C5L3	165	0.999	GIPSRTNSMSSSGLGSPNRSSPSIICMPKQQ	S	P	N	R	5	2	3	0.230706	0.192226	-0.0626966	0.035058	-0.28261	STYX	0.211466	0.260924	-0.103416	0.587088	CENTER
CNOT2_169 170	sp|Q8C5L3|CNOT2_MOUSE	Q8C5L3	169 170	0.887	RTNSMSSSGLGSPNRSSPSIICMPKQQPSRQ TNSMSSSGLGSPNRSSPSIICMPKQQPSRQP	S	S	P	S	4	2	2	-0.374554	-0.0606163	0.085339	NA	0.124288	STYX	-0.217585	0.294063	0.104814	0.858979	CENTER
CNOT3_299	sp|Q8K0V4|CNOT3_MOUSE	Q8K0V4	299	0.999	DDKKRGRSTDSEVSQSPAKNGSKPVHSNQHP	S	P	A	K	5	2	3	0.828808	0.697954	0.0294383	-0.0184864	0.129198	STYX	0.763381	0.0325573	0.0467165	0.996259	CENTER
CNOT3_527 528 529	sp|Q8K0V4|CNOT3_MOUSE	Q8K0V4	527 528 529	0.893	EAKAAGTLLNGPPQFSTTPEIKAPEPLSSLK AKAAGTLLNGPPQFSTTPEIKAPEPLSSLKS KAAGTLLNGPPQFSTTPEIKAPEPLSSLKSM	S	T	T	P	5	2	3	-0.26412	-0.136029	-0.170398	0.0443327	-0.87333	STYX	-0.200075	0.274528	-0.333132	0.273399	CENTER
CNOT4_324	sp|Q8BT14|CNOT4_MOUSE	Q8BT14	324	0.999	SNPVIPISSSNHSARSPFEGAVTESQSLFSD	S	P	F	E	5	2	3	3.10628	-0.209025	0.135218	-0.0904781	0.699168	STYX	1.44863	0.522161	0.247969	0.559016	NR
CNTRB_63	sp|Q8CB62|CNTRB_MOUSE	Q8CB62	63	0.986	AEATARAQLYLAPTSSPPNEGLDSLAQELSR	S	P	P	N	4	2	2	-0.502995	-0.130886	NA	-0.0858229	0.356546	STYX	-0.316941	0.160887	0.135362	0.811957	CENTER
CNTRL_428	sp|A2AL36|CNTRL_MOUSE	A2AL36	428	1	IRKMVPEGGQLRHEHTPPRVQAPPDLQLEDT	T	P	P	R	5	2	3	6.6299	-6.64	6.64	6.64	5.18982	STYX	-0.005048	0.99982	6.15661	0.00271611	NR
CO039_494	sp|Q3TEI4|CO039_MOUSE	Q3TEI4	494	0.992	KERQSVPQKDARPPSSPPMPVIDNVFSLAPY	S	P	P	M	5	2	3	0.0148084	0.191327	0.00412804	-0.148132	-0.0953464	STYX	0.103068	0.555311	-0.0797833	0.642845	CENTER
CO039_80	sp|Q3TEI4|CO039_MOUSE	Q3TEI4	80	0.997	SWTPYPSLYPTGVAGSPLRGDNLLTNCLLYR	S	P	L	R	5	2	3	0.15661	0.371265	-0.0470322	0.0371936	0.432864	STYX	0.263938	0.207202	0.141009	0.762025	CENTER
CO2A1_1204	sp|P28481|CO2A1_MOUSE	P28481	1204	0.999	PRGRSGETGPVGPPGSPGPPGPPGPPGPGID	S	P	G	P	4	2	2	-0.216186	-0.397166	NA	-0.313333	0.57573	STYX	-0.306676	0.129065	0.131198	0.886051	CENTER
CO2A1_400	sp|P28481|CO2A1_MOUSE	P28481	400	0.998	PEGAQGSRGEPGNPGSPGPAGASGNPGTDGI	S	P	G	P	5	2	3	0.11072	-0.046414	0.786306	0.618922	0.410744	STYX	0.0321529	0.821594	0.605324	0.0912858	CENTER
COASY_177	sp|Q9DBL7|COASY_MOUSE	Q9DBL7	177	1	LEPPNALLPSTIRPASPVARSPRQPVRGYHR	S	P	V	A	5	2	3	0.450341	0.128723	-0.352758	0.0826767	-1.98143	STYX	0.289532	0.201028	-0.750504	0.156059	CENTER
COBL1_1091 1092	sp|Q3UMF0|COBL1_MOUSE	Q3UMF0	1091 1092	0.898	SLPLVFPKPMTLRAETSPPPVAAKPVALPGS LPLVFPKPMTLRAETSPPPVAAKPVALPGSQ	T	S	P	P	5	2	3	-0.148075	-0.0603557	-1.03607	-1.27212	-0.583532	STYX	-0.104215	0.562199	-0.963908	0.0122963	NR
COBL1_1214 1215	sp|Q3UMF0|COBL1_MOUSE	Q3UMF0	1214 1215	0.877	VLTPADGPSFTLKRQSSLTFQSSDPEHVRQS LTPADGPSFTLKRQSSLTFQSSDPEHVRQSL	S	S	L	T	5	2	3	-0.00766073	0.0767943	-0.511791	-0.493311	-0.497803	STYX	0.0345668	0.802303	-0.500968	0.0689012	CENTER
COBL1_359	sp|Q3UMF0|COBL1_MOUSE	Q3UMF0	359	1	MPTSQGAAQGQERRASCVERSTSVDDTDKSS	S	C	V	E	5	2	3	0.944454	-1.31094	-0.0931455	-1.15243	-0.322361	STYX	-0.183243	0.926958	-0.522644	0.125616	CENTER
COBL1_72	sp|Q3UMF0|COBL1_MOUSE	Q3UMF0	72	1	QSRKTKGKAPLPPAETKGTDVSSAEDPVEST	T	K	G	T	4	2	2	-0.353084	-0.462092	-0.399141	NA	0.565542	STYX	-0.407588	0.0638863	0.0832007	0.978698	CENTER
COBL1_896 897	sp|Q3UMF0|COBL1_MOUSE	Q3UMF0	896 897	0.893	PKPSSGTERHLHRTLSSPTGTETNPPKAPRV KPSSGTERHLHRTLSSPTGTETNPPKAPRVT	S	S	P	T	5	2	3	-0.287785	0.180305	-0.938074	-1.17524	-1.22175	STYX	-0.05374	0.804392	-1.11169	0.00659919	NR
COE3_468	sp|O08791|COE3_MOUSE	O08791	468	0.996	QANDQVGYSRNTSSVSPRGYVPSSTPQQSNY	S	P	R	G	4	2	2	0.748578	-0.333032	0.80438	NA	0.0850112	STYX	0.207773	0.811541	0.444696	0.353804	CENTER
COEA1_1665	sp|Q80X19|COEA1_MOUSE	Q80X19	1665	0.967	IRTIQGPPGEPGRPGSPGTPGEQGPPGTPGF	S	P	G	T	4	2	2	-0.270113	-0.160839	0.270305	0.233392	NA	STYX	-0.215476	0.239737	0.251849	0.544396	CENTER
COEA1_1729	sp|Q80X19|COEA1_MOUSE	Q80X19	1729	0.99	GPPGPAGPSGESRPGSPGPPGSPGPRGPPGH	S	P	G	P	4	2	2	-0.348145	0.163207	0.527902	0.212057	NA	STYX	-0.0924691	0.698336	0.369979	0.383478	CENTER
COF1_156	sp|P18760|COF1_MOUSE	P18760	156	0.995	EEVKDRCTLAEKLGGSAVISLEGKPL_____	S	A	V	I	5	2	3	-0.500823	0.104508	0.148156	-0.139982	0.0959923	STYX	-0.198158	0.480976	0.0347221	0.967966	CENTER
COF1_23 24 25	sp|P18760|COF1_MOUSE	P18760	23 24 25	0.899	SDGVIKVFNDMKVRKSSTPEEVKKRKKAVLF DGVIKVFNDMKVRKSSTPEEVKKRKKAVLFC GVIKVFNDMKVRKSSTPEEVKKRKKAVLFCL	S	S	T	P	5	2	3	0.967733	-0.737111	0.271186	0.589568	0.381998	STYX	0.115311	0.976341	0.414251	0.226174	CENTER
COG2_665	sp|Q921L5|COG2_MOUSE	Q921L5	665	0.998	KKMEESLKRLKQARRSPATNPVSSSGGGMSD	S	P	A	T	5	2	3	0.351201	0.0191675	-0.0599518	-0.0451585	-0.281075	STYX	0.185185	0.386542	-0.128728	0.523173	CENTER
COG3_204	sp|Q8CI04|COG3_MOUSE	Q8CI04	204	0.952	LSYFNELETINTKLNSPTLSVNSEGFIPMLA	S	P	T	L	4	2	2	0.201205	-0.364819	-0.128292	-0.300088	NA	STYX	-0.0818072	0.738045	-0.21419	0.439682	CENTER
COG3_525	sp|Q8CI04|COG3_MOUSE	Q8CI04	525	0.972	VRLEEGEASGLRKSGSTDSLNPRPQTTISPA	S	T	D	S	4	2	2	0.749329	0.0400276	NA	0.597101	0.206352	STYX	0.394679	0.226635	0.401727	0.352139	CENTER
COG3_525 526	sp|Q8CI04|COG3_MOUSE	Q8CI04	525 526	0.899	VRLEEGEASGLRKSGSTDSLNPRPQTTISPA RLEEGEASGLRKSGSTDSLNPRPQTTISPAD	S	T	D	S	5	2	3	-0.242217	-0.00126462	-0.0516598	0.536175	0.42648	STYX	-0.121741	0.523113	0.303665	0.413965	CENTER
COGA1_1037	sp|Q8BLX7|COGA1_MOUSE	Q8BLX7	1037	1	MPGQRGEEGPPGMRGSPGPPGPIGLQGERGL	S	P	G	P	5	2	3	0.309534	0.0106919	0.224124	0.180056	0.352065	STYX	0.160113	0.433653	0.252082	0.465955	CENTER
COGA1_1178	sp|Q8BLX7|COGA1_MOUSE	Q8BLX7	1178	0.999	EKGSEGIRGPSGLPGSPGPPGPPGIQGPAGL	S	P	G	P	5	2	3	0.0345611	0.134427	0.329753	0.489737	1.07873	STYX	0.084494	0.597088	0.632741	0.0998511	CENTER
COGA1_1390	sp|Q8BLX7|COGA1_MOUSE	Q8BLX7	1390	0.999	PIGPPGPAGERGHPGSPGPAGNPGLPGLPGS	S	P	G	P	5	2	3	-0.0631021	-0.0678967	0.532611	0.602971	0.743946	STYX	-0.0654994	0.7305	0.626509	0.0793814	CENTER
COGA1_624	sp|Q8BLX7|COGA1_MOUSE	Q8BLX7	624	0.999	EKGSFGDTGPAGVPGSPGPVGPAGIKGAKGE	S	P	G	P	5	2	3	0.42494	0.474311	0.122407	0.192548	0.128379	STYX	0.449626	0.07518	0.147778	0.708627	CENTER
COIL_122	sp|Q5SU73|COIL_MOUSE	Q5SU73	122	0.998	RKAKKRAFKLMEDEETDQGYKSLKKHCKRQE	T	D	Q	G	5	2	3	0.473984	0.291634	-0.00619247	0.349116	0.127503	STYX	0.382809	0.105937	0.156809	0.701128	CENTER
COIL_146	sp|Q5SU73|COIL_MOUSE	Q5SU73	146	0.998	KHCKRQEDSGQNEKASDLETKLLPDETGRTK	S	D	L	E	5	2	3	1.13244	0.253656	-0.0334905	0.234364	1.10085	STYX	0.693048	0.0736802	0.433909	0.331147	CENTER
COIL_171	sp|Q5SU73|COIL_MOUSE	Q5SU73	171	0.996	ETGRTKSKKKSKVTGSPAEEDEEETKKKSSK	S	P	A	E	5	2	3	1.20744	0.214012	0.160657	0.415808	0.588681	STYX	0.710725	0.0842838	0.388382	0.265664	CENTER
COPA_173	sp|Q8CIE6|COPA_MOUSE	Q8CIE6	173	0.999	TVRVWDISGLRKKNLSPGAVESDVRGITGVD	S	P	G	A	5	2	3	-0.0661651	0.136836	0.0838923	-0.278749	0.0372823	STYX	0.0353354	0.816783	-0.0525248	0.723267	CENTER
COPA_914 915	sp|Q8CIE6|COPA_MOUSE	Q8CIE6	914 915	0.897	SGSAEDGFFVPPTKGTSPTQIWCNNSQLPVD GSAEDGFFVPPTKGTSPTQIWCNNSQLPVDH	T	S	P	T	4	2	2	-0.211665	0.0927102	NA	-0.591326	0.652433	STYX	-0.0594773	0.769933	0.0305535	0.935835	CENTER
COPD_493	sp|Q5XJY5|COPD_MOUSE	Q5XJY5	493	0.999	YCNIQVTKVTQVDGNSPVRFSTETTFLVDKY	S	P	V	R	5	2	3	0.27086	0.0375005	0.81594	0.39976	0.353738	STYX	0.15418	0.418994	0.523146	0.14292	CENTER
COPD_74	sp|Q5XJY5|COPD_MOUSE	Q5XJY5	74	0.999	QPMEKLYMVLITTKNSNILEDLETLRLFSRV	S	N	I	L	4	2	2	-0.0461396	-0.0793231	NA	0.919245	0.841641	STYX	-0.0627313	0.741359	0.880443	0.0665891	NR
COPG1_593	sp|Q9QZE5|COPG1_MOUSE	Q9QZE5	593	0.994	SVPLATTPMAEQRPESTATAAVKQPEKVAAT	S	T	A	T	5	2	3	-0.119805	-0.0763895	0.834912	0.52912	0.992438	STYX	-0.0980975	0.582875	0.78549	0.0414848	CENTER
COPRS_16	sp|Q9CQ13|COPRS_MOUSE	Q9CQ13	16	0.992	MDPQAATGRGPGERSSQEAPSAEAGFATADL	S	Q	E	A	5	2	3	0.25828	0.552246	0.442844	-0.104006	0.766194	STYQ	0.405263	0.105089	0.368344	0.348798	CENTER
COQ9_81	sp|Q8K1Z0|COQ9_MOUSE	Q8K1Z0	81	0.998	QGPEFSRPPPRYTDQSGEEEEDYESEEQLQH	S	G	E	E	5	2	3	0.181225	0.00813467	0.132067	0.310905	0.124771	STYX	0.0946799	0.58303	0.189248	0.607333	CENTER
COR1A_418	sp|O89053|COR1A_MOUSE	O89053	418	0.999	ELRVNRGLDSARRRATPEPSGTPSSDTVSRL	T	P	E	P	5	2	3	-0.115923	0.486111	-0.983197	-1.60262	-0.653521	STYX	0.185094	0.552974	-1.07978	0.0103071	NR
COR1B_413	sp|Q9WUM3|COR1B_MOUSE	Q9WUM3	413	0.994	PSKQRDLKVSRRNVLSDSRPASYSRSGASTA	S	D	S	R	5	2	3	-0.514108	0.467429	-0.17951	-0.38809	-0.984273	STYX	-0.0233391	0.894567	-0.517291	0.0976951	CENTER
CORO7_454	sp|Q9D2V7|CORO7_MOUSE	Q9D2V7	454	0.976	SSLGPSLSSTSGIGTSPSQRSLQSLLGPSSK	S	P	S	Q	5	2	3	0.159277	-0.707677	-0.611984	-0.349574	-0.100493	STYX	-0.2742	0.492397	-0.354017	0.18186	CENTER
CORO7_456	sp|Q9D2V7|CORO7_MOUSE	Q9D2V7	456	0.997	LGPSLSSTSGIGTSPSQRSLQSLLGPSSKFR	S	Q	R	S	5	2	3	-0.668619	-0.284241	-0.199176	-0.429678	-0.065659	STYQ	-0.47643	0.0615195	-0.231504	0.324728	CENTER
CORO7_459	sp|Q9D2V7|CORO7_MOUSE	Q9D2V7	459	0.999	SLSSTSGIGTSPSQRSLQSLLGPSSKFRHTQ	S	L	Q	S	5	2	3	-0.628974	0.395059	-1.06614	-1.71322	-0.954918	STYX	-0.116958	0.784601	-1.24476	0.00605698	NR
COTL1_141	sp|Q9CQI6|COTL1_MOUSE	Q9CQI6	141	0.999	RSELKKAGGANYDAQSE______________	S	E	_	_	5	2	3	0.0103934	-0.0861635	-0.327827	-0.43573	-0.519185	STYX	-0.0378851	0.853865	-0.427581	0.105386	CENTER
COX8C_33	sp|A6H666|COX8C_MOUSE	A6H666	33	0.999	LFSKPGHPGRLSHSESPQKKILSPTESAVGI	S	P	Q	K	4	2	2	2.52046	-1.47006	NA	2.38378	3.26294	STYX	0.525203	0.997979	2.82336	0.0150497	NR
CP046_206	sp|Q8BHB7|CP046_MOUSE	Q8BHB7	206	0.995	MPETVSSKAGRNPSGSPEQGLSTPDSLAAKA	S	P	E	Q	5	2	3	-0.331443	-0.0568194	0.516808	0.768891	0.350614	STYX	-0.194131	0.332488	0.545438	0.124342	CENTER
CP046_77 78	sp|Q8BHB7|CP046_MOUSE	Q8BHB7	77 78	0.898	AISTGWEEAVHGWGRTSPTACIWSKKKVKRG ISTGWEEAVHGWGRTSPTACIWSKKKVKRGR	T	S	P	T	5	2	3	-0.157784	-0.0247397	0.78113	0.63412	0.849789	STYX	-0.091262	0.617864	0.755013	0.0430886	CENTER
CP070_373	sp|Q922R1|CP070_MOUSE	Q922R1	373	0.983	LGHPVEKPVVLHRSSSPNNTNPFGSTFCFGL	S	P	N	N	4	2	2	-0.263993	0.119289	0.325237	NA	0.768488	STYX	-0.0723522	0.732617	0.546862	0.215413	CENTER
CP086_45	sp|Q9D4A5|CP086_MOUSE	Q9D4A5	45	1	PGTEECLVPAHETCRSPGEDKCPVGHSLEPE	S	P	G	E	4	2	2	0.220914	-0.32662	0.735484	1.20407	NA	STYX	-0.0528528	0.813462	0.969777	0.0588751	NR
CP110_368	sp|Q7TSH4|CP110_MOUSE	Q7TSH4	368	0.951	KSLKGPYAKLPSPEPSMSPTMHRRHSRSASA	S	M	S	P	4	2	2	0.0511899	0.0722929	NA	0.11272	0.047042	STYX	0.0617414	0.68241	0.079881	0.917716	CENTER
CP110_370	sp|Q7TSH4|CP110_MOUSE	Q7TSH4	370	0.996	LKGPYAKLPSPEPSMSPTMHRRHSRSASACQ	S	P	T	M	5	2	3	0.297297	0.3327	0.114495	0.0624225	0.160278	STYX	0.314999	0.140477	0.112399	0.805955	CENTER
CP110_398	sp|Q7TSH4|CP110_MOUSE	Q7TSH4	398	1	ACQILINNPVNACELSPKGKEEAVDRTAPAA	S	P	K	G	5	2	3	0.0600449	0.917076	0.443781	0.234121	0.369545	STYX	0.48856	0.189312	0.349149	0.300877	CENTER
CP131_114	sp|Q62036|CP131_MOUSE	Q62036	114	0.989	LMLFEGSTSGRRRVASLSKASSEKEATWNVL	S	L	S	K	5	2	3	-0.106168	-0.180298	-0.403701	-0.69388	-0.546485	STYX	-0.143233	0.420745	-0.548022	0.0569901	CENTER
CP131_144	sp|Q62036|CP131_MOUSE	Q62036	144	0.998	LDEQPRGLALPASAQSPSTLDSALGPRRKEC	S	P	S	T	5	2	3	-0.377322	0.157736	0.400629	0.355359	0.41711	STYX	-0.109793	0.656262	0.391033	0.243926	CENTER
CP131_222	sp|Q62036|CP131_MOUSE	Q62036	222	1	LNNIVKAAAREGGEGSDLGKPRKNLSSASQS	S	D	L	G	4	2	2	0.216099	-0.134759	NA	0.176292	0.704476	STYX	0.0406697	0.851482	0.440384	0.324557	CENTER
CP131_47	sp|Q62036|CP131_MOUSE	Q62036	47	0.994	RPGSASATRSIFRSMSVATGSEPRKKALEAT	S	V	A	T	5	2	3	0.0608747	-0.117439	-0.364349	-0.145908	-0.603549	STYX	-0.0282823	0.895546	-0.371269	0.16127	CENTER
CP131_473	sp|Q62036|CP131_MOUSE	Q62036	473	0.999	PLPHPKAYHKDRYAWTDEEEDANSLTADNLE	T	D	E	E	4	2	2	-0.241687	0.0651264	NA	0.514781	1.23222	STYX	-0.0882804	0.657482	0.873503	0.0894624	NR
CP131_78	sp|Q62036|CP131_MOUSE	Q62036	78	0.964	GPGGPRAINNLRRSNSTTQVNQSWTGSPRPA	S	T	T	Q	4	2	2	-0.300684	0.137144	0.289943	0.334004	NA	STYX	-0.0817701	0.715489	0.311974	0.444641	CENTER
CP131_78 79 80	sp|Q62036|CP131_MOUSE	Q62036	78 79 80	0.896	GPGGPRAINNLRRSNSTTQVNQSWTGSPRPA PGGPRAINNLRRSNSTTQVNQSWTGSPRPAE GGPRAINNLRRSNSTTQVNQSWTGSPRPAEP	S	T	T	Q	4	2	2	0.269562	-0.240533	NA	0.137425	0.590449	STYX	0.0145147	0.986306	0.363937	0.40923	CENTER
CP135_439	sp|Q6P5D4|CP135_MOUSE	Q6P5D4	439	0.996	VERMRLEHGIKRRDKSPSRLDTFLKGIEEER	S	P	S	R	5	2	3	0.0893499	0.617048	0.307273	0.189102	0.230821	STYX	0.353199	0.195727	0.242399	0.480762	CENTER
CP4X1_480	sp|Q6A152|CP4X1_MOUSE	Q6A152	480	0.997	AIALILLHFQVAPDLTRPPAFSSHTVLRPKH	T	R	P	P	4	2	2	0.807277	-0.221513	0.375079	0.306287	NA	STYX	0.292882	0.633811	0.340683	0.404415	CENTER
CPEB2_21	sp|Q812E0|CPEB2_MOUSE	Q812E0	21	0.999	QQPPAAAPQQPQSRRSPVSPQLQQQHQAAAA	S	P	V	S	5	2	3	0.504349	-0.105526	0.326356	0.189442	0.101234	STYX	0.199411	0.521137	0.205677	0.568627	CENTER
CPEB2_24	sp|Q812E0|CPEB2_MOUSE	Q812E0	24	0.998	PAAAPQQPQSRRSPVSPQLQQQHQAAAAAFL	S	P	Q	L	5	2	3	-0.223224	-0.188668	0.355183	-0.401802	-0.266784	STYX	-0.205946	0.254629	-0.104468	0.585103	CENTER
CPEB3_194	sp|Q7TN99|CPEB3_MOUSE	Q7TN99	194	0.999	QPAQPPQAQPSQQRRSPASPSQAPYAQRSAA	S	P	A	S	5	2	3	-0.314312	-0.0685482	0.313284	0.297727	0.0727561	STYX	-0.19143	0.326848	0.227923	0.518023	CENTER
CPEB3_197	sp|Q7TN99|CPEB3_MOUSE	Q7TN99	197	0.993	QPPQAQPSQQRRSPASPSQAPYAQRSAAAYG	S	P	S	Q	5	2	3	-0.08353	-0.026806	0.363965	-0.01499	0.107594	STYX	-0.055168	0.776826	0.15219	0.714196	CENTER
CPEB3_443	sp|Q7TN99|CPEB3_MOUSE	Q7TN99	443	0.962	FLDDSHGDQALSSGLSSPTRCQNGERVERYS	S	S	P	T	5	2	3	-0.874607	-0.511301	0.380832	0.568612	0.304082	STYX	-0.692954	0.0264647	0.417842	0.219899	CENTER
CPEB3_443 444	sp|Q7TN99|CPEB3_MOUSE	Q7TN99	443 444	0.892	FLDDSHGDQALSSGLSSPTRCQNGERVERYS LDDSHGDQALSSGLSSPTRCQNGERVERYSR	S	S	P	T	5	2	3	0.203002	-0.178591	0.373415	0.345613	0.467802	STYX	0.0122056	0.965482	0.39561	0.239052	CENTER
CPEB3_444	sp|Q7TN99|CPEB3_MOUSE	Q7TN99	444	0.991	LDDSHGDQALSSGLSSPTRCQNGERVERYSR	S	P	T	R	5	2	3	-0.806959	-0.289826	0.444744	0.304825	0.575145	STYX	-0.548392	0.0544685	0.441571	0.196185	CENTER
CPEB4_97	sp|Q7TN98|CPEB4_MOUSE	Q7TN98	97	0.927	SQQQEQQDPLEKQQLSPSPGQEAGILPETEK	S	P	S	P	4	2	2	0.112135	0.220977	-0.076549	-0.171111	NA	STYX	0.166556	0.355496	-0.12383	0.609901	CENTER
CPEB4_99	sp|Q7TN98|CPEB4_MOUSE	Q7TN98	99	0.998	QQEQQDPLEKQQLSPSPGQEAGILPETEKAK	S	P	G	Q	5	2	3	-0.171254	0.131623	-0.191977	-0.147163	-0.0134501	STYX	-0.0198158	0.928926	-0.11753	0.546297	CENTER
CPSF1_754	sp|Q9EPU4|CPSF1_MOUSE	Q9EPU4	754	0.998	DDEEEMLYGDSSALFSPSKEEARRSSQPPAD	S	P	S	K	5	2	3	0.29316	-0.0634501	0.199479	0.231598	0.445777	STYX	0.114855	0.586898	0.292285	0.394861	CENTER
CPSF1_763 764	sp|Q9EPU4|CPSF1_MOUSE	Q9EPU4	763 764	0.892	DSSALFSPSKEEARRSSQPPADRDPAPFKAD SSALFSPSKEEARRSSQPPADRDPAPFKADP	S	S	Q	P	5	2	3	-0.124486	-0.0059906	0.115412	0.192633	0.426411	STYX	-0.0652381	0.728216	0.244818	0.493459	CENTER
CPSF1_764	sp|Q9EPU4|CPSF1_MOUSE	Q9EPU4	764	0.994	SSALFSPSKEEARRSSQPPADRDPAPFKADP	S	Q	P	P	4	2	2	0.0663643	0.172579	0.457858	0.323188	NA	STYQ	0.119472	0.48322	0.390523	0.341601	CENTER
CPSF3_681	sp|Q9QXK7|CPSF3_MOUSE	Q9QXK7	681	0.999	REMVELAAQRLYEALTPVH____________	T	P	V	H	5	2	3	0.0557969	0.390477	-0.0600803	1.49969	0.558058	STYX	0.223137	0.307574	0.66589	0.180512	CENTER
CPSF6_407	sp|Q6NVF9|CPSF6_MOUSE	Q6NVF9	407	0.997	RGDYGPPGREMDTARTPLSEAEFEEIMNRNR	T	P	L	S	5	2	3	-0.562187	0.158757	-0.333926	-0.12294	0.0534713	STYX	-0.201715	0.538534	-0.134465	0.514844	CENTER
CPSF7_203	sp|Q8BTV2|CPSF7_MOUSE	Q8BTV2	203	0.998	RAHSRDSSDSADGRATPSENLVPSSARVDKP	T	P	S	E	5	2	3	-0.0125121	-0.0310184	-0.176083	-0.289157	0.162099	STYX	-0.0217653	0.937964	-0.101047	0.593423	CENTER
CPSF7_46 47 48 49	sp|Q8BTV2|CPSF7_MOUSE	Q8BTV2	46 47 48 49	0.899	YDDVLTAASQPSDDRSSSTEPPPPVRQEPAP DDVLTAASQPSDDRSSSTEPPPPVRQEPAPK DVLTAASQPSDDRSSSTEPPPPVRQEPAPKP VLTAASQPSDDRSSSTEPPPPVRQEPAPKPN	S	S	S	T	5	2	3	0.237739	0.113008	0.609862	0.367756	0.839243	STYX	0.175374	0.339384	0.60562	0.0948222	CENTER
CPSF7_48	sp|Q8BTV2|CPSF7_MOUSE	Q8BTV2	48	0.986	DVLTAASQPSDDRSSSTEPPPPVRQEPAPKP	S	T	E	P	5	2	3	0.121343	0.0605685	0.621199	0.640526	1.18363	STYX	0.0909558	0.570274	0.815119	0.0397672	CENTER
CQ047_149	sp|Q5ND19|CQ047_MOUSE	Q5ND19	149	0.998	IQTMSSHLAGVHRNVSPVREESTRRTETRPG	S	P	V	R	5	2	3	-0.0151409	-0.141393	1.08347	1.48613	0.855891	STYX	-0.0782671	0.671131	1.14183	0.0120905	NR
CQ047_360	sp|Q5ND19|CQ047_MOUSE	Q5ND19	360	0.996	KQSTQPPHRVTCRTVSEGSYKSPLYPELSTK	S	E	G	S	4	2	2	-0.147283	-0.281943	NA	0.941451	1.20931	STYX	-0.214613	0.245957	1.07538	0.0421957	NR
CQ047_57	sp|Q5ND19|CQ047_MOUSE	Q5ND19	57	0.998	GYYSSSQRATAAVSLSPPPLPSQRRAEATST	S	P	P	P	5	2	3	0.0367854	-0.271102	0.115472	0.0961856	0.249518	STYX	-0.117158	0.558864	0.153725	0.6939	CENTER
CQ050_180	sp|Q8C1R3|CQ050_MOUSE	Q8C1R3	180	0.998	AEATGNSELIDSQPPSPQCSKLFYL______	S	P	Q	C	5	2	3	0.0951542	-0.1726	0.302189	0.174703	0.20968	STYX	-0.0387231	0.84963	0.228857	0.510706	CENTER
CQ050_68	sp|Q8C1R3|CQ050_MOUSE	Q8C1R3	68	0.994	DSRDAEEREARSVSYSPLRQESSSQQVALLR	S	P	L	R	4	2	2	-0.242836	0.0203432	NA	0.534618	1.00117	STYX	-0.111246	0.56562	0.767891	0.105503	CENTER
CQ098_136	sp|Q9DAQ5|CQ098_MOUSE	Q9DAQ5	136	1	AITTGLNGRFGYRRNTPALRQHTSVFGEVTP	T	P	A	L	5	2	3	0.471326	-0.0777381	3.02624	1.26954	1.17153	STYX	0.196794	0.486457	1.82244	0.00583915	NR
CR025_145	sp|Q8BH50|CR025_MOUSE	Q8BH50	145	0.996	GVSGATVGRKSRRSRSESETSTMAAKKNRQS	S	E	S	E	5	2	3	0.0379464	0.243329	-0.757177	-0.725307	-0.719518	STYX	0.140638	0.448536	-0.734001	0.0223289	CENTER
CR025_147	sp|Q8BH50|CR025_MOUSE	Q8BH50	147	0.996	SGATVGRKSRRSRSESETSTMAAKKNRQSSD	S	E	T	S	5	2	3	0.00477486	0.201531	-1.16935	-1.19926	-1.37025	STYX	0.103153	0.561289	-1.24629	0.00490813	NR
CR025_34	sp|Q8BH50|CR025_MOUSE	Q8BH50	34	0.998	PPKASEQETAKEEDGSVELESQVQKDGVADS	S	V	E	L	4	2	2	0.395946	0.0451183	0.418771	-0.106119	NA	STYX	0.220532	0.319079	0.156326	0.780292	CENTER
CR025_66	sp|Q8BH50|CR025_MOUSE	Q8BH50	66	0.998	VLSSMPCLLMELRRDSSESQLASTESDKPTT	S	S	E	S	5	2	3	0.156155	-0.3519	-0.869211	-0.739916	-0.116925	STYX	-0.0978726	0.681584	-0.575351	0.0730195	CENTER
CR025_67	sp|Q8BH50|CR025_MOUSE	Q8BH50	67	0.996	LSSMPCLLMELRRDSSESQLASTESDKPTTG	S	E	S	Q	5	2	3	-0.0783481	0.035603	-0.404365	-0.575942	0.230831	STYX	-0.0213725	0.932952	-0.249825	0.336097	CENTER
CR1L_454	sp|Q64735|CR1L_MOUSE	Q64735	454	0.998	EKYKEVGIHLNYKEDSCVRLQSLLTSQENSS	S	C	V	R	5	2	3	0.0434542	-0.383576	-1.7807	-1.093	-0.329826	STYX	-0.170061	0.450966	-1.06784	0.0191858	NR
CR1L_477	sp|Q64735|CR1L_MOUSE	Q64735	477	0.996	LTSQENSSTTSPARNSLTQEVS_________	S	L	T	Q	5	2	3	0.489619	-0.134258	-0.288927	-0.223442	-0.862396	STYX	0.177681	0.587906	-0.458255	0.119487	CENTER
CRBG3_149	sp|Q80W49|CRBG3_MOUSE	Q80W49	149	0.989	VLSSEVSPGHHGSSKSRESANQPSSVLSLLQ	S	R	E	S	4	2	2	-0.104147	-0.0128871	NA	0.0151775	1.41583	STYX	-0.0585168	0.759458	0.715502	0.277124	CENTER
CRBG3_310	sp|Q80W49|CRBG3_MOUSE	Q80W49	310	0.992	PVSKYFRVQDHAGRLSPYVENVDKQTLKCNP	S	P	Y	V	5	2	3	0.284444	-0.0450997	0.462769	0.98097	1.3006	STYX	0.119672	0.559848	0.91478	0.0311643	NR
CRBG3_82	sp|Q80W49|CRBG3_MOUSE	Q80W49	82	0.977	TSSMPGLACERSESRTDLVHHFEKEGKLGEA	T	D	L	V	4	2	2	-0.299129	-0.0292077	0.918726	NA	0.714641	STYX	-0.164168	0.407047	0.816684	0.081958	CENTER
CRBG3_937	sp|Q80W49|CRBG3_MOUSE	Q80W49	937	0.999	SKASHTCLDVIGGRDTPGAKVALWTEHGQLR	T	P	G	A	5	2	3	0.279259	0.00332955	0.707123	0.840444	0.868716	STYX	0.141294	0.473026	0.805428	0.0340873	CENTER
CREB1_271	sp|Q01147|CREB1_MOUSE	Q01147	271	0.988	TAPTSTIAPGVVMASSPALPTQPAEEAARKR	S	P	A	L	5	2	3	-0.576758	-0.160422	-0.260337	-0.413346	-0.225764	STYX	-0.36859	0.124338	-0.299815	0.216102	CENTER
CREL2_64	sp|Q9CYA0|CREL2_MOUSE	Q9CYA0	64	0.99	KNFGGGNTAWEEKTLSKYEFSEIRLLEIMEG	S	K	Y	E	5	2	3	0.110566	0.224853	0.667107	0.444417	0.715278	STYX	0.167709	0.353565	0.608934	0.0873698	CENTER
CREM_142 143	sp|P27699|CREM_MOUSE	P27699	142 143	0.899	ILSRRPSYRKILNELSSDVPGIPKIEEEKSE LSRRPSYRKILNELSSDVPGIPKIEEEKSEE	S	S	D	V	5	2	3	-0.11556	-0.0797009	0.472212	-0.247583	0.777302	STYX	-0.0976302	0.585117	0.333977	0.425259	CENTER
CREM_284	sp|P27699|CREM_MOUSE	P27699	284	0.999	RAPTTALPQGVVMAASPGSLHSPQQLAEEAT	S	P	G	S	5	2	3	-0.310752	-0.0275654	0.262593	0.237933	0.289559	STYX	-0.169159	0.398064	0.263362	0.434568	CENTER
CRIS2_57	sp|P16563|CRIS2_MOUSE	P16563	57	0.997	VNKHNELRRSVNPTGSDILKMEWSIQATTNA	S	D	I	L	4	2	2	-0.256712	-0.12986	NA	0.14415	0.472537	STYX	-0.193286	0.289068	0.308344	0.473672	CENTER
CRK_125	sp|Q64010|CRK_MOUSE	Q64010	125	1	DTTTLIEPVARSRQGSGVILRQEEAEYVRAL	S	G	V	I	5	2	3	-0.131816	0.251971	-0.471916	-0.574954	-0.634543	STYX	0.0600776	0.793959	-0.560471	0.051434	CENTER
CRK_40 41 42 43	sp|Q64010|CRK_MOUSE	Q64010	40 41 42 43	0.893	ALLQGQRHGVFLVRDSSTSPGDYVLSVSENS LLQGQRHGVFLVRDSSTSPGDYVLSVSENSR LQGQRHGVFLVRDSSTSPGDYVLSVSENSRV QGQRHGVFLVRDSSTSPGDYVLSVSENSRVS	S	S	T	S	5	2	3	-0.220524	-0.179009	-0.538752	-0.578856	-0.43745	STYX	-0.199767	0.267618	-0.518353	0.0635591	CENTER
CRK_41	sp|Q64010|CRK_MOUSE	Q64010	41	0.968	LLQGQRHGVFLVRDSSTSPGDYVLSVSENSR	S	T	S	P	4	2	2	-0.40739	-0.146019	-0.380967	-0.842344	NA	STYX	-0.276705	0.175008	-0.611655	0.108016	CENTER
CRKL_107	sp|P47941|CRKL_MOUSE	P47941	107	0.995	YLDTTTLIEPAPRYPSPPVGSVSAPNLPTAE	S	P	P	V	5	2	3	-0.0124834	-0.133214	-0.206945	-0.207078	0.124905	STYX	-0.0728488	0.694674	-0.0963728	0.597194	CENTER
CROCC_1469	sp|Q8CJ40|CROCC_MOUSE	Q8CJ40	1469	0.996	PAREAPAGGSGDGLSSPSPLEYSPRSQPPSP	S	P	S	P	4	2	2	-0.952505	-0.447014	NA	0.0712068	0.17588	STYX	-0.699759	0.0299877	0.123544	0.814512	CENTER
CROCC_501	sp|Q8CJ40|CROCC_MOUSE	Q8CJ40	501	0.994	LRGFSGQRTPTPPRHSPGRGRSPRRGLSPAC	S	P	G	R	5	2	3	-0.237116	0.54642	-0.175099	-0.417165	-0.477245	STYX	0.154652	0.745274	-0.356503	0.163359	CENTER
CRTC1_565	sp|Q68ED7|CRTC1_MOUSE	Q68ED7	565	0.998	GHGGIPNIILTVTGESPPSLSKELSSTLAGV	S	P	P	S	5	2	3	0.161946	0.289933	-0.799991	-0.520015	-0.30748	STYX	0.225939	0.244631	-0.542495	0.0656938	CENTER
CRTC1_64	sp|Q68ED7|CRTC1_MOUSE	Q68ED7	64	0.998	QYLQLGPSRGQYYGGSLPNVNQIGSSSVDLA	S	L	P	N	4	2	2	-0.438523	-0.0327938	NA	-0.442055	-0.0972947	STYX	-0.235658	0.299063	-0.269675	0.369354	CENTER
CRTC2_434	sp|Q3U182|CRTC2_MOUSE	Q3U182	434	0.997	ASTPGASPRHRRVPLSPLSLPAGPADARRSQ	S	P	L	S	5	2	3	-0.0765417	0.249077	0.0269888	-0.101573	0.127061	STYX	0.0862674	0.672116	0.0174924	0.917203	CENTER
CRTC2_457	sp|Q3U182|CRTC2_MOUSE	Q3U182	457	0.999	PADARRSQQQLPKQFSPTMSPTLSSITQGVP	S	P	T	M	5	2	3	0.274106	-0.220337	-0.411544	-0.719723	-0.516449	STYX	0.026884	0.942084	-0.549239	0.0572728	CENTER
CRTC3_329	sp|Q91X84|CRTC3_MOUSE	Q91X84	329	0.999	THLGIRTSSGLQSSRSNPSIQATLSKMALSS	S	N	P	S	5	2	3	-0.130417	-0.391475	-1.74632	-2.11095	-1.58219	STYX	-0.260946	0.198031	-1.81315	0.00309079	NR
CRTC3_370	sp|Q91X84|CRTC3_MOUSE	Q91X84	370	0.999	ANASALHPSLRLFSLSNPSLSTTNLSGPSRR	S	N	P	S	5	2	3	0.0868704	-0.360936	-0.161898	-1.34776	-0.705565	STYX	-0.137033	0.551093	-0.738409	0.0504376	CENTER
CRY2_557	sp|Q9R194|CRY2_MOUSE	Q9R194	557	0.999	SISNTGPRALSSGPASPKRKLEAAEEPPGEE	S	P	K	R	5	2	3	0.0714372	0.231602	-0.524015	-0.580317	-0.537696	STYX	0.15152	0.404948	-0.547343	0.0540707	CENTER
CS057_579	sp|Q6DIA7|CS057_MOUSE	Q6DIA7	579	0.999	STHRDLEAFKRRKTKSLPYLTKGLGSLPRGD	S	L	P	Y	4	2	2	-0.318733	0.152865	NA	-0.00139372	0.492961	STYX	-0.0829342	0.717927	0.245784	0.601545	CENTER
CS071_85	sp|A6H6Q4|CS071_MOUSE	A6H6Q4	85	0.974	SEPGDAWYKLPRALDTPYREAHTRWHGCFQS	T	P	Y	R	4	2	2	-0.437631	0.0322674	1.25494	1.51008	NA	STYX	-0.202682	0.396557	1.38251	0.0250404	NR
CS081_10	sp|D3Z070|CS081_MOUSE	D3Z070	10	0.999	______MQPEVEPLISPNLGAPGSHRETGSF	S	P	N	L	5	2	3	0.011595	0.193458	-0.41694	0.147134	-0.0351798	STYX	0.102526	0.558712	-0.101662	0.609444	CENTER
CS2IP_229	sp|Q8CH19|CS2IP_MOUSE	Q8CH19	229	0.992	RLWSSLLESSQKALSSPSFTNRLQRNSFPPT	S	P	S	F	4	2	2	0.403508	0.274521	NA	0.254587	0.585277	STYX	0.339014	0.126838	0.419932	0.322707	CENTER
CS2IP_283	sp|Q8CH19|CS2IP_MOUSE	Q8CH19	283	0.998	IPVSNSNNNVFSLPLSPAKSRKSTPSPHSFL	S	P	A	K	4	2	2	0.168447	-0.22029	0.350675	-0.0592875	NA	STYX	-0.0259212	0.896347	0.145694	0.789861	CENTER
CS2IP_362 363	sp|Q8CH19|CS2IP_MOUSE	Q8CH19	362 363	0.896	LPSIHPKPNPSGQRVSSPKPCIKNKIASVPC PSIHPKPNPSGQRVSSPKPCIKNKIASVPCS	S	S	P	K	5	2	3	-0.171839	0.174531	1.43702	0.433509	2.25687	STYX	0.0013462	0.997441	1.3758	0.0191926	NR
CS2IP_428	sp|Q8CH19|CS2IP_MOUSE	Q8CH19	428	0.994	GSVPVDVVNKIINSISKSTIQKDLSRQILFR	S	K	S	T	4	2	2	0.282488	-0.121229	NA	0.838712	1.1525	STYX	0.0806294	0.729908	0.995605	0.0516282	NR
CS2IP_681	sp|Q8CH19|CS2IP_MOUSE	Q8CH19	681	1	EFIRGSSSDTIKLRQSPPVKAKPVRSHNSKC	S	P	P	V	4	2	2	0.0348966	0.270086	1.15717	NA	1.52957	STYX	0.152491	0.424261	1.34337	0.0270535	NR
CSDC2_19	sp|Q91YQ3|CSDC2_MOUSE	Q91YQ3	19	0.999	ESTLPPVVPPLHSPKSPVWPTFPFHREGSRI	S	P	V	W	5	2	3	-0.0707359	-0.25497	-0.40817	0.00705437	0.123407	STYX	-0.162853	0.379788	-0.0925696	0.633104	CENTER
CSDC2_59	sp|Q91YQ3|CSDC2_MOUSE	Q91YQ3	59	0.982	RDLPSPLPTKRTRTYSATARASAGPVFKGVC	S	A	T	A	4	2	2	0.0926268	0.0607357	-1.17496	NA	-1.98537	STYX	0.0766813	0.623585	-1.58016	0.0187495	NR
CSDE1_116	sp|Q91W50|CSDE1_MOUSE	Q91W50	116	0.996	NGQVVCAVPHNLESKSPAAPGQSPTGSVCYE	S	P	A	A	5	2	3	-0.152582	-0.114516	0.375895	0.269884	0.0526539	STYX	-0.133548	0.447055	0.232811	0.514633	CENTER
CSDE1_123	sp|Q91W50|CSDE1_MOUSE	Q91W50	123	0.998	VPHNLESKSPAAPGQSPTGSVCYERNGEVFY	S	P	T	G	4	2	2	-0.0927916	0.179102	0.0974457	NA	-0.162831	STYX	0.0431554	0.81032	-0.0326929	0.815509	CENTER
CSDE1_276	sp|Q91W50|CSDE1_MOUSE	Q91W50	276	1	EHFEGTVTKVIPKVPSKNQNDPLPGRIKVDF	S	K	N	Q	5	2	3	-0.00696132	0.186491	0.0143501	-0.264868	0.172194	STYX	0.0897646	0.605628	-0.026108	0.794454	CENTER
CSK22_21	sp|O54833|CSK22_MOUSE	O54833	21	0.996	AGSRARVYAEVNSLRSREYWDYEAHVPSWGN	S	R	E	Y	5	2	3	-0.70424	0.219269	1.20627	-0.142309	0.761522	STYX	-0.242486	0.573412	0.608494	0.184666	CENTER
CSK2B_209	sp|P67871|CSK2B_MOUSE	P67871	209	0.999	PMAYQLQLQAASNFKSPVKTIR_________	S	P	V	K	4	2	2	1.09442	1.21249	NA	0.215794	-0.10562	STYX	1.15345	0.021269	0.0550869	0.981709	NR
CSKI1_1036	sp|Q6P9K8|CSKI1_MOUSE	Q6P9K8	1036	1	AIRRPPEGHPTPRPASPEPGRVATVLASVKH	S	P	E	P	5	2	3	-0.0408363	0.135969	-0.333918	-0.792371	0.228247	STYX	0.0475664	0.757916	-0.299347	0.306425	CENTER
CSKI1_1078	sp|Q6P9K8|CSKI1_MOUSE	Q6P9K8	1078	0.85	NRRRTLSGPVTGLLATARRGSGEPAEQSHFM	T	A	R	R	5	2	3	0.265675	-0.191899	-1.30875	-1.13735	-0.670538	STYX	0.036888	0.898039	-1.03888	0.00950637	NR
CSKI1_1083	sp|Q6P9K8|CSKI1_MOUSE	Q6P9K8	1083	0.999	LSGPVTGLLATARRGSGEPAEQSHFMEDGTA	S	G	E	P	5	2	3	-0.296762	-0.0980855	-0.565368	-0.766279	-0.297968	STYX	-0.197424	0.299115	-0.543205	0.0646998	CENTER
CSKI1_1244	sp|Q6P9K8|CSKI1_MOUSE	Q6P9K8	1244	0.983	SPKPILSQPVSKIQGSPTPASKKVPLPGPGS	S	P	T	P	5	2	3	-0.130966	0.0293347	-0.536417	-0.899938	-1.1694	STYX	-0.0508157	0.793872	-0.868586	0.0164689	NR
CSKI1_1246	sp|Q6P9K8|CSKI1_MOUSE	Q6P9K8	1246	0.981	KPILSQPVSKIQGSPTPASKKVPLPGPGSPE	T	P	A	S	4	2	2	-0.00571244	0.000248426	NA	-0.382906	-0.978742	STYX	-0.00273201	0.976251	-0.680824	0.0931897	CENTER
CSKI1_1259	sp|Q6P9K8|CSKI1_MOUSE	Q6P9K8	1259	1	SPTPASKKVPLPGPGSPEVKRAHGTPPPVSP	S	P	E	V	5	2	3	-0.253374	0.261273	-0.732294	-1.03143	-1.018	STYX	0.0039493	0.978046	-0.927243	0.0113103	NR
CSKI1_358	sp|Q6P9K8|CSKI1_MOUSE	Q6P9K8	358	0.998	EAIVKRAGSRTGSEPSPPQGGGSLGPSAPPE	S	P	P	Q	5	2	3	-0.383232	-0.10013	-0.17636	-0.322775	0.0443955	STYX	-0.241681	0.235445	-0.15158	0.474217	CENTER
CSKI1_779	sp|Q6P9K8|CSKI1_MOUSE	Q6P9K8	779	0.998	PGKPRQVLPSGASHFTPPQTPTKAQPGSPQA	T	P	P	Q	5	2	3	-0.592728	-0.138115	-0.199749	-0.64379	-0.815833	STYX	-0.365421	0.13795	-0.553124	0.0700796	CENTER
CSKI1_791	sp|Q6P9K8|CSKI1_MOUSE	Q6P9K8	791	0.999	SHFTPPQTPTKAQPGSPQALGGPHGPATAKV	S	P	Q	A	5	2	3	-0.245728	-0.0157226	-0.819948	-0.787288	-1.10307	STYX	-0.130725	0.491263	-0.903434	0.0124268	NR
CSKI1_821	sp|Q6P9K8|CSKI1_MOUSE	Q6P9K8	821	0.998	VKPTPQLLPPTDRPMSPRSLPQSPTHRGFAY	S	P	R	S	5	2	3	-0.215593	0.0443876	-0.829535	-0.673631	-1.58521	STYX	-0.0856025	0.663026	-1.02946	0.0120211	NR
CSKI1_828	sp|Q6P9K8|CSKI1_MOUSE	Q6P9K8	828	0.997	LPPTDRPMSPRSLPQSPTHRGFAYVLPQPVE	S	P	T	H	5	2	3	-0.440472	-0.045862	-0.653049	-0.713495	-0.325829	STYX	-0.243167	0.279051	-0.564124	0.0562842	CENTER
CSN1_448	sp|Q99LD4|CSN1_MOUSE	Q99LD4	448	1	MILRAAVLRNQIHVKSPPREGSQGELTPANS	S	P	P	R	5	2	3	-0.130386	0.118981	0.324501	0.205797	0.50178	STYX	-0.00570245	0.991963	0.344026	0.312731	CENTER
CSN1_454	sp|Q99LD4|CSN1_MOUSE	Q99LD4	454	0.999	VLRNQIHVKSPPREGSQGELTPANSQSRMST	S	Q	G	E	5	2	3	-0.105021	0.00317701	0.0357976	0.0421206	0.176497	STYQ	-0.0509219	0.792918	0.084805	0.884295	CENTER
CSN1_459	sp|Q99LD4|CSN1_MOUSE	Q99LD4	459	0.999	IHVKSPPREGSQGELTPANSQSRMSTNM___	T	P	A	N	5	2	3	0.168229	0.596814	0.398024	0.474805	0.241095	STYX	0.382522	0.140477	0.371308	0.27188	CENTER
CSN1_463	sp|Q99LD4|CSN1_MOUSE	Q99LD4	463	0.993	SPPREGSQGELTPANSQSRMSTNM_______	S	Q	S	R	5	2	3	0.0534482	0.27006	-0.377015	0.0534313	0.198679	STYQ	0.161754	0.394679	-0.0416347	0.764175	CENTER
CSN3_410	sp|O88543|CSN3_MOUSE	O88543	410	0.998	QEITVNPQFVQKSMGSQEDDSGNKPSSYS__	S	Q	E	D	4	2	2	0.534452	0.583996	0.22438	0.430607	NA	STYQ	0.559224	0.0508827	0.327493	0.432208	CENTER
CSN8_157	sp|Q8VBV7|CSN8_MOUSE	Q8VBV7	157	0.991	EEAVKGVLEQGWQADSTTRMVLPRKPASGTL	S	T	T	R	4	2	2	0.117989	0.0499725	NA	-0.145136	1.08026	STYX	0.0839808	0.596307	0.467562	0.462152	CENTER
CSPP1_148	sp|B2RX88|CSPP1_MOUSE	B2RX88	148	1	RLSAKERLKLERNREYNQFLRGKAESTEKVR	Y	N	Q	F	4	2	2	-0.421075	-0.180415	0.741136	NA	0.0350413	STYX	-0.300745	0.144212	0.388089	0.421415	CENTER
CSPP1_831	sp|B2RX88|CSPP1_MOUSE	B2RX88	831	1	RENIIGDETKHLRQPSPVVPALQNKIASKLQ	S	P	V	V	5	2	3	0.488953	0.562955	0.326497	0.462283	0.480493	STYX	0.525954	0.0569743	0.423091	0.209411	CENTER
CSPP1_869	sp|B2RX88|CSPP1_MOUSE	B2RX88	869	1	IISSFIHESSMSRAQSPPVPARKNQLRAEEE	S	P	P	V	5	2	3	0.623282	0.667426	0.0172426	0.520185	0.228111	STYX	0.645354	0.0406019	0.25518	0.489536	CENTER
CSRP1_192	sp|P97315|CSRP1_MOUSE	P97315	192	1	PKGFGFGQGAGALVHSE______________	S	E	_	_	5	2	3	-0.481897	0.310624	-0.260598	-0.319068	-0.302927	STYX	-0.0856365	0.778034	-0.294197	0.218816	CENTER
CSTF2_527	sp|Q8BIQ5|CSTF2_MOUSE	Q8BIQ5	527	0.998	MQGASMQGGSQPGGFSPGQSQVTPQDHEKAA	S	P	G	Q	5	2	3	0.0632007	-0.441848	-0.00237191	0.104778	0.540197	STYX	-0.189324	0.444168	0.214201	0.592879	CENTER
CSTFT_470 471	sp|Q8C7E9|CSTFT_MOUSE	Q8C7E9	470 471	0.897	RGMDARGLEMRGPGPSSRGPMTGGIQGPGPI GMDARGLEMRGPGPSSRGPMTGGIQGPGPIN	S	S	R	G	4	2	2	-0.135009	-0.0207648	0.379938	NA	0.402575	STYX	-0.0778871	0.673019	0.391256	0.339892	CENTER
CSTFT_579	sp|Q8C7E9|CSTFT_MOUSE	Q8C7E9	579	0.995	MQGASKQGGGQPSSFSPGQSQVTPQDQEKAA	S	P	G	Q	4	2	2	0.325003	0.186413	0.655356	0.490994	NA	STYX	0.255708	0.206474	0.573175	0.181317	CENTER
CSTFT_583	sp|Q8C7E9|CSTFT_MOUSE	Q8C7E9	583	0.944	SKQGGGQPSSFSPGQSQVTPQDQEKAALIMQ	S	Q	V	T	4	2	2	0.543824	0.158414	0.365718	0.166306	NA	STYQ	0.351119	0.155577	0.266012	0.530568	CENTER
CT027_99	sp|Q9D1K7|CT027_MOUSE	Q9D1K7	99	0.996	PVHSLHLKLLSVTPTSEGYSIKCEYSAHKEG	S	E	G	Y	5	2	3	-0.0940904	0.22994	0.833406	0.740309	0.873908	STYX	0.0679248	0.736602	0.815874	0.032454	CENTER
CT085_88	sp|Q9DA42|CT085_MOUSE	Q9DA42	88	1	VRPVSPMDKHIKILPSPPVPKTTQGFIGWRS	S	P	P	V	5	2	3	-0.328511	0.184813	0.478586	0.296712	1.06794	STYX	-0.0718487	0.756803	0.614411	0.109641	CENTER
CT2NL_488	sp|Q99LJ0|CT2NL_MOUSE	Q99LJ0	488	0.989	DQQASGLQSPPSRDLSPTLLDNSAAKQLARN	S	P	T	L	5	2	3	-0.464177	0.047514	-0.243102	-0.41036	-0.174865	STYX	-0.208332	0.407301	-0.276109	0.249246	CENTER
CT2NL_567	sp|Q99LJ0|CT2NL_MOUSE	Q99LJ0	567	0.994	GKVSSPLSPLSPGIKSPTIPRAERGNPPPIP	S	P	T	I	5	2	3	-0.531812	0.0444373	0.156489	-0.430501	-0.0466127	STYX	-0.243687	0.370937	-0.106875	0.599289	CENTER
CTDP1_730	sp|Q7TSG2|CTDP1_MOUSE	Q7TSG2	730	1	LFPLIDDDTRTHRDNSPAVFPDRHSVLPTAL	S	P	A	V	5	2	3	0.117967	-0.0961911	-0.101962	0.241413	-0.225818	STYX	0.010888	0.92821	-0.0287888	0.779675	CENTER
CTF18_70	sp|Q8BIW9|CTF18_MOUSE	Q8BIW9	70	0.994	AIAGGDTVPRPCPAGSPGNVNRNTRKNVRRD	S	P	G	N	5	2	3	-0.189794	-0.237499	-0.501645	-0.180093	-0.0209959	STYX	-0.213647	0.240503	-0.234244	0.333239	CENTER
CTF18_90 91	sp|Q8BIW9|CTF18_MOUSE	Q8BIW9	90 91	0.895	NRNTRKNVRRDQPAPSSPMVKRPRLDVVKKL RNTRKNVRRDQPAPSSPMVKRPRLDVVKKLN	S	S	P	M	5	2	3	0.28076	0.25178	-0.146829	0.587877	-0.194808	STYX	0.26627	0.185433	0.08208	0.980567	CENTER
CTF18_91	sp|Q8BIW9|CTF18_MOUSE	Q8BIW9	91	0.99	RNTRKNVRRDQPAPSSPMVKRPRLDVVKKLN	S	P	M	V	4	2	2	0.423959	0.310736	NA	0.310991	0.298087	STYX	0.367348	0.110033	0.304539	0.454656	CENTER
CTGE5_514	sp|Q8R311|CTGE5_MOUSE,sp|Q91ZV0|MIA2_MOUSE	Q8R311	514	0.998	PSPLGRPPSETRAFLSPPTLLEGPLRLSPLL	S	P	P	T	5	2	3	-0.594948	0.232199	-0.268119	-0.57017	0.110425	STYX	-0.181374	0.625178	-0.242621	0.337218	CENTER
CTGE5_561	sp|Q8R311|CTGE5_MOUSE,sp|Q91ZV0|MIA2_MOUSE	Q8R311	561	0.997	HQMNTERGESSYDRLSDAPRAPSDRSLSPPW	S	D	A	P	4	2	2	0.121229	0.33966	-0.646508	NA	-0.196795	STYX	0.230444	0.255945	-0.421651	0.216665	CENTER
CTGE5_573	sp|Q8R311|CTGE5_MOUSE,sp|Q91ZV0|MIA2_MOUSE	Q8R311	573	0.997	DRLSDAPRAPSDRSLSPPWEQDRRMTAHPPP	S	P	P	W	5	2	3	-0.131399	0.207554	-0.149698	-0.250369	0.00351928	STYX	0.0380774	0.856515	-0.132183	0.513069	CENTER
CTGE5_611	sp|Q8R311|CTGE5_MOUSE,sp|Q91ZV0|MIA2_MOUSE	Q8R311	611	1	ALQRQDRFYPNSGRLSGPAELRSYNMPSLDK	S	G	P	A	5	2	3	0.0604093	0.0716317	-0.447073	-0.380499	-0.805641	STYX	0.0660205	0.665396	-0.544404	0.0634282	CENTER
CTIP_325 326	sp|Q80YR6|CTIP_MOUSE	Q80YR6	325 326	0.893	DSASKTPPQEFTTRASSPVFGATSTVKAHLG SASKTPPQEFTTRASSPVFGATSTVKAHLGL	S	S	P	V	5	2	3	-0.0173036	0.859973	0.577843	0.39916	0.23364	STYX	0.421335	0.283929	0.403548	0.240126	CENTER
CTIP_326	sp|Q80YR6|CTIP_MOUSE	Q80YR6	326	0.995	SASKTPPQEFTTRASSPVFGATSTVKAHLGL	S	P	V	F	5	2	3	0.493726	0.794206	0.377527	0.514182	0.411463	STYX	0.643966	0.0445644	0.434391	0.198441	CENTER
CTIP_566	sp|Q80YR6|CTIP_MOUSE	Q80YR6	566	0.995	TYCLQPRSLQSSSKFSPDQKTPLQIKEENPV	S	P	D	Q	5	2	3	0.556419	0.956329	0.327916	0.489698	0.0665863	STYX	0.756374	0.0360949	0.294733	0.403884	CENTER
CTIP_871	sp|Q80YR6|CTIP_MOUSE	Q80YR6	871	1	QTCLERGYIKEDLDLSPRPKRRQPYNAVFSP	S	P	R	P	5	2	3	0.867289	0.52505	0.296986	0.550198	0.30684	STYX	0.69617	0.0398789	0.384675	0.257254	CENTER
CTL2_689 690 691	sp|Q8BY89|CTL2_MOUSE	Q8BY89	689 690 691	0.899	DLERNDGSAERPYFMSSTLKKLLNKTNKKVA LERNDGSAERPYFMSSTLKKLLNKTNKKVAE ERNDGSAERPYFMSSTLKKLLNKTNKKVAES	S	S	T	L	4	2	2	0.35977	-0.0448221	-0.323463	-0.0741204	NA	STYX	0.157474	0.490838	-0.198792	0.470505	CENTER
CTL2_691	sp|Q8BY89|CTL2_MOUSE	Q8BY89	691	0.993	ERNDGSAERPYFMSSTLKKLLNKTNKKVAES	T	L	K	K	4	2	2	0.225003	-0.0147511	-0.416536	-0.43468	NA	STYX	0.105126	0.568594	-0.425608	0.184538	CENTER
CTNA1_652 654 655	sp|P26231|CTNA1_MOUSE,sp|Q61301|CTNA2_MOUSE	P26231	652 654 655	0.871	ELDDSDFETEDFDVRSRTSVQTEDDQLIAGQ DDSDFETEDFDVRSRTSVQTEDDQLIAGQSA DSDFETEDFDVRSRTSVQTEDDQLIAGQSAR	S	R	T	S	4	2	2	-0.063374	-0.134874	-0.163354	-0.0485015	NA	STYX	-0.099124	0.582798	-0.105928	0.646306	CENTER
CTNA1_655	sp|P26231|CTNA1_MOUSE,sp|Q61301|CTNA2_MOUSE	P26231	655	0.993	DSDFETEDFDVRSRTSVQTEDDQLIAGQSAR	S	V	Q	T	5	2	3	-0.0185676	-0.170954	-0.713033	-0.475653	-0.485993	STYX	-0.0947607	0.607594	-0.558227	0.0534761	CENTER
CTNA2_939	sp|Q61301|CTNA2_MOUSE	Q61301	939	0.999	EFQTRVRRGSQKKHISPVQALSEFKAMDSF_	S	P	V	Q	5	2	3	0.150897	0.356012	-0.388156	-0.464036	-0.0903145	STYX	0.253454	0.219412	-0.314169	0.211704	CENTER
CTNA3_650	sp|Q65CL1|CTNA3_MOUSE	Q65CL1	650	0.997	DVSDLEDDHEVRSHTSIQTEGKTDRAKMTQL	S	I	Q	T	5	2	3	-0.0317129	-0.0122871	-0.265045	0.153025	-0.0348761	STYX	-0.022	0.937069	-0.0489653	0.728383	CENTER
CTNB1_551 552	sp|Q02248|CTNB1_MOUSE	Q02248	551 552	0.895	LVQLLVRAHQDTQRRTSMGGTQQQFVEGVRM VQLLVRAHQDTQRRTSMGGTQQQFVEGVRME	T	S	M	G	5	2	3	-0.156278	-0.0515609	-0.385163	-0.115257	-0.193725	STYX	-0.103919	0.565392	-0.231381	0.319091	CENTER
CTNB1_552	sp|Q02248|CTNB1_MOUSE	Q02248	552	0.994	VQLLVRAHQDTQRRTSMGGTQQQFVEGVRME	S	M	G	G	5	2	3	-0.502038	-0.0311864	-0.467379	-0.691671	-0.414237	STYX	-0.266612	0.274132	-0.524429	0.064586	CENTER
CTNB1_675	sp|Q02248|CTNB1_MOUSE	Q02248	675	0.999	FRMSEDKPQDYKKRLSVELTSSLFRTEPMAW	S	V	E	L	5	2	3	-0.41771	-0.198352	0.0649278	-1.35088	-0.206747	STYX	-0.308031	0.133232	-0.497565	0.21346	CENTER
CTND1_268 269	sp|P30999|CTND1_MOUSE	P30999	268 269	0.895	RQDVYGPQPQVRVGGSSVDLHRFHPEPYGLE QDVYGPQPQVRVGGSSVDLHRFHPEPYGLED	S	S	V	D	5	2	3	-0.145531	0.0344839	-0.566793	-0.335421	-0.473004	STYX	-0.0555236	0.772085	-0.458406	0.090272	CENTER
CTND1_288	sp|P30999|CTND1_MOUSE	P30999	288	0.999	HRFHPEPYGLEDDQRSMGYDDLDYGMMSDYG	S	M	G	Y	5	2	3	-0.724581	-0.221519	-0.283959	-0.858341	-0.374704	STYX	-0.47305	0.0786169	-0.505668	0.0872	CENTER
CTND1_310	sp|P30999|CTND1_MOUSE	P30999	310	0.987	DYGMMSDYGTARRTGTPSDPRRRLRSYEDMI	T	P	S	D	5	2	3	0.196456	-0.755301	-1.16168	-0.708167	-0.46516	STYX	-0.279422	0.530537	-0.778336	0.0246008	CENTER
CTND1_346	sp|P30999|CTND1_MOUSE	P30999	346	0.996	PDQYYWAPLAQHERGSLASLDSLRKGMPPPS	S	L	A	S	5	2	3	0.0241854	0.149108	-0.422795	-0.301509	0.513645	STYX	0.0866465	0.597322	-0.0702195	0.648352	CENTER
CTND1_349	sp|P30999|CTND1_MOUSE	P30999	349	0.998	YYWAPLAQHERGSLASLDSLRKGMPPPSNWR	S	L	D	S	5	2	3	-0.0676929	0.287653	-0.682886	-1.20032	-0.788812	STYX	0.10998	0.604842	-0.890673	0.0141166	NR
CTND1_47	sp|P30999|CTND1_MOUSE	P30999	47	1	EERRHVSAQLERVRVSPQDANSLMANGTLTR	S	P	Q	D	5	2	3	-0.0744308	-0.174215	-0.339517	-0.141698	-0.49036	STYX	-0.124323	0.486598	-0.323858	0.197893	CENTER
CTND1_916	sp|P30999|CTND1_MOUSE	P30999	916	1	DNNYSTLNERGDHNRTLDRSGDLGDMEPLKG	T	L	D	R	5	2	3	0.611228	-0.801326	-0.561941	-0.868697	-1.76335	STYX	-0.0950488	0.871293	-1.06466	0.0136799	NR
CTND1_920	sp|P30999|CTND1_MOUSE	P30999	920	1	STLNERGDHNRTLDRSGDLGDMEPLKGAPLM	S	G	D	L	5	2	3	-0.365067	-0.0633722	-0.893339	-0.499928	-0.196226	STYX	-0.214219	0.297494	-0.529831	0.0816762	CENTER
CTND2_1094	sp|O35927|CTND2_MOUSE	O35927	1094	0.993	PSISPVRVSPNNRSASAPASPREMISLKERK	S	A	P	A	5	2	3	0.124796	0.0931536	-0.567207	-0.695718	-1.07329	STYX	0.108975	0.503029	-0.778739	0.0216494	CENTER
CTNL1_373	sp|O88327|CTNL1_MOUSE	O88327	373	0.999	QLLSVWMQTQSRKTKSAAEELELTVLKISHS	S	A	A	E	5	2	3	-0.599808	-0.120242	-0.386043	-1.54122	-0.160249	STYX	-0.360025	0.151459	-0.695836	0.0834149	CENTER
CTNL1_537	sp|O88327|CTNL1_MOUSE	O88327	537	0.999	SDVFEGRRGERCDHLSLPKPTKNSANLKSLK	S	L	P	K	5	2	3	-0.146053	-0.0663019	-1.31913	-1.81159	-1.38678	STYX	-0.106177	0.552673	-1.50583	0.00371515	NR
CTR2_645	sp|P18581|CTR2_MOUSE	P18581	645	1	EKSAMQANDHHQRNLSLPFILHEKTSEC___	S	L	P	F	5	2	3	-0.0317361	0.527692	-1.27968	-1.55706	-1.14636	STYX	0.247978	0.374135	-1.3277	0.00450835	NR
CTR4_427	sp|Q8BLQ7|CTR4_MOUSE	Q8BLQ7	427	0.996	LRFQKASPPSSPCLASPGPTAKKYDSFSDHI	S	P	G	P	4	2	2	-0.116234	-0.165578	-0.348046	-0.727332	NA	STYX	-0.140906	0.423869	-0.537689	0.133747	CENTER
CTR9_925	sp|Q62018|CTR9_MOUSE	Q62018	925	0.999	RSKKGGEFDEFVNDDTDDDLPVSKKKKRRKG	T	D	D	D	4	2	2	-0.548293	-0.0592289	NA	-0.248524	0.138958	STYX	-0.303761	0.225211	-0.0547829	0.764439	CENTER
CTR9_941	sp|Q62018|CTR9_MOUSE	Q62018	941	0.96	DDDLPVSKKKKRRKGSGSEQEGEEEEGGERK	S	G	S	E	4	2	2	0.337802	-0.219834	0.339629	0.0806593	NA	STYX	0.058984	0.870141	0.210144	0.639917	CENTER
CTR9_943	sp|Q62018|CTR9_MOUSE	Q62018	943	0.996	DLPVSKKKKRRKGSGSEQEGEEEEGGERKKK	S	E	Q	E	4	2	2	0.525145	-0.171385	0.109048	-0.189278	NA	STYX	0.17688	0.63879	-0.040115	0.796672	CENTER
CTR9_970	sp|Q62018|CTR9_MOUSE	Q62018	970	0.999	RKKKRRRRPPKGEEGSEEEETENGPKPKKRR	S	E	E	E	5	2	3	0.861951	0.0316054	-0.360484	0.124911	0.320699	STYX	0.446778	0.223409	0.0283754	0.952813	CENTER
CTRO_1348	sp|P49025|CTRO_MOUSE	P49025	1348	0.997	PATARQQIAMSAIVRSPEHQPSAMSLLAPPS	S	P	E	H	5	2	3	-0.0154029	0.843508	-0.104048	0.274819	-0.0345969	STYX	0.414052	0.282717	0.0453913	0.989563	CENTER
CTRO_1458	sp|P49025|CTRO_MOUSE	P49025	1458	0.995	YATHFTEAFCRDKMNSPGLQSKEPGSSLHLE	S	P	G	L	5	2	3	1.17441	-0.0386407	0.597339	0.208219	0.850683	STYX	0.567887	0.286821	0.55208	0.134649	CENTER
CTSL2_13	sp|Q8BG15|CTSL2_MOUSE	Q8BG15	13	0.992	___MKLRTRKASQQSSPIQTQRTARAKRKYS	S	P	I	Q	5	2	3	1.1265	0.857359	0.145821	0.285202	-0.176759	STYX	0.991927	0.0246825	0.0847546	0.894709	NR
CTSR1_244	sp|Q91ZR5|CTSR1_MOUSE	Q91ZR5	244	0.997	RHYHGDHMHHHIHHRSPSASQLSHKSHSTLA	S	P	S	A	5	2	3	-0.273167	-0.0397839	0.41947	0.566787	0.777781	STYX	-0.156475	0.415246	0.588013	0.0993523	CENTER
CTSR1_246	sp|Q91ZR5|CTSR1_MOUSE	Q91ZR5	246	0.995	YHGDHMHHHIHHRSPSASQLSHKSHSTLATS	S	A	S	Q	4	2	2	-0.30748	-0.146622	NA	-0.300214	0.927608	STYX	-0.227051	0.228369	0.313697	0.66108	CENTER
CTSR1_293	sp|Q91ZR5|CTSR1_MOUSE	Q91ZR5	293	0.998	FGARSQIFGKAQSRESLRESASLSEGEDHVQ	S	L	R	E	5	2	3	0.39866	-0.538492	2.16243	1.48071	1.7029	STYX	-0.0699162	0.830799	1.78201	0.00401648	NR
CTSR1_301	sp|Q91ZR5|CTSR1_MOUSE	Q91ZR5	301	0.999	GKAQSRESLRESASLSEGEDHVQKRKKAQRA	S	E	G	E	5	2	3	-0.195124	0.0588689	0.573508	0.864539	0.85344	STYX	-0.0681278	0.728724	0.763829	0.0428794	CENTER
CTSR3_14	sp|Q80W99|CTSR3_MOUSE	Q80W99	14	0.992	__MSQHFHHNPVRVKSGSLFATASEALQARL	S	G	S	L	5	2	3	-0.787659	-0.194837	-0.18737	-0.0865699	0.313601	STYX	-0.491248	0.0876349	0.0132203	0.894191	CENTER
CTSR4_428	sp|Q8BVN3|CTSR4_MOUSE	Q8BVN3	428	0.988	NKQDLITALVSREKVSDSNINMVNKHKFSH_	S	D	S	N	4	2	2	-0.0973724	-0.206345	NA	0.346761	0.572952	STYX	-0.151859	0.399699	0.459857	0.274965	CENTER
CTTB2_472	sp|B9EJA2|CTTB2_MOUSE	B9EJA2	472	0.912	DQNGNNTQSPPSRDVSPTSRDNLVAKQLARN	S	P	T	S	5	2	3	0.0217086	0.470659	0.207558	0.0292427	-0.102889	STYX	0.246184	0.319626	0.0446374	0.993748	CENTER
CUL3_737	sp|Q9JLV5|CUL3_MOUSE	Q9JLV5	737	1	LVAEVTQQLKARFLPSPVVIKKRIEGLIERE	S	P	V	V	5	2	3	-0.47175	0.308909	1.18231	0.886383	0.914099	STYX	-0.0814209	0.782439	0.994265	0.0169225	NR
CUL4B_106	sp|A2A432|CUL4B_MOUSE	A2A432	106	0.997	AAQEVRSATDGNTSTTPPTSAKKRKLNSSSS	T	P	P	T	5	2	3	-0.354617	-0.162778	0.0472839	0.123011	-0.451605	STYX	-0.258698	0.18424	-0.0937699	0.638997	CENTER
CUL4B_149	sp|A2A432|CUL4B_MOUSE	A2A432	149	0.993	STSSSSTPPQPRDSASPSTSSFCLGVPVATS	S	P	S	T	5	2	3	-0.0659766	0.441489	0.602133	0.487618	-0.020984	STYX	0.187756	0.478038	0.356256	0.334026	CENTER
CUL4B_82	sp|A2A432|CUL4B_MOUSE	A2A432	82	0.997	LGAMKSVCPGTSGFSSPNPSAASAAAQEVRS	S	P	N	P	5	2	3	0.224072	-0.0460248	0.145934	-0.26814	0.0379176	STYX	0.0890236	0.634132	-0.0280961	0.789351	CENTER
CUL9_1318	sp|Q80TT8|CUL9_MOUSE	Q80TT8	1318	0.998	DVPFCGNKNTETSRPSPEAVVALASLQLPAG	S	P	E	A	4	2	2	0.114742	0.0373009	NA	0.105647	0.774978	STYX	0.0760215	0.62813	0.440312	0.349527	CENTER
CUL9_1775	sp|Q80TT8|CUL9_MOUSE	Q80TT8	1775	0.998	AILQHSTQDFRVGLQSPSVETREVKGSNVPS	S	P	S	V	5	2	3	0.172115	-0.0939277	0.321827	0.12316	0.984363	STYX	0.0390935	0.825449	0.47645	0.223644	CENTER
CUX1_1468	sp|P53564|CUX1_MOUSE	P53564	1468	0.994	PSTSAPANAPARRPSSLQSLFGLPEAAGARD	S	L	Q	S	5	2	3	-0.767031	-0.2093	0.340952	-0.0873387	-0.260829	STYX	-0.488165	0.0816664	-0.00240529	0.844138	CENTER
CUX1_427	sp|P53564|CUX1_MOUSE	P53564	427	1	GRDQPESRRPGPLPASPPPQLPRNTGEQVSN	S	P	P	P	5	2	3	0.504195	0.0670777	0.196285	-0.591074	-0.139809	STYX	0.285636	0.247518	-0.178199	0.471226	CENTER
CWC22_105 106	sp|Q8C5N3|CWC22_MOUSE	Q8C5N3	105 106	0.889	KSPSPDRSPARGGGQSSPQEEPTWKKKKDEL SPSPDRSPARGGGQSSPQEEPTWKKKKDELD	S	S	P	Q	4	2	2	0.335777	0.278846	-0.100049	NA	-0.457674	STYX	0.307311	0.147329	-0.278862	0.357652	CENTER
CWC22_106	sp|Q8C5N3|CWC22_MOUSE	Q8C5N3	106	0.995	SPSPDRSPARGGGQSSPQEEPTWKKKKDELD	S	P	Q	E	5	2	3	0.197686	0.134606	-0.346186	-0.273751	-0.318433	STYX	0.166146	0.348797	-0.31279	0.197482	CENTER
CWC22_38	sp|Q8C5N3|CWC22_MOUSE	Q8C5N3	38	0.999	RRSSSPEDRYTEQERSPRDRGYSDYSRSDYE	S	P	R	D	5	2	3	0.424462	-0.0164459	-0.278555	0.426421	0.0743599	STYX	0.204008	0.399511	0.0740753	0.947748	CENTER
CWC22_829	sp|Q8C5N3|CWC22_MOUSE	Q8C5N3	829	0.996	EDRHGEPKKRRERRDSFSENEKQRSRNQDSD	S	F	S	E	5	2	3	0.120619	0.125694	-0.813512	-0.806287	-0.990451	STYX	0.123157	0.456323	-0.870083	0.0134661	NR
CX038_315	sp|Q8C5K5|CX038_MOUSE	Q8C5K5	315	1	HLQHQKQTSKDAGRQTPERKA__________	T	P	E	R	5	2	3	1.71056	-1.11123	0.835299	0.802868	-0.56214	STYX	0.299662	0.991604	0.358676	0.43534	CENTER
CX049_123	sp|Q9D454|CX049_MOUSE	Q9D454	123	0.999	QQVTNLETKGAREHPSPESVCAETEAGSIRR	S	P	E	S	5	2	3	0.035899	0.0157545	1.01829	0.451548	0.384128	STYX	0.0258268	0.840467	0.617988	0.100583	CENTER
CX049_84	sp|Q9D454|CX049_MOUSE	Q9D454	84	1	EYCPDSLVPEEERVGSPMDEKVVGLDFLSQP	S	P	M	D	5	2	3	0.401024	-0.107845	0.914906	1.04285	1.48602	STYX	0.14659	0.587983	1.14793	0.0115948	NR
[truncated: 8,698 more rows]

## Sheet: RemovedQuadrSites
ProtName_site	All_Parent_Proteins	UniProtID	position	BestProb	Sequence_window	P	P.1	P.2	P.3	Total_ExpObservations	AZ20_ExpObservations	RAD1_ExpObservations	AZ20_2-3day_1_ratio	AZ20_2-3day_2_ratio	RAD1_1_ratio	RAD1_2_ratio	RAD1_3_ratio	STY.Q.X	AZ20_Ratio_Avg	AZ20_pval_all	RAD1_Ratio_Avg	RAD1_pval_all	quadr
[truncated: 208 more rows]
