# Supplementary material for: Phosphoproteomics of ATR signaling in mouse testes
Source: eLife. 2022 Feb 8;11:e68648. doi: 10.7554/eLife.68648 (PMC8824463; doi:10.7554/eLife.68648)
Supplement: Supplementary file 5. — Gene ontology output from chord diagrams. See Materials and methods for more details. [file elife-68648-supp5.xlsx]

## Sheet: Chord_Ontology_Q2_STQ_4 hr ATRi
Category	ID	Term	Genes	adj_pval
BP	GO:0006281	DNA repair	Mum1,Rad50,Ercc3,Smc3,Nbn,Pagr1a,Slx4,Setx,Eya3,Mdc1,Uimc1	7e-09
BP	GO:0051276	Chromosome organization	Mum1,Rad50,Acin1,Ercc3,Smc3,Nbn,Pagr1a,Coprs,Slx4,Eya3,Uimc1	6.25e-06
BP	GO:0090304	Nucleic acid metabolic process	Mum1,Rad50,Acin1,Ercc3,Smc3,Nbn,Pagr1a,Slx4,Setx,Eya3,Mdc1,Tfam,Uimc1	2.35e-05
BP	GO:0033554	Cellular response to stress	Mum1,Rad50,Ercc3,Smc3,Nbn,Pagr1a,Slx4,Bclaf1,Setx,Eya3,Mdc1,Uimc1	3.53e-05
BP	GO:0006302	Double-strand break repair	Rad50,Nbn,Slx4,Setx,Eya3,Uimc1	7.54e-05
BP	GO:0051054	Positive regulation of dna metabolic process	Rad50,Nbn,Pagr1a,Slx4,Eya3,Uimc1	0.0002
BP	GO:0045935	Positive regulation of nucleobase-containing compound metabolic process	Rad50,Ercc3,Ncl,Nbn,Pagr1a,Slx4,Bclaf1,Setx,Eya3,Tfam,Uimc1	0.0019
BP	GO:0006310	DNA recombination	Rad50,Nbn,Pagr1a,Slx4,Setx	0.0027
BP	GO:0044260	Cellular macromolecule metabolic process	Arih2,Mum1,Rad50,Ercc3,Smc3,Nbn,Ppm1g,Pagr1a,Coprs,Slx4,Setx,Eya3,Mdc1,Tfam,Uimc1	0.0033
BP	GO:2001022	Positive regulation of response to dna damage stimulus	Pagr1a,Bclaf1,Eya3,Uimc1	0.0058
BP	GO:0032205	Negative regulation of telomere maintenance	Rad50,Nbn,Slx4	0.0086
BP	GO:0043170	Macromolecule metabolic process	Arih2,Mum1,Rad50,Acin1,Ercc3,Smc3,Nbn,Ppm1g,Pagr1a,Coprs,Slx4,Setx,Eya3,Mdc1,Tfam,Uimc1	0.0109
BP	GO:0031860	Telomeric 3 overhang formation	Rad50,Nbn	0.0141
BP	GO:0006996	Organelle organization	Mum1,Rad50,Acin1,Ercc3,Smc3,Nbn,Pagr1a,Coprs,Slx4,Eya3,Tfam,Uimc1	0.0189
BP	GO:0032206	Positive regulation of telomere maintenance	Rad50,Nbn,Slx4	0.0189
BP	GO:0090656	T-circle formation	Nbn,Slx4	0.0189
BP	GO:0051173	Positive regulation of nitrogen compound metabolic process	Arih2,Rad50,Ercc3,Ncl,Nbn,Pagr1a,Slx4,Bclaf1,Setx,Eya3,Tfam,Uimc1	0.0208
BP	GO:0006807	Nitrogen compound metabolic process	Arih2,Mum1,Rad50,Acin1,Ercc3,Smc3,Nbn,Ppm1g,Pagr1a,Coprs,Slx4,Setx,Eya3,Mdc1,Tfam,Uimc1	0.0293
BP	GO:0019219	Regulation of nucleobase-containing compound metabolic process	Rad50,Acin1,Ercc3,Ncl,Nbn,Pagr1a,Slx4,Bclaf1,Setx,Eya3,Tfam,Uimc1	0.0308
BP	GO:0031325	Positive regulation of cellular metabolic process	Arih2,Rad50,Ercc3,Ncl,Nbn,Pagr1a,Slx4,Bclaf1,Setx,Eya3,Tfam,Uimc1	0.035
BP	GO:1904354	Negative regulation of telomere capping	Rad50,Nbn	0.035
BP	GO:0051726	Regulation of cell cycle	Rad50,Ercc3,Smc3,Nbn,Ppm1g,Pagr1a,Uimc1	0.0413
BP	GO:0000723	Telomere maintenance	Rad50,Nbn,Slx4	0.0457
BP	GO:0010604	Positive regulation of macromolecule metabolic process	Arih2,Rad50,Ercc3,Ncl,Nbn,Pagr1a,Slx4,Bclaf1,Setx,Eya3,Tfam,Uimc1	0.046
BP	GO:0016043	Cellular component organization	Mum1,Rad50,Acin1,Ercc3,Smc3,Nbn,Pagr1a,Coprs,Gramd1c,Slx4,Setx,Eya3,Tfam,Uimc1	0.046
BP	GO:0032508	DNA duplex unwinding	Rad50,Ercc3,Nbn	0.046
BP	GO:0051321	Meiotic cell cycle	Rad50,Smc3,Nbn,Slx4	0.0465

## Sheet: Chord_Ontology_Q2_STPXK_4 hr AT
Category	ID	Term	Genes	adj_pval
BP	GO:0007049	Cell cycle	Msh6,Cdc20,Mtbp,Rbl1,Nek1,Ccar2,Npm1,Tdrd9,Lig3,Tdrd1,Hfm1,Zfp318	0.00084
BP	GO:0051276	Chromosome organization	Msh6,Cdc20,Phf10,Rbl1,Shprh,Msl1,Npm1,Brd1,Hat1,Hfm1	0.0067
BP	GO:0090304	Nucleic acid metabolic process	Msh6,Rfc1,Ccar2,Shprh,Npm1,Tdrd9,Rbm27,Lig3,Tdrd1,Hfm1,Nolc1,Lin52,Tcof1	0.0067
BP	GO:0006259	DNA metabolic process	Msh6,Rfc1,Shprh,Npm1,Tdrd9,Lig3,Tdrd1,Hfm1	0.0163
BP	GO:0006996	Organelle organization	Msh6,Cdc20,Phf10,Rbl1,Nek1,Ccar2,Shprh,Msl1,Npm1,Tdrd9,Lig3,Brd1,Hat1,Hfm1,Nolc1	0.0297
BP	GO:0010605	Negative regulation of macromolecule metabolic process	Msh6,Phf10,Ncl,Rbl1,Rfc1,Ccar2,Zfp608,Npm1,Tdrd9,Lig3,Srcin1,Tdrd1,Hat1,Zfp318	0.0297
BP	GO:0043170	Macromolecule metabolic process	Msh6,Cdc20,Phf10,Rfc1,Nek1,Ccar2,Shprh,Msl1,Npm1,Tdrd9,Rbm27,Lig3,Usp24,Brd1,Tdrd1,Hat1,Hfm1,Nolc1,Lin52,Tcof1	0.0297
BP	GO:0019222	Regulation of metabolic process	Msh6,Cdc20,Mtbp,Phf10,Ncl,Rbl1,Rfc1,Nek1,Ccar2,Suco,Zfp608,Npm1,Tdrd9,Lig3,Srcin1,Tdrd1,Hat1,Zfp318,Magi3,Nolc1,Tcof1	0.0325
BP	GO:0006325	Chromatin organization	Phf10,Rbl1,Shprh,Msl1,Npm1,Brd1,Hat1	0.034
BP	GO:0006807	Nitrogen compound metabolic process	Msh6,Cdc20,Phf10,Rfc1,Nek1,Ccar2,Shprh,Msl1,Npm1,Tdrd9,Rbm27,Lig3,Usp24,Brd1,Tdrd1,Hat1,Hfm1,Nolc1,Lin52,Tcof1	0.034
BP	GO:0010629	Negative regulation of gene expression	Phf10,Ncl,Rbl1,Rfc1,Ccar2,Zfp608,Npm1,Tdrd9,Tdrd1,Hat1,Zfp318	0.034
BP	GO:0016573	Histone acetylation	Phf10,Msl1,Brd1,Hat1	0.034
BP	GO:0044260	Cellular macromolecule metabolic process	Msh6,Cdc20,Phf10,Rfc1,Nek1,Shprh,Msl1,Npm1,Tdrd9,Lig3,Usp24,Brd1,Tdrd1,Hat1,Hfm1,Lin52,Tcof1	0.034
BP	GO:0045934	Negative regulation of nucleobase-containing compound metabolic process	Msh6,Phf10,Rbl1,Rfc1,Ccar2,Zfp608,Npm1,Lig3,Hat1,Zfp318	0.034
BP	GO:0051321	Meiotic cell cycle	Msh6,Tdrd9,Tdrd1,Hfm1,Zfp318	0.034
BP	GO:0060255	Regulation of macromolecule metabolic process	Msh6,Cdc20,Mtbp,Phf10,Ncl,Rbl1,Rfc1,Nek1,Ccar2,Zfp608,Npm1,Tdrd9,Lig3,Srcin1,Tdrd1,Hat1,Zfp318,Magi3,Nolc1,Tcof1	0.034
BP	GO:0006974	Cellular response to dna damage stimulus	Msh6,Rfc1,Nek1,Ccar2,Shprh,Npm1,Lig3	0.0373
BP	GO:0051172	Negative regulation of nitrogen compound metabolic process	Msh6,Phf10,Ncl,Rbl1,Rfc1,Ccar2,Zfp608,Npm1,Lig3,Srcin1,Hat1,Zfp318	0.0493

## Sheet: Chord_Ontology_Q2_STPXK_3D ATRi
Category	ID	Term	Genes	adj_pval
BP	GO:0007049	Cell cycle	Cdc20,Arpp19,Pttg1,Recql5,Rbl1,Sycp1,Stmn1,Ankle2,Nek1,Ccar2,Pcm1,Dlgap5,Anln,Mlf1,Nipbl,Cit,Sycp2,Mdc1,Lin9,Lig3,Cdc6,Meikin,Nuf2,Tdrd1,Hfm1,Zfp318,Kif3a,Sept10	8.38e-10
BP	GO:0022402	Cell cycle process	Cdc20,Arpp19,Pttg1,Recql5,Sycp1,Stmn1,Ankle2,Pcm1,Anln,Mlf1,Nipbl,Cit,Sycp2,Cdc6,Meikin,Nuf2,Hfm1,Kif3a,Sept10	1.23e-05
BP	GO:0090304	Nucleic acid metabolic process	Supt5,Pttg1,Twistnb,Recql5,Smn1,Sycp1,Rfc1,Zfp326,Esf1,Ccar2,Shprh,Atrip,Mlf1,Nipbl,Rad18,Zcchc6,Mdc1,Lin9,Srrm2,Lig3,Cdc6,Tdrd1,Hfm1,Srrm1,Baz2a,Rpl14,Lin52,Tcof1	1.23e-05
BP	GO:0051276	Chromosome organization	Cdc20,Pttg1,Recql5,Phf10,Rbl1,Sycp1,Tspyl4,Shprh,Msl1,Nipbl,Cit,Rad18,Meikin,Brd1,Nuf2,Hat1,Hfm1,Baz2a,Sin3a,Jarid2	1.71e-05
BP	GO:0051301	Cell division	Cdc20,Arpp19,Pttg1,Recql5,Sycp1,Stmn1,Ankle2,Nek1,Anln,Cit,Sycp2,Lig3,Cdc6,Nuf2,Sept10	1.71e-05
BP	GO:0006996	Organelle organization	Cdc20,Ap3d1,Pttg1,Recql5,Cap2,Smn1,Cby1,Phf10,Rbl1,Sycp1,Stmn1,Ankle2,Nek1,Tspyl4,Ccar2,Shprh,Pcm1,Ssh2,Msl1,Anln,Nipbl,Cit,Rad18,Sycp2,Lig3,Meikin,Brd1,Nuf2,Hat1,Hfm1,Kif3a,Fsip2,Baz2a,Sin3a,Jarid2	9.21e-05
BP	GO:0043170	Macromolecule metabolic process	Supt5,Cdc20,Ap3d1,Pttg1,Twistnb,Recql5,Smn1,Phf10,Eif2ak2,Sycp1,Rfc1,Zfp326,Nek1,Nktr,Esf1,Ccar2,Shprh,Ssh2,Msl1,Atrip,Adgb,Tiparp,Usp42,Mlf1,Nipbl,Cit,Ilf3,Rad18,Zcchc6,Mdc1,Lin9,Srrm2,Lig3,Cdc6,Usp24,Brd1,Tdrd1,Hat1,Hfm1,Setd4,Usp34,Srrm1,Baz2a,Sin3a,Rpl14,Lin52,Jarid2,Tcof1	9.7e-05
BP	GO:0044260	Cellular macromolecule metabolic process	Supt5,Cdc20,Pttg1,Twistnb,Recql5,Smn1,Phf10,Eif2ak2,Sycp1,Rfc1,Nek1,Nktr,Shprh,Ssh2,Msl1,Atrip,Tiparp,Usp42,Mlf1,Nipbl,Cit,Ilf3,Rad18,Zcchc6,Mdc1,Lin9,Lig3,Cdc6,Usp24,Brd1,Tdrd1,Hat1,Hfm1,Setd4,Usp34,Baz2a,Sin3a,Rpl14,Lin52,Jarid2,Tcof1	0.00016
BP	GO:0006259	DNA metabolic process	Pttg1,Recql5,Sycp1,Rfc1,Shprh,Atrip,Nipbl,Rad18,Mdc1,Lin9,Lig3,Cdc6,Tdrd1,Hfm1,Baz2a	0.00026
BP	GO:0006807	Nitrogen compound metabolic process	Supt5,Cdc20,Pttg1,Twistnb,Recql5,Sgpp1,Smn1,Phf10,Eif2ak2,Sycp1,Rfc1,Zfp326,Nek1,Nktr,Esf1,Ccar2,Shprh,Ssh2,Msl1,Atrip,Adgb,Tiparp,Usp42,Mlf1,Nipbl,Cit,Ilf3,Rad18,Zcchc6,Mdc1,Lin9,Srrm2,Lig3,Cdc6,Usp24,Brd1,Tdrd1,Hat1,Hfm1,Setd4,Usp34,Srrm1,Baz2a,Sin3a,Rpl14,Lin52,Jarid2,Tcof1	0.0013
BP	GO:0071840	Cellular component organization or biogenesis	Cdc20,Ap3d1,Pttg1,Recql5,Cap2,Smn1,Cby1,Phf10,Rbl1,Sycp1,Stmn1,Ankle2,Nek1,Tspyl4,Esf1,Arhgap39,Ccar2,Shprh,Pcm1,Ssh2,Msl1,Anln,Kctd19,Nipbl,Cit,Mdm4,Rad18,Sycp2,Lig3,Meikin,Cdc42ep4,Brd1,Nuf2,Hat1,Hfm1,Kif3a,Crad,Fsip2,Myo9a,Baz2a,Sin3a,Rpl14,Jarid2	0.0014
BP	GO:1901360	Organic cyclic compound metabolic process	Supt5,Pttg1,Twistnb,Recql5,Smn1,Sycp1,Rfc1,Zfp326,Esf1,Ccar2,Shprh,Atrip,Tiparp,Mlf1,Nipbl,Rad18,Zcchc6,Mdc1,Lin9,Srrm2,Lig3,Cdc6,Tdrd1,Hfm1,Srrm1,Baz2a,Rpl14,Lin52,Tcof1	0.0016
BP	GO:0071103	DNA conformation change	Recql5,Sycp1,Tspyl4,Shprh,Nipbl,Rad18,Hat1,Hfm1,Baz2a	0.0018
BP	GO:0007059	Chromosome segregation	Cdc20,Pttg1,Recql5,Sycp1,Nipbl,Cit,Meikin,Nuf2,Hfm1	0.0029
BP	GO:0016043	Cellular component organization	Cdc20,Ap3d1,Pttg1,Recql5,Cap2,Smn1,Cby1,Phf10,Rbl1,Sycp1,Stmn1,Ankle2,Nek1,Tspyl4,Arhgap39,Ccar2,Shprh,Pcm1,Ssh2,Msl1,Anln,Kctd19,Nipbl,Cit,Mdm4,Rad18,Sycp2,Lig3,Meikin,Cdc42ep4,Brd1,Nuf2,Hat1,Hfm1,Kif3a,Crad,Fsip2,Myo9a,Baz2a,Sin3a,Jarid2	0.0031
BP	GO:0000280	Nuclear division	Cdc20,Pttg1,Sycp1,Nipbl,Cit,Sycp2,Meikin,Nuf2,Hfm1	0.0034
BP	GO:0009987	Cellular process	Supt5,Cdc20,Arpp19,Ap3d1,Pttg1,Twistnb,Recql5,Sgpp1,Cap2,Smn1,Cby1,Slc4a8,Phf10,Eif2ak2,Api5,Rbl1,Sycp1,Stmn1,Rfc1,Zfp326,Ankle2,Ccz1,Nek1,Nktr,Tspyl4,Esf1,Arhgap39,Ccar2,Shprh,Pcm1,Dlgap5,Ssh2,Msl1,Tbc1d1,Atrip,Anln,Tiparp,Kctd19,Usp42,Mlf1,Nipbl,Kiaa1109,Cit,Ilf3,Mdm4,Rad18,Zcchc6,Sycp2,Dennd4c,Mdc1,Lin9,Srrm2,Gon4l,Lig3,Cdc6,Meikin,Usp24,Cdc42ep4,Brd1,Nuf2,Tdrd1,Hat1,Hfm1,Zfp318,Setd4,Kif3a,Ma…	0.0034
BP	GO:0098813	Nuclear chromosome segregation	Cdc20,Pttg1,Sycp1,Nipbl,Cit,Meikin,Nuf2,Hfm1	0.0034
BP	GO:0044238	Primary metabolic process	Supt5,Cdc20,Pttg1,Twistnb,Recql5,Sgpp1,Smn1,Phf10,Eif2ak2,Sycp1,Rfc1,Zfp326,Nek1,Nktr,Esf1,Ccar2,Shprh,Ssh2,Msl1,Atrip,Adgb,Tiparp,Usp42,Mlf1,Nipbl,Kiaa1109,Cit,Ilf3,Rad18,Zcchc6,Mdc1,Lin9,Srrm2,Lig3,Cdc6,Usp24,Brd1,Tdrd1,Hat1,Hfm1,Setd4,Usp34,Srrm1,Baz2a,Sin3a,Rpl14,Lin52,Jarid2,Tcof1	0.0035
BP	GO:0034641	Cellular nitrogen compound metabolic process	Supt5,Pttg1,Twistnb,Recql5,Smn1,Eif2ak2,Sycp1,Rfc1,Zfp326,Esf1,Ccar2,Shprh,Atrip,Mlf1,Nipbl,Rad18,Zcchc6,Mdc1,Lin9,Srrm2,Lig3,Cdc6,Tdrd1,Hfm1,Srrm1,Baz2a,Rpl14,Lin52,Tcof1	0.0043
BP	GO:2000113	Negative regulation of cellular macromolecule biosynthetic process	Supt5,Recql5,Cby1,Phf10,Eif2ak2,Rbl1,Rfc1,Ccar2,Nipbl,Ilf3,Zfp608,Mdm4,Gon4l,Lig3,Hat1,Zfp318,Baz2a,Sin3a,Jarid2	0.005
BP	GO:0006974	Cellular response to dna damage stimulus	Pttg1,Recql5,Sycp1,Rfc1,Nek1,Ccar2,Shprh,Atrip,Nipbl,Mdm4,Rad18,Mdc1,Lig3	0.0052
BP	GO:0051321	Meiotic cell cycle	Pttg1,Sycp1,Sycp2,Meikin,Nuf2,Tdrd1,Hfm1,Zfp318	0.006
BP	GO:0045934	Negative regulation of nucleobase-containing compound metabolic process	Supt5,Recql5,Cby1,Phf10,Rbl1,Rfc1,Ccar2,Nipbl,Ilf3,Zfp608,Mdm4,Rad18,Gon4l,Lig3,Hat1,Zfp318,Baz2a,Sin3a,Jarid2	0.0067
BP	GO:0045892	Negative regulation of transcription, dna-templated	Supt5,Recql5,Cby1,Phf10,Rbl1,Rfc1,Ccar2,Nipbl,Ilf3,Zfp608,Mdm4,Gon4l,Hat1,Zfp318,Baz2a,Sin3a,Jarid2	0.0082
BP	GO:0071704	Organic substance metabolic process	Supt5,Cdc20,Ap3d1,Pttg1,Twistnb,Recql5,Sgpp1,Smn1,Phf10,Eif2ak2,Sycp1,Rfc1,Zfp326,Nek1,Nktr,Esf1,Ccar2,Shprh,Ssh2,Msl1,Atrip,Adgb,Tiparp,Usp42,Mlf1,Nipbl,Kiaa1109,Cit,Ilf3,Rad18,Zcchc6,Mdc1,Lin9,Srrm2,Lig3,Cdc6,Usp24,Brd1,Tdrd1,Hat1,Hfm1,Setd4,Usp34,Srrm1,Baz2a,Sin3a,Rpl14,Lin52,Jarid2,Tcof1	0.0082
BP	GO:0000278	Mitotic cell cycle	Cdc20,Arpp19,Pttg1,Recql5,Stmn1,Ankle2,Anln,Nipbl,Cit,Cdc6,Nuf2	0.0106
BP	GO:0006325	Chromatin organization	Phf10,Rbl1,Sycp1,Tspyl4,Shprh,Msl1,Nipbl,Brd1,Hat1,Baz2a,Sin3a,Jarid2	0.0106
BP	GO:0006281	DNA repair	Pttg1,Recql5,Sycp1,Rfc1,Shprh,Atrip,Nipbl,Rad18,Mdc1,Lig3	0.0111
BP	GO:0034645	Cellular macromolecule biosynthetic process	Supt5,Pttg1,Twistnb,Recql5,Smn1,Eif2ak2,Sycp1,Rfc1,Mlf1,Lin9,Lig3,Cdc6,Baz2a,Sin3a,Rpl14,Lin52,Tcof1	0.0111
BP	GO:0000819	Sister chromatid segregation	Cdc20,Pttg1,Nipbl,Cit,Meikin,Nuf2	0.0117
BP	GO:0006351	Transcription, dna-templated	Supt5,Pttg1,Twistnb,Smn1,Mlf1,Lin9,Baz2a,Lin52,Tcof1	0.0117
BP	GO:0016070	RNA metabolic process	Supt5,Pttg1,Twistnb,Smn1,Zfp326,Esf1,Ccar2,Mlf1,Zcchc6,Lin9,Srrm2,Tdrd1,Srrm1,Baz2a,Rpl14,Lin52,Tcof1	0.0117
BP	GO:0010629	Negative regulation of gene expression	Supt5,Recql5,Cby1,Phf10,Eif2ak2,Rbl1,Rfc1,Ccar2,Tiparp,Nipbl,Ilf3,Zfp608,Mdm4,Zcchc6,Gon4l,Tdrd1,Hat1,Zfp318,Baz2a,Sin3a,Jarid2	0.012
BP	GO:1903047	Mitotic cell cycle process	Cdc20,Arpp19,Pttg1,Stmn1,Ankle2,Anln,Nipbl,Cit,Cdc6,Nuf2	0.0127
BP	GO:0044237	Cellular metabolic process	Supt5,Cdc20,Pttg1,Twistnb,Recql5,Sgpp1,Smn1,Phf10,Eif2ak2,Sycp1,Rfc1,Zfp326,Nek1,Nktr,Esf1,Ccar2,Shprh,Ssh2,Msl1,Atrip,Tiparp,Usp42,Mlf1,Nipbl,Cit,Ilf3,Rad18,Zcchc6,Mdc1,Lin9,Srrm2,Lig3,Cdc6,Usp24,Brd1,Tdrd1,Hat1,Hfm1,Setd4,Usp34,Srrm1,Baz2a,Sin3a,Rpl14,Lin52,Jarid2,Tcof1	0.014
BP	GO:0048232	Male gamete generation	Sycp1,Nek1,Usp42,Kiaa1109,Cit,Rad18,Sycp2,Meikin,Tdrd1,Hfm1,Fsip2	0.014
BP	GO:0007062	Sister chromatid cohesion	Cdc20,Pttg1,Nipbl,Meikin	0.0177
BP	GO:0007276	Gamete generation	Sycp1,Nek1,Usp42,Kiaa1109,Cit,Rad18,Zcchc6,Sycp2,Meikin,Tdrd1,Hfm1,Fsip2	0.0177
BP	GO:0000003	Reproduction	Pttg1,Sycp1,Nek1,Tiparp,Usp42,Nipbl,Kiaa1109,Cit,Rad18,Zcchc6,Sycp2,Lin9,Meikin,Nuf2,Tdrd1,Hfm1,Zfp318,Fsip2	0.0207
BP	GO:0045132	Meiotic chromosome segregation	Pttg1,Sycp1,Meikin,Nuf2,Hfm1	0.0221
BP	GO:0140013	Meiotic nuclear division	Pttg1,Sycp1,Sycp2,Meikin,Nuf2,Hfm1	0.0224
BP	GO:0007064	Mitotic sister chromatid cohesion	Cdc20,Pttg1,Nipbl	0.0227
BP	GO:0006323	DNA packaging	Sycp1,Tspyl4,Shprh,Nipbl,Hat1,Baz2a	0.0247
BP	GO:0000070	Mitotic sister chromatid segregation	Cdc20,Pttg1,Nipbl,Cit,Nuf2	0.0298
BP	GO:0032784	Regulation of dna-templated transcription, elongation	Supt5,Recql5,Zfp326,Ccar2	0.0334
BP	GO:0051983	Regulation of chromosome segregation	Pttg1,Nipbl,Cit,Rad18,Cdc6	0.0334
BP	GO:0010605	Negative regulation of macromolecule metabolic process	Supt5,Arpp19,Pttg1,Recql5,Cby1,Phf10,Eif2ak2,Rbl1,Rfc1,Ccar2,Tiparp,Nipbl,Ilf3,Zfp608,Mdm4,Rad18,Zcchc6,Gon4l,Lig3,Tdrd1,Hat1,Zfp318,Baz2a,Sin3a,Jarid2	0.0374
BP	GO:0051726	Regulation of cell cycle	Cdc20,Pttg1,Rbl1,Nek1,Ccar2,Atrip,Mlf1,Nipbl,Cit,Mdm4,Lin9,Cdc6,Cep295,Sin3a	0.0378
